# Supplementary material for: MGVB: a new proteomics toolset for fast and efficient data analysis
Source: Research Square preprint supplement (doi:10.21203/rs.3.rs-4342344/v1), 2024-05-03
Supplement: Supplementary file 1 [file 263b7fc1d5d36475f547d78a.xlsx]

## Sheet: proteinGroups_6files
Supplementary Table 2. MaxQuant analysis of the 6 raw files. The proteinGroups table from the txt directory is shown.
Protein IDs	Majority protein IDs	Peptide counts (all)	Peptide counts (razor+unique)	Peptide counts (unique)	Protein names	Gene names	Fasta headers	Number of proteins	Peptides	Razor + unique peptides	Unique peptides	Peptides GFP_1	Peptides GFP_2	Peptides GFP_3	Peptides WT_1	Peptides WT_2	Peptides WT_3	Razor + unique peptides GFP_1	Razor + unique peptides GFP_2	Razor + unique peptides GFP_3	Razor + unique peptides WT_1	Razor + unique peptides WT_2	Razor + unique peptides WT_3	Unique peptides GFP_1	Unique peptides GFP_2	Unique peptides GFP_3	Unique peptides WT_1	Unique peptides WT_2	Unique peptides WT_3	Sequence coverage [%]	Unique + razor sequence coverage [%]	Unique sequence coverage [%]	Mol. weight [kDa]	Sequence length	Sequence lengths	Fraction average	Fraction 1	Q-value	Score	Sequence coverage GFP_1 [%]	Sequence coverage GFP_2 [%]	Sequence coverage GFP_3 [%]	Sequence coverage WT_1 [%]	Sequence coverage WT_2 [%]	Sequence coverage WT_3 [%]	Intensity	Intensity GFP_1	Intensity GFP_2	Intensity GFP_3
P35579;Q5BKV1;B1AH99;A0A0C4DFM8;REV__S4R3H4;REV__E7EQT4;REV__Q9UKV3;A0A087X0T3;P13535;Q9UKX3;Q9Y623;P12882;P11055;Q9UKX2;A7E2Y1	P35579	148;19;10;3;1;1;1;1;1;1;1;1;1;1;1	148;19;10;3;1;1;1;1;1;1;1;1;1;1;1	120;15;8;0;1;1;1;0;0;0;0;0;0;0;0	Myosin-9	MYH9		15	148	148	120	141	136	137	33	32	35	141	136	137	33	32	35	116	110	113	27	25	27	64	64	52.9	226.53	1960	1960;218;103;508;1283;1301;1341;1982;1937;1938;1939;1939;1940;1941;1941	1	803	0	323.31	61.9	62.3	61.2	22.8	23.2	23.1	17726000000	7881400000	4579600000	5127300000
A0A0G2JNZ2;Q14160;A0A0G2JPP5;H0YCG0;H0YDF9;Q5T0G3;Q9BTT6	A0A0G2JNZ2;Q14160;A0A0G2JPP5	93;93;91;45;7;3;3	93;93;91;45;7;3;3	9;9;9;0;0;3;3	Protein scribble homolog	SCRIB	;;	7	93	93	9	15	13	16	85	88	88	15	13	16	85	88	88	2	2	2	9	8	9	63.1	63.1	5.2	174.91	1630	1630;1630;1655;650;140;154;524	1	737	0	323.31	13.7	12.5	15.6	60.2	61.8	60.2	54662000000	18402000	10183000	15324000
P04264;CON__P04264	P04264;CON__P04264	44;42	41;39	31;29	Keratin, type II cytoskeletal 1	KRT1	;	2	44	41	31	41	41	41	41	41	43	38	39	38	38	38	40	28	29	28	28	28	30	62.1	60.9	51.4	66.038	644	644;644	1	512	0	323.31	59.9	62.1	59.8	58.5	58.4	62.1	20038000000	4969300000	2913200000	3000400000
P78527;F5GX40;H0YG84	P78527	140;2;2	140;2;2	140;2;2	DNA-dependent protein kinase catalytic subunit	PRKDC		3	140	140	140	119	108	107	77	80	84	119	108	107	77	80	84	119	108	107	77	80	84	43.2	43.2	43.2	469.08	4128	4128;70;90	1	694	0	323.31	36.3	33.9	34.7	25	25.4	26.2	1853000000	647040000	336820000	405950000
P68363;P68366;C9JDS9	P68363;P68366	30;22;9	30;22;9	1;1;0	Tubulin alpha-1B chain;Tubulin alpha-4A chain	TUBA1B;TUBA4A	;	3	30	30	1	26	27	25	24	25	27	26	27	25	24	25	27	1	1	1	1	1	1	72.3	72.3	2.9	50.151	451	451;448;156	1	334	0	297.98	67.6	72.3	70.7	64.3	69	63.4	10120000000	1922200000	1448500000	1266500000
CON__P35527;P35527;K7EQQ3;CON__Q99456;Q99456	CON__P35527;P35527;K7EQQ3	39;39;25;1;1	39;39;25;1;1	38;38;25;0;0	Keratin, type I cytoskeletal 9	KRT9	;;	5	39	39	38	38	36	35	36	35	35	38	36	35	36	35	35	37	35	34	35	34	34	68.1	68.1	68.1	62.129	623	623;623;390;494;494	1	474	0	323.31	68.1	66.1	63.9	67.6	63.9	63.7	17872000000	4290800000	2765600000	2668100000
CON__P13645;P13645;CON__P02535-1;CON__Q7Z3Y7;Q7Z3Y7;CON__Q148H6;CON__P05784;CON__Q7Z3Z0;CON__Q7Z3Y8;CON__Q2M2I5;Q7Z3Z0;Q7Z3Y8;Q2M2I5;CON__Q92764;C4AM86;CON__Q14532;CON__A2AB72;CON__O76015;CON__O76013;CON__Q7Z3Y9;Q92764;O76015;O76013;Q7Z3Y9	CON__P13645;P13645	37;37;10;4;4;3;2;2;2;2;2;2;2;1;1;1;1;1;1;1;1;1;1;1	36;36;10;4;4;3;1;2;2;2;2;2;2;1;1;1;1;1;1;1;1;1;1;1	32;32;6;2;2;1;0;1;1;0;1;1;0;0;0;0;0;0;0;0;0;0;0;0	Keratin, type I cytoskeletal 10	KRT10	;	24	37	36	32	34	34	34	34	36	35	33	33	33	33	35	34	30	29	29	29	31	30	58	56.8	52.3	59.51	593	593;584;570;486;464;464;423;450;459;525;450;459;525;425;425;448;453;456;467;468;455;456;467;468	1	371	0	323.31	56.8	58	58	56.8	58	57.8	8563500000	1629400000	1048200000	1046400000
P35908;CON__P35908	P35908;CON__P35908	51;50	51;50	37;36	Keratin, type II cytoskeletal 2 epidermal	KRT2	;	2	51	51	37	42	38	42	43	46	44	42	38	42	43	46	44	30	29	31	30	32	32	84.2	84.2	67.9	65.432	639	639;645	1	408	0	323.31	79.2	75	79.2	77.3	81.1	79.8	9126300000	1899900000	1144200000	1321700000
P35580;E7ERA5;H0Y6I0;Q13439	P35580	132;14;1;1	112;10;1;1	104;10;1;1	Myosin-10	MYH10		4	132	112	104	119	117	121	9	8	13	101	99	104	5	3	7	93	92	96	4	3	6	63.1	53.5	49.7	229	1976	1976;187;2099;2230	1	451	0	323.31	60	60.2	58.5	5.7	5.3	8.4	2816900000	1258300000	767840000	785520000
P68371;Q3ZCM7;M0R2D3;M0QYM7;M0R042;M0R2T4;A0A075B724	P68371	25;9;6;3;2;1;1	25;9;6;3;2;1;1	1;0;0;0;0;0;0	Tubulin beta-4B chain	TUBB4B		7	25	25	1	23	23	22	22	22	23	23	23	22	22	22	23	1	1	1	1	1	1	65.6	65.6	2.7	49.83	445	445;444;155;160;144;104;119	1	260	0	323.31	65.6	61.8	61.8	61.6	61.6	61.6	8767600000	1648700000	1139800000	1087100000
P60709;E7EVS6;G5E9R0;C9JZR7;C9JUM1;Q6S8J3;C9JTX5;A5A3E0;P0CG38;P0CG39;F8WCH0;Q9BYX7	P60709	28;13;11;10;9;9;8;7;6;4;3;3	28;13;11;10;9;9;8;7;6;4;3;3	1;1;1;1;0;0;1;0;0;0;0;0	Actin, cytoplasmic 1;Actin, cytoplasmic 1, N-terminally processed	ACTB		12	28	28	1	27	27	27	14	13	14	27	27	27	14	13	14	1	1	1	0	0	0	82.4	82.4	4.5	41.736	375	375;163;125;102;99;1075;80;1075;1075;1038;52;375	1	249	0	323.31	80.8	81.9	80.8	59.2	52.3	53.6	13697000000	5899900000	3625700000	3869600000
P08670;B0YJC4;B0YJC5;A0A1B0GUA0;A0A1B0GTT5;Q5JVS8;A0A1B0GVG8;P17661;H7C5W5;P41219;F8W835	P08670;B0YJC4	45;43;21;17;13;13;7;5;4;4;1	45;43;21;17;13;13;7;5;4;4;1	41;39;18;16;12;13;7;2;2;2;1	Vimentin	VIM	;	11	45	45	41	27	23	26	44	44	44	27	23	26	44	44	44	24	21	24	40	40	40	82.2	82.2	76.8	53.651	466	466;431;228;176;149;173;109;470;200;470;207	1	279	0	323.31	58.4	51.9	58.6	81.1	81.8	81.1	5962100000	74662000	39079000	47112000
sp|P42212|GFP_AEQVIGreenfluorescentproteinOS=AequoreavictoriaGN=GFPPE=1SV=1;CON__Q9U6Y5	sp|P42212|GFP_AEQVIGreenfluorescentproteinOS=AequoreavictoriaGN=GFPPE=1SV=1;CON__Q9U6Y5	12;12	12;12	12;12			;	2	12	12	12	12	10	11	10	10	10	12	10	11	10	10	10	12	10	11	10	10	10	60.5	60.5	60.5	26.886	238	238;249	1	167	0	80.64	60.5	60.5	60.5	60.5	60.5	60.5	11037000000	2445900000	1873900000	1640200000
C9J4Z3;P61513;G5E9R3;M0R0A1;Q6P4E4;E9PEL3;M0R2L6	C9J4Z3;P61513;G5E9R3;M0R0A1;Q6P4E4;E9PEL3;M0R2L6	3;3;2;2;2;2;2	3;3;2;2;2;2;2	3;3;2;2;2;2;2	60S ribosomal protein L37a	RPL37A	;;;;;;	7	3	3	3	2	2	3	2	2	3	2	2	3	2	2	3	2	2	3	2	2	3	39.7	39.7	39.7	7.624	68	68;92;58;60;72;75;88	1	109	0	75.731	39.7	39.7	39.7	39.7	39.7	39.7	615260000	175140000	107720000	108130000
P05141;Q9H0C2	P05141	23;2	23;2	14;0	ADP/ATP translocase 2;ADP/ATP translocase 2, N-terminally processed	SLC25A5		2	23	23	14	18	20	18	19	19	18	18	20	18	19	19	18	11	11	10	11	11	11	68.8	68.8	48	32.852	298	298;315	1	180	0	101.89	55.4	60.7	59.4	55.4	55.4	52.7	3589300000	595070000	464810000	484470000
F8VPD4;P27708;H7C2E4;H7BZB3;H7C3Z5;P31327	F8VPD4;P27708	56;56;9;5;4;1	56;56;9;5;4;1	56;56;9;5;4;1	CAD protein;Glutamine-dependent carbamoyl-phosphate synthase;Aspartate carbamoyltransferase;Dihydroorotase	CAD	;	6	56	56	56	44	43	42	28	30	34	44	43	42	28	30	34	44	43	42	28	30	34	36.6	36.6	36.6	236.02	2162	2162;2225;293;279;269;1500	1	239	0	234.31	29.7	29.4	28.8	18.5	21	24.1	490240000	151410000	87245000	92014000
P15924	P15924	50	50	50	Desmoplakin	DSP		1	50	50	50	38	34	34	33	30	35	38	34	34	33	30	35	38	34	34	33	30	35	20.7	20.7	20.7	331.77	2871	2871	1	223	0	252.57	16	14.3	14.1	13.5	12	14.2	250950000	69358000	37259000	40497000
Q6WCQ1;J3KSK7;A8MZF8	Q6WCQ1	56;6;2	56;6;2	9;6;2	Myosin phosphatase Rho-interacting protein	MPRIP		3	56	56	9	47	49	51	0	0	0	47	49	51	0	0	0	9	9	8	0	0	0	57.5	57.5	10.7	116.53	1025	1025;139;63	1	195	0	323.31	53.5	54.9	52.9	0	0	0	882800000	375280000	264770000	242750000
Q9UJS0;R4GN64	Q9UJS0	29;3	29;3	25;3	Calcium-binding mitochondrial carrier protein Aralar2	SLC25A13		2	29	29	25	24	25	25	27	26	25	24	25	25	27	26	25	21	22	22	23	22	22	57.9	57.9	52.1	74.175	675	675;73	1	193	0	178.07	51.9	52.4	53	54.8	54.7	50.1	573260000	96504000	67310000	69180000
Q92616	Q92616	61	61	61	Translational activator GCN1	GCN1L1		1	61	61	61	37	47	47	13	14	12	37	47	47	13	14	12	37	47	47	13	14	12	31.7	31.7	31.7	292.75	2671	2671	1	195	0	232.77	20.9	24.3	25.3	8.4	9.8	7.2	107470000	39581000	29149000	30865000
CON__P08779;P08779;CON__Q9Z2K1;CON__Q3ZAW8;K7ENW6	CON__P08779;P08779	33;33;14;14;11	30;30;12;12;11	17;17;4;4;9	Keratin, type I cytoskeletal 16	KRT16	;	5	33	30	17	28	27	26	23	23	25	26	24	23	20	20	22	16	15	14	13	13	15	67.2	62.4	42.3	51.267	473	473;473;469;474;162	1	178	0	248.14	62.4	60.3	60	51.6	51.8	55.6	1132600000	291020000	211380000	175770000
O14654;H3BTC1	O14654	34;1	34;1	34;1	Insulin receptor substrate 4	IRS4		2	34	34	34	21	21	21	27	28	29	21	21	21	27	28	29	21	21	21	27	28	29	42.2	42.2	42.2	133.77	1257	1257;37	1	176	0	192.03	28.3	26	25.1	32.9	31.7	35	429000000	70823000	41442000	45339000
Q9NVI7	Q9NVI7	28	28	1	ATPase family AAA domain-containing protein 3A	ATAD3A		1	28	28	1	25	26	23	20	26	24	25	26	23	20	26	24	1	1	1	1	1	1	50	50	1.3	71.368	634	634	1	163	0	155.75	45	49.8	45.4	39.6	46.5	46.8	480850000	96966000	61892000	56803000
Q5VTE0;P68104;A0A087WVQ9;A0A087WV01;Q05639;Q5JR01;A6PW80	Q5VTE0;P68104;A0A087WVQ9;A0A087WV01;Q05639	18;18;15;14;9;5;4	18;18;15;14;9;5;4	18;18;15;14;9;5;4	Putative elongation factor 1-alpha-like 3;Elongation factor 1-alpha 1;Elongation factor 1-alpha;Elongation factor 1-alpha 2	EEF1A1P5;EEF1A1;EEF1A2	;;;;	7	18	18	18	15	12	10	11	13	15	15	12	10	11	13	15	15	12	10	11	13	15	53	53	53	50.184	462	462;462;441;426;463;145;106	1	137	0	64.145	50.2	43.3	34.6	37.2	39.8	47.8	2292100000	435260000	256890000	244010000
Q92621;U3KQ97;U3KPX2	Q92621	39;2;2	39;2;2	39;2;2	Nuclear pore complex protein Nup205	NUP205		3	39	39	39	33	35	33	12	13	16	33	35	33	12	13	16	33	35	33	12	13	16	26.9	26.9	26.9	227.92	2012	2012;184;273	1	162	0	135.49	22.9	23.6	22	7	7.6	12.5	91390000	36737000	21565000	23111000
CON__P13647;P13647;H0YI76;F8W0C6;H0YIN9;F8VV57;CON__P07744;CON__H-INV:HIT000016045;F8VP67;F8VU69;CON__H-INV:HIT000292931;H0YHD9;B4DIR1;K7ELP4;F8VS61;K7EJU1;K7EKH9;CON__REFSEQ:XP_932229;Q8IWY7;P14136	CON__P13647;P13647	36;36;16;13;10;5;5;3;3;2;2;1;1;1;1;1;1;1;1;1	27;27;12;8;8;5;0;0;0;2;0;0;0;0;0;0;0;0;0;0	8;8;5;0;1;2;0;0;0;0;0;0;0;0;0;0;0;0;0;0	Keratin, type II cytoskeletal 5	KRT5	;	20	36	27	8	30	26	29	29	30	28	23	21	23	20	21	20	7	6	8	5	6	5	55.9	46.4	12.5	62.378	590	590;590;201;178;196;132;525;99;113;147;443;143;179;189;248;248;261;345;1649;432	1	159	0	183.64	49.7	46.8	43.1	48.8	48.8	46.9	1077600000	255730000	178430000	160750000
P25705;K7EK77;K7ERX7;K7EJP1;K7ENJ4;K7EQH4;K7ESA0	P25705	26;11;10;8;8;7;2	26;11;10;8;8;7;2	26;11;10;8;8;7;2	ATP synthase subunit alpha, mitochondrial	ATP5A1		7	26	26	26	21	23	19	21	24	22	21	23	19	21	24	22	21	23	19	21	24	22	53.5	53.5	53.5	59.75	553	553;207;205;144;199;111;77	1	149	0	270.36	46.1	48.8	45	48.1	50.8	48.1	519560000	130880000	75258000	79281000
P33993;C9J8M6	P33993	30;5	30;5	30;5	DNA replication licensing factor MCM7	MCM7		2	30	30	30	21	20	23	22	23	23	21	20	23	22	23	23	21	20	23	22	23	23	53.5	53.5	53.5	81.307	719	719;183	1	161	0	172.34	38.4	37.4	41.3	39.9	41.4	41	244770000	53886000	32136000	34951000
K7ELC2;P62841;K7EM56;A0A0B4J2B4;S4R417;K7EQJ5;K7EJ78;S4R456	K7ELC2;P62841;K7EM56;A0A0B4J2B4;S4R417;K7EQJ5;K7EJ78	7;7;6;6;6;5;4;3	7;7;6;6;6;5;4;3	7;7;6;6;6;5;4;3	40S ribosomal protein S15	RPS15	;;;;;;	8	7	7	7	5	5	5	7	6	6	5	5	5	7	6	6	5	5	5	7	6	6	61.8	61.8	61.8	17.723	152	152;145;112;118;135;141;129;68	1	98	0	41.666	53.3	53.3	53.3	61.8	61.8	53.3	1584000000	420850000	211200000	268820000
Q9P0K7;D6RB27;D6R9G4;D6RBY4;D6REL2;D6R9G6;D6RF74;D6RE17;D6RB25;D6RBW6	Q9P0K7	47;4;4;4;4;4;4;4;2;2	47;4;4;4;4;4;4;4;2;2	47;4;4;4;4;4;4;4;2;2	Ankycorbin	RAI14		10	47	47	47	40	44	41	0	0	0	40	44	41	0	0	0	40	44	41	0	0	0	57.1	57.1	57.1	110.04	980	980;104;107;114;125;126;139;150;56;66	1	159	0	323.31	50.3	52	47.9	0	0	0	655400000	275770000	197220000	182410000
Q14204;H0YJ21	Q14204	57;1	57;1	57;1	Cytoplasmic dynein 1 heavy chain 1	DYNC1H1		2	57	57	57	41	42	36	9	11	9	41	42	36	9	11	9	41	42	36	9	11	9	18.3	18.3	18.3	532.4	4646	4646;180	1	155	0	149.6	13.6	14.2	11.2	3.3	3.9	3.6	86013000	41552000	20336000	18585000
P62269;A0A0G2JQH2;Q5GGW2;J3JS69	P62269	16;5;5;3	16;5;5;3	16;5;5;3	40S ribosomal protein S18	RPS18		4	16	16	16	14	15	16	14	15	13	14	15	16	14	15	13	14	15	16	14	15	13	63.2	63.2	63.2	17.718	152	152;33;34;82	1	102	0	71.434	54.6	59.2	63.2	59.2	59.2	54.6	7401300000	2247600000	1331500000	1177500000
P11142;E9PKE3;E9PN89;E9PNE6;E9PLF4;A8K7Q2;E9PQQ4;E9PQK7;E9PK54;E9PPY6;P54652;E9PN25;E9PI65;E9PM13;E9PS65	P11142;E9PKE3;E9PN89;E9PNE6	24;23;17;15;11;11;10;10;10;9;9;7;7;4;4	22;21;17;13;10;10;9;9;9;8;7;6;6;3;3	20;19;15;12;9;9;9;9;9;8;5;6;5;3;3	Heat shock cognate 71 kDa protein	HSPA8	;;;	15	24	22	20	16	19	19	21	21	23	14	17	17	20	20	21	12	15	15	18	18	19	39.6	36.5	35.1	70.897	646	646;627;312;500;187;410;171;178;183;137;639;132;168;150;223	1	141	0	95.968	32.5	34.8	35	38.5	38.5	39.6	453020000	42121000	29468000	35296000
P23396;E9PL09;E9PPU1;H0YEU2;F2Z2S8;H0YCJ7;H0YF32;E9PQ96;E9PJH4;E9PK82;E9PSF4;E9PQX2;E9PJN9	P23396;E9PL09;E9PPU1;H0YEU2;F2Z2S8;H0YCJ7	18;15;14;11;10;10;8;7;7;7;6;3;1	18;15;14;11;10;10;8;7;7;7;6;3;1	17;14;13;10;9;9;7;6;6;6;6;2;1	40S ribosomal protein S3	RPS3	;;;;;	13	18	18	17	14	15	15	17	15	15	14	15	15	17	15	15	13	14	14	16	14	14	71.6	71.6	67.9	26.688	243	243;231;158;171;117;135;123;91;115;128;103;44;36	1	109	0	79.143	63	63	63.4	71.6	63.4	66.7	1974300000	329760000	234030000	224780000
Q9Y285;K7ER00;K7EPH2;K7ER16;K7ERS0;K7EK06	Q9Y285;K7ER00;K7EPH2	19;18;12;9;4;4	19;18;12;9;4;4	19;18;12;9;4;4	Phenylalanine--tRNA ligase alpha subunit	FARSA	;;	6	19	19	19	14	16	17	17	15	15	14	16	17	17	15	15	14	16	17	17	15	15	56.3	56.3	56.3	57.563	508	508;548;378;235;159;168	1	126	0	120.49	52	56.3	56.3	53.7	51.2	51.2	465100000	96405000	55579000	67525000
P12236	P12236	21	13	11	ADP/ATP translocase 3;ADP/ATP translocase 3, N-terminally processed	SLC25A6		1	21	13	11	14	19	17	18	17	17	8	11	10	11	10	11	6	9	9	10	9	10	71.8	50.7	41.6	32.866	298	298	1	100	0	51.955	56.4	70.1	57.7	57.7	56	55	569800000	85380000	63627000	67589000
A0A0G2JIW1;P0DMV9;P0DMV8;V9GZ37	A0A0G2JIW1;P0DMV9;P0DMV8;V9GZ37	25;25;25;16	25;25;25;16	11;11;11;6	Heat shock 70 kDa protein 1B;Heat shock 70 kDa protein 1A	HSPA1B;HSPA1A	;;;	4	25	25	11	15	15	15	20	21	21	15	15	15	20	21	21	4	4	5	9	10	10	46.4	46.4	19.6	70.108	642	642;641;641;476	1	131	0	108.38	29	29	30.7	37.1	42.1	39.4	521730000	39869000	26199000	23468000
CON__Q86YZ3;Q86YZ3	CON__Q86YZ3;Q86YZ3	15;15	15;15	15;15	Hornerin	HRNR	;	2	15	15	15	10	12	13	12	10	11	10	12	13	12	10	11	10	12	13	12	10	11	18.8	18.8	18.8	282.39	2850	2850;2850	1	117	0	111.72	11.1	16.2	16.2	15.8	12	16	112850000	34742000	15875000	20540000
O14980;C9JKM9;C9J673;C9IZS4;C9JQ02;C9JV99;F8WF71;C9IYM2;H7BZC5;C9JF49	O14980	28;8;7;6;6;6;5;4;4;3	28;8;7;6;6;6;5;4;4;3	28;8;7;6;6;6;5;4;4;3	Exportin-1	XPO1		10	28	28	28	24	22	24	13	13	15	24	22	24	13	13	15	24	22	24	13	13	15	34.6	34.6	34.6	123.38	1071	1071;179;132;94;95;100;82;62;72;59	1	124	0	144.12	28.8	27.7	28.6	15	15.5	16.7	130330000	47869000	26952000	33345000
P08238;Q58FF7;Q58FF6;F8W026;Q96GW1;Q58FG1;P14625	P08238	23;8;3;1;1;1;1	23;8;3;1;1;1;1	11;3;0;1;1;0;1	Heat shock protein HSP 90-beta	HSP90AB1		7	23	23	11	15	16	17	20	22	20	15	16	17	20	22	20	7	8	8	8	11	9	37.2	37.2	17.1	83.263	724	724;597;505;48;315;418;803	1	128	0	162.14	24.6	26	26.8	32.9	34.4	31.9	385460000	62481000	36476000	41263000
P04406;E7EUT5	P04406;E7EUT5	13;9	13;9	13;9	Glyceraldehyde-3-phosphate dehydrogenase	GAPDH	;	2	13	13	13	9	11	11	13	11	12	9	11	11	13	11	12	9	11	11	13	11	12	63.6	63.6	63.6	36.053	335	335;260	1	98	0	91.184	41.5	57	53.1	63.6	59.1	59.4	592970000	94875000	85198000	83853000
P17987;E7EQR6;F5H282;E7ERF2;F5GZ03;F5GZI8;F5H726;F5H676;F5H136;F5GYL4	P17987;E7EQR6;F5H282;E7ERF2	22;16;14;14;7;5;4;4;4;3	22;16;14;14;7;5;4;4;4;3	22;16;14;14;7;5;4;4;4;3	T-complex protein 1 subunit alpha	TCP1	;;;	10	22	22	22	19	19	19	13	14	15	19	19	19	13	14	15	19	19	19	13	14	15	55.2	55.2	55.2	60.343	556	556;401;332;433;221;100;91;111;136;65	1	116	0	120.96	48.6	47.8	47.8	34.5	36.2	38.7	163960000	48080000	28258000	34189000
Q5JP53;P07437;Q5ST81;A0A075B736;Q5SQY0;A6NNZ2;CON__ENSEMBL:ENSBTAP00000025008;Q9H4B7	Q5JP53;P07437;Q5ST81	24;24;21;8;8;8;5;5	6;6;3;0;0;0;0;0	5;5;3;0;0;0;0;0	Tubulin beta chain	TUBB	;;	8	24	6	5	23	24	23	22	21	22	6	6	6	6	5	6	5	5	5	5	4	5	64.6	20.4	16.9	47.766	426	426;444;372;407;410;444;536;451	1	64	0	145.41	64.6	64.6	64.6	60.3	60.3	60.3	2725600000	467600000	353800000	341740000
P04843;B7Z4L4;F8WF32	P04843;B7Z4L4	23;15;5	23;15;5	23;15;5	Dolichyl-diphosphooligosaccharide--protein glycosyltransferase subunit 1	RPN1	;	3	23	23	23	16	16	20	15	16	16	16	16	20	15	16	16	16	16	20	15	16	16	53.5	53.5	53.5	68.569	607	607;435;121	1	114	0	77.274	35.4	36.4	46.1	32.6	36.6	35.6	220650000	48793000	35211000	47175000
P49368;B4DUR8;E9PRC8;Q5SZX6;E9PQ35;E9PM09;Q5SZX9;Q5SZW8	P49368;B4DUR8	20;19;8;8;5;4;4;4	20;19;8;8;5;4;4;4	20;19;8;8;5;4;4;4	T-complex protein 1 subunit gamma	CCT3	;	8	20	20	20	19	20	16	14	14	15	19	20	16	14	14	15	19	20	16	14	14	15	46.4	46.4	46.4	60.533	545	545;500;234;276;144;154;161;188	1	116	0	64.911	44.4	46.4	40	34.1	37.2	36	279660000	80597000	56837000	44270000
P14923;C9JTX4;C9J826;C9JK18;C9JKY1;B4DGU4;P35222;C9JPI2;K7ERP3	P14923	20;7;7;7;7;2;2;1;1	20;7;7;7;7;2;2;1;1	20;7;7;7;7;2;2;1;1	Junction plakoglobin	JUP		9	20	20	20	16	16	16	14	12	12	16	16	16	14	12	12	16	16	16	14	12	12	35.6	35.6	35.6	81.744	745	745;235;276;295;297;774;781;86;104	1	102	0	158.26	27.9	28.6	27.7	24.8	20.4	21.7	122670000	25370000	18362000	20856000
P06576;H0YH81;F8W079;F8W0P7;H0YI37	P06576;H0YH81;F8W079	19;15;10;7;4	19;15;10;7;4	19;15;10;7;4	ATP synthase subunit beta, mitochondrial;ATP synthase subunit beta	ATP5B	;;	5	19	19	19	18	18	17	12	8	11	18	18	17	12	8	11	18	18	17	12	8	11	64.5	64.5	64.5	56.559	529	529;362;284;270;133	1	99	0	107.88	62.4	61.4	54.4	36.5	25.9	35.7	154570000	57850000	32481000	32882000
M0R0F0;P46782;M0R0R2;M0QZN2	M0R0F0;P46782;M0R0R2;M0QZN2	14;14;13;8	14;14;13;8	14;14;13;8	40S ribosomal protein S5;40S ribosomal protein S5, N-terminally processed	RPS5	;;;	4	14	14	14	12	13	12	10	9	9	12	13	12	10	9	9	12	13	12	10	9	9	70	70	70	22.391	200	200;204;225;134	1	82	0	79.615	66	69.5	57.5	61.5	53	53	379960000	105560000	46819000	59146000
Q9UG63;C9JHK9;C9JZV3	Q9UG63;C9JHK9;C9JZV3	20;10;10	20;10;10	20;10;10	ATP-binding cassette sub-family F member 2	ABCF2	;;	3	20	20	20	13	13	13	11	10	15	13	13	13	11	10	15	13	13	13	11	10	15	42.5	42.5	42.5	71.289	623	623;240;287	1	107	0	70.963	24.6	25.8	25.8	24.1	25.8	30.5	267860000	40102000	32500000	32879000
P13639	P13639	24	24	24	Elongation factor 2	EEF2		1	24	24	24	15	14	17	15	16	14	15	14	17	15	16	14	15	14	17	15	16	14	36.4	36.4	36.4	95.337	858	858	1	99	0	54.682	24.4	21.4	26.3	23.5	27.7	20.6	82863000	16319000	9587700	12413000
Q02978;I3L1P8	Q02978;I3L1P8	16;13	16;13	16;13	Mitochondrial 2-oxoglutarate/malate carrier protein	SLC25A11	;	2	16	16	16	12	13	12	12	13	13	12	13	12	12	13	13	12	13	12	12	13	13	56.1	56.1	56.1	34.061	314	314;296	1	85	0	64.085	49.4	44.6	44.3	39.8	43	47.5	240180000	48999000	32881000	33535000
Q8N1F7;H3BVG0;H3BM93;H3BRI8;H3BV11;H3BMX0;H3BNN5;H3BP95;H3BRD9;H3BV15;H3BVE2;H3BPA9;H3BNG7	Q8N1F7;H3BVG0	22;21;8;7;6;5;5;5;4;3;3;3;1	22;21;8;7;6;5;5;5;4;3;3;3;1	22;21;8;7;6;5;5;5;4;3;3;3;1	Nuclear pore complex protein Nup93	NUP93	;	13	22	22	22	16	18	19	11	14	14	16	18	19	11	14	14	16	18	19	11	14	14	38.1	38.1	38.1	93.487	819	819;880;178;151;136;125;132;156;140;84;117;229;40	1	94	0	77.039	24.8	32.2	31.6	19.3	24.7	23.2	106490000	31958000	21149000	24295000
P49411;H3BNU3	P49411	20;2	20;2	20;2	Elongation factor Tu, mitochondrial	TUFM		2	20	20	20	13	13	12	15	16	13	13	13	12	15	16	13	13	13	12	15	16	13	54.2	54.2	54.2	49.541	452	452;101	1	100	0	111.65	36.7	38.3	36.1	43.6	44.9	37.8	301360000	47092000	31864000	27485000
Q9H583;Q5T3Q7;Q6P664	Q9H583;Q5T3Q7	28;26;1	28;26;1	28;26;1	HEAT repeat-containing protein 1;HEAT repeat-containing protein 1, N-terminally processed	HEATR1	;	3	28	28	28	21	19	20	10	8	7	21	19	20	10	8	7	21	19	20	10	8	7	18.5	18.5	18.5	242.37	2144	2144;2063;120	1	94	0	77.243	12.9	12.6	13.8	7.6	5.8	4.9	28041000	12037000	6678800	6062900
P04844;Q5JYR7;Q5JYR4;F2Z3K5;Q5JYR3;H0Y5M1	P04844	19;8;7;5;3;2	19;8;7;5;3;2	19;8;7;5;3;2	Dolichyl-diphosphooligosaccharide--protein glycosyltransferase subunit 2	RPN2		6	19	19	19	17	17	14	10	8	8	17	17	14	10	8	8	17	17	14	10	8	8	51.3	51.3	51.3	69.283	631	631;344;166;162;138;147	1	94	0	81.927	51.3	48.7	44.2	30.6	28.2	25.5	104940000	41851000	27399000	21414000
Q9NU22;Q5T795;M0QXR3	Q9NU22	36;15;1	36;15;1	36;15;1	Midasin	MDN1		3	36	36	36	24	24	20	7	8	7	24	24	20	7	8	7	24	24	20	7	8	7	8.8	8.8	8.8	632.81	5596	5596;1181;62	1	97	0	88.553	5.9	5.9	5	2.1	1.9	1.9	28410000	10232000	8958500	6281500
Q9UHB6;F8VQE1;F8VS07;F8VRN8;F8VTU2;F8VVQ7	Q9UHB6;F8VQE1;F8VS07;F8VRN8	34;26;20;18;6;4	34;26;20;18;6;4	34;26;20;18;6;4	LIM domain and actin-binding protein 1	LIMA1	;;;	6	34	34	34	25	28	27	0	0	0	25	28	27	0	0	0	25	28	27	0	0	0	58.8	58.8	58.8	85.225	759	759;598;456;388;130;111	1	109	0	197.11	45.6	50.5	44.4	0	0	0	247060000	103880000	73369000	69807000
O14950	O14950	13	13	1	Myosin regulatory light chain 12B	MYL12B		1	13	13	1	13	13	12	5	7	6	13	13	12	5	7	6	1	1	1	0	0	0	80.2	80.2	17.4	19.779	172	172	1	80	0	258.06	80.2	80.2	80.2	34.3	50.6	40.1	1697100000	735220000	451290000	487450000
P05023;M0R116;A0A0A0MT26;P13637;B1AKY9;P50993;H0Y7C1;Q13733;Q5TC01;M0QXF2;P20648;Q5TC02;E9PRA5;P54707	P05023	23;9;9;9;6;6;4;3;2;2;2;1;1;1	23;9;9;9;6;6;4;3;2;2;2;1;1;1	23;9;9;9;6;6;4;3;2;2;2;1;1;1	Sodium/potassium-transporting ATPase subunit alpha-1	ATP1A1		14	23	23	23	19	15	21	11	12	10	19	15	21	11	12	10	19	15	21	11	12	10	29.8	29.8	29.8	112.89	1023	1023;983;1226;1013;1009;1020;714;1029;144;251;1035;106;517;1039	1	94	0	132.52	25.4	21	26.6	15.2	17	14.5	143190000	49117000	28483000	33274000
CON__P02533;P02533;CON__Q6IFX2;CON__A2A4G1;CON__Q61782;CON__P19001;K7ENV3;CON__Q9D312;C9JTG5;CON__Q8N1A0;Q8N1A0	CON__P02533;P02533	31;31;13;6;5;4;3;3;1;1;1	16;16;6;0;2;0;0;0;0;0;0	11;11;4;0;2;0;0;0;0;0;0	Keratin, type I cytoskeletal 14	KRT14	;	11	31	16	11	25	26	22	22	20	19	14	14	11	12	11	9	9	10	7	8	8	7	63.8	39	30.1	51.621	472	472;472;452;456;93;403;48;431;220;295;295	1	88	0	164.89	57	56.4	49.6	52.1	45.6	46.8	600010000	152270000	97781000	97558000
P07814;V9GYZ6;V9GZ76	P07814;V9GYZ6	28;15;1	28;15;1	28;15;1	Bifunctional glutamate/proline--tRNA ligase;Glutamate--tRNA ligase;Proline--tRNA ligase	EPRS	;	3	28	28	28	23	19	24	7	6	7	23	19	24	7	6	7	23	19	24	7	6	7	25.5	25.5	25.5	170.59	1512	1512;968;194	1	94	0	124.13	21.7	17.3	21.6	6.2	5.4	6	86958000	38264000	16962000	21538000
H7BY10;K7EJV9;K7ERT8;A8MUS3;P62750;K7EMA7	H7BY10;K7EJV9;K7ERT8;A8MUS3;P62750;K7EMA7	9;9;9;9;9;7	9;9;9;9;9;7	9;9;9;9;9;7	60S ribosomal protein L23a	RPL23A	;;;;;	6	9	9	9	8	8	9	7	7	7	8	8	9	7	7	7	8	8	9	7	7	7	43.7	43.7	43.7	17.692	158	158;170;175;194;156;70	1	69	0	47.111	43.7	43.7	43.7	43.7	43.7	43.7	614140000	189270000	112640000	128210000
P62277;J3KMX5;E9PS50	P62277;J3KMX5	10;8;3	10;8;3	10;8;3	40S ribosomal protein S13	RPS13	;	3	10	10	10	9	8	10	8	7	8	9	8	10	8	7	8	9	8	10	8	7	8	52.3	52.3	52.3	17.222	151	151;148;116	1	68	0	35.394	47	39.7	52.3	46.4	39.1	46.4	787130000	192220000	118210000	126490000
P62249;M0R210;M0R3H0;A0A087WZ27;M0R1M5;Q6IPX4;M0QX76	P62249;M0R210;M0R3H0;A0A087WZ27;M0R1M5	11;9;8;7;6;5;4	11;9;8;7;6;5;4	11;9;8;7;6;5;4	40S ribosomal protein S16	RPS16;ZNF90	;;;;	7	11	11	11	10	10	10	10	10	10	10	10	10	10	10	10	10	10	10	10	10	10	52.7	52.7	52.7	16.445	146	146;129;100;129;85;152;50	1	67	0	50.407	51.4	50.7	50.7	50.7	50.7	50.7	1502800000	289400000	185950000	187400000
A0A087X0X3;P52272;M0QZM1;M0R019;M0R2T0;M0R0N3;M0R2I7;M0QYQ7;M0QY96;M0R0Y6;M0QYL3	A0A087X0X3;P52272;M0QZM1	21;21;11;10;10;7;6;6;4;3;3	21;21;11;10;10;7;6;6;4;3;3	21;21;11;10;10;7;6;6;4;3;3	Heterogeneous nuclear ribonucleoprotein M	HNRNPM	;;	11	21	21	21	16	18	17	10	11	8	16	18	17	10	11	8	16	18	17	10	11	8	42.1	42.1	42.1	77.569	730	730;730;383;352;357;275;214;219;116;99;99	1	87	0	98.267	32.3	35.6	35.5	21.5	23.4	17.9	126500000	36425000	25874000	28805000
P17812;Q9NRF8	P17812	14;2	14;2	14;2	CTP synthase 1	CTPS1		2	14	14	14	11	9	11	12	11	10	11	9	11	12	11	10	11	9	11	12	11	10	27.4	27.4	27.4	66.69	591	591;586	1	71	0	53.535	22.8	17.9	21	24.2	23.9	21.8	98745000	24656000	14709000	17633000
P08708;H0YN88;A0A075B716;H0YN73;H3BNC9	P08708;H0YN88;A0A075B716	11;10;10;5;2	11;10;10;5;2	11;10;10;5;2	40S ribosomal protein S17	RPS17	;;	5	11	11	11	8	10	9	8	9	9	8	10	9	8	9	9	8	10	9	8	9	9	60	60	60	15.55	135	135;136;191;59;293	1	96	0	79.447	57	60	60	57	60	60	1661000000	476470000	292710000	346750000
A0A087WWU8;D6R904;D6RFM2;K7EP68	A0A087WWU8;D6R904	23;14;6;5	23;14;6;5	0;0;0;0		TPM3	;	4	23	23	0	18	20	22	0	1	1	18	20	22	0	1	1	0	0	0	0	0	0	59	59	0	26.42	227	227;95;49;138	1	79	0	132.2	52.9	58.6	58.6	0	5.3	4.4	724800000	320100000	189680000	214290000
Q16891;B9A067;D6RAW4	Q16891;B9A067	27;26;3	27;26;3	1;0;0	MICOS complex subunit MIC60	IMMT	;	3	27	27	1	22	18	20	4	2	4	22	18	20	4	2	4	1	1	1	0	0	0	46.3	46.3	3.3	83.677	758	758;711;147	1	79	0	63.736	36.8	30.3	34.4	6.6	2.6	6.6	144980000	59197000	37912000	41461000
CON__P02769;H0YA55;A0A0C4DGB6;CON__P02768-1;P02768;A0A087WWT3;C9JKR2;D6RHD5;B7WNR0;H7C013	CON__P02769	16;3;3;3;3;2;2;2;2;1	16;3;3;3;3;2;2;2;2;1	16;3;3;3;3;2;2;2;2;1				10	16	16	16	11	9	11	12	13	13	11	9	11	12	13	13	11	9	11	12	13	13	24.2	24.2	24.2	69.293	607	607;454;604;609;609;396;417;459;494;197	1	74	0	63.95	20.6	16.5	18.1	20.4	20.6	20.6	257050000	32297000	18618000	24015000
Q02413	Q02413	18	18	18	Desmoglein-1	DSG1		1	18	18	18	12	11	11	10	10	10	12	11	11	10	10	10	12	11	11	10	10	10	24.6	24.6	24.6	113.75	1049	1049	1	80	0	67.216	18.4	14.6	15.5	15.1	13.8	12.8	82082000	19201000	11800000	12251000
A0A0U1RQF0;P49327;A0A0U1RRG3;A0A1B0GTR5	A0A0U1RQF0;P49327	24;24;3;1	24;24;3;1	24;24;3;1	Fatty acid synthase;[Acyl-carrier-protein] S-acetyltransferase;[Acyl-carrier-protein] S-malonyltransferase;3-oxoacyl-[acyl-carrier-protein] synthase;3-oxoacyl-[acyl-carrier-protein] reductase;3-hydroxyacyl-[acyl-carrier-protein] dehydratase;Enoyl-[acyl-carrier-protein] reductase;Oleoyl-[acyl-carrier-protein] hydrolase	FASN	;	4	24	24	24	15	10	16	9	12	12	15	10	16	9	12	12	15	10	16	9	12	12	15.6	15.6	15.6	273.2	2509	2509;2511;150;18	1	78	0	60.474	9.7	5.7	9	5.7	8	8.4	24797000	7319400	2524100	5275400
O43175;Q5SZU1	O43175;Q5SZU1	16;13	16;13	16;13	D-3-phosphoglycerate dehydrogenase	PHGDH	;	2	16	16	16	13	12	10	9	9	10	13	12	10	9	9	10	13	12	10	9	9	10	41.1	41.1	41.1	56.65	533	533;499	1	70	0	92.095	37	34.7	29.6	28.3	28.3	30.8	98171000	31632000	17203000	13566000
Q96HS1;F5GXG4	Q96HS1	14;5	14;5	14;5	Serine/threonine-protein phosphatase PGAM5, mitochondrial	PGAM5		2	14	14	14	9	9	9	12	11	11	9	9	9	12	11	11	9	9	9	12	11	11	52.2	52.2	52.2	32.004	289	289;140	1	78	0	43.569	30.1	35.3	31.1	43.3	40.5	49.8	223870000	27021000	16958000	17643000
E9PDF6;O43795;E7EQD9;H7C2Y7;C9JUP5;C9JYW1;A0A0U1RRI3;C9K0I9;G3V342;A0A140TA25;Q8N1T3;Q9UBC5	E9PDF6;O43795	28;27;8;5;4;4;4;3;1;1;1;1	28;27;8;5;4;4;4;3;1;1;1;1	28;27;8;5;4;4;4;3;1;1;1;1	Unconventional myosin-Ib	MYO1B	;	12	28	28	28	20	19	20	3	3	5	20	19	20	3	3	5	20	19	20	3	3	5	29.5	29.5	29.5	128.48	1107	1107;1136;303;192;149;163;189;83;688;1038;1032;1043	1	76	0	79.488	21.8	23.4	24.1	3.1	3.7	6.4	71560000	29605000	18676000	19760000
P55060	P55060	18	18	18	Exportin-2	CSE1L		1	18	18	18	15	12	12	4	7	4	15	12	12	4	7	4	15	12	12	4	7	4	28.3	28.3	28.3	110.42	971	971	1	66	0	61.674	24.1	20.3	19.2	9.5	13.7	7.3	93078000	50938000	12646000	26907000
CON__P00761	CON__P00761	5	5	5				1	5	5	5	5	5	4	4	4	4	5	5	4	4	4	4	5	5	4	4	4	4	31.2	31.2	31.2	24.409	231	231	1	55	0	72.998	31.2	31.2	25.1	25.1	25.1	25.1	4679900000	1105400000	589610000	704210000
G8JLA2;F8VZU9;F8W180;F8VXL3	G8JLA2;F8VZU9;F8W180	8;5;5;2	8;5;5;2	1;1;1;1		MYL6	;;	4	8	8	1	8	8	8	4	5	5	8	8	8	4	5	5	1	1	1	0	0	0	65.1	65.1	17.8	17.089	152	152;103;196;47	1	50	0	82.873	65.1	65.1	65.1	34.2	40.1	40.1	1858500000	778670000	526800000	519930000
P31689	P31689	10	10	10	DnaJ homolog subfamily A member 1	DNAJA1		1	10	10	10	7	7	8	6	7	6	7	7	8	6	7	6	7	7	8	6	7	6	37.3	37.3	37.3	44.868	397	397	1	65	0	60.324	29.5	29.5	32.5	27.5	32.2	27.5	108250000	21771000	14321000	13275000
Q5JTH9;A0A087X1U8;A0A087X0G0;H7C1M8	Q5JTH9	24;3;2;1	24;3;2;1	24;3;2;1	RRP12-like protein	RRP12		4	24	24	24	15	17	18	4	10	4	15	17	18	4	10	4	15	17	18	4	10	4	23.4	23.4	23.4	143.7	1297	1297;176;106;64	1	75	0	62.792	14.4	14.9	17.8	5.2	9.8	5.3	72695000	27918000	18209000	21213000
O75643;B4E0P5	O75643	22;4	22;4	22;4	U5 small nuclear ribonucleoprotein 200 kDa helicase	SNRNP200		2	22	22	22	13	15	14	9	9	7	13	15	14	9	9	7	13	15	14	9	9	7	16.4	16.4	16.4	244.5	2136	2136;595	1	72	0	50.821	10	11.7	10.5	6.9	8.3	5.5	17298000	5976800	2590900	3765100
P62266;D6RD47;D6RDJ2;D6RIX0;D6R9I7	P62266;D6RD47	8;7;3;3;3	8;7;3;3;3	8;7;3;3;3	40S ribosomal protein S23	RPS23	;	5	8	8	8	6	7	7	6	8	8	6	7	7	6	8	8	6	7	7	6	8	8	49.7	49.7	49.7	15.807	143	143;134;55;85;123	1	54	0	26.245	48.3	49	49	41.3	49.7	49.7	969630000	262270000	161950000	175140000
Q9H9B4;D6RFI0;S4R2X2;D6RDG7;D6RAE9	Q9H9B4;D6RFI0	11;6;5;4;2	11;6;5;4;2	10;6;5;4;2	Sideroflexin-1	SFXN1	;	5	11	11	10	8	10	9	7	7	7	8	10	9	7	7	7	8	9	9	7	7	7	52.2	52.2	46.3	35.619	322	322;193;177;144;56	1	64	0	39.661	38.5	49.4	41.6	28.3	28.3	34.2	132410000	29078000	21217000	23686000
Q9Y2X7;A0A0C4DGN6;J3QRU8;J3QLH1;J3QQI0;J3QL89;K7EN79	Q9Y2X7;A0A0C4DGN6;J3QRU8	21;20;19;5;4;3;2	21;20;19;5;4;3;2	20;19;18;5;4;3;2	ARF GTPase-activating protein GIT1	GIT1	;;	7	21	21	20	0	0	0	18	15	20	0	0	0	18	15	20	0	0	0	17	14	19	46.6	46.6	44.7	84.34	761	761;747;694;228;149;177;173	1	68	0	57.528	0	0	0	37.7	31	45.6	169280000	0	0	0
A0A087WVQ6;Q00610;A0A087WX41;P53675;J3KS13;J3KSQ2;J3KRF5;F5H5N6;K7EJJ5	A0A087WVQ6;Q00610	21;21;5;5;3;1;1;1;1	21;21;5;5;3;1;1;1;1	21;21;5;5;3;1;1;1;1	Clathrin heavy chain;Clathrin heavy chain 1	CLTC	;	9	21	21	21	15	14	17	9	7	7	15	14	17	9	7	7	15	14	17	9	7	7	17.5	17.5	17.5	192.06	1679	1679;1675;1260;1640;612;122;131;169;222	1	73	0	54.486	13.1	12	14.5	7.7	6.6	6.9	24286000	7485500	5068600	5952500
P10809;E7EXB4;E7ESH4;C9JL25;C9JL19;C9JCQ4;C9J0S9	P10809	17;8;8;3;2;2;1	17;8;8;3;2;2;1	17;8;8;3;2;2;1	60 kDa heat shock protein, mitochondrial	HSPD1		7	17	17	17	10	11	10	12	8	8	10	11	10	12	8	8	10	11	10	12	8	8	41.7	41.7	41.7	61.054	573	573;221;234;175;83;94;58	1	68	0	82.312	26.5	31.1	25.5	30	19.4	19.4	49956000	11758000	10872000	7443200
P11177;C9J634;F8WF02	P11177;C9J634	12;8;5	12;8;5	12;8;5	Pyruvate dehydrogenase E1 component subunit beta, mitochondrial	PDHB	;	3	12	12	12	11	11	10	10	10	10	11	11	10	10	10	10	11	11	10	10	10	10	42.3	42.3	42.3	39.233	359	359;350;251	1	71	0	79.038	39.3	39.3	36.2	36.2	36.2	36.2	147250000	38240000	21407000	24749000
F8VVM2;Q00325;F8VZL5;F8VWR4;F8VWQ0	F8VVM2;Q00325	12;12;3;3;3	12;12;3;3;3	12;12;3;3;3	Phosphate carrier protein, mitochondrial	SLC25A3	;	5	12	12	12	10	10	10	10	9	10	10	10	10	10	9	10	10	10	10	10	9	10	42.3	42.3	42.3	36.161	324	324;362;153;154;156	1	65	0	35.777	28.4	28.4	28.4	39.8	31.8	38	539390000	125200000	83532000	89369000
CON__P02538;P02538	CON__P02538;P02538	30;30	14;14	2;2	Keratin, type II cytoskeletal 6A	KRT6A	;	2	30	14	2	25	22	23	24	24	24	12	12	11	10	9	10	2	2	2	2	1	1	46.6	25.9	3.5	60.044	564	564;564	1	64	0	53.26	41.7	39	39	37.1	35.6	37.1	291080000	79520000	44919000	46411000
CON__Q5D862;Q5D862	CON__Q5D862;Q5D862	12;12	12;12	12;12	Filaggrin-2	FLG2	;	2	12	12	12	8	8	6	11	8	9	8	8	6	11	8	9	8	8	6	11	8	9	9.9	9.9	9.9	248.07	2391	2391;2391	1	63	0	57.525	6.9	6.1	5.4	9.2	5.8	6.8	55021000	11746000	7380700	6293000
O95373;E9PLB2;E9PLJ0	O95373	13;2;1	13;2;1	13;2;1	Importin-7	IPO7		3	13	13	13	11	9	9	8	7	8	11	9	9	8	7	8	11	9	9	8	7	8	18.9	18.9	18.9	119.52	1038	1038;130;64	1	62	0	45.849	15.2	12.9	11.4	10.2	9.2	10.2	37067000	10107000	6395000	9546500
Q14974;J3KTM9;J3QR48;J3QKQ5;J3QRG4	Q14974;J3KTM9	14;8;5;2;1	14;8;5;2;1	14;8;5;2;1	Importin subunit beta-1	KPNB1	;	5	14	14	14	11	10	8	7	7	5	11	10	8	7	7	5	11	10	8	7	7	5	20.5	20.5	20.5	97.169	876	876;690;148;248;60	1	57	0	72.547	15.5	14.7	12	12.2	10.3	8.1	29585000	11524000	6478400	5201500
Q6P2Q9;I3L0J9;I3L3Z8	Q6P2Q9	27;10;3	27;10;3	27;10;3	Pre-mRNA-processing-splicing factor 8	PRPF8		3	27	27	27	12	16	14	7	4	7	12	16	14	7	4	7	12	16	14	7	4	7	17.7	17.7	17.7	273.6	2335	2335;1012;250	1	60	0	45.371	7.7	11.3	10.4	5.7	4.1	4.6	16550000	5061500	3998000	3847000
Q9Y2X3;H7BZ72	Q9Y2X3	9;2	9;2	9;2	Nucleolar protein 58	NOP58		2	9	9	9	8	9	7	6	7	6	8	9	7	6	7	6	8	9	7	6	7	6	27.2	27.2	27.2	59.578	529	529;187	1	63	0	48.384	23.4	27.2	20.8	17.8	21.6	17.8	61068000	19139000	14716000	7857300
Q9Y3Z3	Q9Y3Z3	15	15	15	Deoxynucleoside triphosphate triphosphohydrolase SAMHD1	SAMHD1		1	15	15	15	7	10	8	9	13	8	7	10	8	9	13	8	7	10	8	9	13	8	30	30	30	72.2	626	626	1	64	0	78.329	14.2	21.7	16.9	20.1	25.2	16	47361000	7592400	6245600	6307700
E7ETK0;A0A087WUS0;P62847	E7ETK0;A0A087WUS0;P62847	5;5;5	5;5;5	5;5;5	40S ribosomal protein S24	RPS24	;;	3	5	5	5	5	5	5	5	5	5	5	5	5	5	5	5	5	5	5	5	5	5	35.9	35.9	35.9	15.197	131	131;132;133	1	53	0	20.249	35.9	35.9	35.9	35.9	35.9	35.9	491840000	105140000	73927000	81491000
P46783;F6U211;S4R435;Q9NQ39	P46783;F6U211;S4R435	5;4;4;2	5;4;4;2	5;4;4;2	40S ribosomal protein S10	RPS10;RPS10-NUDT3	;;	4	5	5	5	4	4	4	5	5	3	4	4	4	5	5	3	4	4	4	5	5	3	38.2	38.2	38.2	18.898	165	165;172;286;176	1	35	0	24.185	29.1	29.1	29.1	38.2	38.2	23.6	301310000	52531000	38884000	38458000
O14974;F8VZN8;H0YIS4;H0YHI8;F8VW28;H0YHL8;H0YIS3;H0YIM2;A0A0U1RQZ1;H0YIL7	O14974;F8VZN8	23;16;6;6;5;5;5;4;3;1	23;16;6;6;5;5;5;4;3;1	22;16;6;6;5;5;5;4;3;1	Protein phosphatase 1 regulatory subunit 12A	PPP1R12A	;	10	23	23	22	21	21	17	0	0	0	21	21	17	0	0	0	20	20	16	0	0	0	25.9	25.9	25	115.28	1030	1030;692;299;367;97;210;234;188;100;161	1	62	0	146.52	25.8	21.9	19.2	0	0	0	121280000	56364000	32778000	32141000
P62829;J3KT29;J3KTJ3;C9JD32;B9ZVP7;J3QQT9	P62829;J3KT29;J3KTJ3;C9JD32	8;6;5;4;3;1	8;6;5;4;3;1	8;6;5;4;3;1	60S ribosomal protein L23	RPL23	;;;	6	8	8	8	5	5	5	5	5	6	5	5	5	5	5	6	5	5	5	5	5	6	64.3	64.3	64.3	14.865	140	140;122;81;91;114;34	1	54	0	23.859	43.6	50.7	43.6	50.7	50	52.1	571380000	96060000	64678000	68240000
Q9NRZ9;F6XU50;A0A087WSW7;A0A0B4J1V9;Q9NW36;B1ALG6	Q9NRZ9;F6XU50;A0A087WSW7;A0A0B4J1V9	18;17;16;16;6;3	18;17;16;16;6;3	18;17;16;16;6;3	Lymphoid-specific helicase	HELLS	;;;	6	18	18	18	14	11	13	7	7	10	14	11	13	7	7	10	14	11	13	7	7	10	24.3	24.3	24.3	97.073	838	838;714;700;884;310;192	1	64	0	38.217	19	16	18.7	10.5	8.4	12.6	39106000	12361000	6304500	8228400
P07197;E7ESP9;E7EMV2	P07197;E7ESP9;E7EMV2	26;25;21	25;24;20	23;22;18	Neurofilament medium polypeptide	NEFM	;;	3	26	25	23	2	0	1	20	19	23	2	0	1	19	18	22	2	0	1	17	16	20	40.3	39.3	37.2	102.47	916	916;877;698	1	73	0	93.411	2.8	0	1.1	33.3	30.3	36.5	88838000	1540500	0	570940
P22695;H3BSJ9;H3BRG4;H3BP04;H3BUE4;H3BUI9	P22695;H3BSJ9;H3BRG4	11;10;10;4;2;2	11;10;10;4;2;2	11;10;10;4;2;2	Cytochrome b-c1 complex subunit 2, mitochondrial	UQCRC2	;;	6	11	11	11	7	8	6	9	9	7	7	8	6	9	9	7	7	8	6	9	9	7	40.6	40.6	40.6	48.442	453	453;336;412;176;116;132	1	61	0	42.635	30.2	34	22.7	36.9	32.9	30.2	79774000	20452000	12606000	11979000
P62913;Q5VVC8;Q5VVC9	P62913;Q5VVC8;Q5VVC9	10;8;6	10;8;6	10;8;6	60S ribosomal protein L11	RPL11	;;	3	10	10	10	7	6	6	9	7	9	7	6	6	9	7	9	7	6	6	9	7	9	60.1	60.1	60.1	20.252	178	178;174;131	1	51	0	45.759	40.4	39.9	40.4	55.6	51.1	55.6	397740000	89957000	63515000	50569000
P63173;J3KT73;J3QL01;J3KSP2	P63173;J3KT73;J3QL01	7;6;6;3	7;6;6;3	7;6;6;3	60S ribosomal protein L38	RPL38	;;	4	7	7	7	6	5	5	5	6	6	6	5	5	5	6	6	6	5	5	5	6	6	54.3	54.3	54.3	8.2178	70	70;64;67;21	1	45	0	48.872	50	50	50	50	54.3	54.3	675270000	149880000	97520000	103890000
Q8N163;G3V119;H0YB24;E5RHJ4;H0YC69;E5RFJ3;H0YC58;E5RGU7	Q8N163;G3V119;H0YB24	16;9;9;6;3;3;3;2	16;9;9;6;3;3;3;2	13;6;6;6;3;3;3;2	Cell cycle and apoptosis regulator protein 2	CCAR2	;;	8	16	16	13	12	12	12	8	8	9	12	12	12	8	8	9	9	10	9	5	6	7	28.7	28.7	24.3	102.9	923	923;598;615;277;148;162;183;150	1	61	0	49.444	17.4	22.3	19.2	12.9	13.9	17	80233000	23137000	16750000	15808000
Q5QPK2;H0Y368;O60762;Q5QPJ9	Q5QPK2;H0Y368;O60762;Q5QPJ9	13;13;13;9	13;13;13;9	13;13;13;9	Dolichol-phosphate mannosyltransferase subunit 1	DPM1	;;;	4	13	13	13	4	7	5	10	10	9	4	7	5	10	10	9	4	7	5	10	10	9	50.5	50.5	50.5	32.426	287	287;295;260;221	1	52	0	62.465	17.1	34.1	18.1	38	42.9	40.1	90486000	4147700	6277000	4997300
P16615;H7C5W9;O14983;Q93084;J3QSY6	P16615;H7C5W9	16;14;7;3;1	16;14;7;3;1	16;14;7;3;1	Sarcoplasmic/endoplasmic reticulum calcium ATPase 2	ATP2A2	;	5	16	16	16	13	9	9	9	9	7	13	9	9	9	9	7	13	9	9	9	9	7	20	20	20	114.76	1042	1042;933;1001;1043;50	1	61	0	81.319	15.6	11.2	11.1	12.8	12	9.4	71963000	24594000	13182000	12016000
Q14498;G3XAC6;H0Y4X3;A0A0U1RQH7;Q5QP23;Q5QP22;A0A0U1RQW2;F8WF24;F2Z3E6;F2Z2Z5;F8WF73;A8MYG5;G3V5Z6;H0YJJ3;G3XAP0;Q86U06;A0A087X122;G3V546	Q14498;G3XAC6;H0Y4X3;A0A0U1RQH7;Q5QP23	13;12;10;8;7;5;4;2;2;2;2;2;2;2;2;2;1;1	13;12;10;8;7;5;4;2;2;2;2;2;2;2;2;2;1;1	13;12;10;8;7;5;4;2;2;2;2;2;2;2;2;2;1;1	RNA-binding protein 39	RBM39	;;;;	18	13	13	13	5	3	8	12	11	12	5	3	8	12	11	12	5	3	8	12	11	12	31.5	31.5	31.5	59.379	530	530;423;336;245;231;193;163;39;40;47;62;95;189;214;269;439;59;114	1	59	0	69.062	14	8.3	18.9	30	26.8	28.7	103910000	6943900	2492400	6051100
Q9UBX3;B4DLN1;F6RGN5;I3L1E8	Q9UBX3;B4DLN1;F6RGN5	9;8;7;4	9;8;7;4	9;8;7;4	Mitochondrial dicarboxylate carrier	SLC25A10	;;	4	9	9	9	7	6	7	8	8	8	7	6	7	8	8	8	7	6	7	8	8	8	37.3	37.3	37.3	31.282	287	287;442;406;113	1	57	0	52.372	31	28.2	31	34.5	34.5	34.5	101080000	16819000	10305000	12602000
P42285;H0YAC4;D6REC7	P42285	18;1;1	18;1;1	18;1;1	Superkiller viralicidic activity 2-like 2	SKIV2L2		3	18	18	18	15	14	16	3	2	3	15	14	16	3	2	3	15	14	16	3	2	3	23.4	23.4	23.4	117.8	1042	1042;72;89	1	54	0	62.536	20.2	19.5	19.1	6	3.9	6	36180000	15296000	8018600	12357000
Q02878;F8VZ45;U3KQR5;F8VR69;F8VZA3;F8VWR1;F8VU16	Q02878	12;2;2;1;1;1;1	12;2;2;1;1;1;1	12;2;2;1;1;1;1	60S ribosomal protein L6	RPL6		7	12	12	12	11	8	10	3	4	4	11	8	10	3	4	4	11	8	10	3	4	4	39.2	39.2	39.2	32.728	288	288;159;160;63;105;118;120	1	51	0	38.044	36.5	31.2	39.2	12.2	18.1	18.1	73509000	32996000	16888000	18388000
Q9Y3C1;D6RIC3;A0A0C4DGU5;A0A087X2G6;D6RC60;A0A087WU10	Q9Y3C1;D6RIC3;A0A0C4DGU5;A0A087X2G6	9;7;7;7;2;1	9;7;7;7;2;1	9;7;7;7;2;1	Nucleolar protein 16	NOP16	;;;	6	9	9	9	8	7	7	7	7	7	8	7	7	7	7	7	8	7	7	7	7	7	51.1	51.1	51.1	21.188	178	178;150;231;237;95;70	1	59	0	52.856	47.2	41	41	47.2	47.2	39.3	159050000	58336000	32087000	26068000
P62701;C9JEH7;P22090;Q8TD47	P62701;C9JEH7;P22090	11;6;6;5	11;6;6;5	11;6;6;5	40S ribosomal protein S4, X isoform;40S ribosomal protein S4, Y isoform 1	RPS4X;RPS4Y1	;;	4	11	11	11	8	7	9	8	8	7	8	7	9	8	8	7	8	7	9	8	8	7	41.1	41.1	41.1	29.597	263	263;262;263;263	1	53	0	44.186	34.2	26.6	33.1	29.7	29.3	25.5	156880000	35286000	20813000	25439000
Q16352	Q16352	23	20	20	Alpha-internexin	INA		1	23	20	20	0	0	0	19	19	21	0	0	0	16	16	18	0	0	0	16	16	18	54.7	49.1	49.1	55.39	499	499	1	57	0	87.058	0	0	0	49.9	49.9	45.1	84440000	0	0	0
F8W7R3;Q9NVI1;H3BP78;H3BN35;H3BMG4;H3BQE2;H3BT54;H3BS60	F8W7R3;Q9NVI1;H3BP78	14;14;12;3;3;2;2;1	14;14;12;3;3;2;2;1	14;14;12;3;3;2;2;1	Fanconi anemia group I protein	FANCI	;;	8	14	14	14	11	11	11	5	4	3	11	11	11	5	4	3	11	11	11	5	4	3	18.2	18.2	18.2	123.24	1095	1095;1328;1090;145;226;157;215;125	1	51	0	35.215	16.2	14.7	15.3	7.9	6.1	3.7	9531600	3815000	2101400	2504600
P84077;P61204;F5H423;F5H0C7;H0YGG7	P84077;P61204;F5H423;F5H0C7	9;9;8;5;1	9;9;8;5;1	4;4;3;1;1	ADP-ribosylation factor 1;ADP-ribosylation factor 3	ARF1;ARF3	;;;	5	9	9	4	8	7	9	8	7	8	8	7	9	8	7	8	3	2	4	4	4	3	54.7	54.7	26	20.697	181	181;181;210;102;62	1	55	0	44.605	47	47	54.7	54.7	54.7	47	111880000	26354000	15094000	18330000
E9PLK3;P55786;A6NEC2;E9PP11;E9PJY4;E9PPD4;H0YDG0;H0YCQ5;E9PJF9;E9PPZ2	E9PLK3;P55786	17;17;6;4;2;2;2;1;1;1	17;17;6;4;2;2;2;1;1;1	17;17;6;4;2;2;2;1;1;1	Puromycin-sensitive aminopeptidase	NPEPPS	;	10	17	17	17	13	10	13	5	7	6	13	10	13	5	7	6	13	10	13	5	7	6	25.5	25.5	25.5	102.99	915	915;919;478;201;141;163;169;65;134;178	1	54	0	70.341	19.5	15.2	18.9	8	11.5	8.6	31109000	11011000	4464500	8287500
J3KTA4;P17844;J3QSF1;J3QRQ7;J3KRX8;X6RLV5;J3QR02;J3QRN5	J3KTA4;P17844	14;14;4;4;3;2;2;1	14;14;4;4;3;2;2;1	10;10;2;4;3;2;2;1	Probable ATP-dependent RNA helicase DDX5	DDX5	;	8	14	14	10	10	8	9	11	7	10	10	8	9	11	7	10	6	5	6	8	4	7	26.2	26.2	19.4	69.086	614	614;614;153;212;120;96;99;65	1	55	0	25.566	18.6	13.7	16.9	20	11.2	20.2	92767000	17726000	9622500	11167000
P60842;J3KT12;J3QL43;J3QS69;J3KTB5;J3QR64;J3QLN6;J3QKZ9;J3KS25;J3KSZ0;E7EQG2;Q14240;J3KTN0;J3KS93;J3KSN7;J3QL52;J3KT04;J3QQP0;E7EMV8;E9PBH4;F8WE11;I3L3H2	P60842;J3KT12;J3QL43;J3QS69;J3KTB5;J3QR64;J3QLN6	15;13;11;11;10;9;8;7;7;7;7;7;4;3;3;2;2;2;2;1;1;1	15;13;11;11;10;9;8;7;7;7;7;7;4;3;3;2;2;2;2;1;1;1	13;11;9;9;9;8;7;6;6;6;5;5;3;2;2;1;1;1;1;0;0;0	Eukaryotic initiation factor 4A-I	EIF4A1	;;;;;;	22	15	15	13	8	4	9	9	12	12	8	4	9	9	12	12	7	4	7	8	11	10	54.2	54.2	48.3	46.153	406	406;341;271;300;257;214;163;134;187;230;362;407;117;85;109;68;85;95;98;96;97;125	1	56	0	43.558	22.9	11.6	26.8	28.8	38.4	41.4	66804000	10176000	4143900	7493900
Q14257;A8MXP8;H0YL43	Q14257;A8MXP8;H0YL43	10;6;5	10;6;5	10;6;5	Reticulocalbin-2	RCN2	;;	3	10	10	10	9	8	8	10	7	8	9	8	8	10	7	8	9	8	8	10	7	8	61.2	61.2	61.2	36.876	317	317;216;155	1	54	0	49.428	55.2	47	51.7	61.2	44.2	47.6	86360000	15291000	9540200	13614000
B1ALK7;Q14155;E7EUY6;E9PDQ5;E7EU80;C9JDI6;B1ANY6;C9JAD7;F6SJA5;E7ENL8	B1ALK7;Q14155;E7EUY6	21;14;13;10;4;3;3;2;2;2	21;14;13;10;4;3;3;2;2;2	17;11;12;8;3;2;2;2;2;1	Rho guanine nucleotide exchange factor 7	ARHGEF7	;;	10	21	21	17	0	0	0	14	17	16	0	0	0	14	17	16	0	0	0	11	14	13	37.2	37.2	33.2	79.831	705	705;803;447;547;151;61;66;39;130;143	1	52	0	181.94	0	0	0	27.9	31.5	28.2	96203000	0	0	0
Q9BQG0;I3L1L3;I3L2H8	Q9BQG0;I3L1L3	20;17;2	20;17;2	20;17;2	Myb-binding protein 1A	MYBBP1A	;	3	20	20	20	15	17	13	4	3	3	15	17	13	4	3	3	15	17	13	4	3	3	22.7	22.7	22.7	148.85	1328	1328;1252;204	1	57	0	38.961	18.8	19.5	13	5.1	4.2	3.8	24474000	9836200	7520600	4952400
A0A087WXM6;J3QQT2;J3KRX5;A0A0A6YYL6;P18621;J3QLC8;A0A0A0MRF8;J3KRB3;A0A087WWH0;J3QS96;A0A087WY81;J3KSJ0	A0A087WXM6;J3QQT2;J3KRX5;A0A0A6YYL6;P18621;J3QLC8;A0A0A0MRF8;J3KRB3;A0A087WWH0;J3QS96;A0A087WY81	8;8;8;8;8;7;7;6;6;6;5;2	8;8;8;8;8;7;7;6;6;6;5;2	8;8;8;8;8;7;7;6;6;6;5;2	60S ribosomal protein L17	RPL17;RPL17-C18orf32	;;;;;;;;;;	12	8	8	8	6	6	8	6	6	6	6	6	8	6	6	6	6	6	8	6	6	6	40.8	40.8	40.8	19.586	169	169;171;174;228;184;174;190;129;131;138;97;56	1	43	0	33.562	34.9	40.2	40.8	40.2	40.2	36.1	357190000	86121000	73206000	53701000
P15880;E9PQD7;H0YEN5;E9PMM9;E9PPT0;I3L404;E9PM36;H3BNG3;H0YE27	P15880;E9PQD7;H0YEN5;E9PMM9	9;8;7;5;4;3;2;1;1	9;8;7;5;4;3;2;1;1	9;8;7;5;4;3;2;1;1	40S ribosomal protein S2	RPS2	;;;	9	9	9	9	8	9	7	7	7	8	8	9	7	7	7	8	8	9	7	7	7	8	38.6	38.6	38.6	31.324	293	293;235;195;218;197;155;209;44;63	1	49	0	51.595	35.8	38.6	32.1	32.1	32.1	34.8	179780000	48510000	33153000	29932000
P20700;E9PBF6;A0A0D9SFE5;A0A0D9SFY5;A0A0C4DGC5	P20700;E9PBF6;A0A0D9SFE5	19;16;12;6;1	19;16;12;6;1	18;15;12;6;0	Lamin-B1	LMNB1	;;	5	19	19	18	13	18	14	1	1	2	13	18	14	1	1	2	13	17	13	1	1	2	42.3	42.3	41	66.408	586	586;387;329;166;260	1	54	0	102.44	28.7	40.3	30	2.4	2.4	4.3	67267000	26056000	20586000	18161000
O00567;Q5JXT2;H0Y653;H0YDU4	O00567;Q5JXT2	13;8;3;3	13;8;3;3	13;8;3;3	Nucleolar protein 56	NOP56	;	4	13	13	13	10	8	9	6	6	6	10	8	9	6	6	6	10	8	9	6	6	6	24.7	24.7	24.7	66.049	594	594;281;219;252	1	50	0	46.078	20.5	19.2	20.9	15.2	13.8	14.1	21046000	6459700	4151600	5902600
P53007;B4DP62	P53007;B4DP62	8;5	8;5	8;5	Tricarboxylate transport protein, mitochondrial	SLC25A1	;	2	8	8	8	8	8	7	6	6	6	8	8	7	6	6	6	8	8	7	6	6	6	33.8	33.8	33.8	34.012	311	311;208	1	47	0	25.449	33.8	33.8	31.2	26	26	26	87070000	19606000	12195000	10197000
Q9NNW5;A0A087X295;E9PDU5;E9PBK6;C9K020;Q6PKC6;C9JFP6;V9GYU1;V9GZ65;E5RFX3;F8WE36	Q9NNW5;A0A087X295;E9PDU5;E9PBK6	16;15;14;9;4;3;2;2;1;1;1	16;15;14;9;4;3;2;2;1;1;1	16;15;14;9;4;3;2;2;1;1;1	WD repeat-containing protein 6	WDR6	;;;	11	16	16	16	8	10	7	7	8	9	8	10	7	7	8	9	8	10	7	7	8	9	20.2	20.2	20.2	121.72	1121	1121;1151;1070;569;271;289;99;125;35;61;68	1	51	0	28.32	8.7	12.8	10.4	10.8	12.5	11.2	23232000	4041200	3617400	2918300
P36542	P36542	7	7	7	ATP synthase subunit gamma, mitochondrial	ATP5C1		1	7	7	7	7	7	6	7	7	6	7	7	6	7	7	6	7	7	6	7	7	6	30.9	30.9	30.9	32.996	298	298	1	48	0	29.528	30.9	30.9	27.5	30.9	30.9	27.5	181520000	42613000	25018000	21560000
P36578;H3BM89;H3BU31;H3BTP7	P36578;H3BM89;H3BU31	10;6;5;4	10;6;5;4	10;6;5;4	60S ribosomal protein L4	RPL4	;;	4	10	10	10	7	8	8	6	6	7	7	8	8	6	6	7	7	8	8	6	6	7	27.6	27.6	27.6	47.697	427	427;333;171;170	1	50	0	23.139	20.8	22.7	23.4	17.8	18.5	20.1	140120000	39909000	24362000	34083000
P46778;G3V1B3;M0R181	P46778	7;3;3	7;3;3	7;3;3	60S ribosomal protein L21	RPL21		3	7	7	7	6	7	7	4	5	5	6	7	7	4	5	5	6	7	7	4	5	5	33.8	33.8	33.8	18.565	160	160;87;122	1	47	0	24.632	33.1	33.8	33.8	31.9	32.5	32.5	327580000	104680000	68633000	62393000
P62244;I3L3P7;I3L246;H3BN98;H3BV27;H3BT37;I3L303	P62244;I3L3P7;I3L246;H3BN98	6;4;4;4;2;2;2	6;4;4;4;2;2;2	6;4;4;4;2;2;2	40S ribosomal protein S15a	RPS15A	;;;	7	6	6	6	5	5	5	6	6	6	5	5	5	6	6	6	5	5	5	6	6	6	45.4	45.4	45.4	14.839	130	130;100;111;237;49;50;52	1	41	0	27.963	44.6	44.6	44.6	45.4	45.4	45.4	364830000	71319000	43398000	43413000
Q07021;I3L3Q7;I3L3B0	Q07021;I3L3Q7;I3L3B0	6;5;5	6;5;5	6;5;5	Complement component 1 Q subcomponent-binding protein, mitochondrial	C1QBP	;;	3	6	6	6	6	6	6	5	6	5	6	6	6	5	6	5	6	6	6	5	6	5	41.8	41.8	41.8	31.362	282	282;177;178	1	46	0	55.624	41.8	41.8	41.8	37.2	41.8	37.2	80770000	23959000	15615000	15574000
Q14739;C9JXK0;C9JES9	Q14739;C9JXK0	10;7;3	10;7;3	10;7;3	Lamin-B receptor	LBR	;	3	10	10	10	7	8	7	7	8	7	7	8	7	7	8	7	7	8	7	7	8	7	19.7	19.7	19.7	70.702	615	615;213;51	1	44	0	58.601	15.1	15.4	15.1	16.7	18	15.1	85580000	21957000	14571000	14431000
Q5SW79;H0Y2V6;H0Y4T4;E7EWM2;E7EMW0;E5RG47;Q96L14;E5RGW7;H0YB92;E5RIH6;E5RJT5;E5RFU8	Q5SW79;H0Y2V6	19;18;4;4;4;3;3;2;2;1;1;1	19;18;4;4;4;3;3;2;2;1;1;1	19;18;4;4;4;3;3;2;2;1;1;1	Centrosomal protein of 170 kDa	CEP170	;	12	19	19	19	1	1	0	15	16	13	1	1	0	15	16	13	1	1	0	15	16	13	15.7	15.7	15.7	175.29	1584	1584;1558;263;293;320;175;293;103;173;88;111;133	1	48	0	145.68	1.3	0.9	0	12.6	13.4	10.2	28398000	197830	36452	0
A0A0C4DGS1;P39656;U3KQ84	A0A0C4DGS1;P39656	12;12;5	12;12;5	12;12;5	Dolichyl-diphosphooligosaccharide--protein glycosyltransferase 48 kDa subunit	DDOST	;	3	12	12	12	10	10	11	4	7	4	10	10	11	4	7	4	10	10	11	4	7	4	41.9	41.9	41.9	48.799	439	439;456;154	1	46	0	41.779	36.9	37.6	40.1	21	30.1	21	45832000	16693000	11600000	10437000
E9PC15;Q53H12;E9PG39;A0A0G2JLG5;A0A0G2JLD0	E9PC15;Q53H12;E9PG39;A0A0G2JLG5	8;8;6;4;2	8;8;6;4;2	8;8;6;4;2	Acylglycerol kinase, mitochondrial	AGK	;;;	5	8	8	8	6	6	6	5	8	6	6	6	6	5	8	6	6	6	6	5	8	6	29.7	29.7	29.7	43.796	394	394;422;244;226;51	1	46	0	21.395	21.8	21.8	21.8	19	29.7	23.4	111080000	24522000	13092000	15763000
P16403;P16402;P22492;Q02539	P16403;P16402	6;5;2;2	6;5;2;2	1;0;0;0	Histone H1.2;Histone H1.3	HIST1H1C;HIST1H1D	;	4	6	6	1	6	6	6	5	6	5	6	6	6	5	6	5	1	1	1	1	1	1	23.5	23.5	7.5	21.364	213	213;221;207;215	1	43	0	15.047	23.5	23.5	23.5	23	23.5	23	353190000	106800000	69903000	75513000
P30837;H0YKF9;P47895	P30837	10;1;1	10;1;1	10;1;1	Aldehyde dehydrogenase X, mitochondrial	ALDH1B1		3	10	10	10	7	6	6	7	8	7	7	6	6	7	8	7	7	6	6	7	8	7	28	28	28	57.206	517	517;144;512	1	47	0	37.689	17.8	17.6	14.9	16.8	22.2	16.8	41141000	8181300	3529700	4369800
P62280;M0QZC5;M0R1H6;M0R1H5	P62280;M0QZC5	10;9;4;3	10;9;4;3	10;9;4;3	40S ribosomal protein S11	RPS11	;	4	10	10	10	7	7	6	8	6	7	7	7	6	8	6	7	7	7	6	8	6	7	44.3	44.3	44.3	18.431	158	158;118;88;79	1	45	0	19.996	38.6	37.3	33.5	38	27.8	37.3	500340000	97298000	77071000	47614000
CON__ENSEMBL:ENSBTAP00000024466;CON__ENSEMBL:ENSBTAP00000024462	CON__ENSEMBL:ENSBTAP00000024466;CON__ENSEMBL:ENSBTAP00000024462	6;6	6;6	6;6			;	2	6	6	6	5	4	3	4	5	4	5	4	3	4	5	4	5	4	3	4	5	4	21.7	21.7	21.7	43.9	401	401;419	1	40	0	23.703	17.7	17	10	14	20.9	17	374160000	81258000	55122000	47440000
Q15233;C9JYS8;H7C367;C9IZL7;C9J4X2	Q15233;C9JYS8;H7C367	11;7;6;4;2	11;7;6;4;2	10;7;5;3;2	Non-POU domain-containing octamer-binding protein	NONO	;;	5	11	11	10	6	5	6	6	6	6	6	5	6	6	6	6	5	5	5	6	6	6	29.5	29.5	27.8	54.231	471	471;247;234;207;124	1	42	0	29.271	16.1	12.5	14.4	16.6	16.8	19.1	30870000	7889700	3525200	4266600
CON__P02754	CON__P02754	10	10	10				1	10	10	10	7	8	7	5	5	5	7	8	7	5	5	5	7	8	7	5	5	5	66	66	66	18.281	162	162	1	41	0	33.097	48.1	52.5	56.8	47.5	47.5	47.5	117910000	37489000	28872000	23606000
P40227;Q92526;J3KRI6	P40227	12;4;1	12;4;1	12;4;1	T-complex protein 1 subunit zeta	CCT6A		3	12	12	12	8	8	7	3	6	3	8	8	7	3	6	3	8	8	7	3	6	3	33.1	33.1	33.1	58.024	531	531;530;128	1	39	0	27.761	23.5	25	23.7	10.4	18.8	10.4	15655000	5045100	4023200	3299600
P53618;E9PP73;E9PP63;E9PKQ1	P53618;E9PP73	12;7;1;1	12;7;1;1	12;7;1;1	Coatomer subunit beta	COPB1	;	4	12	12	12	8	7	6	6	6	7	8	7	6	6	6	7	8	7	6	6	6	7	17.5	17.5	17.5	107.14	953	953;485;132;137	1	43	0	25.074	12.5	10.2	10	9.2	8.1	8.8	19682000	7101900	3526000	2962700
R4GNG3;Q14161;F8WAK2;F8VXI9;F8W822	R4GNG3;Q14161;F8WAK2;F8VXI9	15;15;12;12;7	14;14;11;11;6	14;14;11;11;6	ARF GTPase-activating protein GIT2	GIT2	;;;	5	15	14	14	0	0	0	12	13	13	0	0	0	11	12	12	0	0	0	11	12	12	34.5	32.1	32.1	71.504	641	641;759;681;708;421	1	42	0	47.664	0	0	0	27.8	31.4	29.2	58251000	0	0	0
Q86VP6;A0A0C4DGH5;H0YH27;F5H6I6;F8WBB8	Q86VP6;A0A0C4DGH5	15;12;2;1;1	15;12;2;1;1	14;12;2;0;0	Cullin-associated NEDD8-dissociated protein 1	CAND1	;	5	15	15	14	9	13	10	2	2	2	9	13	10	2	2	2	9	12	10	2	2	2	19.4	19.4	18.6	136.37	1230	1230;770;442;54;110	1	39	0	39.765	12.3	16.3	11.6	2.7	2.7	2.7	15092000	5235500	5631400	3528400
A0A024R4M0;P46781;B5MCT8;C9JM19;F2Z3C0;A8MXK4	A0A024R4M0;P46781;B5MCT8;C9JM19	9;9;6;6;2;2	9;9;6;6;2;2	9;9;6;6;2;2	40S ribosomal protein S9	RPS9	;;;	6	9	9	9	7	7	9	5	7	7	7	7	9	5	7	7	7	7	9	5	7	7	35.1	35.1	35.1	22.591	194	194;194;139;156;77;79	1	44	0	16.36	26.3	27.3	35.1	22.7	27.3	27.3	118650000	31444000	18080000	23049000
E9PLL6;P46776;E9PJD9;E9PLX7	E9PLL6;P46776;E9PJD9	6;6;4;1	6;6;4;1	6;6;4;1	60S ribosomal protein L27a	RPL27A	;;	4	6	6	6	6	6	6	4	5	5	6	6	6	4	5	5	6	6	6	4	5	5	42.6	42.6	42.6	12.201	108	108;148;91;113	1	34	0	21.973	42.6	42.6	42.6	38	42.6	42.6	607680000	150040000	88275000	98402000
O00148;Q5STU3;Q13838;K7EQN7;F6WLT2;K7EPJ3;F6S4E6;A0A0A0MT12;F6TRA5;A0A140T9X3;A0A0G2JJZ9;A0A140T996;K7EN69;A0A140T9L4;A0A140T973;A0A140T9K1;A0A140T9X9;F6QYI9;A0A0G2JJL7;F6R6M7;F6UJC5;A0A140TA18;K7ENP6;A0A0G2JHN7;A0A0D9SEM9;K7EL56;K7EIL8;F6U6E2;F6S2B7;F6SXL5;H0Y400;A0A140T9K2;A0A140T9N3;H0YCC6	O00148;Q5STU3;Q13838;K7EQN7;F6WLT2;K7EPJ3;F6S4E6;A0A0A0MT12;F6TRA5;A0A140T9X3;A0A0G2JJZ9	10;7;7;6;6;5;5;5;5;5;5;4;3;3;3;3;3;3;3;3;3;3;2;2;2;2;2;2;2;2;2;1;1;1	10;7;7;6;6;5;5;5;5;5;5;4;3;3;3;3;3;3;3;3;3;3;2;2;2;2;2;2;2;2;2;1;1;1	10;7;7;6;6;5;5;5;5;5;5;4;3;3;3;3;3;3;3;3;3;3;2;2;2;2;2;2;2;2;2;1;1;1	ATP-dependent RNA helicase DDX39A;Spliceosome RNA helicase DDX39B	DDX39A;DDX39B	;;;;;;;;;;	34	10	10	10	7	6	5	7	6	8	7	6	5	7	6	8	7	6	5	7	6	8	25.8	25.8	25.8	49.129	427	427;425;428;255;289;189;231;235;238;325;328;189;130;131;135;138;179;187;187;197;245;247;92;95;96;108;125;125;132;136;187;64;97;141	1	44	0	18.656	18.7	17.8	15	19.4	14.5	19.2	81874000	19259000	12489000	5032400
Q5JR95;P62241	Q5JR95;P62241	8;8	8;8	8;8	40S ribosomal protein S8	RPS8	;	2	8	8	8	8	6	6	7	6	6	8	6	6	7	6	6	8	6	6	7	6	6	48.4	48.4	48.4	21.879	188	188;208	1	42	0	40.846	48.4	36.2	36.2	42	37.2	36.2	144900000	44086000	29871000	28879000
Q15149;E9PMV1;E9PIA2;E9PKG0	Q15149	22;4;1;1	22;4;1;1	21;4;1;1	Plectin	PLEC		4	22	22	21	3	1	2	13	13	12	3	1	2	13	13	12	2	0	1	13	13	12	6.6	6.6	6.1	531.78	4684	4684;703;174;190	1	44	0	35.302	1.5	0.4	0.7	3.6	3.7	3.1	12067000	779360	369880	754990
Q53GQ0;A0A1B0GV93;A0A1B0GVY6;E9PI21;A0A1B0GW85;A0A1B0GU83	Q53GQ0;A0A1B0GV93;A0A1B0GVY6	11;8;6;3;1;1	11;8;6;3;1;1	11;8;6;3;1;1	Very-long-chain 3-oxoacyl-CoA reductase	HSD17B12	;;	6	11	11	11	9	7	9	5	5	4	9	7	9	5	5	4	9	7	9	5	5	4	48.1	48.1	48.1	34.324	312	312;276;178;164;103;111	1	44	0	24.7	40.4	31.7	40.4	27.2	23.1	17.6	47687000	16985000	6892300	14610000
Q5TDF0;Q9BSD7	Q5TDF0;Q9BSD7	7;7	7;7	7;7	Cancer-related nucleoside-triphosphatase	NTPCR	;	2	7	7	7	4	4	4	6	5	4	4	4	4	6	5	4	4	4	4	6	5	4	44.7	44.7	44.7	25.072	228	228;190	1	43	0	32.722	27.2	27.2	23.7	39	32.9	27.2	41596000	5622800	3716800	4653700
Q96T76;H0Y746;Q5T454;H0Y7V3;H7C1W5;F8WCH8;B0QZ77;H7C0A9	Q96T76	13;6;5;2;2;2;2;1	13;6;5;2;2;2;2;1	13;6;5;2;2;2;2;1	MMS19 nucleotide excision repair protein homolog	MMS19		8	13	13	13	8	9	9	5	5	2	8	9	9	5	5	2	8	9	9	5	5	2	18.8	18.8	18.8	113.29	1030	1030;598;302;90;149;173;277;98	1	38	0	24.119	11	12.7	13.5	7.4	7.1	2.6	10786000	2833900	2725400	2290400
Q9Y4R8;H3BRS3;H3BU45	Q9Y4R8;H3BRS3	12;7;2	12;7;2	12;7;2	Telomere length regulation protein TEL2 homolog	TELO2	;	3	12	12	12	7	9	11	5	4	4	7	9	11	5	4	4	7	9	11	5	4	4	20.2	20.2	20.2	91.746	837	837;426;160	1	40	0	30.101	13.6	14.6	18.6	10.9	8.4	8.4	16016000	4435300	4733300	4285100
J3KR24;P41252;A0A0A0MSX9;Q5TCD1;Q5TCC6	J3KR24;P41252;A0A0A0MSX9	18;18;17;4;2	18;18;17;4;2	18;18;17;4;2	Isoleucine--tRNA ligase, cytoplasmic	IARS	;;	5	18	18	18	15	11	12	1	1	3	15	11	12	1	1	3	15	11	12	1	1	3	18.9	18.9	18.9	131.76	1152	1152;1262;1242;330;174	1	43	0	48.973	15.4	11.2	11.5	0.9	1.1	2.7	40209000	18859000	8648900	11526000
P42704;B8ZZ38;A0A0C4DG06;C9JCA9	P42704	12;4;4;3	12;4;4;3	12;4;4;3	Leucine-rich PPR motif-containing protein, mitochondrial	LRPPRC		4	12	12	12	8	9	8	3	4	3	8	9	8	3	4	3	8	9	8	3	4	3	11.3	11.3	11.3	157.9	1394	1394;504;531;359	1	38	0	49.797	8.6	8.3	7.5	3.9	4.7	3.4	9259400	2220500	3264100	2938800
Q14683;G8JLG1;H0Y7K8;V9GYN9;V9GY57	Q14683;G8JLG1	13;12;6;1;1	13;12;6;1;1	13;12;6;1;1	Structural maintenance of chromosomes protein 1A;Structural maintenance of chromosomes protein	SMC1A	;	5	13	13	13	4	4	5	7	9	6	4	4	5	7	9	6	4	4	5	7	9	6	11.2	11.2	11.2	143.23	1233	1233;1211;262;54;279	1	42	0	27.829	3.6	3.7	4.8	6.2	7.5	5	18207000	2664200	1993500	2433400
A0A087WXC5;E7ESZ7;O95299;C9J6X0;H7C2W5;H7C1Y7;H7C2X4;Q8N1B9	A0A087WXC5;E7ESZ7;O95299;C9J6X0	8;8;8;4;3;3;3;3	8;8;8;4;3;3;3;3	8;8;8;4;3;3;3;3	NADH dehydrogenase [ubiquinone] 1 alpha subcomplex subunit 10, mitochondrial	NDUFA10	;;;	8	8	8	8	5	6	6	7	7	6	5	6	6	7	7	6	5	6	6	7	7	6	33.5	33.5	33.5	40.836	355	355;390;355;244;129;133;138;201	1	41	0	33.022	21.4	25.6	29	27.3	27.3	25.6	33963000	5307500	4154200	4839000
E9PD53;Q9NTJ3;C9JR83;C9J9E4;C9JWF0;C9IYK2;C9JJ64;C9JVD8;C9J578	E9PD53;Q9NTJ3	15;15;5;2;2;2;2;1;1	15;15;5;2;2;2;2;1;1	15;15;5;2;2;2;2;1;1	Structural maintenance of chromosomes protein;Structural maintenance of chromosomes protein 4	SMC4	;	9	15	15	15	9	8	6	3	7	5	9	8	6	3	7	5	9	8	6	3	7	5	15.8	15.8	15.8	144.45	1263	1263;1288;423;157;170;173;180;119;139	1	40	0	40.226	8.2	7.4	5.4	3	9.3	4.8	15353000	4414700	3078800	2317500
P62140;C9J9S3;C9JP48;E7ETD8	P62140;C9J9S3;C9JP48;E7ETD8	12;7;7;7	12;7;7;7	5;3;3;2	Serine/threonine-protein phosphatase PP1-beta catalytic subunit;Serine/threonine-protein phosphatase	PPP1CB	;;;	4	12	12	5	10	9	6	3	3	2	10	9	6	3	3	2	3	5	2	0	0	0	45.9	45.9	23.9	37.186	327	327;125;138;169	1	40	0	48.773	34.3	36.7	20.8	12.8	12.8	9.5	71813000	27831000	17327000	15777000
P62263;H0YB22;E5RH77	P62263;H0YB22;E5RH77	7;6;6	7;6;6	7;6;6	40S ribosomal protein S14	RPS14	;;	3	7	7	7	4	5	7	6	7	7	4	5	7	6	7	7	4	5	7	6	7	7	39.1	39.1	39.1	16.273	151	151;120;134	1	41	0	20.117	36.4	37.7	39.1	39.1	39.1	39.1	187210000	32424000	22905000	22447000
A0A0D9SFB3;A0A0D9SG12;A0A0D9SF53;O00571;A0A0J9YVQ7;O15523;A0A087WVZ1	A0A0D9SFB3;A0A0D9SG12;A0A0D9SF53;O00571;A0A0J9YVQ7;O15523	10;10;10;10;5;5;3	9;9;9;9;5;4;3	9;9;9;9;5;4;3	ATP-dependent RNA helicase DDX3X;ATP-dependent RNA helicase DDX3Y	DDX3X;DDX3Y	;;;;;	7	10	9	9	8	7	7	7	5	7	7	6	6	6	4	6	7	6	6	6	4	6	20.9	19.2	19.2	70.839	640	640;647;733;662;164;660;138	1	37	0	39.393	17.3	15.2	15.2	14.2	10.8	14.4	14665000	3116600	1902300	1912700
E7EX90;Q14203;Q6AWB1;E7EWF7;C9J1B7;C9JZA4;C9JTE5;C9JJN7;C9JJD0;C9JKG6;E9PCY0	E7EX90;Q14203;Q6AWB1	14;14;7;5;1;1;1;1;1;1;1	14;14;7;5;1;1;1;1;1;1;1	14;14;7;5;1;1;1;1;1;1;1	Dynactin subunit 1	DCTN1;DKFZp686E0752	;;	11	14	14	14	10	8	7	6	5	4	10	8	7	6	5	4	10	8	7	6	5	4	15.9	15.9	15.9	139.09	1256	1256;1278;890;191;64;76;76;87;121;135;186	1	40	0	29.909	11.8	9.4	9	7.1	6.4	3.8	22664000	8554400	3301400	4923400
F8W7C6;A0A087WV22;X1WI28;P27635;H7C123;H7C2C5;Q96L21;H7C2U2;B8A6G2;A6QRI9	F8W7C6;A0A087WV22;X1WI28;P27635;H7C123;H7C2C5	8;7;7;7;5;5;3;1;1;1	8;7;7;7;5;5;3;1;1;1	8;7;7;7;5;5;3;1;1;1	60S ribosomal protein L10	RPL10	;;;;;	10	8	8	8	6	6	6	5	5	5	6	6	6	5	5	5	6	6	6	5	5	5	44.2	44.2	44.2	18.565	163	163;178;200;214;91;131;214;28;108;181	1	40	0	35.017	28.2	28.2	28.2	28.2	31.9	25.8	154340000	31963000	19945000	20414000
O95573;C9JC11;F5H062;F5GWH2;O60488	O95573	14;1;1;1;1	14;1;1;1;1	14;1;1;1;1	Long-chain-fatty-acid--CoA ligase 3	ACSL3		5	14	14	14	7	7	8	7	5	6	7	7	8	7	5	6	7	7	8	7	5	6	28.5	28.5	28.5	80.419	720	720;88;95;141;711	1	40	0	50.535	13.3	13.5	15.7	15	10.1	13.5	40109000	8142500	5065300	5992300
H7BYY1;F5H7S3;B7Z596;H0YK48;H0YL42;H0YN06	H7BYY1;F5H7S3;B7Z596;H0YK48	17;15;15;12;8;1	12;10;10;7;8;1	3;3;3;2;1;1		TPM1	;;;	6	17	12	3	17	15	16	0	0	1	12	10	11	0	0	0	3	3	3	0	0	0	57.3	46	13.7	28.747	248	248;245;275;248;108;49	1	40	0	47.449	57.3	53.6	54.4	0	0	4	107840000	45907000	32803000	29133000
P50402;Q5HY57;F8WEQ1	P50402;Q5HY57	10;7;1	10;7;1	10;7;1	Emerin	EMD	;	3	10	10	10	6	6	7	6	7	6	6	6	7	6	7	6	6	6	7	6	7	6	52.4	52.4	52.4	28.994	254	254;219;21	1	40	0	32.286	27.6	27.6	33.5	31.9	41.3	30.3	63402000	14945000	7843100	10367000
P50991	P50991	11	11	11	T-complex protein 1 subunit delta	CCT4		1	11	11	11	7	7	8	4	6	8	7	7	8	4	6	8	7	7	8	4	6	8	23.9	23.9	23.9	57.924	539	539	1	40	0	26.689	15	15	17.4	10	13.4	18.4	37501000	9224000	6741700	7022800
P62851	P62851	5	5	5	40S ribosomal protein S25	RPS25		1	5	5	5	5	5	5	5	5	5	5	5	5	5	5	5	5	5	5	5	5	5	29.6	29.6	29.6	13.742	125	125	1	37	0	11.891	29.6	29.6	29.6	29.6	29.6	29.6	320040000	85926000	58357000	56982000
A0A0B4J220;E9PLD3;E9PRG8	A0A0B4J220	8;2;2	8;2;2	8;2;2		C11orf98		3	8	8	8	6	7	8	5	5	4	6	7	8	5	5	4	6	7	8	5	5	4	46.3	46.3	46.3	14.234	123	123;99;122	1	39	0	20.371	46.3	40.7	46.3	40.7	40.7	39	208930000	46197000	42038000	31049000
O43592;F5GZM3;F8WDU6;F5GYW6	O43592	9;2;2;1	9;2;2;1	9;2;2;1	Exportin-T	XPOT		4	9	9	9	9	7	7	4	3	3	9	7	7	4	3	3	9	7	7	4	3	3	11.2	11.2	11.2	109.96	962	962;63;201;60	1	36	0	29.968	11.2	9	9.4	5.8	4	4	23042000	9525400	5014700	4883600
O75746;F8W9J0;H0YFB2;B4DGK6	O75746	15;2;2;2	11;2;2;2	11;2;2;2	Calcium-binding mitochondrial carrier protein Aralar1	SLC25A12		4	15	11	11	10	7	11	12	10	9	7	4	8	8	6	6	7	4	8	8	6	6	28.6	22.9	22.9	74.761	678	678;87;175;210	1	39	0	33.328	20.1	13.6	20.6	20.9	16.5	16.8	22260000	4784700	1617500	3717100
P22087;M0R299;M0QXL5;M0R0P1;M0R2Q4;M0R2U2;M0R1H0;M0R2B0	P22087;M0R299;M0QXL5;M0R0P1;M0R2Q4	8;7;7;6;6;2;2;2	8;7;7;6;6;2;2;2	7;6;6;5;5;2;2;2	rRNA 2-O-methyltransferase fibrillarin	FBL	;;;;	8	8	8	7	7	7	7	5	3	2	7	7	7	5	3	2	6	6	6	4	2	1	41.1	41.1	37.7	33.784	321	321;229;244;228;273;157;178;182	1	37	0	19.924	37.4	37.4	37.4	21.8	11.8	9.7	84171000	29689000	18645000	18211000
Q5SRE5;H7C4K7	Q5SRE5	10;1	10;1	10;1	Nucleoporin NUP188 homolog	NUP188		2	10	10	10	7	7	9	3	2	4	7	7	9	3	2	4	7	7	9	3	2	4	8.4	8.4	8.4	196.04	1749	1749;107	1	37	0	18.865	5.9	5.7	7.7	2.4	2.1	3.7	12261000	4135200	2625400	3438400
Q9BRT6	Q9BRT6	4	4	4	Protein LLP homolog	LLPH		1	4	4	4	4	3	4	3	3	3	4	3	4	3	3	3	4	3	4	3	3	3	29.5	29.5	29.5	15.225	129	129	1	32	0	15.025	29.5	23.3	29.5	23.3	23.3	23.3	307260000	126810000	38760000	57959000
Q9HAV4;E2QRM3;H0Y9I3	Q9HAV4	11;1;1	11;1;1	11;1;1	Exportin-5	XPO5		3	11	11	11	7	6	9	4	4	5	7	6	9	4	4	5	7	6	9	4	4	5	12.6	12.6	12.6	136.31	1204	1204;76;107	1	35	0	48.58	8.3	6.9	10	5.2	3.9	6.5	9687500	2388700	2303000	2533100
B4DR61;P61619;H7C1Q9;C9JXC6;H7C069;A6NK38;F2Z2C7;A6NIF9;C9JJV4	B4DR61;P61619	6;6;2;2;2;2;2;2;2	6;6;2;2;2;2;2;2;2	4;4;0;0;0;0;0;0;0	Protein transport protein Sec61 subunit alpha isoform 1	SEC61A1	;	9	6	6	4	3	3	3	5	6	5	3	3	3	5	6	5	2	2	3	4	4	4	19.9	19.9	12.9	52.949	482	482;476;94;101;145;159;162;168;189	1	34	0	16.099	13.7	13.7	10.8	18	19.9	18	21898000	853260	484910	3333700
O75964;E9PN17	O75964;E9PN17	7;6	7;6	7;6	ATP synthase subunit g, mitochondrial	ATP5L	;	2	7	7	7	5	6	6	5	4	4	5	6	6	5	4	4	5	6	6	5	4	4	70.9	70.9	70.9	11.428	103	103;76	1	33	0	23.333	38.8	62.1	47.6	69.9	46.6	33	67052000	18777000	9362700	12283000
P42677;Q5T4L4;H0YMV8;Q71UM5;C9JLI6;C9J1C5	P42677;Q5T4L4;H0YMV8;Q71UM5	6;5;3;3;2;1	6;5;3;3;2;1	6;5;3;3;2;1	40S ribosomal protein S27;40S ribosomal protein S27-like	RPS27;RPS27L	;;;	6	6	6	6	4	3	4	5	4	4	4	3	4	5	4	4	4	3	4	5	4	4	41.7	41.7	41.7	9.461	84	84;66;100;84;97;52	1	28	0	12.287	39.3	29.8	39.3	32.1	31	31	482040000	78333000	39370000	45454000
P48047;H7C0C1;H7C086;H7C068	P48047;H7C0C1	7;6;2;1	7;6;2;1	7;6;2;1	ATP synthase subunit O, mitochondrial	ATP5O	;	4	7	7	7	7	5	5	7	5	4	7	5	5	7	5	4	7	5	5	7	5	4	43.7	43.7	43.7	23.277	213	213;242;74;86	1	37	0	20.285	43.7	34.3	32.9	43.7	32.9	23.9	37928000	12025000	5539200	5046700
Q6P4A7	Q6P4A7	8	8	5	Sideroflexin-4	SFXN4		1	8	8	5	5	6	4	7	6	7	5	6	4	7	6	7	2	3	2	5	5	4	41.5	41.5	26.1	37.998	337	337	1	37	0	18.376	26.4	30.9	20.8	38.9	33.2	34.4	20705000	2572700	2643300	1993400
Q9ULX6;V9GZ50;M0R1Y5;M0R010;M0QYT7	Q9ULX6;V9GZ50	9;6;1;1;1	9;6;1;1;1	9;6;1;1;1	A-kinase anchor protein 8-like	AKAP8L	;	5	9	9	9	7	6	5	5	6	7	7	6	5	5	6	7	7	6	5	5	6	7	16.6	16.6	16.6	71.648	646	646;431;109;161;162	1	38	0	32.453	14.2	12.2	10.7	9.9	12.2	13.3	41405000	8265800	6909400	4044600
P07900;G3V2J8;Q14568;Q58FG0	P07900	21;5;5;2	11;2;1;1	11;2;1;1	Heat shock protein HSP 90-alpha	HSP90AA1		4	21	11	11	13	12	13	18	18	15	5	4	4	8	9	5	5	4	4	8	9	5	35.4	19.3	19.3	84.659	732	732;174;343;334	1	37	0	49.721	20.2	19.3	20.1	26.8	29.2	23.6	60416000	8586500	4838800	4287000
P46977;A0A0C4DH80;E9PN73;E9PI32	P46977	10;1;1;1	10;1;1;1	10;1;1;1	Dolichyl-diphosphooligosaccharide--protein glycosyltransferase subunit STT3A	STT3A		4	10	10	10	8	7	8	2	4	5	8	7	8	2	4	5	8	7	8	2	4	5	16	16	16	80.529	705	705;102;117;119	1	35	0	21.918	13.8	12.8	13.8	4	7.2	9.8	25224000	9041100	6136300	6214600
Q96CS3;D6RBG6	Q96CS3	8;1	8;1	8;1	FAS-associated factor 2	FAF2		2	8	8	8	6	4	7	6	5	4	6	4	7	6	5	4	6	4	7	6	5	4	29.2	29.2	29.2	52.623	445	445;48	1	33	0	19.953	18.7	14.6	22.7	25.2	18.7	14.6	41976000	9831700	4456200	7339700
Q9P0J0;B4DEZ3;K7EJE1;E7ENQ6;U3KQP3	Q9P0J0;B4DEZ3;K7EJE1;E7ENQ6	7;4;4;4;3	7;4;4;4;3	7;4;4;4;3	NADH dehydrogenase [ubiquinone] 1 alpha subcomplex subunit 13	NDUFA13	;;;	5	7	7	7	5	4	4	3	4	4	5	4	4	3	4	4	5	4	4	3	4	4	50.7	50.7	50.7	16.698	144	144;120;150;273;75	1	30	0	14.075	39.6	31.9	31.9	22.9	29.9	34	30108000	11092000	2599100	2226000
D6RG13;P61247;E9PFI5;H0Y9Y4;D6RAT0;H0Y8L7;D6RB09;D6R9B6;D6RI02;D6RED7;D6RAS7;D6RGE0	D6RG13;P61247;E9PFI5;H0Y9Y4;D6RAT0;H0Y8L7;D6RB09;D6R9B6	9;9;7;7;7;6;6;5;3;3;3;1	9;9;7;7;7;6;6;5;3;3;3;1	9;9;7;7;7;6;6;5;3;3;3;1	40S ribosomal protein S3a	RPS3A	;;;;;;;	12	9	9	9	7	5	9	3	4	4	7	5	9	3	4	4	7	5	9	3	4	4	42.6	42.6	42.6	25.608	223	223;264;205;208;227;190;193;145;95;101;125;65	1	36	0	39.913	33.6	23.8	42.6	12.6	20.2	20.2	76708000	27361000	13419000	18852000
E9PCY7;G8JLB6;P31943;D6RIU0;D6RBM0;E7EQJ0;D6RAM1;E5RGV0;D6R9T0;D6RFM3;D6RIT2;E7EN40;D6RDU3;D6RJ04;D6RIH9;H0YB39;D6RF17;D6RDL0;E5RGH4;E5RJ94;D6R9D3;H0YAQ2	E9PCY7;G8JLB6;P31943;D6RIU0;D6RBM0;E7EQJ0;D6RAM1;E5RGV0;D6R9T0;D6RFM3;D6RIT2;E7EN40;D6RDU3;D6RJ04;D6RIH9;H0YB39	6;6;6;4;4;3;3;3;3;3;3;3;3;3;3;3;2;2;2;1;1;1	6;6;6;4;4;3;3;3;3;3;3;3;3;3;3;3;2;2;2;1;1;1	2;2;2;2;2;2;2;1;2;2;2;2;2;2;2;0;2;2;0;1;1;0	Heterogeneous nuclear ribonucleoprotein H;Heterogeneous nuclear ribonucleoprotein H, N-terminally processed	HNRNPH1	;;;;;;;;;;;;;;;	22	6	6	2	5	4	5	5	4	4	5	4	5	5	4	4	2	0	1	1	0	0	19.3	19.3	5.4	47.087	429	429;472;449;168;212;115;130;155;161;163;164;166;171;172;184;277;49;84;100;28;40;131	1	36	0	78.808	17	14	16.1	17.2	14	14	72265000	12739000	9686000	10214000
J3KN16;Q5VYK3;R4GMY1	J3KN16;Q5VYK3;R4GMY1	13;13;8	13;13;8	13;13;8	Proteasome-associated protein ECM29 homolog	KIAA0368;ECM29	;;	3	13	13	13	8	11	6	3	2	2	8	11	6	3	2	2	8	11	6	3	2	2	9.6	9.6	9.6	223.69	2017	2017;1845;890	1	34	0	30.119	5.9	8.7	5.1	2.5	1.7	1.7	6848800	2796400	2483500	1167300
P04350;M0R278;M0QY85;M0QZL7;M0R0X0;M0QY37;M0QX14;M0R1I1	P04350	22;6;5;5;4;4;4;2	4;2;1;1;1;1;1;1	3;1;1;1;1;1;1;0	Tubulin beta-4A chain	TUBB4A		8	22	4	3	21	22	21	20	20	20	4	4	4	4	4	4	3	3	3	3	3	3	64.6	14.2	10.1	49.585	444	444;167;107;157;103;109;110;74	1	31	0	178.33	64.6	64.6	64.6	60.6	60.6	60.6	51573000	8150400	5453000	5625500
P17858	P17858	11	9	8	ATP-dependent 6-phosphofructokinase, liver type	PFKL		1	11	9	8	7	7	6	7	9	8	6	6	5	5	7	6	6	6	4	5	6	5	19.4	15.8	14.6	85.018	780	780	1	36	0	24.682	11.8	11.5	10.4	11.9	15.6	14.2	18237000	4234800	2837300	2982100
P61313;E7EQV9;E7ENU7;E7EX53;E7ERA2	P61313;E7EQV9;E7ENU7;E7EX53	8;7;6;5;2	8;7;6;5;2	8;7;6;5;2	60S ribosomal protein L15;Ribosomal protein L15	RPL15	;;;	5	8	8	8	7	5	4	3	4	4	7	5	4	3	4	4	7	5	4	3	4	4	42.2	42.2	42.2	24.146	204	204;174;175;133;59	1	31	0	16.27	35.3	25	20.6	20.6	21.6	21.6	34640000	13409000	10075000	5423600
Q9BUF5;K7ESM5;K7EL29;K7EN98;K7ESQ3;K7EQT3;K7EJ64;K7ERA8;K7EJZ4;K7ES63;K7EPE5	Q9BUF5;K7ESM5	18;14;5;4;3;3;3;3;3;3;3	7;3;4;4;3;3;3;3;3;1;3	7;3;4;4;3;3;3;3;3;1;3	Tubulin beta-6 chain	TUBB6	;	11	18	7	7	14	15	15	16	16	16	4	4	5	6	6	6	4	4	5	6	6	6	55.2	30.7	30.7	49.857	446	446;338;130;136;96;104;104;110;115;116;141	1	33	0	44.684	42.2	42.2	48	49.3	47.1	49.3	82283000	11535000	6954900	9635500
A0A0A0MRM9;Q14978;S4R402;S4R349	A0A0A0MRM9;Q14978	7;7;2;2	7;7;2;2	5;5;0;0	Nucleolar and coiled-body phosphoprotein 1	NOLC1	;	4	7	7	5	7	5	6	1	2	2	7	5	6	1	2	2	5	3	4	0	0	0	12.7	12.7	9.2	74.543	708	708;699;46;258	1	29	0	20.822	12.7	9.3	10.9	2.1	3.5	3.5	23769000	11161000	4239300	6733300
CON__P20930;P20930	CON__P20930;P20930	6;6	6;6	6;6	Filaggrin	FLG	;	2	6	6	6	5	4	5	4	4	4	5	4	5	4	4	4	5	4	5	4	4	4	1.4	1.4	1.4	435.16	4061	4061;4061	1	35	0	10.142	0.9	1.1	0.9	0.9	0.9	0.9	8658200	1670900	1276800	1573400
CON__Q8N1N4-2;CON__Q7RTT2;Q8N1N4	CON__Q8N1N4-2;CON__Q7RTT2;Q8N1N4	12;12;12	9;9;9	8;8;8	Keratin, type II cytoskeletal 78	KRT78	;;	3	12	9	8	7	6	6	9	9	9	6	5	5	6	6	6	6	4	4	5	5	5	23.4	18.6	16.5	56.964	521	521;521;520	1	34	0	26.368	14	13.1	11.5	16.9	17.7	17.7	25084000	5889800	3272600	3363400
F2Z388;P42766	F2Z388;P42766	4;4	4;4	4;4	60S ribosomal protein L35	RPL35	;	2	4	4	4	4	4	3	3	3	4	4	4	3	3	3	4	4	4	3	3	3	4	28.1	28.1	28.1	10.645	96	96;123	1	29	0	29.133	28.1	28.1	28.1	28.1	28.1	28.1	929250000	198250000	134280000	118990000
CON__P01966;G3V1N2;P69905	CON__P01966	5;2;2	5;2;2	5;2;2				3	5	5	5	4	4	5	5	4	5	4	4	5	5	4	5	4	4	5	5	4	5	63.4	63.4	63.4	15.184	142	142;110;142	1	33	0	13.667	52.1	52.1	63.4	63.4	52.1	63.4	65254000	14302000	8024300	11794000
H0YNH8;Q9BZF9;F5H2B9;H0YN48;H0YMI1	H0YNH8;Q9BZF9;F5H2B9	13;13;12;4;2	13;13;12;4;2	13;13;12;4;2	Uveal autoantigen with coiled-coil domains and ankyrin repeats	UACA	;;	5	13	13	13	10	11	10	0	0	0	10	11	10	0	0	0	10	11	10	0	0	0	11	11	11	161.31	1401	1401;1416;1307;564;225	1	34	0	42.035	9.1	9.6	9	0	0	0	19403000	8756900	5499600	5146500
O75489;E9PS48;E9PKL8;G3V194	O75489	8;2;1;1	8;2;1;1	8;2;1;1	NADH dehydrogenase [ubiquinone] iron-sulfur protein 3, mitochondrial	NDUFS3		4	8	8	8	5	7	7	5	5	5	5	7	7	5	5	5	5	7	7	5	5	5	42.4	42.4	42.4	30.241	264	264;161;77;121	1	34	0	19.202	25.4	36.7	36.7	25.4	26.9	26.1	18816000	4104900	3291800	4388700
P28288	P28288	11	11	11	ATP-binding cassette sub-family D member 3	ABCD3		1	11	11	11	8	8	7	3	3	5	8	8	7	3	3	5	8	8	7	3	3	5	19.1	19.1	19.1	75.475	659	659	1	34	0	27.791	12.6	12.6	14.1	6.1	5.3	9.4	46976000	19396000	12147000	8621000
P62854;Q5JNZ5	P62854;Q5JNZ5	3;2	3;2	3;2	40S ribosomal protein S26;Putative 40S ribosomal protein S26-like 1	RPS26;RPS26P11	;	2	3	3	3	3	3	3	3	2	3	3	3	3	3	2	3	3	3	3	3	2	3	27	27	27	13.015	115	115;115	1	23	0	14.822	27	27	27	27	20.9	27	1165900000	302150000	193200000	226490000
Q13885;Q9BVA1	Q13885;Q9BVA1	24;23	5;4	4;3	Tubulin beta-2A chain;Tubulin beta-2B chain	TUBB2A;TUBB2B	;	2	24	5	4	22	22	21	20	20	22	5	5	5	4	4	5	4	4	4	3	3	4	61.8	16.9	14.2	49.906	445	445;445	1	31	0	45.317	61.8	58	58	51.7	51.7	57.8	371710000	61471000	144460000	51900000
Q9NS69	Q9NS69	6	6	6	Mitochondrial import receptor subunit TOM22 homolog	TOMM22		1	6	6	6	5	6	6	2	3	3	5	6	6	2	3	3	5	6	6	2	3	3	66.2	66.2	66.2	15.521	142	142	1	32	0	44.033	48.6	66.2	66.2	22.5	40.1	40.1	64190000	17339000	13028000	16081000
D3YTB1;F8W727;P62910	D3YTB1;F8W727;P62910	8;8;8	8;8;8	8;8;8	60S ribosomal protein L32	RPL32	;;	3	8	8	8	4	4	7	5	6	4	4	4	7	5	6	4	4	4	7	5	6	4	41.4	41.4	41.4	15.616	133	133;153;135	1	33	0	29.361	34.6	27.1	41.4	28.6	33.8	27.8	179190000	28756000	19845000	26637000
O95425;A0A0J9YWY6	O95425;A0A0J9YWY6	16;8	16;8	16;8	Supervillin	SVIL	;	2	16	16	16	8	13	12	0	0	0	8	13	12	0	0	0	8	13	12	0	0	0	9	9	9	247.74	2214	2214;963	1	33	0	129.96	4.3	7.6	7.2	0	0	0	24655000	8144500	8781900	7728600
P12956;B1AHC9	P12956;B1AHC9	8;7	8;7	8;7	X-ray repair cross-complementing protein 6	XRCC6	;	2	8	8	8	7	8	6	4	3	2	7	8	6	4	3	2	7	8	6	4	3	2	17.7	17.7	17.7	69.842	609	609;559	1	32	0	19.282	15.9	17.7	12.6	9.7	7.7	3.3	13589000	5607900	3182400	3225500
Q9UHI6;E9PJ60	Q9UHI6	10;2	10;2	10;2	Probable ATP-dependent RNA helicase DDX20	DDX20		2	10	10	10	6	6	10	1	2	3	6	6	10	1	2	3	6	6	10	1	2	3	22	22	22	92.239	824	824;432	1	32	0	24.882	12.4	14.9	22	1.8	4.4	7.5	15412000	4580900	3620300	4379900
A8MUD9;P18124;C9JIJ5;C9JZ88	A8MUD9;P18124	7;7;2;1	7;7;2;1	7;7;2;1	60S ribosomal protein L7	RPL7	;	4	7	7	7	6	7	6	2	2	3	6	7	6	2	2	3	6	7	6	2	2	3	40.4	40.4	40.4	24.433	208	208;248;99;88	1	32	0	18.161	35.1	40.4	34.6	13	12.5	16.3	62873000	21675000	15797000	15673000
CON__Q3SX09;CON__P02070;E9PFT6;P68871;P02042	CON__Q3SX09;CON__P02070	6;3;1;1;1	6;3;1;1;1	6;3;1;1;1			;	5	6	6	6	6	5	4	5	4	4	6	5	4	5	4	4	6	5	4	5	4	4	32.3	32.3	32.3	22.06	201	201;145;141;147;147	1	32	0	37.892	32.3	31.3	26.9	27.9	26.9	27.9	31943000	8395800	4157400	4041800
D6RAA6;P57088;H0Y8N0;J3KN43;D6RBY2	D6RAA6;P57088	5;5;2;1;1	5;5;2;1;1	5;5;2;1;1	Transmembrane protein 33	TMEM33	;	5	5	5	5	5	4	4	4	4	4	5	4	4	4	4	4	5	4	4	4	4	4	21.2	21.2	21.2	25.223	222	222;247;155;68;68	1	25	0	27.371	21.2	18	18	18	18	18	63940000	16858000	9340600	9496500
J3KPX7;Q99623;F5GY37;F5H3X6;F5GWA7;F5H0C5;F5H2D2	J3KPX7;Q99623;F5GY37;F5H3X6;F5GWA7	10;10;9;7;7;3;2	10;10;9;7;7;3;2	10;10;9;7;7;3;2	Prohibitin-2	PHB2	;;;;	7	10	10	10	5	5	5	4	4	4	5	5	5	4	4	4	5	5	5	4	4	4	44.6	44.6	44.6	33.239	298	298;299;267;213;261;112;87	1	32	0	17.633	20.1	20.8	24.8	19.1	18.5	18.8	14837000	3497300	2852700	3235100
O00165;E9PIQ7;Q5VYD6	O00165;E9PIQ7	8;4;3	8;4;3	8;4;3	HCLS1-associated protein X-1	HAX1	;	3	8	8	8	6	4	6	3	3	3	6	4	6	3	3	3	6	4	6	3	3	3	51.6	51.6	51.6	31.62	279	279;151;255	1	25	0	22.479	44.1	26.5	39.1	15.1	22.6	22.6	21319000	10066000	3035300	5538500
Q16778;P33778;P23527;P06899;Q8N257;Q6DRA6;Q6DN03	Q16778;P33778;P23527;P06899;Q8N257	5;5;5;5;4;1;1	5;5;5;5;4;1;1	1;1;1;1;1;1;1	Histone H2B type 2-E;Histone H2B type 1-B;Histone H2B type 1-O;Histone H2B type 1-J;Histone H2B type 3-B	HIST2H2BE;HIST1H2BB;HIST1H2BO;HIST1H2BJ;HIST3H2BB	;;;;	7	5	5	1	4	4	5	1	1	2	4	4	5	1	1	2	0	0	1	0	0	0	41.3	41.3	7.9	13.92	126	126;126;126;126;126;164;193	1	25	0	47.273	33.3	33.3	41.3	11.9	11.9	19	132330000	33515000	41340000	45836000
P14868;C9J7S3;C9JLC1;H7BZ35;C9JQM9;H7C278	P14868	11;4;4;4;2;1	11;4;4;4;2;1	11;4;4;4;2;1	Aspartate--tRNA ligase, cytoplasmic	DARS		6	11	11	11	9	9	9	3	2	0	9	9	9	3	2	0	9	9	9	3	2	0	28.1	28.1	28.1	57.136	501	501;175;182;188;135;179	1	32	0	32.933	23.4	23.2	23.2	8.8	3.6	0	35543000	13356000	9879400	9335100
P26373;J3QSB4;H3BTH3;H3BUK8;J3KS98	P26373;J3QSB4	7;5;2;1;1	7;5;2;1;1	7;5;2;1;1	60S ribosomal protein L13	RPL13	;	5	7	7	7	6	6	6	4	4	5	6	6	6	4	4	5	6	6	6	4	4	5	34.1	34.1	34.1	24.261	211	211;126;63;54;78	1	31	0	40.995	29.9	29.4	29.4	19.9	19	24.2	142910000	38714000	30466000	28816000
P42695;E9PKK4;G3V1A9;E9PQA3;E9PLE0	P42695;E9PKK4;G3V1A9	6;5;5;1;1	6;5;5;1;1	6;5;5;1;1	Condensin-2 complex subunit D3	NCAPD3	;;	5	6	6	6	5	4	4	5	4	4	5	4	4	5	4	4	5	4	4	5	4	4	6.7	6.7	6.7	168.89	1498	1498;832;1084;194;264	1	30	0	13.001	4.6	3.3	3.9	5.7	3.3	3.3	3458700	751100	584590	293170
P53621	P53621	12	12	12	Coatomer subunit alpha;Xenin;Proxenin	COPA		1	12	12	12	8	9	6	1	4	6	8	9	6	1	4	6	8	9	6	1	4	6	14.5	14.5	14.5	138.34	1224	1224	1	36	0	26.595	8.6	10.1	6.6	1.1	5.7	6.6	15513000	4847900	4334300	2566700
Q93008;O00507	Q93008	11;2	11;2	11;2	Probable ubiquitin carboxyl-terminal hydrolase FAF-X	USP9X		2	11	11	11	7	7	8	2	2	2	7	7	8	2	2	2	7	7	8	2	2	2	7	7	7	292.28	2570	2570;2555	1	29	0	19.632	4.8	4.6	4.6	1	1.6	1	7661200	2730000	1763300	2271900
B5MDF5;P62826;F5H018;J3KQE5;H0YFC6;B4DV51;A0A087X0W0	B5MDF5;P62826;F5H018;J3KQE5;H0YFC6	6;6;5;5;3;2;1	6;6;5;5;3;2;1	6;6;5;5;3;2;1	GTP-binding nuclear protein Ran	RAN	;;;;	7	6	6	6	6	4	4	5	5	5	6	4	4	5	5	5	6	4	4	5	5	5	30.9	30.9	30.9	26.224	233	233;216;198;234;103;128;53	1	30	0	15.257	30.9	18.5	18.5	26.2	26.2	26.2	61156000	13844000	4112800	8628200
CON__P34955	CON__P34955	6	6	6				1	6	6	6	5	3	4	5	4	2	5	3	4	5	4	2	5	3	4	5	4	2	17.8	17.8	17.8	46.103	416	416	1	29	0	20.297	15.9	9.1	12.7	15.4	13.5	7.7	18090000	4040700	2409500	3285500
CON__Q04695;Q04695;F5GWP8;K7EPJ9;K7ESE1;CON__Q99PS0	CON__Q04695;Q04695;F5GWP8	19;19;15;9;3;1	8;8;5;4;1;1	2;2;1;2;0;0	Keratin, type I cytoskeletal 17	KRT17	;;	6	19	8	2	14	14	15	13	14	14	6	3	6	5	5	6	1	0	1	0	0	0	36.1	19.4	6.9	48.105	432	432;432;349;231;95;422	1	31	0	17.133	28.2	24.1	31.7	25	26.6	26.9	87999000	24856000	10528000	14352000
E7EX73;E9PGM1;E7EUU4;Q04637;C9J6B6;C9JF13;H7C044;C9J2Z7;C9K073;REV__F5H7J8;H7C0V6;REV__Q8NEG2;REV__C9JQZ6;REV__J3KQX6;A0A0A0MSA7;A0A0U1RQK7;O43432	E7EX73;E9PGM1;E7EUU4;Q04637	13;13;13;13;5;5;4;4;4;1;1;1;1;1;1;1;1	13;13;13;13;5;5;4;4;4;1;1;1;1;1;1;1;1	13;13;13;13;5;5;4;4;4;1;1;1;1;1;1;1;1	Eukaryotic translation initiation factor 4 gamma 1	EIF4G1	;;;	17	13	13	13	8	10	12	0	0	1	8	10	12	0	0	1	8	10	12	0	0	1	11.5	11.5	11.5	158.64	1436	1436;1513;1560;1599;757;903;226;833;869;157;180;295;324;340;1621;1774;1585	1	31	0	26.25	6.3	9.3	10.9	0	0	0.7	27604000	7666200	9135900	10582000
P61160;F5H6T1	P61160;F5H6T1	6;5	6;5	6;5	Actin-related protein 2	ACTR2	;	2	6	6	6	6	6	6	3	3	2	6	6	6	3	3	2	6	6	6	3	3	2	26.9	26.9	26.9	44.76	394	394;339	1	29	0	19.679	26.9	26.9	26.9	17.3	16	12.2	29135000	11566000	7398300	7572000
Q01813;B1APP6;H0Y757;H0Y3Y3;B1APP8;V9GY25;Q5VSR5	Q01813	14;5;3;3;3;2;2	14;5;3;3;3;2;2	12;5;3;3;3;2;1	ATP-dependent 6-phosphofructokinase, platelet type	PFKP		7	14	14	12	3	3	4	7	7	7	3	3	4	7	7	7	2	2	3	5	5	5	22.2	22.2	18.6	85.595	784	784;240;103;166;202;118;210	1	31	0	71.943	5.1	4.3	5.7	11.4	10.1	10.1	22596000	1984300	1824800	1234500
Q08554	Q08554	5	5	5	Desmocollin-1	DSC1		1	5	5	5	4	5	3	3	4	3	4	5	3	3	4	3	4	5	3	3	4	3	8.1	8.1	8.1	99.986	894	894	1	31	0	21.566	5.8	8.1	4.1	4.7	6.9	4.7	40501000	6733800	4885300	4234800
Q14677;H0YD52	Q14677	10;1	10;1	10;1	Clathrin interactor 1	CLINT1		2	10	10	10	9	9	9	1	1	0	9	9	9	1	1	0	9	9	9	1	1	0	22.1	22.1	22.1	68.259	625	625;133	1	31	0	29.434	19.8	19.8	19.7	2.9	2.9	0	22598000	8910200	6840900	6748500
Q6NZY4;F5H6J5;F5GX80	Q6NZY4;F5H6J5;F5GX80	11;6;6	11;6;6	11;6;6	Zinc finger CCHC domain-containing protein 8	ZCCHC8	;;	3	11	11	11	8	8	9	0	0	0	8	8	9	0	0	0	8	8	9	0	0	0	23.1	23.1	23.1	78.576	707	707;185;211	1	30	0	84.534	19.1	19.4	20.9	0	0	0	18798000	7884700	5147000	5766600
D3YTB5;P51617;H7C2I6;H7C224;H7C3C1;H7C1F0;F8WAB6;F6U4U2;P51955	D3YTB5;P51617;H7C2I6;H7C224	7;7;5;5;1;1;1;1;1	7;7;5;5;1;1;1;1;1	7;7;5;5;1;1;1;1;1	Interleukin-1 receptor-associated kinase 1	IRAK1	;;;	9	7	7	7	3	4	3	3	4	3	3	4	3	3	4	3	3	4	3	3	4	3	14.4	14.4	14.4	76.059	708	708;712;276;392;218;234;339;388;445	1	30	0	16.372	6.4	10.2	6.5	6.5	10.7	6.4	10665000	1266200	2667300	935490
J3QRN6;O94832;K7EIG7;J3KRL0	J3QRN6;O94832;K7EIG7;J3KRL0	12;12;10;7	12;12;10;7	12;12;10;7	Unconventional myosin-Id	MYO1D	;;;	4	12	12	12	12	7	10	0	0	0	12	7	10	0	0	0	12	7	10	0	0	0	16.1	16.1	16.1	111.29	961	961;1006;918;436	1	30	0	33.93	16.1	9.4	14.3	0	0	0	17561000	8082600	3836500	5641600
O43242;H0YGV8	O43242	10;2	10;2	10;2	26S proteasome non-ATPase regulatory subunit 3	PSMD3		2	10	10	10	7	6	4	5	4	3	7	6	4	5	4	3	7	6	4	5	4	3	24.2	24.2	24.2	60.977	534	534;117	1	30	0	22.315	17.4	15.9	10.9	13.1	11	7.1	20747000	7897800	3736600	2795600
O60884;I3L320;A0A087WT48	O60884	10;1;1	10;1;1	10;1;1	DnaJ homolog subfamily A member 2	DNAJA2		3	10	10	10	5	6	3	5	6	5	5	6	3	5	6	5	5	6	3	5	6	5	35.2	35.2	35.2	45.745	412	412;47;134	1	30	0	31.801	21.8	25.2	10.2	23.1	23.8	19.4	24163000	5484900	3423200	1247700
P26641	P26641	6	6	6	Elongation factor 1-gamma	EEF1G		1	6	6	6	5	4	3	4	5	4	5	4	3	4	5	4	5	4	3	4	5	4	21.5	21.5	21.5	50.118	437	437	1	25	0	13.988	18.1	16.2	14.4	16.2	19.7	10.5	97633000	19401000	10667000	9640500
P35998;C9JLS9	P35998	9;3	9;3	9;3	26S protease regulatory subunit 7	PSMC2		2	9	9	9	7	6	5	4	4	4	7	6	5	4	4	4	7	6	5	4	4	4	22.6	22.6	22.6	48.633	433	433;130	1	30	0	26.947	19.4	17.6	14.3	11.5	11.5	11.1	18347000	6768600	3621300	2177300
P53985;Q5T8R3;Q5T8R5	P53985;Q5T8R3;Q5T8R5	6;3;3	6;3;3	6;3;3	Monocarboxylate transporter 1	SLC16A1	;;	3	6	6	6	5	4	6	3	4	4	5	4	6	3	4	4	5	4	6	3	4	4	12.8	12.8	12.8	53.944	500	500;296;456	1	30	0	30.469	12.8	9.2	12.8	8.6	12.6	12.6	75211000	17495000	15452000	12380000
P67936;K7EMU5;K7EPB9	P67936	15;4;4	9;3;3	7;1;3	Tropomyosin alpha-4 chain	TPM4		3	15	9	7	15	14	15	0	0	1	9	8	9	0	0	0	7	6	7	0	0	0	43.1	31.9	27.4	28.521	248	248;102;110	1	30	0	54.687	43.1	39.9	43.1	0	0	4	64340000	29488000	13632000	21219000
P40937;F5H5S0;C9JH72;F5H304;E9PEP3;F5H0U6	P40937	6;2;2;1;1;1	6;2;2;1;1;1	6;2;2;1;1;1	Replication factor C subunit 5	RFC5		6	6	6	6	5	6	4	4	3	3	5	6	4	4	3	3	5	6	4	4	3	3	25.6	25.6	25.6	38.496	340	340;104;104;63;99;139	1	28	0	20.48	21.5	25.6	17.4	17.9	13.8	12.9	10710000	2949900	2768300	2237600
Q15386	Q15386	10	10	10	Ubiquitin-protein ligase E3C	UBE3C		1	10	10	10	3	4	3	7	2	5	3	4	3	7	2	5	3	4	3	7	2	5	13.6	13.6	13.6	123.92	1083	1083	1	28	0	20.055	3.3	5.6	4.4	9.7	3	6.8	7673400	1459400	908870	819610
Q7L8L6	Q7L8L6	10	10	10	FAST kinase domain-containing protein 5	FASTKD5		1	10	10	10	6	3	5	6	5	3	6	3	5	6	5	3	6	3	5	6	5	3	17.8	17.8	17.8	86.573	764	764	1	28	0	16.826	9.8	5.2	6.9	10.3	9.6	4.8	11811000	3129100	921420	1942900
CON__P02662	CON__P02662	4	4	4				1	4	4	4	2	2	1	4	4	4	2	2	1	4	4	4	2	2	1	4	4	4	28.1	28.1	28.1	22.975	199	199	1	25	0	19.018	13.6	11.1	6	28.1	28.1	28.1	26547000	1302100	1963000	1023600
D6RAN4;P32969;H0Y9V9;H0Y9R4;E7ESE0	D6RAN4;P32969;H0Y9V9;H0Y9R4	5;5;4;3;2	5;5;4;3;2	5;5;4;3;2	60S ribosomal protein L9	RPL9	;;;	5	5	5	5	5	5	4	3	5	5	5	5	4	3	5	5	5	5	4	3	5	5	39.2	39.2	39.2	20.775	181	181;192;189;91;166	1	27	0	15.839	39.2	39.2	24.3	13.8	39.2	39.2	51434000	15465000	8856200	9429800
P06733;K7EM90;F5H1C3;E5RI09;E5RG95;K7EPM1;K7EKN2;E5RGZ4;F5H0C8;P13929;P09104	P06733;K7EM90	8;4;1;1;1;1;1;1;1;1;1	8;4;1;1;1;1;1;1;1;1;1	8;4;1;1;1;1;1;1;1;1;1	Alpha-enolase;Enolase	ENO1	;	11	8	8	8	4	4	3	5	4	5	4	4	3	5	4	5	4	4	3	5	4	5	25.6	25.6	25.6	47.168	434	434;195;103;148;154;196;212;283;315;434;434	1	28	0	26.935	12.9	10.6	11.1	16.6	12.2	16.6	16419000	2891300	2239400	1985100
P52292;J3QLL0;J3KS65;J3QL07	P52292	10;3;3;1	10;3;3;1	10;3;3;1	Importin subunit alpha-1	KPNA2		4	10	10	10	5	4	5	5	4	3	5	4	5	5	4	3	5	4	5	5	4	3	38.4	38.4	38.4	57.861	529	529;134;143;50	1	26	0	74.286	21.4	13	15.9	20	16.6	10.4	15310000	3200100	1607400	3258500
P54136;E5RH09;E5RJM9	P54136	11;1;1	11;1;1	11;1;1	Arginine--tRNA ligase, cytoplasmic	RARS		3	11	11	11	8	9	6	2	2	1	8	9	6	2	2	1	8	9	6	2	2	1	21.7	21.7	21.7	75.378	660	660;113;129	1	28	0	29.923	17.1	16.4	11.4	2.9	3.5	1.8	22483000	8734800	6793900	4629500
P60866;E5RIP1;E5RJX2;G3XAN0	P60866;E5RIP1;E5RJX2	3;2;2;1	3;2;2;1	3;2;2;1	40S ribosomal protein S20	RPS20	;;	4	3	3	3	3	3	3	3	3	3	3	3	3	3	3	3	3	3	3	3	3	3	22.7	22.7	22.7	13.373	119	119;46;61;64	1	27	0	10.046	22.7	22.7	22.7	22.7	22.7	22.7	157060000	33032000	24413000	25546000
P62081;B5MCP9	P62081;B5MCP9	6;5	6;5	6;5	40S ribosomal protein S7	RPS7	;	2	6	6	6	5	4	4	4	3	2	5	4	4	4	3	2	5	4	4	4	3	2	46.9	46.9	46.9	22.127	194	194;187	1	23	0	16.115	42.8	38.7	38.7	31.4	25.8	10.3	41438000	12329000	6947500	7159800
P62805	P62805	6	6	6	Histone H4	HIST1H4A		1	6	6	6	6	4	5	3	3	3	6	4	5	3	3	3	6	4	5	3	3	3	42.7	42.7	42.7	11.367	103	103	1	28	0	15.262	42.7	40.8	41.7	29.1	29.1	29.1	116970000	39068000	21629000	28365000
Q6NUK1;J3KN42;H3BMI3	Q6NUK1	9;4;1	9;4;1	9;4;1	Calcium-binding mitochondrial carrier protein SCaMC-1	SLC25A24		3	9	9	9	5	6	4	3	3	3	5	6	4	3	3	3	5	6	4	3	3	3	20.5	20.5	20.5	53.354	477	477;110;69	1	26	0	18.502	10.9	13.8	10.1	8.6	8.6	8	8856100	2873000	2529100	1684600
C9JAW5;C9JNU6;Q9Y241	C9JAW5;C9JNU6;Q9Y241	2;2;2	2;2;2	2;2;2	HIG1 domain family member 1A, mitochondrial	HIGD1A	;;	3	2	2	2	2	2	2	1	1	1	2	2	2	1	1	1	2	2	2	1	1	1	48.2	48.2	48.2	8.8131	83	83;96;93	1	15	0	7.5064	48.2	48.2	48.2	26.5	26.5	26.5	7068400	2413600	1920500	1468000
CON__P12763	CON__P12763	6	6	6				1	6	6	6	4	4	5	5	4	4	4	4	5	5	4	4	4	4	5	5	4	4	25.9	25.9	25.9	38.418	359	359	1	26	0	27.733	15	15	22.8	18.1	15.9	15	112930000	27645000	16119000	18928000
F8VWS0;P05388;G3V210;F8VW21;F8VU65;F8VQY6;F8VPE8;F8VRK7;F8VZS0;Q8NHW5;F8VS58;F8VWV4;F8W1K8	F8VWS0;P05388;G3V210;F8VW21;F8VU65;F8VQY6;F8VPE8;F8VRK7;F8VZS0;Q8NHW5;F8VS58	7;7;6;6;6;5;5;5;5;5;4;3;1	7;7;6;6;6;5;5;5;5;5;4;3;1	7;7;6;6;6;5;5;5;5;5;4;3;1	60S acidic ribosomal protein P0;60S acidic ribosomal protein P0-like	RPLP0;RPLP0P6	;;;;;;;;;;	13	7	7	7	4	5	5	4	5	4	4	5	5	4	5	4	4	5	5	4	5	4	31.3	31.3	31.3	30.456	281	281;317;166;244;247;142;153;156;246;317;121;111;107	1	27	0	16.872	19.6	21	21	14.9	17.4	14.2	44489000	11684000	9030000	8536800
J3KQN4;P83881;H0Y5B4;H7BZ11;H7BY91;H0Y3V9;R4GN19	J3KQN4;P83881;H0Y5B4;H7BZ11;H7BY91;H0Y3V9	5;5;4;4;3;3;2	5;5;4;4;3;3;2	1;1;1;1;1;1;0	60S ribosomal protein L36a	RPL36A;RPL36A-HNRNPH2	;;;;;	7	5	5	1	4	4	4	3	5	4	4	4	4	3	5	4	1	1	1	1	1	1	26.1	26.1	5.6	16.378	142	142;106;112;118;70;77;25	1	25	0	8.7782	25.4	25.4	25.4	20.4	26.1	25.4	143960000	35683000	22565000	24959000
P11021	P11021	11	10	10	78 kDa glucose-regulated protein	HSPA5		1	11	10	10	1	3	2	9	9	9	0	2	1	8	8	8	0	2	1	8	8	8	22.3	19.9	19.9	72.332	654	654	1	27	0	40.09	2.4	6.9	4.9	19.3	18.7	18.7	30552000	0	1138600	728420
P13010;C9JZ81	P13010	11;2	11;2	11;2	X-ray repair cross-complementing protein 5	XRCC5		2	11	11	11	8	4	8	2	2	1	8	4	8	2	2	1	8	4	8	2	2	1	22.5	22.5	22.5	82.704	732	732;131	1	26	0	17.564	17.9	9.4	15.8	6.6	6.6	2.6	9961000	4552700	1408200	3296700
P22102;F8WD69;C9JZG2;C9JKQ7;A0A140TA71;C9JBJ1;C9JTV6	P22102	9;2;1;1;1;1;1	9;2;1;1;1;1;1	9;2;1;1;1;1;1	Trifunctional purine biosynthetic protein adenosine-3;Phosphoribosylamine--glycine ligase;Phosphoribosylformylglycinamidine cyclo-ligase;Phosphoribosylglycinamide formyltransferase	GART		7	9	9	9	7	7	7	3	1	2	7	7	7	3	1	2	7	7	7	3	1	2	13.5	13.5	13.5	107.77	1010	1010;306;136;138;223;231;241	1	27	0	20.553	10	10	9.8	4.9	1.3	3.8	13710000	5614400	2411300	4038800
P42345;B1AKP8	P42345	11;4	11;4	11;4	Serine/threonine-protein kinase mTOR	MTOR		2	11	11	11	9	8	6	0	1	0	9	8	6	0	1	0	9	8	6	0	1	0	6.4	6.4	6.4	288.89	2549	2549;754	1	27	0	20.299	5.1	4.6	3.5	0	0.5	0	3333800	1562100	721100	969800
P43246;E9PHA6	P43246;E9PHA6	5;4	5;4	5;4	DNA mismatch repair protein Msh2	MSH2	;	2	5	5	5	4	5	4	4	4	3	4	5	4	4	4	3	4	5	4	4	4	3	7.1	7.1	7.1	104.74	934	934;921	1	27	0	12.228	5.9	7.1	5.9	6	6	4.8	3790700	975960	516520	674410
Q96A33;A0A087WYW6	Q96A33;A0A087WYW6	6;3	6;3	6;3	Coiled-coil domain-containing protein 47	CCDC47	;	2	6	6	6	3	4	4	3	2	4	3	4	4	3	2	4	3	4	4	3	2	4	20.1	20.1	20.1	55.873	483	483;190	1	25	0	9.4484	10.4	15.5	12.8	10.8	5.8	9.9	10026000	1613800	1726800	1449200
Q9BVP2	Q9BVP2	8	8	8	Guanine nucleotide-binding protein-like 3	GNL3		1	8	8	8	3	2	6	5	3	4	3	2	6	5	3	4	3	2	6	5	3	4	11.7	11.7	11.7	61.992	549	549	1	27	0	15.288	6	4.7	9.7	9.5	5.5	8.2	12434000	3050700	1221700	3915700
J3QRI7;J3QQQ9;J3QQV1;E5RIT6;J3QRC4;Q9UNX3;P61254;J3KTJ8;J3KS10;E5RHH1;J3KSS0	J3QRI7;J3QQQ9;J3QQV1;E5RIT6;J3QRC4;Q9UNX3;P61254;J3KTJ8;J3KS10	5;5;5;5;5;5;5;4;3;1;1	5;5;5;5;5;5;5;4;3;1;1	5;5;5;5;5;5;5;4;3;1;1	60S ribosomal protein L26-like 1;60S ribosomal protein L26	RPL26;RPL26L1	;;;;;;;;	11	5	5	5	5	4	5	3	4	4	5	4	5	3	4	4	5	4	5	3	4	4	36.4	36.4	36.4	12.63	107	107;107;110;128;135;145;145;96;63;38;63	1	25	0	20.977	36.4	35.5	36.4	27.1	35.5	35.5	60448000	17611000	11106000	11238000
H0YMD0;H0YMU9;H0YN42;P07355;H0YKZ7;H0YLV6;H0YMT9;H0YKX9;H0YMW4;H0YMM1;H0YKS4;H0YKL9;H0YM50;A6NMY6;H0YKV8;H0YNP5;H0YMD9;H0YNB8;H0YKN4;H0YN28;H0YL33	H0YMD0;H0YMU9;H0YN42;P07355;H0YKZ7;H0YLV6;H0YMT9;H0YKX9;H0YMW4;H0YMM1;H0YKS4;H0YKL9;H0YM50;A6NMY6;H0YKV8;H0YNP5	6;6;6;6;5;5;5;5;5;5;5;4;4;4;3;3;2;1;1;1;1	6;6;6;6;5;5;5;5;5;5;5;4;4;4;3;3;2;1;1;1;1	6;6;6;6;5;5;5;5;5;5;5;4;4;4;3;3;2;1;1;1;1	Annexin;Annexin A2;Putative annexin A2-like protein	ANXA2;ANXA2P2	;;;;;;;;;;;;;;;	21	6	6	6	3	2	2	3	4	4	3	2	2	3	4	4	3	2	2	3	4	4	30	30	30	25.341	227	227;230;256;339;119;132;133;134;146;149;176;110;248;339;81;175;65;47;69;139;142	1	24	0	16.897	15.4	11.9	11.9	15.9	22.5	22	10116000	2156800	1144500	946870
O75306	O75306	6	6	6	NADH dehydrogenase [ubiquinone] iron-sulfur protein 2, mitochondrial	NDUFS2		1	6	6	6	6	6	6	2	3	2	6	6	6	2	3	2	6	6	6	2	3	2	19.7	19.7	19.7	52.545	463	463	1	26	0	17.166	19.7	19.7	19.7	6.5	11.4	9.9	13096000	4314400	3605200	3217300
P18583;J3QSZ5;H7C2G8	P18583;J3QSZ5	14;7;2	14;7;2	6;4;0	Protein SON	SON	;	3	14	14	6	8	7	5	2	2	2	8	7	5	2	2	2	2	3	1	1	1	1	9.4	9.4	3.8	263.83	2426	2426;454;343	1	26	0	31.245	4.9	5	3.4	1.3	1.3	2.2	23658000	9930100	5408500	3984000
P62753;A2A3R7;A2A3R5	P62753;A2A3R7;A2A3R5	4;3;2	4;3;2	4;3;2	40S ribosomal protein S6	RPS6	;;	3	4	4	4	3	3	4	4	3	2	3	3	4	4	3	2	3	3	4	4	3	2	14.5	14.5	14.5	28.68	249	249;91;218	1	25	0	35.167	9.6	14.1	14.5	14.5	14.1	10.8	98005000	20701000	19109000	18389000
Q16795;F5GY40	Q16795	8;3	8;3	7;3	NADH dehydrogenase [ubiquinone] 1 alpha subcomplex subunit 9, mitochondrial	NDUFA9		2	8	8	7	4	6	6	4	2	2	4	6	6	4	2	2	3	5	6	4	2	2	27.3	27.3	22	42.509	377	377;149	1	26	0	15.444	16.2	22.5	18.3	13	4.8	7.7	14671000	3828500	4434500	3019600
Q8WUM0	Q8WUM0	8	8	8	Nuclear pore complex protein Nup133	NUP133		1	8	8	8	3	6	5	3	2	2	3	6	5	3	2	2	3	6	5	3	2	2	11.2	11.2	11.2	128.98	1156	1156	1	26	0	16.366	4	7.8	6.5	4.8	2.8	2.8	6516300	1895700	1588200	2052900
Q92947;K7ES74;K7EKH1;K7ERX1	Q92947	4;1;1;1	4;1;1;1	4;1;1;1	Glutaryl-CoA dehydrogenase, mitochondrial	GCDH		4	4	4	4	4	3	3	3	3	4	4	3	3	3	3	4	4	3	3	3	3	4	17.4	17.4	17.4	48.127	438	438;131;148;204	1	24	0	15.046	17.4	11.9	11.9	11.9	11.9	17.4	15661000	4688900	1888400	1683200
Q99832;F8WBP8;F8WAM2	Q99832	11;1;1	11;1;1	11;1;1	T-complex protein 1 subunit eta	CCT7		3	11	11	11	6	5	5	3	2	5	6	5	5	3	2	5	6	5	5	3	2	5	29.3	29.3	29.3	59.366	543	543;83;98	1	26	0	25.207	19.7	11.8	12.7	5.2	4.2	11.8	8181900	2376400	1967800	1406000
Q9UBF2	Q9UBF2	6	6	5	Coatomer subunit gamma-2	COPG2		1	6	6	5	4	5	3	5	4	4	4	5	3	5	4	4	3	4	2	4	3	3	12.5	12.5	11.1	97.621	871	871	1	25	0	13.858	8	11.4	6	11.4	7.1	8.8	5659300	1098000	869410	792030
O95816	O95816	5	5	5	BAG family molecular chaperone regulator 2	BAG2		1	5	5	5	2	2	2	3	4	5	2	2	2	3	4	5	2	2	2	3	4	5	29.9	29.9	29.9	23.772	211	211	1	24	0	34.082	18	18	18	25.6	25.6	29.9	36743000	5635900	2220300	3446700
Q96II5;P10398;H7C560;P15056;H7C4S5	Q96II5;P10398	9;9;2;2;1	9;9;2;2;1	6;6;0;0;0	Serine/threonine-protein kinase A-Raf	ARAF	;	5	9	9	6	1	1	1	8	5	6	1	1	1	8	5	6	1	1	1	5	4	4	18.4	18.4	12.6	67.925	609	609;606;375;766;102	1	22	0	18.662	3	3	3	16.6	8.5	10.7	12681000	107070	62770	102580
P39023;H7C3M2;H7C422;G5E9G0;F8WCR1;B5MCW2;Q92901	P39023;H7C3M2;H7C422;G5E9G0;F8WCR1;B5MCW2	8;6;6;5;4;4;1	8;6;6;5;4;4;1	8;6;6;5;4;4;1	60S ribosomal protein L3	RPL3	;;;;;	7	8	8	8	7	6	4	3	2	3	7	6	4	3	2	3	7	6	4	3	2	3	26.3	26.3	26.3	46.108	403	403;261;305;351;180;272;407	1	25	0	25.999	22.3	21.3	13.4	6.9	5.2	6.9	54784000	18010000	13944000	9676100
P63244;D6RHH4;D6RAC2;J3KPE3;D6RAU2;E9PD14;H0YAF8;D6REE5;D6RFZ9;H0Y8W2;D6RGK8;D6RF23;D6R909;D6RBD0;D6RFX4;D6R9Z1;H0YAM7;D6R9L0;H0Y9P0;D6RHJ5;D6RDI0;H0Y8R5	P63244;D6RHH4;D6RAC2;J3KPE3;D6RAU2;E9PD14;H0YAF8;D6REE5;D6RFZ9;H0Y8W2	8;6;6;6;5;5;5;5;4;4;3;3;3;3;3;3;3;3;2;2;1;1	8;6;6;6;5;5;5;5;4;4;3;3;3;3;3;3;3;3;2;2;1;1	8;6;6;6;5;5;5;5;4;4;3;3;3;3;3;3;3;3;2;2;1;1	Guanine nucleotide-binding protein subunit beta-2-like 1;Guanine nucleotide-binding protein subunit beta-2-like 1, N-terminally processed	GNB2L1	;;;;;;;;;	22	8	8	8	3	2	4	6	5	5	3	2	4	6	5	5	3	2	4	6	5	5	25.2	25.2	25.2	35.076	317	317;233;269;273;147;153;198;321;197;274;71;101;116;160;194;236;247;300;83;86;39;138	1	25	0	29.882	8.5	5.4	13.6	20.5	17.4	17.4	36122000	5063300	1675800	3937900
Q15029;K7EP67;K7EJ74	Q15029	9;3;1	9;3;1	9;3;1	116 kDa U5 small nuclear ribonucleoprotein component	EFTUD2		3	9	9	9	4	4	5	3	4	5	4	4	5	3	4	5	4	4	5	3	4	5	11.9	11.9	11.9	109.43	972	972;223;134	1	25	0	17.269	6.7	5.8	7.1	4.7	6	7	5925300	1166300	1195700	941310
Q71U36;Q13748;Q6PEY2;F8VQQ4	Q71U36;Q13748;Q6PEY2	30;21;15;14	2;2;2;1	1;1;1;1	Tubulin alpha-1A chain;Tubulin alpha-3C/D chain;Tubulin alpha-3E chain	TUBA1A;TUBA3C;TUBA3E	;;	4	30	2	1	26	27	25	24	25	27	2	2	2	2	2	2	1	1	1	1	1	1	72.3	6	3.1	50.135	451	451;450;450;219	1	18	0	27.259	67.6	72.3	70.7	64.3	69	63.4	62231000	15354000	7589300	8136400
Q7Z406;M0QY43;A1L2Z2	Q7Z406;M0QY43	17;12;4	7;5;2	7;5;2	Myosin-14	MYH14	;	3	17	7	7	11	13	14	2	3	3	2	3	6	1	1	1	2	3	6	1	1	1	9.6	4.5	4.5	227.87	1995	1995;1002;638	1	17	0	32.983	5.4	6.9	7.6	1.4	1.9	1.9	251670000	97417000	69235000	78982000
Q96EY1;I3L1T6	Q96EY1	7;1	7;1	7;1	DnaJ homolog subfamily A member 3, mitochondrial	DNAJA3		2	7	7	7	2	2	2	4	5	7	2	2	2	4	5	7	2	2	2	4	5	7	19	19	19	52.488	480	480;185	1	22	0	13.313	7.3	7.3	7.3	10.8	13.8	19	15101000	1143000	763620	650720
Q9H3U1	Q9H3U1	6	6	6	Protein unc-45 homolog A	UNC45A		1	6	6	6	5	4	4	3	2	2	5	4	4	3	2	2	5	4	4	3	2	2	10.6	10.6	10.6	103.08	944	944	1	24	0	22.215	9.2	8.4	7.9	7	4.9	4.2	2619800	1059800	379820	594320
A0A0A0MRP0;Q8IWC1	A0A0A0MRP0;Q8IWC1	11;11	11;11	11;11	MAP7 domain-containing protein 3	MAP7D3	;	2	11	11	11	1	2	2	8	5	5	1	2	2	8	5	5	1	2	2	8	5	5	16.3	16.3	16.3	90.131	802	802;876	1	23	0	21.595	1.5	2.4	2.5	12.7	7.4	8.1	20863000	623060	1052100	657970
C9J2Y9;P30876;C9J4M6	C9J2Y9;P30876;C9J4M6	8;8;7	8;8;7	8;8;7	DNA-directed RNA polymerase;DNA-directed RNA polymerase II subunit RPB2	POLR2B	;;	3	8	8	8	3	3	2	5	4	4	3	3	2	5	4	4	3	3	2	5	4	4	9.2	9.2	9.2	133.06	1167	1167;1174;1099	1	24	0	14.15	4.1	2.8	2.1	5	3.9	3.9	5498800	1702300	412710	129980
CON__ENSEMBL:ENSBTAP00000024146	CON__ENSEMBL:ENSBTAP00000024146	7	7	7				1	7	7	7	4	4	3	3	5	4	4	4	3	3	5	4	4	4	3	3	5	4	7.1	7.1	7.1	164.34	1477	1477	1	23	0	24.56	4	4	2.8	3.1	5.5	4	8590200	2042400	1293200	1272900
O95071;E7EMW7;E5RFK7;E7ET84	O95071;E7EMW7	9;8;2;2	9;8;2;2	9;8;2;2	E3 ubiquitin-protein ligase UBR5	UBR5	;	4	9	9	9	6	7	5	2	1	3	6	7	5	2	1	3	6	7	5	2	1	3	4.3	4.3	4.3	309.35	2799	2799;2792;166;527	1	24	0	20.987	2.8	3.4	2.2	1	0.4	1.2	3751000	1778000	1083200	398970
P09874	P09874	9	9	9	Poly [ADP-ribose] polymerase 1	PARP1		1	9	9	9	5	4	6	3	3	3	5	4	6	3	3	3	5	4	6	3	3	3	11.7	11.7	11.7	113.08	1014	1014	1	24	0	23.883	7.3	5.3	8.5	4.1	4.1	4.1	13684000	4700000	1790500	3878900
Q3ZCQ8;M0R0C3;M0R2F8;M0R003;M0QXC3;M0R2Z3;M0R303;M0R2D2;M0R047;M0R1Y4	Q3ZCQ8;M0R0C3;M0R2F8	5;4;4;2;1;1;1;1;1;1	5;4;4;2;1;1;1;1;1;1	5;4;4;2;1;1;1;1;1;1	Mitochondrial import inner membrane translocase subunit TIM50	TIMM50	;;	10	5	5	5	3	5	5	4	4	3	3	5	5	4	4	3	3	5	5	4	4	3	18.7	18.7	18.7	39.646	353	353;104;157;257;111;116;117;141;227;256	1	24	0	16.906	10.8	18.7	18.7	15.6	13.9	10.8	40026000	5137900	6543500	7994000
Q9NXE4;H7BXF4;B1PBA3;H7C1Q6;H7C235;H7C0W5;C9J647;H7C2J2;F8WF03;F2Z2I0;F2Z2W5;H7C2E2	Q9NXE4;H7BXF4;B1PBA3;H7C1Q6;H7C235;H7C0W5	8;7;7;5;4;4;3;2;1;1;1;1	8;7;7;5;4;4;3;2;1;1;1;1	8;7;7;5;4;4;3;2;1;1;1;1	Sphingomyelin phosphodiesterase 4	SMPD4	;;;;;	12	8	8	8	5	5	5	5	2	2	5	5	5	5	2	2	5	5	5	5	2	2	12.1	12.1	12.1	93.351	827	827;837;866;741;211;313;135;274;50;56;57;265	1	24	0	17.65	8.2	7.4	7.6	7.1	2.9	2.9	6697900	2248000	1605600	1445000
Q9UQE7	Q9UQE7	11	11	11	Structural maintenance of chromosomes protein 3	SMC3		1	11	11	11	6	3	2	5	4	4	6	3	2	5	4	4	6	3	2	5	4	4	14.9	14.9	14.9	141.54	1217	1217	1	24	0	44.121	7.9	4	2.1	7.1	4.1	3.8	10487000	2404800	862950	935600
A0A0B4J269;Q13509;G3V2A3;G3V5W4;G3V2R8;G3V3R4;G3V2N6	A0A0B4J269;Q13509	18;18;6;2;2;2;2	5;5;1;1;1;1;1	3;3;1;1;1;1;1	Tubulin beta-3 chain	TUBB3	;	7	18	5	3	16	17	15	16	16	16	4	4	3	4	4	4	2	2	1	2	2	2	23.6	9	6.4	88.381	797	797;450;189;97;118;148;164	1	23	0	35.853	22.1	22.1	18.9	21	19.3	21	49748000	9559600	6945600	6950300
J3QQ67;Q07020;F8VYV2;G3V203;H0YHA7;F8VUA6;A0A075B7A0;F8VXR6	J3QQ67;Q07020;F8VYV2;G3V203;H0YHA7;F8VUA6;A0A075B7A0	5;5;4;4;4;3;3;1	5;5;4;4;4;3;3;1	5;5;4;4;4;3;3;1	60S ribosomal protein L18	RPL18	;;;;;;	8	5	5	5	5	4	4	2	3	2	5	4	4	2	3	2	5	4	4	2	3	2	30.5	30.5	30.5	21.728	190	190;188;133;164;167;130;138;84	1	21	0	50.908	30.5	26.8	26.8	12.6	20	12.6	50789000	19019000	11966000	11411000
O14925;Q5SRD1;B4DDK6	O14925;Q5SRD1	4;2;1	4;2;1	4;2;1	Mitochondrial import inner membrane translocase subunit Tim23;Putative mitochondrial import inner membrane translocase subunit Tim23B	TIMM23;TIMM23B	;	3	4	4	4	4	4	4	4	3	3	4	4	4	4	3	3	4	4	4	4	3	3	27.3	27.3	27.3	21.943	209	209;257;140	1	23	0	20.275	27.3	27.3	27.3	27.3	23.4	23.4	23550000	2858500	4215100	5755600
O43143	O43143	8	8	8	Pre-mRNA-splicing factor ATP-dependent RNA helicase DHX15	DHX15		1	8	8	8	6	5	6	2	2	2	6	5	6	2	2	2	6	5	6	2	2	2	12.3	12.3	12.3	90.932	795	795	1	23	0	28.07	9.1	7.8	9.3	2.4	2.3	3.6	12824000	5195500	2069600	3423500
P52597;A0A1B0GW42;H0YBG7;H0YBD7	P52597	6;2;2;2	4;2;0;0	4;2;0;0	Heterogeneous nuclear ribonucleoprotein F;Heterogeneous nuclear ribonucleoprotein F, N-terminally processed	HNRNPF		4	6	4	4	5	5	6	5	5	5	4	3	4	3	3	3	4	3	4	3	3	3	20.2	13.7	13.7	45.671	415	415;98;185;194	1	23	0	22.873	17.8	16.4	20.2	16.4	16.4	16.4	24156000	6085400	2342500	4684900
P56192;H0YHV5;H0YIP0;H0YIC2;H0YHL6;H0YI94;H0YI27;F5H2V6	P56192	11;4;2;1;1;1;1;1	11;4;2;1;1;1;1;1	11;4;2;1;1;1;1;1	Methionine--tRNA ligase, cytoplasmic	MARS		8	11	11	11	6	4	7	3	2	1	6	4	7	3	2	1	6	4	7	3	2	1	18.6	18.6	18.6	101.11	900	900;233;219;58;81;119;124;140	1	23	0	26.168	9.8	5	10.8	6	2.3	1.2	17108000	6341800	3091700	4735700
P62906	P62906	4	4	4	60S ribosomal protein L10a	RPL10A		1	4	4	4	4	3	4	2	3	2	4	3	4	2	3	2	4	3	4	2	3	2	19.8	19.8	19.8	24.831	217	217	1	23	0	9.1709	19.8	18.4	19.8	12	18.4	12	29916000	10455000	4942400	6409000
P81605	P81605	4	4	4	Dermcidin;Survival-promoting peptide;DCD-1	DCD		1	4	4	4	4	4	3	3	3	3	4	4	3	3	3	3	4	4	3	3	3	3	35.5	35.5	35.5	11.284	110	110	1	23	0	11.37	35.5	35.5	22.7	22.7	22.7	22.7	39961000	7778500	4750500	4206800
Q3LIE7;Q15392	Q3LIE7;Q15392	6;6	6;6	6;6	Delta(24)-sterol reductase	Nbla03646;DHCR24	;	2	6	6	6	3	3	2	5	4	2	3	3	2	5	4	2	3	3	2	5	4	2	22	22	22	49.436	427	427;516	1	23	0	10.702	13.8	8.7	6.6	14.8	11	6.6	9647500	2035300	1517800	1124800
Q5T9A4	Q5T9A4	21	5	3	ATPase family AAA domain-containing protein 3B	ATAD3B		1	21	5	3	19	17	17	14	19	18	3	2	3	4	5	4	1	1	1	2	3	3	37	10.8	5.7	72.572	648	648	1	21	0	14.37	33.5	30.1	32.1	28.5	35.6	32.3	15306000	2584200	1060400	1969200
Q9NR30	Q9NR30	8	8	6	Nucleolar RNA helicase 2	DDX21		1	8	8	6	5	4	6	2	4	1	5	4	6	2	4	1	3	3	4	2	4	1	15.8	15.8	12.4	87.343	783	783	1	23	0	16.436	9.2	7.7	10.9	5	9.2	1.4	11973000	4199700	2148400	3767000
A0A024QZP7;P06493;A0A087WZZ9;E5RIU6;K7ELV5;E7ESI2;G3V5T9;P24941;Q00526;G3V317;F8VXD2;F8VYH9;F8VZZ0;F8VTV8;F8VWX7;F8VZ51;K7EJ83;H0YAZ9;Q9BVE2;E7EUK8;E5RGN0;A0A087X209;A0A087WZU2;F5H6Z0;J3QSD7;Q00535;P11802;Q00534;P50750;Q96Q40;O94921;Q07002;Q00536;Q00537;Q9NYV4;Q14004	A0A024QZP7;P06493;A0A087WZZ9;E5RIU6	5;5;4;3;2;2;2;2;2;1;1;1;1;1;1;1;1;1;1;1;1;1;1;1;1;1;1;1;1;1;1;1;1;1;1;1	5;5;4;3;2;2;2;2;2;1;1;1;1;1;1;1;1;1;1;1;1;1;1;1;1;1;1;1;1;1;1;1;1;1;1;1	5;5;4;3;2;2;2;2;2;1;1;1;1;1;1;1;1;1;1;1;1;1;1;1;1;1;1;1;1;1;1;1;1;1;1;1	Cyclin-dependent kinase 1	CDC2;CDK1	;;;	36	5	5	5	5	3	3	3	3	3	5	3	3	3	3	3	5	3	3	3	3	3	21.9	21.9	21.9	34.081	297	297;297;224;189;164;238;346;298;305;39;132;170;186;201;203;208;213;260;324;340;393;418;448;470;1201;292;303;326;372;435;469;472;496;523;1490;1512	1	22	0	23.732	21.9	13.1	10.4	13.1	13.1	11.1	17965000	4860000	2230700	3005500
E7ENZ3;P48643;B7ZAR1;E9PCA1;D6RIZ7;H0Y914	E7ENZ3;P48643;B7ZAR1;E9PCA1	8;8;6;6;2;1	8;8;6;6;2;1	8;8;6;6;2;1	T-complex protein 1 subunit epsilon	CCT5	;;;	6	8	8	8	3	6	3	3	3	3	3	6	3	3	3	3	3	6	3	3	3	3	27.8	27.8	27.8	53.848	486	486;541;503;520;44;62	1	21	0	18.093	13.2	20.2	11.1	10.5	11.1	8.8	6042200	855100	2176500	695490
F1T0I1;J3KNL6;O15027;X6RGP5;A0A0C4DH09;Q8N9G1	F1T0I1;J3KNL6;O15027;X6RGP5;A0A0C4DH09	8;8;8;7;5;1	8;8;8;7;5;1	8;8;8;7;5;1	Protein transport protein Sec16A	SEC16A	;;;;	6	8	8	8	3	5	5	3	1	4	3	5	5	3	1	4	3	5	5	3	1	4	5.2	5.2	5.2	249.48	2334	2334;2357;2179;1059;751;385	1	21	0	12.971	2.6	3.2	3.8	2.4	1.1	2.7	9135000	2305700	2211000	2152400
H3BRU6;F8VZX2;Q15366;F8W0G4;F8VXH9;H3BSS4;F8W1G6;H3BND9;F8VRH0;J3QT27;E9PFP8;P57721	H3BRU6;F8VZX2;Q15366;F8W0G4;F8VXH9	5;5;5;3;3;2;2;1;1;1;1;1	5;5;5;3;3;2;2;1;1;1;1;1	4;4;4;2;2;2;2;1;1;0;0;0	Poly(rC)-binding protein 2	PCBP2	;;;;	12	5	5	4	3	4	2	3	2	3	3	4	2	3	2	3	2	3	2	3	2	3	31.9	31.9	25.2	31.6	301	301;321;365;158;160;184;202;112;310;322;361;371	1	21	0	24.117	23.9	27.6	14	20.9	17.3	18.3	14388000	3569000	3036900	2060000
H0YKD8;P46779;H0YLP6;H0YMF4	H0YKD8;P46779;H0YLP6;H0YMF4	5;5;4;4	5;5;4;4	5;5;4;4	60S ribosomal protein L28	RPL28	;;;	4	5	5	5	3	3	3	4	5	4	3	3	3	4	5	4	3	3	3	4	5	4	27.6	27.6	27.6	19.072	170	170;137;89;112	1	22	0	12.021	18.8	18.8	18.8	22.9	27.6	22.9	165020000	32274000	20771000	21254000
O94906	O94906	9	9	9	Pre-mRNA-processing factor 6	PRPF6		1	9	9	9	4	3	3	4	4	3	4	3	3	4	4	3	4	3	3	4	4	3	12	12	12	106.92	941	941	1	21	0	30.323	5.8	4.4	3.9	4.8	5	3.2	6178300	1715500	812700	948010
P04792;F8WE04;C9J3N8	P04792;F8WE04	6;3;2	6;3;2	6;3;2	Heat shock protein beta-1	HSPB1	;	3	6	6	6	3	4	4	4	3	4	3	4	4	4	3	4	3	4	4	4	3	4	36.1	36.1	36.1	22.782	205	205;186;37	1	22	0	13.804	18.5	20	23.4	26.3	18.5	26.3	38316000	6675100	5187700	6545900
P24539;Q5QNZ2	P24539;Q5QNZ2	6;5	6;5	6;5	ATP synthase F(0) complex subunit B1, mitochondrial	ATP5F1	;	2	6	6	6	5	5	6	1	2	1	5	5	6	1	2	1	5	5	6	1	2	1	27.3	27.3	27.3	28.908	256	256;195	1	21	0	26.164	22.7	21.5	27.3	4.7	10.5	4.7	15215000	6048700	3525800	4922500
P39019;A0A075B6E2;M0R2L9;M0QXK4;M0QYF7;M0R140	P39019;A0A075B6E2;M0R2L9;M0QXK4;M0QYF7;M0R140	6;3;3;3;3;3	6;3;3;3;3;3	6;3;3;3;3;3	40S ribosomal protein S19	RPS19	;;;;;	6	6	6	6	4	3	6	3	3	3	4	3	6	3	3	3	4	3	6	3	3	3	42.8	42.8	42.8	16.06	145	145;71;71;76;100;102	1	22	0	11.795	28.3	21.4	42.8	21.4	21.4	21.4	64120000	16418000	8132800	10831000
P42166;G5E972;P42167;H0YJH7	P42166;G5E972;P42167	8;5;5;1	8;5;5;1	8;5;5;1	Lamina-associated polypeptide 2, isoform alpha;Thymopoietin;Thymopentin;Lamina-associated polypeptide 2, isoforms beta/gamma;Thymopoietin;Thymopentin	TMPO	;;	4	8	8	8	6	6	6	1	2	1	6	6	6	1	2	1	6	6	6	1	2	1	17.6	17.6	17.6	75.491	694	694;414;454;237	1	22	0	15.605	12.4	13.3	13.5	1.7	3.7	1.7	19779000	6639400	4663700	5998000
P50990;H7C4C8	P50990;H7C4C8	10;6	10;6	10;6	T-complex protein 1 subunit theta	CCT8	;	2	10	10	10	7	6	6	0	2	1	7	6	6	0	2	1	7	6	6	0	2	1	20.4	20.4	20.4	59.62	548	548;323	1	22	0	19.862	13.3	13.3	13	0	3.8	1.8	13248000	6009800	3192700	3035500
Q9H0A0;A0A087WV29;E9PJN6;E9PMU0	Q9H0A0;A0A087WV29	9;5;3;3	9;5;3;3	9;5;3;3	N-acetyltransferase 10	NAT10	;	4	9	9	9	6	5	4	4	2	1	6	5	4	4	2	1	6	5	4	4	2	1	11.7	11.7	11.7	115.73	1025	1025;834;145;288	1	22	0	23.011	8.2	7.6	4.6	6	3.1	1.5	8882700	4311200	1339600	1452600
A0A087WTT1;E7EQV3;P11940;E7ERJ7;H0YAR2;Q9H361;E5RGH3;E5RJB9;B1ANR1;H0YAP2;H0YAS6;H0YBN4;H0YB75;H0YER0;E5RHG7;H0YEQ8;E5RH24;H0YAS7;H0YB86;H0Y6X6;Q4VXU2	A0A087WTT1;E7EQV3;P11940;E7ERJ7;H0YAR2	8;8;8;7;4;3;2;2;2;2;2;2;2;1;1;1;1;1;1;1;1	8;8;8;7;4;3;2;2;2;2;2;2;2;1;1;1;1;1;1;1;1	4;4;4;4;3;3;0;0;0;2;1;0;1;0;0;0;0;0;1;0;1	Polyadenylate-binding protein;Polyadenylate-binding protein 1	PABPC1	;;;;	21	8	8	4	6	5	5	1	1	0	6	5	5	1	1	0	4	2	2	0	0	0	21.8	21.8	9	58.535	522	522;591;636;604;284;631;108;129;129;131;169;174;183;68;75;112;118;136;165;195;614	1	21	0	17.595	16.9	15.3	14.2	4.6	4.6	0	18530000	8274900	4568500	5053700
A0A0A0MSI0;Q06830;A0A0A0MRQ5;H7C3T4;Q13162	A0A0A0MSI0;Q06830;A0A0A0MRQ5	6;6;3;2;2	6;6;3;2;2	5;5;2;2;2	Peroxiredoxin-1	PRDX1	;;	5	6	6	5	4	4	3	2	4	4	4	4	3	2	4	4	3	3	2	1	3	3	32.2	32.2	25.7	18.976	171	171;199;97;161;271	1	21	0	9.0161	23.4	23.4	18.7	12.3	21.6	19.9	23957000	6550800	1830200	3393100
B0YIW6;P48444;Q6P1Q5	B0YIW6;P48444	7;7;2	7;7;2	7;7;2	Coatomer subunit delta	ARCN1	;	3	7	7	7	4	4	5	2	2	3	4	4	5	2	2	3	4	4	5	2	2	3	18.8	18.8	18.8	61.626	552	552;511;189	1	20	0	14.825	8.3	9.2	10.9	4	4	10	13552000	3461500	2122900	2475900
C9J7E5;Q9Y5L0;E9PFH4	C9J7E5;Q9Y5L0;E9PFH4	6;6;4	6;6;4	6;6;4	Transportin-3	TNPO3	;;	3	6	6	6	6	6	4	1	2	0	6	6	4	1	2	0	6	6	4	1	2	0	12.1	12.1	12.1	108.05	957	957;923;857	1	19	0	19.796	12.1	12.1	7.7	2.6	4.4	0	4673100	2241600	1211700	912860
C9JXB8;C9JNW5;P83731	C9JXB8;C9JNW5;P83731	4;4;4	4;4;4	4;4;4	60S ribosomal protein L24	RPL24	;;	3	4	4	4	4	3	3	3	3	3	4	3	3	3	3	3	4	3	3	3	3	3	33.1	33.1	33.1	14.369	121	121;150;157	1	19	0	28.072	33.1	24.8	24.8	24.8	24.8	24.8	114900000	18834000	16861000	20232000
F2Z2E2;Q86VI3	F2Z2E2;Q86VI3	4;4	4;4	4;4	Ras GTPase-activating-like protein IQGAP3	IQGAP3	;	2	4	4	4	3	2	1	3	4	3	3	2	1	3	4	3	3	2	1	3	4	3	4.1	4.1	4.1	179.48	1588	1588;1631	1	19	0	14.047	3.3	2.6	1.8	3.3	4.1	3.3	3138800	602930	251360	74477
J3QR09;J3KTE4;P84098;J3QL15	J3QR09;J3KTE4;P84098	4;4;4;1	4;4;4;1	4;4;4;1	Ribosomal protein L19;60S ribosomal protein L19	RPL19	;;	4	4	4	4	4	3	4	3	3	3	4	3	4	3	3	3	4	3	4	3	3	3	22.3	22.3	22.3	23.134	193	193;194;196;128	1	20	0	22.637	22.3	18.1	22.3	17.6	17.6	17.6	46991000	13261000	8540200	9996200
M0R3D6;M0R1A7;M0R117;Q02543;M0R0P7	M0R3D6;M0R1A7;M0R117;Q02543;M0R0P7	5;5;5;5;3	5;5;5;5;3	5;5;5;5;3	60S ribosomal protein L18a	RPL18A	;;;;	5	5	5	5	5	3	3	3	3	4	5	3	3	3	3	4	5	3	3	3	3	4	33.3	33.3	33.3	16.714	141	141;147;154;176;137	1	21	0	9.0343	33.3	17	17	17	17	24.1	37596000	13973000	6057500	6775000
Q5T8U5;O15260;B7Z1G8	Q5T8U5;O15260;B7Z1G8	4;4;2	4;4;2	4;4;2	Surfeit locus protein 4	SURF4	;;	3	4	4	4	3	2	4	1	3	2	3	2	4	1	3	2	3	2	4	1	3	2	28	28	28	21.127	186	186;269;226	1	21	0	31.394	23.7	15.1	28	9.7	23.7	15.1	15626000	4933700	3354300	3139000
P00338;F5GXY2;F5GXH2;F5GYU2;F5GZQ4;F5H5J4;F5H6W8;F5H8H6;F5GXC7;F5GWW2;F5GXU1	P00338;F5GXY2;F5GXH2;F5GYU2	6;4;3;3;2;2;2;1;1;1;1	6;4;3;3;2;2;2;1;1;1;1	6;4;3;3;2;2;2;1;1;1;1	L-lactate dehydrogenase A chain	LDHA	;;;	11	6	6	6	3	5	3	3	2	4	3	5	3	3	2	4	3	5	3	3	2	4	22.9	22.9	22.9	36.688	332	332;156;114;144;72;89;94;42;45;45;46	1	21	0	27.766	12.7	19.9	12.3	14.5	9.3	15.4	5758100	1226900	1592500	513890
P40616;B4DZG7;F8VYN9;F8W1Z8	P40616;B4DZG7;F8VYN9	4;3;3;1	4;3;3;1	4;3;3;1	ADP-ribosylation factor-like protein 1	ARL1	;;	4	4	4	4	2	3	1	3	3	1	2	3	1	3	3	1	2	3	1	3	3	1	34.3	34.3	34.3	20.417	181	181;135;194;52	1	19	0	22.986	13.8	21.5	8.8	29.3	29.3	8.8	12727000	2773200	2262900	389720
P52907	P52907	8	8	7	F-actin-capping protein subunit alpha-1	CAPZA1		1	8	8	7	6	7	7	0	0	0	6	7	7	0	0	0	5	6	6	0	0	0	46.5	46.5	43	32.922	286	286	1	20	0	25.388	34.6	39.9	41.3	0	0	0	47617000	18750000	13447000	15421000
Q5T8U3;P62424;Q5T8U2	Q5T8U3;P62424	6;6;1	6;6;1	6;6;1	60S ribosomal protein L7a	RPL7A	;	3	6	6	6	5	3	5	3	2	2	5	3	5	3	2	2	5	3	5	3	2	2	30.9	30.9	30.9	21.545	191	191;266;151	1	20	0	31.038	30.9	18.8	25.7	20.9	14.1	14.1	54338000	20883000	8846100	14549000
P62979;J3QS39;J3QTR3;F5H6Q2;F5GYU3;F5H2Z3;F5H265;B4DV12;F5H388;F5H747;F5GXK7;J3QKN0;Q5PY61;Q96C32;P62987;P0CG47;P0CG48;M0R1V7;M0R1M6;M0R2S1;J3QSA3;F5GZ39	P62979;J3QS39;J3QTR3;F5H6Q2;F5GYU3;F5H2Z3;F5H265;B4DV12;F5H388;F5H747;F5GXK7;J3QKN0;Q5PY61;Q96C32;P62987;P0CG47;P0CG48;M0R1V7;M0R1M6;M0R2S1	4;3;3;3;3;3;3;3;3;3;3;3;3;3;3;3;3;2;2;2;1;1	4;3;3;3;3;3;3;3;3;3;3;3;3;3;3;3;3;2;2;2;1;1	4;3;3;3;3;3;3;3;3;3;3;3;3;3;3;3;3;2;2;2;1;1	Ubiquitin-40S ribosomal protein S27a;Ubiquitin;40S ribosomal protein S27a;Ubiquitin-60S ribosomal protein L40;Ubiquitin;60S ribosomal protein L40;Polyubiquitin-B;Ubiquitin;Polyubiquitin-C;Ubiquitin	RPS27A;UBB;UBC;UBA52	;;;;;;;;;;;;;;;;;;;	22	4	4	4	3	3	3	4	4	4	3	3	3	4	4	4	3	3	3	4	4	4	27.6	27.6	27.6	17.965	156	156;93;106;122;134;136;149;153;155;160;169;206;229;305;128;229;685;63;114;138;43;61	1	21	0	31.633	21.8	21.8	21.8	27.6	27.6	27.6	44808000	9458900	5221900	5535800
P68032;P63267;P62736;P68133;A6NL76;F8WB63;B8ZZJ2;C9JFL5;F6UVQ4;F6QUT6	P68032;P63267;P62736;P68133;A6NL76;F8WB63;B8ZZJ2;C9JFL5;F6UVQ4;F6QUT6	16;15;15;13;11;8;8;8;8;8	1;1;1;1;1;1;1;1;1;1	1;1;1;1;1;1;1;1;1;1	Actin, alpha cardiac muscle 1;Actin, gamma-enteric smooth muscle;Actin, aortic smooth muscle;Actin, alpha skeletal muscle	ACTC1;ACTG2;ACTA2;ACTA1	;;;;;;;;;	10	16	1	1	15	16	15	9	9	10	1	1	1	1	1	1	1	1	1	1	1	1	37.9	4.2	4.2	42.019	377	377;376;377;377;254;105;119;144;151;151	1	12	0	7.3743	36.3	37.9	36.3	31	31.8	33.2	1363600000	571080000	358880000	398300000
Q6R327;D6R9S6	Q6R327	7;1	7;1	7;1	Rapamycin-insensitive companion of mTOR	RICTOR		2	7	7	7	3	1	3	3	6	4	3	1	3	3	6	4	3	1	3	3	6	4	6.3	6.3	6.3	192.22	1708	1708;224	1	21	0	11.529	3.1	1	2.5	2.8	5.7	3.7	1529500	139480	46637	224210
Q96TA2;Q96I63;R4GNA5;Q5T8D1;Q5T8D2	Q96TA2;Q96I63	9;8;3;3;2	9;8;3;3;2	9;8;3;3;2	ATP-dependent zinc metalloprotease YME1L1	YME1L1	;	5	9	9	9	5	3	2	4	3	4	5	3	2	4	3	4	5	3	2	4	3	4	19	19	19	86.454	773	773;740;243;253;248	1	21	0	19.55	8.8	5.7	4	10	4.7	6.6	10705000	2484600	743210	785770
A0A087X2B5;P35613;A0A087WUV8;I3L192;R4GMX5	A0A087X2B5;P35613;A0A087WUV8;I3L192	4;4;3;2;1	4;4;3;2;1	4;4;3;2;1	Basigin	BSG	;;;	5	4	4	4	4	4	4	2	4	2	4	4	4	2	4	2	4	4	4	2	4	2	23.1	23.1	23.1	23.896	221	221;385;189;160;84	1	20	0	11.758	23.1	23.1	23.1	10.4	23.1	12.2	30082000	9982600	5288800	7008500
I3L2C7;P57678;I3L399	I3L2C7;P57678	8;8;1	8;8;1	8;8;1	Gem-associated protein 4	GEMIN4	;	3	8	8	8	4	5	4	3	1	3	4	5	4	3	1	3	4	5	4	3	1	3	11.8	11.8	11.8	118.82	1047	1047;1058;296	1	20	0	20.359	7	8.8	6.8	5.7	2.9	5.3	6852200	2500200	1756300	1377100
O75052;E9PSG0;E9PIP8;H7C2G1	O75052;E9PSG0	8;5;1;1	8;5;1;1	8;5;1;1	Carboxyl-terminal PDZ ligand of neuronal nitric oxide synthase protein	NOS1AP	;	4	8	8	8	0	0	0	7	6	5	0	0	0	7	6	5	0	0	0	7	6	5	15.4	15.4	15.4	56.149	506	506;349;81;150	1	19	0	17.913	0	0	0	15	12.3	11.9	25040000	0	0	0
O95831;E9PMA0	O95831	8;3	8;3	8;3	Apoptosis-inducing factor 1, mitochondrial	AIFM1		2	8	8	8	4	2	3	4	3	4	4	2	3	4	3	4	4	2	3	4	3	4	19.7	19.7	19.7	66.9	613	613;274	1	20	0	27.889	8.2	2.9	7	10.9	7.8	11.6	14247000	3392700	1475000	2287900
P00403	P00403	4	4	4	Cytochrome c oxidase subunit 2	MT-CO2		1	4	4	4	3	3	2	4	4	4	3	3	2	4	4	4	3	3	2	4	4	4	24.7	24.7	24.7	25.565	227	227	1	20	0	11.112	17.6	17.6	13.2	24.7	24.7	24.7	22097000	4833900	2103200	3242400
P04181	P04181	6	6	6	Ornithine aminotransferase, mitochondrial;Ornithine aminotransferase, hepatic form;Ornithine aminotransferase, renal form	OAT		1	6	6	6	6	2	3	4	3	2	6	2	3	4	3	2	6	2	3	4	3	2	19.6	19.6	19.6	48.534	439	439	1	20	0	19.207	19.6	6.4	10.9	13	8.4	6.4	27809000	8809900	2707700	4033500
P07195;C9J7H8;A8MW50;F5H793	P07195;C9J7H8;A8MW50;F5H793	5;4;4;3	5;4;4;3	5;4;4;3	L-lactate dehydrogenase B chain;L-lactate dehydrogenase	LDHB	;;;	4	5	5	5	3	3	3	5	3	3	3	3	3	5	3	3	3	3	3	5	3	3	19.2	19.2	19.2	36.638	334	334;136;232;102	1	20	0	20.345	12.3	10.2	11.7	19.2	12.3	12.3	15249000	3393800	1546700	1605900
Q71UI9;P0C0S5;C9J0D1;C9J386	Q71UI9;P0C0S5;C9J0D1;C9J386	4;4;3;2	4;4;3;2	2;2;1;1	Histone H2A.V;Histone H2A.Z;Histone H2A	H2AFV;H2AFZ	;;;	4	4	4	2	4	3	4	2	2	2	4	3	4	2	2	2	2	1	2	0	0	0	31.2	31.2	18.8	13.509	128	128;128;122;76	1	17	0	9.6588	31.2	23.4	31.2	12.5	12.5	12.5	199700000	73851000	40288000	48358000
P40939	P40939	4	4	4	Trifunctional enzyme subunit alpha, mitochondrial;Long-chain enoyl-CoA hydratase;Long chain 3-hydroxyacyl-CoA dehydrogenase	HADHA		1	4	4	4	2	3	4	2	1	2	2	3	4	2	1	2	2	3	4	2	1	2	8.4	8.4	8.4	82.999	763	763	1	20	0	11.69	3.9	6.6	8.4	3.9	2	3.9	2534300	431880	650570	680770
P62273;A0A087WTT6	P62273;A0A087WTT6	2;1	2;1	2;1	40S ribosomal protein S29	RPS29	;	2	2	2	2	2	2	2	2	2	2	2	2	2	2	2	2	2	2	2	2	2	2	33.9	33.9	33.9	6.6767	56	56;53	1	18	0	9.2856	33.9	33.9	33.9	33.9	33.9	33.9	361120000	116100000	60961000	72557000
Q06210;O94808;E5RJP4	Q06210;O94808	4;2;1	4;2;1	4;2;1	Glutamine--fructose-6-phosphate aminotransferase [isomerizing] 1;Glutamine--fructose-6-phosphate aminotransferase [isomerizing] 2	GFPT1;GFPT2	;	3	4	4	4	3	3	4	3	3	2	3	3	4	3	3	2	3	3	4	3	3	2	8.4	8.4	8.4	78.806	699	699;682;216	1	18	0	7.5173	6.6	6.6	8.4	6.6	6.6	3.4	2285200	436870	336080	744610
Q13263;M0R0K9;M0R2I3;M0R3C0	Q13263;M0R0K9	9;7;1;1	9;7;1;1	9;7;1;1	Transcription intermediary factor 1-beta	TRIM28	;	4	9	9	9	1	0	1	5	6	7	1	0	1	5	6	7	1	0	1	5	6	7	13.4	13.4	13.4	88.549	835	835;460;162;178	1	20	0	25.528	1.3	0	1	8.1	9.8	11.1	17735000	760580	0	306540
Q96AG4;I3L223	Q96AG4	6;1	6;1	6;1	Leucine-rich repeat-containing protein 59	LRRC59		2	6	6	6	3	6	4	2	3	2	3	6	4	2	3	2	3	6	4	2	3	2	26.4	26.4	26.4	34.93	307	307;62	1	20	0	10.771	10.7	26.4	18.2	8.1	15	8.1	32167000	6789200	8018700	7049000
Q9NZ01;M0QXM3;M0R3C3	Q9NZ01;M0QXM3	6;3;2	6;3;2	6;3;2	Very-long-chain enoyl-CoA reductase	TECR	;	3	6	6	6	4	3	3	3	2	4	4	3	3	3	2	4	4	3	3	3	2	4	18.5	18.5	18.5	36.034	308	308;131;105	1	20	0	11.986	11.4	8.8	8.4	8.4	6.2	12.3	39539000	12560000	9405100	6739900
A0A0U1RR32;A0A0U1RRH7;Q99878;Q96KK5;Q9BTM1;Q16777;Q93077;Q7L7L0;Q6FI13;P20671;P0C0S8;P04908;H0YFX9;Q96QV6;P16104;Q8IUE6	A0A0U1RR32;A0A0U1RRH7;Q99878;Q96KK5;Q9BTM1;Q16777;Q93077;Q7L7L0;Q6FI13;P20671;P0C0S8;P04908;H0YFX9;Q96QV6;P16104	3;3;3;3;3;3;3;3;3;3;3;3;2;2;2;1	1;1;1;1;1;1;1;1;1;1;1;1;1;0;0;0	1;1;1;1;1;1;1;1;1;1;1;1;1;0;0;0	Histone H2A type 1-J;Histone H2A type 1-H;Histone H2A.J;Histone H2A type 2-C;Histone H2A type 1-C;Histone H2A type 3;Histone H2A type 2-A;Histone H2A type 1-D;Histone H2A type 1;Histone H2A type 1-B/E;Histone H2A;Histone H2A type 1-A;Histone H2AX	HIST1H2AJ;HIST1H2AH;H2AFJ;HIST2H2AC;HIST1H2AC;HIST3H2A;HIST2H2AA3;HIST1H2AD;HIST1H2AG;HIST1H2AB;HIST1H2AA;H2AFX	;;;;;;;;;;;;;;	16	3	1	1	3	3	3	3	3	3	1	1	1	1	1	1	1	1	1	1	1	1	20.7	11.2	11.2	18.481	169	169;170;128;128;129;129;130;130;130;130;130;130;92;131;143;130	1	12	0	5.205	20.7	20.7	20.7	20.7	20.7	20.7	42703000	13180000	9129600	8366000
C9JJT5;C9JU26;G3V325;P56134	C9JJT5;C9JU26;G3V325;P56134	2;2;2;2	2;2;2;2	2;2;2;2	ATP synthase subunit f, mitochondrial	ATP5J2-PTCD1;ATP5J2	;;;	4	2	2	2	2	2	2	2	2	2	2	2	2	2	2	2	2	2	2	2	2	2	44.4	44.4	44.4	5.9149	54	54;98;749;94	1	12	0	7.5482	44.4	44.4	44.4	44.4	44.4	44.4	58872000	14247000	8384400	9409100
E7ETZ0;H0Y7A7;E7EMB3;P62158;Q96HY3;G3V361;G3V226;M0QZ52;F8WBR5;G3V479	E7ETZ0;H0Y7A7;E7EMB3;P62158;Q96HY3;G3V361	5;5;5;5;4;3;2;2;1;1	5;5;5;5;4;3;2;2;1;1	5;5;5;5;4;3;2;2;1;1	Calmodulin	CALM1;CALM2	;;;;;	10	5	5	5	5	5	4	0	0	0	5	5	4	0	0	0	5	5	4	0	0	0	44	44	44	16.966	150	150;187;196;149;113;98;76;83;65;83	1	16	0	44.424	44	44	29.3	0	0	0	34542000	16132000	10967000	7443100
P07196;A0A087X0W2	P07196;A0A087X0W2	12;6	9;6	9;6	Neurofilament light polypeptide	NEFL	;	2	12	9	9	0	0	0	11	9	8	0	0	0	8	6	5	0	0	0	8	6	5	23	17.9	17.9	61.516	543	543;284	1	19	0	22.316	0	0	0	21.5	16.6	13.6	23195000	0	0	0
P08574	P08574	8	8	8	Cytochrome c1, heme protein, mitochondrial	CYC1		1	8	8	8	6	5	3	1	3	1	6	5	3	1	3	1	6	5	3	1	3	1	40.9	40.9	40.9	35.422	325	325	1	19	0	13.604	33.2	21.2	12.3	4.9	9.8	4.9	18092000	7287600	3637700	2471700
P23258;Q9NRH3;K7EKE5;K7EIS0	P23258;Q9NRH3	8;6;2;2	8;6;2;2	8;6;2;2	Tubulin gamma-1 chain;Tubulin gamma-2 chain	TUBG1;TUBG2	;	4	8	8	8	5	3	4	3	1	3	5	3	4	3	1	3	5	3	4	3	1	3	33.5	33.5	33.5	51.169	451	451;451;135;265	1	19	0	14.231	18.4	12.6	17.3	11.8	6	14.2	12203000	4740400	1990100	2526000
P49755;G3V2K7	P49755;G3V2K7	4;2	4;2	4;2	Transmembrane emp24 domain-containing protein 10	TMED10	;	2	4	4	4	4	4	3	2	2	1	4	4	3	2	2	1	4	4	3	2	2	1	21.5	21.5	21.5	24.976	219	219;153	1	19	0	13.168	21.5	21.5	13.7	11	8.7	3.2	35662000	13479000	9331300	7516300
P60228;E5RGA2;H0YAW4;E5RHS5;E5RIP5;E5RJ25;H0YBP5;E5RII3;H0YBR5	P60228;E5RGA2;H0YAW4;E5RHS5	4;3;2;2;1;1;1;1;1	4;3;2;2;1;1;1;1;1	4;3;2;2;1;1;1;1;1	Eukaryotic translation initiation factor 3 subunit E	EIF3E	;;;	9	4	4	4	2	3	3	2	2	2	2	3	3	2	2	2	2	3	3	2	2	2	13.3	13.3	13.3	52.22	445	445;352;156;226;45;56;74;75;171	1	14	0	6.4644	7.2	11.7	8.8	7.2	7.2	7.2	1653600	391610	474880	363020
P61353;K7ELC7;K7EQQ9;K7ERY7	P61353;K7ELC7;K7EQQ9	4;3;2;1	4;3;2;1	4;3;2;1	60S ribosomal protein L27	RPL27	;;	4	4	4	4	4	4	4	1	2	2	4	4	4	1	2	2	4	4	4	1	2	2	36	36	36	15.798	136	136;144;80;40	1	19	0	11.069	36	36	36	5.9	14	14	46281000	18670000	12224000	10634000
Q15021;E7EN77	Q15021	8;3	8;3	8;3	Condensin complex subunit 1	NCAPD2		2	8	8	8	6	3	6	1	1	1	6	3	6	1	1	1	6	3	6	1	1	1	7.4	7.4	7.4	157.18	1401	1401;919	1	18	0	22.195	6	2.9	5.6	0.7	0.7	0.7	3484200	1795600	198040	1273400
Q15758;M0QXM4;M0QX44	Q15758;M0QXM4	6;5;2	6;5;2	6;5;2	Neutral amino acid transporter B(0);Amino acid transporter	SLC1A5	;	3	6	6	6	5	5	6	0	1	2	5	5	6	0	1	2	5	5	6	0	1	2	13.9	13.9	13.9	56.598	541	541;365;258	1	19	0	17.948	12.2	12	13.9	0	3.7	5.9	22724000	10779000	4333400	6685400
C9J9K3;A0A0C4DG17;P08865;F8WD59	C9J9K3;A0A0C4DG17;P08865;F8WD59	7;7;7;5	7;7;7;5	7;7;7;5	40S ribosomal protein SA	RPSA	;;;	4	7	7	7	3	2	2	2	5	3	3	2	2	2	5	3	3	2	2	2	5	3	34.6	34.6	34.6	29.404	263	263;300;295;116	1	17	0	25.535	19.8	13.7	11.4	10.3	25.9	14.1	11461000	2855200	1204300	1803600
D6RCD0;Q8NBQ5	D6RCD0;Q8NBQ5	5;5	5;5	5;5	Estradiol 17-beta-dehydrogenase 11	HSD17B11	;	2	5	5	5	3	3	1	2	2	1	3	3	1	2	2	1	3	3	1	2	2	1	29.3	29.3	29.3	28.102	256	256;300	1	18	0	12.005	15.2	15.2	6.2	13.3	13.3	6.2	5423700	1759300	1096200	221100
J3QL54;J3KT10;Q9BW27;J3QS63;J3QL91;F5H0W7;J3QLH0;J3KS87;J3KTC7;J3QLV0;J3QLD4	J3QL54;J3KT10;Q9BW27;J3QS63;J3QL91;F5H0W7;J3QLH0	3;3;3;2;2;2;2;1;1;1;1	3;3;3;2;2;2;2;1;1;1;1	3;3;3;2;2;2;2;1;1;1;1	Nuclear pore complex protein Nup85	NUP85	;;;;;;	11	3	3	3	3	2	2	1	1	2	3	2	2	1	1	2	3	2	2	1	1	2	8.3	8.3	8.3	62.101	544	544;611;656;46;114;259;302;98;100;191;272	1	17	0	5.2692	8.3	5.1	5.9	2.8	2.8	5.9	1143900	384980	244400	191400
J3QLE5;P63162;P14678;J3KRY3;S4R3P3	J3QLE5;P63162;P14678	4;4;4;1;1	4;4;4;1;1	4;4;4;1;1	Small nuclear ribonucleoprotein-associated protein N;Small nuclear ribonucleoprotein-associated proteins B and B	SNRPN;SNRPB	;;	5	4	4	4	2	2	2	4	3	3	2	2	2	4	3	3	2	2	2	4	3	3	18.3	18.3	18.3	17.546	169	169;240;240;59;70	1	16	0	7.4705	5.3	8.9	8.9	18.3	17.8	9.5	18485000	1377100	1916000	1922600
P12004	P12004	6	6	6	Proliferating cell nuclear antigen	PCNA		1	6	6	6	4	5	4	1	3	1	4	5	4	1	3	1	4	5	4	1	3	1	26.1	26.1	26.1	28.768	261	261	1	18	0	18.143	13.8	18.8	18	2.7	10.7	2.7	16768000	5690500	3680300	3490000
P61978;Q5T6W2;S4R457	P61978;Q5T6W2	6;5;1	6;5;1	6;5;1	Heterogeneous nuclear ribonucleoprotein K	HNRNPK	;	3	6	6	6	2	2	2	5	4	3	2	2	2	5	4	3	2	2	2	5	4	3	17.5	17.5	17.5	50.976	463	463;379;77	1	18	0	24.727	6.3	5.8	8.2	14.5	14.3	10.8	9779600	1635800	846210	1141100
P62899;H7C2W9;C9JU56;B7Z4E3;B7Z4C8;B8ZZK4	P62899;H7C2W9;C9JU56;B7Z4E3;B7Z4C8;B8ZZK4	5;4;4;4;4;3	5;4;4;4;4;3	5;4;4;4;4;3	60S ribosomal protein L31	RPL31	;;;;;	6	5	5	5	3	4	3	2	2	3	3	4	3	2	2	3	3	4	3	2	2	3	39.2	39.2	39.2	14.463	125	125;108;115;120;130;79	1	17	0	16.305	24.8	31.2	24.8	18.4	18.4	26.4	90200000	27181000	19623000	18337000
A0A0A0MR02;P45880;Q5JSD2;Q5JSD1;A2A3S1	A0A0A0MR02;P45880	5;5;2;2;1	5;5;2;2;1	5;5;2;2;1	Voltage-dependent anion-selective channel protein 2	VDAC2	;	5	5	5	5	3	5	4	2	2	1	3	5	4	2	2	1	3	5	4	2	2	1	20.6	20.6	20.6	30.348	282	282;294;194;204;109	1	17	0	9.7862	10.6	20.6	17.7	7.8	6.4	3.5	18169000	5056800	5901000	4431000
A0A0C4DGT3;A0A087WWK8;Q6DN90;A0A0G2JLG2;Q9UPP2;Q5JU85	A0A0C4DGT3;A0A087WWK8;Q6DN90	8;7;7;1;1;1	8;7;7;1;1;1	8;7;7;1;1;1	IQ motif and SEC7 domain-containing protein 1	IQSEC1	;;	6	8	8	8	0	0	1	6	6	4	0	0	1	6	6	4	0	0	1	6	6	4	11.9	11.9	11.9	91.997	814	814;1114;963;1038;1182;1478	1	17	0	27.794	0	0	1.6	9.2	9.2	7.1	6161600	0	0	51714
A0A0R4J2E8;A8MXP9;P43243;D6REM6;D6R991;B3KM87;D6RB45;A0A1B0GX04;D6R9F3;D6RBS2;D6RCM3;D6REK4;D6R8Z5;D6RBK5;Q68E03;H0Y8T4	A0A0R4J2E8;A8MXP9;P43243;D6REM6;D6R991;B3KM87	4;4;4;3;2;2;1;1;1;1;1;1;1;1;1;1	4;4;4;3;2;2;1;1;1;1;1;1;1;1;1;1	4;4;4;3;2;2;1;1;1;1;1;1;1;1;1;1	Matrin-3	MATR3	;;;;;	16	4	4	4	4	2	3	1	1	1	4	2	3	1	1	1	4	2	3	1	1	1	9	9	9	94.622	847	847;895;847;794;433;509;47;77;78;87;99;100;107;121;283;334	1	17	0	7.3409	9	4.6	6.8	1.7	1.7	1.7	6118500	3145100	582270	1542300
D6RBD7;C9J1V9;O43324;H0YAL7;D6RCQ0	D6RBD7;C9J1V9;O43324;H0YAL7	5;5;5;4;2	5;5;5;4;2	5;5;5;4;2	Eukaryotic translation elongation factor 1 epsilon-1	EEF1E1;EEF1E1-BLOC1S5	;;;	5	5	5	5	4	5	5	2	1	0	4	5	5	2	1	0	4	5	5	2	1	0	52	52	52	16.686	150	150;151;174;136;94	1	17	0	13.163	44.7	52	52	20.7	7.3	0	8444600	2755000	2699300	2517300
C9JRZ6;Q9NX63;F8WAR4;F8WD73	C9JRZ6;Q9NX63;F8WAR4	5;5;4;2	5;5;4;2	5;5;4;2	MICOS complex subunit MIC19	CHCHD3	;;	4	5	5	5	4	3	4	1	2	2	4	3	4	1	2	2	4	3	4	1	2	2	26.7	26.7	26.7	26.694	232	232;227;241;63	1	16	0	24.283	21.1	14.7	20.3	3.4	12.1	9.9	1281700000	11948000	7902300	667720000
E5RHW4;O94905;E5RJ09;B0QZ43	E5RHW4;O94905;E5RJ09	5;5;3;1	5;5;3;1	4;4;3;0	Erlin-2	ERLIN2	;;	4	5	5	4	3	5	4	3	1	1	3	5	4	3	1	1	2	4	3	2	1	0	22.8	22.8	19.2	37.725	338	338;339;197;275	1	17	0	13.801	9.8	22.8	15.7	14.2	7.1	3.6	14875000	4721200	3158200	3300500
H0Y8C6;O00410	H0Y8C6;O00410	4;4	4;4	4;4	Importin-5	IPO5	;	2	4	4	4	4	3	3	1	1	3	4	3	3	1	1	3	4	3	3	1	1	3	5.5	5.5	5.5	123.75	1099	1099;1097	1	17	0	20.032	5.5	4.3	4.3	1.8	1.8	4.3	3947200	1425900	938050	848860
O00488;A9J4F5	O00488;A9J4F5	5;3	5;3	5;3	Zinc finger protein 593	ZNF593	;	2	5	5	5	3	3	5	2	1	2	3	3	5	2	1	2	3	3	5	2	1	2	53.7	53.7	53.7	15.199	134	134;156	1	17	0	14.408	32.1	35.8	53.7	25.4	14.9	25.4	46688000	15968000	9051400	12829000
O15269	O15269	6	6	6	Serine palmitoyltransferase 1	SPTLC1		1	6	6	6	4	4	3	2	2	2	4	4	3	2	2	2	4	4	3	2	2	2	18.8	18.8	18.8	52.743	473	473	1	17	0	31.634	11	12.9	8	6.3	6.1	6.3	12964000	3103600	3335400	1968100
O60942	O60942	6	6	6	mRNA-capping enzyme;Polynucleotide 5-triphosphatase;mRNA guanylyltransferase	RNGTT		1	6	6	6	0	2	2	3	5	5	0	2	2	3	5	5	0	2	2	3	5	5	12.7	12.7	12.7	68.556	597	597	1	17	0	11.196	0	3.7	3.2	5.2	11.4	9	6767600	0	449690	131410
Q5R3B4;O95563	Q5R3B4;O95563	3;3	3;3	3;3	Mitochondrial pyruvate carrier 2	MPC2	;	2	3	3	3	3	3	3	2	1	2	3	3	3	2	1	2	3	3	3	2	1	2	32.4	32.4	32.4	11.681	105	105;127	1	17	0	6.3836	32.4	32.4	32.4	22.9	11.4	21	12871000	4359200	2546700	2090200
P05089	P05089	8	8	8	Arginase-1	ARG1		1	8	8	8	2	2	3	3	3	4	2	2	3	3	3	4	2	2	3	3	3	4	32	32	32	34.735	322	322	1	17	0	20.231	7.1	7.1	12.7	13.4	10.2	12.7	12738000	1559200	451070	1765500
P12235;V9GYG0	P12235;V9GYG0	12;10	4;4	4;4	ADP/ATP translocase 1	SLC25A4	;	2	12	4	4	10	10	10	9	11	8	3	2	3	3	4	2	3	2	3	3	4	2	47	13.4	13.4	33.064	298	298;208	1	17	0	8.6107	39.9	39.6	33.6	32.2	37.9	27.9	47031000	9080100	5378900	6465900
P13646;K7ERE3;CON__ENSEMBL:ENSP00000377550;K7EMD9	P13646;K7ERE3;CON__ENSEMBL:ENSP00000377550;K7EMD9	12;11;10;6	6;5;4;2	0;0;0;0	Keratin, type I cytoskeletal 13	KRT13	;;;	4	12	6	0	9	8	9	8	9	8	4	2	3	2	3	2	0	0	0	0	0	0	22.7	13.5	0	49.588	458	458;415;420;165	1	16	0	24.436	17	14	15.5	14	15.9	14.2	29774000	14318000	1946900	9006100
P14373;A0A0G2JIZ4;A0A140T9B9;A0A140T9N6;A0A140T9V9;H0Y551;A0A140T9Q6;Q9HCM9	P14373;A0A0G2JIZ4	7;4;2;2;2;2;1;1	7;4;2;2;2;2;1;1	7;4;2;2;2;2;1;1	Zinc finger protein RFP	TRIM27	;	8	7	7	7	0	0	0	4	6	6	0	0	0	4	6	6	0	0	0	4	6	6	18.7	18.7	18.7	58.489	513	513;249;207;231;247;248;52;518	1	16	0	19.939	0	0	0	9	16.2	13.6	14539000	0	0	0
P18085;C9JPM4;C9JAK5;U3KQF2	P18085;C9JPM4;C9JAK5;U3KQF2	8;7;6;4	4;3;4;4	4;3;4;4	ADP-ribosylation factor 4	ARF4	;;;	4	8	4	4	7	7	6	8	6	6	3	3	2	4	3	2	3	3	2	4	3	2	47.2	18.3	18.3	20.511	180	180;127;153;71	1	17	0	12.339	47.2	47.2	41.7	47.2	47.2	41.7	44543000	9853900	6467100	6217500
P47929	P47929	3	3	3	Galectin-7	LGALS7		1	3	3	3	2	2	2	2	3	2	2	2	2	2	3	2	2	2	2	2	3	2	30.9	30.9	30.9	15.075	136	136	1	17	0	7.1215	22.1	22.1	22.1	22.1	30.9	22.1	9311100	2413200	1287400	1258700
P57740;H0YG15	P57740	5;1	5;1	5;1	Nuclear pore complex protein Nup107	NUP107		2	5	5	5	4	2	3	2	4	2	4	2	3	2	4	2	4	2	3	2	4	2	6.1	6.1	6.1	106.37	925	925;80	1	17	0	9.925	5.3	3.5	4.2	2.5	5	2.5	2867500	725000	223670	494560
P61163;R4GMT0;A0A1B0GVS3	P61163;R4GMT0	5;3;2	5;3;2	2;2;1	Alpha-centractin	ACTR1A	;	3	5	5	2	3	3	4	3	2	1	3	3	4	3	2	1	1	1	1	2	1	1	17.8	17.8	10.1	42.613	376	376;332;221	1	17	0	39.303	12	11.7	12	12.8	6.9	4.3	9825200	2557900	1134200	1584500
Q9NVH1;B1AK20;Q5TH61	Q9NVH1;B1AK20;Q5TH61	8;4;4	8;4;4	8;4;4	DnaJ homolog subfamily C member 11	DNAJC11	;;	3	8	8	8	4	4	3	3	1	1	4	4	3	3	1	1	4	4	3	3	1	1	24.9	24.9	24.9	63.277	559	559;324;332	1	16	0	25.076	9.3	15.2	8.2	8.2	2.1	3.6	7369400	3120200	1513100	1046900
A0A087X1G1;H7BYD0;Q16718;F8WAS3;A0A087WXR5;C9IZN5	A0A087X1G1;H7BYD0;Q16718;F8WAS3;A0A087WXR5;C9IZN5	4;4;4;2;2;2	4;4;4;2;2;2	4;4;4;2;2;2	NADH dehydrogenase [ubiquinone] 1 alpha subcomplex subunit 5	NDUFA5	;;;;;	6	4	4	4	4	4	3	0	2	1	4	4	3	0	2	1	4	4	3	0	2	1	59.4	59.4	59.4	11.965	101	101;112;116;70;77;93	1	16	0	36.588	59.4	59.4	44.6	0	35.6	25.7	7926600	3244300	2104300	1551100
A0A0C4DGS0;P56556;R4GN43	A0A0C4DGS0;P56556;R4GN43	3;3;2	3;3;2	3;3;2	NADH dehydrogenase [ubiquinone] 1 alpha subcomplex subunit 6	NDUFA6	;;	3	3	3	3	2	2	3	2	2	2	2	2	3	2	2	2	2	2	3	2	2	2	27.3	27.3	27.3	15.136	128	128;154;71	1	16	0	7.4912	14.8	14.8	27.3	14.8	14.8	14.8	13956000	4111400	2306000	2130300
A0A0D9SFE1;E9PJH7;Q9H936;A0A0D9SEI9;K4DIB8;K4DIA8;E9PS95;Q9H1K4;A0A0D9SFA8;K4DIB0;K4DIA2;A0A0D9SG84;E9PI74;E9PQ36;K4DIB6;K4DIB3	A0A0D9SFE1;E9PJH7;Q9H936;A0A0D9SEI9;K4DIB8;K4DIA8;E9PS95;Q9H1K4	5;5;5;4;3;3;3;3;2;2;2;2;2;2;2;2	5;5;5;4;3;3;3;3;2;2;2;2;2;2;2;2	5;5;5;4;3;3;3;3;2;2;2;2;2;2;2;2	Mitochondrial glutamate carrier 1;Mitochondrial glutamate carrier 2	SLC25A22;SLC25A18	;;;;;;;	16	5	5	5	2	3	4	1	2	3	2	3	4	1	2	3	2	3	4	1	2	3	33.2	33.2	33.2	26.214	247	247;313;323;197;177;190;196;315;97;103;114;117;127;134;156;161	1	16	0	10.669	11.3	16.6	30	8.1	8.5	16.6	8337100	2010200	2054300	2495000
A0A140TA86;Q5XKP0;K7EIR2;A0A140TA84	A0A140TA86;Q5XKP0	3;3;1;1	3;3;1;1	3;3;1;1	Protein QIL1	QIL1	;	4	3	3	3	2	1	1	1	1	2	2	1	1	1	1	2	2	1	1	1	1	2	42.1	42.1	42.1	15.436	140	140;118;88;110	1	13	0	10.697	37.1	14.3	14.3	14.3	14.3	19.3	3866200	1089100	252780	595960
B1AK87;B1AK88;P47756;B1AK85	B1AK87;B1AK88;P47756;B1AK85	7;7;6;5	7;7;6;5	7;7;6;5	F-actin-capping protein subunit beta	CAPZB	;;;	4	7	7	7	6	4	6	0	0	0	6	4	6	0	0	0	6	4	6	0	0	0	33.1	33.1	33.1	29.295	260	260;301;277;260	1	16	0	48.168	29.6	21.2	30	0	0	0	35338000	17797000	7826900	9713500
G3V198;Q12769;E9PR16	G3V198;Q12769;E9PR16	4;4;3	4;4;3	4;4;3	Nuclear pore complex protein Nup160	NUP160	;;	3	4	4	4	2	4	2	1	1	1	2	4	2	1	1	1	2	4	2	1	1	1	4.1	4.1	4.1	148.86	1314	1314;1436;1123	1	14	0	9.4839	2.2	4.1	2.3	1.4	1.4	1.4	1741300	759590	560090	234150
H7BXY5;Q0ZGT2;E7ETM8;E7EUA0	H7BXY5;Q0ZGT2;E7ETM8;E7EUA0	8;8;4;4	8;8;4;4	8;8;4;4	Nexilin	NEXN	;;;	4	8	8	8	5	5	6	0	0	0	5	5	6	0	0	0	5	5	6	0	0	0	22.2	22.2	22.2	68.814	576	576;675;321;435	1	16	0	31.138	13.9	13.7	16.5	0	0	0	14442000	6318100	4015900	4107700
O43264;F5H3C1	O43264	4;1	4;1	4;1	Centromere/kinetochore protein zw10 homolog	ZW10		2	4	4	4	3	2	3	2	3	3	3	2	3	2	3	3	3	2	3	2	3	3	6.9	6.9	6.9	88.828	779	779;135	1	16	0	33.934	4.9	3.7	5.8	3.7	4.9	4.9	7444800	2222800	990650	1803500
P25398	P25398	4	4	4	40S ribosomal protein S12	RPS12		1	4	4	4	2	1	1	3	2	2	2	1	1	3	2	2	2	1	1	3	2	2	41.7	41.7	41.7	14.515	132	132	1	15	0	34.778	28	16.7	16.7	30.3	22.7	22.7	12052000	1441100	666360	297640
P46777;Q5T7N0	P46777	6;1	6;1	6;1	60S ribosomal protein L5	RPL5		2	6	6	6	4	2	4	2	2	1	4	2	4	2	2	1	4	2	4	2	2	1	22.9	22.9	22.9	34.362	297	297;130	1	15	0	14.061	15.2	7.4	16.5	8.8	8.8	4	13845000	5302400	1242600	2273300
P51571;A6NLM8	P51571;A6NLM8	3;2	3;2	3;2	Translocon-associated protein subunit delta	SSR4	;	2	3	3	3	2	2	3	3	3	3	2	2	3	3	3	3	2	2	3	3	3	3	24.9	24.9	24.9	18.998	173	173;148	1	16	0	20.74	13.9	13.9	24.9	24.9	24.9	24.9	35512000	5438400	4114300	5998500
P62195;J3QSA9;J3QQM1;J3QRW1;J3QSE0;J3QLH6;J3KRP2	P62195;J3QSA9;J3QQM1	5;3;3;2;2;2;2	5;3;3;2;2;2;2	5;3;3;2;2;2;2	26S protease regulatory subunit 8	PSMC5	;;	7	5	5	5	2	2	3	3	2	4	2	2	3	3	2	4	2	2	3	3	2	4	19.5	19.5	19.5	45.626	406	406;257;263;143;169;215;241	1	16	0	40.5	8.1	8.1	11.3	11.8	7.4	16	10343000	1803500	1207300	1738300
Q15645;H0YAL2	Q15645;H0YAL2	4;2	4;2	4;2	Pachytene checkpoint protein 2 homolog	TRIP13	;	2	4	4	4	3	3	4	2	2	2	3	3	4	2	2	2	3	3	4	2	2	2	12.5	12.5	12.5	48.55	432	432;249	1	16	0	9.9608	8.8	10.6	12.5	8.3	8.3	8.3	5910000	1867800	821990	1385700
Q8NI60	Q8NI60	5	5	5	Atypical kinase ADCK3, mitochondrial	ADCK3		1	5	5	5	3	3	3	1	3	3	3	3	3	1	3	3	3	3	3	1	3	3	16.5	16.5	16.5	71.949	647	647	1	16	0	28.671	8.5	9.7	7.9	3.2	10	10	6665000	2893200	1890600	795620
Q96P63	Q96P63	4	4	4	Serpin B12	SERPINB12		1	4	4	4	2	2	3	3	3	2	2	2	3	3	3	2	2	2	3	3	3	2	14.6	14.6	14.6	46.276	405	405	1	15	0	5.936	5.9	5.9	10.4	10.1	10.1	5.9	7000600	1388300	811850	738460
Q9NYL9;H0YKU1;H0YNJ8;H0YNU8	Q9NYL9;H0YKU1;H0YNJ8	8;6;6;1	8;6;6;1	8;6;6;1	Tropomodulin-3	TMOD3	;;	4	8	8	8	6	5	5	0	0	0	6	5	5	0	0	0	6	5	5	0	0	0	34.4	34.4	34.4	39.594	352	352;187;213;33	1	16	0	27.187	23.9	17.3	18.2	0	0	0	20737000	8196300	6401200	6139200
A0A087WWA3;Q4R9M9;O60333;F8W8V9;Q12756;H7C0K6	A0A087WWA3;Q4R9M9;O60333;F8W8V9;Q12756	7;7;7;4;4;3	7;7;7;4;4;3	5;5;5;2;2;2	Kinesin-like protein;Kinesin-like protein KIF1B;Kinesin-like protein KIF1A	KIF1B;KIF1Bbeta;KIF1A	;;;;	6	7	7	5	0	0	0	6	4	5	0	0	0	6	4	5	0	0	0	4	2	4	4.5	4.5	3.1	202.01	1797	1797;1809;1816;1471;1690;227	1	15	0	29.285	0	0	0	3.5	2.6	3.3	9411400	0	0	0
A0A0C4DGQ8;Q6IAN0;J3KRS1;J3QLK1;J3QKT1	A0A0C4DGQ8;Q6IAN0;J3KRS1	5;5;3;1;1	5;5;3;1;1	5;5;3;1;1	Dehydrogenase/reductase SDR family member 7B	DHRS7B	;;	5	5	5	5	3	3	2	1	3	2	3	3	2	1	3	2	3	3	2	1	3	2	22.6	22.6	22.6	33.524	310	310;325;125;90;126	1	15	0	38.11	13.9	13.9	9.4	4.5	13.2	9.4	6729400	1747000	902810	937320
B4DY09;Q12905;X6R6Z1;A0A0A0MRL0	B4DY09;Q12905	6;6;2;1	6;6;2;1	6;6;2;1	Interleukin enhancer-binding factor 2	ILF2	;	4	6	6	6	2	3	3	3	2	2	2	3	3	3	2	2	2	3	3	3	2	2	22.7	22.7	22.7	38.91	352	352;390;115;150	1	15	0	11.459	6.8	11.6	9.9	10.8	6	6	8024900	1723400	1996100	2088300
E9PN51;F8W9K7;E9PPW7;O00217;E9PKH6	E9PN51;F8W9K7;E9PPW7;O00217;E9PKH6	3;3;3;3;2	3;3;3;3;2	3;3;3;3;2	NADH dehydrogenase [ubiquinone] iron-sulfur protein 8, mitochondrial	NDUFS8	;;;;	5	3	3	3	2	3	2	3	3	2	2	3	2	3	3	2	2	3	2	3	3	2	29.1	29.1	29.1	12.405	110	110;124;184;210;138	1	15	0	9.7176	18.2	29.1	18.2	29.1	29.1	18.2	7700800	1446200	1854400	897910
F2Z2B9;Q9BSJ2;B3KTU7;R4GMM4	F2Z2B9;Q9BSJ2;B3KTU7	8;8;4;2	8;8;4;2	8;8;4;2	Gamma-tubulin complex component 2	TUBGCP2	;;	4	8	8	8	3	3	5	3	0	0	3	3	5	3	0	0	3	3	5	3	0	0	16.9	16.9	16.9	82.603	721	721;902;495;78	1	14	0	16.033	7.9	5.4	9.4	6.7	0	0	4645800	1027300	1486500	1748400
F5H6E2;O00159;I3L168;I3L3F5;I3L4D4;I3L501;I3L3Y6;I3L204	F5H6E2;O00159	8;8;2;2;2;2;2;2	8;8;2;2;2;2;2;2	8;8;2;2;2;2;2;2	Unconventional myosin-Ic	MYO1C	;	8	8	8	8	4	7	4	0	0	0	4	7	4	0	0	0	4	7	4	0	0	0	9.9	9.9	9.9	118.99	1039	1039;1063;134;137;164;168;170;267	1	15	0	21.178	5.2	8.6	5.3	0	0	0	4781500	1593000	2020300	1168200
H3BTN5;P14618;H3BQ34;B4DNK4;H3BT25;H3BUW1;H3BTJ2;H3BR70;H3BN34;H3BQZ3;H3BU13;P30613	H3BTN5;P14618;H3BQ34;B4DNK4	7;7;5;5;3;3;3;3;1;1;1;1	7;7;5;5;3;3;3;3;1;1;1;1	7;7;5;5;3;3;3;3;1;1;1;1	Pyruvate kinase;Pyruvate kinase PKM	PKM	;;;	12	7	7	7	2	3	1	2	1	3	2	3	1	2	1	3	2	3	1	2	1	3	21.4	21.4	21.4	53.045	485	485;531;281;457;151;162;168;366;51;69;82;574	1	15	0	10.983	5.6	11.3	3.3	4.1	3.7	10.3	5751700	1267400	1373600	174480
O14828	O14828	5	5	5	Secretory carrier-associated membrane protein 3	SCAMP3		1	5	5	5	4	4	3	1	1	1	4	4	3	1	1	1	4	4	3	1	1	1	22.8	22.8	22.8	38.287	347	347	1	14	0	34.796	17	19	13.3	4.6	4.6	4.6	14548000	5415700	3103200	3176200
O95347;Q5T821;A0A0C4DGE5	O95347	3;1;1	3;1;1	3;1;1	Structural maintenance of chromosomes protein 2	SMC2		3	3	3	3	3	3	3	1	2	2	3	3	3	1	2	2	3	3	3	1	2	2	3.4	3.4	3.4	135.65	1197	1197;145;166	1	15	0	6.2389	3.4	3.4	3.4	1.7	2.6	2.6	6679900	2006000	1579200	1685700
P05976;P08590	P05976;P08590	2;2	2;2	2;2	Myosin light chain 1/3, skeletal muscle isoform;Myosin light chain 3	MYL1;MYL3	;	2	2	2	2	2	2	2	1	1	1	2	2	2	1	1	1	2	2	2	1	1	1	8.2	8.2	8.2	21.145	194	194;195	1	13	0	18.722	8.2	8.2	8.2	8.2	8.2	8.2	373120000	160830000	99017000	109220000
P06748;E5RGW4;E5RI98	P06748	5;1;1	5;1;1	5;1;1	Nucleophosmin	NPM1		3	5	5	5	3	4	4	1	1	1	3	4	4	1	1	1	3	4	4	1	1	1	28.9	28.9	28.9	32.575	294	294;59;111	1	15	0	14.22	21.1	24.1	25.9	4.4	3.1	3.1	10960000	2691300	3617600	2256800
P33991;E5RG31	P33991;E5RG31	5;4	5;4	5;4	DNA replication licensing factor MCM4	MCM4	;	2	5	5	5	3	2	4	2	3	1	3	2	4	2	3	1	3	2	4	2	3	1	6.6	6.6	6.6	96.557	863	863;278	1	15	0	8.5604	4.4	3.5	5.3	2.5	4.4	1.3	4766900	1430600	260200	1711200
P35250;A0A087WVY3;H7C5S7;H7C5P1;H7C5Q7;F8WC37;H7C5A0;H7C5G4;H7C5P4	P35250;A0A087WVY3	3;2;1;1;1;1;1;1;1	3;2;1;1;1;1;1;1;1	3;2;1;1;1;1;1;1;1	Replication factor C subunit 2	RFC2	;	9	3	3	3	2	2	1	2	1	2	2	2	1	2	1	2	2	2	1	2	1	2	11	11	11	39.157	354	354;251;28;52;75;77;87;101;198	1	14	0	11.772	8.5	8.5	3.7	8.5	4.8	7.3	2366900	719590	422000	383360
P40429;Q8J015;M0QYS1;M0QZU1;A0A096LPE0;Q6NVV1	P40429;Q8J015;M0QYS1	3;2;2;1;1;1	3;2;2;1;1;1	3;2;2;1;1;1	60S ribosomal protein L13a	RPL13A;RPL13a	;;	6	3	3	3	2	3	3	2	2	2	2	3	3	2	2	2	2	3	3	2	2	2	14.8	14.8	14.8	23.577	203	203;142;210;46;48;102	1	14	0	7.7643	10.8	14.8	14.8	10.8	10.8	10.8	27949000	8330900	6266200	6321900
P67775;P62714;E5RFI3;E5RHP4;E7ESG8;E5RHC1;H0YBN9;H0YC23	P67775;P62714;E5RFI3;E5RHP4;E7ESG8;E5RHC1	4;4;2;2;2;2;1;1	4;4;2;2;2;2;1;1	4;4;2;2;2;2;1;1	Serine/threonine-protein phosphatase 2A catalytic subunit alpha isoform;Serine/threonine-protein phosphatase 2A catalytic subunit beta isoform;Serine/threonine-protein phosphatase	PPP2CA;PPP2CB	;;;;;	8	4	4	4	3	4	2	2	2	2	3	4	2	2	2	2	3	4	2	2	2	2	19.1	19.1	19.1	35.594	309	309;309;125;126;145;184;52;124	1	15	0	37.078	16.5	19.1	8.4	12.9	7.4	12.9	23848000	7469900	5042900	2857300
P62917;E9PP36;E9PKU4;E9PKZ0;G3V1A1	P62917;E9PP36;E9PKU4;E9PKZ0	5;4;4;3;2	5;4;4;3;2	5;4;4;3;2	60S ribosomal protein L8	RPL8	;;;	5	5	5	5	3	3	2	2	2	3	3	3	2	2	2	3	3	3	2	2	2	3	26.5	26.5	26.5	28.024	257	257;148;235;205;167	1	15	0	23.954	13.2	20.6	10.5	7	7	10.1	33913000	11734000	7274100	5618700
Q03252	Q03252	8	7	7	Lamin-B2	LMNB2		1	8	7	7	4	5	7	0	0	0	4	4	6	0	0	0	4	4	6	0	0	0	13.9	12.6	12.6	69.948	620	620	1	14	0	14.521	7.6	7.9	12.4	0	0	0	6101700	2349000	1127300	2625300
Q08211	Q08211	5	5	5	ATP-dependent RNA helicase A	DHX9		1	5	5	5	2	3	2	3	3	2	2	3	2	3	3	2	2	3	2	3	3	2	6.1	6.1	6.1	140.96	1270	1270	1	15	0	12.224	2.7	4.2	2.7	3.2	3.2	2.2	3676200	531190	612220	432100
Q13547;Q5TEE2;E5RFI6;E5RJ04;E5RGV4;E5RHE7;E5RH52;E5RG37;E5RFP9;H3BM24;E5RK19	Q13547;Q5TEE2	5;3;2;2;2;2;2;2;2;2;1	5;3;2;2;2;2;2;2;2;2;1	2;0;0;0;0;0;0;0;0;0;0	Histone deacetylase 1	HDAC1	;	11	5	5	2	3	2	4	2	3	1	3	2	4	2	3	1	1	0	1	0	1	0	15.1	15.1	7.5	55.102	482	482;211;60;65;71;86;100;103;109;161;52	1	15	0	9.6925	9.1	5.2	11.6	5.2	8.7	2.5	11294000	3534100	1233400	2753000
Q5T160;H0Y450	Q5T160	7;1	7;1	7;1	Probable arginine--tRNA ligase, mitochondrial	RARS2		2	7	7	7	1	4	3	2	2	2	1	4	3	2	2	2	1	4	3	2	2	2	14.7	14.7	14.7	65.505	578	578;206	1	14	0	12.597	2.9	10.6	5	5	5	5	2188100	235330	624490	306430
Q92538	Q92538	5	5	5	Golgi-specific brefeldin A-resistance guanine nucleotide exchange factor 1	GBF1		1	5	5	5	3	4	5	1	1	1	3	4	5	1	1	1	3	4	5	1	1	1	4.4	4.4	4.4	206.44	1859	1859	1	15	0	11.855	3.2	3.4	4.4	0.9	0.9	0.9	2114300	612460	564890	773640
Q96NB2;R4GMR9;R4GN74;R4GNC2;R4GN63;A0A1B0GX61;R4GMW0;A0A0C4DGR6;R4GMS6	Q96NB2	5;2;2;2;2;2;2;2;1	5;2;2;2;2;2;2;2;1	5;2;2;2;2;2;2;2;1	Sideroflexin-2	SFXN2		9	5	5	5	1	2	3	1	3	2	1	2	3	1	3	2	1	2	3	1	3	2	24.8	24.8	24.8	36.231	322	322;112;135;138;153;167;168;186;67	1	15	0	9.1817	5.3	9	14.3	5.3	15.8	13	2704100	165950	126100	951860
Q9UBM7;E9PRL8;E9PQ71;E9PIP9;E9PJ54;E9PM00;E9PLZ2;H0YE57	Q9UBM7;E9PRL8;E9PQ71;E9PIP9;E9PJ54;E9PM00	4;2;2;2;2;2;1;1	4;2;2;2;2;2;1;1	4;2;2;2;2;2;1;1	7-dehydrocholesterol reductase	DHCR7	;;;;;	8	4	4	4	3	4	3	2	2	1	3	4	3	2	2	1	3	4	3	2	2	1	7.4	7.4	7.4	54.489	475	475;91;105;107;164;258;73;221	1	15	0	10.978	5.9	7.4	5.9	3.6	3.6	1.7	19494000	5651300	4949300	2845600
A0A087WWJ1;P52701	A0A087WWJ1;P52701	5;5	5;5	5;5	DNA mismatch repair protein Msh6	MSH6	;	2	5	5	5	3	1	2	3	1	3	3	1	2	3	1	3	3	1	2	3	1	3	6.3	6.3	6.3	121.12	1067	1067;1360	1	14	0	10.476	2.9	1.1	2.4	4.5	1.1	4.5	3105400	1272100	150780	336880
A0A087WY00;G3V394;F8WE88;F8W6H6;Q9Y4I1;E7ERV5;H0YMK3;Q9ULV0;G3V3C9;H0YM93;H0YM96;Q9UES5;O95317	A0A087WY00;G3V394;F8WE88;F8W6H6;Q9Y4I1	7;7;7;7;7;3;2;2;1;1;1;1;1	7;7;7;7;7;3;2;2;1;1;1;1;1	5;5;5;5;5;3;0;1;0;0;0;1;1	Unconventional myosin-Va	MYO5A	;;;;	13	7	7	5	2	7	5	0	0	0	2	7	5	0	0	0	2	5	4	0	0	0	5.2	5.2	3.8	212.2	1828	1828;1853;1855;1855;1855;585;269;1848;47;106;153;228;231	1	14	0	14.071	1.8	5.2	4	0	0	0	3279000	498550	1534800	1245600
B4DXW1;P61158;F8WDR7;Q9P1U1;A0A0A0MTI9;H7C4J1;C9IZN3;Q9C0K3	B4DXW1;P61158	6;6;2;2;1;1;1;1	6;6;2;2;1;1;1;1	6;6;2;2;1;1;1;1	Actin-related protein 3	ACTR3	;	8	6	6	6	5	4	4	0	0	0	5	4	4	0	0	0	5	4	4	0	0	0	17.7	17.7	17.7	42.003	367	367;418;84;418;189;208;222;210	1	14	0	20.739	14.2	10.9	12.3	0	0	0	9490000	4924200	2440000	2125800
B4E1G1;Q9BUN8;E5RGY0	B4E1G1;Q9BUN8;E5RGY0	3;3;2	3;3;2	3;3;2	Derlin-1	DERL1	;;	3	3	3	3	2	2	2	2	3	3	2	2	2	2	3	3	2	2	2	2	3	3	25.2	25.2	25.2	17.033	151	151;251;151	1	14	0	6.5015	12.6	12.6	12.6	19.9	25.2	25.2	11061000	3382000	2041100	2115000
C9JZ20;E7ESE2;E9PCW0;C9JW96;P35232;D6RBK0	C9JZ20;E7ESE2;E9PCW0;C9JW96;P35232;D6RBK0	5;5;5;5;5;3	5;5;5;5;5;3	5;5;5;5;5;3	Prohibitin	PHB	;;;;;	6	5	5	5	2	4	5	1	1	1	2	4	5	1	1	1	2	4	5	1	1	1	31.8	31.8	31.8	22.27	201	201;202;216;246;272;124	1	14	0	10.151	15.9	26.9	31.8	10	10	10	8087500	1194200	2884100	3329900
E9PNW8;Q8WVX9	E9PNW8;Q8WVX9	4;4	4;4	4;4	Fatty acyl-CoA reductase 1	FAR1	;	2	4	4	4	2	4	3	1	2	2	2	4	3	1	2	2	2	4	3	1	2	2	17.3	17.3	17.3	37.481	335	335;515	1	14	0	13.849	7.5	17.3	11.3	3.6	7.5	7.5	8141000	2101200	1947200	1908300
F5H5D3;Q9BQE3;F8VVB9;F8VRZ4;F8VS66;F8VX09;F8VWV9;C9JEV8;C9JQ00;C9JJQ8;F8VRK0;F8VXZ7;F8W0F6	F5H5D3;Q9BQE3	29;29;13;7;7;5;5;4;4;4;2;1;1	3;3;0;0;0;0;0;0;0;0;0;0;0	3;3;0;0;0;0;0;0;0;0;0;0;0	Tubulin alpha-1C chain	TUBA1C	;	13	29	3	3	25	26	23	23	23	24	2	3	2	2	2	1	2	3	2	2	2	1	61.7	13.1	13.1	57.73	519	519;449;246;112;130;75;81;153;180;198;49;26;231	1	12	0	19.127	58	61.7	57	55.5	55.5	47	55355000	13156000	9660400	10067000
H0Y2W2;Q5SV16	H0Y2W2	27;11	2;0	0;0		ATAD3A		2	27	2	0	24	25	22	19	24	23	2	2	2	1	1	2	0	0	0	0	0	0	49.8	2.1	0	64.243	572	572;201	1	14	0	6.1959	44.2	49.7	44.8	40.6	46	46.3	53934000	5408000	4548000	8024000
H0Y8C3;Q9NZJ7	H0Y8C3;Q9NZJ7	8;8	8;8	8;8	Mitochondrial carrier homolog 1	MTCH1	;	2	8	8	8	1	0	2	6	3	2	1	0	2	6	3	2	1	0	2	6	3	2	26.6	26.6	26.6	43.121	394	394;389	1	14	0	12.067	3	0	4.8	23.9	15.2	11.9	11036000	872500	0	3066400
H3BLZ8;Q92841;J3KRZ1;A0A0U1RQJ0	H3BLZ8;Q92841	10;10;2;1	6;6;0;0	6;6;0;0	Probable ATP-dependent RNA helicase DDX17	DDX17	;	4	10	6	6	6	4	5	6	7	5	2	1	2	3	4	2	2	1	2	3	4	2	14.9	9.2	9.2	80.439	731	731;729;166;56	1	14	0	9.7747	9.3	6.3	7.9	9	10.8	7.9	12887000	5753300	580460	706370
J9JIE6;Q9UM00;J3QQY2;J3KS45;J3KTQ7	J9JIE6;Q9UM00;J3QQY2;J3KS45	4;4;3;2;1	4;4;3;2;1	4;4;3;2;1	Transmembrane and coiled-coil domain-containing protein 1	TMCO1	;;;	5	4	4	4	2	2	2	3	2	2	2	2	2	3	2	2	2	2	2	3	2	2	19.2	19.2	19.2	27.079	239	239;188;104;143;152	1	13	0	6.8279	9.6	9.6	9.6	15.5	9.6	12.1	16574000	2405600	1301700	1305500
O00743;Q5T1S7	O00743	4;1	4;1	4;1	Serine/threonine-protein phosphatase 6 catalytic subunit;Serine/threonine-protein phosphatase 6 catalytic subunit, N-terminally processed	PPP6C		2	4	4	4	1	2	2	2	4	3	1	2	2	2	4	3	1	2	2	2	4	3	13.8	13.8	13.8	35.144	305	305;125	1	14	0	15.444	3	7.9	7.9	7.9	13.8	10.5	5012100	732200	480580	512420
P30050	P30050	3	3	3	60S ribosomal protein L12	RPL12		1	3	3	3	2	2	3	2	2	0	2	2	3	2	2	0	2	2	3	2	2	0	28.5	28.5	28.5	17.818	165	165	1	14	0	12.973	18.8	18.8	28.5	18.8	18.8	0	16751000	4048900	3306700	4992000
Q15388	Q15388	3	3	3	Mitochondrial import receptor subunit TOM20 homolog	TOMM20		1	3	3	3	2	3	2	2	3	2	2	3	2	2	3	2	2	3	2	2	3	2	27.6	27.6	27.6	16.298	145	145	1	14	0	8.0894	18.6	27.6	18.6	18.6	27.6	22.8	5991600	711610	435420	513160
Q5T4S7;A0A0A0MSW0;X6R960;X6RE05	Q5T4S7;A0A0A0MSW0	9;5;2;1	9;5;2;1	9;5;2;1	E3 ubiquitin-protein ligase UBR4	UBR4	;	4	9	9	9	4	5	5	0	0	1	4	5	5	0	0	1	4	5	5	0	0	1	2.2	2.2	2.2	573.83	5183	5183;2058;890;984	1	15	0	16.117	1	1.3	1	0	0	0.3	2143200	899410	626580	617250
Q86XI2;F8WE06;H0Y6U5	Q86XI2;F8WE06	6;3;2	6;3;2	6;3;2	Condensin-2 complex subunit G2	NCAPG2	;	3	6	6	6	3	2	4	2	0	3	3	2	4	2	0	3	3	2	4	2	0	3	7.5	7.5	7.5	130.96	1143	1143;389;898	1	14	0	10.286	3.1	2.3	5.5	3.1	0	3.5	1771500	517720	392990	242950
Q8WUK0;E9PQM0	Q8WUK0	5;2	5;2	5;2	Phosphatidylglycerophosphatase and protein-tyrosine phosphatase 1	PTPMT1		2	5	5	5	2	2	2	3	2	2	2	2	2	3	2	2	2	2	2	3	2	2	30.8	30.8	30.8	22.843	201	201;168	1	14	0	8.9158	12.9	12.9	12.9	18.9	10	14.9	4246000	682040	546970	510080
Q9NRG9;F8VZ44;H3BU82;F8VUB6	Q9NRG9;F8VZ44;H3BU82	5;4;3;1	5;4;3;1	5;4;3;1	Aladin	AAAS	;;	4	5	5	5	2	2	1	3	3	2	2	2	1	3	3	2	2	2	1	3	3	2	12.6	12.6	12.6	59.573	546	546;422;358;277	1	14	0	11.452	5.5	5.5	3.5	7.9	8.2	5.5	4550300	550110	315650	160750
CON__ENSEMBL:ENSBTAP00000014147	CON__ENSEMBL:ENSBTAP00000014147	3	3	3				1	3	3	3	2	2	2	2	3	2	2	2	2	2	3	2	2	2	2	2	3	2	34.5	34.5	34.5	11.756	113	113	1	13	0	10.084	26.5	26.5	26.5	26.5	34.5	26.5	27285000	5059100	2781400	4545000
CON__P02666	CON__P02666	1	1	1				1	1	1	1	1	1	0	1	1	1	1	1	0	1	1	1	1	1	0	1	1	1	9.1	9.1	9.1	23.583	209	209	1	12	0	3.815	9.1	9.1	0	9.1	9.1	9.1	2803100	358220	128470	0
CON__Q6KB66-1;Q6KB66;CON__Q0VBK2	CON__Q6KB66-1;Q6KB66	6;6;1	6;6;1	6;6;1	Keratin, type II cytoskeletal 80	KRT80	;	3	6	6	6	5	1	3	0	1	3	5	1	3	0	1	3	5	1	3	0	1	3	18.1	18.1	18.1	50.525	452	452;452;452	1	13	0	21.564	15	2.7	7.1	0	5.3	11.3	3991800	1994700	337750	793380
E7EPB3;P50914	E7EPB3;P50914	2;2	2;2	2;2	60S ribosomal protein L14	RPL14	;	2	2	2	2	2	2	2	2	2	1	2	2	2	2	2	1	2	2	2	2	2	1	19.4	19.4	19.4	14.558	124	124;215	1	11	0	8.458	19.4	19.4	19.4	19.4	19.4	9.7	31383000	10091000	7269100	6620300
G5E9V2;F2Z3A7;Q96DA6	G5E9V2;F2Z3A7;Q96DA6	2;2;2	2;2;2	2;2;2	Mitochondrial import inner membrane translocase subunit TIM14	DNAJC19	;;	3	2	2	2	1	1	2	1	1	1	1	1	2	1	1	1	1	1	2	1	1	1	57.4	57.4	57.4	5.0539	47	47;59;116	1	7	0	3.9661	40.4	40.4	57.4	40.4	40.4	40.4	352530	77942	52482	56941
G5E9C7;P36507;M0R1B6	G5E9C7;P36507	3;3;1	3;3;1	3;3;1	Dual specificity mitogen-activated protein kinase kinase 2	MAP2K2	;	3	3	3	3	3	2	2	1	1	0	3	2	2	1	1	0	3	2	2	1	1	0	20.1	20.1	20.1	33.881	303	303;400;104	1	9	0	4.1262	20.1	11.6	11.6	6.3	6.3	0	689650	351190	124100	158100
K7ESP4;Q8WVC6	K7ESP4;Q8WVC6	3;3	3;3	3;3	Dephospho-CoA kinase domain-containing protein	DCAKD	;	2	3	3	3	3	3	2	2	1	2	3	3	2	2	1	2	3	3	2	2	1	2	16.3	16.3	16.3	24.177	209	209;231	1	13	0	6.1656	16.3	16.3	11.5	11	6.2	11	3051000	1184200	741660	305840
O14773	O14773	4	4	4	Tripeptidyl-peptidase 1	TPP1		1	4	4	4	3	2	3	1	2	2	3	2	3	1	2	2	3	2	3	1	2	2	11.5	11.5	11.5	61.247	563	563	1	13	0	16.108	9.1	6.6	9.8	4.8	7.3	7.3	10466000	3251900	1265700	2912200
P21796;C9JI87	P21796;C9JI87	4;3	4;3	4;3	Voltage-dependent anion-selective channel protein 1	VDAC1	;	2	4	4	4	3	3	3	2	1	1	3	3	3	2	1	1	3	3	3	2	1	1	14.1	14.1	14.1	30.772	283	283;183	1	13	0	8.8299	11.3	10.2	11.3	6.4	3.5	3.5	12482000	4507000	2234800	2907500
P40938;A0A087X270	P40938	3;1	3;1	3;1	Replication factor C subunit 3	RFC3		2	3	3	3	2	2	2	2	2	3	2	2	2	2	2	3	2	2	2	2	2	3	10.4	10.4	10.4	40.556	356	356;103	1	13	0	53.926	7.9	7.9	7.9	7.9	7.9	10.4	7591900	1829600	991240	1021300
P51153;A0A087WWB9	P51153	3;1	3;1	2;1	Ras-related protein Rab-13	RAB13		2	3	3	2	2	2	2	3	2	2	2	2	2	3	2	2	1	1	1	2	1	1	15.8	15.8	10.3	22.774	203	203;122	1	13	0	11.39	10.8	10.8	10.8	15.8	10.3	10.8	14276000	3064900	2116600	2097700
P51570;K7ERJ9	P51570;K7ERJ9	4;3	4;3	4;3	Galactokinase	GALK1	;	2	4	4	4	0	0	0	4	4	2	0	0	0	4	4	2	0	0	0	4	4	2	18.6	18.6	18.6	42.272	392	392;120	1	12	0	6.864	0	0	0	18.6	18.6	10.7	5656900	0	0	0
Q59GN2;P62891	Q59GN2;P62891	2;2	2;2	2;2	Putative 60S ribosomal protein L39-like 5;60S ribosomal protein L39	RPL39P5;RPL39	;	2	2	2	2	1	1	0	2	2	1	1	1	0	2	2	1	1	1	0	2	2	1	23.5	23.5	23.5	6.3225	51	51;51	1	11	0	3.7821	19.6	19.6	0	23.5	23.5	19.6	757140000	66919000	62084000	0
Q71DI3;K7EMV3;B4DEB1;K7EK07;K7ES00;Q16695;P84243;P68431;K7EP01;Q5TEC6;Q6NXT2	Q71DI3;K7EMV3;B4DEB1;K7EK07;K7ES00;Q16695;P84243;P68431	3;2;2;2;2;2;2;2;1;1;1	3;2;2;2;2;2;2;2;1;1;1	3;2;2;2;2;2;2;2;1;1;1	Histone H3.2;Histone H3;Histone H3.1t;Histone H3.3;Histone H3.1	HIST2H3A;H3F3B;H3F3A;HIST3H3;HIST1H3A	;;;;;;;	11	3	3	3	3	2	3	2	2	1	3	2	3	2	2	1	3	2	3	2	2	1	33.8	33.8	33.8	15.388	136	136;92;123;132;151;136;136;136;113;136;135	1	13	0	7.8346	33.8	28.7	33.8	10.3	10.3	5.1	37589000	13776000	5595900	9747800
Q8NI27;A0A0C4DG98;F2Z2V2	Q8NI27;A0A0C4DG98	4;3;1	4;3;1	4;3;1	THO complex subunit 2	THOC2	;	3	4	4	4	3	3	3	1	2	1	3	3	3	1	2	1	3	3	3	1	2	1	2.6	2.6	2.6	182.77	1593	1593;1478;120	1	13	0	5.9936	2.1	2	2	0.6	1.1	0.6	2111500	845630	388090	465100
Q96A65	Q96A65	8	8	8	Exocyst complex component 4	EXOC4		1	8	8	8	6	4	2	1	0	0	6	4	2	1	0	0	6	4	2	1	0	0	11.5	11.5	11.5	110.5	974	974	1	13	0	12.361	8	6.3	2.4	1.2	0	0	4315900	2982400	806510	527040
Q9Y6G9;E9PHI6;C9JGM7	Q9Y6G9;E9PHI6	3;2;1	3;2;1	3;2;1	Cytoplasmic dynein 1 light intermediate chain 1	DYNC1LI1	;	3	3	3	3	3	2	2	1	0	1	3	2	2	1	0	1	3	2	2	1	0	1	11.5	11.5	11.5	56.578	523	523;407;190	1	12	0	7.7892	11.5	7.3	7.3	4.2	0	4.2	1920600	919510	446310	440860
E7EX29;P63104;B0AZS6;B7Z2E6;H0YB80;E7ESK7;E5RGE1;E5RIR4;E9PD24;E7EVZ2	E7EX29;P63104;B0AZS6;B7Z2E6;H0YB80;E7ESK7	4;4;3;2;2;2;1;1;1;1	4;4;3;2;2;2;1;1;1;1	3;3;2;1;1;2;1;1;1;1	14-3-3 protein zeta/delta	YWHAZ	;;;;;	10	4	4	3	1	4	3	2	1	1	1	4	3	2	1	1	0	3	2	1	0	0	22.4	22.4	18.3	28.036	246	246;245;168;125;130;137;51;75;92;98	1	12	0	11.183	4.1	22.4	14.6	8.9	4.1	4.1	5262700	1261600	1393300	1368500
E9PHA2;Q15003;C9J470;H7C415	E9PHA2;Q15003;C9J470	3;3;2;1	3;3;2;1	3;3;2;1	Condensin complex subunit 2	NCAPH	;;	4	3	3	3	3	2	2	1	1	0	3	2	2	1	1	0	3	2	2	1	1	0	5.5	5.5	5.5	81.572	730	730;741;607;182	1	12	0	5.5964	5.5	3.7	4	2.2	2.2	0	1842100	971210	485760	248380
P08237;F8VW30;F8VSL1;F8VZI0;F8VX13;F8VNX2;F8VZQ1;F8VP00	P08237	7;1;1;1;1;1;1;1	5;1;1;1;1;1;1;1	5;1;1;1;1;1;1;1	ATP-dependent 6-phosphofructokinase, muscle type	PFKM		8	7	5	5	2	2	2	5	4	6	1	1	0	4	2	4	1	1	0	4	2	4	12.7	10.4	10.4	85.182	780	780;116;139;152;156;157;161;176	1	12	0	8.4062	2.6	2.6	2.3	10.1	6.8	10.4	8044400	530230	352220	0
P14649;F8W1I5	P14649;F8W1I5	6;5	4;3	4;3	Myosin light chain 6B	MYL6B	;	2	6	4	4	5	5	6	1	1	1	3	3	4	0	0	0	3	3	4	0	0	0	40.4	28.8	28.8	22.764	208	208;175	1	12	0	11.33	34.1	36.1	40.4	6.2	6.2	6.2	7534100	3172500	1950900	2410700
P23246;H0Y9K7;H0Y9U2	P23246	7;2;1	6;2;1	6;2;1	Splicing factor, proline- and glutamine-rich	SFPQ		3	7	6	6	3	2	5	1	2	1	2	2	4	1	2	1	2	2	4	1	2	1	14.6	13.4	13.4	76.149	707	707;223;88	1	12	0	12.709	5.5	4.1	11.2	1.3	5.4	3.3	5187900	1398800	920180	1524700
P26640;A0A140T936;A2ABF4;A0A0G2JJT9;H0Y426;A0A140T954	P26640;A0A140T936	3;2;1;1;1;1	3;2;1;1;1;1	3;2;1;1;1;1	Valine--tRNA ligase	VARS	;	6	3	3	3	2	1	2	1	1	2	2	1	2	1	1	2	2	1	2	1	1	2	5.4	5.4	5.4	140.47	1264	1264;1183;174;174;288;366	1	12	0	5.7938	2.5	1.3	4.1	1.3	1.3	2.5	1679400	836090	147180	306850
P35606;H0YAC7;H0Y938	P35606	5;1;1	5;1;1	5;1;1	Coatomer subunit beta	COPB2		3	5	5	5	3	3	4	0	0	1	3	3	4	0	0	1	3	3	4	0	0	1	8.3	8.3	8.3	102.49	906	906;118;177	1	12	0	13.048	5.6	5.6	7.2	0	0	3.4	3827300	1663600	1061100	955690
P46734;A0A1B0GVD9;E9PRZ0	P46734;A0A1B0GVD9;E9PRZ0	2;1;1	2;1;1	2;1;1	Dual specificity mitogen-activated protein kinase kinase 3	MAP2K3	;;	3	2	2	2	2	2	2	2	2	1	2	2	2	2	2	1	2	2	2	2	2	1	9.8	9.8	9.8	39.318	347	347;145;160	1	12	0	4.2335	9.8	9.8	9.8	9.8	9.8	5.2	3966600	1183500	413320	396130
P47914	P47914	2	2	2	60S ribosomal protein L29	RPL29		1	2	2	2	2	1	2	2	2	2	2	1	2	2	2	2	2	1	2	2	2	2	14.5	14.5	14.5	17.752	159	159	1	11	0	5.2444	14.5	9.4	14.5	14.5	14.5	14.5	208070000	64516000	27417000	39706000
P63261;I3L3I0;I3L1U9;I3L4N8;I3L3R2	P63261;I3L3I0;I3L1U9;I3L4N8	28;16;16;15;13	1;1;1;1;1	0;0;0;0;0	Actin, cytoplasmic 2;Actin, cytoplasmic 2, N-terminally processed	ACTG1	;;;	5	28	1	0	27	27	27	14	13	14	1	1	1	0	0	0	0	0	0	0	0	0	82.4	4.5	0	41.792	375	375;214;214;241;164	1	4	0	44.512	80.8	81.9	80.8	59.2	52.3	53.6	64166000	28963000	19128000	16075000
P84085;C9J1Z8;F5H1V1;F5H6T5;F8WDB3	P84085;C9J1Z8	8;7;1;1;1	3;2;0;0;0	3;2;0;0;0	ADP-ribosylation factor 5	ARF5	;	5	8	3	3	6	7	7	6	6	7	1	2	2	2	3	2	1	2	2	2	3	2	48.3	19.4	19.4	20.529	180	180;150;40;50;59	1	12	0	10.44	38.9	42.8	44.4	44.4	48.3	42.8	4994600	490990	762860	188830
Q00839;Q5RI18	Q00839	4;1	4;1	4;1	Heterogeneous nuclear ribonucleoprotein U	HNRNPU		2	4	4	4	3	3	3	1	1	1	3	3	3	1	1	1	3	3	3	1	1	1	7.5	7.5	7.5	90.583	825	825;241	1	12	0	11.652	5.3	5.3	4.8	1.5	1.5	1.5	8853500	3400400	2066100	1664600
Q12904;D6R937	Q12904	6;2	6;2	6;2	Aminoacyl tRNA synthase complex-interacting multifunctional protein 1;Endothelial monocyte-activating polypeptide 2	AIMP1		2	6	6	6	2	4	5	1	0	0	2	4	5	1	0	0	2	4	5	1	0	0	37.5	37.5	37.5	34.352	312	312;150	1	12	0	11.285	11.2	19.9	32.7	5.8	0	0	11648000	3033400	3549100	4063400
Q14697;F5H6X6;E9PKU7	Q14697;F5H6X6;E9PKU7	5;4;4	5;4;4	5;4;4	Neutral alpha-glucosidase AB	GANAB	;;	3	5	5	5	2	2	2	3	1	2	2	2	2	3	1	2	2	2	2	3	1	2	7.6	7.6	7.6	106.87	944	944;847;852	1	12	0	6.7862	4.1	2.6	3.3	4.2	1.7	2.6	3658100	529380	460000	937380
Q16643;D6R9W4;D6RFI1;D6R9Q9	Q16643;D6R9W4;D6RFI1	7;5;4;1	7;5;4;1	7;5;4;1	Drebrin	DBN1	;;	4	7	7	7	4	4	4	0	0	0	4	4	4	0	0	0	4	4	4	0	0	0	14.6	14.6	14.6	71.428	649	649;317;124;391	1	12	0	12.76	8.9	10.6	8.5	0	0	0	13158000	5409700	3650000	4098700
Q5HYB6	Q5HYB6	23	2	0		DKFZp686J1372		1	23	2	0	18	20	22	0	1	1	2	2	2	0	0	0	0	0	0	0	0	0	54.7	5.6	0	27.175	232	232	1	12	0	26.997	48.7	54.3	54.3	0	5.2	4.3	85555000	37212000	24979000	23365000
Q92615;H0Y641;H0Y4V9	Q92615	5;1;1	5;1;1	5;1;1	La-related protein 4B	LARP4B		3	5	5	5	0	2	2	1	2	4	0	2	2	1	2	4	0	2	2	1	2	4	11.4	11.4	11.4	80.551	738	738;190;339	1	11	0	14.231	0	4.5	3.5	4.2	4.5	10	2933300	0	287690	325460
Q9BRX2	Q9BRX2	3	3	3	Protein pelota homolog	PELO		1	3	3	3	3	1	3	1	1	2	3	1	3	1	1	2	3	1	3	1	1	2	10.9	10.9	10.9	43.359	385	385	1	12	0	5.3877	10.9	3.4	10.9	4.7	4.7	8.1	4095000	1757900	595420	725310
Q9BVI4;F5H303	Q9BVI4;F5H303	4;2	4;2	4;2	Nucleolar complex protein 4 homolog	NOC4L	;	2	4	4	4	4	4	3	0	0	0	4	4	3	0	0	0	4	4	3	0	0	0	15.7	15.7	15.7	58.467	516	516;270	1	12	0	9.1077	15.7	15.7	14	0	0	0	1483700	768430	492060	223180
Q9Y277;E5RK27;E5RFP6;E5RJN6;E5RHZ6;E5RHE1	Q9Y277	5;2;2;2;2;1	5;2;2;2;2;1	5;2;2;2;2;1	Voltage-dependent anion-selective channel protein 3	VDAC3		6	5	5	5	4	3	3	1	0	0	4	3	3	1	0	0	4	3	3	1	0	0	29.3	29.3	29.3	30.658	283	283;108;134;158;165;100	1	12	0	27.113	24.7	16.6	17.7	5.7	0	0	18681000	10474000	4165800	3549300
Q9Y679	Q9Y679	4	4	4	Ancient ubiquitous protein 1	AUP1		1	4	4	4	2	2	1	3	2	2	2	2	1	3	2	2	2	2	1	3	2	2	11.6	11.6	11.6	53.028	476	476	1	12	0	5.4084	5	6.3	2.5	7.8	5	5	6404200	2004000	965820	0
Q9Y6J9;E9PP94	Q9Y6J9;E9PP94	2;1	2;1	2;1	TAF6-like RNA polymerase II p300/CBP-associated factor-associated factor 65 kDa subunit 6L	TAF6L	;	2	2	2	2	1	1	1	2	2	1	1	1	1	2	2	1	1	1	1	2	2	1	5	5	5	67.814	622	622;145	1	12	0	3.7883	2.6	2.6	2.6	5	5	2.6	884710	90491	79111	98507
A8MU58;F8W950;Q13155	A8MU58;F8W950;Q13155	2;2;2	2;2;2	2;2;2	Aminoacyl tRNA synthase complex-interacting multifunctional protein 2	AIMP2	;;	3	2	2	2	2	1	2	2	2	2	2	1	2	2	2	2	2	1	2	2	2	2	8.7	8.7	8.7	26.76	242	242;251;320	1	11	0	4.8912	8.7	3.7	8.7	8.7	8.7	8.7	3771400	1198300	776860	809020
G3V576;G3V4W0;B4DY08;B2R5W2;G3V4C1;G3V2Q1;P07910;G3V5X6;G3V3K6;G3V251;B4DSU6;G3V555;G3V575;G3V4M8;G3V2H6;G3V5V7;G3V2D6;A0A0G2JPF8;A0A0G2JNQ3;P0DMR1;O60812;B7ZW38;B2RXH8	G3V576;G3V4W0;B4DY08;B2R5W2;G3V4C1;G3V2Q1;P07910;G3V5X6;G3V3K6;G3V251;B4DSU6;G3V555;G3V575;G3V4M8	4;4;4;4;4;4;4;3;3;3;3;3;3;2;1;1;1;1;1;1;1;1;1	4;4;4;4;4;4;4;3;3;3;3;3;3;2;1;1;1;1;1;1;1;1;1	4;4;4;4;4;4;4;3;3;3;3;3;3;2;1;1;1;1;1;1;1;1;1	Heterogeneous nuclear ribonucleoproteins C1/C2	HNRNPC	;;;;;;;;;;;;;	23	4	4	4	3	3	4	0	0	1	3	3	4	0	0	1	3	3	4	0	0	1	20.8	20.8	20.8	25.256	231	231;262;288;290;292;305;306;117;121;126;147;175;187;66;54;180;214;293;293;293;293;293;293	1	11	0	8.9431	16.5	16.5	20.8	0	0	6.9	7398400	2693300	2103800	2426600
C9JLU1;P52434	C9JLU1;P52434	1;1	1;1	1;1	DNA-directed RNA polymerases I, II, and III subunit RPABC3	POLR2H	;	2	1	1	1	1	1	1	1	1	1	1	1	1	1	1	1	1	1	1	1	1	1	8.1	8.1	8.1	16.925	148	148;150	1	6	0	2.7999	8.1	8.1	8.1	8.1	8.1	8.1	850970	176530	113410	129770
CON__P12035;P12035;H0YID6	CON__P12035;P12035	12;12;4	2;2;0	0;0;0	Keratin, type II cytoskeletal 3	KRT3	;	3	12	2	0	10	8	8	10	12	10	1	2	2	2	2	2	0	0	0	0	0	0	11.3	1.9	0	64.503	629	629;628;119	1	11	0	7.8903	11.1	9.5	9.4	11	11.3	10.7	4970400	0	1343600	0
CON__P19013;P19013;F8VX05;F8VZR6	CON__P19013;P19013	9;9;1;1	5;5;1;1	4;4;1;1	Keratin, type II cytoskeletal 4	KRT4	;	4	9	5	4	4	6	5	5	7	7	1	2	1	1	3	3	0	1	1	1	2	2	16.5	11.8	9.8	63.91	594	594;534;78;86	1	11	0	9.1855	6.7	9.1	7.1	7.4	11.8	11.8	8968400	1497900	1098100	41892
F5GWF6;P78371;F8VQ14	F5GWF6;P78371;F8VQ14	5;5;4	5;5;4	5;5;4	T-complex protein 1 subunit beta	CCT2	;;	3	5	5	5	3	2	3	1	1	1	3	2	3	1	1	1	3	2	3	1	1	1	12.6	12.6	12.6	56.806	530	530;535;416	1	11	0	10.312	9.2	5.1	8.3	2.8	2.8	1.5	2239000	679800	354360	507730
H0Y2S9;H0Y7E2;H7C3G6;J3QRL2;K7EL39;J3QL44	H0Y2S9;H0Y7E2	33;18;14;7;3;1	5;3;1;0;0;1	4;3;0;0;0;0		MPRIP	;	6	33	5	4	27	27	32	0	0	0	3	3	4	0	0	0	3	2	3	0	0	0	21.6	5.1	4.7	203.37	1794	1794;1091;277;181;95;59	1	10	0	8.2182	20.6	17.8	20	0	0	0	10535000	525640	4785100	5224300
H0Y449;P67809	H0Y449;P67809	2;2	2;2	2;2	Nuclease-sensitive element-binding protein 1	YBX1	;	2	2	2	2	2	2	2	2	1	2	2	2	2	2	1	2	2	2	2	2	1	2	11.2	11.2	11.2	41.905	374	374;324	1	11	0	21.847	11.2	11.2	11.2	11.2	6.1	11.2	5970800	2136900	1203600	1064600
S4R3Q9;J3KNA0;Q15070;C9JC63;E7EVY0	S4R3Q9;J3KNA0;Q15070;C9JC63;E7EVY0	3;3;3;2;2	3;3;3;2;2	3;3;3;2;2	Mitochondrial inner membrane protein OXA1L	OXA1L	;;;;	5	3	3	3	3	2	3	1	1	1	3	2	3	1	1	1	3	2	3	1	1	1	6.4	6.4	6.4	48.519	435	435;495;435;112;408	1	11	0	4.3718	6.4	4.1	6.4	1.8	1.8	1.8	12242000	4614000	1908100	2753700
J3KPD3;Q9Y580;F5H606;I3L521;F5GXV8;F5GY08;G3V1T9;F5H674	J3KPD3;Q9Y580;F5H606;I3L521;F5GXV8;F5GY08	7;7;4;4;4;4;3;1	7;7;4;4;4;4;3;1	7;7;4;4;4;4;3;1	RNA-binding protein 7	RBM7	;;;;;	8	7	7	7	5	2	3	0	0	0	5	2	3	0	0	0	5	2	3	0	0	0	37.8	37.8	37.8	30.59	267	267;266;123;148;149;220;146;70	1	11	0	11.954	23.2	18.4	21.3	0	0	0	10289000	5791700	1916200	2580800
P24666;F2Z2Q9;G5E9R5;D3YTI2	P24666;F2Z2Q9;G5E9R5	3;2;2;1	3;2;2;1	3;2;2;1	Low molecular weight phosphotyrosine protein phosphatase	ACP1	;;	4	3	3	3	1	0	0	3	3	3	1	0	0	3	3	3	1	0	0	3	3	3	20.3	20.3	20.3	18.042	158	158;70;80;85	1	10	0	10.19	5.7	0	0	20.3	20.3	20.3	15012000	0	0	0
P31151	P31151	2	2	2	Protein S100-A7	S100A7		1	2	2	2	2	1	1	2	2	2	2	1	1	2	2	2	2	1	1	2	2	2	19.8	19.8	19.8	11.471	101	101	1	11	0	5.6389	19.8	19.8	18.8	19.8	19.8	19.8	932780	168320	37906	29959
P38646;D6RA73;D6RJI2;H0YBG6	P38646	4;1;1;1	4;1;1;1	4;1;1;1	Stress-70 protein, mitochondrial	HSPA9		4	4	4	4	1	0	1	4	2	3	1	0	1	4	2	3	1	0	1	4	2	3	7.5	7.5	7.5	73.68	679	679;62;95;163	1	11	0	13.376	2.1	0	1.8	7.5	3.8	5.9	6791500	0	0	409760
P62318	P62318	2	2	2	Small nuclear ribonucleoprotein Sm D3	SNRPD3		1	2	2	2	2	1	2	2	2	2	2	1	2	2	2	2	2	1	2	2	2	2	15.1	15.1	15.1	13.916	126	126	1	11	0	3.3667	15.1	7.1	15.1	15.1	15.1	15.1	8886300	2438800	619540	1498100
Q15120	Q15120	3	3	3	[Pyruvate dehydrogenase (acetyl-transferring)] kinase isozyme 3, mitochondrial	PDK3		1	3	3	3	2	0	0	3	1	3	2	0	0	3	1	3	2	0	0	3	1	3	14.3	14.3	14.3	46.938	406	406	1	11	0	6.3701	10.1	0	0	14.3	4.2	14.3	646630	83683	0	0
Q15365	Q15365	5	4	4	Poly(rC)-binding protein 1	PCBP1		1	5	4	4	4	4	1	1	2	1	3	3	1	1	2	1	3	3	1	1	2	1	26.4	20.8	20.8	37.497	356	356	1	11	0	13.513	20.5	17.7	3.7	3.7	12.4	3.7	8570700	3444800	1675000	833070
Q96P70	Q96P70	5	5	5	Importin-9	IPO9		1	5	5	5	5	2	1	0	0	0	5	2	1	0	0	0	5	2	1	0	0	0	9.8	9.8	9.8	115.96	1041	1041	1	11	0	10.455	9.8	4.4	1.7	0	0	0	2885500	2059900	418390	407220
Q9NPA8;E5RHX8;J3KNT2;E5RI00;E5RHT9;E5RJ84	Q9NPA8;E5RHX8	3;2;1;1;1;1	3;2;1;1;1;1	3;2;1;1;1;1	Transcription and mRNA export factor ENY2	ENY2	;	6	3	3	3	3	2	1	2	2	1	3	2	1	2	2	1	3	2	1	2	2	1	32.7	32.7	32.7	11.528	101	101;100;48;51;53;56	1	11	0	3.8029	32.7	25.7	8.9	25.7	25.7	8.9	7838600	2861000	1281900	655990
V9GYY5;Q9UGY1	V9GYY5;Q9UGY1	5;5	5;5	5;5	Nucleolar protein 12	NOL12	;	2	5	5	5	2	3	4	0	0	0	2	3	4	0	0	0	2	3	4	0	0	0	28.6	28.6	28.6	23.82	206	206;213	1	11	0	13.44	12.1	12.1	28.6	0	0	0	14244000	4430500	3736600	6077100
Q9Y3U8;J3KTD3;J3QSB5	Q9Y3U8	3;1;1	3;1;1	3;1;1	60S ribosomal protein L36	RPL36		3	3	3	3	2	3	3	1	1	0	2	3	3	1	1	0	2	3	3	1	1	0	21	21	21	12.254	105	105;68;94	1	11	0	6.855	21	21	21	12.4	12.4	0	30476000	11322000	7836300	8400600
Q9Y5A9;S4R3V3;S4R3J8;A0A024R7W5;A0A087X0Q1;A0A087WY31;Q9BYJ9;Q7Z739	Q9Y5A9;S4R3V3	4;2;1;1;1;1;1;1	4;2;1;1;1;1;1;1	4;2;1;1;1;1;1;1	YTH domain-containing family protein 2	YTHDF2	;	8	4	4	4	2	1	2	1	2	3	2	1	2	1	2	3	2	1	2	1	2	3	7.1	7.1	7.1	62.333	579	579;241;200;534;583;588;559;585	1	11	0	8.2212	3.3	2.1	4	2.1	4	5.2	5516200	1600300	471480	844400
Q9Y6C9;E9PIE4	Q9Y6C9;E9PIE4	3;2	3;2	3;2	Mitochondrial carrier homolog 2	MTCH2	;	2	3	3	3	2	1	1	1	3	2	2	1	1	1	3	2	2	1	1	1	3	2	17.8	17.8	17.8	33.331	303	303;262	1	10	0	7.6068	14.9	7.9	7.9	7.9	17.8	14.9	2382300	1099500	56747	69522
Q9Y6N1;B4DI26	Q9Y6N1;B4DI26	2;1	2;1	2;1	Cytochrome c oxidase assembly protein COX11, mitochondrial	COX11	;	2	2	2	2	2	1	1	2	2	2	2	1	1	2	2	2	2	1	1	2	2	2	14.1	14.1	14.1	31.43	276	276;230	1	11	0	6.1256	14.1	5.1	5.1	14.1	14.1	14.1	1059600	206490	93825	97772
B7Z9I1;Q5T4U5;P11310;H0YDT5	B7Z9I1;Q5T4U5;P11310	4;4;4;1	4;4;4;1	4;4;4;1	Medium-chain specific acyl-CoA dehydrogenase, mitochondrial	ACADM	;;	4	4	4	4	2	3	1	1	1	2	2	3	1	1	1	2	2	3	1	1	1	2	19	19	19	42.426	385	385;454;421;67	1	10	0	9.2294	11.9	14.3	4.7	4.7	4.7	7	2443800	780400	635710	165690
CON__Q3ZBS7	CON__Q3ZBS7	2	2	2				1	2	2	2	1	2	2	2	1	2	1	2	2	2	1	2	1	2	2	2	1	2	3.3	3.3	3.3	54.099	484	484	1	10	0	3.467	1.7	3.3	3.3	3.3	1.7	3.3	3522200	552160	793740	680120
H0UI06;P14406;D6R9C3;D6RIE3;D6RGV5	H0UI06;P14406;D6R9C3;D6RIE3;D6RGV5	3;3;2;2;2	3;3;2;2;2	3;3;2;2;2	Cytochrome c oxidase subunit 7A2, mitochondrial	COX7A2	;;;;	5	3	3	3	1	1	2	2	1	3	1	1	2	2	1	3	1	1	2	2	1	3	40.9	40.9	40.9	12.844	115	115;83;53;91;103	1	10	0	9.8889	11.3	11.3	20	32.2	11.3	40.9	16979000	1848600	1218800	3529400
H3BQA8;H0YMF9;H0YL19;H0YN81;Q9GZS3	H3BQA8;H0YMF9;H0YL19;H0YN81;Q9GZS3	1;1;1;1;1	1;1;1;1;1	1;1;1;1;1	WD repeat-containing protein 61;WD repeat-containing protein 61, N-terminally processed	WDR61	;;;;	5	1	1	1	1	1	1	1	1	1	1	1	1	1	1	1	1	1	1	1	1	1	12.3	12.3	12.3	17.666	163	163;189;212;294;305	1	10	0	3.9815	12.3	12.3	12.3	12.3	12.3	12.3	811710	233410	147060	86818
O00767	O00767	3	3	3	Acyl-CoA desaturase	SCD		1	3	3	3	2	3	2	0	1	2	2	3	2	0	1	2	2	3	2	0	1	2	14.2	14.2	14.2	41.522	359	359	1	10	0	14.333	10.6	14.2	7.2	0	3.6	7.2	15192000	7071600	4604700	1829000
O14949	O14949	4	4	4	Cytochrome b-c1 complex subunit 8	UQCRQ		1	4	4	4	1	1	3	2	2	1	1	1	3	2	2	1	1	1	3	2	2	1	56.1	56.1	56.1	9.9062	82	82	1	10	0	4.6581	8.5	25.6	50	34.1	47.6	15.9	8483400	1925600	69384	2798100
O15397;F5H2I3;F5H244	O15397	3;1;1	3;1;1	3;1;1	Importin-8	IPO8		3	3	3	3	2	2	2	1	0	1	2	2	2	1	0	1	2	2	2	1	0	1	4.4	4.4	4.4	119.94	1037	1037;46;167	1	10	0	5.0507	3.5	2.5	2.5	1.5	0	1.5	2295300	932970	617330	631770
O75600	O75600	2	2	2	2-amino-3-ketobutyrate coenzyme A ligase, mitochondrial	GCAT		1	2	2	2	2	2	2	1	1	0	2	2	2	1	1	0	2	2	2	1	1	0	8.4	8.4	8.4	45.285	419	419	1	10	0	6.2587	8.4	8.4	8.4	5	5	0	1957900	595380	529280	348830
O96000;H3BV16;H3BPJ9	O96000;H3BV16;H3BPJ9	3;2;2	3;2;2	3;2;2	NADH dehydrogenase [ubiquinone] 1 beta subcomplex subunit 10	NDUFB10	;;	3	3	3	3	2	1	1	2	2	2	2	1	1	2	2	2	2	1	1	2	2	2	22.7	22.7	22.7	20.776	172	172;142;161	1	10	0	6.5127	16.9	8.1	8.1	14	14	16.9	9107300	1469500	1043800	959710
O96008	O96008	2	2	2	Mitochondrial import receptor subunit TOM40 homolog	TOMM40		1	2	2	2	2	2	1	1	1	0	2	2	1	1	1	0	2	2	1	1	1	0	5	5	5	37.893	361	361	1	8	0	3.0816	5	5	5	4.7	5	0	1188000	511440	254560	279370
P04279	P04279	6	6	4	Semenogelin-1;Alpha-inhibin-92;Alpha-inhibin-31;Seminal basic protein	SEMG1		1	6	6	4	4	3	3	0	0	0	4	3	3	0	0	0	2	2	2	0	0	0	20.3	20.3	13	52.13	462	462	1	10	0	17.908	15.2	10.4	12.1	0	0	0	7107200	3991100	1693900	1422200
P11233;H7C3P7;P11234;C9JPE8;C9JYR1;C9J6B1;C9JQB3;F8WEQ6	P11233;H7C3P7;P11234;C9JPE8;C9JYR1;C9J6B1;C9JQB3	4;3;3;2;2;2;2;1	4;3;3;2;2;2;2;1	4;3;3;2;2;2;2;1	Ras-related protein Ral-A;Ras-related protein Ral-B	RALA;RALB	;;;;;;	8	4	4	4	3	3	4	0	0	0	3	3	4	0	0	0	3	3	4	0	0	0	25.7	25.7	25.7	23.567	206	206;164;206;101;112;167;171;46	1	10	0	7.8189	16	16	25.7	0	0	0	8332900	3503600	2385600	2443600
P35268;K7EJT5;K7EP65;K7EKS7;K7ELC4;K7EMH1;K7ERI7	P35268;K7EJT5;K7EP65;K7EKS7;K7ELC4;K7EMH1;K7ERI7	2;1;1;1;1;1;1	2;1;1;1;1;1;1	2;1;1;1;1;1;1	60S ribosomal protein L22	RPL22	;;;;;;	7	2	2	2	2	2	2	1	1	1	2	2	2	1	1	1	2	2	2	1	1	1	30.5	30.5	30.5	14.787	128	128;47;48;53;79;89;95	1	9	0	6.5103	30.5	30.5	30.5	10.2	10.2	10.2	26584000	8133100	4694500	4330800
P54886	P54886	2	2	2	Delta-1-pyrroline-5-carboxylate synthase;Glutamate 5-kinase;Gamma-glutamyl phosphate reductase	ALDH18A1		1	2	2	2	1	1	1	2	2	2	1	1	1	2	2	2	1	1	1	2	2	2	2.5	2.5	2.5	87.301	795	795	1	9	0	3.9089	1.5	1.5	1.5	2.5	2.5	2.5	7775100	68838	52815	53751
Q96FJ2;P63167	Q96FJ2;P63167	3;3	3;3	3;3	Dynein light chain 2, cytoplasmic;Dynein light chain 1, cytoplasmic	DYNLL2;DYNLL1	;	2	3	3	3	1	1	1	1	2	3	1	1	1	1	2	3	1	1	1	1	2	3	30.3	30.3	30.3	10.35	89	89;89	1	10	0	4.938	12.4	12.4	12.4	18	30.3	30.3	3748500	751300	1213600	617300
P78346;Q5VU11;Q5VU10	P78346;Q5VU11;Q5VU10	4;3;2	4;3;2	4;3;2	Ribonuclease P protein subunit p30	RPP30	;;	3	4	4	4	1	0	1	3	4	1	1	0	1	3	4	1	1	0	1	3	4	1	23.1	23.1	23.1	29.321	268	268;254;212	1	10	0	18.038	3.4	0	3.4	19.4	23.1	3.4	2592200	137070	0	105660
Q08188	Q08188	4	4	4	Protein-glutamine gamma-glutamyltransferase E;Protein-glutamine gamma-glutamyltransferase E 50 kDa catalytic chain;Protein-glutamine gamma-glutamyltransferase E 27 kDa non-catalytic chain	TGM3		1	4	4	4	1	1	0	2	3	3	1	1	0	2	3	3	1	1	0	2	3	3	7.5	7.5	7.5	76.631	693	693	1	10	0	8.7728	1.9	1.9	0	3.2	4.5	6.2	3079300	713480	164050	0
Q15773;F5H0Y3;F5H7L5;F5H800	Q15773;F5H0Y3	3;2;1;1	3;2;1;1	3;2;1;1	Myeloid leukemia factor 2	MLF2	;	4	3	3	3	2	2	3	0	2	1	2	2	3	0	2	1	2	2	3	0	2	1	17.3	17.3	17.3	28.147	248	248;230;79;121	1	10	0	4.6947	10.9	10.9	17.3	0	13.7	7.3	7867700	2038100	1517900	2949100
Q5JVF3	Q5JVF3	2	2	2	PCI domain-containing protein 2	PCID2		1	2	2	2	2	2	2	2	1	1	2	2	2	2	1	1	2	2	2	2	1	1	7.3	7.3	7.3	46.029	399	399	1	10	0	8.3143	7.3	7.3	7.3	7.3	2.5	2.5	2249000	538800	293030	374510
Q5W0B1	Q5W0B1	2	2	2	RING finger protein 219	RNF219		1	2	2	2	1	1	2	2	2	1	1	1	2	2	2	1	1	1	2	2	2	1	3.4	3.4	3.4	81.116	726	726	1	9	0	4.4188	1.2	1.2	3.4	3.4	3.4	1.2	5020800	809250	618000	1195800
Q6P1J9;A0A1B0GUB2	Q6P1J9;A0A1B0GUB2	3;2	3;2	3;2	Parafibromin	CDC73	;	2	3	3	3	2	2	0	3	2	1	2	2	0	3	2	1	2	2	0	3	2	1	10.2	10.2	10.2	60.576	531	531;450	1	10	0	7.2384	5.6	5.6	0	10.2	5.6	3.8	908750	73369	171760	0
Q6P1M0	Q6P1M0	4	4	4	Long-chain fatty acid transport protein 4	SLC27A4		1	4	4	4	1	1	1	2	1	4	1	1	1	2	1	4	1	1	1	2	1	4	7.8	7.8	7.8	72.063	643	643	1	10	0	6.4022	1.4	1.4	1.4	5	1.4	7.8	3709000	534170	373750	462440
Q6UWP8	Q6UWP8	2	2	2	Suprabasin	SBSN		1	2	2	2	1	1	1	1	1	2	1	1	1	1	1	2	1	1	1	1	1	2	9.2	9.2	9.2	60.54	590	590	1	10	0	5.0097	6.1	6.1	6.1	6.1	6.1	9.2	1774500	304440	228850	177280
Q7KZN9	Q7KZN9	4	4	4	Cytochrome c oxidase assembly protein COX15 homolog	COX15		1	4	4	4	3	2	3	0	0	1	3	2	3	0	0	1	3	2	3	0	0	1	13.7	13.7	13.7	46.03	410	410	1	10	0	6.3549	10	6.3	10	0	0	3.7	2089100	1018200	392760	478260
Q8IXI1	Q8IXI1	2	2	2	Mitochondrial Rho GTPase 2	RHOT2		1	2	2	2	2	1	1	2	1	2	2	1	1	2	1	2	2	1	1	2	1	2	6.8	6.8	6.8	68.117	618	618	1	9	0	6.2707	6.8	5.2	5.2	6.8	1.6	6.8	1123600	246370	132410	109470
Q92609;C9J3F6	Q92609;C9J3F6	4;2	4;2	4;2	TBC1 domain family member 5	TBC1D5	;	2	4	4	4	4	2	2	1	0	1	4	2	2	1	0	1	4	2	2	1	0	1	9.6	9.6	9.6	89.003	795	795;593	1	10	0	9.636	9.6	6.3	6.3	2.3	0	2.3	1398100	604290	316210	408940
Q9BW60	Q9BW60	1	1	1	Elongation of very long chain fatty acids protein 1	ELOVL1		1	1	1	1	1	1	1	1	1	1	1	1	1	1	1	1	1	1	1	1	1	1	4.7	4.7	4.7	32.662	279	279	1	6	0	3.7462	4.7	4.7	4.7	4.7	4.7	4.7	761700	190800	146600	158780
Q9H5Q4	Q9H5Q4	3	3	3	Dimethyladenosine transferase 2, mitochondrial	TFB2M		1	3	3	3	2	1	1	3	1	2	2	1	1	3	1	2	2	1	1	3	1	2	8.6	8.6	8.6	45.348	396	396	1	10	0	5.0052	6.1	2.3	2.3	8.6	2.5	4.8	4024600	1236800	381300	380390
Q9NX20;E9PI14	Q9NX20;E9PI14	3;2	3;2	3;2	39S ribosomal protein L16, mitochondrial	MRPL16	;	2	3	3	3	1	3	0	2	3	1	1	3	0	2	3	1	1	3	0	2	3	1	20.3	20.3	20.3	28.449	251	251;86	1	10	0	12.179	2.8	20.3	0	15.9	20.3	13.1	6142500	482080	936670	0
Q9P035;H3BRL8;H3BPZ1;H3BS72;H3BMZ1	Q9P035;H3BRL8;H3BPZ1;H3BS72	3;2;2;2;1	3;2;2;2;1	3;2;2;2;1	Very-long-chain (3R)-3-hydroxyacyl-CoA dehydratase 3	HACD3	;;;	5	3	3	3	3	2	3	1	0	1	3	2	3	1	0	1	3	2	3	1	0	1	12.4	12.4	12.4	43.159	362	362;245;337;400;139	1	10	0	17.123	12.4	9.7	12.4	3.9	0	3.9	6463900	2625600	1474900	1650100
Q9P2J5	Q9P2J5	6	6	6	Leucine--tRNA ligase, cytoplasmic	LARS		1	6	6	6	3	4	2	0	0	0	3	4	2	0	0	0	3	4	2	0	0	0	6.7	6.7	6.7	134.46	1176	1176	1	10	0	14.696	3.9	3.5	1.8	0	0	0	1708400	669910	543200	495320
Q9UID3;H0YEE1	Q9UID3	5;1	5;1	5;1	Vacuolar protein sorting-associated protein 51 homolog	VPS51		2	5	5	5	4	3	2	0	1	0	4	3	2	0	1	0	4	3	2	0	1	0	11.8	11.8	11.8	86.041	782	782;199	1	10	0	6.1861	10.6	6.3	5.4	0	2.7	0	10959000	6978300	3822100	115860
Q9Y4W6;K7EP56;B7Z651;A0A0U1RQN6;E9PHW9;I6L894;Q01484	Q9Y4W6	4;1;1;1;1;1;1	4;1;1;1;1;1;1	4;1;1;1;1;1;1	AFG3-like protein 2	AFG3L2		7	4	4	4	2	1	2	2	1	2	2	1	2	2	1	2	2	1	2	2	1	2	4.6	4.6	4.6	88.583	797	797;209;1114;1194;1730;3924;3957	1	10	0	7.0975	2.4	1	2.4	2.3	1.4	2.4	3473000	1513700	1006200	48141
Q9Y512	Q9Y512	5	5	5	Sorting and assembly machinery component 50 homolog	SAMM50		1	5	5	5	3	4	3	0	0	0	3	4	3	0	0	0	3	4	3	0	0	0	13.6	13.6	13.6	51.976	469	469	1	10	0	7.7965	7.9	11.1	7.9	0	0	0	6485600	2361400	2191100	1933100
Q9Y5V3	Q9Y5V3	4	4	4	Melanoma-associated antigen D1	MAGED1		1	4	4	4	2	2	3	1	1	1	2	2	3	1	1	1	2	2	3	1	1	1	6.2	6.2	6.2	86.16	778	778	1	10	0	67.61	3	3	5.1	1.9	1.9	1.9	3929300	1178000	719900	1054700
A0A075B6H6;P01834	A0A075B6H6;P01834	1;1	1;1	1;1	Ig kappa chain C region	IGKC	;	2	1	1	1	1	1	1	1	1	1	1	1	1	1	1	1	1	1	1	1	1	1	18.7	18.7	18.7	11.609	107	107;106	1	9	0	108.39	18.7	18.7	18.7	18.7	18.7	18.7	7266300	1684200	1115900	1602700
A0A075B746;P82921	A0A075B746;P82921	2;2	2;2	2;2	28S ribosomal protein S21, mitochondrial	MRPS21	;	2	2	2	2	2	1	2	2	1	1	2	1	2	2	1	1	2	1	2	2	1	1	29.9	29.9	29.9	10.688	87	87;87	1	9	0	6.8324	29.9	13.8	29.9	29.9	13.8	13.8	8406700	1772200	457690	1207600
K7EJM5;A0A087WX29;K7EN94;B1AKP7;G3V162;A0A087X260;A0A087WYY0;Q13148;A0A087WXQ5;A0A087WV68;K7EJ99;A0A0A0MSV7;A0A087WW61;A0A087WX67;A0A087WXV3	K7EJM5;A0A087WX29;K7EN94;B1AKP7;G3V162;A0A087X260;A0A087WYY0;Q13148;A0A087WXQ5;A0A087WV68	4;4;4;4;4;4;4;4;2;2;1;1;1;1;1	4;4;4;4;4;4;4;4;2;2;1;1;1;1;1	4;4;4;4;4;4;4;4;2;2;1;1;1;1;1	TAR DNA-binding protein 43	TARDBP	;;;;;;;;;	15	4	4	4	2	1	1	2	1	2	2	1	1	2	1	2	2	1	1	2	1	2	28.4	28.4	28.4	22.844	201	201;243;275;295;298;301;304;414;200;212;80;84;138;149;175	1	9	0	10.934	10.4	6	6	17.9	4.5	10.4	2829500	757500	164310	265560
A0A0C4DGS9;Q9Y6K0	A0A0C4DGS9;Q9Y6K0	2;2	2;2	2;2	Choline/ethanolaminephosphotransferase 1	CEPT1	;	2	2	2	2	2	2	2	0	1	1	2	2	2	0	1	1	2	2	2	0	1	1	9.6	9.6	9.6	31.293	280	280;416	1	9	0	3.9931	9.6	9.6	9.6	0	5.7	5.7	3666200	1473800	815830	1223500
B0QYW5;F6RTR7;F8WE74;O43808	B0QYW5;F6RTR7;F8WE74;O43808	2;2;2;2	2;2;2;2	2;2;2;2	Peroxisomal membrane protein PMP34	SLC25A17	;;;	4	2	2	2	2	1	2	1	1	1	2	1	2	1	1	1	2	1	2	1	1	1	14.2	14.2	14.2	25.721	225	225;234;239;307	1	9	0	7.7924	14.2	6.2	14.2	6.2	6.2	6.2	3449200	1017300	495600	805250
C9J3L8;C9J5W0;E9PAL7;C9IZQ1;P43307	C9J3L8;C9J5W0;E9PAL7;C9IZQ1;P43307	2;2;2;2;2	2;2;2;2;2	2;2;2;2;2	Translocon-associated protein subunit alpha	SSR1	;;;;	5	2	2	2	1	1	1	1	2	1	1	1	1	1	2	1	1	1	1	1	2	1	8.7	8.7	8.7	29.573	265	265;266;291;298;286	1	9	0	16.4	5.7	5.7	5.7	5.7	8.7	5.7	6002800	234590	782590	738690
C9JAZ1;O75431;C9JNK6;F8WE26	C9JAZ1;O75431;C9JNK6	4;4;3;1	4;4;3;1	4;4;3;1	Metaxin-2	MTX2	;;	4	4	4	4	2	2	4	0	1	0	2	2	4	0	1	0	2	2	4	0	1	0	38.9	38.9	38.9	25.717	229	229;263;207;45	1	9	0	10.737	21.8	21.8	38.9	0	12.2	0	2117400	689950	475260	915890
CON__P04259	CON__P04259	29	2	0				1	29	2	0	24	21	22	22	23	23	2	2	2	1	1	1	0	0	0	0	0	0	44.9	4.8	0	59.998	564	564	1	9	0	8.6908	39.9	37.2	37.2	33.5	33.9	35.3	38341000	11470000	8567800	8797000
CON__Q2UVX4	CON__Q2UVX4	2	2	2				1	2	2	2	1	2	2	2	1	1	1	2	2	2	1	1	1	2	2	2	1	1	2	2	2	187.37	1662	1662	1	9	0	4.261	1	2	2	2	1	1	366450	51634	58918	64834
CON__Q7Z794;Q7Z794	CON__Q7Z794;Q7Z794	9;9	5;5	3;3	Keratin, type II cytoskeletal 1b	KRT77	;	2	9	5	3	3	4	4	8	6	6	0	1	0	4	2	2	0	0	0	3	1	1	16.3	9.7	5.5	61.802	578	578;578	1	9	0	12.174	4.7	7.3	6.6	14.2	10.7	10.7	6852100	0	401350	0
D6R938;E9PBG7;E9PF82;Q13557;H0Y9J2;H7BXS4;E9PBE8;E7EQE4;E7ETC9;H0Y9C2;Q9UQM7	D6R938;E9PBG7;E9PF82;Q13557	5;5;5;5;2;2;1;1;1;1;1	5;5;5;5;2;2;1;1;1;1;1	3;3;3;3;2;0;0;0;0;0;0	Calcium/calmodulin-dependent protein kinase type II subunit delta	CAMK2D	;;;	11	5	5	3	1	0	0	2	2	4	1	0	0	2	2	4	0	0	0	1	1	3	18.1	18.1	8.2	56.298	498	498;512;533;499;182;362;168;173;180;194;478	1	9	0	14.699	3.8	0	0	8.6	8.6	14.3	4467000	1058100	0	0
E9PI90;Q9H061	E9PI90;Q9H061	2;2	2;2	2;2	Transmembrane protein 126A	TMEM126A	;	2	2	2	2	1	1	1	2	1	1	1	1	1	2	1	1	1	1	1	2	1	1	31.6	31.6	31.6	10.564	95	95;195	1	9	0	3.6293	21.1	21.1	21.1	31.6	21.1	21.1	1477900	222900	126730	112240
F1DAL9;P10589	F1DAL9;P10589	2;2	2;2	1;1	COUP transcription factor 1	NR2F1	;	2	2	2	1	1	1	1	1	2	1	1	1	1	1	2	1	0	0	0	0	1	0	5.5	5.5	2	43.898	398	398;423	1	9	0	4.2833	3.5	3.5	3.5	3.5	5.5	3.5	1916700	192610	138240	158640
F6VRR5;Q9BY77;Q8WUT1;F8WCX5	F6VRR5;Q9BY77	4;4;1;1	4;4;1;1	4;4;1;1	Polymerase delta-interacting protein 3	POLDIP3	;	4	4	4	4	0	0	0	4	3	2	0	0	0	4	3	2	0	0	0	4	3	2	12.1	12.1	12.1	48.103	438	438;421;229;281	1	9	0	14.267	0	0	0	12.1	10	7.1	7915800	0	0	0
F8VZY9;P05783;CON__H-INV:HIT000015463	F8VZY9;P05783	4;4;1	3;3;1	3;3;1	Keratin, type I cytoskeletal 18	KRT18	;	3	4	3	3	1	1	2	4	3	3	1	0	1	3	2	2	1	0	1	3	2	2	15.6	13.8	13.8	43.774	391	391;430;295	1	9	0	8.5381	5.9	1.8	7.7	15.6	12.3	12.3	2592000	105220	0	90901
G3V279;P84090	G3V279;P84090	2;2	2;2	2;2	Enhancer of rudimentary homolog	ERH	;	2	2	2	2	1	1	1	2	2	2	1	1	1	2	2	2	1	1	1	2	2	2	25.4	25.4	25.4	8.2033	71	71;104	1	9	0	7.7655	15.5	15.5	15.5	25.4	25.4	25.4	10187000	2047500	1324900	1485200
H0YL52;P09493;H0YNC7;H0YKP3;A0A087WTJ7;H0YKZ6	H0YL52;P09493;H0YNC7;H0YKP3	14;14;10;9;3;2	3;3;0;3;2;2	2;2;0;2;2;2	Tropomyosin alpha-1 chain	TPM1	;;;	6	14	3	2	14	12	14	0	0	1	3	3	3	0	0	0	2	2	2	0	0	0	43	10.2	4.9	30.38	265	265;284;223;157;106;70	1	9	0	20.332	43	38.1	43	0	0	3.8	20145000	9170200	5497000	5478200
K7ES02;Q13867;J3KS79;K7ENH5;K7ESE8;J3KSD8	K7ES02;Q13867;J3KS79;K7ENH5;K7ESE8;J3KSD8	2;2;1;1;1;1	2;2;1;1;1;1	2;2;1;1;1;1	Bleomycin hydrolase	BLMH	;;;;;	6	2	2	2	2	2	1	1	1	1	2	2	1	1	1	1	2	2	1	1	1	1	9.7	9.7	9.7	37.198	318	318;455;71;93;231;262	1	9	0	4.3749	9.7	9.7	3.5	6.3	6.3	6.3	4420100	1336400	1096600	766670
O95163;F5H2T0;H0YDF3	O95163;F5H2T0	6;5;2	6;5;2	6;5;2	Elongator complex protein 1	IKBKAP	;	3	6	6	6	0	0	0	2	3	4	0	0	0	2	3	4	0	0	0	2	3	4	7.4	7.4	7.4	150.25	1332	1332;983;346	1	9	0	8.508	0	0	0	3.3	2.4	4.1	3581800	0	0	0
P02452	P02452	3	3	3	Collagen alpha-1(I) chain	COL1A1		1	3	3	3	0	0	0	2	3	2	0	0	0	2	3	2	0	0	0	2	3	2	3.6	3.6	3.6	138.94	1464	1464	1	9	0	21.364	0	0	0	1.9	3.6	1.9	19183000	0	0	0
P05386	P05386	1	1	1	60S acidic ribosomal protein P1	RPLP1		1	1	1	1	1	1	1	1	1	1	1	1	1	1	1	1	1	1	1	1	1	1	14	14	14	11.514	114	114	1	6	0	4.155	14	14	14	14	14	14	5776000	1273100	782190	1032100
P06702	P06702	5	5	5	Protein S100-A9	S100A9		1	5	5	5	1	0	1	1	3	3	1	0	1	1	3	3	1	0	1	1	3	3	55.3	55.3	55.3	13.242	114	114	1	9	0	8.8239	13.2	0	13.2	6.1	30.7	30.7	5799500	969290	0	755190
P11166	P11166	2	2	2	Solute carrier family 2, facilitated glucose transporter member 1	SLC2A1		1	2	2	2	2	2	2	1	1	1	2	2	2	1	1	1	2	2	2	1	1	1	3.7	3.7	3.7	54.083	492	492	1	9	0	4.9862	3.7	3.7	3.7	1.6	1.6	1.6	3815600	1414700	905420	979410
P16278;E7EQ29;F8WF40;C9JF15;C9J539;C9JWX1;C9J4G9	P16278;E7EQ29	4;3;1;1;1;1;1	4;3;1;1;1;1;1	4;3;1;1;1;1;1	Beta-galactosidase	GLB1	;	7	4	4	4	0	0	0	4	3	2	0	0	0	4	3	2	0	0	0	4	3	2	6.4	6.4	6.4	76.074	677	677;546;84;102;114;147;185	1	9	0	6.2954	0	0	0	6.4	4.7	3.7	3197000	0	0	0
P51812;D6RHW7;D6R910;B1AXG1;B7Z3B5;F2Z2J1;Q15349;E9PMM7;B1AXG2;D6RA62;D6RE03;E9PAN7;E9PGT3;Q15418;Q9UK32	P51812	5;2;2;2;2;2;2;1;1;1;1;1;1;1;1	5;2;2;2;2;2;2;1;1;1;1;1;1;1;1	5;2;2;2;2;2;2;1;1;1;1;1;1;1;1	Ribosomal protein S6 kinase alpha-3	RPS6KA3		15	5	5	5	0	0	0	3	4	2	0	0	0	3	4	2	0	0	0	3	4	2	9.2	9.2	9.2	83.735	740	740;96;125;227;644;758;733;112;133;141;171;204;724;735;745	1	9	0	6.0042	0	0	0	5.5	7.7	4.1	1816000	0	0	0
P61221;H0Y990;D6RGF4;D6R9I9	P61221	3;1;1;1	3;1;1;1	3;1;1;1	ATP-binding cassette sub-family E member 1	ABCE1		4	3	3	3	2	0	1	1	3	1	2	0	1	1	3	1	2	0	1	1	3	1	10.2	10.2	10.2	67.314	599	599;147;210;421	1	8	0	5.65	7.7	0	2.5	2.5	10.2	2.5	988680	320990	0	48290
P62136;E9PMD7;F8W0V8;F8WE71;H0Y3Y6;F5H1L6;F5H037	P62136;E9PMD7	10;9;1;1;1;1;1	3;3;1;0;0;0;0	2;2;0;0;0;0;0	Serine/threonine-protein phosphatase PP1-alpha catalytic subunit;Serine/threonine-protein phosphatase	PPP1CA	;	7	10	3	2	7	4	6	6	5	4	0	0	2	3	2	2	0	0	2	2	2	2	34.5	12.7	6.1	37.512	330	330;253;54;64;82;169;179	1	9	0	5.594	21.8	12.7	18.8	25.5	18.8	15.5	3116500	0	0	923890
Q13428;J3KQ96;E7ETY2;H0YA99	Q13428;J3KQ96;E7ETY2	7;6;6;1	7;6;6;1	7;6;6;1	Treacle protein	TCOF1	;;	4	7	7	7	2	2	4	1	0	0	2	2	4	1	0	0	2	2	4	1	0	0	6.1	6.1	6.1	152.1	1488	1488;1414;1488;188	1	9	0	12.607	1.5	1.3	3.8	0.8	0	0	4706100	522710	1434600	1266100
Q58FF8	Q58FF8	6	1	1	Putative heat shock protein HSP 90-beta 2	HSP90AB2P		1	6	1	1	4	3	4	6	6	5	1	0	1	1	1	1	1	0	1	1	1	1	18.9	3.9	3.9	44.348	381	381	1	8	0	3.1887	11.8	7.9	11.8	18.9	18.9	14.4	8560500	1330200	0	1409100
Q5H907;Q5H909;Q9UNF1	Q5H907;Q5H909;Q9UNF1	5;5;5	5;5;5	5;5;5	Melanoma-associated antigen D2	MAGED2	;;	3	5	5	5	1	3	3	1	0	0	1	3	3	1	0	0	1	3	3	1	0	0	17.1	17.1	17.1	55.795	521	521;588;606	1	8	0	17.918	2.5	9.8	9.8	2.5	0	0	2635900	485600	818270	1112800
Q6P3X3;F8WCH1	Q6P3X3	5;1	5;1	5;1	Tetratricopeptide repeat protein 27	TTC27		2	5	5	5	4	1	2	1	1	0	4	1	2	1	1	0	4	1	2	1	1	0	9	9	9	96.631	843	843;41	1	9	0	5.3362	7.4	1.2	2.8	1.2	1.2	0	3167200	1255100	401630	505700
Q96IX5	Q96IX5	2	2	2	Up-regulated during skeletal muscle growth protein 5	USMG5		1	2	2	2	1	1	1	2	2	2	1	1	1	2	2	2	1	1	1	2	2	2	43.1	43.1	43.1	6.4575	58	58	1	9	0	18.471	25.9	25.9	25.9	43.1	43.1	43.1	35824000	6600700	4279300	4516600
Q96JB2	Q96JB2	3	3	3	Conserved oligomeric Golgi complex subunit 3	COG3		1	3	3	3	3	3	2	0	0	1	3	3	2	0	0	1	3	3	2	0	0	1	4.8	4.8	4.8	94.095	828	828	1	9	0	7.3219	4.8	4.8	3.4	0	0	1.6	27373000	9291600	5136400	7002600
Q9NV70	Q9NV70	6	6	6	Exocyst complex component 1	EXOC1		1	6	6	6	3	3	3	0	0	0	3	3	3	0	0	0	3	3	3	0	0	0	11.1	11.1	11.1	101.98	894	894	1	9	0	9.0171	6.9	5.6	5.1	0	0	0	5397700	1362900	2115800	1919100
Q9UL03;C9JVX2;G5E9X1;B3KQH5;C9JXP6;C9J885;C9K0V7;F8WAV7;Q5JSJ4	Q9UL03;C9JVX2;G5E9X1;B3KQH5	4;2;2;2;1;1;1;1;1	4;2;2;2;1;1;1;1;1	4;2;2;2;1;1;1;1;1	Integrator complex subunit 6	INTS6	;;;	9	4	4	4	2	1	2	1	2	1	2	1	2	1	2	1	2	1	2	1	2	1	7.3	7.3	7.3	100.39	887	887;131;571;709;89;126;130;151;861	1	9	0	4.2426	4.5	0.8	2.5	2	2.8	1.7	502450	175210	0	64765
Q9Y2Z0	Q9Y2Z0	6	6	6	Suppressor of G2 allele of SKP1 homolog	SUGT1		1	6	6	6	0	0	0	3	4	2	0	0	0	3	4	2	0	0	0	3	4	2	21.9	21.9	21.9	41.024	365	365	1	9	0	13.235	0	0	0	11.2	13.2	6	8209500	0	0	0
A0A087WTA8;P08123	A0A087WTA8;P08123	2;2	2;2	2;2	Collagen alpha-2(I) chain	COL1A2	;	2	2	2	2	1	1	1	1	2	2	1	1	1	1	2	2	1	1	1	1	2	2	1.4	1.4	1.4	129.15	1364	1364;1366	1	8	0	3.854	0.7	0.7	0.7	0.7	1.4	1.4	12520000	1995600	1153100	1099500
A6NLN1;A0A0U1RRM4;P26599;A0A0D9SF20;A0A087WUW5;K7ELW5;A0A087WU68;K7EKJ7;K7EK45	A6NLN1;A0A0U1RRM4;P26599;A0A0D9SF20	3;3;3;2;1;1;1;1;1	3;3;3;2;1;1;1;1;1	3;3;3;2;1;1;1;1;1	Polypyrimidine tract-binding protein 1	PTBP1	;;;	9	3	3	3	1	1	1	2	2	0	1	1	1	2	2	0	1	1	1	2	2	0	9.1	9.1	9.1	56.51	527	527;588;531;197;81;105;227;237;256	1	7	0	3.7169	4	4	4	7.4	5.1	0	637280	114500	76092	64843
B4DJ81;P28331	B4DJ81;P28331	6;6	6;6	6;6	NADH-ubiquinone oxidoreductase 75 kDa subunit, mitochondrial	NDUFS1	;	2	6	6	6	4	2	2	0	0	0	4	2	2	0	0	0	4	2	2	0	0	0	14.9	14.9	14.9	66.921	611	611;727	1	8	0	9.2787	11.1	3.1	3.9	0	0	0	5608600	4378600	520320	709620
CON__P02668	CON__P02668	2	2	2				1	2	2	2	2	2	1	1	1	1	2	2	1	1	1	1	2	2	1	1	1	1	16.6	16.6	16.6	18.974	169	169	1	8	0	3.1631	16.6	16.6	5.9	5.9	5.9	5.9	15287000	4279900	2827700	2018400
CON__Q05B55	CON__Q05B55	2	2	2				1	2	2	2	1	1	2	2	1	1	1	1	2	2	1	1	1	1	2	2	1	1	17.5	17.5	17.5	26.59	240	240	1	8	0	8.4601	7.9	7.9	17.5	17.5	7.9	7.9	11920000	1780400	1354600	2124600
E7ESC6;Q9UIA9	E7ESC6;Q9UIA9	3;3	3;3	3;3	Exportin-7	XPO7	;	2	3	3	3	1	3	2	0	1	1	1	3	2	0	1	1	1	3	2	0	1	1	3	3	3	124.07	1088	1088;1087	1	8	0	5.1728	1	3	2.2	0	1	1	1668400	499300	581810	265860
H7BXH2;E9PKF6;Q5H9R7;E9PQP7;E9PK08;E9PNN8;H0YEN2	H7BXH2;E9PKF6;Q5H9R7;E9PQP7	3;3;3;2;1;1;1	3;3;3;2;1;1;1	3;3;3;2;1;1;1	Serine/threonine-protein phosphatase 6 regulatory subunit 3	PPP6R3	;;;	7	3	3	3	2	1	1	1	1	2	2	1	1	1	1	2	2	1	1	1	1	2	5.4	5.4	5.4	92.407	827	827;838;873;641;140;186;580	1	8	0	4.6641	2.9	1.7	1.7	1.7	1.7	4.2	1569100	669140	219280	192480
F5H1D6;Q07864	F5H1D6;Q07864	5;5	5;5	5;5	DNA polymerase;DNA polymerase epsilon catalytic subunit A	POLE	;	2	5	5	5	4	2	2	0	0	0	4	2	2	0	0	0	4	2	2	0	0	0	3.9	3.9	3.9	258.35	2259	2259;2286	1	8	0	7.9155	3.5	1.8	1.7	0	0	0	936380	286670	433660	216050
F8WDV0;Q9UI26;H0Y8M5;D6RCN7;D6RJB1	F8WDV0;Q9UI26;H0Y8M5	3;3;2;1;1	3;3;2;1;1	3;3;2;1;1	Importin-11	IPO11	;;	5	3	3	3	2	2	3	0	1	0	2	2	3	0	1	0	2	2	3	0	1	0	7.2	7.2	7.2	99.707	863	863;975;160;148;162	1	8	0	6.5984	5	5	7.2	0	2.2	0	921590	276820	263300	287860
H0YLU7;P13804;H0YK49;H0YL12;H0YNX6;H0YKF0;H0YL83	H0YLU7;P13804;H0YK49;H0YL12;H0YNX6;H0YKF0	4;4;3;3;3;2;1	4;4;3;3;3;2;1	4;4;3;3;3;2;1	Electron transfer flavoprotein subunit alpha, mitochondrial	ETFA	;;;;;	7	4	4	4	3	2	1	0	1	0	3	2	1	0	1	0	3	2	1	0	1	0	24.8	24.8	24.8	31.739	303	303;333;229;239;254;289;73	1	7	0	7.3943	19.5	14.2	8.9	0	4.3	0	2624600	1567200	524770	297630
I3L0N3;P46459;I3L2G1;K7EQD6	I3L0N3;P46459	6;6;2;2	6;6;2;2	6;6;2;2	Vesicle-fusing ATPase	NSF	;	4	6	6	6	2	2	3	1	0	0	2	2	3	1	0	0	2	2	3	1	0	0	9.6	9.6	9.6	82.091	739	739;744;136;180	1	8	0	8.8062	3.2	3	4.3	2	0	0	2397100	575650	435970	1025100
I3L3U9;J3QSV6;O76021;I3L234;I3L3C4	I3L3U9;J3QSV6;O76021;I3L234;I3L3C4	2;2;2;1;1	2;2;2;1;1	2;2;2;1;1	Ribosomal L1 domain-containing protein 1	RSL1D1	;;;;	5	2	2	2	2	2	2	0	1	0	2	2	2	0	1	0	2	2	2	0	1	0	11.1	11.1	11.1	33.9	296	296;430;490;98;158	1	8	0	7.5068	11.1	11.1	11.1	0	6.8	0	1689600	635740	401110	576680
M0QXB4;O14579	M0QXB4;O14579	2;2	2;2	2;2	Coatomer subunit epsilon	COPE	;	2	2	2	2	2	0	2	1	1	1	2	0	2	1	1	1	2	0	2	1	1	1	20.8	20.8	20.8	36.923	331	331;308	1	7	0	3.0931	20.8	0	20.8	12.4	12.4	12.4	1519500	439770	0	427530
O60832;C9IYT0;H7BZF2;H7C2Q2;H7C0M1	O60832;C9IYT0	4;2;1;1;1	4;2;1;1;1	4;2;1;1;1	H/ACA ribonucleoprotein complex subunit 4	DKC1	;	5	4	4	4	3	3	2	0	0	0	3	3	2	0	0	0	3	3	2	0	0	0	11.9	11.9	11.9	57.673	514	514;258;76;207;229	1	8	0	10.79	8	8.4	6.4	0	0	0	5494900	1574700	2472000	1448200
O75533;H7C341	O75533	3;1	3;1	3;1	Splicing factor 3B subunit 1	SF3B1		2	3	3	3	1	2	1	2	2	0	1	2	1	2	2	0	1	2	1	2	2	0	3.5	3.5	3.5	145.83	1304	1304;241	1	8	0	15.288	1.2	2.3	1.2	2.5	2.5	0	1216300	162000	99277	64865
O95168;F2Z3P9;C9JXQ9	O95168;F2Z3P9;C9JXQ9	2;1;1	2;1;1	2;1;1	NADH dehydrogenase [ubiquinone] 1 beta subcomplex subunit 4	NDUFB4	;;	3	2	2	2	1	1	1	2	2	1	1	1	1	2	2	1	1	1	1	2	2	1	17.1	17.1	17.1	15.208	129	129;69;80	1	8	0	3.9541	7.8	7.8	7.8	17.1	17.1	7.8	9543600	1869500	0	995610
P49207	P49207	2	2	2	60S ribosomal protein L34	RPL34		1	2	2	2	2	1	1	2	1	1	2	1	1	2	1	1	2	1	1	2	1	1	14.5	14.5	14.5	13.293	117	117	1	8	0	3.5654	14.5	7.7	7.7	14.5	7.7	7.7	10162000	5420400	884360	956040
P56385	P56385	3	3	3	ATP synthase subunit e, mitochondrial	ATP5I		1	3	3	3	1	1	3	0	1	2	1	1	3	0	1	2	1	1	3	0	1	2	40.6	40.6	40.6	7.9331	69	69	1	8	0	4.7342	14.5	10.1	40.6	0	14.5	24.6	13177000	4525300	558910	3555900
Q00059;H7BYN3	Q00059;H7BYN3	3;2	3;2	3;2	Transcription factor A, mitochondrial	TFAM	;	2	3	3	3	3	3	2	0	0	0	3	3	2	0	0	0	3	3	2	0	0	0	13.4	13.4	13.4	29.096	246	246;219	1	8	0	8.835	13.4	13.4	8.9	0	0	0	8769400	4579800	2435200	1754300
Q14318;M0R2K9;U3KQI1;M0R1Q0;M0R1S6;M0R2Q6;A0A0A0MTJ1	Q14318;M0R2K9	3;2;1;1;1;1;1	3;2;1;1;1;1;1	3;2;1;1;1;1;1	Peptidyl-prolyl cis-trans isomerase FKBP8;Peptidyl-prolyl cis-trans isomerase	FKBP8	;	7	3	3	3	1	3	1	1	1	1	1	3	1	1	1	1	1	3	1	1	1	1	14.8	14.8	14.8	44.561	412	412;257;103;163;167;204;249	1	8	0	8.1264	7	14.8	7	7	7	7	1276500	184740	576560	120000
Q5T749	Q5T749	3	3	3	Keratinocyte proline-rich protein	KPRP		1	3	3	3	1	0	1	1	2	3	1	0	1	1	2	3	1	0	1	1	2	3	2.8	2.8	2.8	64.135	579	579	1	8	0	4.8003	1.6	0	1.6	1.2	2.6	2.8	7461300	793370	0	499170
Q6AI08;A0A087WXZ7;K7EIX2;K7ELR8	Q6AI08;A0A087WXZ7;K7EIX2	4;3;3;1	4;3;3;1	4;3;3;1	HEAT repeat-containing protein 6	HEATR6	;;	4	4	4	4	2	2	3	1	0	0	2	2	3	1	0	0	2	2	3	1	0	0	4.7	4.7	4.7	128.78	1181	1181;916;1069;413	1	8	0	5.7185	2.5	2.3	3.2	1	0	0	494170	125640	94354	208860
Q71RC2;F8W1I4;F8W1Z5;Q8TBL5;A0A087WTL9;F8VY40;Q96J85	Q71RC2;F8W1I4;F8W1Z5;Q8TBL5;A0A087WTL9;F8VY40;Q96J85	2;1;1;1;1;1;1	2;1;1;1;1;1;1	2;1;1;1;1;1;1	La-related protein 4	LARP4	;;;;;;	7	2	2	2	1	1	0	2	2	2	1	1	0	2	2	2	1	1	0	2	2	2	3.3	3.3	3.3	80.595	724	724;125;169;188;188;191;375	1	8	0	4.9901	1.5	1.5	0	3.3	3.3	3.3	1129000	16627	0	0
Q8TEX9;H0YN07;H0YMR4;H0YN14	Q8TEX9;H0YN07;H0YMR4;H0YN14	3;2;2;2	3;2;2;2	3;2;2;2	Importin-4	IPO4	;;;	4	3	3	3	1	1	2	1	2	1	1	1	2	1	2	1	1	1	2	1	2	1	3.4	3.4	3.4	118.71	1081	1081;312;547;911	1	8	0	5.0845	1	1	2	1	2.4	1	570980	99611	79815	144140
Q96SK2;C9J5K4;C9JYX1	Q96SK2	4;1;1	4;1;1	4;1;1	Transmembrane protein 209	TMEM209		3	4	4	4	1	0	1	2	3	1	1	0	1	2	3	1	1	0	1	2	3	1	12.8	12.8	12.8	62.921	561	561;56;189	1	8	0	5.0817	4.1	0	3.6	6.8	9.3	2.7	1950200	57837	0	1164300
Q9H2D1;E5RGK5;E5RFL3;E5RGT9	Q9H2D1;E5RGK5;E5RFL3;E5RGT9	2;1;1;1	2;1;1;1	2;1;1;1	Mitochondrial folate transporter/carrier	SLC25A32	;;;	4	2	2	2	1	1	1	2	2	0	1	1	1	2	2	0	1	1	1	2	2	0	15.2	15.2	15.2	35.407	315	315;123;123;149	1	7	0	4.9848	7.3	7.9	7.9	15.2	15.2	0	699380	121160	67027	90066
Q9NPL8;C9JU35;G3XA94;C9JR82;H7C5U1;F8WAU6;F8WB00;F8WC42	Q9NPL8;C9JU35;G3XA94	5;3;3;2;1;1;1;1	5;3;3;2;1;1;1;1	5;3;3;2;1;1;1;1	Complex I assembly factor TIMMDC1, mitochondrial	TIMMDC1	;;	8	5	5	5	1	1	3	0	1	2	1	1	3	0	1	2	1	1	3	0	1	2	27	27	27	32.177	285	285;151;175;150;38;65;71;90	1	8	0	11.632	3.2	3.2	14	0	7.7	8.4	2111100	320470	176310	715850
Q9P032	Q9P032	2	2	2	NADH dehydrogenase [ubiquinone] 1 alpha subcomplex assembly factor 4	NDUFAF4		1	2	2	2	1	2	1	1	2	1	1	2	1	1	2	1	1	2	1	1	2	1	13.7	13.7	13.7	20.266	175	175	1	8	0	4.2215	5.7	13.7	8	8	13.7	8	2577100	278140	579930	345910
Q9UDW1	Q9UDW1	2	2	2	Cytochrome b-c1 complex subunit 9	UQCR10		1	2	2	2	1	1	1	2	2	1	1	1	1	2	2	1	1	1	1	2	2	1	38.1	38.1	38.1	7.3084	63	63	1	8	0	3.5117	11.1	11.1	11.1	38.1	38.1	11.1	8351700	1081600	633120	764460
A0A087WTV6;Q96C36;J3KR12	A0A087WTV6;Q96C36;J3KR12	3;3;2	3;3;2	2;2;2	Pyrroline-5-carboxylate reductase 2	PYCR2	;;	3	3	3	2	0	0	0	3	2	2	0	0	0	3	2	2	0	0	0	2	1	1	15.9	15.9	11.8	25.868	246	246;320;359	1	7	0	7.187	0	0	0	15.9	11	11	5158600	0	0	0
A0A087WZN1;O43837;A0A087X2E5;A0A0D9SG66	A0A087WZN1;O43837;A0A087X2E5;A0A0D9SG66	4;4;3;2	4;4;3;2	4;4;3;2	Isocitrate dehydrogenase [NAD] subunit, mitochondrial;Isocitrate dehydrogenase [NAD] subunit beta, mitochondrial	IDH3B	;;;	4	4	4	4	0	2	2	1	1	0	0	2	2	1	1	0	0	2	2	1	1	0	12.9	12.9	12.9	42.41	387	387;385;376;145	1	6	0	10.142	0	8.5	6.5	2.3	2.3	0	1224200	0	225960	998200
A0A087X106;CON__O43790;CON__Q6NT21;CON__P78385;CON__Q14533;O43790;P78385;Q14533;CON__Q61726;CON__P78386;P78386;U3KPR1;F5GYI5;A6NCN2	A0A087X106;CON__O43790;CON__Q6NT21;CON__P78385;CON__Q14533;O43790;P78385;Q14533;CON__Q61726;CON__P78386;P78386;U3KPR1	4;4;4;4;4;4;4;4;3;3;3;2;1;1	3;3;3;3;3;3;3;3;2;2;2;1;1;1	3;3;3;3;3;3;3;3;2;2;2;1;1;1	Keratin, type II cuticular Hb6;Keratin, type II cuticular Hb3;Keratin, type II cuticular Hb1;Keratin, type II cuticular Hb5	KRT81;KRT86;KRT83;KRT85	;;;;;;;;;;;	14	4	3	3	1	0	0	3	3	4	0	0	0	2	2	3	0	0	0	2	2	3	6.6	5.2	5.2	53.116	484	484;486;493;493;505;486;493;505;479;507;507;143;295;255	1	7	0	3.4084	1.4	0	0	5.2	5.2	6.6	3603600	0	0	0
A8MX49;P49593;C9J2F3;B5MCT7	A8MX49;P49593;C9J2F3;B5MCT7	2;2;1;1	2;2;1;1	2;2;1;1	Protein phosphatase 1F	PPM1F	;;;	4	2	2	2	1	2	1	1	1	1	1	2	1	1	1	1	1	2	1	1	1	1	10.5	10.5	10.5	40.148	361	361;454;89;286	1	7	0	11.958	7.2	10.5	7.2	7.2	7.2	7.2	678410	136420	227760	79613
C9JA28;Q9UNL2	C9JA28;Q9UNL2	1;1	1;1	1;1	Translocon-associated protein subunit gamma	SSR3	;	2	1	1	1	1	1	1	1	1	1	1	1	1	1	1	1	1	1	1	1	1	1	8	8	8	20.161	174	174;185	1	6	0	6.8916	8	8	8	8	8	8	14637000	3666100	2723100	2785900
D6REM4;P48729;H0Y9X2;U3KQK7;E7ETM0;Q8N752	D6REM4;P48729;H0Y9X2;U3KQK7;E7ETM0;Q8N752	2;2;1;1;1;1	2;2;1;1;1;1	2;2;1;1;1;1	Casein kinase I isoform alpha;Casein kinase I isoform alpha-like	CSNK1A1;CSNK1A1L	;;;;;	6	2	2	2	1	1	1	2	1	1	1	1	1	2	1	1	1	1	1	2	1	1	11	11	11	27.741	236	236;337;167;184;264;337	1	7	0	3.2822	4.2	4.2	4.2	11	4.2	4.2	1302100	212240	171860	180110
F5H669;Q8N684;J3QT54;F5H6M0;F5H047	F5H669;Q8N684;J3QT54;F5H6M0;F5H047	2;2;1;1;1	2;2;1;1;1	2;2;1;1;1	Cleavage and polyadenylation specificity factor subunit 7	CPSF7	;;;;	5	2	2	2	1	1	1	1	1	2	1	1	1	1	1	2	1	1	1	1	1	2	8.8	8.8	8.8	41.265	374	374;471;204;219;288	1	7	0	3.5788	6.7	6.7	6.7	6.7	6.7	8.8	431680	45472	31677	28804
F8WCF6;P59998;R4GN08;F8WDD7;H7C0A3;A0A0A6YYG9;F8WDW3;F8WE39	F8WCF6;P59998;R4GN08;F8WDD7;H7C0A3;A0A0A6YYG9	4;4;3;2;2;2;1;1	4;4;3;2;2;2;1;1	4;4;3;2;2;2;1;1	Actin-related protein 2/3 complex subunit 4	ARPC4-TTLL3;ARPC4	;;;;;	8	4	4	4	4	0	3	0	0	0	4	0	3	0	0	0	4	0	3	0	0	0	26.5	26.5	26.5	21.058	181	181;168;77;113;167;625;44;47	1	7	0	5.5261	26.5	0	19.9	0	0	0	4686300	2705300	0	1980900
H0Y2S1;O43824	H0Y2S1;O43824	3;3	3;3	3;3	Putative GTP-binding protein 6	GTPBP6	;	2	3	3	3	0	0	0	3	2	2	0	0	0	3	2	2	0	0	0	3	2	2	6.2	6.2	6.2	56.897	516	516;516	1	7	0	5.4426	0	0	0	6.2	4.1	4.1	4335700	0	0	0
H0Y711;Q9BQA1	H0Y711;Q9BQA1	2;2	2;2	2;2	Methylosome protein 50	WDR77	;	2	2	2	2	1	1	1	1	1	2	1	1	1	1	1	2	1	1	1	1	1	2	10.7	10.7	10.7	30.987	291	291;342	1	7	0	2.4171	2.4	2.4	2.4	2.4	2.4	10.7	3933100	572270	341880	452560
H0Y8P4;Q8TED0	H0Y8P4;Q8TED0	4;3	4;3	4;3	U3 small nucleolar RNA-associated protein 15 homolog	UTP15	;	2	4	4	4	0	1	0	2	3	2	0	1	0	2	3	2	0	1	0	2	3	2	9.4	9.4	9.4	61.32	545	545;518	1	8	0	7.5231	0	1.8	0	5	6.8	4.4	2661300	0	207560	0
H3BPS8;H3BQN4;J3KPS3;P04075;H3BUH7;H3BR04;H3BMQ8;H3BU78	H3BPS8;H3BQN4;J3KPS3;P04075;H3BUH7;H3BR04	3;3;3;3;2;2;1;1	3;3;3;3;2;2;1;1	3;3;3;3;2;2;1;1	Fructose-bisphosphate aldolase;Fructose-bisphosphate aldolase A	ALDOA	;;;;;	8	3	3	3	1	0	2	1	1	2	1	0	2	1	1	2	1	0	2	1	1	2	17.3	17.3	17.3	30.426	278	278;361;368;364;155;162;140;204	1	7	0	6.3176	5	0	10.1	5	5	12.2	5045000	1176900	0	1301000
H7C155;P04049	H7C155;P04049	6;6	3;3	3;3	RAF proto-oncogene serine/threonine-protein kinase	RAF1	;	2	6	3	3	1	1	1	4	3	3	1	1	1	1	2	1	1	1	1	1	2	1	21.1	16.3	16.3	59.741	527	527;648	1	7	0	2.4119	3.6	3.6	3.6	11.4	12.7	10.4	43441000	107040	56563	77809
O75190;E9PH18;C9JRD2;C9J2C4;C9JXB9;A0A0J9YX62;Q8NHS0;P25686	O75190;E9PH18;C9JRD2;C9J2C4;C9JXB9;A0A0J9YX62;Q8NHS0;P25686	2;1;1;1;1;1;1;1	2;1;1;1;1;1;1;1	2;1;1;1;1;1;1;1	DnaJ homolog subfamily B member 6;DnaJ homolog subfamily B member 8;DnaJ homolog subfamily B member 2	DNAJB6;DNAJB2;DNAJB8	;;;;;;;	8	2	2	2	1	1	1	1	1	2	1	1	1	1	1	2	1	1	1	1	1	2	7.7	7.7	7.7	36.087	326	326;211;228;228;244;334;232;324	1	7	0	4.2122	4.6	4.6	4.6	3.1	4.6	7.7	5783800	1016700	783840	703580
O75531	O75531	3	3	3	Barrier-to-autointegration factor;Barrier-to-autointegration factor, N-terminally processed	BANF1		1	3	3	3	2	2	3	0	0	0	2	2	3	0	0	0	2	2	3	0	0	0	48.3	48.3	48.3	10.058	89	89	1	7	0	6.3101	21.3	21.3	48.3	0	0	0	2253900	783900	420380	1049600
O95394;A0A087WT27;J3KN95;H0Y8I3;H0Y987;D6RCD1;D6RC77;D6RCQ8;D6RF77	O95394;A0A087WT27;J3KN95;H0Y8I3;H0Y987	4;3;3;2;2;1;1;1;1	4;3;3;2;2;1;1;1;1	4;3;3;2;2;1;1;1;1	Phosphoacetylglucosamine mutase	PGM3	;;;;	9	4	4	4	0	3	3	1	0	0	0	3	3	1	0	0	0	3	3	1	0	0	8.9	8.9	8.9	59.851	542	542;441;461;113;197;71;114;146;156	1	7	0	7.1403	0	5.7	7.4	1.8	0	0	3044000	0	1355200	1586800
P05387;H0YDD8	P05387	3;1	3;1	3;1	60S acidic ribosomal protein P2	RPLP2		2	3	3	3	1	2	2	1	0	1	1	2	2	1	0	1	1	2	2	1	0	1	40.9	40.9	40.9	11.665	115	115;92	1	7	0	6.7427	10.4	24.3	27	10.4	0	10.4	7010200	1551400	2659200	1663200
P21953	P21953	1	1	1	2-oxoisovalerate dehydrogenase subunit beta, mitochondrial	BCKDHB		1	1	1	1	1	1	1	1	1	1	1	1	1	1	1	1	1	1	1	1	1	1	4.3	4.3	4.3	43.122	392	392	1	7	0.0040282	1.9385	4.3	4.3	4.3	4.3	4.3	4.3	317290	51417	41406	36151
P27348;E9PG15;Q04917;P31946;P61981;P31947	P27348;E9PG15	4;2;1;1;1;1	3;2;0;0;0;0	3;2;0;0;0;0	14-3-3 protein theta	YWHAQ	;	6	4	3	3	2	2	2	2	4	2	1	1	1	1	3	1	1	1	1	1	3	1	29.8	29.8	29.8	27.764	245	245;149;246;246;247;248	1	8	0	12.139	9.8	9.8	9.8	9.8	29.8	9.8	2708700	895410	472300	399750
P31949	P31949	1	1	1	Protein S100-A11;Protein S100-A11, N-terminally processed	S100A11		1	1	1	1	1	1	1	1	1	1	1	1	1	1	1	1	1	1	1	1	1	1	15.2	15.2	15.2	11.74	105	105	1	6	0	10.602	15.2	15.2	15.2	15.2	15.2	15.2	872720	214600	102660	140700
P38159;H3BR27;H0Y6E7;H3BT71;H3BNC1;H3BUY5;Q96E39;O75526	P38159;H3BR27;H0Y6E7;H3BT71	3;2;2;2;1;1;1;1	3;2;2;2;1;1;1;1	3;2;2;2;1;1;1;1	RNA-binding motif protein, X chromosome;RNA-binding motif protein, X chromosome, N-terminally processed	RBMX	;;;	8	3	3	3	2	3	1	0	0	1	2	3	1	0	0	1	2	3	1	0	0	1	6.6	6.6	6.6	42.331	391	391;78;292;296;37;263;390;392	1	7	0	4.5594	4.1	6.6	2	0	0	2	2208900	1075900	416760	522670
P43686	P43686	3	3	3	26S protease regulatory subunit 6B	PSMC4		1	3	3	3	1	1	2	0	1	0	1	1	2	0	1	0	1	1	2	0	1	0	11	11	11	47.366	418	418	1	7	0	18.037	4.3	4.3	6.5	0	4.5	0	975880	216590	142920	616380
P62258;K7EM20	P62258;K7EM20	4;3	3;2	3;2	14-3-3 protein epsilon	YWHAE	;	2	4	3	3	3	2	3	2	1	2	2	1	2	1	0	1	2	1	2	1	0	1	16.1	16.1	16.1	29.174	255	255;115	1	7	0	3.6664	16.1	8.6	16.1	11.4	3.9	8.6	2472100	1101600	397560	600080
P62857	P62857	2	2	2	40S ribosomal protein S28	RPS28		1	2	2	2	1	1	1	1	2	1	1	1	1	1	2	1	1	1	1	1	2	1	30.4	30.4	30.4	7.8409	69	69	1	7	0	4.9479	17.4	17.4	17.4	17.4	30.4	17.4	9276500	1380800	1064000	1465200
Q01469;I6L8B7	Q01469;I6L8B7	2;1	2;1	2;1	Fatty acid-binding protein, epidermal	FABP5	;	2	2	2	2	1	2	1	1	1	1	1	2	1	1	1	1	1	2	1	1	1	1	13.3	13.3	13.3	15.164	135	135;101	1	7	0	4.1226	6.7	13.3	6.7	6.7	6.7	6.7	2295200	671420	649800	372450
Q15477;H7C5N0;H7C4L3;B4E0B4	Q15477	5;1;1;1	5;1;1;1	5;1;1;1	Helicase SKI2W	SKIV2L		4	5	5	5	2	1	2	1	1	0	2	1	2	1	1	0	2	1	2	1	1	0	6.5	6.5	6.5	137.75	1246	1246;156;182;230	1	7	0	9.5184	2.7	1.4	2.4	1.3	0.9	0	649480	280940	198840	148260
Q6ZMG9	Q6ZMG9	1	1	1	Ceramide synthase 6	CERS6		1	1	1	1	1	1	1	1	1	1	1	1	1	1	1	1	1	1	1	1	1	1	2.9	2.9	2.9	44.889	384	384	1	6	0	2.5476	2.9	2.9	2.9	2.9	2.9	2.9	239520	67015	46847	47569
Q7Z4Q2	Q7Z4Q2	3	3	3	HEAT repeat-containing protein 3	HEATR3		1	3	3	3	0	0	1	2	2	2	0	0	1	2	2	2	0	0	1	2	2	2	7.2	7.2	7.2	74.582	680	680	1	7	0	3.5441	0	0	1.6	4.9	4.9	4	728320	0	0	166660
Q7Z7H8	Q7Z7H8	3	3	3	39S ribosomal protein L10, mitochondrial	MRPL10		1	3	3	3	2	1	2	1	0	1	2	1	2	1	0	1	2	1	2	1	0	1	19.2	19.2	19.2	29.282	261	261	1	7	0	7.3279	11.9	8	15.3	8	0	8	4323600	954910	771540	829440
Q92522	Q92522	4	4	4	Histone H1x	H1FX		1	4	4	4	1	2	4	0	0	0	1	2	4	0	0	0	1	2	4	0	0	0	17.8	17.8	17.8	22.487	213	213	1	7	0	7.8577	4.7	10.3	17.8	0	0	0	3503400	925040	1606100	972230
Q96BN8;H0Y8S4	Q96BN8	3;1	3;1	3;1	Ubiquitin thioesterase otulin	OTULIN		2	3	3	3	0	0	0	1	3	3	0	0	0	1	3	3	0	0	0	1	3	3	13.1	13.1	13.1	40.262	352	352;66	1	7	0	4.9438	0	0	0	3.4	13.1	13.1	844580	0	0	0
Q96KP1	Q96KP1	3	3	3	Exocyst complex component 2	EXOC2		1	3	3	3	3	1	3	0	0	0	3	1	3	0	0	0	3	1	3	0	0	0	4.4	4.4	4.4	104.07	924	924	1	7	0	4.2705	4.4	1.2	4.4	0	0	0	3052100	1558700	291780	1201700
Q9NRX1;F8WBJ6	Q9NRX1;F8WBJ6	3;2	3;2	3;2	RNA-binding protein PNO1	PNO1	;	2	3	3	3	1	1	2	2	1	0	1	1	2	2	1	0	1	1	2	2	1	0	19	19	19	27.924	252	252;136	1	7	0	4.669	7.1	5.6	11.9	11.9	5.6	0	2072100	203750	153560	505830
Q9NVP1;H7C452	Q9NVP1;H7C452	2;1	2;1	2;1	ATP-dependent RNA helicase DDX18	DDX18	;	2	2	2	2	2	1	1	1	1	1	2	1	1	1	1	1	2	1	1	1	1	1	4.5	4.5	4.5	75.406	670	670;214	1	7	0	2.4418	4.5	2.1	2.1	2.1	2.1	2.1	455780	286720	39977	39550
Q9UMS4;H0YGZ5;F5GY56	Q9UMS4;H0YGZ5;F5GY56	2;1;1	2;1;1	2;1;1	Pre-mRNA-processing factor 19	PRPF19	;;	3	2	2	2	1	2	1	1	1	1	1	2	1	1	1	1	1	2	1	1	1	1	5.2	5.2	5.2	55.18	504	504;119;252	1	7	0.0058766	1.8278	3.4	5.2	3.4	1.8	3.4	3.4	4997200	873320	1690300	588750
Q9Y230;M0QXI6;X6R2L4;M0R0Y3	Q9Y230;M0QXI6;X6R2L4;M0R0Y3	3;2;2;2	3;2;2;2	3;2;2;2	RuvB-like 2	RUVBL2	;;;	4	3	3	3	2	2	1	1	0	1	2	2	1	1	0	1	2	2	1	1	0	1	6.9	6.9	6.9	51.156	463	463;109;259;354	1	7	0	4.5075	4.8	4.8	2.2	2.6	0	2.6	3166300	1323700	670800	236510
Q9Y265;E7ETR0;J3QLR1;H7C4G5	Q9Y265;E7ETR0	5;4;1;1	5;4;1;1	5;4;1;1	RuvB-like 1	RUVBL1	;	4	5	5	5	2	2	1	0	1	1	2	2	1	0	1	1	2	2	1	0	1	1	14.9	14.9	14.9	50.227	456	456;315;131;267	1	7	0	11.813	5.5	6.8	2.4	0	2.9	3.1	3115800	1566400	277960	504380
Q9Y2H2	Q9Y2H2	2	2	2	Phosphatidylinositide phosphatase SAC2	INPP5F		1	2	2	2	1	2	1	1	1	1	1	2	1	1	1	1	1	2	1	1	1	1	2	2	2	128.41	1132	1132	1	7	0	3.3634	1.3	2	1.3	1.3	1.3	1.3	949740	153750	463580	98350
Q9Y3A6;B1AKT3	Q9Y3A6;B1AKT3	3;2	3;2	3;2	Transmembrane emp24 domain-containing protein 5	TMED5	;	2	3	3	3	1	3	1	0	1	0	1	3	1	0	1	0	1	3	1	0	1	0	20.1	20.1	20.1	26.005	229	229;162	1	7	0	38.262	5.2	20.1	5.2	0	10	0	4348900	1248200	1974600	910580
A0A0G2JMB2;A0A075B6N7;P01877;P01876	A0A0G2JMB2;A0A075B6N7;P01877;P01876	1;1;1;1	1;1;1;1	1;1;1;1	Ig alpha-2 chain C region;Ig alpha-1 chain C region	IGHA2;IGHA1	;;;	4	1	1	1	1	1	1	1	1	1	1	1	1	1	1	1	1	1	1	1	1	1	2.9	2.9	2.9	36.508	340	340;340;340;353	1	6	0	2.5221	2.9	2.9	2.9	2.9	2.9	2.9	6615000	2174800	1509700	936660
A0A075B6T1;Q9C0C7;H0YE34	A0A075B6T1;Q9C0C7;H0YE34	2;2;1	2;2;1	2;2;1	Activating molecule in BECN1-regulated autophagy protein 1	AMBRA1	;;	3	2	2	2	2	1	1	1	1	0	2	1	1	1	1	0	2	1	1	1	1	0	3.2	3.2	3.2	129.6	1179	1179;1298;256	1	6	0.0010549	2.1561	3.2	1.9	1.4	1.9	1.9	0	890910	374160	118080	165190
A0A087WVV1;P49721	A0A087WVV1;P49721	1;1	1;1	1;1	Proteasome subunit beta type-2	PSMB2	;	2	1	1	1	1	1	1	1	1	1	1	1	1	1	1	1	1	1	1	1	1	1	13.1	13.1	13.1	9.557	84	84;201	1	6	0	2.5939	13.1	13.1	13.1	13.1	13.1	13.1	1124600	254330	149240	169430
A0A0A0MTH9;O14981	A0A0A0MTH9;O14981	4;4	4;4	4;4	TATA-binding protein-associated factor 172	BTAF1	;	2	4	4	4	3	2	1	0	0	0	3	2	1	0	0	0	3	2	1	0	0	0	3.8	3.8	3.8	206.93	1849	1849;1849	1	6	0	5.923	3.1	1.8	1.1	0	0	0	738630	376540	313710	48368
H0YC73;H0YBW1;E5RH50;A0A0B4J210;Q6PKG0	H0YC73;H0YBW1;E5RH50;A0A0B4J210;Q6PKG0	2;2;2;2;2	2;2;2;2;2	2;2;2;2;2	La-related protein 1	LARP1	;;;;	5	2	2	2	1	2	2	0	0	0	1	2	2	0	0	0	1	2	2	0	0	0	16.9	16.9	16.9	22.747	195	195;281;610;815;1096	1	5	0	3.8033	8.2	16.9	16.9	0	0	0	195820	43896	76593	75332
A0A0C4DGP2;A0A0C4DGP5;Q86Y91	A0A0C4DGP2;A0A0C4DGP5;Q86Y91	2;2;2	2;2;2	2;2;2	Kinesin-like protein;Kinesin-like protein KIF18B	KIF18B	;;	3	2	2	2	1	1	0	1	2	1	1	1	0	1	2	1	1	1	0	1	2	1	5.5	5.5	5.5	91.054	833	833;852;864	1	6	0	5.865	1.9	1.9	0	1.9	5.5	1.9	378200	35848	26688	0
A0A0D9SF60;Q99569;B4DRK2;E9PHB5;E7EPC8;Q9UQB3	A0A0D9SF60;Q99569;B4DRK2;E9PHB5;E7EPC8;Q9UQB3	2;2;1;1;1;1	2;2;1;1;1;1	2;2;1;1;1;1	Plakophilin-4;Catenin delta-2	PKP4;CTNND2	;;;;;	6	2	2	2	0	0	0	1	1	2	0	0	0	1	1	2	0	0	0	1	1	2	1.9	1.9	1.9	133.97	1208	1208;1192;888;912;1134;1225	1	4	0	5.0679	0	0	0	0.8	0.8	1.9	396780	0	0	0
A6NHL2	A6NHL2	4	1	1	Tubulin alpha chain-like 3	TUBAL3		1	4	1	1	3	4	4	3	3	4	1	1	1	1	1	1	1	1	1	1	1	1	8.3	3.8	3.8	49.908	446	446	1	6	0	2.6885	6.3	8.3	8.3	6.3	6.3	8.3	8340400	1405800	800950	1166200
B1AKQ8;C9JZN1;F6X3N5;F6UT28;C9JIS1;C9JXA5;E7EP32;Q9HAV0;P62879;P62873;C9JD14;F5H8J8;F5H100;F5H0S8;E9PCP0;P16520	B1AKQ8;C9JZN1;F6X3N5;F6UT28;C9JIS1;C9JXA5;E7EP32;Q9HAV0;P62879;P62873;C9JD14;F5H8J8;F5H100;F5H0S8;E9PCP0;P16520	2;2;2;2;2;2;2;2;2;2;1;1;1;1;1;1	2;2;2;2;2;2;2;2;2;2;1;1;1;1;1;1	2;2;2;2;2;2;2;2;2;2;1;1;1;1;1;1	Guanine nucleotide-binding protein subunit beta-4;Guanine nucleotide-binding protein G(I)/G(S)/G(T) subunit beta-2;Guanine nucleotide-binding protein G(I)/G(S)/G(T) subunit beta-1;Guanine nucleotide-binding protein G(I)/G(S)/G(T) subunit beta-3	GNB1;GNB2;GNB4;GNB3	;;;;;;;;;;;;;;;	16	2	2	2	1	0	2	1	1	1	1	0	2	1	1	1	1	0	2	1	1	1	19.6	19.6	19.6	12.198	107	107;152;163;165;232;251;296;340;340;340;79;232;232;264;339;340	1	6	0	3.4173	9.3	0	19.6	9.3	9.3	9.3	3820500	829590	0	1450400
B3KQV6;P30153;H0YDG7;P30154	B3KQV6;P30153;H0YDG7;P30154	2;2;1;1	2;2;1;1	2;2;1;1	Serine/threonine-protein phosphatase 2A 65 kDa regulatory subunit A alpha isoform;Serine/threonine-protein phosphatase 2A 65 kDa regulatory subunit A beta isoform	PPP2R1A;PPP2R1B	;;;	4	2	2	2	2	1	1	1	1	0	2	1	1	1	1	0	2	1	1	1	1	0	8.3	8.3	8.3	45.604	410	410;589;224;601	1	6	0	4.0262	8.3	3.9	4.4	4.4	4.4	0	411380	159990	60586	76086
B3KY94;O14735	B3KY94;O14735	2;2	2;2	2;2	CDP-diacylglycerol--inositol 3-phosphatidyltransferase	CDIPT	;	2	2	2	2	0	0	0	1	2	2	0	0	0	1	2	2	0	0	0	1	2	2	11	11	11	25.946	237	237;213	1	6	0	3.3327	0	0	0	5.5	11	11	910160	0	0	0
G5E9F5;B5MC53;B5MCF8;P39210	G5E9F5;B5MC53;B5MCF8;P39210	1;1;1;1	1;1;1;1	1;1;1;1	Protein Mpv17	MPV17	;;;	4	1	1	1	1	1	1	1	1	1	1	1	1	1	1	1	1	1	1	1	1	1	20.4	20.4	20.4	12.958	113	113;170;171;176	1	6	0	9.1546	20.4	20.4	20.4	20.4	20.4	20.4	1354000	322400	215760	273730
H7BZ50;H7C173;H7C202;B8ZZ87;Q6P582;Q6NZ67	H7BZ50;H7C173;H7C202;B8ZZ87;Q6P582;Q6NZ67	1;1;1;1;1;1	1;1;1;1;1;1	1;1;1;1;1;1	Mitotic-spindle organizing protein 2A;Mitotic-spindle organizing protein 2B	MZT2B;MZT2A	;;;;;	6	1	1	1	1	1	1	1	1	1	1	1	1	1	1	1	1	1	1	1	1	1	10.7	10.7	10.7	12.386	121	121;122;140;218;158;158	1	6	0	3.2766	10.7	10.7	10.7	10.7	10.7	10.7	1097100	224500	201110	177690
C9JLF4;Q9NVH0	C9JLF4;Q9NVH0	2;2	2;2	2;2	Exonuclease 3-5 domain-containing protein 2	EXD2	;	2	2	2	2	0	1	1	1	2	1	0	1	1	1	2	1	0	1	1	1	2	1	22.8	22.8	22.8	12.421	114	114;621	1	6	0	14.875	0	11.4	11.4	11.4	22.8	11.4	903100	0	85137	81402
F8WBS5;F8WB72;C9K025;P18077	F8WBS5;F8WB72;C9K025;P18077	1;1;1;1	1;1;1;1	1;1;1;1	60S ribosomal protein L35a	RPL35A	;;;	4	1	1	1	1	1	1	1	1	1	1	1	1	1	1	1	1	1	1	1	1	1	16.4	16.4	16.4	6.4725	55	55;57;94;110	1	6	0	2.8307	16.4	16.4	16.4	16.4	16.4	16.4	12463000	3489800	2366800	2270100
CON__ENSEMBL:ENSBTAP00000033053	CON__ENSEMBL:ENSBTAP00000033053	1	1	1				1	1	1	1	1	1	1	1	1	1	1	1	1	1	1	1	1	1	1	1	1	1	15.1	15.1	15.1	14.759	139	139	1	6	0	27.808	15.1	15.1	15.1	15.1	15.1	15.1	7765800	1189100	878540	1427600
CON__Q3SZH5	CON__Q3SZH5	2	2	2				1	2	2	2	2	1	0	2	1	0	2	1	0	2	1	0	2	1	0	2	1	0	8.3	8.3	8.3	45.456	424	424	1	6	0	2.7785	8.3	4.2	0	8.3	4	0	370080	164960	43420	0
CON__Q9C075;Q9C075;J3QR55;K7EQH6;G3V1C2;CON__Q6IFU5;Q6A162	CON__Q9C075;Q9C075;J3QR55	3;3;2;1;1;1;1	1;1;0;0;0;0;0	1;1;0;0;0;0;0	Keratin, type I cytoskeletal 23	KRT23	;;	7	3	1	1	3	2	3	2	2	2	1	1	1	1	1	1	1	1	1	1	1	1	8.3	4.5	4.5	48.131	422	422;422;149;162;236;431;431	1	6	0.003096	2.0452	8.3	6.6	8.3	6.6	6.6	6.6	1250800	295870	205210	152450
E7EPM6;P33121;D6RER0;B7Z3Z9;H0Y9Z9;D6RG07;H0Y9U7	E7EPM6;P33121;D6RER0;B7Z3Z9	3;3;2;2;1;1;1	3;3;2;2;1;1;1	3;3;2;2;1;1;1	Long-chain-fatty-acid--CoA ligase 1	ACSL1	;;;	7	3	3	3	2	0	3	1	0	0	2	0	3	1	0	0	2	0	3	1	0	0	4.7	4.7	4.7	74.281	664	664;698;388;527;94;126;294	1	6	0	2.8835	3	0	4.7	1.8	0	0	2429700	965320	0	1059600
E9PR30;P62861	E9PR30;P62861	1;1	1;1	1;1	40S ribosomal protein S30	FAU	;	2	1	1	1	1	1	1	1	1	1	1	1	1	1	1	1	1	1	1	1	1	1	10.2	10.2	10.2	10.905	98	98;59	1	6	0.003988	1.8998	10.2	10.2	10.2	10.2	10.2	10.2	69549000	21071000	12010000	13913000
F8VXI1;F8VRD8;Q9UI09	F8VXI1;F8VRD8;Q9UI09	1;1;1	1;1;1	1;1;1	NADH dehydrogenase [ubiquinone] 1 alpha subcomplex subunit 12	NDUFA12	;;	3	1	1	1	1	1	1	1	1	1	1	1	1	1	1	1	1	1	1	1	1	1	14.5	14.5	14.5	6.2241	55	55;99;145	1	6	0.0085878	1.7023	14.5	14.5	14.5	14.5	14.5	14.5	1035000	326930	214410	190810
G3V126;Q9UI12	G3V126;Q9UI12	4;4	4;4	4;4	V-type proton ATPase subunit H	ATP6V1H	;	2	4	4	4	2	2	2	0	0	0	2	2	2	0	0	0	2	2	2	0	0	0	12.9	12.9	12.9	51.57	443	443;483	1	6	0	4.8109	7.2	6.8	5.6	0	0	0	1266500	885370	214640	166530
H7C0V0;Q8WWC4	H7C0V0;Q8WWC4	2;2	2;2	2;2	Uncharacterized protein C2orf47, mitochondrial	C2orf47	;	2	2	2	2	1	1	2	1	0	1	1	1	2	1	0	1	1	1	2	1	0	1	10.7	10.7	10.7	25.006	225	225;291	1	6	0	5.5012	6.2	4.4	10.7	6.2	0	6.2	1000600	199610	86974	205530
J3KMZ7;Q9H0H0	J3KMZ7;Q9H0H0	2;2	2;2	2;2	Integrator complex subunit 2	INTS2	;	2	2	2	2	1	1	1	2	0	1	1	1	1	2	0	1	1	1	1	2	0	1	3.3	3.3	3.3	133.38	1196	1196;1204	1	6	0	3.2074	1	1	1	3.3	0	1	458210	103450	69600	80677
J3QLI9;P62314	J3QLI9;P62314	1;1	1;1	1;1	Small nuclear ribonucleoprotein Sm D1	SNRPD1	;	2	1	1	1	1	1	0	1	0	0	1	1	0	1	0	0	1	1	0	1	0	0	26.7	26.7	26.7	8.3926	75	75;119	1	5	0	2.3549	26.7	26.7	0	26.7	0	0	516400	272310	209500	0
J9JIC5;Q9HAS0	J9JIC5;Q9HAS0	1;1	1;1	1;1	Protein Njmu-R1	C17orf75	;	2	1	1	1	1	1	1	1	1	1	1	1	1	1	1	1	1	1	1	1	1	1	2.8	2.8	2.8	44.609	396	396;396	1	6	0.0040201	1.9272	2.8	2.8	2.8	2.8	2.8	2.8	135980	0	28334	34810
M0R2S2;M0R165;Q9UBC2	M0R2S2;M0R165;Q9UBC2	1;1;1	1;1;1	1;1;1	Epidermal growth factor receptor substrate 15-like 1	EPS15L1	;;	3	1	1	1	0	0	0	1	1	1	0	0	0	1	1	1	0	0	0	1	1	1	2.5	2.5	2.5	49.856	447	447;756;864	1	3	0	2.5354	0	0	0	2.5	2.5	2.5	28674000	0	0	0
O00311	O00311	2	2	2	Cell division cycle 7-related protein kinase	CDC7		1	2	2	2	0	2	0	2	0	2	0	2	0	2	0	2	0	2	0	2	0	2	4	4	4	63.887	574	574	1	6	0	3.7603	0	4	0	4	0	4	1017600	0	168350	0
O00443;E9PPP3;A0A0C4DGF9	O00443;E9PPP3;A0A0C4DGF9	2;1;1	2;1;1	2;1;1	Phosphatidylinositol 4-phosphate 3-kinase C2 domain-containing subunit alpha	PIK3C2A	;;	3	2	2	2	2	1	1	1	1	0	2	1	1	1	1	0	2	1	1	1	1	0	1.5	1.5	1.5	190.68	1686	1686;130;483	1	6	0.0031315	2.0772	1.5	0.5	0.5	0.5	0.5	0	1147000	860220	63545	49624
O00483	O00483	2	2	2	Cytochrome c oxidase subunit NDUFA4	NDUFA4		1	2	2	2	1	1	0	2	1	1	1	1	0	2	1	1	1	1	0	2	1	1	22.2	22.2	22.2	9.3697	81	81	1	6	0	2.8796	9.9	12.3	0	22.2	12.3	12.3	13136000	1936000	0	0
O15144;H7C3F9	O15144	4;1	4;1	4;1	Actin-related protein 2/3 complex subunit 2	ARPC2		2	4	4	4	2	2	2	0	0	0	2	2	2	0	0	0	2	2	2	0	0	0	23	23	23	34.333	300	300;165	1	6	0	5.6163	11.3	16	9	0	0	0	2146600	1114600	278100	753810
O75556	O75556	2	2	2	Mammaglobin-B	SCGB2A1		1	2	2	2	2	2	2	0	0	0	2	2	2	0	0	0	2	2	2	0	0	0	21.1	21.1	21.1	10.884	95	95	1	6	0	3.8722	21.1	21.1	21.1	0	0	0	5712100	3067700	689540	1954800
O75616;K7EQJ8	O75616;K7EQJ8	2;1	2;1	2;1	GTPase Era, mitochondrial	ERAL1	;	2	2	2	2	1	1	0	1	1	2	1	1	0	1	1	2	1	1	0	1	1	2	7.8	7.8	7.8	48.349	437	437;80	1	6	0	2.4214	4.1	4.1	0	4.1	4.1	7.8	735280	29490	34426	0
X6RKY7;X6RF82;X6RA30;O75794	X6RKY7;X6RF82;X6RA30;O75794	1;1;1;1	1;1;1;1	1;1;1;1	Cell division cycle protein 123 homolog	CDC123	;;;	4	1	1	1	1	1	1	1	1	1	1	1	1	1	1	1	1	1	1	1	1	1	6.4	6.4	6.4	17.777	157	157;183;295;336	1	6	0	3.028	6.4	6.4	6.4	6.4	6.4	6.4	879940	234550	149770	157010
P07737;K7EJ44;CON__P02584;I3L3D5	P07737;K7EJ44;CON__P02584	3;2;2;1	3;2;2;1	3;2;2;1	Profilin-1	PFN1	;;	4	3	3	3	0	2	1	0	2	1	0	2	1	0	2	1	0	2	1	0	2	1	24.3	24.3	24.3	15.054	140	140;104;140;165	1	6	0	4.8915	0	14.3	5.7	0	15.7	5.7	3009900	0	748920	357250
P08621;M0QYR1;M0QX04	P08621;M0QYR1	4;2;1	4;2;1	4;2;1	U1 small nuclear ribonucleoprotein 70 kDa	SNRNP70	;	3	4	4	4	1	0	2	1	0	1	1	0	2	1	0	1	1	0	2	1	0	1	10.5	10.5	10.5	51.556	437	437;94;33	1	5	0	4.8217	3.4	0	4.6	3.4	0	2.5	1353700	112730	0	903560
P0DN76;Q01081;K7EJH3;A0A1B0GW87;K7EJM7;M0QYK5;M0R2N4;Q8WU68	P0DN76;Q01081;K7EJH3;A0A1B0GW87;K7EJM7;M0QYK5;M0R2N4;Q8WU68	2;2;1;1;1;1;1;1	2;2;1;1;1;1;1;1	2;2;1;1;1;1;1;1	Splicing factor U2AF 35 kDa subunit;Splicing factor U2AF 26 kDa subunit	U2AF1;U2AF1L4	;;;;;;;	8	2	2	2	1	1	1	1	1	1	1	1	1	1	1	1	1	1	1	1	1	1	12.5	12.5	12.5	27.872	240	240;240;39;45;51;66;97;220	1	6	0	4.3705	5	7.5	5	5	5	5	1191400	117190	673110	65364
P17066;P48741	P17066;P48741	9;5	1;1	1;1	Heat shock 70 kDa protein 6;Putative heat shock 70 kDa protein 7	HSPA6;HSPA7	;	2	9	1	1	8	8	7	7	6	7	1	1	1	1	1	1	1	1	1	1	1	1	14.2	1.7	1.7	71.027	643	643;367	1	6	0	3.3582	14.2	14.2	12.3	12.8	11.2	12.3	73566000	10058000	5101100	5302100
P56282	P56282	1	1	1	DNA polymerase epsilon subunit 2	POLE2		1	1	1	1	1	1	1	1	1	1	1	1	1	1	1	1	1	1	1	1	1	1	2.7	2.7	2.7	59.536	527	527	1	6	0	4.0535	2.7	2.7	2.7	2.7	2.7	2.7	815760	198740	102870	124730
P62191	P62191	2	2	2	26S protease regulatory subunit 4	PSMC1		1	2	2	2	1	2	1	1	0	1	1	2	1	1	0	1	1	2	1	1	0	1	6.4	6.4	6.4	49.184	440	440	1	6	0	7.9684	3.4	6.4	3.4	3.4	0	3	816090	170680	270160	108150
P62304	P62304	1	1	1	Small nuclear ribonucleoprotein E	SNRPE		1	1	1	1	1	1	1	1	1	1	1	1	1	1	1	1	1	1	1	1	1	1	12	12	12	10.803	92	92	1	6	0	2.3935	12	12	12	12	12	12	11437000	2739800	1847200	1776000
P62306	P62306	1	1	1	Small nuclear ribonucleoprotein F	SNRPF		1	1	1	1	1	1	1	1	1	1	1	1	1	1	1	1	1	1	1	1	1	1	15.1	15.1	15.1	9.7251	86	86	1	6	0	18.479	15.1	15.1	15.1	15.1	15.1	15.1	5640800	1736500	866770	973960
Q13835	Q13835	3	3	3	Plakophilin-1	PKP1		1	3	3	3	1	1	0	2	1	1	1	1	0	2	1	1	1	1	0	2	1	1	7.5	7.5	7.5	82.86	747	747	1	6	0	20.474	4	1.5	0	6	2	2	3756500	229140	286000	0
Q13895;H7BY94	Q13895;H7BY94	4;2	4;2	4;2	Bystin	BYSL	;	2	4	4	4	2	3	1	0	0	0	2	3	1	0	0	0	2	3	1	0	0	0	8.9	8.9	8.9	49.601	437	437;183	1	6	0	6.2033	5	6.9	2.1	0	0	0	830400	364280	243300	222820
Q3KQU3	Q3KQU3	2	2	2	MAP7 domain-containing protein 1	MAP7D1		1	2	2	2	0	0	0	2	2	2	0	0	0	2	2	2	0	0	0	2	2	2	3.2	3.2	3.2	92.819	841	841	1	6	0	4.2825	0	0	0	3.2	3.2	3.2	3914500	0	0	0
Q562R1	Q562R1	8	1	1	Beta-actin-like protein 2	ACTBL2		1	8	1	1	8	8	8	4	3	5	1	1	1	0	0	0	1	1	1	0	0	0	22.3	4.8	4.8	42.003	376	376	1	5	1	-2	22.3	22.3	22.3	15.4	13.3	17.6	1445400000	584480000	398080000	462820000
Q7Z5K2	Q7Z5K2	1	1	1	Wings apart-like protein homolog	WAPAL		1	1	1	1	1	1	1	1	1	1	1	1	1	1	1	1	1	1	1	1	1	1	1.5	1.5	1.5	132.94	1190	1190	1	6	0.0030992	2.0466	1.5	1.5	1.5	1.5	1.5	1.5	697830	162080	124290	82646
Q86Y56;H0Y650;E9PGY2	Q86Y56;H0Y650;E9PGY2	4;3;2	4;3;2	4;3;2	Dynein assembly factor 5, axonemal	DNAAF5	;;	3	4	4	4	3	2	1	0	0	0	3	2	1	0	0	0	3	2	1	0	0	0	6.1	6.1	6.1	93.52	855	855;657;280	1	6	0	7.1385	4.7	2.8	1.4	0	0	0	3182300	1712300	934270	535750
Q8IXB1;E7EP04	Q8IXB1	3;1	3;1	3;1	DnaJ homolog subfamily C member 10	DNAJC10		2	3	3	3	0	0	0	1	2	3	0	0	0	1	2	3	0	0	0	1	2	3	5.8	5.8	5.8	91.079	793	793;275	1	6	0	4.2975	0	0	0	1.3	2.8	5.8	2581800	0	0	0
Q8N726	Q8N726	2	2	2	Tumor suppressor ARF	CDKN2A		1	2	2	2	0	0	0	2	2	1	0	0	0	2	2	1	0	0	0	2	2	1	22.7	22.7	22.7	13.903	132	132	1	5	0	2.4766	0	0	0	22.7	22.7	6.1	2231100	0	0	0
Q92667	Q92667	1	1	1	A-kinase anchor protein 1, mitochondrial	AKAP1		1	1	1	1	1	1	1	1	1	1	1	1	1	1	1	1	1	1	1	1	1	1	2.7	2.7	2.7	97.34	903	903	1	6	0	3.0516	2.7	2.7	2.7	2.7	2.7	2.7	376730	82775	83483	55468
V9GYM8;Q92974;V9GYF5;V9GYG5;V9GZ14;V9GYF0	V9GYM8;Q92974	5;5;1;1;1;1	5;5;1;1;1;1	5;5;1;1;1;1	Rho guanine nucleotide exchange factor 2	ARHGEF2	;	6	5	5	5	0	0	0	4	1	1	0	0	0	4	1	1	0	0	0	4	1	1	6.1	6.1	6.1	116.07	1031	1031;986;178;214;229;263	1	6	0	6.139	0	0	0	4.9	1.1	1.2	2256200	0	0	0
Q96QU8;I3L0S8	Q96QU8;I3L0S8	2;1	2;1	2;1	Exportin-6	XPO6	;	2	2	2	2	2	1	1	1	0	1	2	1	1	1	0	1	2	1	1	1	0	1	3.4	3.4	3.4	128.88	1125	1125;135	1	6	0	2.5885	3.4	1.3	1.3	2	0	2	294870	139520	21237	12158
Q9BXW9;H7BZJ7	Q9BXW9	3;1	3;1	3;1	Fanconi anemia group D2 protein	FANCD2		2	3	3	3	2	1	1	0	1	1	2	1	1	0	1	1	2	1	1	0	1	1	3.4	3.4	3.4	164.13	1451	1451;749	1	6	0	4.737	2.3	1	1	0	1	1	3749900	208350	87079	93824
Q9HC07;D6RBL0;D6RD79;V9GY93	Q9HC07;D6RBL0;D6RD79;V9GY93	2;1;1;1	2;1;1;1	2;1;1;1	Transmembrane protein 165	TMEM165	;;;	4	2	2	2	2	0	1	1	1	1	2	0	1	1	1	1	2	0	1	1	1	1	13.9	13.9	13.9	34.905	324	324;76;129;158	1	6	0	4.1271	13.9	0	6.2	7.7	7.7	7.7	6180900	2845500	0	540170
Q9HC21;J3KTL0;J3QLV3;J3KRY6;J3KSB1;J3KSI7;J3QL84;J3KS44	Q9HC21;J3KTL0;J3QLV3;J3KRY6	4;2;2;2;1;1;1;1	4;2;2;2;1;1;1;1	4;2;2;2;1;1;1;1	Mitochondrial thiamine pyrophosphate carrier	SLC25A19	;;;	8	4	4	4	1	0	1	1	2	1	1	0	1	1	2	1	1	0	1	1	2	1	11.6	11.6	11.6	35.511	320	320;84;153;182;67;85;105;151	1	6	0	3.6802	2.5	0	3.1	3.1	5.9	3.1	4538300	480490	0	530950
Q9NXF1	Q9NXF1	2	2	2	Testis-expressed sequence 10 protein	TEX10		1	2	2	2	2	2	2	0	0	0	2	2	2	0	0	0	2	2	2	0	0	0	3.3	3.3	3.3	105.67	929	929	1	6	0	4.5203	3.3	3.3	3.3	0	0	0	1246300	627180	293290	325780
Q9P2I0	Q9P2I0	1	1	1	Cleavage and polyadenylation specificity factor subunit 2	CPSF2		1	1	1	1	1	1	1	1	1	1	1	1	1	1	1	1	1	1	1	1	1	1	1.7	1.7	1.7	88.486	782	782	1	6	0	3.2481	1.7	1.7	1.7	1.7	1.7	1.7	290590	63590	57585	39394
Q9UH62;H3BV87	Q9UH62	4;1	4;1	4;1	Armadillo repeat-containing X-linked protein 3	ARMCX3		2	4	4	4	1	0	1	0	1	3	1	0	1	0	1	3	1	0	1	0	1	3	15	15	15	42.5	379	379;94	1	6	0	4.4154	2.6	0	6.3	0	6.3	12.4	1950900	277340	0	137920
Q9Y266;A0A0A0MSS4;A0A0A0MSU9	Q9Y266	4;1;1	4;1;1	4;1;1	Nuclear migration protein nudC	NUDC		3	4	4	4	0	0	0	3	3	0	0	0	0	3	3	0	0	0	0	3	3	0	14.2	14.2	14.2	38.242	331	331;133;186	1	6	0	7.3897	0	0	0	10.6	9.7	0	3129500	0	0	0
Q9Y5M8;H7C4H2	Q9Y5M8;H7C4H2	2;1	2;1	2;1	Signal recognition particle receptor subunit beta	SRPRB	;	2	2	2	2	1	0	0	2	1	2	1	0	0	2	1	2	1	0	0	2	1	2	12.9	12.9	12.9	29.702	271	271;160	1	6	0	4.5523	7	0	0	12.9	7	12.9	4357800	1308400	0	0
Q9Y5U8	Q9Y5U8	1	1	1	Mitochondrial pyruvate carrier 1	MPC1		1	1	1	1	1	1	1	1	1	1	1	1	1	1	1	1	1	1	1	1	1	1	23.9	23.9	23.9	12.347	109	109	1	6	0	7.7632	23.9	23.9	23.9	23.9	23.9	23.9	1766300	478030	365320	232370
Q9Y6D5;E5RHL7	Q9Y6D5	3;1	2;0	2;0	Brefeldin A-inhibited guanine nucleotide-exchange protein 2	ARFGEF2		2	3	2	2	2	2	0	1	1	1	1	2	0	1	1	1	1	2	0	1	1	1	2.3	1.7	1.7	202.04	1785	1785;825	1	6	0	3.3775	1.3	1.7	0	0.7	0.7	0.7	409630	153530	134950	0
REV__P22059	REV__P22059	1	1	1				1	1	1	1	1	1	1	1	1	1	1	1	1	1	1	1	1	1	1	1	1	1	0	0	0	89.42	807	807	1	6	0.0021053	2.1348	0	0	0	0	0	0	20732000	4661600	2940000	3060100
REV__Q86SP6	REV__Q86SP6	1	1	1				1	1	1	1	1	1	1	1	1	1	1	1	1	1	1	1	1	1	1	1	1	1	0	0	0	80.983	731	731	1	6	0.0049603	1.8897	0	0	0	0	0	0	3232400	825780	476870	594520
A0A087WY75;A0A075B7F8;A8CG34;Q96HA1;C9JFL1	A0A087WY75;A0A075B7F8;A8CG34;Q96HA1;C9JFL1	2;2;2;2;1	2;2;2;2;1	2;2;2;2;1	Nuclear envelope pore membrane protein POM 121C;Nuclear envelope pore membrane protein POM 121	POM121C;POM121	;;;;	5	2	2	2	0	0	0	2	2	1	0	0	0	2	2	1	0	0	0	2	2	1	3.5	3.5	3.5	99.135	987	987;1229;1229;1249;107	1	5	0	2.8726	0	0	0	3.5	3.5	1.1	3766900	0	0	0
F5H5N1;A0A087WXF6;A0A087WTI3;F5GXJ1;O75251	F5H5N1;A0A087WXF6;A0A087WTI3;F5GXJ1;O75251	2;2;2;2;2	2;2;2;2;2	2;2;2;2;2	NADH dehydrogenase [ubiquinone] iron-sulfur protein 7, mitochondrial	NDUFS7	;;;;	5	2	2	2	1	1	1	0	1	1	1	1	1	0	1	1	1	1	1	0	1	1	12.6	12.6	12.6	19.77	182	182;214;214;236;213	1	5	0	3.6584	4.9	4.9	4.9	0	7.7	7.7	4569900	1351100	865990	1016800
A0A0C4DH00;A0A087WTU1;A0A0B4J2G4;Q15345	A0A0C4DH00;A0A087WTU1;A0A0B4J2G4;Q15345	1;1;1;1	1;1;1;1	1;1;1;1	Leucine-rich repeat-containing protein 41	LRRC41	;;;	4	1	1	1	0	1	1	1	1	1	0	1	1	1	1	1	0	1	1	1	1	1	2.9	2.9	2.9	67	617	617;620;790;812	1	5	0.004	1.9168	0	2.9	2.9	2.9	2.9	2.9	391940	0	54267	47640
H7BXI1;A0A087WXU3;A0FGR8	H7BXI1;A0A087WXU3;A0FGR8	1;1;1	1;1;1	1;1;1	Extended synaptotagmin-2	ESYT2	;;	3	1	1	1	1	1	1	0	1	0	1	1	1	0	1	0	1	1	1	0	1	0	1	1	1	98.008	884	884;921;921	1	4	0.0067437	1.7667	1	1	1	0	1	0	1608000	372160	426930	403470
A0A087WY61;Q14980;H0YFY6	A0A087WY61;Q14980;H0YFY6	3;3;2	3;3;2	3;3;2	Nuclear mitotic apparatus protein 1	NUMA1	;;	3	3	3	3	0	1	0	1	1	2	0	1	0	1	1	2	0	1	0	1	1	2	2.3	2.3	2.3	236.16	2099	2099;2115;964	1	5	0	3.3526	0	0.8	0	0.8	0.8	1.6	628580	0	80707	0
A0A087X1A5;Q5JW30;O95793	A0A087X1A5;Q5JW30;O95793	1;1;1	1;1;1	1;1;1	Double-stranded RNA-binding protein Staufen homolog 1	STAU1	;;	3	1	1	1	1	1	1	1	1	0	1	1	1	1	1	0	1	1	1	1	1	0	2.6	2.6	2.6	54.945	493	493;494;577	1	5	0	2.8362	2.6	2.6	2.6	2.6	2.6	0	578890	225550	120770	128670
E9PFF2;A0A0B4J1R6;P29401	E9PFF2;A0A0B4J1R6;P29401	1;1;1	1;1;1	1;1;1	Transketolase	TKT	;;	3	1	1	1	1	1	1	1	0	0	1	1	1	1	0	0	1	1	1	1	0	0	5.1	5.1	5.1	36.449	334	334;457;623	1	4	0.0040775	1.975	5.1	5.1	5.1	5.1	0	0	114330	39300	33874	41151
H7BY36;A0A0D9SFL3;B0QYK0;C9JGE3;Q01844	H7BY36;A0A0D9SFL3;B0QYK0;C9JGE3;Q01844	1;1;1;1;1	1;1;1;1;1	1;1;1;1;1	RNA-binding protein EWS	EWSR1	;;;;	5	1	1	1	1	1	0	1	1	1	1	1	0	1	1	1	1	1	0	1	1	1	4.5	4.5	4.5	32.071	308	308;584;618;620;656	1	5	0	2.8007	4.5	4.5	0	4.5	4.5	4.5	2316800	639660	426730	0
A0A0G2JMS7	A0A0G2JMS7	86	2	2				1	86	2	2	13	11	14	78	81	81	0	0	0	2	1	2	0	0	0	2	1	2	62.2	0.6	0.6	165.27	1549	1549	1	5	0	3.8992	12.5	11.1	14.5	59.2	61.1	59.3	15702000	0	0	0
A0A0G2JQ62;Q8NF37;A0A0G2JRI7	A0A0G2JQ62;Q8NF37;A0A0G2JRI7	2;2;1	2;2;1	2;2;1	Lysophosphatidylcholine acyltransferase 1	LPCAT1	;;	3	2	2	2	2	2	1	0	0	0	2	2	1	0	0	0	2	2	1	0	0	0	5.7	5.7	5.7	54.472	489	489;534;234	1	5	0	8.453	5.7	5.7	3.1	0	0	0	659150	332720	162500	163930
A5YKK6;H3BMZ2;H3BNB1	A5YKK6;H3BMZ2	3;2;1	3;2;1	3;2;1	CCR4-NOT transcription complex subunit 1	CNOT1	;	3	3	3	3	0	3	0	1	0	1	0	3	0	1	0	1	0	3	0	1	0	1	1.9	1.9	1.9	266.94	2376	2376;439;185	1	5	0	4.4711	0	1.9	0	0.6	0	0.6	606580	0	539940	0
B0QY90;B0QY89;Q9Y262	B0QY90;B0QY89;Q9Y262	2;2;2	2;2;2	2;2;2	Eukaryotic translation initiation factor 3 subunit L	EIF3L	;;	3	2	2	2	1	0	1	1	1	1	1	0	1	1	1	1	1	0	1	1	1	1	6.2	6.2	6.2	55.161	466	466;607;564	1	5	0	3.2619	3.6	0	3.6	2.6	2.6	2.6	277460	86976	0	34725
F8WE65;C9J5S7;P62937	F8WE65;C9J5S7;P62937	1;1;1	1;1;1	1;1;1	Peptidyl-prolyl cis-trans isomerase;Peptidyl-prolyl cis-trans isomerase A;Peptidyl-prolyl cis-trans isomerase A, N-terminally processed	PPIA	;;	3	1	1	1	1	0	1	1	1	1	1	0	1	1	1	1	1	0	1	1	1	1	7.5	7.5	7.5	13.022	120	120;121;165	1	5	0.0010776	2.311	7.5	0	7.5	7.5	7.5	7.5	3707100	564200	0	703420
C9JVN9;Q9H9P8	C9JVN9;Q9H9P8	2;2	2;2	2;2	L-2-hydroxyglutarate dehydrogenase, mitochondrial	L2HGDH	;	2	2	2	2	1	0	1	1	1	1	1	0	1	1	1	1	1	0	1	1	1	1	8.2	8.2	8.2	48.475	441	441;463	1	5	0	4.7961	2.7	0	5.4	5.4	5.4	5.4	408390	123370	0	33462
CON__P00735	CON__P00735	1	1	1				1	1	1	1	1	1	1	1	1	0	1	1	1	1	1	0	1	1	1	1	1	0	3.2	3.2	3.2	70.505	625	625	1	5	0	7.7205	3.2	3.2	3.2	3.2	3.2	0	1344400	399780	190390	277410
CON__P04258;P02461	CON__P04258;P02461	1;1	1;1	1;1	Collagen alpha-1(III) chain	COL3A1	;	2	1	1	1	1	1	1	1	0	1	1	1	1	1	0	1	1	1	1	1	0	1	0.8	0.8	0.8	138.44	1466	1466;1466	1	5	0.0040568	1.9626	0.8	0.8	0.8	0.8	0	0.8	6766800	1656800	905790	921250
CON__Q1RMN8	CON__Q1RMN8	1	1	1				1	1	1	1	1	1	1	1	1	0	1	1	1	1	1	0	1	1	1	1	1	0	6.4	6.4	6.4	24.536	234	234	1	5	0	21.893	6.4	6.4	6.4	6.4	6.4	0	11008000	2250600	1800500	1306700
E7ES68;G5E9D5;Q9BQ52;H7C2I4;V9GYS7	E7ES68;G5E9D5;Q9BQ52;H7C2I4	3;3;3;2;1	3;3;3;2;1	3;3;3;2;1	Zinc phosphodiesterase ELAC protein 2	ELAC2	;;;	5	3	3	3	2	2	0	1	0	0	2	2	0	1	0	0	2	2	0	1	0	0	7.3	7.3	7.3	70.106	626	626;807;826;286;242	1	5	0	3.5073	6.2	4.3	0	1.1	0	0	2250500	255630	1345100	0
E9PJA7;E9PK09;E9PQN2;E9PKI6;E9PK91;Q9NYF8;H0YF00	E9PJA7;E9PK09;E9PQN2;E9PKI6;E9PK91;Q9NYF8;H0YF00	2;2;2;2;2;2;1	2;2;2;2;2;2;1	2;2;2;2;2;2;1	Bcl-2-associated transcription factor 1	BCLAF1	;;;;;;	7	2	2	2	2	2	1	0	0	0	2	2	1	0	0	0	2	2	1	0	0	0	5.6	5.6	5.6	52.917	467	467;725;750;752;871;920;118	1	5	0	3.0654	5.6	5.6	3	0	0	0	1439700	678420	467830	293420
Q5VU77;F8W726;Q14157	Q5VU77;F8W726;Q14157	1;1;1	1;1;1	1;1;1	Ubiquitin-associated protein 2-like	UBAP2L	;;	3	1	1	1	1	1	1	1	1	0	1	1	1	1	1	0	1	1	1	1	1	0	2.6	2.6	2.6	37.961	350	350;1079;1087	1	5	0	2.5809	2.6	2.6	2.6	2.6	2.6	0	1190100	415040	138720	326520
H0Y3T6;Q9BRK5;G3V1E2	H0Y3T6;Q9BRK5;G3V1E2	2;2;1	2;2;1	2;2;1	45 kDa calcium-binding protein	SDF4	;;	3	2	2	2	1	1	2	1	0	0	1	1	2	1	0	0	1	1	2	1	0	0	16.9	16.9	16.9	28.001	243	243;362;254	1	5	0	5.9052	11.5	11.5	16.9	11.5	0	0	846230	141940	126510	414380
H0Y564;Q9H1A4	H0Y564;Q9H1A4	1;1	1;1	1;1	Anaphase-promoting complex subunit 1	ANAPC1	;	2	1	1	1	1	1	1	0	1	1	1	1	1	0	1	1	1	1	1	0	1	1	1.3	1.3	1.3	161.45	1452	1452;1944	1	5	0	2.4147	1.3	1.3	1.3	0	1.3	1.3	318990	89999	58833	67340
H0YNF5;H0YL72;P50213	H0YNF5;H0YL72;P50213	1;1;1	1;1;1	1;1;1	Isocitrate dehydrogenase [NAD] subunit alpha, mitochondrial	IDH3A	;;	3	1	1	1	1	0	1	1	0	1	1	0	1	1	0	1	1	0	1	1	0	1	19.5	19.5	19.5	9.3178	87	87;331;366	1	5	0.0039761	1.8947	19.5	0	19.5	19.5	0	19.5	94241	51897	0	13605
H3BQR2;Q9Y5Y2;B7Z6P0;H3BRE1;H3BNF0;H3BNS4	H3BQR2;Q9Y5Y2;B7Z6P0;H3BRE1;H3BNF0;H3BNS4	2;2;1;1;1;1	2;2;1;1;1;1	2;2;1;1;1;1	Cytosolic Fe-S cluster assembly factor NUBP2	NUBP2	;;;;;	6	2	2	2	0	1	1	1	1	1	0	1	1	1	1	1	0	1	1	1	1	1	23.7	23.7	23.7	22.784	211	211;271;130;144;251;271	1	5	0	3.8794	0	10.9	12.8	10.9	12.8	10.9	1207800	0	135840	202200
J3KN67;D6RGJ6	J3KN67	18;1	2;1	0;0		TPM3		2	18	2	0	15	18	17	0	1	1	2	2	1	0	0	0	0	0	0	0	0	0	47.7	11.2	0	33.222	285	285;75	1	5	0	5.4789	42.8	47.7	43.2	0	4.2	3.5	53945000	32560000	19664000	1720500
J3KPS0;Q9NXW2;V9GYN7;V9GY70	J3KPS0;Q9NXW2;V9GYN7	3;3;2;1	3;3;2;1	3;3;2;1	DnaJ homolog subfamily B member 12	DNAJB12	;;	4	3	3	3	2	1	1	0	1	0	2	1	1	0	1	0	2	1	1	0	1	0	14.7	14.7	14.7	45.489	409	409;375;276;172	1	5	0	2.6124	8.6	6.1	4.6	0	3.9	0	1399900	611560	300200	56739
M0QX52;K7EL66;K7ERD8;Q15555	M0QX52;K7EL66;K7ERD8;Q15555	1;1;1;1	1;1;1;1	1;1;1;1	Microtubule-associated protein RP/EB family member 2	MAPRE2	;;;	4	1	1	1	1	1	1	1	0	1	1	1	1	1	0	1	1	1	1	1	0	1	9.4	9.4	9.4	14.92	127	127;134;194;327	1	5	0	5.4595	9.4	9.4	9.4	9.4	0	9.4	1061800	273940	218080	210750
O14976	O14976	1	1	1	Cyclin-G-associated kinase	GAK		1	1	1	1	1	0	1	1	1	1	1	0	1	1	1	1	1	0	1	1	1	1	1.3	1.3	1.3	143.19	1311	1311	1	5	0.0094787	1.673	1.3	0	1.3	1.3	1.3	1.3	232060	43622	0	28237
Q5TBH6;Q5TBH8;O15228	Q5TBH6;Q5TBH8;O15228	1;1;1	1;1;1	1;1;1	Dihydroxyacetone phosphate acyltransferase	GNPAT	;;	3	1	1	1	1	1	1	1	1	0	1	1	1	1	1	0	1	1	1	1	1	0	5.9	5.9	5.9	25.225	222	222;587;680	1	5	0	3.0838	5.9	5.9	5.9	5.9	5.9	0	540700	139730	105310	109410
O60343	O60343	3	3	3	TBC1 domain family member 4	TBC1D4		1	3	3	3	1	2	1	0	0	0	1	2	1	0	0	0	1	2	1	0	0	0	3.2	3.2	3.2	146.56	1298	1298	1	5	0	8.2686	0.9	2	1.2	0	0	0	681070	102800	187110	391160
P00918	P00918	1	1	1	Carbonic anhydrase 2	CA2		1	1	1	1	1	0	1	1	1	1	1	0	1	1	1	1	1	0	1	1	1	1	6.2	6.2	6.2	29.246	260	260	1	5	0.0030928	2.0386	6.2	0	6.2	6.2	6.2	6.2	395410	73040	0	61418
P07858;R4GMQ5	P07858;R4GMQ5	2;1	2;1	2;1	Cathepsin B;Cathepsin B light chain;Cathepsin B heavy chain	CTSB	;	2	2	2	2	0	0	0	2	1	2	0	0	0	2	1	2	0	0	0	2	1	2	10.6	10.6	10.6	37.821	339	339;76	1	5	0	5.2492	0	0	0	10.6	5.3	10.6	3033800	0	0	0
P10599	P10599	3	3	3	Thioredoxin	TXN		1	3	3	3	2	0	1	0	1	0	2	0	1	0	1	0	2	0	1	0	1	0	34.3	34.3	34.3	11.737	105	105	1	4	0	5.9834	23.8	0	11.4	0	10.5	0	5815800	3805200	0	1226800
P12277;H0YJG0;G3V4N7	P12277;H0YJG0;G3V4N7	2;1;1	2;1;1	2;1;1	Creatine kinase B-type	CKB	;;	3	2	2	2	1	0	0	2	1	1	1	0	0	2	1	1	1	0	0	2	1	1	12.9	12.9	12.9	42.644	381	381;179;217	1	5	0	2.329	4.5	0	0	12.9	4.5	4.5	547440	70543	0	0
P23458	P23458	1	1	1	Tyrosine-protein kinase JAK1	JAK1		1	1	1	1	1	1	1	1	0	0	1	1	1	1	0	0	1	1	1	1	0	0	1.3	1.3	1.3	133.28	1154	1154	1	4	0.0039841	1.8967	1.3	1.3	1.3	1.3	0	0	149490	46563	32526	33395
P29508;C9JZ65;H0Y5H9;P48594	P29508;C9JZ65;H0Y5H9;P48594	4;3;3;3	4;3;3;3	4;3;3;3	Serpin B3;Serpin B4	SERPINB3;SERPINB4	;;;	4	4	4	4	0	1	0	1	1	2	0	1	0	1	1	2	0	1	0	1	1	2	14.6	14.6	14.6	44.564	390	390;211;371;390	1	5	0	8.7979	0	2.6	0	2.6	3.1	9	1002400	0	44202	0
P33947;H7BYF7	P33947;H7BYF7	2;1	2;1	2;1	ER lumen protein-retaining receptor 2	KDELR2	;	2	2	2	2	1	0	0	2	2	0	1	0	0	2	2	0	1	0	0	2	2	0	13.7	13.7	13.7	24.422	212	212;38	1	5	0	2.9655	8	0	0	13.7	13.7	0	472900	82244	0	0
P35251	P35251	1	1	1	Replication factor C subunit 1	RFC1		1	1	1	1	1	1	1	1	0	1	1	1	1	1	0	1	1	1	1	1	0	1	1	1	1	128.25	1148	1148	1	5	0	2.8471	1	1	1	1	0	1	535310	140830	107110	97949
P48735;H0YL11	P48735;H0YL11	3;2	3;2	3;2	Isocitrate dehydrogenase [NADP], mitochondrial	IDH2	;	2	3	3	3	3	1	1	0	0	0	3	1	1	0	0	0	3	1	1	0	0	0	6.4	6.4	6.4	50.909	452	452;312	1	5	0	4.0795	6.4	2.4	1.5	0	0	0	2107900	1405900	480180	221850
P49761	P49761	2	2	2	Dual specificity protein kinase CLK3	CLK3		1	2	2	2	1	1	0	1	1	1	1	1	0	1	1	1	1	1	0	1	1	1	6	6	6	73.514	638	638	1	5	0	4.0693	2.8	3.1	0	3.1	3.1	3.1	954650	170450	99852	0
Q5SX87;P50395;V9GYF8;Q5SX90;Q5SX86;Q5SX91;P31150	Q5SX87;P50395;V9GYF8;Q5SX90;Q5SX86;Q5SX91;P31150	2;2;1;1;1;1;1	2;2;1;1;1;1;1	2;2;1;1;1;1;1	Rab GDP dissociation inhibitor beta;Rab GDP dissociation inhibitor alpha	GDI2;GDI1	;;;;;;	7	2	2	2	1	1	1	2	0	0	1	1	1	2	0	0	1	1	1	2	0	0	14.4	14.4	14.4	29.856	263	263;445;130;148;155;203;447	1	5	0	3.1441	7.2	7.2	7.2	14.4	0	0	394330	65547	44000	70371
P52789	P52789	1	1	1	Hexokinase-2	HK2		1	1	1	1	1	1	1	0	1	1	1	1	1	0	1	1	1	1	1	0	1	1	2.3	2.3	2.3	102.38	917	917	1	5	0	6.7295	2.3	2.3	2.3	0	2.3	2.3	454960	152560	75640	93652
Q01650	Q01650	2	2	2	Large neutral amino acids transporter small subunit 1	SLC7A5		1	2	2	2	2	2	1	0	0	0	2	2	1	0	0	0	2	2	1	0	0	0	6.3	6.3	6.3	55.01	507	507	1	5	0	5.478	6.3	6.3	2.8	0	0	0	2647600	1290800	1035100	321690
Q13200;H7C1H2;H7C2Q3;C9JPC0	Q13200;H7C1H2	4;2;1;1	4;2;1;1	4;2;1;1	26S proteasome non-ATPase regulatory subunit 2	PSMD2	;	4	4	4	4	1	1	1	1	1	0	1	1	1	1	1	0	1	1	1	1	1	0	6.3	6.3	6.3	100.2	908	908;203;143;217	1	5	0	3.3473	1.9	1.9	1	2.1	1.3	0	503370	37551	37198	237590
Q15052	Q15052	6	2	2	Rho guanine nucleotide exchange factor 6	ARHGEF6		1	6	2	2	0	0	0	4	5	5	0	0	0	1	2	2	0	0	0	1	2	2	8	3.1	3.1	87.498	776	776	1	5	0	5.6652	0	0	0	6.2	6.2	6.2	2114000	0	0	0
Q86YV9	Q86YV9	1	1	1	Hermansky-Pudlak syndrome 6 protein	HPS6		1	1	1	1	1	1	1	1	0	1	1	1	1	1	0	1	1	1	1	1	0	1	3	3	3	82.974	775	775	1	5	0.0010526	2.1356	3	3	3	3	0	3	571720	159510	90133	94908
Q8IY81	Q8IY81	3	3	3	pre-rRNA processing protein FTSJ3	FTSJ3		1	3	3	3	1	2	2	0	0	0	1	2	2	0	0	0	1	2	2	0	0	0	3.4	3.4	3.4	96.557	847	847	1	5	0	3.3231	0.9	2.5	1.9	0	0	0	2328100	662140	456590	1209400
Q8NBX0	Q8NBX0	1	1	1	Saccharopine dehydrogenase-like oxidoreductase	SCCPDH		1	1	1	1	1	0	1	1	1	0	1	0	1	1	1	0	1	0	1	1	1	0	6.8	6.8	6.8	47.151	429	429	1	4	0	2.3276	6.8	0	6.8	6.8	6.8	0	206550	72533	0	40167
Q92973;E7EW37	Q92973;E7EW37	3;2	3;2	3;2	Transportin-1	TNPO1	;	2	3	3	3	2	2	1	0	0	0	2	2	1	0	0	0	2	2	1	0	0	0	4.6	4.6	4.6	102.35	898	898;136	1	5	0	5.2778	3.5	2.3	2.2	0	0	0	2232200	1264800	859020	108380
Q92990;M0QX84	Q92990;M0QX84	2;1	2;1	2;1	Glomulin	GLMN	;	2	2	2	2	1	2	1	1	0	0	1	2	1	1	0	0	1	2	1	1	0	0	6.2	6.2	6.2	68.207	594	594;245	1	5	0	2.5492	3	6.2	3	3	0	0	248000	81435	74132	46571
Q96K37;H7C1I0	Q96K37;H7C1I0	2;1	2;1	2;1	Solute carrier family 35 member E1	SLC35E1	;	2	2	2	2	2	0	0	1	1	1	2	0	0	1	1	1	2	0	0	1	1	1	8.8	8.8	8.8	44.772	410	410;344	1	5	0	14.189	8.8	0	0	5.9	5.9	5.9	1323000	511770	0	0
Q9BWN1;H3BQL8;H3BND2	Q9BWN1	3;1;1	3;1;1	3;1;1	Proline-rich protein 14	PRR14		3	3	3	3	0	0	0	3	1	1	0	0	0	3	1	1	0	0	0	3	1	1	6.2	6.2	6.2	64.328	585	585;104;242	1	5	0	3.8655	0	0	0	6.2	1.9	1.4	2798500	0	0	0
Q9H4L7;D6RAY8	Q9H4L7;D6RAY8	2;1	2;1	2;1	SWI/SNF-related matrix-associated actin-dependent regulator of chromatin subfamily A containing DEAD/H box 1	SMARCAD1	;	2	2	2	2	2	1	2	0	0	0	2	1	2	0	0	0	2	1	2	0	0	0	3.7	3.7	3.7	117.4	1026	1026;244	1	5	0	6.83	3.7	1.1	3.7	0	0	0	627800	322140	127270	178390
Q9H9Y6	Q9H9Y6	2	2	2	DNA-directed RNA polymerase I subunit RPA2	POLR1B		1	2	2	2	1	1	1	1	0	1	1	1	1	1	0	1	1	1	1	1	0	1	3.1	3.1	3.1	128.23	1135	1135	1	5	0	3.486	1.1	1.1	1.1	1.9	0	1.9	552170	145430	124430	117390
Q9NR31;X1WI22;D6RAA2;Q5SQT8;D6RDB2;D6RD69;Q9Y6B6	Q9NR31;X1WI22;D6RAA2;Q5SQT8;D6RDB2;D6RD69;Q9Y6B6	2;1;1;1;1;1;1	2;1;1;1;1;1;1	2;1;1;1;1;1;1	GTP-binding protein SAR1a;GTP-binding protein SAR1b	SAR1A;SAR1B	;;;;;;	7	2	2	2	1	1	2	0	0	0	1	1	2	0	0	0	1	1	2	0	0	0	17.2	17.2	17.2	22.367	198	198;50;103;121;144;170;198	1	4	0	7.1595	11.6	5.6	17.2	0	0	0	1229000	135810	456950	636260
Q9NX58	Q9NX58	2	2	2	Cell growth-regulating nucleolar protein	LYAR		1	2	2	2	2	1	1	0	0	1	2	1	1	0	0	1	2	1	1	0	0	1	11.9	11.9	11.9	43.614	379	379	1	5	0	4.3145	11.9	6.6	6.6	0	0	6.6	1846100	1298600	248280	235680
Q9NZT1	Q9NZT1	2	2	2	Calmodulin-like protein 5	CALML5		1	2	2	2	1	1	0	1	0	2	1	1	0	1	0	2	1	1	0	1	0	2	15.1	15.1	15.1	15.892	146	146	1	5	0	3.5442	9.6	9.6	0	9.6	0	15.1	2066900	548870	323720	0
Q9UBB4;B1AHE3	Q9UBB4	3;1	3;1	3;1	Ataxin-10	ATXN10		2	3	3	3	1	0	3	1	0	0	1	0	3	1	0	0	1	0	3	1	0	0	8.8	8.8	8.8	53.488	475	475;126	1	5	0	7.0494	3.6	0	8.8	3.6	0	0	553880	24758	0	497110
Q9Y619;F2Z354;Q5VZD9	Q9Y619;F2Z354;Q5VZD9	2;1;1	2;1;1	2;1;1	Mitochondrial ornithine transporter 1	SLC25A15	;;	3	2	2	2	1	2	1	0	0	1	1	2	1	0	0	1	1	2	1	0	0	1	8.6	8.6	8.6	32.736	301	301;57;133	1	5	0	2.5109	3	8.6	3	0	0	3	2324500	506470	1219900	375760
REV__S4R3K6;REV__Q86VQ0	REV__S4R3K6;REV__Q86VQ0	1;1	1;1	1;1			;	2	1	1	1	1	0	1	1	1	1	1	0	1	1	1	1	1	0	1	1	1	1	0	0	0	50.169	430	430;697	1	5	0.0076849	1.7387	0	0	0	0	0	0	2824700	769670	0	357810
C9JCK5;A0A024RA52;P25787	C9JCK5;A0A024RA52;P25787	1;1;1	1;1;1	1;1;1	Proteasome subunit alpha type;Proteasome subunit alpha type-2	PSMA2	;;	3	1	1	1	0	0	1	1	1	1	0	0	1	1	1	1	0	0	1	1	1	1	11.6	11.6	11.6	18.607	164	164;234;234	1	4	0	2.6599	0	0	11.6	11.6	11.6	11.6	569810	0	0	125530
A0A087WUX8;A0A087WYF7;Q6UXV4	A0A087WUX8;A0A087WYF7;Q6UXV4	1;1;1	1;1;1	1;1;1	MICOS complex subunit MIC27	APOOL	;;	3	1	1	1	1	1	0	1	0	1	1	1	0	1	0	1	1	1	0	1	0	1	4.6	4.6	4.6	28.761	263	263;268;268	1	4	0.0058309	1.7951	4.6	4.6	0	4.6	0	4.6	857430	509370	0	0
A0A087WUZ3;Q01082	A0A087WUZ3;Q01082	2;2	2;2	2;2	Spectrin beta chain, non-erythrocytic 1	SPTBN1	;	2	2	2	2	2	1	1	0	0	0	2	1	1	0	0	0	2	1	1	0	0	0	1.2	1.2	1.2	274.83	2366	2366;2364	1	4	0	4.3183	1.2	0.5	0.5	0	0	0	175570	81789	47760	46024
F1T0B3;A0A087X2G1;Q92499	F1T0B3;A0A087X2G1;Q92499	1;1;1	1;1;1	1;1;1	ATP-dependent RNA helicase DDX1	DDX1	;;	3	1	1	1	1	0	1	1	1	0	1	0	1	1	1	0	1	0	1	1	1	0	3.2	3.2	3.2	73.915	659	659;659;740	1	4	0	4.653	3.2	0	3.2	3.2	3.2	0	399720	118390	0	82257
F8W9B8;A0A0A0MSI8;O00471	F8W9B8;A0A0A0MSI8;O00471	1;1;1	1;1;1	1;1;1	Exocyst complex component 5	EXOC5	;;	3	1	1	1	1	1	1	1	0	0	1	1	1	1	0	0	1	1	1	1	0	0	3.4	3.4	3.4	74.34	643	643;711;708	1	4	0.0020942	2.1092	3.4	3.4	3.4	3.4	0	0	256630	78507	62409	60399
A0A0A6YYJ8;Q9Y383;B8ZZ09;B8ZZ10;A8MYV2;Q9NQ29	A0A0A6YYJ8;Q9Y383	3;3;1;1;1;1	3;3;1;1;1;1	3;3;1;1;1;1	Putative RNA-binding protein Luc7-like 2	LUC7L2	;	6	3	3	3	0	1	0	1	2	0	0	1	0	1	2	0	0	1	0	1	2	0	7.4	7.4	7.4	54.223	458	458;392;84;182;272;371	1	4	0	4.7163	0	3.3	0	2.2	4.1	0	557040	0	0	0
A6NGW1;O95070;E9PS11;E9PIZ0;C9JST7	A6NGW1;O95070;E9PS11;E9PIZ0;C9JST7	2;2;1;1;1	2;2;1;1;1	2;2;1;1;1	Protein YIF1A	YIF1A	;;;;	5	2	2	2	2	0	2	0	0	0	2	0	2	0	0	0	2	0	2	0	0	0	11.2	11.2	11.2	26.377	241	241;293;79;160;199	1	4	0	2.6724	11.2	0	11.2	0	0	0	1222100	721550	0	500570
A9Z1X7;Q8IYB3;M0R088;E9PCT1	A9Z1X7;Q8IYB3;M0R088;E9PCT1	2;2;1;1	2;2;1;1	2;2;1;1	Serine/arginine repetitive matrix protein 1	SRRM1	;;;	4	2	2	2	2	2	2	0	0	1	2	2	2	0	0	1	2	2	2	0	0	1	2.8	2.8	2.8	103.39	913	913;904;681;820	1	7	0	15.536	2.8	2.8	2.8	0	0	1.1	862440	420610	178180	263650
H0YHC3;F8W020;F8W118;F8VXI6;F8VUX1;F8VY35;F8VV59;B7Z9C2;F8W0J6;F5H4R6;H0YIV4;P55209;H0YH88;F8W543;F8VRJ2	H0YHC3;F8W020;F8W118;F8VXI6;F8VUX1;F8VY35;F8VV59;B7Z9C2;F8W0J6;F5H4R6;H0YIV4;P55209;H0YH88;F8W543	3;3;3;3;3;3;3;3;3;3;3;3;2;2;1	3;3;3;3;3;3;3;3;3;3;3;3;2;2;1	3;3;3;3;3;3;3;3;3;3;3;3;2;2;1	Nucleosome assembly protein 1-like 1	NAP1L1	;;;;;;;;;;;;;	15	3	3	3	1	2	0	1	0	0	1	2	0	1	0	0	1	2	0	1	0	0	23.2	23.2	23.2	23.417	198	198;207;209;215;237;264;327;349;379;383;385;391;177;328;114	1	4	0	6.835	8.6	17.7	0	5.6	0	0	1886200	432050	1244900	0
C9J6P4;Q7Z2W4	C9J6P4;Q7Z2W4	1;1	1;1	1;1	Zinc finger CCCH-type antiviral protein 1	ZC3HAV1	;	2	1	1	1	1	1	1	0	1	0	1	1	1	0	1	0	1	1	1	0	1	0	1.5	1.5	1.5	114.08	1024	1024;902	1	4	0	15.787	1.5	1.5	1.5	0	1.5	0	629300	283530	89889	147640
CON__P02663	CON__P02663	2	2	2				1	2	2	2	0	0	1	1	1	2	0	0	1	1	1	2	0	0	1	1	1	2	16.4	16.4	16.4	24.348	207	207	1	5	0	6.028	0	0	10.6	10.6	10.6	16.4	820740	0	0	72754
CON__Q9UE12;CON__Q15323;Q15323;CON__Q14525;CON__A2A5Y0;CON__REFSEQ:XP_986630;Q14525;CON__Q9D646;CON__O76011;A0A140TA62;CON__Q6NTB9;CON__O76009;CON__Q8IUT8;A0A140TA69;CON__Q497I4;CON__O76014;O76009;O76011;Q14532;O76014	CON__Q9UE12;CON__Q15323;Q15323;CON__Q14525;CON__A2A5Y0;CON__REFSEQ:XP_986630;Q14525;CON__Q9D646;CON__O76011;A0A140TA62;CON__Q6NTB9;CON__O76009;CON__Q8IUT8;A0A140TA69;CON__Q497I4;CON__O76014;O76009;O76011;Q14532;O76014	4;4;4;3;3;3;3;2;2;2;2;2;2;2;2;2;2;2;2;2	2;2;2;1;2;2;1;2;1;1;1;1;1;1;0;1;1;1;1;1	2;2;2;1;2;2;1;2;1;1;1;1;1;1;0;1;1;1;1;1	Keratin, type I cuticular Ha1;Keratin, type I cuticular Ha3-II;Keratin, type I cuticular Ha3-I;Keratin, type I cuticular Ha4;Keratin, type I cuticular Ha2;Keratin, type I cuticular Ha7	KRT31;KRT33B;KRT33A;KRT34;KRT32;KRT37	;;;;;;;;;;;;;;;;;;;	20	4	2	2	1	1	2	3	2	2	0	0	0	2	1	1	0	0	0	2	1	1	8.9	5.5	5.5	47.237	416	416;416;416;404;416;476;404;392;394;394;404;404;436;436;455;471;404;436;448;449	1	4	0	3.5271	1.7	1.7	3.4	7.2	3.6	3.6	1870900	0	0	0
E7EQZ4;Q16637;H0YBZ9;A0A0G2JRX5;A0A0G2JRY6;B4DP61	E7EQZ4;Q16637;H0YBZ9;A0A0G2JRX5;A0A0G2JRY6;B4DP61	2;2;1;1;1;1	2;2;1;1;1;1	2;2;1;1;1;1	Survival motor neuron protein	SMN1;SMN2	;;;;;	6	2	2	2	1	1	2	0	0	0	1	1	2	0	0	0	1	1	2	0	0	0	9.9	9.9	9.9	31.689	294	294;294;79;143;180;227	1	4	0	3.1795	6.1	6.1	9.9	0	0	0	4179600	1516500	953830	1709300
E7ERY9;P20020;H0Y7S3;Q16720;P23634;Q01814	E7ERY9;P20020;H0Y7S3;Q16720;P23634;Q01814	3;3;2;2;2;2	3;3;2;2;2;2	3;3;2;2;2;2	Calcium-transporting ATPase;Plasma membrane calcium-transporting ATPase 1;Plasma membrane calcium-transporting ATPase 3;Plasma membrane calcium-transporting ATPase 4;Plasma membrane calcium-transporting ATPase 2	ATP2B1;ATP2B2;ATP2B3;ATP2B4	;;;;;	6	3	3	3	0	1	0	1	1	1	0	1	0	1	1	1	0	1	0	1	1	1	4	4	4	106.86	963	963;1258;1099;1220;1241;1243	1	4	0	4.5636	0	1.1	0	1.1	1.1	1.8	1204200	0	134510	0
E9PIN3;Q9UBU9;E9PLA7	E9PIN3;Q9UBU9;E9PLA7	2;2;1	2;2;1	2;2;1	Nuclear RNA export factor 1	NXF1	;;	3	2	2	2	0	0	0	1	1	2	0	0	0	1	1	2	0	0	0	1	1	2	3.6	3.6	3.6	68.106	603	603;619;115	1	4	0	8.6379	0	0	0	2	2	3.6	367430	0	0	0
E9PLD0;Q9H0U4;Q92928;E7END7;P62820;H0YLJ8;H0YL94;H0YMN7;H0YNE9;Q92930;P61006;P59190	E9PLD0;Q9H0U4;Q92928;E7END7;P62820	3;3;3;2;2;1;1;1;1;1;1;1	2;2;2;1;1;0;0;0;0;0;0;0	2;2;2;1;1;0;0;0;0;0;0;0	Ras-related protein Rab-1B;Putative Ras-related protein Rab-1C;Ras-related protein Rab-1A	RAB1B;RAB1C;RAB1A	;;;;	12	3	2	2	1	2	2	2	2	1	0	1	1	1	1	0	0	1	1	1	1	0	26	19.5	19.5	18.483	169	169;201;201;173;205;47;48;92;188;207;207;212	1	4	0	4.038	6.5	16	16	16.6	16.6	6.5	668090	0	267140	253930
F5H608;O75947	F5H608;O75947	2;2	2;2	2;2	ATP synthase subunit d, mitochondrial	ATP5H	;	2	2	2	2	2	1	1	0	0	0	2	1	1	0	0	0	2	1	1	0	0	0	32.1	32.1	32.1	8.9153	81	81;161	1	4	0.0010582	2.205	32.1	21	21	0	0	0	1314900	486490	304240	524180
F8VY04;F8W1A4;P54819;F8VZG5	F8VY04;F8W1A4;P54819;F8VZG5	2;2;2;1	2;2;2;1	2;2;2;1	Adenylate kinase 2, mitochondrial;Adenylate kinase 2, mitochondrial;Adenylate kinase 2, mitochondrial, N-terminally processed	AK2	;;;	4	2	2	2	1	1	1	1	0	0	1	1	1	1	0	0	1	1	1	1	0	0	21.6	21.6	21.6	21.226	190	190;232;239;162	1	4	0.001065	2.2327	13.2	13.2	13.2	8.4	0	0	116050	49355	33806	32889
F8VYE8;F8W0W8;P36873;F8VR82;A0A087WYY5	F8VYE8;F8W0W8;P36873;F8VR82;A0A087WYY5	9;9;9;8;6	1;1;1;1;1	1;1;1;1;1	Serine/threonine-protein phosphatase;Serine/threonine-protein phosphatase PP1-gamma catalytic subunit	PPP1CC	;;;;	5	9	1	1	8	4	4	5	4	3	1	0	0	1	1	1	1	0	0	1	1	1	34.2	3.3	3.3	34.95	304	304;332;323;270;140	1	4	0.0040363	1.9424	27	13.8	13.8	24.3	17.1	13.5	5144200	977410	0	0
F8W6I7;P09651;F8VYN5;F8W646;H0YH80;F8VZ49	F8W6I7;P09651;F8VYN5;F8W646;H0YH80;F8VZ49	2;2;1;1;1;1	2;2;1;1;1;1	2;2;1;1;1;1	Heterogeneous nuclear ribonucleoprotein A1;Heterogeneous nuclear ribonucleoprotein A1, N-terminally processed	HNRNPA1	;;;;;	6	2	2	2	0	1	1	1	0	1	0	1	1	1	0	1	0	1	1	1	0	1	12.4	12.4	12.4	33.155	307	307;372;113;156;191;231	1	4	0	5.0271	0	6.5	6.5	6.5	0	5.9	439550	0	111340	105750
F8WAH1;Q9UDR5	F8WAH1;Q9UDR5	1;1	1;1	1;1	Alpha-aminoadipic semialdehyde synthase, mitochondrial;Lysine ketoglutarate reductase;Saccharopine dehydrogenase	AASS	;	2	1	1	1	1	1	1	1	0	0	1	1	1	1	0	0	1	1	1	1	0	0	2.5	2.5	2.5	81.037	732	732;926	1	4	0	2.9213	2.5	2.5	2.5	2.5	0	0	277440	98143	65793	63931
G5E9Z2;Q96KA5	G5E9Z2;Q96KA5	1;1	1;1	1;1	Cleft lip and palate transmembrane protein 1-like protein	CLPTM1L	;	2	1	1	1	0	1	0	0	1	1	0	1	0	0	1	1	0	1	0	0	1	1	4.3	4.3	4.3	43.28	369	369;538	1	3	0.004004	1.9182	0	4.3	0	0	4.3	4.3	493020	0	224800	0
H0YLY7	H0YLY7	2	2	1		CHP1		1	2	2	1	0	2	1	1	0	0	0	2	1	1	0	0	0	1	1	1	0	0	22	22	8.8	10.632	91	91	1	4	0.0031348	2.0821	0	22	8.8	8.8	0	0	1401100	0	775100	0
H7BY16;P19338	H7BY16;P19338	1;1	1;1	1;1	Nucleolin	NCL	;	2	1	1	1	1	1	1	0	0	0	1	1	1	0	0	0	1	1	1	0	0	0	7.4	7.4	7.4	32.389	296	296;710	1	3	0	12.57	7.4	7.4	7.4	0	0	0	551830	272440	148260	131130
I3L4Z3;Q9HB40	I3L4Z3;Q9HB40	1;1	1;1	1;1	Retinoid-inducible serine carboxypeptidase	SCPEP1	;	2	1	1	1	1	1	1	0	1	0	1	1	1	0	1	0	1	1	1	0	1	0	8	8	8	19.732	176	176;452	1	4	0	2.388	8	8	8	0	8	0	92896	39519	30789	22588
J3KPT4;Q9H4I3	J3KPT4;Q9H4I3	2;2	2;2	2;2	TraB domain-containing protein	TRABD	;	2	2	2	2	1	1	2	0	0	0	1	1	2	0	0	0	1	1	2	0	0	0	9	9	9	42.692	379	379;376	1	4	0.0094877	1.675	4	5	9	0	0	0	147570	41874	32092	73602
J3QR41;J3KTD6;J3QLN8;Q96GD4;J3KRJ2;J3KRF8;J3KT86	J3QR41;J3KTD6;J3QLN8;Q96GD4;J3KRJ2;J3KRF8;J3KT86	3;3;3;3;2;2;2	3;3;3;3;2;2;2	3;3;3;3;2;2;2	Aurora kinase B	AURKB	;;;;;;	7	3	3	3	0	0	0	1	1	2	0	0	0	1	1	2	0	0	0	1	1	2	23.8	23.8	23.8	20.039	172	172;228;230;344;69;123;242	1	4	0	5.7472	0	0	0	8.7	8.1	15.1	3285600	0	0	0
K7ERQ1;K7ELB1;K7ENQ6;K7EJL0;P26358	K7ERQ1;K7ELB1;K7ENQ6;K7EJL0;P26358	1;1;1;1;1	1;1;1;1;1	1;1;1;1;1	DNA (cytosine-5)-methyltransferase 1	DNMT1	;;;;	5	1	1	1	1	1	1	0	0	0	1	1	1	0	0	0	1	1	1	0	0	0	14.1	14.1	14.1	7.8397	71	71;94;119;255;1616	1	3	0.0058651	1.8227	14.1	14.1	14.1	0	0	0	41493000	17525000	10895000	13073000
K7EQ47;P19623	K7EQ47;P19623	2;2	2;2	2;2	Spermidine synthase	SRM	;	2	2	2	2	1	1	1	1	0	0	1	1	1	1	0	0	1	1	1	1	0	0	19.4	19.4	19.4	14.319	134	134;302	1	4	0	3.8647	9.7	9.7	9.7	9.7	0	0	1729600	267250	522780	535740
O75155	O75155	4	3	3	Cullin-associated NEDD8-dissociated protein 2	CAND2		1	4	3	3	2	2	1	0	0	0	2	1	1	0	0	0	2	1	1	0	0	0	5	4.2	4.2	135.25	1236	1236	1	4	0	2.6189	2.4	2.6	1.8	0	0	0	168480	104540	30639	33295
O75691	O75691	3	3	3	Small subunit processome component 20 homolog	UTP20		1	3	3	3	2	1	1	0	0	0	2	1	1	0	0	0	2	1	1	0	0	0	1.6	1.6	1.6	318.38	2785	2785	1	4	0	3.4465	1	0.4	0.5	0	0	0	333820	153700	58350	121770
O94874	O94874	2	2	2	E3 UFM1-protein ligase 1	UFL1		1	2	2	2	2	1	1	0	0	0	2	1	1	0	0	0	2	1	1	0	0	0	5.4	5.4	5.4	89.594	794	794	1	4	0	4.3506	5.4	2.9	2.9	0	0	0	235130	166910	37164	31050
O95470;H0Y3V8;H7BXL7	O95470;H0Y3V8;H7BXL7	2;1;1	2;1;1	2;1;1	Sphingosine-1-phosphate lyase 1	SGPL1	;;	3	2	2	2	1	1	1	0	0	0	1	1	1	0	0	0	1	1	1	0	0	0	6.2	6.2	6.2	63.523	568	568;135;202	1	3	0	3.2191	2.6	3.5	2.6	0	0	0	519390	132020	387370	0
P00414	P00414	1	1	1	Cytochrome c oxidase subunit 3	MT-CO3		1	1	1	1	1	1	1	1	0	0	1	1	1	1	0	0	1	1	1	1	0	0	5.4	5.4	5.4	29.95	261	261	1	4	0	2.5411	5.4	5.4	5.4	5.4	0	0	293590	100490	38499	92985
P08243;C9JLN6;C9JM09;C9JT45;C9J057;F8WEJ5	P08243;C9JLN6;C9JM09;C9JT45;C9J057;F8WEJ5	2;1;1;1;1;1	2;1;1;1;1;1	2;1;1;1;1;1	Asparagine synthetase [glutamine-hydrolyzing]	ASNS	;;;;;	6	2	2	2	1	0	1	0	0	2	1	0	1	0	0	2	1	0	1	0	0	2	4.1	4.1	4.1	64.369	561	561;63;118;162;214;401	1	4	0	3.2931	1.6	0	1.6	0	0	4.1	369910	76162	0	65307
X6R5C5;X6R8A1;P10619	X6R5C5;X6R8A1;P10619	2;2;2	2;2;2	2;2;2	Carboxypeptidase;Lysosomal protective protein;Lysosomal protective protein 32 kDa chain;Lysosomal protective protein 20 kDa chain	CTSA	;;	3	2	2	2	0	0	0	1	2	1	0	0	0	1	2	1	0	0	0	1	2	1	5	5	5	54.255	481	481;498;480	1	4	0	8.5965	0	0	0	2.7	5	2.7	2824100	0	0	0
P18031;B4DSN5	P18031;B4DSN5	3;2	3;2	3;2	Tyrosine-protein phosphatase non-receptor type 1;Tyrosine-protein phosphatase non-receptor type	PTPN1	;	2	3	3	3	2	0	1	1	0	0	2	0	1	1	0	0	2	0	1	1	0	0	7.4	7.4	7.4	49.966	435	435;362	1	4	0	5.4403	5.3	0	2.5	2.1	0	0	1584300	683110	0	260840
P32119	P32119	3	2	2	Peroxiredoxin-2	PRDX2		1	3	2	2	1	1	1	2	3	2	0	0	0	1	2	1	0	0	0	1	2	1	13.6	8.1	8.1	21.892	198	198	1	4	0	2.6317	5.6	5.6	5.6	9.6	13.6	9.6	1827100	0	0	0
P38432	P38432	2	2	2	Coilin	COIL		1	2	2	2	1	1	2	0	0	0	1	1	2	0	0	0	1	1	2	0	0	0	4.5	4.5	4.5	62.608	576	576	1	4	0	5.1918	1.7	1.7	4.5	0	0	0	1975600	622690	332160	1020800
P41250	P41250	2	2	2	Glycine--tRNA ligase	GARS		1	2	2	2	2	0	0	1	1	0	2	0	0	1	1	0	2	0	0	1	1	0	3.8	3.8	3.8	83.165	739	739	1	4	0.0040445	1.952	3.8	0	0	2.8	2.8	0	414140	184810	0	0
P46060;B0QYT5;B0QYT4	P46060	3;1;1	3;1;1	3;1;1	Ran GTPase-activating protein 1	RANGAP1		3	3	3	3	2	2	0	0	0	0	2	2	0	0	0	0	2	2	0	0	0	0	8.2	8.2	8.2	63.541	587	587;100;133	1	4	0	4.6253	4.3	6	0	0	0	0	2082100	1353800	728310	0
P60953;Q5JYX0	P60953;Q5JYX0	2;1	2;1	2;1	Cell division control protein 42 homolog	CDC42	;	2	2	2	2	1	0	0	1	1	1	1	0	0	1	1	1	1	0	0	1	1	1	15.7	15.7	15.7	21.258	191	191;136	1	4	0	3.234	8.9	0	0	8.9	6.8	8.9	597690	138770	0	0
Q13347	Q13347	1	1	1	Eukaryotic translation initiation factor 3 subunit I	EIF3I		1	1	1	1	1	1	1	0	1	0	1	1	1	0	1	0	1	1	1	0	1	0	3.7	3.7	3.7	36.501	325	325	1	4	0	2.45	3.7	3.7	3.7	0	3.7	0	1357100	394750	274520	390100
Q13395	Q13395	3	3	3	Probable methyltransferase TARBP1	TARBP1		1	3	3	3	1	3	3	1	1	1	1	3	3	1	1	1	1	3	3	1	1	1	2.2	2.2	2.2	181.67	1621	1621	1	11	0	6.5841	0.9	2.2	2.2	0.9	0.9	0.9	501410	0	210340	291070
Q13501;E7EMC7	Q13501;E7EMC7	2;1	2;1	2;1	Sequestosome-1	SQSTM1	;	2	2	2	2	1	2	1	0	0	0	1	2	1	0	0	0	1	2	1	0	0	0	8.2	8.2	8.2	47.687	440	440;378	1	4	0	3.3651	5	8.2	5	0	0	0	836970	131610	624820	80540
Q15008;C9J0E9;H7C531	Q15008;C9J0E9	3;2;1	3;2;1	3;2;1	26S proteasome non-ATPase regulatory subunit 6	PSMD6	;	3	3	3	3	0	3	1	0	0	0	0	3	1	0	0	0	0	3	1	0	0	0	9.5	9.5	9.5	45.531	389	389;226;138	1	4	0	3.3611	0	9.5	2.3	0	0	0	342780	0	294870	47916
Q15058	Q15058	2	2	2	Kinesin-like protein KIF14	KIF14		1	2	2	2	2	0	0	1	1	0	2	0	0	1	1	0	2	0	0	1	1	0	1.5	1.5	1.5	186.49	1648	1648	1	4	0	3.0296	1.5	0	0	0.7	0.7	0	21364000	9601400	0	0
Q5SNT2	Q5SNT2	1	1	1	Transmembrane protein 201	TMEM201		1	1	1	1	1	1	0	1	0	1	1	1	0	1	0	1	1	1	0	1	0	1	1.5	1.5	1.5	72.235	666	666	1	4	0	2.6426	1.5	1.5	0	1.5	0	1.5	489800	319740	170060	0
Q5TB53;Q9HD45	Q5TB53;Q9HD45	2;2	2;2	2;2	Transmembrane 9 superfamily member 3	TM9SF3	;	2	2	2	2	2	1	1	0	0	0	2	1	1	0	0	0	2	1	1	0	0	0	11.5	11.5	11.5	29.881	253	253;589	1	4	0	5.408	11.5	3.2	8.3	0	0	0	5371000	3200400	664830	1505800
Q68E01;A0A096LNW8	Q68E01;A0A096LNW8	2;1	2;1	2;1	Integrator complex subunit 3	INTS3	;	2	2	2	2	0	2	1	0	1	0	0	2	1	0	1	0	0	2	1	0	1	0	3.8	3.8	3.8	118.07	1043	1043;280	1	4	0	4.5088	0	3.8	1.6	0	1.6	0	308580	0	138480	71495
Q70CQ2	Q70CQ2	1	1	1	Ubiquitin carboxyl-terminal hydrolase 34	USP34		1	1	1	1	1	1	1	1	0	0	1	1	1	1	0	0	1	1	1	1	0	0	0.3	0.3	0.3	404.23	3546	3546	1	4	0	2.5657	0.3	0.3	0.3	0.3	0	0	132130	58018	32560	41555
Q7Z3U7;F8VZV1	Q7Z3U7;F8VZV1	2;1	2;1	2;1	Protein MON2 homolog	MON2	;	2	2	2	2	0	1	2	0	0	1	0	1	2	0	0	1	0	1	2	0	0	1	1.3	1.3	1.3	190.36	1717	1717;1072	1	4	0	4.4085	0	0.6	1.3	0	0	0.6	514610	0	221730	292870
Q8IUR0;M0QZQ8	Q8IUR0;M0QZQ8	2;1	2;1	2;1	Trafficking protein particle complex subunit 5	TRAPPC5	;	2	2	2	2	2	1	0	0	1	0	2	1	0	0	1	0	2	1	0	0	1	0	11.7	11.7	11.7	20.783	188	188;121	1	4	0	4.0741	11.7	4.8	0	0	6.9	0	662180	376440	236480	0
Q8N357	Q8N357	1	1	1	Solute carrier family 35 member F6	SLC35F6		1	1	1	1	1	1	1	0	0	0	1	1	1	0	0	0	1	1	1	0	0	0	3.2	3.2	3.2	40.214	371	371	1	4	0.0010718	2.2878	3.2	3.2	3.2	0	0	0	925500	611720	113010	200780
Q8N3E9	Q8N3E9	2	2	2	1-phosphatidylinositol 4,5-bisphosphate phosphodiesterase delta-3	PLCD3		1	2	2	2	1	1	1	0	0	0	1	1	1	0	0	0	1	1	1	0	0	0	4.9	4.9	4.9	89.257	789	789	1	3	0	3.2145	2	2.9	2.9	0	0	0	858020	647670	109700	100640
X6R5E5;Q8NBM4	X6R5E5;Q8NBM4	3;3	3;3	3;3	Ubiquitin-associated domain-containing protein 2	UBAC2	;	2	3	3	3	1	0	0	1	0	2	1	0	0	1	0	2	1	0	0	1	0	2	18.6	18.6	18.6	23.074	204	204;344	1	4	0	4.203	5.9	0	0	8.8	0	12.7	2571200	1172300	0	0
Q8NBU5	Q8NBU5	1	1	1	ATPase family AAA domain-containing protein 1	ATAD1		1	1	1	1	1	0	1	1	1	0	1	0	1	1	1	0	1	0	1	1	1	0	4.4	4.4	4.4	40.744	361	361	1	4	0.0031088	2.059	4.4	0	4.4	4.4	4.4	0	225060	83892	0	57670
S4R468;Q8NE86	S4R468;Q8NE86	1;1	1;1	1;1	Calcium uniporter protein, mitochondrial	MCU	;	2	1	1	1	1	1	1	1	0	0	1	1	1	1	0	0	1	1	1	1	0	0	9.6	9.6	9.6	18.97	167	167;351	1	4	0	3.0023	9.6	9.6	9.6	9.6	0	0	732290	206860	191020	179110
Q96EY7	Q96EY7	1	1	1	Pentatricopeptide repeat domain-containing protein 3, mitochondrial	PTCD3		1	1	1	1	1	1	0	1	1	0	1	1	0	1	1	0	1	1	0	1	1	0	2.2	2.2	2.2	78.549	689	689	1	4	0	2.8555	2.2	2.2	0	2.2	2.2	0	156050	51309	20841	0
Q96P11	Q96P11	2	2	2	Probable 28S rRNA (cytosine-C(5))-methyltransferase	NSUN5		1	2	2	2	0	0	1	2	1	0	0	0	1	2	1	0	0	0	1	2	1	0	6.1	6.1	6.1	46.691	429	429	1	4	0	4.672	0	0	2.3	6.1	3.7	0	177860	0	0	73048
Q9BPX3;H0Y9Z8	Q9BPX3	4;1	4;1	4;1	Condensin complex subunit 3	NCAPG		2	4	4	4	1	0	2	1	0	0	1	0	2	1	0	0	1	0	2	1	0	0	5.3	5.3	5.3	114.33	1015	1015;269	1	4	0	8.7222	1.4	0	2.4	1.6	0	0	767800	370260	0	384150
Q9BU76	Q9BU76	3	3	3	Multiple myeloma tumor-associated protein 2	MMTAG2		1	3	3	3	3	1	1	0	0	0	3	1	1	0	0	0	3	1	1	0	0	0	15.2	15.2	15.2	29.411	263	263	1	5	0	4.9133	15.2	3.8	3.8	0	0	0	1638500	714510	394530	529450
Q9BW72	Q9BW72	1	1	1	HIG1 domain family member 2A, mitochondrial	HIGD2A		1	1	1	1	0	0	0	1	1	1	0	0	0	1	1	1	0	0	0	1	1	1	19.8	19.8	19.8	11.528	106	106	1	4	0.0086207	1.7231	0	0	0	19.8	19.8	19.8	165920	0	0	0
Q9BW92;U3KQG0;Q5T5E9;U3KQ50;F6S7Q7	Q9BW92;U3KQG0	3;2;1;1;1	3;2;1;1;1	3;2;1;1;1	Threonine--tRNA ligase, mitochondrial	TARS2	;	5	3	3	3	0	1	1	0	0	2	0	1	1	0	0	2	0	1	1	0	0	2	4.3	4.3	4.3	81.035	718	718;636;135;143;443	1	4	0	8.8116	0	1.8	1.4	0	0	2.9	418500	0	129350	0
Q9HCM4;Q9H329	Q9HCM4;Q9H329	1;1	1;1	1;1	Band 4.1-like protein 5;Band 4.1-like protein 4B	EPB41L5;EPB41L4B	;	2	1	1	1	1	0	0	1	1	1	1	0	0	1	1	1	1	0	0	1	1	1	1.1	1.1	1.1	81.855	733	733;900	1	4	0.0058939	1.8487	1.1	0	0	1.1	1.1	1.1	1001000	196350	0	0
Q9NVN8	Q9NVN8	4	4	4	Guanine nucleotide-binding protein-like 3-like protein	GNL3L		1	4	4	4	0	0	0	1	2	1	0	0	0	1	2	1	0	0	0	1	2	1	8.4	8.4	8.4	65.572	582	582	1	4	0	5.1612	0	0	0	1.9	4.1	2.4	1704100	0	0	0
Q9NXS2	Q9NXS2	2	2	2	Glutaminyl-peptide cyclotransferase-like protein	QPCTL		1	2	2	2	1	1	0	1	1	0	1	1	0	1	1	0	1	1	0	1	1	0	15.2	15.2	15.2	42.924	382	382	1	4	0	6.3734	6.3	6.3	0	6.3	8.9	0	437150	69559	54710	0
Q9NY12	Q9NY12	2	2	2	H/ACA ribonucleoprotein complex subunit 1	GAR1		1	2	2	2	2	0	2	0	0	0	2	0	2	0	0	0	2	0	2	0	0	0	6.5	6.5	6.5	22.348	217	217	1	4	0.0040733	1.9707	6.5	0	6.5	0	0	0	1247300	669520	0	577760
Q9P0J7	Q9P0J7	2	2	2	E3 ubiquitin-protein ligase KCMF1	KCMF1		1	2	2	2	1	1	1	0	0	0	1	1	1	0	0	0	1	1	1	0	0	0	8.1	8.1	8.1	41.945	381	381	1	3	0	7.7028	4.5	3.7	3.7	0	0	0	162660	104270	28200	30192
Q9P0U1;B5MD00;A0A087WZY2;A6NIV2	Q9P0U1;B5MD00;A0A087WZY2;A6NIV2	2;1;1;1	2;1;1;1	2;1;1;1	Mitochondrial import receptor subunit TOM7 homolog	TOMM7	;;;	4	2	2	2	1	0	0	2	0	0	1	0	0	2	0	0	1	0	0	2	0	0	56.4	56.4	56.4	6.2484	55	55;51;55;125	1	3	0.0010661	2.2349	30.9	0	0	56.4	0	0	729160	327990	0	0
Q9UJX3	Q9UJX3	1	1	1	Anaphase-promoting complex subunit 7	ANAPC7		1	1	1	1	1	1	1	0	0	1	1	1	1	0	0	1	1	1	1	0	0	1	2.5	2.5	2.5	66.855	599	599	1	4	0	3.3725	2.5	2.5	2.5	0	0	2.5	320350	100470	93427	68903
Q9UK61;A0A087X0F1	Q9UK61;A0A087X0F1	2;1	2;1	2;1	Protein FAM208A	FAM208A	;	2	2	2	2	0	0	0	1	2	1	0	0	0	1	2	1	0	0	0	1	2	1	1.5	1.5	1.5	189.03	1670	1670;1035	1	4	0	6.2211	0	0	0	0.8	1.5	0.8	569250	0	0	0
Q9UKA4	Q9UKA4	2	2	2	A-kinase anchor protein 11	AKAP11		1	2	2	2	2	1	1	0	0	0	2	1	1	0	0	0	2	1	1	0	0	0	2.4	2.4	2.4	210.51	1901	1901	1	4	0.0031283	2.076	2.4	1	1	0	0	0	175580	106220	37036	32331
Q9Y3I0	Q9Y3I0	3	3	3	tRNA-splicing ligase RtcB homolog	RTCB		1	3	3	3	0	0	0	1	1	2	0	0	0	1	1	2	0	0	0	1	1	2	6.1	6.1	6.1	55.21	505	505	1	4	0	6.0308	0	0	0	2.2	2.6	3.6	2266600	0	0	0
Q9Y3T9	Q9Y3T9	2	2	2	Nucleolar complex protein 2 homolog	NOC2L		1	2	2	2	1	1	2	0	0	0	1	1	2	0	0	0	1	1	2	0	0	0	2.9	2.9	2.9	84.918	749	749	1	4	0.0040486	1.9523	1.3	1.3	2.9	0	0	0	4769100	2173600	952400	1643100
A0A087WTA5;E7ERK9;Q9UI10	A0A087WTA5;E7ERK9;Q9UI10	2;2;2	2;2;2	2;2;2	Translation initiation factor eIF-2B subunit delta	EIF2B4	;;	3	2	2	2	0	0	0	0	1	2	0	0	0	0	1	2	0	0	0	0	1	2	6.9	6.9	6.9	57.495	520	520;544;523	1	3	0.0031185	2.0722	0	0	0	0	5	6.9	2250800	0	0	0
M0R202;A0A087WUM8;Q9NWS9;A0A0B4J2G2	M0R202;A0A087WUM8;Q9NWS9;A0A0B4J2G2	2;2;2;1	2;2;2;1	2;2;2;1	Zinc finger protein 446	ZNF446	;;;	4	2	2	2	0	0	0	2	1	0	0	0	0	2	1	0	0	0	0	2	1	0	6	6	6	44.094	399	399;422;450;422	1	3	0.009434	1.657	0	0	0	6	2.5	0	2159900	0	0	0
A0A087WUT6;O60841	A0A087WUT6;O60841	2;2	2;2	2;2	Eukaryotic translation initiation factor 5B	EIF5B	;	2	2	2	2	0	0	1	1	1	0	0	0	1	1	1	0	0	0	1	1	1	0	2.9	2.9	2.9	138.68	1220	1220;1220	1	3	0	2.6935	0	0	1.6	1.3	1.3	0	409400	0	0	202920
F8WE98;A0A087WWY3;Q5HY54;Q60FE5;O75369;P21333;Q14315	F8WE98;A0A087WWY3;Q5HY54;Q60FE5;O75369;P21333;Q14315	2;2;2;2;2;2;2	2;2;2;2;2;2;2	2;2;2;2;2;2;2	Filamin-B;Filamin-A;Filamin-C	FLNA;FLNB;FLNC	;;;;;;	7	2	2	2	0	1	2	0	0	0	0	1	2	0	0	0	0	1	2	0	0	0	3.1	3.1	3.1	66.591	604	604;2315;2607;2620;2602;2647;2725	1	3	0	5.3998	0	1.8	3.1	0	0	0	810650	0	274400	536250
H0Y8X1;A0A087X1I3;D6RFM5;P31040	H0Y8X1;A0A087X1I3;D6RFM5;P31040	1;1;1;1	1;1;1;1	1;1;1;1	Succinate dehydrogenase [ubiquinone] flavoprotein subunit, mitochondrial	SDHA	;;;	4	1	1	1	0	0	0	1	1	1	0	0	0	1	1	1	0	0	0	1	1	1	11.1	11.1	11.1	13.525	126	126;519;583;664	1	3	0	2.9604	0	0	0	11.1	11.1	11.1	340770	0	0	0
A0A0G2JSB3;I3L1D4;B0QYY7;A0A0G2JRD1;S4R3K7;S4R469;F8VR27;F8VZY7;B0QYV1;B0QYY4;A0A087X2B1;A0A0G2JRA5;J3KNW3;B7Z1U7;F8VZG9;O43251;Q9NWB1	A0A0G2JSB3;I3L1D4;B0QYY7;A0A0G2JRD1;S4R3K7;S4R469;F8VR27;F8VZY7;B0QYV1;B0QYY4;A0A087X2B1;A0A0G2JRA5;J3KNW3;B7Z1U7;F8VZG9;O43251;Q9NWB1	1;1;1;1;1;1;1;1;1;1;1;1;1;1;1;1;1	1;1;1;1;1;1;1;1;1;1;1;1;1;1;1;1;1	1;1;1;1;1;1;1;1;1;1;1;1;1;1;1;1;1	RNA binding protein fox-1 homolog;RNA binding protein fox-1 homolog 2;RNA binding protein fox-1 homolog 1	RBFOX1;RBFOX2	;;;;;;;;;;;;;;;;	17	1	1	1	1	0	1	1	0	0	1	0	1	1	0	0	1	0	1	1	0	0	8.1	8.1	8.1	20.252	186	186;189;200;227;230;234;262;263;357;370;375;389;402;425;466;390;397	1	3	0	2.8443	8.1	0	8.1	8.1	0	0	2064800	834390	0	574630
A0A087X2C3;Q9Y3L5	A0A087X2C3;Q9Y3L5	1;1	1;1	1;1	Ras-related protein Rap-2c	RAP2C	;	2	1	1	1	0	0	0	1	1	1	0	0	0	1	1	1	0	0	0	1	1	1	7.7	7.7	7.7	13.512	117	117;183	1	3	0.0010638	2.2325	0	0	0	7.7	7.7	7.7	2373100	0	0	0
A0A087X2I1;P62333	A0A087X2I1;P62333	1;1	1;1	1;1	26S protease regulatory subunit 10B	PSMC6	;	2	1	1	1	1	0	1	1	0	0	1	0	1	1	0	0	1	0	1	1	0	0	4.2	4.2	4.2	45.796	403	403;389	1	3	0.0059172	1.8574	4.2	0	4.2	4.2	0	0	840420	288370	0	252390
Q5T092;A0A0A0MR06;Q5T091;O15258	Q5T092;A0A0A0MR06;Q5T091;O15258	1;1;1;1	1;1;1;1	1;1;1;1	Protein RER1	RER1	;;;	4	1	1	1	1	1	1	0	0	0	1	1	1	0	0	0	1	1	1	0	0	0	11.4	11.4	11.4	18.388	158	158;177;187;196	1	3	0	2.9269	11.4	11.4	11.4	0	0	0	2304400	902290	694340	707810
A0A0A0MRJ0;Q5VT25;H0Y6V3;H0Y7V8;A0A0A0MRJ1;H0Y5V1;H0YLY0;Q9Y5S2	A0A0A0MRJ0;Q5VT25;H0Y6V3;H0Y7V8;A0A0A0MRJ1;H0Y5V1	3;3;2;2;2;2;1;1	3;3;2;2;2;2;1;1	3;3;2;2;2;2;1;1	Non-specific serine/threonine protein kinase;Serine/threonine-protein kinase MRCK alpha	CDC42BPA	;;;;;	8	3	3	3	2	0	1	0	0	0	2	0	1	0	0	0	2	0	1	0	0	0	2.1	2.1	2.1	193.63	1699	1699;1732;728;984;1018;1048;666;1711	1	3	0	5.0038	1.3	0	0.8	0	0	0	1566700	900480	0	666190
A0A0A0MS24;O60237;E1CKY7;H7C4R6	A0A0A0MS24;O60237;E1CKY7	3;3;2;1	2;2;1;1	2;2;1;1	Protein phosphatase 1 regulatory subunit 12B	PPP1R12B;sm-M20	;;	4	3	2	2	2	2	1	0	0	0	1	1	0	0	0	0	1	1	0	0	0	0	4.7	3.7	3.7	116.5	1043	1043;982;186;212	1	2	0	4.3027	2.6	3.1	1	0	0	0	687080	443400	243680	0
A0A0A0MS41;Q9BWM7;S4R3N9	A0A0A0MS41;Q9BWM7;S4R3N9	2;2;1	1;1;1	1;1;1	Sideroflexin;Sideroflexin-3	SFXN3	;;	3	2	1	1	1	2	1	0	0	0	1	1	1	0	0	0	1	1	1	0	0	0	8.7	2.8	2.8	35.503	321	321;325;177	1	3	0.0041026	1.9953	2.8	8.7	2.8	0	0	0	10650000	4636600	2950900	3062900
A0A0A0MS51;A0A0A0MT01;CON__Q3SX14;P06396	A0A0A0MS51;A0A0A0MT01;CON__Q3SX14;P06396	1;1;1;1	1;1;1;1	1;1;1;1	Gelsolin	GSN	;;;	4	1	1	1	1	1	1	0	0	0	1	1	1	0	0	0	1	1	1	0	0	0	2	2	2	82.525	748	748;767;781;782	1	3	0	6.0253	2	2	2	0	0	0	1345000	656950	295510	392590
Q8WU40;Q5SWX3;A0A0A0MS52;A0A0A0MT11;Q13555;H0Y6G2;Q13554;H7C394	Q8WU40;Q5SWX3;A0A0A0MS52;A0A0A0MT11;Q13555;H0Y6G2;Q13554	4;4;4;4;4;3;3;1	2;2;2;2;2;2;1;1	2;2;2;2;2;2;1;1	Calcium/calmodulin-dependent protein kinase type II subunit gamma;Calcium/calmodulin-dependent protein kinase type II subunit beta	CAMK2G;CAMK2B	;;;;;;	8	4	2	2	1	1	1	1	1	2	0	1	1	0	0	1	0	1	1	0	0	1	15.9	5.1	5.1	50.924	453	453;516;539;558;558;335;666;184	1	3	0	3.7902	4.2	2.4	2.4	6.6	6.6	9.3	994270	0	348480	482680
A0A0A0MTI6;Q9NYP7	A0A0A0MTI6;Q9NYP7	1;1	1;1	1;1	Elongation of very long chain fatty acids protein;Elongation of very long chain fatty acids protein 5	ELOVL5	;	2	1	1	1	0	0	0	1	1	1	0	0	0	1	1	1	0	0	0	1	1	1	5	5	5	30.742	262	262;299	1	3	0	3.0608	0	0	0	5	5	5	2138700	0	0	0
F8VV32;A0A0B4J259;P61626	F8VV32;A0A0B4J259;P61626	1;1;1	1;1;1	1;1;1	Lysozyme;Lysozyme C	LYZ	;;	3	1	1	1	0	0	0	1	1	1	0	0	0	1	1	1	0	0	0	1	1	1	11.5	11.5	11.5	11.488	104	104;137;148	1	3	0	7.3706	0	0	0	11.5	11.5	11.5	1943000	0	0	0
H3BPG2;H3BQF2;A0A0B4J287;H3BM91;Q9H0A8	H3BPG2;H3BQF2;A0A0B4J287;H3BM91;Q9H0A8	1;1;1;1;1	1;1;1;1;1	1;1;1;1;1	COMM domain-containing protein 4	COMMD4	;;;;	5	1	1	1	0	1	0	1	1	0	0	1	0	1	1	0	0	1	0	1	1	0	11	11	11	14.584	136	136;146;177;211;199	1	3	0	3.0685	0	11	0	11	11	0	143150	0	39536	0
C9JUG7;F8W9N7;A0A0D9SET8;P47755	C9JUG7;F8W9N7;A0A0D9SET8;P47755	2;2;2;2	1;1;1;1	1;1;1;1	F-actin-capping protein subunit alpha-2	CAPZA2	;;;	4	2	1	1	2	2	2	0	0	0	1	1	1	0	0	0	1	1	1	0	0	0	19.2	12.3	12.3	16.698	146	146;174;174;286	1	3	0.0067308	1.7522	19.2	19.2	19.2	0	0	0	2735900	1069400	622030	1044400
A0A0D9SF54;A0A0D9SGF6;Q13813	A0A0D9SF54;A0A0D9SGF6;Q13813	1;1;1	1;1;1	1;1;1	Spectrin alpha chain, non-erythrocytic 1	SPTAN1	;;	3	1	1	1	1	1	1	0	0	0	1	1	1	0	0	0	1	1	1	0	0	0	0.8	0.8	0.8	282.83	2457	2457;2498;2472	1	3	0.0040858	1.9853	0.8	0.8	0.8	0	0	0	849830	312860	237570	299400
H0YA26;A0A0G2JR38;E9PHT6;Q9NVE7	H0YA26;A0A0G2JR38;E9PHT6;Q9NVE7	1;1;1;1	1;1;1;1	1;1;1;1	Pantothenate kinase 4	PANK4	;;;	4	1	1	1	1	1	1	0	0	0	1	1	1	0	0	0	1	1	1	0	0	0	3	3	3	52.963	473	473;734;737;773	1	3	0.0040323	1.9422	3	3	3	0	0	0	510400	238650	132650	139090
A0A0U1RQT9;C9JYN0;Q16563	A0A0U1RQT9;C9JYN0;Q16563	1;1;1	1;1;1	1;1;1	Synaptophysin-like protein 1	SYPL1	;;	3	1	1	1	1	1	1	0	0	0	1	1	1	0	0	0	1	1	1	0	0	0	8.1	8.1	8.1	14.967	135	135;224;259	1	3	0	4.0845	8.1	8.1	8.1	0	0	0	1688100	734930	455200	497930
F8W6W0;A1L170	F8W6W0;A1L170	1;1	1;1	1;1	Uncharacterized protein C1orf226	C1orf226	;	2	1	1	1	0	0	0	1	1	1	0	0	0	1	1	1	0	0	0	1	1	1	5.3	5.3	5.3	18.016	171	171;272	1	3	0	2.6926	0	0	0	5.3	5.3	5.3	4334300	0	0	0
B1AHD1;P55769	B1AHD1;P55769	1;1	1;1	1;1	NHP2-like protein 1;NHP2-like protein 1, N-terminally processed	NHP2L1	;	2	1	1	1	1	1	1	0	0	0	1	1	1	0	0	0	1	1	1	0	0	0	9.1	9.1	9.1	14.627	132	132;128	1	3	0.004008	1.9215	9.1	9.1	9.1	0	0	0	6922400	3223300	1800100	1899000
B1AMB1;B1AMB2;Q9BPZ7	B1AMB1;B1AMB2;Q9BPZ7	1;1;1	1;1;1	1;1;1	Target of rapamycin complex 2 subunit MAPKAP1	MAPKAP1	;;	3	1	1	1	0	0	0	1	1	1	0	0	0	1	1	1	0	0	0	1	1	1	15.1	15.1	15.1	10.36	93	93;132;522	1	3	0	9.547	0	0	0	15.1	15.1	15.1	658940	0	0	0
B1AMV7;B1AMV8	B1AMV7	4;1	1;1	1;1		SFXN4		2	4	1	1	4	3	3	3	1	3	1	0	1	1	0	0	1	0	1	1	0	0	36.5	7.3	7.3	19.652	178	178;62	1	3	0.0020986	2.1291	36.5	29.2	25.8	31.5	13.5	29.2	4496700	1894700	0	1288800
H3BMM1;H3BRD5;B2RTY4	H3BMM1;H3BRD5;B2RTY4	3;3;3	3;3;3	3;3;3	Unconventional myosin-IXa	MYO9A	;;	3	3	3	3	0	0	0	1	1	1	0	0	0	1	1	1	0	0	0	1	1	1	2.5	2.5	2.5	150.17	1301	1301;2396;2548	1	3	0	2.746	0	0	0	1.2	0.6	0.6	1010000	0	0	0
C9JEY0;C9JE81;B5MD38;F5GZQ3;P55084	C9JEY0;C9JE81;B5MD38;F5GZQ3;P55084	1;1;1;1;1	1;1;1;1;1	1;1;1;1;1	Trifunctional enzyme subunit beta, mitochondrial;3-ketoacyl-CoA thiolase	HADHB	;;;;	5	1	1	1	1	0	1	1	0	0	1	0	1	1	0	0	1	0	1	1	0	0	10.7	10.7	10.7	16.072	149	149;175;351;459;474	1	3	0	2.5652	10.7	0	10.7	10.7	0	0	401280	255150	0	80250
F8VR50;C9JZD1;O15145	F8VR50;C9JZD1;O15145	1;1;1	1;1;1	1;1;1	Actin-related protein 2/3 complex subunit 3	ARPC3	;;	3	1	1	1	1	1	1	0	0	0	1	1	1	0	0	0	1	1	1	0	0	0	13.1	13.1	13.1	9.7261	84	84;99;178	1	3	0	4.1403	13.1	13.1	13.1	0	0	0	2245000	947070	580520	717440
F8WF65;F2Z2G2;C9JZW3;P24534	F8WF65;F2Z2G2;C9JZW3;P24534	1;1;1;1	1;1;1;1	1;1;1;1	Elongation factor 1-beta	EEF1B2	;;;	4	1	1	1	1	1	1	0	0	0	1	1	1	0	0	0	1	1	1	0	0	0	51.7	51.7	51.7	3.1045	29	29;68;123;225	1	3	0	6.6238	51.7	51.7	51.7	0	0	0	1469000	594300	437740	436970
CON__Q32MB2;Q86Y46;CON__Q7RTS7;F8W1S1;Q7RTS7;H0YIC5;CON__Q3SY84;Q3SY84	CON__Q32MB2;Q86Y46;CON__Q7RTS7;F8W1S1;Q7RTS7;H0YIC5;CON__Q3SY84;Q3SY84	6;6;5;5;5;4;4;4	1;1;1;1;1;0;1;1	0;0;0;0;0;0;0;0	Keratin, type II cytoskeletal 73;Keratin, type II cytoskeletal 74;Keratin, type II cytoskeletal 71	KRT73;KRT74;KRT71	;;;;;;;	8	6	1	0	3	4	3	4	6	6	0	0	0	0	1	1	0	0	0	0	0	0	9.4	2.2	0	58.923	540	540;540;529;543;529;285;523;523	1	3	0	9.842	5.7	5.7	3.5	5	9.4	9.4	0	0	0	0
Q5TCU3;CON__Q3SX28;Q5TCU8;P07951;K7ERG3;K7ENT6;U3KQK2;K7EPV9	Q5TCU3;CON__Q3SX28;Q5TCU8;P07951;K7ERG3;K7ENT6	10;10;10;10;7;7;3;2	1;1;1;1;0;0;0;0	1;1;1;1;0;0;0;0	Tropomyosin beta chain	TPM2;TPM4	;;;;;	8	10	1	1	10	10	10	0	0	1	1	1	1	0	0	0	1	1	1	0	0	0	25	3.2	3.2	32.814	284	284;284;322;284;170;179;111;96	1	3	0	2.3357	25	25	25	0	0	3.5	12190000	5269900	3612100	3307800
E5RFM2;E5RK82;E5RJF8;O15182;H0YBL5;E5RH67	E5RFM2;E5RK82;E5RJF8;O15182;H0YBL5;E5RH67	2;2;2;2;1;1	2;2;2;2;1;1	2;2;2;2;1;1	Centrin-3	CETN3	;;;;;	6	2	2	2	2	1	0	0	0	0	2	1	0	0	0	0	2	1	0	0	0	0	23.5	23.5	23.5	18.047	153	153;156;191;167;81;111	1	3	0	3.6262	23.5	7.2	0	0	0	0	722570	603640	118930	0
E5RFR9;Q00005;P63151;Q66LE6	E5RFR9;Q00005;P63151;Q66LE6	1;1;1;1	1;1;1;1	1;1;1;1	Serine/threonine-protein phosphatase 2A 55 kDa regulatory subunit B beta isoform;Serine/threonine-protein phosphatase 2A 55 kDa regulatory subunit B alpha isoform;Serine/threonine-protein phosphatase 2A 55 kDa regulatory subunit B delta isoform	PPP2R2A;PPP2R2B;PPP2R2D	;;;	4	1	1	1	1	1	1	0	0	0	1	1	1	0	0	0	1	1	1	0	0	0	7.1	7.1	7.1	23.007	197	197;443;447;453	1	3	0	3.7271	7.1	7.1	7.1	0	0	0	138050	90912	47136	0
E5RIF2;Q9Y6D6	E5RIF2;Q9Y6D6	3;3	3;3	2;2	Brefeldin A-inhibited guanine nucleotide-exchange protein 1	ARFGEF1	;	2	3	3	2	1	1	1	0	0	0	1	1	1	0	0	0	0	1	1	0	0	0	3.1	3.1	2.3	145.49	1279	1279;1849	1	3	0	4.8138	0.9	1.3	0.9	0	0	0	873450	674520	42073	156860
E7EQB2;E7ER44;P02788	E7EQB2;E7ER44;P02788	3;3;3	3;3;3	3;3;3	Lactotransferrin;Lactoferricin-H;Kaliocin-1;Lactoferroxin-A;Lactoferroxin-B;Lactoferroxin-C	LTF	;;	3	3	3	3	1	2	0	0	0	0	1	2	0	0	0	0	1	2	0	0	0	0	6.6	6.6	6.6	76.625	696	696;708;710	1	3	0	7.1471	1.3	5.3	0	0	0	0	713040	350220	362810	0
E7EUL7;E9PHV5;P28290	E7EUL7;E9PHV5;P28290	2;2;2	2;2;2	2;2;2	Sperm-specific antigen 2	SSFA2	;;	3	2	2	2	2	0	1	0	0	0	2	0	1	0	0	0	2	0	1	0	0	0	3	3	3	84.592	768	768;1237;1259	1	3	0	2.7174	3	0	1.4	0	0	0	215050	215050	0	0
E9PFK5;P78316	E9PFK5;P78316	2;2	2;2	2;2	Nucleolar protein 14	NOP14	;	2	2	2	2	2	1	0	0	0	0	2	1	0	0	0	0	2	1	0	0	0	0	2.8	2.8	2.8	88.865	788	788;857	1	3	0	4.1215	2.8	1.1	0	0	0	0	473860	473860	0	0
E9PM04;H0YCN4;Q9BTE7	E9PM04;H0YCN4;Q9BTE7	1;1;1	1;1;1	1;1;1	DCN1-like protein;DCN1-like protein 5	DCUN1D5	;;	3	1	1	1	0	1	0	1	0	1	0	1	0	1	0	1	0	1	0	1	0	1	5.9	5.9	5.9	17.855	152	152;195;237	1	3	0	2.3313	0	5.9	0	5.9	0	5.9	301530	0	133360	0
F5H867;F5H0E2;H0YFS2;F5GZS6;J3KPF3;P08195	F5H867;F5H0E2;H0YFS2;F5GZS6;J3KPF3;P08195	1;1;1;1;1;1	1;1;1;1;1;1	1;1;1;1;1;1	4F2 cell-surface antigen heavy chain	SLC3A2	;;;;;	6	1	1	1	1	1	1	0	0	0	1	1	1	0	0	0	1	1	1	0	0	0	9.6	9.6	9.6	14.757	135	135;145;247;599;631;630	1	3	0	3.7391	9.6	9.6	9.6	0	0	0	1575500	689980	476290	409220
F5H3S5;F5H0F9;Q9UJX4	F5H3S5;F5H0F9;Q9UJX4	1;1;1	1;1;1	1;1;1	Anaphase-promoting complex subunit 5	ANAPC5	;;	3	1	1	1	1	1	1	0	0	0	1	1	1	0	0	0	1	1	1	0	0	0	5.6	5.6	5.6	24.778	216	216;742;755	1	3	0.0010593	2.2084	5.6	5.6	5.6	0	0	0	420030	164340	123410	132280
F5H2F4;P11586	F5H2F4;P11586	3;3	3;3	3;3	C-1-tetrahydrofolate synthase, cytoplasmic;Methylenetetrahydrofolate dehydrogenase;Methenyltetrahydrofolate cyclohydrolase;Formyltetrahydrofolate synthetase;C-1-tetrahydrofolate synthase, cytoplasmic, N-terminally processed	MTHFD1	;	2	3	3	3	0	2	0	1	0	0	0	2	0	1	0	0	0	2	0	1	0	0	2.6	2.6	2.6	110.61	1020	1020;935	1	3	0	4.1108	0	1.7	0	1	0	0	1123800	0	714750	0
F8W1R7;G3V1V0;P60660;J3KND3;B7Z6Z4;G3V1Y7;F8VPF3;H0YI43	F8W1R7;G3V1V0;P60660;J3KND3;B7Z6Z4;G3V1Y7;F8VPF3	8;8;8;7;7;6;6;2	1;1;1;0;0;1;0;0	1;1;1;0;0;1;0;0	Myosin light polypeptide 6	MYL6	;;;;;;	8	8	1	1	8	8	8	4	5	5	1	1	1	0	0	0	1	1	1	0	0	0	57.9	8.3	8.3	16.29	145	145;161;151;152;238;115;130;83	1	3	0	3.1813	57.9	57.9	57.9	35.9	42.1	42.1	15721000	7317600	4132300	4271500
G3V0I5;P49821;E9PPS5;H0YD04;E9PPR0;E9PQP1;E9PMX3;B4DE93	G3V0I5;P49821;E9PPS5;H0YD04;E9PPR0;E9PQP1;E9PMX3;B4DE93	2;2;1;1;1;1;1;1	2;2;1;1;1;1;1;1	2;2;1;1;1;1;1;1	NADH dehydrogenase [ubiquinone] flavoprotein 1, mitochondrial	NDUFV1	;;;;;;;	8	2	2	2	1	0	2	0	0	0	1	0	2	0	0	0	1	0	2	0	0	0	8.1	8.1	8.1	50.054	457	457;464;75;127;144;178;178;363	1	3	0	2.9385	2.2	0	8.1	0	0	0	1443800	623220	0	820560
H0YJ63;G3V438;H0YJG7;O95433	H0YJ63;G3V438;H0YJG7;O95433	1;1;1;1	1;1;1;1	1;1;1;1	Activator of 90 kDa heat shock protein ATPase homolog 1	AHSA1	;;;	4	1	1	1	0	1	1	0	0	1	0	1	1	0	0	1	0	1	1	0	0	1	24.4	24.4	24.4	10.031	90	90;203;216;338	1	3	0.0094518	1.6641	0	24.4	24.4	0	0	24.4	979500	0	388230	346740
H0Y465;P21359;J3QSG6;J3KSB5	H0Y465;P21359	4;4;1;1	4;4;1;1	4;4;1;1	Neurofibromin;Neurofibromin truncated	NF1	;	4	4	4	4	2	0	1	0	0	1	2	0	1	0	0	1	2	0	1	0	0	1	2.7	2.7	2.7	281.21	2502	2502;2839;640;1656	1	4	0	5.2344	1.6	0	0.5	0	0	0.6	324740	92915	0	214300
H0YDA1;P52948	H0YDA1;P52948	1;1	1;1	1;1	Nuclear pore complex protein Nup98-Nup96;Nuclear pore complex protein Nup98;Nuclear pore complex protein Nup96	NUP98	;	2	1	1	1	1	0	1	0	1	0	1	0	1	0	1	0	1	0	1	0	1	0	14.7	14.7	14.7	8.2293	75	75;1817	1	3	0	2.6523	14.7	0	14.7	0	14.7	0	221370	123180	0	98190
H0YHZ5;Q9UHW5	H0YHZ5;Q9UHW5	1;1	1;1	1;1	GPN-loop GTPase 3	GPN3	;	2	1	1	1	0	1	1	1	0	0	0	1	1	1	0	0	0	1	1	1	0	0	15	15	15	13.844	120	120;284	1	3	0	7.2215	0	15	15	15	0	0	323220	0	153080	170140
H0YLS6;H0YLC2;H0YKT8;H0YMI6;H0YMA1;H0YMZ1;H0YN18;H0YL69;P25789	H0YLS6;H0YLC2;H0YKT8;H0YMI6;H0YMA1;H0YMZ1;H0YN18;H0YL69;P25789	1;1;1;1;1;1;1;1;1	1;1;1;1;1;1;1;1;1	1;1;1;1;1;1;1;1;1	Proteasome subunit alpha type;Proteasome subunit beta type;Proteasome subunit alpha type-4	PSMA4	;;;;;;;;	9	1	1	1	1	1	1	0	0	0	1	1	1	0	0	0	1	1	1	0	0	0	8	8	8	13.948	125	125;174;181;183;209;220;230;236;261	1	3	0	2.6156	8	8	8	0	0	0	791450	0	435150	356310
H3BMQ0;P49815	H3BMQ0;P49815	3;3	3;3	3;3	Tuberin	TSC2	;	2	3	3	3	1	0	1	0	1	0	1	0	1	0	1	0	1	0	1	0	1	0	1.7	1.7	1.7	194.39	1751	1751;1807	1	3	0	3.4571	0.6	0	0.4	0	0.6	0	807550	112080	0	677540
H3BQZ9;P07741;H3BSW3;H3BQF1;H3BQB1	H3BQZ9;P07741;H3BSW3;H3BQF1;H3BQB1	2;2;1;1;1	2;2;1;1;1	2;2;1;1;1	Adenine phosphoribosyltransferase	APRT	;;;;	5	2	2	2	1	0	0	1	1	0	1	0	0	1	1	0	1	0	0	1	1	0	17	17	17	16.616	153	153;180;63;148;162	1	3	0	3.0919	8.5	0	0	8.5	8.5	0	139700	74318	0	0
H3BS03;O15360	H3BS03;O15360	1;1	1;1	1;1	Fanconi anemia group A protein	FANCA	;	2	1	1	1	1	1	1	0	0	0	1	1	1	0	0	0	1	1	1	0	0	0	5.9	5.9	5.9	17.221	153	153;1455	1	3	0	2.5894	5.9	5.9	5.9	0	0	0	141390	69876	30844	40674
H7BXY3;Q7L2E3	H7BXY3;Q7L2E3	1;1	1;1	1;1	Putative ATP-dependent RNA helicase DHX30	DHX30	;	2	1	1	1	1	1	1	0	0	0	1	1	1	0	0	0	1	1	1	0	0	0	1.5	1.5	1.5	130.55	1166	1166;1194	1	3	0	2.4207	1.5	1.5	1.5	0	0	0	174140	61446	56651	56047
H7C1M2	H7C1M2	9	1	1		SON		1	9	1	1	7	5	5	1	1	1	1	1	1	0	0	0	1	1	1	0	0	0	10.6	1.1	1.1	159.91	1454	1454	1	3	0	2.7021	7.7	6.7	6.2	1.2	1.2	1.9	455710	162170	135210	158330
H7C3E9;Q9NY93;F8WEI3;F8WDT8;G3V0G3	H7C3E9;Q9NY93;F8WEI3;F8WDT8;G3V0G3	2;2;1;1;1	2;2;1;1;1	2;2;1;1;1	Probable ATP-dependent RNA helicase DDX56	DDX56	;;;;	5	2	2	2	0	1	1	0	1	0	0	1	1	0	1	0	0	1	1	0	1	0	9.1	9.1	9.1	44.046	396	396;547;103;185;375	1	3	0	2.3441	0	3.8	5.3	0	3.8	0	323380	0	129720	148110
J3KPS2;Q6ZRV2	J3KPS2;Q6ZRV2	2;2	2;2	2;2	Protein FAM83H	FAM83H	;	2	2	2	2	0	0	0	1	1	1	0	0	0	1	1	1	0	0	0	1	1	1	3.9	3.9	3.9	96.337	906	906;1179	1	3	0	2.541	0	0	0	2.1	2.1	1.8	544900	0	0	0
J3KTK0;J3KSW6;Q8IX18	J3KTK0;J3KSW6;Q8IX18	1;1;1	1;1;1	1;1;1	Probable ATP-dependent RNA helicase DHX40	DHX40	;;	3	1	1	1	0	0	0	1	1	1	0	0	0	1	1	1	0	0	0	1	1	1	6.9	6.9	6.9	19.349	173	173;268;779	1	3	0	2.703	0	0	0	6.9	6.9	6.9	312070	0	0	0
J3QRS3;P19105;J3KTJ1;P24844	J3QRS3;P19105;J3KTJ1;P24844	13;13;7;7	1;1;1;0	1;1;1;0	Myosin regulatory light chain 12A;Myosin regulatory light polypeptide 9	MYL12A;MYL9	;;;	4	13	1	1	13	13	12	5	7	6	1	1	1	0	0	0	1	1	1	0	0	0	78	16.9	16.9	20.457	177	177;171;114;172	1	3	1	-2	78	78	78	33.3	49.2	39	598910	254820	197130	146960
K7EIG9;Q96D70	K7EIG9;Q96D70	1;1	1;1	1;1	R3H domain-containing protein 4	R3HDM4	;	2	1	1	1	0	0	0	1	1	1	0	0	0	1	1	1	0	0	0	1	1	1	7.7	7.7	7.7	28.186	247	247;268	1	3	0	2.6188	0	0	0	7.7	7.7	7.7	381300	0	0	0
K7EM38;J3KT65	K7EM38;J3KT65	12;11	1;0	1;0		ACTG1	;	2	12	1	1	11	12	11	6	6	5	1	1	1	0	0	0	1	1	1	0	0	0	91.7	7.5	7.5	14.522	133	133;198	1	3	0	3.3498	87.2	91.7	87.2	54.1	54.1	45.9	7077600	3136700	1863400	2077500
Q5VV87;Q5VV89;O14880	Q5VV87;Q5VV89;O14880	2;2;2	2;2;2	2;2;2	Microsomal glutathione S-transferase 3	MGST3	;;	3	2	2	2	1	1	0	1	0	0	1	1	0	1	0	0	1	1	0	1	0	0	29.5	29.5	29.5	14.379	129	129;166;152	1	3	0	7.6937	10.1	10.1	0	19.4	0	0	823860	699420	0	0
O60645	O60645	1	1	1	Exocyst complex component 3	EXOC3		1	1	1	1	0	0	1	1	0	0	0	0	1	1	0	0	0	0	1	1	0	0	2.2	2.2	2.2	86.844	756	756	1	3	0	2.7492	0	0	2.2	2.2	0	0	210680	0	0	159290
O75477	O75477	2	1	1	Erlin-1	ERLIN1		1	2	1	1	2	2	2	1	0	1	1	1	1	0	0	0	1	1	1	0	0	0	7.5	4	4	38.925	346	346	1	3	0	3.7483	7.5	7.5	7.5	3.5	0	3.5	2645100	1221300	626380	797440
P00492	P00492	2	2	2	Hypoxanthine-guanine phosphoribosyltransferase	HPRT1		1	2	2	2	0	0	0	1	1	1	0	0	0	1	1	1	0	0	0	1	1	1	9.6	9.6	9.6	24.579	218	218	1	3	0	3.4742	0	0	0	4.6	4.6	5	540470	0	0	0
Q3BDU5;P02545;Q5TCI8	Q3BDU5;P02545;Q5TCI8	3;3;2	2;2;1	2;2;1	Prelamin-A/C;Lamin-A/C	LMNA	;;	3	3	2	2	1	1	3	0	0	0	1	0	2	0	0	0	1	0	2	0	0	0	7.8	6.2	6.2	55.637	487	487;664;491	1	3	0	3.9793	2.9	1.6	7.8	0	0	0	227290	0	0	227290
P08240	P08240	1	1	1	Signal recognition particle receptor subunit alpha	SRPR		1	1	1	1	1	0	0	1	1	0	1	0	0	1	1	0	1	0	0	1	1	0	1.6	1.6	1.6	69.81	638	638	1	3	0.0058423	1.8009	1.6	0	0	1.6	1.6	0	156970	52118	0	0
P08559;Q5JPU3;Q5JPU0;Q5JPT9;Q5JPU1;P29803	P08559;Q5JPU3	3;2;1;1;1;1	3;2;1;1;1;1	3;2;1;1;1;1	Pyruvate dehydrogenase E1 component subunit alpha, somatic form, mitochondrial	PDHA1	;	6	3	3	3	2	0	2	1	0	1	2	0	2	1	0	1	2	0	2	1	0	1	11	11	11	43.295	390	390;109;180;203;205;388	1	6	0	5.1133	8.7	0	8.7	2.3	0	3.6	3096100	1402600	0	905150
P10412	P10412	6	1	1	Histone H1.4	HIST1H1E		1	6	1	1	6	6	6	4	5	4	1	1	1	0	0	0	1	1	1	0	0	0	22.8	7.3	7.3	21.865	219	219	1	3	0	2.7661	22.8	22.8	22.8	15.1	15.5	15.1	5367500	569550	339460	4458500
P11172;F2Z3P2;F2Z303;F8WDG4;E9PFD2	P11172	3;1;1;1;1	3;1;1;1;1	3;1;1;1;1	Uridine 5-monophosphate synthase;Orotate phosphoribosyltransferase;Orotidine 5-phosphate decarboxylase	UMPS		5	3	3	3	0	0	0	2	1	0	0	0	0	2	1	0	0	0	0	2	1	0	7.7	7.7	7.7	52.221	480	480;57;66;142;342	1	3	0	4.8334	0	0	0	5.4	2.3	0	464140	0	0	0
P11387;E5RIC7;Q969P6	P11387;E5RIC7;Q969P6	2;1;1	2;1;1	2;1;1	DNA topoisomerase 1;DNA topoisomerase I, mitochondrial	TOP1;TOP1MT	;;	3	2	2	2	1	1	1	0	0	0	1	1	1	0	0	0	1	1	1	0	0	0	2.6	2.6	2.6	90.725	765	765;376;601	1	3	0	5.8633	1.4	1.2	1.2	0	0	0	609250	178590	430660	0
P12883;P13533	P12883;P13533	2;2	1;1	1;1	Myosin-7;Myosin-6	MYH7;MYH6	;	2	2	1	1	2	2	1	0	0	0	1	1	1	0	0	0	1	1	1	0	0	0	1	0.5	0.5	223.09	1935	1935;1939	1	3	0.0010672	2.2427	1	1	0.5	0	0	0	1680500	663330	518940	498270
P14174	P14174	1	1	1	Macrophage migration inhibitory factor	MIF		1	1	1	1	0	0	0	1	1	1	0	0	0	1	1	1	0	0	0	1	1	1	9.6	9.6	9.6	12.476	115	115	1	3	0	4.6366	0	0	0	9.6	9.6	9.6	2495800	0	0	0
P30041	P30041	2	2	2	Peroxiredoxin-6	PRDX6		1	2	2	2	1	1	1	0	0	0	1	1	1	0	0	0	1	1	1	0	0	0	11.6	11.6	11.6	25.035	224	224	1	3	0.0030896	2.0187	7.6	4	4	0	0	0	787020	559660	110130	117220
P38919	P38919	4	2	2	Eukaryotic initiation factor 4A-III;Eukaryotic initiation factor 4A-III, N-terminally processed	EIF4A3		1	4	2	2	3	1	2	1	1	2	2	1	0	0	0	0	2	1	0	0	0	0	11.7	5.8	5.8	46.871	411	411	1	3	0	4.5921	7.8	3.2	5.8	3.9	1.9	5.8	635020	324630	310390	0
Q5T5C7;P49591	Q5T5C7;P49591	2;2	2;2	2;2	Serine--tRNA ligase, cytoplasmic	SARS	;	2	2	2	2	0	2	1	0	0	0	0	2	1	0	0	0	0	2	1	0	0	0	7.3	7.3	7.3	61.312	536	536;514	1	3	0.0058196	1.7851	0	7.3	1.7	0	0	0	932950	0	510320	422630
P49756	P49756	1	1	1	RNA-binding protein 25	RBM25		1	1	1	1	0	0	1	1	1	0	0	0	1	1	1	0	0	0	1	1	1	0	3	3	3	100.18	843	843	1	3	0.0010764	2.3072	0	0	3	3	3	0	261250	0	0	86178
P51970	P51970	1	1	1	NADH dehydrogenase [ubiquinone] 1 alpha subcomplex subunit 8	NDUFA8		1	1	1	1	1	1	1	0	0	0	1	1	1	0	0	0	1	1	1	0	0	0	10.5	10.5	10.5	20.105	172	172	1	3	0	4.987	10.5	10.5	10.5	0	0	0	1535300	647510	344470	543310
Q00587	Q00587	1	1	1	Cdc42 effector protein 1	CDC42EP1		1	1	1	1	0	0	0	1	1	1	0	0	0	1	1	1	0	0	0	1	1	1	4.9	4.9	4.9	40.294	391	391	1	3	0	3.8236	0	0	0	4.9	4.9	4.9	1648400	0	0	0
Q09666	Q09666	2	2	2	Neuroblast differentiation-associated protein AHNAK	AHNAK		1	2	2	2	1	1	1	0	0	0	1	1	1	0	0	0	1	1	1	0	0	0	3.4	3.4	3.4	629.09	5890	5890	1	3	0.0030832	2.0104	2.1	2.1	1.3	0	0	0	1363400	685280	387690	290430
Q14008	Q14008	1	1	1	Cytoskeleton-associated protein 5	CKAP5		1	1	1	1	1	1	1	0	0	0	1	1	1	0	0	0	1	1	1	0	0	0	1.1	1.1	1.1	225.49	2032	2032	1	3	0.0010537	2.1406	1.1	1.1	1.1	0	0	0	170420	76668	52764	40987
Q14152	Q14152	2	2	2	Eukaryotic translation initiation factor 3 subunit A	EIF3A		1	2	2	2	2	0	0	0	1	0	2	0	0	0	1	0	2	0	0	0	1	0	1.7	1.7	1.7	166.57	1382	1382	1	3	0	2.5278	1.7	0	0	0	1.1	0	486130	366650	0	0
Q14566	Q14566	1	1	1	DNA replication licensing factor MCM6	MCM6		1	1	1	1	1	1	1	0	0	0	1	1	1	0	0	0	1	1	1	0	0	0	1.5	1.5	1.5	92.888	821	821	1	3	0	2.8087	1.5	1.5	1.5	0	0	0	194990	62921	61020	71051
Q14657	Q14657	2	2	2	EKC/KEOPS complex subunit LAGE3	LAGE3		1	2	2	2	0	0	0	1	1	1	0	0	0	1	1	1	0	0	0	1	1	1	26.6	26.6	26.6	14.804	143	143	1	3	0	4.1506	0	0	0	10.5	10.5	16.1	275750	0	0	0
Q15054;H0YEX7;E9PRK3	Q15054	3;1;1	3;1;1	3;1;1	DNA polymerase delta subunit 3	POLD3		3	3	3	3	0	1	1	0	0	1	0	1	1	0	0	1	0	1	1	0	0	1	7.5	7.5	7.5	51.4	466	466;89;169	1	3	0	4.0433	0	2.8	1.9	0	0	2.8	674310	0	356860	0
Q5SVS4	Q5SVS4	1	1	1	Kidney mitochondrial carrier protein 1	SLC25A30		1	1	1	1	0	0	0	1	1	1	0	0	0	1	1	1	0	0	0	1	1	1	3.8	3.8	3.8	32.474	291	291	1	3	0.0039722	1.8931	0	0	0	3.8	3.8	3.8	886210	0	0	0
Q6NUQ1	Q6NUQ1	1	1	1	RAD50-interacting protein 1	RINT1		1	1	1	1	1	1	1	0	0	0	1	1	1	0	0	0	1	1	1	0	0	0	2.8	2.8	2.8	90.631	792	792	1	3	0	2.9601	2.8	2.8	2.8	0	0	0	212100	95568	55479	61050
Q6ZVX7	Q6ZVX7	1	1	1	F-box only protein 50	NCCRP1		1	1	1	1	0	0	0	1	1	0	0	0	0	1	1	0	0	0	0	1	1	0	4	4	4	30.847	275	275	1	3	0	2.3585	0	0	0	4	4	0	231360	0	0	0
Q86V81;E9PB61	Q86V81;E9PB61	2;1	2;1	2;1	THO complex subunit 4	ALYREF	;	2	2	2	2	1	1	1	0	0	0	1	1	1	0	0	0	1	1	1	0	0	0	9.3	9.3	9.3	26.888	257	257;264	1	3	0	3.056	5.1	4.3	4.3	0	0	0	1990300	575190	393290	1021900
Q8IVW6	Q8IVW6	1	1	1	AT-rich interactive domain-containing protein 3B	ARID3B		1	1	1	1	1	1	1	0	0	0	1	1	1	0	0	0	1	1	1	0	0	0	2.1	2.1	2.1	60.636	561	561	1	3	0	2.3135	2.1	2.1	2.1	0	0	0	91737	40993	23984	26760
Q8NC51	Q8NC51	2	2	2	Plasminogen activator inhibitor 1 RNA-binding protein	SERBP1		1	2	2	2	1	0	0	0	2	0	1	0	0	0	2	0	1	0	0	0	2	0	4.4	4.4	4.4	44.965	408	408	1	3	0.0040527	1.9527	2	0	0	0	4.4	0	1031600	551930	0	0
Q8WTT2	Q8WTT2	2	2	2	Nucleolar complex protein 3 homolog	NOC3L		1	2	2	2	1	0	1	0	1	0	1	0	1	0	1	0	1	0	1	0	1	0	1.5	1.5	1.5	92.547	800	800	1	3	0	2.4238	1.4	0	1.5	0	1.5	0	148500	28124	0	76156
Q92900	Q92900	2	2	2	Regulator of nonsense transcripts 1	UPF1		1	2	2	2	0	0	0	2	0	1	0	0	0	2	0	1	0	0	0	2	0	1	2.6	2.6	2.6	124.34	1129	1129	1	3	0	2.8331	0	0	0	2.6	0	1	817480	0	0	0
Q96HR8	Q96HR8	1	1	1	H/ACA ribonucleoprotein complex non-core subunit NAF1	NAF1		1	1	1	1	1	1	1	0	0	0	1	1	1	0	0	0	1	1	1	0	0	0	3	3	3	53.716	494	494	1	3	0	2.7623	3	3	3	0	0	0	102690	41412	32796	28481
Q9BSF4	Q9BSF4	1	1	1	Uncharacterized protein C19orf52	C19orf52		1	1	1	1	0	0	0	1	1	1	0	0	0	1	1	1	0	0	0	1	1	1	3.5	3.5	3.5	29.233	260	260	1	3	0.0031024	2.0469	0	0	0	3.5	3.5	3.5	185840	0	0	0
Q9BU23	Q9BU23	2	2	2	Lipase maturation factor 2	LMF2		1	2	2	2	2	0	1	0	0	0	2	0	1	0	0	0	2	0	1	0	0	0	3.7	3.7	3.7	79.697	707	707	1	3	0	3.6774	3.7	0	2.5	0	0	0	782060	552300	0	229750
Q9BVK6	Q9BVK6	2	2	2	Transmembrane emp24 domain-containing protein 9	TMED9		1	2	2	2	1	0	2	0	0	0	1	0	2	0	0	0	1	0	2	0	0	0	8.9	8.9	8.9	27.277	235	235	1	3	0	3.5806	4.3	0	8.9	0	0	0	1044700	0	0	1044700
Q9BZE4	Q9BZE4	2	2	2	Nucleolar GTP-binding protein 1	GTPBP4		1	2	2	2	2	0	1	0	0	0	2	0	1	0	0	0	2	0	1	0	0	0	3.5	3.5	3.5	73.964	634	634	1	3	0	2.7192	3.5	0	2.1	0	0	0	795580	454710	0	340870
Q9H900	Q9H900	2	2	2	Protein zwilch homolog	ZWILCH		1	2	2	2	1	1	1	0	0	0	1	1	1	0	0	0	1	1	1	0	0	0	4.2	4.2	4.2	67.213	591	591	1	3	0	3.2358	2.5	1.7	1.7	0	0	0	361160	28568	211820	120780
Q9UMY1	Q9UMY1	1	1	1	Nucleolar protein 7	NOL7		1	1	1	1	0	0	0	1	1	1	0	0	0	1	1	1	0	0	0	1	1	1	5.4	5.4	5.4	29.426	257	257	1	3	0	18.425	0	0	0	5.4	5.4	5.4	261330	0	0	0
Q9Y3B4	Q9Y3B4	2	2	2	Splicing factor 3B subunit 6	SF3B6		1	2	2	2	1	0	1	0	0	0	1	0	1	0	0	0	1	0	1	0	0	0	20.8	20.8	20.8	14.585	125	125	1	2	0	3.0693	9.6	0	11.2	0	0	0	797100	574700	0	222400
REV__Q09666	REV__Q09666	2	2	2				1	2	2	2	1	1	1	0	0	0	1	1	1	0	0	0	1	1	1	0	0	0	0	0	0	629.09	5890	5890	1	3	0.0041068	2.0005	0	0	0	0	0	0	6647300	1041000	3063300	2543000
REV__Q9NS62	REV__Q9NS62	1	1	1				1	1	1	1	1	1	1	0	0	0	1	1	1	0	0	0	1	1	1	0	0	0	0	0	0	94.583	852	852	1	3	0.0095329	1.6967	0	0	0	0	0	0	2104400	1020300	491780	592250
S4R341	S4R341	3	1	1		NOLC1		1	3	1	1	3	3	3	1	2	2	1	1	1	0	0	0	1	1	1	0	0	0	67.1	32.9	32.9	8.0509	73	73	1	3	0	13.836	67.1	67.1	67.1	20.5	34.2	34.2	799700	341510	230670	227520
A0A075B6Z2	A0A075B6Z2	1	1	1		TRAJ56		1	1	1	1	0	0	1	1	0	0	0	0	1	1	0	0	0	0	1	1	0	0	38.1	38.1	38.1	2.1104	21	21	1	2	0.0093721	1.6333	0	0	38.1	38.1	0	0	750650000	0	0	296850000
A0A087X0U3;A0A087WT87;P43003	A0A087X0U3;A0A087WT87;P43003	1;1;1	1;1;1	1;1;1	Amino acid transporter;Excitatory amino acid transporter 1	SLC1A3	;;	3	1	1	1	1	0	1	0	0	0	1	0	1	0	0	0	1	0	1	0	0	0	2.8	2.8	2.8	47.099	430	430;496;542	1	2	0	2.9926	2.8	0	2.8	0	0	0	382000	234420	0	147580
F8WAX6;A0A087X211;Q8TCG1	F8WAX6;A0A087X211;Q8TCG1	1;1;1	1;1;1	1;1;1	Protein CIP2A	KIAA1524	;;	3	1	1	1	0	1	1	0	0	0	0	1	1	0	0	0	0	1	1	0	0	0	7.4	7.4	7.4	13.23	121	121;906;905	1	2	0.0067372	1.7667	0	7.4	7.4	0	0	0	354870	0	194970	159900
A6NE76;A0A0A0MR50;K4DI93;Q13619;Q13620	A6NE76;A0A0A0MR50;K4DI93;Q13619;Q13620	1;1;1;1;1	1;1;1;1;1	1;1;1;1;1	Cullin-4A;Cullin-4B	CUL4B;CUL4A	;;;;	5	1	1	1	0	0	1	0	0	1	0	0	1	0	0	1	0	0	1	0	0	1	4.7	4.7	4.7	27.889	234	234;667;900;759;913	1	2	0	3.154	0	0	4.7	0	0	4.7	118440	0	0	73100
H0YC55;A0A0A6YYG7;Q6IBW4	H0YC55;A0A0A6YYG7;Q6IBW4	1;1;1	1;1;1	1;1;1	Condensin-2 complex subunit H2	NCAPH2	;;	3	1	1	1	0	1	0	0	0	1	0	1	0	0	0	1	0	1	0	0	0	1	7.1	7.1	7.1	15.955	141	141;589;605	1	2	0.003992	1.9015	0	7.1	0	0	0	7.1	302670	0	0	0
D6RJA6;A0A0C4DG89;Q7L014	D6RJA6;A0A0C4DG89;Q7L014	1;1;1	1;1;1	1;1;1	Probable ATP-dependent RNA helicase DDX46	DDX46	;;	3	1	1	1	0	0	0	1	1	0	0	0	0	1	1	0	0	0	0	1	1	0	2.1	2.1	2.1	53.964	471	471;1032;1031	1	2	0	2.4317	0	0	0	2.1	2.1	0	67607	0	0	0
A0A140T975;A0A140T955;A0A140T941;A0A140T933;A0A140T8W8;Q9GJ45;A0A140T9Z6;B0UXQ0;A0A140T9I0;A0A140T9X5;A0A140T913;A0A140T8Y4;A0A0G2JPD3;P30512;P30459;P30457;P30456;P30453;P30450;P18462;P16190;P16189;P10316;P10314;P01892;P01891	A0A140T975;A0A140T955;A0A140T941;A0A140T933;A0A140T8W8;Q9GJ45;A0A140T9Z6;B0UXQ0;A0A140T9I0;A0A140T9X5;A0A140T913;A0A140T8Y4;A0A0G2JPD3;P30512;P30459;P30457;P30456;P30453;P30450;P18462;P16190;P16189;P10316;P10314;P01892;P01891	2;2;2;2;2;2;2;2;2;2;2;2;2;2;2;2;2;2;2;2;2;2;2;2;2;2	2;2;2;2;2;2;2;2;2;2;2;2;2;2;2;2;2;2;2;2;2;2;2;2;2;2	1;1;1;1;1;1;1;1;1;1;1;1;1;1;1;1;1;1;1;1;1;1;1;1;1;1	HLA class I histocompatibility antigen, A-29 alpha chain;HLA class I histocompatibility antigen, A-74 alpha chain;HLA class I histocompatibility antigen, A-66 alpha chain;HLA class I histocompatibility antigen, A-43 alpha chain;HLA class I histocompatibility antigen, A-34 alpha chain;HLA class I histocompatibility antigen, A-26 alpha chain;HLA class I histocompatibility antigen, A-25 alpha chain;…	HLA-A	;;;;;;;;;;;;;;;;;;;;;;;;;	26	2	2	1	0	0	2	0	0	0	0	0	2	0	0	0	0	0	1	0	0	0	13.4	13.4	5.4	34.321	299	299;299;299;299;299;326;342;365;365;371;371;371;394;365;365;365;365;365;365;365;365;365;365;365;365;365	1	2	0	4.046	0	0	13.4	0	0	0	454370	0	0	454370
A0A140T9X0;A2AB09;A0A140T9R1;O75955;A0A140T907;A0A140T9B1;A0A140T957;A0A140T910;A0A140T9C3;A0A140T959;A2AB13;A0A140T9W4;A2AB11;A0A0G2JJQ6;A2AB12;A2AB10	A0A140T9X0;A2AB09;A0A140T9R1;O75955;A0A140T907;A0A140T9B1;A0A140T957;A0A140T910;A0A140T9C3;A0A140T959;A2AB13;A0A140T9W4;A2AB11;A0A0G2JJQ6;A2AB12;A2AB10	2;2;2;2;1;1;1;1;1;1;1;1;1;1;1;1	2;2;2;2;1;1;1;1;1;1;1;1;1;1;1;1	2;2;2;2;1;1;1;1;1;1;1;1;1;1;1;1	Flotillin-1	FLOT1	;;;;;;;;;;;;;;;	16	2	2	2	1	1	0	0	0	0	1	1	0	0	0	0	1	1	0	0	0	0	11.7	11.7	11.7	26.386	231	231;238;357;427;60;115;138;147;165;182;185;186;192;210;235;252	1	2	0.008596	1.7033	8.2	3.5	0	0	0	0	78682	78682	0	0
K7EMZ9;A0A140TA76;Q8ND56	K7EMZ9;A0A140TA76;Q8ND56	1;1;1	1;1;1	1;1;1	Protein LSM14 homolog A	LSM14A	;;	3	1	1	1	0	1	1	0	0	0	0	1	1	0	0	0	0	1	1	0	0	0	3.2	3.2	3.2	34.488	314	314;344;463	1	2	0	2.4083	0	3.2	3.2	0	0	0	359980	0	174650	185340
A0A1B0GVP4	A0A1B0GVP4	1	1	1				1	1	1	1	1	0	1	0	0	0	1	0	1	0	0	0	1	0	1	0	0	0	0.6	0.6	0.6	211.48	1871	1871	1	2	1	-2	0.6	0	0.6	0	0	0	15895000	10139000	0	5756200
H7C0R3;B4DDN1;A0A1B0GVU9;P47897;A0A1B0GTT3;A0A0U1RQQ5	H7C0R3;B4DDN1;A0A1B0GVU9;P47897;A0A1B0GTT3;A0A0U1RQQ5	2;2;2;2;1;1	2;2;2;2;1;1	2;2;2;2;1;1	Glutamine--tRNA ligase	QARS	;;;;;	6	2	2	2	2	0	0	0	0	0	2	0	0	0	0	0	2	0	0	0	0	0	7.1	7.1	7.1	28.565	253	253;630;736;775;169;194	1	2	0	2.3956	7.1	0	0	0	0	0	737590	737590	0	0
A6NEM2;P51610	A6NEM2;P51610	1;1	1;1	1;1	Host cell factor 1;HCF N-terminal chain 1;HCF N-terminal chain 2;HCF N-terminal chain 3;HCF N-terminal chain 4;HCF N-terminal chain 5;HCF N-terminal chain 6;HCF C-terminal chain 1;HCF C-terminal chain 2;HCF C-terminal chain 3;HCF C-terminal chain 4;HCF C-terminal chain 5;HCF C-terminal chain 6	HCFC1	;	2	1	1	1	1	1	0	0	0	0	1	1	0	0	0	0	1	1	0	0	0	0	0.8	0.8	0.8	213.47	2080	2080;2035	1	2	0.0030864	2.0169	0.8	0.8	0	0	0	0	213980	128200	85788	0
I3L2R3;I3L2T8;I3L533;I3L2R9;I3L522;J3QSD2;J3QRZ1;A6NIZ0;Q9GZM8;Q9NXR1	I3L2R3;I3L2T8;I3L533;I3L2R9;I3L522;J3QSD2;J3QRZ1;A6NIZ0;Q9GZM8;Q9NXR1	1;1;1;1;1;1;1;1;1;1	1;1;1;1;1;1;1;1;1;1	1;1;1;1;1;1;1;1;1;1	Nuclear distribution protein nudE-like 1;Nuclear distribution protein nudE homolog 1	NDE1;NDEL1	;;;;;;;;;	10	1	1	1	0	0	0	1	1	0	0	0	0	1	1	0	0	0	0	1	1	0	8.8	8.8	8.8	14.077	137	137;139;153;173;192;194;196;269;345;346	1	2	0.0020964	2.1149	0	0	0	8.8	8.8	0	161100	0	0	0
B3KXD6;B5MCF9;O00541;H7C267	B3KXD6;B5MCF9;O00541;H7C267	2;2;2;1	2;2;2;1	2;2;2;1	Pescadillo homolog	PES1	;;;	4	2	2	2	0	2	0	0	0	0	0	2	0	0	0	0	0	2	0	0	0	0	4	4	4	51.464	449	449;571;588;194	1	2	0.0010571	2.1796	0	4	0	0	0	0	687050	0	687050	0
CON__Q5XQN5;CON__Q922U2;F8VUG2	CON__Q5XQN5;CON__Q922U2	27;22;6	1;1;1	0;0;0			;	3	27	1	0	22	20	20	24	24	23	0	0	0	0	1	1	0	0	0	0	0	0	39.9	1.5	0	62.936	601	601;580;273	1	2	1	-2	34.1	31.4	27.3	35.9	35.6	35.4	683070	0	0	0
Q5T985;CON__Q9TRI1;P19823;Q5T987	Q5T985;CON__Q9TRI1;P19823;Q5T987	2;2;2;1	2;2;2;1	2;2;2;1	Inter-alpha-trypsin inhibitor heavy chain H2	ITIH2	;;;	4	2	2	2	0	0	0	1	1	0	0	0	0	1	1	0	0	0	0	1	1	0	2.8	2.8	2.8	105.21	935	935;946;946;237	1	2	0	2.7137	0	0	0	1.2	1.6	0	332880	0	0	0
D6R939;E7EWC2;F5H7S7;Q13576	D6R939;E7EWC2;F5H7S7;Q13576	1;1;1;1	1;1;1;1	1;1;1;1	Ras GTPase-activating-like protein IQGAP2	IQGAP2	;;;	4	1	1	1	0	0	0	1	0	1	0	0	0	1	0	1	0	0	0	1	0	1	3.5	3.5	3.5	94.717	824	824;1402;1525;1575	1	2	0.0094251	1.6537	0	0	0	3.5	0	3.5	131610	0	0	0
E9PGG1;E7EUM4;E7ERR6;E7ERH4;E7ET01;E7ETL8;E7EQU2;E7ESD3;E7EMU4;E7EV09;E7EQL5;Q13409;E7EU01	E9PGG1;E7EUM4;E7ERR6;E7ERH4;E7ET01;E7ETL8;E7EQU2;E7ESD3;E7EMU4;E7EV09;E7EQL5;Q13409;E7EU01	2;2;2;2;2;2;2;2;2;2;2;2;1	2;2;2;2;2;2;2;2;2;2;2;2;1	2;2;2;2;2;2;2;2;2;2;2;2;1	Cytoplasmic dynein 1 intermediate chain 2	DYNC1I2	;;;;;;;;;;;;	13	2	2	2	1	1	0	0	0	0	1	1	0	0	0	0	1	1	0	0	0	0	31.8	31.8	31.8	12.328	110	110;137;139;151;173;184;185;187;214;250;305;638;121	1	2	0	2.4261	12.7	19.1	0	0	0	0	1198500	950980	247510	0
E7ERX9;Q9NQT8	E7ERX9;Q9NQT8	2;2	1;1	1;1	Kinesin-like protein;Kinesin-like protein KIF13B	KIF13B	;	2	2	1	1	0	0	0	2	0	1	0	0	0	1	0	1	0	0	0	1	0	1	2.7	1.5	1.5	83.877	743	743;1826	1	2	0	2.5502	0	0	0	2.7	0	1.5	2172700	0	0	0
H0YJ11;H0YJW3;H7C5W8;H7C144;F5GXS2;H9KV75;P12814;O43707	H0YJ11;H0YJW3;H7C5W8;H7C144;F5GXS2;H9KV75;P12814;O43707	1;1;1;1;1;1;1;1	1;1;1;1;1;1;1;1	1;1;1;1;1;1;1;1	Alpha-actinin-1;Alpha-actinin-4	ACTN1;ACTN4	;;;;;;;	8	1	1	1	1	1	0	0	0	0	1	1	0	0	0	0	1	1	0	0	0	0	5.8	5.8	5.8	24.263	207	207;251;297;342;521;822;892;911	1	2	0	3.7624	5.8	5.8	0	0	0	0	381770	234990	146780	0
F6W983;Q969N2	F6W983;Q969N2	1;1	1;1	1;1	GPI transamidase component PIG-T	PIGT	;	2	1	1	1	1	1	0	0	0	0	1	1	0	0	0	0	1	1	0	0	0	0	8.7	8.7	8.7	19.681	172	172;578	1	2	0	2.5264	8.7	8.7	0	0	0	0	126210	76835	49376	0
F8WCB4	F8WCB4	1	1	1		TRAPPC12		1	1	1	1	1	0	0	1	0	0	1	0	0	1	0	0	1	0	0	1	0	0	36.4	36.4	36.4	6.1993	55	55	1	2	1	-2	36.4	0	0	36.4	0	0	2619500	1504300	0	0
G3V5M2;P00491;G3V393;G3V2H3	G3V5M2;P00491;G3V393;G3V2H3	2;2;1;1	2;2;1;1	2;2;1;1	Purine nucleoside phosphorylase	PNP	;;;	4	2	2	2	0	0	0	1	1	0	0	0	0	1	1	0	0	0	0	1	1	0	8.6	8.6	8.6	24.479	221	221;289;61;93	1	2	0.005848	1.8054	0	0	0	4.1	4.5	0	0	0	0	0
H0YCA5;Q9BVQ7	H0YCA5;Q9BVQ7	1;1	1;1	1;1	Spermatogenesis-associated protein 5-like protein 1	SPATA5L1	;	2	1	1	1	1	0	0	1	0	0	1	0	0	1	0	0	1	0	0	1	0	0	7.4	7.4	7.4	28.46	258	258;753	1	2	0	2.8803	7.4	0	0	7.4	0	0	84622	35068	0	0
H0YCQ7;Q2KHR3	H0YCQ7;Q2KHR3	2;2	2;2	2;2	Glutamine and serine-rich protein 1	QSER1	;	2	2	2	2	1	1	0	0	0	0	1	1	0	0	0	0	1	1	0	0	0	0	2.8	2.8	2.8	86.998	780	780;1735	1	2	0.0067243	1.7509	1.5	1.3	0	0	0	0	60933	60933	0	0
H0YNG3;P67812;H0YKT4;H0YNA5	H0YNG3;P67812;H0YKT4;H0YNA5	2;2;1;1	2;2;1;1	1;1;1;0	Signal peptidase complex catalytic subunit SEC11;Signal peptidase complex catalytic subunit SEC11A;Signal peptidase I	SEC11A	;;;	4	2	2	1	0	0	1	1	0	0	0	0	1	1	0	0	0	0	1	0	0	0	11.7	11.7	6.7	18.651	163	163;179;129;135	1	2	0	3.5404	0	0	6.7	4.9	0	0	323190	0	0	96893
H3BR82;H3BMF4;Q9H2V7	H3BR82;H3BMF4;Q9H2V7	1;1;1	1;1;1	1;1;1	Protein spinster homolog 1	SPNS1	;;	3	1	1	1	0	1	1	0	0	0	0	1	1	0	0	0	0	1	1	0	0	0	3.2	3.2	3.2	57.19	538	538;573;528	1	2	0.0094162	1.6494	0	3.2	3.2	0	0	0	331380	0	159700	171680
H3BPG5;H3BV80;H3BMS0;H3BMM9;H3BTC0;Q15287	H3BPG5;H3BV80;H3BMS0;H3BMM9;H3BTC0;Q15287	1;1;1;1;1;1	1;1;1;1;1;1	1;1;1;1;1;1	RNA-binding protein with serine-rich domain 1	RNPS1	;;;;;	6	1	1	1	0	1	1	0	0	0	0	1	1	0	0	0	0	1	1	0	0	0	11.7	11.7	11.7	15.108	128	128;211;257;284;302;305	1	2	0	2.4211	0	11.7	11.7	0	0	0	709270	0	376550	332720
H3BUR4;Q9ULX3	H3BUR4;Q9ULX3	1;1	1;1	1;1	RNA-binding protein NOB1	NOB1	;	2	1	1	1	1	0	0	0	0	1	1	0	0	0	0	1	1	0	0	0	0	1	13.6	13.6	13.6	7.5737	66	66;412	1	2	0.001073	2.2897	13.6	0	0	0	0	13.6	611550	430930	0	0
Q5T7U0;H7BY84;Q5T7U1;Q9Y5Q8;H0Y5D2	Q5T7U0;H7BY84;Q5T7U1;Q9Y5Q8;H0Y5D2	2;2;2;2;1	2;2;2;2;1	2;2;2;2;1	General transcription factor 3C polypeptide 5	GTF3C5	;;;;	5	2	2	2	0	0	1	0	0	1	0	0	1	0	0	1	0	0	1	0	0	1	8.5	8.5	8.5	26.267	224	224;345;457;519;90	1	2	0.0010616	2.2296	0	0	4.9	0	0	3.6	0	0	0	0
K7EIN4;K7EQ63;Q13445	K7EIN4;K7EQ63;Q13445	1;1;1	1;1;1	1;1;1	Transmembrane emp24 domain-containing protein 1	TMED1	;;	3	1	1	1	0	0	1	0	1	0	0	0	1	0	1	0	0	0	1	0	1	0	11	11	11	9.6352	82	82;191;227	1	2	0.0010707	2.2874	0	0	11	0	11	0	686350	0	0	361070
O00411	O00411	1	1	1	DNA-directed RNA polymerase, mitochondrial	POLRMT		1	1	1	1	1	1	0	0	0	0	1	1	0	0	0	0	1	1	0	0	0	0	1.8	1.8	1.8	138.62	1230	1230	1	2	0.0094607	1.6644	1.8	1.8	0	0	0	0	77781	47319	30462	0
O15371;B0QYA4;B0QYA6;B0QYA5	O15371;B0QYA4;B0QYA6;B0QYA5	2;1;1;1	2;1;1;1	2;1;1;1	Eukaryotic translation initiation factor 3 subunit D	EIF3D	;;;	4	2	2	2	0	0	0	0	1	1	0	0	0	0	1	1	0	0	0	0	1	1	4.2	4.2	4.2	63.972	548	548;105;173;269	1	2	0	3.4437	0	0	0	0	2.2	2	363360	0	0	0
O43237;J3KRZ2;J3KRI4;B4E2E0	O43237;J3KRZ2;J3KRI4;B4E2E0	2;1;1;1	2;1;1;1	2;1;1;1	Cytoplasmic dynein 1 light intermediate chain 2	DYNC1LI2	;;;	4	2	2	2	0	1	1	0	0	0	0	1	1	0	0	0	0	1	1	0	0	0	6.9	6.9	6.9	54.099	492	492;92;167;271	1	2	0.0067568	1.7692	0	3.9	3	0	0	0	396260	0	37942	358310
O43913	O43913	2	2	2	Origin recognition complex subunit 5	ORC5		1	2	2	2	0	1	0	0	0	1	0	1	0	0	0	1	0	1	0	0	0	1	4.8	4.8	4.8	50.282	435	435	1	2	0	4.3041	0	2.8	0	0	0	2.1	307120	0	123070	0
V9GYU0;V9GYS0;O60830	V9GYU0;V9GYS0;O60830	1;1;1	1;1;1	1;1;1	Mitochondrial import inner membrane translocase subunit Tim17-B	TIMM17B	;;	3	1	1	1	0	1	1	0	0	0	0	1	1	0	0	0	0	1	1	0	0	0	13.8	13.8	13.8	17.023	159	159;192;172	1	2	0.0093809	1.6379	0	13.8	13.8	0	0	0	1671600	0	719740	951890
O75319	O75319	1	1	1	RNA/RNP complex-1-interacting phosphatase	DUSP11		1	1	1	1	0	0	0	1	1	0	0	0	0	1	1	0	0	0	0	1	1	0	4.2	4.2	4.2	38.938	330	330	1	2	0.0010695	2.2741	0	0	0	4.2	4.2	0	843390	0	0	0
P13674	P13674	2	2	2	Prolyl 4-hydroxylase subunit alpha-1	P4HA1		1	2	2	2	0	0	0	0	1	1	0	0	0	0	1	1	0	0	0	0	1	1	6.2	6.2	6.2	61.049	534	534	1	2	0	2.4236	0	0	0	0	2.6	3.6	466190	0	0	0
P20618	P20618	2	2	2	Proteasome subunit beta type-1	PSMB1		1	2	2	2	0	0	0	2	0	0	0	0	0	2	0	0	0	0	0	2	0	0	13.3	13.3	13.3	26.489	241	241	1	2	0.0059406	1.8791	0	0	0	13.3	0	0	429260	0	0	0
P28066	P28066	1	1	1	Proteasome subunit alpha type-5	PSMA5		1	1	1	1	0	1	1	0	0	0	0	1	1	0	0	0	0	1	1	0	0	0	5.8	5.8	5.8	26.411	241	241	1	2	0	3.0317	0	5.8	5.8	0	0	0	583740	0	280540	303200
P33981	P33981	1	1	1	Dual specificity protein kinase TTK	TTK		1	1	1	1	0	0	0	1	0	1	0	0	0	1	0	1	0	0	0	1	0	1	1.5	1.5	1.5	97.071	857	857	1	2	0.0058537	1.8106	0	0	0	1.5	0	1.5	147930	0	0	0
P41208	P41208	1	1	1	Centrin-2	CETN2		1	1	1	1	0	1	1	0	0	0	0	1	1	0	0	0	0	1	1	0	0	0	7.6	7.6	7.6	19.738	172	172	1	2	0	2.8824	0	7.6	7.6	0	0	0	209890	0	104910	104980
P42025	P42025	4	1	1	Beta-centractin	ACTR1B		1	4	1	1	3	2	4	1	1	0	1	0	1	0	0	0	1	0	1	0	0	0	11.7	4	4	42.293	376	376	1	2	0.00409	1.9861	11.7	7.4	11.7	2.7	2.7	0	1827200	1119000	0	708190
P42356	P42356	1	1	1	Phosphatidylinositol 4-kinase alpha	PI4KA		1	1	1	1	1	1	0	0	0	0	1	1	0	0	0	0	1	1	0	0	0	0	0.6	0.6	0.6	236.83	2102	2102	1	2	0	12.718	0.6	0.6	0	0	0	0	159600	102800	56802	0
P50416	P50416	1	1	1	Carnitine O-palmitoyltransferase 1, liver isoform	CPT1A		1	1	1	1	1	0	0	0	1	0	1	0	0	0	1	0	1	0	0	0	1	0	1.8	1.8	1.8	88.367	773	773	1	2	0	2.8748	1.8	0	0	0	1.8	0	245540	245540	0	0
P53999	P53999	1	1	1	Activated RNA polymerase II transcriptional coactivator p15	SUB1		1	1	1	1	0	1	1	0	0	0	0	1	1	0	0	0	0	1	1	0	0	0	8.7	8.7	8.7	14.395	127	127	1	2	0.0059347	1.8789	0	8.7	8.7	0	0	0	1361200	0	691830	669370
P63092;Q5JWF2;A0A087WTB6;A2A2R6;Q5JWD1;H0Y7E8;A0A087WZE5;A0A0A0MR13;Q5JWE9;H0Y7F4;P11488;P63096;P19087;P09471;P08754;A8MTJ3;P04899;P38405	P63092;Q5JWF2;A0A087WTB6;A2A2R6;Q5JWD1;H0Y7E8;A0A087WZE5;A0A0A0MR13;Q5JWE9;H0Y7F4;P11488;P63096;P19087;P09471;P08754;A8MTJ3;P04899;P38405	2;2;1;1;1;1;1;1;1;1;1;1;1;1;1;1;1;1	2;2;1;1;1;1;1;1;1;1;1;1;1;1;1;1;1;1	2;2;1;1;1;1;1;1;1;1;1;1;1;1;1;1;1;1	Guanine nucleotide-binding protein G(s) subunit alpha isoforms short;Guanine nucleotide-binding protein G(s) subunit alpha isoforms XLas;Guanine nucleotide-binding protein G(t) subunit alpha-1;Guanine nucleotide-binding protein G(i) subunit alpha-1;Guanine nucleotide-binding protein G(t) subunit alpha-2;Guanine nucleotide-binding protein G(o) subunit alpha;Guanine nucleotide-binding protein G(k) …	GNAS;GNAO1;GNAT2;GNAT1;GNAI1;GNAI3;GNAT3;GNAI2;GNAL	;;;;;;;;;;;;;;;;;	18	2	2	2	0	1	1	0	0	0	0	1	1	0	0	0	0	1	1	0	0	0	6.9	6.9	6.9	45.664	394	394;1037;54;61;87;93;123;158;193;199;350;354;354;354;354;354;355;381	1	2	0.0010684	2.2626	0	4.1	2.8	0	0	0	958890	0	170710	788180
Q5VTU3;P63172	Q5VTU3;P63172	2;2	2;2	2;2	Dynein light chain Tctex-type 1	DYNLT1	;	2	2	2	2	0	0	2	0	0	0	0	0	2	0	0	0	0	0	2	0	0	0	43.5	43.5	43.5	10.2	92	92;113	1	2	0.0095147	1.6887	0	0	43.5	0	0	0	128130	0	0	128130
Q15382;F8WBL3;C9J931	Q15382;F8WBL3;C9J931	2;1;1	2;1;1	2;1;1	GTP-binding protein Rheb	RHEB	;;	3	2	2	2	1	1	0	0	0	0	1	1	0	0	0	0	1	1	0	0	0	0	9.2	9.2	9.2	20.497	184	184;47;79	1	2	0.008629	1.7245	5.4	3.8	0	0	0	0	370120	0	370120	0
Q5JWT2;Q9ULK4	Q5JWT2;Q9ULK4	2;2	2;2	2;2	Mediator of RNA polymerase II transcription subunit 23	MED23	;	2	2	2	2	2	0	0	0	0	0	2	0	0	0	0	0	2	0	0	0	0	0	2.5	2.5	2.5	157.11	1374	1374;1368	1	2	0	2.4251	2.5	0	0	0	0	0	252080	252080	0	0
Q5T8A0;Q9Y399	Q5T8A0;Q9Y399	1;1	1;1	1;1	28S ribosomal protein S2, mitochondrial	MRPS2	;	2	1	1	1	0	0	0	1	1	0	0	0	0	1	1	0	0	0	0	1	1	0	8.1	8.1	8.1	30.479	270	270;296	1	2	0	3.2314	0	0	0	8.1	8.1	0	157980	0	0	0
X6RJY0;Q5TAP6;Q9BVJ6	X6RJY0;Q5TAP6;Q9BVJ6	1;1;1	1;1;1	1;1;1	U3 small nucleolar RNA-associated protein 14 homolog C;U3 small nucleolar RNA-associated protein 14 homolog A	UTP14A;UTP14C	;;	3	1	1	1	1	0	1	0	0	0	1	0	1	0	0	0	1	0	1	0	0	0	4.1	4.1	4.1	36.619	320	320;766;771	1	2	0	2.5582	4.1	0	4.1	0	0	0	316600	165880	0	150710
Q659A1	Q659A1	1	1	1	Little elongation complex subunit 2	ICE2		1	1	1	1	1	1	0	0	0	0	1	1	0	0	0	0	1	1	0	0	0	0	1.2	1.2	1.2	110.01	982	982	1	2	0.0059055	1.8498	1.2	1.2	0	0	0	0	33604	19249	14355	0
Q7KZF4	Q7KZF4	1	1	1	Staphylococcal nuclease domain-containing protein 1	SND1		1	1	1	1	0	0	0	1	1	0	0	0	0	1	1	0	0	0	0	1	1	0	2	2	2	102	910	910	1	2	0.0093633	1.6281	0	0	0	2	2	0	66983	0	0	0
Q7Z6Z7	Q7Z6Z7	2	2	2	E3 ubiquitin-protein ligase HUWE1	HUWE1		1	2	2	2	1	0	0	0	1	0	1	0	0	0	1	0	1	0	0	0	1	0	0.9	0.9	0.9	481.89	4374	4374	1	2	0.0058997	1.8495	0.3	0	0	0	0.5	0	175910	50964	0	0
Q86U38	Q86U38	2	2	2	Nucleolar protein 9	NOP9		1	2	2	2	0	0	0	0	0	2	0	0	0	0	0	2	0	0	0	0	0	2	4.6	4.6	4.6	69.437	636	636	1	2	0	2.9722	0	0	0	0	0	4.6	100780	0	0	0
Q8IYS1	Q8IYS1	1	1	1	Peptidase M20 domain-containing protein 2	PM20D2		1	1	1	1	1	0	0	1	0	0	1	0	0	1	0	0	1	0	0	1	0	0	4.6	4.6	4.6	47.776	436	436	1	2	0.0095057	1.6885	4.6	0	0	4.6	0	0	206470	135870	0	0
Q8N201	Q8N201	2	2	2	Integrator complex subunit 1	INTS1		1	2	2	2	0	0	1	1	0	0	0	0	1	1	0	0	0	0	1	1	0	0	2	2	2	244.29	2190	2190	1	2	0	3.0943	0	0	1.1	0.9	0	0	58996	0	0	38715
Q8N720	Q8N720	1	1	1	Zinc finger protein 655	ZNF655		1	1	1	1	0	0	0	1	1	0	0	0	0	1	1	0	0	0	0	1	1	0	2	2	2	57.406	491	491	1	2	0.0059289	1.8759	0	0	0	2	2	0	115030	0	0	0
Q8WVV4	Q8WVV4	1	1	1	Protein POF1B	POF1B		1	1	1	1	0	0	0	1	0	1	0	0	0	1	0	1	0	0	0	1	0	1	1.7	1.7	1.7	68.064	589	589	1	2	0	2.7693	0	0	0	1.7	0	1.7	611260	0	0	0
Q92769	Q92769	4	1	1	Histone deacetylase 2	HDAC2		1	4	1	1	2	3	4	2	2	1	0	1	1	0	0	0	0	1	1	0	0	0	11.5	3.9	3.9	55.364	488	488	1	2	0	2.3631	5.1	9	11.5	5.1	5.1	2.5	1451800	0	632900	818900
Q969E2	Q969E2	1	1	1	Secretory carrier-associated membrane protein 4	SCAMP4		1	1	1	1	1	0	1	0	0	0	1	0	1	0	0	0	1	0	1	0	0	0	4.8	4.8	4.8	25.728	229	229	1	2	0.0058366	1.7986	4.8	0	4.8	0	0	0	1399600	793520	0	606060
Q969V3;K7EQ66;K7ELZ9;K7ENM2;A0A0C4DGP7;K7EMW4	Q969V3;K7EQ66;K7ELZ9;K7ENM2;A0A0C4DGP7;K7EMW4	2;1;1;1;1;1	2;1;1;1;1;1	2;1;1;1;1;1	Nicalin	NCLN	;;;;;	6	2	2	2	1	1	0	0	0	0	1	1	0	0	0	0	1	1	0	0	0	0	4.1	4.1	4.1	62.974	563	563;110;282;328;350;489	1	2	0	2.7292	1.6	2.5	0	0	0	0	1384100	815400	568680	0
Q96CB8	Q96CB8	1	1	1	Integrator complex subunit 12	INTS12		1	1	1	1	0	1	0	1	0	0	0	1	0	1	0	0	0	1	0	1	0	0	2.8	2.8	2.8	48.807	462	462	1	2	0	3.0791	0	2.8	0	2.8	0	0	519550	0	318850	0
Q96ER3;H0YEK5;E9PMD2;J3KND1;E9PRZ1	Q96ER3;H0YEK5;E9PMD2;J3KND1;E9PRZ1	2;1;1;1;1	2;1;1;1;1	2;1;1;1;1	Protein SAAL1	SAAL1	;;;;	5	2	2	2	0	1	0	1	0	0	0	1	0	1	0	0	0	1	0	1	0	0	7.4	7.4	7.4	53.557	474	474;264;353;473;476	1	2	0.0039683	1.8905	0	2.3	0	5.1	0	0	88294	0	58901	0
Q99714	Q99714	1	1	1	3-hydroxyacyl-CoA dehydrogenase type-2	HSD17B10		1	1	1	1	1	1	0	0	0	0	1	1	0	0	0	0	1	1	0	0	0	0	10	10	10	26.923	261	261	1	2	0.0095238	1.6954	10	10	0	0	0	0	218290	149750	68538	0
Q9BPX5	Q9BPX5	1	1	1	Actin-related protein 2/3 complex subunit 5-like protein	ARPC5L		1	1	1	1	1	1	0	0	0	0	1	1	0	0	0	0	1	1	0	0	0	0	7.8	7.8	7.8	16.941	153	153	1	2	0	3.213	7.8	7.8	0	0	0	0	1031400	602010	429370	0
Q9NZN3;Q9H223;C9JDQ8;C9J2Z4;C9JC03;A0A024R571;Q9H4M9	Q9NZN3;Q9H223;C9JDQ8;C9J2Z4;C9JC03;A0A024R571;Q9H4M9	2;2;1;1;1;1;1	2;2;1;1;1;1;1	2;2;1;1;1;1;1	EH domain-containing protein 3;EH domain-containing protein 4;EH domain-containing protein 1	EHD3;EHD4;EHD1	;;;;;;	7	2	2	2	1	0	0	1	0	0	1	0	0	1	0	0	1	0	0	1	0	0	4.1	4.1	4.1	60.886	535	535;541;162;306;374;548;534	1	2	0	3.3831	2.1	0	0	2.1	0	0	0	0	0	0
Q9HCN4	Q9HCN4	2	2	2	GPN-loop GTPase 1	GPN1		1	2	2	2	1	0	0	1	0	0	1	0	0	1	0	0	1	0	0	1	0	0	6.7	6.7	6.7	41.74	374	374	1	2	0	3.7146	2.9	0	0	3.7	0	0	122030	79882	0	0
Q9NQX4	Q9NQX4	4	2	2	Unconventional myosin-Vc	MYO5C		1	4	2	2	1	2	2	0	0	0	1	0	1	0	0	0	1	0	1	0	0	0	2.8	1.4	1.4	202.81	1742	1742	1	2	0.004065	1.966	0.7	1.4	1.5	0	0	0	2441700	34624	0	2407100
Q9NR97	Q9NR97	2	2	2	Toll-like receptor 8	TLR8		1	2	2	2	1	2	0	0	0	0	1	2	0	0	0	0	1	2	0	0	0	0	2.5	2.5	2.5	119.83	1041	1041	1	3	0.0094073	1.6411	1.2	2.5	0	0	0	0	1798600	1143400	655220	0
Q9P0U3	Q9P0U3	1	1	1	Sentrin-specific protease 1	SENP1		1	1	1	1	0	0	0	1	0	1	0	0	0	1	0	1	0	0	0	1	0	1	1.4	1.4	1.4	73.48	644	644	1	2	0.0067502	1.7691	0	0	0	1.4	0	1.4	1513800	0	0	0
Q9UBD5	Q9UBD5	2	2	2	Origin recognition complex subunit 3	ORC3		1	2	2	2	0	0	0	1	0	1	0	0	0	1	0	1	0	0	0	1	0	1	4.5	4.5	4.5	82.253	711	711	1	2	0.0010753	2.3048	0	0	0	2.8	0	1.7	72322	0	0	0
Q9UKT7	Q9UKT7	1	1	1	F-box/LRR-repeat protein 3	FBXL3		1	1	1	1	0	0	0	1	1	0	0	0	0	1	1	0	0	0	0	1	1	0	2.3	2.3	2.3	48.707	428	428	1	2	0.0040692	1.9702	0	0	0	2.3	2.3	0	41802	0	0	0
Q9UNX4	Q9UNX4	1	1	1	WD repeat-containing protein 3	WDR3		1	1	1	1	1	1	0	0	0	0	1	1	0	0	0	0	1	1	0	0	0	0	1.1	1.1	1.1	106.1	943	943	1	2	0	2.4551	1.1	1.1	0	0	0	0	354360	221130	133230	0
Q9UP83	Q9UP83	1	1	1	Conserved oligomeric Golgi complex subunit 5	COG5		1	1	1	1	0	0	1	0	0	0	0	0	1	0	0	0	0	0	1	0	0	0	1.7	1.7	1.7	92.742	839	839	1	1	0	2.3196	0	0	1.7	0	0	0	137430	0	0	137430
REV__Q7Z745	REV__Q7Z745	1	1	1				1	1	1	1	0	1	0	0	0	1	0	1	0	0	0	1	0	1	0	0	0	1	0	0	0	180.78	1585	1585	1	2	0.0010787	2.3119	0	0	0	0	0	0	1601800	0	976420	0
A0A087WU03	A0A087WU03	1	1	1		HNRNPDL		1	1	1	1	0	0	1	0	0	0	0	0	1	0	0	0	0	0	1	0	0	0	26.3	26.3	26.3	6.7215	57	57	1	1	1	-2	0	0	26.3	0	0	0	930370	0	0	930370
H7C378;A0A087WW66;Q99460	H7C378;A0A087WW66;Q99460	1;1;1	1;1;1	1;1;1	26S proteasome non-ATPase regulatory subunit 1	PSMD1	;;	3	1	1	1	0	0	1	0	0	0	0	0	1	0	0	0	0	0	1	0	0	0	6.2	6.2	6.2	20.317	192	192;953;953	1	1	0.001056	2.1565	0	0	6.2	0	0	0	83421	0	0	83421
A0A087WYC0;A0A0C4DGS5;Q08379	A0A087WYC0;A0A0C4DGS5;Q08379	1;1;1	1;1;1	1;1;1	Golgin subfamily A member 2	GOLGA2	;;	3	1	1	1	0	1	0	0	0	0	0	1	0	0	0	0	0	1	0	0	0	0	3.5	3.5	3.5	31.894	286	286;990;1002	1	1	0.004012	1.9231	0	3.5	0	0	0	0	0	0	0	0
A0A087X2D0;P84103	A0A087X2D0;P84103	1;1	1;1	1;1	Serine/arginine-rich splicing factor 3	SRSF3	;	2	1	1	1	0	0	0	1	0	0	0	0	0	1	0	0	0	0	0	1	0	0	9.5	9.5	9.5	10.32	95	95;164	1	1	0.003996	1.9045	0	0	0	9.5	0	0	370810	0	0	0
Q5T3T0;Q5T3T1;F2Z357;A0A0A0MQY8;X6R8W7;P47736	Q5T3T0;Q5T3T1;F2Z357;A0A0A0MQY8;X6R8W7;P47736	1;1;1;1;1;1	1;1;1;1;1;1	1;1;1;1;1;1	Rap1 GTPase-activating protein 1	RAP1GAP	;;;;;	6	1	1	1	0	0	0	1	0	0	0	0	0	1	0	0	0	0	0	1	0	0	40	40	40	4.1697	35	35;96;602;692;748;663	1	1	1	-2	0	0	0	40	0	0	2286100	0	0	0
A0A0C4DFW4;Q5JUR7	A0A0C4DFW4;Q5JUR7	1;1	1;1	1;1	Testis-expressed sequence 30 protein	TEX30	;	2	1	1	1	1	0	0	0	0	0	1	0	0	0	0	0	1	0	0	0	0	0	9.7	9.7	9.7	21.22	186	186;227	1	1	1	-2	9.7	0	0	0	0	0	96817000	96817000	0	0
A0A0C4DG38;Q9NXR8	A0A0C4DG38;Q9NXR8	1;1	1;1	1;1	Inhibitor of growth protein 3	ING3	;	2	1	1	1	0	0	0	0	0	1	0	0	0	0	0	1	0	0	0	0	0	1	19.2	19.2	19.2	11.969	99	99;418	1	1	1	-2	0	0	0	0	0	19.2	3380200	0	0	0
F5GWX5;A0A0C4DGG9;Q14839;Q12873	F5GWX5;A0A0C4DGG9;Q14839;Q12873	1;1;1;1	1;1;1;1	1;1;1;1	Chromodomain-helicase-DNA-binding protein 4;Chromodomain-helicase-DNA-binding protein 3	CHD4;CHD3	;;;	4	1	1	1	0	0	1	0	0	0	0	0	1	0	0	0	0	0	1	0	0	0	0.9	0.9	0.9	217.1	1905	1905;1937;1912;2000	1	1	0.0040942	1.988	0	0	0.9	0	0	0	83797	0	0	83797
A0A0D9SFK2;Q92614	A0A0D9SFK2;Q92614	1;1	1;1	1;1	Unconventional myosin-XVIIIa	MYO18A	;	2	1	1	1	0	0	0	1	0	0	0	0	0	1	0	0	0	0	0	1	0	0	0.7	0.7	0.7	231.1	2038	2038;2054	1	1	1	-2	0	0	0	0.7	0	0	410590	0	0	0
A0A1B0GUF7;A0A1B0GVH7	A0A1B0GUF7;A0A1B0GVH7	1;1	1;1	1;1			;	2	1	1	1	0	1	0	0	0	0	0	1	0	0	0	0	0	1	0	0	0	0	2.7	2.7	2.7	57.282	481	481;501	1	1	1	-2	0	2.7	0	0	0	0	2349000	0	2349000	0
F6WST4;A0A1B0GXE7;Q9P0S3;Q53FV1	F6WST4;A0A1B0GXE7;Q9P0S3;Q53FV1	1;1;1;1	1;1;1;1	1;1;1;1	ORM1-like protein 1;ORM1-like protein 2	ORMDL1;ORMDL2	;;;	4	1	1	1	0	0	1	0	0	0	0	0	1	0	0	0	0	0	1	0	0	0	13.9	13.9	13.9	12.157	108	108;109;153;153	1	1	0.003125	2.0731	0	0	13.9	0	0	0	0	0	0	0
F8WEZ4;Q96CU4;B7Z2T3;B7Z6R6;A0AVF1	F8WEZ4;Q96CU4;B7Z2T3;B7Z6R6;A0AVF1	1;1;1;1;1	1;1;1;1;1	1;1;1;1;1	Intraflagellar transport protein 56	TTC26	;;;;	5	1	1	1	0	1	0	0	0	0	0	1	0	0	0	0	0	1	0	0	0	0	8.9	8.9	8.9	15.683	135	135;271;423;447;554	1	1	0.0030801	2.004	0	8.9	0	0	0	0	96403	0	96403	0
M0R1B5;E9PL44;E9PJS0;M0R026;A1L0T0	M0R1B5;E9PL44;E9PJS0;M0R026;A1L0T0	1;1;1;1;1	1;1;1;1;1	1;1;1;1;1	Acetolactate synthase-like protein	ILVBL	;;;;	5	1	1	1	0	1	0	0	0	0	0	1	0	0	0	0	0	1	0	0	0	0	13.9	13.9	13.9	17.494	165	165;166;262;525;632	1	1	0.002103	2.1335	0	13.9	0	0	0	0	55847	0	55847	0
A2A2Q9;Q9Y312	A2A2Q9;Q9Y312	1;1	1;1	1;1	Protein AAR2 homolog	AAR2	;	2	1	1	1	0	1	0	0	0	0	0	1	0	0	0	0	0	1	0	0	0	0	3.8	3.8	3.8	45.034	398	398;384	1	1	0	3.0843	0	3.8	0	0	0	0	322310	0	322310	0
A4FU28;Q8IX94;Q86UF2;P0CG41;A4D2H0	A4FU28;Q8IX94;Q86UF2;P0CG41;A4D2H0	2;1;1;1;1	2;1;1;1;1	2;1;1;1;1	cTAGE family member 9;cTAGE family member 4;cTAGE family member 6;cTAGE family member 8;cTAGE family member 15	CTAGE9;CTAGE4;CTAGE6;CTAGE8;CTAGE15	;;;;	5	2	2	2	1	0	0	0	1	0	1	0	0	0	1	0	1	0	0	0	1	0	3	3	3	87.952	777	777;777;777;777;777	1	2	1	-2	1.5	0	0	0	1.4	0	2118400	0	0	0
B0QY11;B7ZB84;B7ZB85	B0QY11;B7ZB84;B7ZB85	1;1;1	1;1;1	1;1;1		LARGE	;;	3	1	1	1	0	0	1	0	0	0	0	0	1	0	0	0	0	0	1	0	0	0	10.9	10.9	10.9	21.506	183	183;276;325	1	1	1	-2	0	0	10.9	0	0	0	28664000	0	0	28664000
B2REB0;H0Y6M8;Q9NZJ4	B2REB0;H0Y6M8;Q9NZJ4	1;1;1	1;1;1	1;1;1	Sacsin	SACS	;;	3	1	1	1	0	0	0	0	1	0	0	0	0	0	1	0	0	0	0	0	1	0	2.9	2.9	2.9	41.605	374	374;732;4579	1	1	0.0058083	1.777	0	0	0	0	2.9	0	177200	0	0	0
K7EMD0;K7EPX6;K7EKR3;B3KQ25;K7ESG5;P61289	K7EMD0;K7EPX6;K7EKR3;B3KQ25;K7ESG5;P61289	1;1;1;1;1;1	1;1;1;1;1;1	1;1;1;1;1;1	Proteasome activator complex subunit 3	PSME3	;;;;;	6	1	1	1	0	0	0	0	1	0	0	0	0	0	1	0	0	0	0	0	1	0	9.4	9.4	9.4	10.935	96	96;110;118;193;198;254	1	1	0.0021008	2.1307	0	0	0	0	9.4	0	63163	0	0	0
C9J7Y4;Q8WWK9	C9J7Y4;Q8WWK9	1;1	1;1	1;1	Cytoskeleton-associated protein 2	CKAP2	;	2	1	1	1	1	0	0	0	0	0	1	0	0	0	0	0	1	0	0	0	0	0	13.4	13.4	13.4	10.865	97	97;683	1	1	0.0086042	1.7105	13.4	0	0	0	0	0	0	0	0	0
H7BZL0;C9J808;Q9BYG3	H7BZL0;C9J808;Q9BYG3	1;1;1	1;1;1	1;1;1	MKI67 FHA domain-interacting nucleolar phosphoprotein	NIFK	;;	3	1	1	1	1	0	0	0	0	0	1	0	0	0	0	0	1	0	0	0	0	0	9.8	9.8	9.8	11.741	102	102;164;293	1	1	0.0059113	1.8536	9.8	0	0	0	0	0	0	0	0	0
C9JQN7;P55884	C9JQN7;P55884	1;1	1;1	1;1	Eukaryotic translation initiation factor 3 subunit B	EIF3B	;	2	1	1	1	1	0	0	0	0	0	1	0	0	0	0	0	1	0	0	0	0	0	18.3	18.3	18.3	18.077	153	153;814	1	1	0.0058824	1.8313	18.3	0	0	0	0	0	94273	94273	0	0
C9JYQ9;H0Y8C2;Q6P5R6	C9JYQ9;H0Y8C2;Q6P5R6	1;1;1	1;1;1	1;1;1	60S ribosomal protein L22-like 1	RPL22L1	;;	3	1	1	1	0	0	1	0	0	0	0	0	1	0	0	0	0	0	1	0	0	0	19.8	19.8	19.8	14.478	121	121;142;122	1	1	0	3.8771	0	0	19.8	0	0	0	473930	0	0	473930
CON__Q01546	CON__Q01546	10	1	1				1	10	1	1	7	4	5	8	10	7	0	0	0	0	1	0	0	0	0	0	1	0	10	1.4	1.4	65.87	638	638	1	1	0.0086124	1.72	7.2	5.6	5.6	8.5	10	8	444330	0	0	0
CON__Q5XKE5;Q5XKE5	CON__Q5XKE5;Q5XKE5	10;10	1;1	0;0	Keratin, type II cytoskeletal 79	KRT79	;	2	10	1	0	8	6	6	9	10	7	0	0	0	0	1	0	0	0	0	0	0	0	14.4	1.9	0	57.809	535	535;535	1	1	1	-2	12.3	10.5	10.5	12.5	14.4	11.8	456830	0	0	0
D6RDZ3	D6RDZ3	1	1	1		SRPK1		1	1	1	1	0	0	0	0	1	0	0	0	0	0	1	0	0	0	0	0	1	0	13.2	13.2	13.2	8.7545	76	76	1	1	1	-2	0	0	0	0	13.2	0	1453700	0	0	0
J3QR88;J3QLK9;J3QL23;J3QL32;J3QL24;J3QKT4;J3KQ22;E2QRB3;P32322	J3QR88;J3QLK9;J3QL23;J3QL32;J3QL24;J3QKT4;J3KQ22;E2QRB3;P32322	1;1;1;1;1;1;1;1;1	1;1;1;1;1;1;1;1;1	1;1;1;1;1;1;1;1;1	Pyrroline-5-carboxylate reductase;Pyrroline-5-carboxylate reductase 1, mitochondrial	PYCR1	;;;;;;;;	9	1	1	1	0	0	0	1	0	0	0	0	0	1	0	0	0	0	0	1	0	0	13.6	13.6	13.6	13.491	132	132;165;173;217;225;242;253;288;319	1	1	0	2.7303	0	0	0	13.6	0	0	212310	0	0	0
E7ERW7;Q92608	E7ERW7;Q92608	1;1	1;1	1;1	Dedicator of cytokinesis protein 2	DOCK2	;	2	1	1	1	0	0	0	0	1	0	0	0	0	0	1	0	0	0	0	0	1	0	0.6	0.6	0.6	153.37	1322	1322;1830	1	1	0.0031217	2.0726	0	0	0	0	0.6	0	387060	0	0	0
E7EVG6;Q5VV67	E7EVG6;Q5VV67	1;1	1;1	1;1	Peroxisome proliferator-activated receptor gamma coactivator-related protein 1	PPRC1	;	2	1	1	1	0	0	0	0	1	0	0	0	0	0	1	0	0	0	0	0	1	0	0.7	0.7	0.7	149.19	1400	1400;1664	1	1	0.0040161	1.9253	0	0	0	0	0.7	0	640230	0	0	0
F8W1N5;F8VZJ2;F8VNW4;F8W0W4;H0YHX9;Q13765;E9PAV3	F8W1N5;F8VZJ2;F8VNW4;F8W0W4;H0YHX9;Q13765;E9PAV3	1;1;1;1;1;1;1	1;1;1;1;1;1;1	1;1;1;1;1;1;1	Nascent polypeptide-associated complex subunit alpha;Nascent polypeptide-associated complex subunit alpha, muscle-specific form	NACA	;;;;;;	7	1	1	1	0	0	0	0	1	0	0	0	0	0	1	0	0	0	0	0	1	0	21.1	21.1	21.1	7.813	71	71;136;148;198;213;215;2078	1	1	0	12.594	0	0	0	0	21.1	0	0	0	0	0
E9PL37;E9PRM1;P07384	E9PL37;E9PRM1;P07384	1;1;1	1;1;1	1;1;1	Calpain-1 catalytic subunit	CAPN1	;;	3	1	1	1	0	0	0	0	0	1	0	0	0	0	0	1	0	0	0	0	0	1	9.9	9.9	9.9	21.073	191	191;201;714	1	1	0.0076775	1.7296	0	0	0	0	0	9.9	447530	0	0	0
H0YGG4;F5H0D0;Q14232	H0YGG4;F5H0D0;Q14232	1;1;1	1;1;1	1;1;1	Translation initiation factor eIF-2B subunit alpha	EIF2B1	;;	3	1	1	1	1	0	0	0	0	0	1	0	0	0	0	0	1	0	0	0	0	0	9.2	9.2	9.2	16.816	152	152;202;305	1	1	0	2.6856	9.2	0	0	0	0	0	550880	550880	0	0
F5H0N7;J3KP58;P30622	F5H0N7;J3KP58;P30622	2;2;2	2;2;2	2;2;2	CAP-Gly domain-containing linker protein 1	CLIP1	;;	3	2	2	2	0	0	0	0	2	0	0	0	0	0	2	0	0	0	0	0	2	0	2.8	2.8	2.8	116.25	1013	1013;1316;1438	1	2	0.0040609	1.9653	0	0	0	0	2.8	0	11800000	0	0	0
G3V5X8;G3V4Q2;G3V4V1;G3V1W4;G3V3G5;G3V2R6;F5H365;Q15436	G3V5X8;G3V4Q2;G3V4V1;G3V1W4;G3V3G5;G3V2R6;F5H365;Q15436	1;1;1;1;1;1;1;1	1;1;1;1;1;1;1;1	1;1;1;1;1;1;1;1	Protein transport protein Sec23A	SEC23A	;;;;;;;	8	1	1	1	1	0	0	0	0	0	1	0	0	0	0	0	1	0	0	0	0	0	15.3	15.3	15.3	9.9684	85	85;86;93;108;140;169;736;765	1	1	0.0067698	1.7741	15.3	0	0	0	0	0	129500	129500	0	0
F5H459;Q92572	F5H459;Q92572	1;1	1;1	1;1	AP-3 complex subunit sigma-1	AP3S1	;	2	1	1	1	0	0	1	0	0	0	0	0	1	0	0	0	0	0	1	0	0	0	8	8	8	18.771	162	162;193	1	1	1	-2	0	0	8	0	0	0	0	0	0	0
F5H4N4;Q9NR77	F5H4N4;Q9NR77	1;1	1;1	1;1	Peroxisomal membrane protein 2	PXMP2	;	2	1	1	1	0	0	1	0	0	0	0	0	1	0	0	0	0	0	1	0	0	0	6.2	6.2	6.2	17.555	160	160;195	1	1	0.0058252	1.7853	0	0	6.2	0	0	0	100850	0	0	100850
H0YDP6;H0YEL0;O14893	H0YDP6;H0YEL0;O14893	1;1;1	1;1;1	1;1;1	Gem-associated protein 2	GEMIN2	;;	3	1	1	1	1	0	0	0	0	0	1	0	0	0	0	0	1	0	0	0	0	0	6.1	6.1	6.1	21.918	197	197;220;280	1	1	0.0039801	1.8961	6.1	0	0	0	0	0	755720	755720	0	0
H7C218;H7C0X5;Q9H3G5	H7C218;H7C0X5;Q9H3G5	1;1;1	1;1;1	1;1;1	Probable serine carboxypeptidase CPVL	CPVL	;;	3	1	1	1	0	0	0	0	1	0	0	0	0	0	1	0	0	0	0	0	1	0	7.1	7.1	7.1	16.486	141	141;180;476	1	1	0	3.3465	0	0	0	0	7.1	0	0	0	0	0
H7C1X9;Q9H9A5	H7C1X9;Q9H9A5	1;1	1;1	1;1	CCR4-NOT transcription complex subunit 10	CNOT10	;	2	1	1	1	0	1	0	0	0	0	0	1	0	0	0	0	0	1	0	0	0	0	5.7	5.7	5.7	23.718	210	210;744	1	1	0.0010741	2.303	0	5.7	0	0	0	0	109950	0	109950	0
H7C3U4;O75592	H7C3U4;O75592	1;1	1;1	1;1	E3 ubiquitin-protein ligase MYCBP2	MYCBP2	;	2	1	1	1	0	1	0	0	0	0	0	1	0	0	0	0	0	1	0	0	0	0	1	1	1	117.79	1061	1061;4640	1	1	0.0058594	1.8209	0	1	0	0	0	0	0	0	0	0
M0QYH6;M0QY25;Q86YD1	M0QYH6;M0QY25;Q86YD1	1;1;1	1;1;1	1;1;1	Prostate tumor-overexpressed gene 1 protein	PTOV1	;;	3	1	1	1	0	0	0	0	1	0	0	0	0	0	1	0	0	0	0	0	1	0	9.9	9.9	9.9	13.16	111	111;384;416	1	1	0	3.1713	0	0	0	0	9.9	0	292870	0	0	0
O00232	O00232	1	1	1	26S proteasome non-ATPase regulatory subunit 12	PSMD12		1	1	1	1	0	0	1	0	0	0	0	0	1	0	0	0	0	0	1	0	0	0	2.9	2.9	2.9	52.904	456	456	1	1	0.0093897	1.6402	0	0	2.9	0	0	0	136980	0	0	136980
O15066	O15066	1	1	1	Kinesin-like protein KIF3B;Kinesin-like protein KIF3B, N-terminally processed	KIF3B		1	1	1	1	0	0	0	1	0	0	0	0	0	1	0	0	0	0	0	1	0	0	1.5	1.5	1.5	85.124	747	747	1	1	1	-2	0	0	0	1.5	0	0	531810	0	0	0
O43303	O43303	2	2	2	Centriolar coiled-coil protein of 110 kDa	CCP110		1	2	2	2	0	0	0	0	1	1	0	0	0	0	1	1	0	0	0	0	1	1	3.9	3.9	3.9	113.42	1012	1012	1	2	0.0058881	1.8421	0	0	0	0	2.1	1.8	103830	0	0	0
O43819	O43819	1	1	1	Protein SCO2 homolog, mitochondrial	SCO2		1	1	1	1	0	0	0	1	0	0	0	0	0	1	0	0	0	0	0	1	0	0	6.8	6.8	6.8	29.81	266	266	1	1	0	3.8814	0	0	0	6.8	0	0	0	0	0	0
O43896;A0A1B0GTU3;A0A1B0GUA8;Q96L93;Q9H1H9;Q9P2P6	O43896	3;1;1;1;1;1	1;1;1;1;1;1	0;0;0;0;0;0	Kinesin-like protein KIF1C	KIF1C		6	3	1	0	0	0	0	3	2	1	0	0	0	1	0	0	0	0	0	0	0	0	3.1	0.8	0	122.95	1103	1103;1266;1845;1317;1805;4700	1	1	0.0020921	2.1079	0	0	0	3.1	2.3	1.1	0	0	0	0
O60826	O60826	1	1	1	Coiled-coil domain-containing protein 22	CCDC22		1	1	1	1	0	1	0	0	0	0	0	1	0	0	0	0	0	1	0	0	0	0	1.4	1.4	1.4	70.755	627	627	1	1	0.0093985	1.6406	0	1.4	0	0	0	0	0	0	0	0
O75419	O75419	1	1	1	Cell division control protein 45 homolog	CDC45		1	1	1	1	1	0	0	0	0	0	1	0	0	0	0	0	1	0	0	0	0	0	1.8	1.8	1.8	65.568	566	566	1	1	0.0040241	1.9356	1.8	0	0	0	0	0	658260	658260	0	0
O95073	O95073	1	1	1	Fibrinogen silencer-binding protein	FSBP		1	1	1	1	1	0	0	0	0	0	1	0	0	0	0	0	1	0	0	0	0	0	4.7	4.7	4.7	34.767	299	299	1	1	1	-2	4.7	0	0	0	0	0	293460	293460	0	0
O95235	O95235	1	1	1	Kinesin-like protein KIF20A	KIF20A		1	1	1	1	0	0	0	1	0	0	0	0	0	1	0	0	0	0	0	1	0	0	1.2	1.2	1.2	100.28	890	890	1	1	1	-2	0	0	0	1.2	0	0	1699300	0	0	0
P06753;K7EQW8	P06753	14;1	1;1	1;1	Tropomyosin alpha-3 chain	TPM3		2	14	1	1	13	13	13	0	0	1	0	0	1	0	0	0	0	0	1	0	0	0	39.6	4.6	4.6	32.95	285	285;59	1	1	0.003112	2.0601	35.1	35.1	35.1	0	0	3.5	334370	0	0	334370
P50748	P50748	2	2	2	Kinetochore-associated protein 1	KNTC1		1	2	2	2	1	0	0	0	1	0	1	0	0	0	1	0	1	0	0	0	1	0	1	1	1	250.75	2209	2209	1	2	0.005923	1.8665	0.5	0	0	0	0.6	0	197290	197290	0	0
P55735	P55735	1	1	1	Protein SEC13 homolog	SEC13		1	1	1	1	1	0	0	0	0	0	1	0	0	0	0	0	1	0	0	0	0	0	8.1	8.1	8.1	35.54	322	322	1	1	0	5.2928	8.1	0	0	0	0	0	2218100	2218100	0	0
P61026	P61026	2	1	1	Ras-related protein Rab-10	RAB10		1	2	1	1	1	1	2	1	1	1	0	0	1	0	0	0	0	0	1	0	0	0	11	5.5	5.5	22.541	200	200	1	1	0.0031153	2.0677	5.5	5.5	11	5.5	5.5	5.5	101040	0	0	101040
Q13535	Q13535	2	2	2	Serine/threonine-protein kinase ATR	ATR		1	2	2	2	1	0	0	0	1	0	1	0	0	0	1	0	1	0	0	0	1	0	1.1	1.1	1.1	301.36	2644	2644	1	2	0.0058708	1.8272	0.5	0	0	0	0.6	0	61174	61174	0	0
Q13724;C9JDQ1;C9J8D4	Q13724;C9JDQ1;C9J8D4	2;1;1	2;1;1	2;1;1	Mannosyl-oligosaccharide glucosidase	MOGS	;;	3	2	2	2	0	0	1	0	0	1	0	0	1	0	0	1	0	0	1	0	0	1	3.2	3.2	3.2	91.916	837	837;145;491	1	2	0	2.5919	0	0	1.8	0	0	1.4	148470	0	0	0
Q14331;E9PI42;E9PRR7	Q14331;E9PI42;E9PRR7	2;1;1	2;1;1	2;1;1	Protein FRG1	FRG1	;;	3	2	2	2	0	1	1	0	0	0	0	1	1	0	0	0	0	1	1	0	0	0	8.9	8.9	8.9	29.172	258	258;42;116	1	2	0	2.7189	0	5	3.9	0	0	0	0	0	0	0
Q14588	Q14588	1	1	1	Zinc finger protein 234	ZNF234		1	1	1	1	0	0	0	1	0	0	0	0	0	1	0	0	0	0	0	1	0	0	1.1	1.1	1.1	80.559	700	700	1	1	0.0085796	1.7017	0	0	0	1.1	0	0	34215000	0	0	0
Q15637	Q15637	1	1	1	Splicing factor 1	SF1		1	1	1	1	0	0	1	0	0	0	0	0	1	0	0	0	0	0	1	0	0	0	3.3	3.3	3.3	68.329	639	639	1	1	0.0049554	1.8881	0	0	3.3	0	0	0	107030	0	0	107030
Q5T6H3;Q5T6H2;Q5T6H7;Q9NQW7	Q5T6H3;Q5T6H2;Q5T6H7;Q9NQW7	1;1;1;1	1;1;1;1	1;1;1;1	Xaa-Pro aminopeptidase 1	XPNPEP1	;;;	4	1	1	1	1	0	0	0	0	0	1	0	0	0	0	0	1	0	0	0	0	0	9.4	9.4	9.4	26.319	233	233;303;552;623	1	1	1	-2	9.4	0	0	0	0	0	1292100	1292100	0	0
Q5VUA4	Q5VUA4	1	1	1	Zinc finger protein 318	ZNF318		1	1	1	1	0	0	0	1	0	0	0	0	0	1	0	0	0	0	0	1	0	0	0.5	0.5	0.5	251.11	2279	2279	1	1	0.0094697	1.6669	0	0	0	0.5	0	0	301500	0	0	0
Q6IB77	Q6IB77	1	1	1	Glycine N-acyltransferase	GLYAT		1	1	1	1	0	0	0	0	0	1	0	0	0	0	0	1	0	0	0	0	0	1	5.1	5.1	5.1	33.924	296	296	1	1	1	-2	0	0	0	0	0	5.1	1422900	0	0	0
Q9UDT1;Q6NTF9	Q9UDT1;Q6NTF9	1;1	1;1	1;1	Rhomboid domain-containing protein 2	WUGSC:H_RG122E10.2a;RHBDD2	;	2	1	1	1	0	0	0	0	1	0	0	0	0	0	1	0	0	0	0	0	1	0	20.3	20.3	20.3	8.3796	79	79;364	1	1	0	2.6107	0	0	0	0	20.3	0	286050	0	0	0
Q6ZSM3	Q6ZSM3	1	1	1	Monocarboxylate transporter 12	SLC16A12		1	1	1	1	1	0	0	0	0	0	1	0	0	0	0	0	1	0	0	0	0	0	1.6	1.6	1.6	53.074	486	486	1	1	1	-2	1.6	0	0	0	0	0	888670	888670	0	0
Q7RTS5	Q7RTS5	1	1	1	Otopetrin-3	OTOP3		1	1	1	1	1	0	0	0	0	0	1	0	0	0	0	0	1	0	0	0	0	0	2.2	2.2	2.2	66.295	596	596	1	1	1	-2	2.2	0	0	0	0	0	276610	276610	0	0
Q7Z2T5	Q7Z2T5	1	1	1	TRMT1-like protein	TRMT1L		1	1	1	1	0	1	0	0	0	0	0	1	0	0	0	0	0	1	0	0	0	0	3	3	3	81.746	733	733	1	1	0	2.6721	0	3	0	0	0	0	64216	0	64216	0
Q8WXI7	Q8WXI7	2	2	2	Mucin-16	MUC16		1	2	2	2	0	0	0	1	1	0	0	0	0	1	1	0	0	0	0	1	1	0	0.4	0.4	0.4	1519.2	14507	14507	1	2	1	-2	0	0	0	0.2	0.2	0	54073	0	0	0
Q969Q0	Q969Q0	5	1	1	60S ribosomal protein L36a-like	RPL36AL		1	5	1	1	3	3	3	2	4	4	0	0	0	0	0	1	0	0	0	0	0	1	36.8	9.4	9.4	12.469	106	106	1	1	0	2.8132	26.4	26.4	26.4	19.8	27.4	35.8	0	0	0	0
Q99698;A0A0A0MRZ6	Q99698;A0A0A0MRZ6	2;1	2;1	2;1	Lysosomal-trafficking regulator	LYST	;	2	2	2	2	0	0	0	2	0	0	0	0	0	2	0	0	0	0	0	2	0	0	0.8	0.8	0.8	429.13	3801	3801;1382	1	2	1	-2	0	0	0	0.8	0	0	451280	0	0	0
Q99956	Q99956	1	1	1	Dual specificity protein phosphatase 9	DUSP9		1	1	1	1	0	1	0	0	0	0	0	1	0	0	0	0	0	1	0	0	0	0	3.9	3.9	3.9	41.867	384	384	1	1	0	2.3896	0	3.9	0	0	0	0	98322	0	98322	0
Q9BUB7	Q9BUB7	1	1	1	Transmembrane protein 70, mitochondrial	TMEM70		1	1	1	1	0	0	1	0	0	0	0	0	1	0	0	0	0	0	1	0	0	0	3.5	3.5	3.5	28.969	260	260	1	1	0.0067633	1.7714	0	0	3.5	0	0	0	1655600	0	0	1655600
Q9H307	Q9H307	1	1	1	Pinin	PNN		1	1	1	1	1	0	0	0	0	0	1	0	0	0	0	0	1	0	0	0	0	0	1.5	1.5	1.5	81.613	717	717	1	1	0.0040816	1.9831	1.5	0	0	0	0	0	0	0	0	0
Q9H840	Q9H840	1	1	1	Gem-associated protein 7	GEMIN7		1	1	1	1	1	0	0	0	0	0	1	0	0	0	0	0	1	0	0	0	0	0	14.5	14.5	14.5	14.536	131	131	1	1	0	2.3964	14.5	0	0	0	0	0	378180	378180	0	0
Q9HA92	Q9HA92	1	1	1	Radical S-adenosyl methionine domain-containing protein 1, mitochondrial	RSAD1		1	1	1	1	0	0	0	0	0	1	0	0	0	0	0	1	0	0	0	0	0	1	2.9	2.9	2.9	48.713	442	442	1	1	0.0094967	1.6794	0	0	0	0	0	2.9	17186	0	0	0
Q9NSD9	Q9NSD9	1	1	1	Phenylalanine--tRNA ligase beta subunit	FARSB		1	1	1	1	1	0	0	0	0	0	1	0	0	0	0	0	1	0	0	0	0	0	1.5	1.5	1.5	66.115	589	589	1	1	0.005814	1.7781	1.5	0	0	0	0	0	174450	174450	0	0
Q9UGJ1;H3BQ12;H3BN56;H3BS59	Q9UGJ1;H3BQ12;H3BN56;H3BS59	2;1;1;1	2;1;1;1	2;1;1;1	Gamma-tubulin complex component 4	TUBGCP4	;;;	4	2	2	2	1	1	0	0	0	0	1	1	0	0	0	0	1	1	0	0	0	0	2.5	2.5	2.5	76.088	667	667;66;82;105	1	2	0	2.8516	1	1.5	0	0	0	0	0	0	0	0
Q9Y289	Q9Y289	1	1	1	Sodium-dependent multivitamin transporter	SLC5A6		1	1	1	1	0	0	0	1	0	0	0	0	0	1	0	0	0	0	0	1	0	0	2	2	2	68.641	635	635	1	1	0.0094429	1.6607	0	0	0	2	0	0	848910	0	0	0
Q9Y678	Q9Y678	2	1	1	Coatomer subunit gamma-1	COPG1		1	2	1	1	1	1	2	1	1	1	0	0	1	0	0	0	0	0	1	0	0	0	3.3	1.9	1.9	97.717	874	874	1	1	0.0040984	1.994	1.4	1.4	3.3	1.4	1.4	1.4	81591	0	0	81591
REV__D6RGD1;REV__Q9HD67;REV__A0A0A0MQX1	REV__D6RGD1;REV__Q9HD67;REV__A0A0A0MQX1	1;1;1	1;1;1	1;1;1			;;	3	1	1	1	0	0	1	0	0	0	0	0	1	0	0	0	0	0	1	0	0	0	0	0	0	96.122	830	830;2058;2069	1	1	1	-2	0	0	0	0	0	0	1736900	0	0	1736900
REV__H7BZW9;REV__B7Z863;REV__B7Z964;REV__H7C3M8;REV__H7BZK0;REV__Q14BN4	REV__H7BZW9;REV__B7Z863;REV__B7Z964;REV__H7C3M8;REV__H7BZK0;REV__Q14BN4	1;1;1;1;1;1	1;1;1;1;1;1	1;1;1;1;1;1			;;;;;	6	1	1	1	0	0	0	1	0	0	0	0	0	1	0	0	0	0	0	1	0	0	0	0	0	36.26	316	316;318;362;409;433;828	1	1	0.0086372	1.7262	0	0	0	0	0	0	222530000	0	0	0
REV__O75165	REV__O75165	1	1	1				1	1	1	1	0	0	1	0	0	0	0	0	1	0	0	0	0	0	1	0	0	0	0	0	0	254.41	2243	2243	1	1	0.0031381	2.1047	0	0	0	0	0	0	402610	0	0	402610
REV__P23458	REV__P23458	1	1	1				1	1	1	1	0	0	1	0	0	0	0	0	1	0	0	0	0	0	1	0	0	0	0	0	0	133.28	1154	1154	1	1	0.0067764	1.7764	0	0	0	0	0	0	5397600	0	0	5397600
REV__Q13029	REV__Q13029	1	1	1				1	1	1	1	0	0	1	0	0	0	0	0	1	0	0	0	0	0	1	0	0	0	0	0	0	188.91	1718	1718	1	1	0.0059465	1.8817	0	0	0	0	0	0	952170	0	0	952170
A0A024QZX5;A0A087X1N8;P35237	A0A024QZX5;A0A087X1N8;P35237	1;1;1	1;1;1	1;1;1	Serpin B6	SERPINB6	;;	3	1	1	1	0	0	0	0	1	0	0	0	0	0	1	0	0	0	0	0	1	0	4.7	4.7	4.7	43.024	380	380;395;376	1	1	1	-2	0	0	0	0	4.7	0	0	0	0	0
F8WF22;A0A024R341;Q6I9Y2	F8WF22;A0A024R341;Q6I9Y2	1;1;1	1;1;1	1;1;1	THO complex subunit 7 homolog	THOC7;NIF3L1BP1	;;	3	1	1	1	0	0	1	0	0	0	0	0	1	0	0	0	0	0	1	0	0	0	33.3	33.3	33.3	7.0022	60	60;152;204	1	1	1	-2	0	0	33.3	0	0	0	0	0	0	0
A0A075B718;H0YN34;C4B7M2;Q96JI7	A0A075B718;H0YN34;C4B7M2;Q96JI7	1;1;1;1	1;1;1;1	1;1;1;1	Spatacsin	SPG11	;;;	4	1	1	1	0	1	0	0	0	0	0	1	0	0	0	0	0	1	0	0	0	0	13.5	13.5	13.5	17.816	156	156;779;2265;2443	1	1	1	-2	0	13.5	0	0	0	0	0	0	0	0
A0A087WSX5;Q5EBL2	A0A087WSX5;Q5EBL2	1;1	1;1	1;1	Zinc finger protein 628	ZNF628	;	2	1	1	1	0	0	0	1	0	0	0	0	0	1	0	0	0	0	0	1	0	0	1.6	1.6	1.6	110.76	1058	1058;1059	1	1	1	-2	0	0	0	1.6	0	0	0	0	0	0
H0YG78;A0A0H2UH41;A0A087X187;A0A087WTB9;Q6S5H5;A6NI47;Q6S545	H0YG78;A0A0H2UH41;A0A087X187;A0A087WTB9;Q6S5H5;A6NI47;Q6S545	1;1;1;1;1;1;1	1;1;1;1;1;1;1	1;1;1;1;1;1;1	POTE ankyrin domain family member G;Putative POTE ankyrin domain family member M;POTE ankyrin domain family member H	POTEH;POTEG;POTEM	;;;;;;	7	1	1	1	1	0	0	0	0	0	1	0	0	0	0	0	1	0	0	0	0	0	4.6	4.6	4.6	34.469	303	303;322;486;508;508;508;545	1	1	1	-2	4.6	0	0	0	0	0	0	0	0	0
E7ERH1;A0A087WWW7;E9PGF5;E9PF55;Q9HBL0	E7ERH1;A0A087WWW7;E9PGF5;E9PF55;Q9HBL0	1;1;1;1;1	1;1;1;1;1	1;1;1;1;1	Tensin-1	TNS1	;;;;	5	1	1	1	0	0	0	0	0	1	0	0	0	0	0	1	0	0	0	0	0	1	3.5	3.5	3.5	85.658	780	780;1365;1714;1721;1735	1	1	1	-2	0	0	0	0	0	3.5	0	0	0	0
A0A087WXT8;C9J979	A0A087WXT8;C9J979	1;1	1;1	1;1		CPSF3L	;	2	1	1	1	0	0	1	0	0	0	0	0	1	0	0	0	0	0	1	0	0	0	7.6	7.6	7.6	31.187	289	289;344	1	1	1	-2	0	0	7.6	0	0	0	0	0	0	0
A0A087WZR9	A0A087WZR9	2	1	1	Pyrroline-5-carboxylate reductase	PYCR2		1	2	1	1	0	0	0	2	1	1	0	0	0	1	0	0	0	0	0	1	0	0	8.2	5	5	33.637	319	319	1	1	1	-2	0	0	0	8.2	3.1	3.1	0	0	0	0
A0A087WZX6;H0YCN5;Q8IZY2	A0A087WZX6;H0YCN5;Q8IZY2	1;1;1	1;1;1	1;1;1	ATP-binding cassette sub-family A member 7	ABCA7	;;	3	1	1	1	0	0	0	0	1	0	0	0	0	0	1	0	0	0	0	0	1	0	4.3	4.3	4.3	30.033	280	280;591;2146	1	1	1	-2	0	0	0	0	4.3	0	0	0	0	0
S4R418;F5H0W4;A0A087X188;Q9UBW5	S4R418;F5H0W4;A0A087X188;Q9UBW5	1;1;1;1	1;1;1;1	1;1;1;1	Bridging integrator 2	BIN2	;;;	4	1	1	1	0	1	0	0	0	0	0	1	0	0	0	0	0	1	0	0	0	0	3.4	3.4	3.4	58.913	536	536;539;597;565	1	1	1	-2	0	3.4	0	0	0	0	0	0	0	0
A0A087X1N7;P20929	A0A087X1N7;P20929	1;1	1;1	1;1	Nebulin	NEB	;	2	1	1	1	0	0	1	0	0	0	0	0	1	0	0	0	0	0	1	0	0	0	0.2	0.2	0.2	990.84	8560	8560;6669	1	1	1	-2	0	0	0.2	0	0	0	0	0	0	0
X6RGR3;Q5JUD8;H0Y3S1;A0A088AWN3;A0A0A0MSY4;Q9BZ29	X6RGR3;Q5JUD8;H0Y3S1;A0A088AWN3;A0A0A0MSY4;Q9BZ29	1;1;1;1;1;1	1;1;1;1;1;1	1;1;1;1;1;1	Dedicator of cytokinesis protein 9	DOCK9	;;;;;	6	1	1	1	0	0	0	0	0	1	0	0	0	0	0	1	0	0	0	0	0	1	6.8	6.8	6.8	28.148	250	250;424;669;2081;2101;2069	1	1	1	-2	0	0	0	0	0	6.8	0	0	0	0
A0A096LNQ0	A0A096LNQ0	1	1	1		ZNF638		1	1	1	1	0	0	0	0	1	0	0	0	0	0	1	0	0	0	0	0	1	0	7.6	7.6	7.6	19.802	171	171	1	1	1	-2	0	0	0	0	7.6	0	0	0	0	0
A0A0C4DGK3;G3V5X4;A0A0A0MRE3;Q8WXH0	A0A0C4DGK3;G3V5X4;A0A0A0MRE3;Q8WXH0	1;1;1;1	1;1;1;1	1;1;1;1	Nesprin-2	SYNE2	;;;	4	1	1	1	1	0	0	0	0	0	1	0	0	0	0	0	1	0	0	0	0	0	0.3	0.3	0.3	408.72	3541	3541;6818;6824;6885	1	2	1	-2	0.3	0	0	0	0	0	0	0	0	0
K7EIP4;A0A0A6YYF2;Q16787	K7EIP4;A0A0A6YYF2;Q16787	1;1;1	1;1;1	1;1;1	Laminin subunit alpha-3	LAMA3	;;	3	1	1	1	0	1	0	0	0	0	0	1	0	0	0	0	0	1	0	0	0	0	2.3	2.3	2.3	128.17	1147	1147;1724;3333	1	1	1	-2	0	2.3	0	0	0	0	0	0	0	0
V9GY41;V9GYQ2;V9GYK4;V9GYC6;V9GZ77;A0A0C4DFV7;E7EVL8;Q02928	V9GY41;V9GYQ2;V9GYK4;V9GYC6;V9GZ77;A0A0C4DFV7;E7EVL8;Q02928	1;1;1;1;1;1;1;1	1;1;1;1;1;1;1;1	1;1;1;1;1;1;1;1	Cytochrome P450 4A11	CYP4A11	;;;;;;;	8	1	1	1	0	1	0	0	0	0	0	1	0	0	0	0	0	1	0	0	0	0	6	6	6	25.087	215	215;249;264;377;421;455;520;519	1	1	1	-2	0	6	0	0	0	0	0	0	0	0
A0A0G2JMC3;W4VSQ5	A0A0G2JMC3;W4VSQ5	1;1	1;1	1;1		LAIR1	;	2	1	1	1	0	0	0	1	0	0	0	0	0	1	0	0	0	0	0	1	0	0	13.6	13.6	13.6	12.127	110	110;127	1	1	1	-2	0	0	0	13.6	0	0	0	0	0	0
F8WDY6;H0YHM6;A0A0J9YWF7;A0A1B0GTY9;A0A140T9V3;A0A1B0GUA1;A0A1B0GTG2;A0A1B0GW82;A0A1B0GW77;P49419	F8WDY6;H0YHM6;A0A0J9YWF7;A0A1B0GTY9;A0A140T9V3;A0A1B0GUA1;A0A1B0GTG2;A0A1B0GW82;A0A1B0GW77;P49419	1;1;1;1;1;1;1;1;1;1	1;1;1;1;1;1;1;1;1;1	1;1;1;1;1;1;1;1;1;1	Alpha-aminoadipic semialdehyde dehydrogenase	ALDH7A1	;;;;;;;;;	10	1	1	1	0	1	0	0	0	0	0	1	0	0	0	0	0	1	0	0	0	0	11	11	11	15.3	136	136;239;294;479;502;521;536;545;554;539	1	1	1	-2	0	11	0	0	0	0	0	0	0	0
A0A0U1RR71;A1L390	A0A0U1RR71;A1L390	1;1	1;1	1;1	Pleckstrin homology domain-containing family G member 3	PLEKHG3	;	2	1	1	1	0	1	0	0	0	0	0	1	0	0	0	0	0	1	0	0	0	0	1.5	1.5	1.5	67.713	603	603;1219	1	1	1	-2	0	1.5	0	0	0	0	0	0	0	0
A2A304;Q96NH3	A2A304;Q96NH3	1;1	1;1	1;1	Protein broad-minded	TBC1D32	;	2	1	1	1	0	0	0	1	0	0	0	0	0	1	0	0	0	0	0	1	0	0	9.4	9.4	9.4	24.855	213	213;1257	1	1	1	-2	0	0	0	9.4	0	0	0	0	0	0
A2RRE0;Q9Y4E6	A2RRE0;Q9Y4E6	1;1	1;1	1;1	WD repeat-containing protein 7	WDR7	;	2	1	1	1	1	0	0	0	0	0	1	0	0	0	0	0	1	0	0	0	0	0	1.3	1.3	1.3	89.343	815	815;1490	1	1	1	-2	1.3	0	0	0	0	0	0	0	0	0
A2RUB1	A2RUB1	1	1	1	Uncharacterized protein C17orf104	C17orf104		1	1	1	1	0	0	1	0	0	0	0	0	1	0	0	0	0	0	1	0	0	0	2	2	2	107.56	952	952	1	1	1	-2	0	0	2	0	0	0	0	0	0	0
A6NCN8	A6NCN8	1	1	1	Uncharacterized protein ENSP00000372125			1	1	1	1	1	1	0	1	0	0	1	1	0	1	0	0	1	1	0	1	0	0	4.9	4.9	4.9	35.333	305	305	1	3	1	-2	4.9	4.9	0	4.9	0	0	0	0	0	0
A6NL08	A6NL08	1	1	1	Olfactory receptor 6C75	OR6C75		1	1	1	1	1	0	0	0	0	0	1	0	0	0	0	0	1	0	0	0	0	0	3.5	3.5	3.5	35.372	312	312	1	1	1	-2	3.5	0	0	0	0	0	0	0	0	0
C9J2C0;Q9NY65;V9GZ17;C9K0S6;C9JDL2;Q9H853	C9J2C0;Q9NY65	15;15;5;3;3;2	0;0;0;0;0;0	0;0;0;0;0;0	Tubulin alpha-8 chain	TUBA8	;	6	15	0	0	13	14	14	14	14	15	0	0	0	0	0	0	0	0	0	0	0	0	32.3	0	0	51.984	467	467;449;275;47;119;241	NaN		1	-2	32.3	32.3	32.3	32.3	32.3	32.3	0	0	0	0
C9JA08;Q96D46	C9JA08;Q96D46	1;1	1;1	1;1	60S ribosomal export protein NMD3	NMD3	;	2	1	1	1	0	1	0	0	0	0	0	1	0	0	0	0	0	1	0	0	0	0	4	4	4	60.125	529	529;503	1	1	1	-2	0	4	0	0	0	0	0	0	0	0
C9JPQ4;Q4VNC0	C9JPQ4;Q4VNC0	1;1	1;1	1;1	Probable cation-transporting ATPase 13A5	ATP13A5	;	2	1	1	1	1	0	0	0	0	0	1	0	0	0	0	0	1	0	0	0	0	0	16.5	16.5	16.5	18.415	158	158;1218	1	1	1	-2	16.5	0	0	0	0	0	0	0	0	0
CON__ENSEMBL:ENSBTAP00000038253	CON__ENSEMBL:ENSBTAP00000038253	11	0	0				1	11	0	0	10	10	11	10	11	11	0	0	0	0	0	0	0	0	0	0	0	0	14.2	0	0	63.165	606	606	NaN		1	-2	14.2	14.2	14.2	14	14.2	14.2	0	0	0	0
CON__O95678;O95678	CON__O95678;O95678	12;12	0;0	0;0	Keratin, type II cytoskeletal 75	KRT75	;	2	12	0	0	8	7	8	11	12	11	0	0	0	0	0	0	0	0	0	0	0	0	17.1	0	0	59.504	551	551;551	NaN		1	-2	13.4	11.1	12.5	15.4	17.1	16.9	0	0	0	0
CON__P48668;P48668	CON__P48668;P48668	29;29	0;0	0;0	Keratin, type II cytoskeletal 6C	KRT6C	;	2	29	0	0	24	21	22	22	23	23	0	0	0	0	0	0	0	0	0	0	0	0	44.9	0	0	60.024	564	564;564	NaN		1	-2	39.9	37.2	37.2	33.5	33.9	35.3	0	0	0	0
CON__P50446	CON__P50446	15	0	0				1	15	0	0	11	10	10	14	14	13	0	0	0	0	0	0	0	0	0	0	0	0	20.4	0	0	59.334	553	553	NaN		1	-2	17	14.6	15.9	20.3	19	18.8	0	0	0	0
CON__Q14CN4-1;CON__Q6IME9;Q14CN4;H0YIG3	CON__Q14CN4-1;CON__Q6IME9;Q14CN4	3;3;3;1	0;0;0;0	0;0;0;0	Keratin, type II cytoskeletal 72	KRT72	;;	4	3	0	0	2	2	2	2	3	3	0	0	0	0	0	0	0	0	0	0	0	0	5.5	0	0	55.877	511	511;520;511;192	NaN		1	-2	3.1	3.1	3.1	3.1	5.5	5.5	0	0	0	0
E9PHK0;CON__Q2KIS7;P05452	E9PHK0;CON__Q2KIS7;P05452	1;1;1	1;1;1	1;1;1	Tetranectin	CLEC3B	;;	3	1	1	1	1	0	0	0	0	0	1	0	0	0	0	0	1	0	0	0	0	0	11.2	11.2	11.2	17.794	160	160;202;202	1	1	1	-2	11.2	0	0	0	0	0	0	0	0	0
CON__Q3TTY5	CON__Q3TTY5	9	0	0				1	9	0	0	7	6	8	8	9	9	0	0	0	0	0	0	0	0	0	0	0	0	9.9	0	0	70.922	707	707	NaN		1	-2	7.2	7.5	8.8	9.8	9.9	9.9	0	0	0	0
D6RAX4;E9PDA6;Q6ZV50	D6RAX4;E9PDA6;Q6ZV50	1;1;1	1;1;1	1;1;1	DNA-binding protein RFX8	RFX8	;;	3	1	1	1	1	0	0	0	0	0	1	0	0	0	0	0	1	0	0	0	0	0	20	20	20	9.3727	80	80;153;586	1	1	1	-2	20	0	0	0	0	0	0	0	0	0
D6RDB1	D6RDB1	1	1	1		SMIM14		1	1	1	1	0	1	0	0	0	0	0	1	0	0	0	0	0	1	0	0	0	0	44.7	44.7	44.7	4.306	38	38	1	1	1	-2	0	44.7	0	0	0	0	0	0	0	0
D6REQ4	D6REQ4	1	1	1		PACRGL		1	1	1	1	0	0	0	0	0	1	0	0	0	0	0	1	0	0	0	0	0	1	12.6	12.6	12.6	9.3634	87	87	1	1	1	-2	0	0	0	0	0	12.6	0	0	0	0
E5RGA9;P61601	E5RGA9;P61601	1;1	1;1	1;1	Neurocalcin-delta	NCALD	;	2	1	1	1	0	0	0	0	1	0	0	0	0	0	1	0	0	0	0	0	1	0	6.2	6.2	6.2	22.448	194	194;193	1	1	0.0031056	2.0489	0	0	0	0	6.2	0	0	0	0	0
E7EPW7	E7EPW7	1	1	1	Tyrosine-protein kinase receptor	ALK		1	1	1	1	0	0	0	1	0	0	0	0	0	1	0	0	0	0	0	1	0	0	3.4	3.4	3.4	64.413	580	580	1	1	1	-2	0	0	0	3.4	0	0	0	0	0	0
E7ETY0;Q92876	E7ETY0;Q92876	1;1	1;1	1;1	Kallikrein-6	KLK6	;	2	1	1	1	0	0	0	0	1	1	0	0	0	0	1	1	0	0	0	0	1	1	17.5	17.5	17.5	13.108	120	120;244	1	2	1	-2	0	0	0	0	17.5	17.5	0	0	0	0
E7EX40;Q6WKZ4	E7EX40;Q6WKZ4	1;1	1;1	1;1	Rab11 family-interacting protein 1	RAB11FIP1	;	2	1	1	1	0	0	0	1	0	0	0	0	0	1	0	0	0	0	0	1	0	0	4.4	4.4	4.4	54.832	501	501;1283	1	1	1	-2	0	0	0	4.4	0	0	0	0	0	0
E9PBQ8;O00476	E9PBQ8;O00476	1;1	1;1	1;1	Sodium-dependent phosphate transport protein 4	SLC17A3	;	2	1	1	1	1	0	0	0	0	0	1	0	0	0	0	0	1	0	0	0	0	0	10.7	10.7	10.7	12.149	112	112;420	1	1	1	-2	10.7	0	0	0	0	0	0	0	0	0
E9PHY1;O75197	E9PHY1;O75197	1;1	1;1	1;1	Low-density lipoprotein receptor-related protein 5	LRP5	;	2	1	1	1	0	0	1	0	0	0	0	0	1	0	0	0	0	0	1	0	0	0	4.2	4.2	4.2	52.432	471	471;1615	1	1	1	-2	0	0	4.2	0	0	0	0	0	0	0
E9PKE7;E9PKK0;Q9C0C2	E9PKE7;E9PKK0;Q9C0C2	1;1;1	1;1;1	1;1;1	182 kDa tankyrase-1-binding protein	TNKS1BP1	;;	3	1	1	1	0	0	0	0	1	0	0	0	0	0	1	0	0	0	0	0	1	0	11.9	11.9	11.9	14.858	143	143;243;1729	1	1	1	-2	0	0	0	0	11.9	0	0	0	0	0
E9PMA1;Q86TM6	E9PMA1;Q86TM6	1;1	1;1	1;1	E3 ubiquitin-protein ligase synoviolin	SYVN1	;	2	1	1	1	0	1	0	0	0	0	0	1	0	0	0	0	0	1	0	0	0	0	4.7	4.7	4.7	27.75	236	236;617	1	1	1	-2	0	4.7	0	0	0	0	0	0	0	0
F5GWN9;F8WE42;F5H101;Q76FK4	F5GWN9;F8WE42;F5H101;Q76FK4	1;1;1;1	1;1;1;1	1;1;1;1	Nucleolar protein 8	NOL8	;;;	4	1	1	1	0	0	0	1	0	0	0	0	0	1	0	0	0	0	0	1	0	0	2.4	2.4	2.4	46.567	413	413;969;1085;1167	1	1	1	-2	0	0	0	2.4	0	0	0	0	0	0
F5GYX7;P09238	F5GYX7;P09238	1;1	1;1	1;1	Stromelysin-2	MMP10	;	2	1	1	1	1	0	0	0	0	0	1	0	0	0	0	0	1	0	0	0	0	0	5	5	5	20.482	181	181;476	1	1	1	-2	5	0	0	0	0	0	0	0	0	0
F5GZP6;Q86W92	F5GZP6;Q86W92	1;1	1;1	1;1	Liprin-beta-1	PPFIBP1	;	2	1	1	1	0	0	0	0	1	0	0	0	0	0	1	0	0	0	0	0	1	0	1.7	1.7	1.7	84.071	744	744;1011	1	1	1	-2	0	0	0	0	1.7	0	0	0	0	0
F5H0J3	F5H0J3	2	1	1		NDUFA9		1	2	1	1	1	2	0	0	0	0	0	1	0	0	0	0	0	1	0	0	0	0	28.7	14	14	15.733	136	136	1	1	1	-2	14.7	28.7	0	0	0	0	0	0	0	0
F5H381	F5H381	1	1	1		SSPN		1	1	1	1	0	0	0	1	0	0	0	0	0	1	0	0	0	0	0	1	0	0	8.3	8.3	8.3	13.641	120	120	1	1	1	-2	0	0	0	8.3	0	0	0	0	0	0
H0Y5L8;F6VUX8;Q9HC77	H0Y5L8;F6VUX8;Q9HC77	1;1;1	1;1;1	1;1;1	Centromere protein J	CENPJ	;;	3	1	1	1	0	0	0	0	0	1	0	0	0	0	0	1	0	0	0	0	0	1	10.7	10.7	10.7	23.521	196	196;1136;1338	1	1	1	-2	0	0	0	0	0	10.7	0	0	0	0
F8WCK2;F8VPA7;F8VS27;P43897	F8WCK2;F8VPA7;F8VS27;P43897	1;1;1;1	1;1;1;1	1;1;1;1	Elongation factor Ts, mitochondrial	TSFM	;;;	4	1	1	1	0	0	0	0	1	0	0	0	0	0	1	0	0	0	0	0	1	0	7.9	7.9	7.9	9.6942	89	89;200;230;325	1	1	1	-2	0	0	0	0	7.9	0	0	0	0	0
F8VXK4	F8VXK4	1	1	1		ACAD10		1	1	1	1	0	1	0	0	0	0	0	1	0	0	0	0	0	1	0	0	0	0	11	11	11	16.418	146	146	1	1	1	-2	0	11	0	0	0	0	0	0	0	0
F8W1U3;A0A0U1RQU6	F8W1U3	6;1	1;1	1;1		KRT8		2	6	1	1	5	3	4	5	6	5	0	0	0	0	1	0	0	0	0	0	1	0	14.9	6.6	6.6	32.548	289	289;32	1	1	1	-2	8.3	5.9	5.9	8.3	14.9	8.3	0	0	0	0
F8WC88;Q5MAI5	F8WC88;Q5MAI5	1;1	1;1	1;1	Cyclin-dependent kinase-like 4	CDKL4	;	2	1	1	1	0	0	0	0	0	1	0	0	0	0	0	1	0	0	0	0	0	1	29.3	29.3	29.3	6.5527	58	58;379	1	1	1	-2	0	0	0	0	0	29.3	0	0	0	0
F8WCN1;Q9H3R0	F8WCN1;Q9H3R0	1;1	1;1	1;1	Lysine-specific demethylase 4C	KDM4C	;	2	1	1	1	0	0	1	0	0	0	0	0	1	0	0	0	0	0	1	0	0	0	3.5	3.5	3.5	43.398	373	373;1056	1	1	1	-2	0	0	3.5	0	0	0	0	0	0	0
H0Y6I6;Q96ME1	H0Y6I6;Q96ME1	1;1	1;1	1;1	F-box/LRR-repeat protein 18	FBXL18	;	2	1	1	1	0	0	0	0	1	0	0	0	0	0	1	0	0	0	0	0	1	0	3.6	3.6	3.6	74.789	685	685;805	1	1	1	-2	0	0	0	0	3.6	0	0	0	0	0
H3BLT5;H0Y781;Q2LD37	H3BLT5;H0Y781;Q2LD37	1;1;1	1;1;1	1;1;1	Uncharacterized protein KIAA1109	KIAA1109	;;	3	1	1	1	0	0	0	0	0	1	0	0	0	0	0	1	0	0	0	0	0	1	1.4	1.4	1.4	152.56	1381	1381;1674;5005	1	1	1	-2	0	0	0	0	0	1.4	0	0	0	0
H0Y8M1	H0Y8M1	1	1	1		NPNT		1	1	1	1	0	0	0	1	1	0	0	0	0	1	1	0	0	0	0	1	1	0	9.6	9.6	9.6	12.058	104	104	1	2	0.0040404	1.9464	0	0	0	9.6	9.6	0	0	0	0	0
H0YCZ2;Q8NG31	H0YCZ2;Q8NG31	1;1	1;1	1;1	Protein CASC5	CASC5	;	2	1	1	1	0	1	0	0	0	0	0	1	0	0	0	0	0	1	0	0	0	0	0.7	0.7	0.7	154.97	1361	1361;2342	1	1	1	-2	0	0.7	0	0	0	0	0	0	0	0
H0YES8	H0YES8	2	1	1		RPS3		1	2	1	1	1	2	1	1	1	1	0	1	0	0	0	0	0	1	0	0	0	0	66.7	39.4	39.4	3.633	33	33	1	1	1	-2	27.3	66.7	27.3	27.3	27.3	27.3	0	0	0	0
H0YF30;O94830	H0YF30;O94830	1;1	1;1	1;1	Phospholipase DDHD2	DDHD2	;	2	1	1	1	0	0	0	0	1	0	0	0	0	0	1	0	0	0	0	0	1	0	12.6	12.6	12.6	20.412	183	183;711	1	1	1	-2	0	0	0	0	12.6	0	0	0	0	0
H0YH12;Q9NVM9	H0YH12;Q9NVM9	1;1	1;1	1;1	Protein asunder homolog	ASUN	;	2	1	1	1	0	0	1	0	0	0	0	0	1	0	0	0	0	0	1	0	0	0	3.7	3.7	3.7	39.961	353	353;706	1	1	1	-2	0	0	3.7	0	0	0	0	0	0	0
H0YM98;P30532	H0YM98;P30532	1;1	1;1	1;1	Neuronal acetylcholine receptor subunit alpha-5	CHRNA5	;	2	1	1	1	0	0	1	0	0	0	0	0	1	0	0	0	0	0	1	0	0	0	5.6	5.6	5.6	17.809	160	160;468	1	1	1	-2	0	0	5.6	0	0	0	0	0	0	0
H0YNX5	H0YNX5	2	1	1	Signal peptidase complex catalytic subunit SEC11	SEC11A		1	2	1	1	0	0	0	2	0	0	0	0	0	1	0	0	0	0	0	1	0	0	41.5	34	34	11.986	106	106	1	1	1	-2	0	0	0	41.5	0	0	0	0	0	0
H3BRL9;P78549	H3BRL9;P78549	1;1	1;1	1;1	Endonuclease III-like protein 1	NTHL1	;	2	1	1	1	0	0	1	0	0	0	0	0	1	0	0	0	0	0	1	0	0	0	11	11	11	23.717	218	218;312	1	1	1	-2	0	0	11	0	0	0	0	0	0	0
H7BYY0	H7BYY0	1	1	1		BSCL2		1	1	1	1	0	0	0	1	0	0	0	0	0	1	0	0	0	0	0	1	0	0	32.9	32.9	32.9	8.8049	79	79	1	1	1	-2	0	0	0	32.9	0	0	0	0	0	0
H7C4M4	H7C4M4	1	1	1		HEG1		1	1	1	1	0	0	0	1	0	0	0	0	0	1	0	0	0	0	0	1	0	0	11.3	11.3	11.3	29.503	265	265	1	1	1	-2	0	0	0	11.3	0	0	0	0	0	0
J3KNF5;O15078	J3KNF5;O15078	1;1	1;1	1;1	Centrosomal protein of 290 kDa	CEP290	;	2	1	1	1	0	0	1	1	0	0	0	0	1	1	0	0	0	0	1	1	0	0	0.4	0.4	0.4	290.54	2481	2481;2479	1	2	1	-2	0	0	0.4	0.4	0	0	0	0	0	0
J3KP02	J3KP02	1	1	1		LEKR1		1	1	1	1	0	0	0	0	0	1	0	0	0	0	0	1	0	0	0	0	0	1	2.5	2.5	2.5	81.228	692	692	1	1	1	-2	0	0	0	0	0	2.5	0	0	0	0
K7EJW6;Q8WWZ7	K7EJW6;Q8WWZ7	1;1	1;1	1;1	ATP-binding cassette sub-family A member 5	ABCA5	;	2	1	1	1	0	1	1	1	1	1	0	1	1	1	1	1	0	1	1	1	1	1	2.4	2.4	2.4	65.537	573	573;1642	1	5	0.0010627	2.2316	0	2.4	2.4	2.4	2.4	2.4	0	0	0	0
K7EM84;L7N2F3;Q32NC0	K7EM84;L7N2F3;Q32NC0	1;1;1	1;1;1	1;1;1	UPF0711 protein C18orf21	C18orf21	;;	3	1	1	1	1	0	0	0	0	0	1	0	0	0	0	0	1	0	0	0	0	0	20.5	20.5	20.5	9.5088	88	88;110;220	1	1	1	-2	20.5	0	0	0	0	0	0	0	0	0
K7EMI9	K7EMI9	1	1	1		CCDC106		1	1	1	1	0	0	0	0	0	1	0	0	0	0	0	1	0	0	0	0	0	1	7.3	7.3	7.3	27.877	245	245	1	1	1	-2	0	0	0	0	0	7.3	0	0	0	0
K7EMN8	K7EMN8	1	1	1		NLRP11		1	1	1	1	1	0	0	0	0	0	1	0	0	0	0	0	1	0	0	0	0	0	2.4	2.4	2.4	75.403	654	654	1	1	1	-2	2.4	0	0	0	0	0	0	0	0	0
K7EMS3	K7EMS3	4	1	1		KRT19		1	4	1	1	3	2	2	2	2	1	0	1	0	0	0	0	0	1	0	0	0	0	17.1	5.5	5.5	20.186	181	181	1	1	1	-2	17.1	10.5	11	11	11	5	0	0	0	0
K7EQ92	K7EQ92	1	1	1		ZNF784		1	1	1	1	1	0	0	0	0	0	1	0	0	0	0	0	1	0	0	0	0	0	40.5	40.5	40.5	4.3568	42	42	1	1	1	-2	40.5	0	0	0	0	0	0	0	0	0
K7ERY6	K7ERY6	1	1	1		C19orf57		1	1	1	1	0	0	0	1	0	0	0	0	0	1	0	0	0	0	0	1	0	0	9.4	9.4	9.4	14.648	139	139	1	1	1	-2	0	0	0	9.4	0	0	0	0	0	0
M0QXF9	M0QXF9	1	1	1	Branched-chain-amino-acid aminotransferase	BCAT2		1	1	1	1	0	0	0	0	0	1	0	0	0	0	0	1	0	0	0	0	0	1	2	2	2	49.967	445	445	1	1	1	-2	0	0	0	0	0	2	0	0	0	0
O00442	O00442	1	1	1	RNA 3-terminal phosphate cyclase	RTCA		1	1	1	1	0	0	1	0	0	0	0	0	1	0	0	0	0	0	1	0	0	0	4.6	4.6	4.6	39.336	366	366	1	1	1	-2	0	0	4.6	0	0	0	0	0	0	0
O14686	O14686	2	2	2	Histone-lysine N-methyltransferase 2D	KMT2D		1	2	2	2	2	1	1	0	0	0	2	1	1	0	0	0	2	1	1	0	0	0	0.7	0.7	0.7	593.38	5537	5537	1	4	0.0010604	2.2197	0.7	0.3	0.3	0	0	0	0	0	0	0
O15018	O15018	1	1	1	PDZ domain-containing protein 2;Processed PDZ domain-containing protein 2	PDZD2		1	1	1	1	1	0	0	0	0	0	1	0	0	0	0	0	1	0	0	0	0	0	0.7	0.7	0.7	301.64	2839	2839	1	1	1	-2	0.7	0	0	0	0	0	0	0	0	0
O15265	O15265	1	1	1	Ataxin-7	ATXN7		1	1	1	1	1	0	0	0	0	0	1	0	0	0	0	0	1	0	0	0	0	0	3	3	3	95.45	892	892	1	1	1	-2	3	0	0	0	0	0	0	0	0	0
O15438	O15438	1	1	1	Canalicular multispecific organic anion transporter 2	ABCC3		1	1	1	1	0	0	0	0	1	1	0	0	0	0	1	1	0	0	0	0	1	1	1.2	1.2	1.2	169.34	1527	1527	1	2	1	-2	0	0	0	0	1.2	1.2	0	0	0	0
O75140	O75140	1	1	1	DEP domain-containing protein 5	DEPDC5		1	1	1	1	0	0	0	0	1	1	0	0	0	0	1	1	0	0	0	0	1	1	1	1	1	181.26	1603	1603	1	2	1	-2	0	0	0	0	1	1	0	0	0	0
O75563	O75563	1	1	1	Src kinase-associated phosphoprotein 2	SKAP2		1	1	1	1	1	0	0	0	0	0	1	0	0	0	0	0	1	0	0	0	0	0	5	5	5	41.216	359	359	1	1	1	-2	5	0	0	0	0	0	0	0	0	0
O75631	O75631	1	1	1	Uroplakin-3a	UPK3A		1	1	1	1	0	0	0	1	0	0	0	0	0	1	0	0	0	0	0	1	0	0	7.3	7.3	7.3	30.669	287	287	1	1	1	-2	0	0	0	7.3	0	0	0	0	0	0
O75820	O75820	1	1	1	Zinc finger protein 189	ZNF189		1	1	1	1	0	1	0	0	0	0	0	1	0	0	0	0	0	1	0	0	0	0	3	3	3	72.975	626	626	1	1	1	-2	0	3	0	0	0	0	0	0	0	0
O94986	O94986	1	1	1	Centrosomal protein of 152 kDa	CEP152		1	1	1	1	0	0	0	1	0	0	0	0	0	1	0	0	0	0	0	1	0	0	2	2	2	195.62	1710	1710	1	1	1	-2	0	0	0	2	0	0	0	0	0	0
O95202	O95202	1	1	1	LETM1 and EF-hand domain-containing protein 1, mitochondrial	LETM1		1	1	1	1	1	0	0	0	0	0	1	0	0	0	0	0	1	0	0	0	0	0	1.2	1.2	1.2	83.353	739	739	1	1	1	-2	1.2	0	0	0	0	0	0	0	0	0
P04259	P04259	28	0	0	Keratin, type II cytoskeletal 6B	KRT6B		1	28	0	0	24	21	22	22	22	23	0	0	0	0	0	0	0	0	0	0	0	0	43.3	0	0	60.066	564	564	NaN		1	-2	39.9	37.2	37.2	33.5	32.3	35.3	0	0	0	0
P0C7M7	P0C7M7	1	1	1	Acyl-coenzyme A synthetase ACSM4, mitochondrial	ACSM4		1	1	1	1	1	0	0	1	0	0	1	0	0	1	0	0	1	0	0	1	0	0	2.6	2.6	2.6	65.702	580	580	1	2	1	-2	2.6	0	0	2.6	0	0	0	0	0	0
P12270	P12270	1	1	1	Nucleoprotein TPR	TPR		1	1	1	1	0	0	0	1	1	1	0	0	0	1	1	1	0	0	0	1	1	1	0.8	0.8	0.8	267.29	2363	2363	1	3	1	-2	0	0	0	0.8	0.8	0.8	0	0	0	0
P16066	P16066	1	1	1	Atrial natriuretic peptide receptor 1	NPR1		1	1	1	1	0	0	0	1	0	0	0	0	0	1	0	0	0	0	0	1	0	0	1.3	1.3	1.3	118.92	1061	1061	1	1	1	-2	0	0	0	1.3	0	0	0	0	0	0
P17947	P17947	1	1	1	Transcription factor PU.1	SPI1		1	1	1	1	1	0	0	0	0	0	1	0	0	0	0	0	1	0	0	0	0	0	2.6	2.6	2.6	31.083	270	270	1	1	1	-2	2.6	0	0	0	0	0	0	0	0	0
P35712	P35712	1	1	1	Transcription factor SOX-6	SOX6		1	1	1	1	0	0	1	0	0	0	0	0	1	0	0	0	0	0	1	0	0	0	2.1	2.1	2.1	91.92	828	828	1	1	1	-2	0	0	2.1	0	0	0	0	0	0	0
P35749	P35749	22	0	0	Myosin-11	MYH11		1	22	0	0	20	20	20	4	4	5	0	0	0	0	0	0	0	0	0	0	0	0	11.5	0	0	227.34	1972	1972	NaN		1	-2	11	10.6	10.9	2.9	3	3.4	0	0	0	0
P56559;P49703	P56559;P49703	1;1	1;1	1;1	ADP-ribosylation factor-like protein 4C;ADP-ribosylation factor-like protein 4D	ARL4C;ARL4D	;	2	1	1	1	0	0	0	0	1	0	0	0	0	0	1	0	0	0	0	0	1	0	4.2	4.2	4.2	21.487	192	192;201	1	1	1	-2	0	0	0	0	4.2	0	0	0	0	0
P52306	P52306	1	1	1	Rap1 GTPase-GDP dissociation stimulator 1	RAP1GDS1		1	1	1	1	0	0	0	1	0	0	0	0	0	1	0	0	0	0	0	1	0	0	2.8	2.8	2.8	66.316	607	607	1	1	1	-2	0	0	0	2.8	0	0	0	0	0	0
P54868;Q01581	P54868;Q01581	1;1	1;1	1;1	Hydroxymethylglutaryl-CoA synthase, mitochondrial;Hydroxymethylglutaryl-CoA synthase, cytoplasmic	HMGCS2;HMGCS1	;	2	1	1	1	0	0	0	1	0	0	0	0	0	1	0	0	0	0	0	1	0	0	2.6	2.6	2.6	56.635	508	508;520	1	1	1	-2	0	0	0	2.6	0	0	0	0	0	0
P57772	P57772	1	1	1	Selenocysteine-specific elongation factor	EEFSEC		1	1	1	1	0	0	0	1	0	0	0	0	0	1	0	0	0	0	0	1	0	0	2.9	2.9	2.9	65.304	596	596	1	1	1	-2	0	0	0	2.9	0	0	0	0	0	0
P78367	P78367	1	1	1	Homeobox protein Nkx-3.2	NKX3-2		1	1	1	1	0	0	0	0	1	0	0	0	0	0	1	0	0	0	0	0	1	0	5.1	5.1	5.1	34.813	333	333	1	1	1	-2	0	0	0	0	5.1	0	0	0	0	0
Q01546	Q01546	10	0	0	Keratin, type II cytoskeletal 2 oral	KRT76		1	10	0	0	8	5	6	9	10	8	0	0	0	0	0	0	0	0	0	0	0	0	10	0	0	65.84	638	638	NaN		1	-2	8.6	7.1	7.1	9.9	10	9.4	0	0	0	0
Q12789	Q12789	1	1	1	General transcription factor 3C polypeptide 1	GTF3C1		1	1	1	1	0	0	0	1	0	0	0	0	0	1	0	0	0	0	0	1	0	0	0.8	0.8	0.8	238.87	2109	2109	1	1	1	-2	0	0	0	0.8	0	0	0	0	0	0
Q13127	Q13127	1	1	1	RE1-silencing transcription factor	REST		1	1	1	1	1	0	0	0	0	0	1	0	0	0	0	0	1	0	0	0	0	0	1.5	1.5	1.5	121.87	1097	1097	1	1	1	-2	1.5	0	0	0	0	0	0	0	0	0
Q14032	Q14032	1	1	1	Bile acid-CoA:amino acid N-acyltransferase	BAAT		1	1	1	1	1	0	0	0	0	0	1	0	0	0	0	0	1	0	0	0	0	0	5.7	5.7	5.7	46.299	418	418	1	1	1	-2	5.7	0	0	0	0	0	0	0	0	0
Q14999	Q14999	1	1	1	Cullin-7	CUL7		1	1	1	1	0	1	1	0	0	0	0	1	1	0	0	0	0	1	1	0	0	0	1.4	1.4	1.4	191.16	1698	1698	1	2	1	-2	0	1.4	1.4	0	0	0	0	0	0	0
Q2Y0W8	Q2Y0W8	1	1	1	Electroneutral sodium bicarbonate exchanger 1	SLC4A8		1	1	1	1	0	0	0	0	1	0	0	0	0	0	1	0	0	0	0	0	1	0	1.6	1.6	1.6	122.94	1093	1093	1	1	1	-2	0	0	0	0	1.6	0	0	0	0	0
Q32Q52	Q32Q52	1	1	1	Uncharacterized protein C12orf74	C12orf74		1	1	1	1	0	1	0	0	0	0	0	1	0	0	0	0	0	1	0	0	0	0	9.5	9.5	9.5	21.196	190	190	1	1	1	-2	0	9.5	0	0	0	0	0	0	0	0
Q49SQ1	Q49SQ1	1	1	1	Probable G-protein coupled receptor 33	GPR33		1	1	1	1	0	0	0	0	0	1	0	0	0	0	0	1	0	0	0	0	0	1	8.4	8.4	8.4	38.232	333	333	1	1	1	-2	0	0	0	0	0	8.4	0	0	0	0
Q5VZS7;Q53EL6	Q5VZS7;Q53EL6	1;1	1;1	1;1	Programmed cell death protein 4	PDCD4	;	2	1	1	1	0	1	0	0	0	0	0	1	0	0	0	0	0	1	0	0	0	0	9.1	9.1	9.1	25.197	231	231;469	1	1	1	-2	0	9.1	0	0	0	0	0	0	0	0
Q58FF3	Q58FF3	1	1	1	Putative endoplasmin-like protein	HSP90B2P		1	1	1	1	1	0	0	0	0	1	1	0	0	0	0	1	1	0	0	0	0	1	3	3	3	45.858	399	399	1	2	1	-2	3	0	0	0	0	3	0	0	0	0
Q5JXR6;Q9P2E3	Q5JXR6;Q9P2E3	1;1	1;1	1;1	NFX1-type zinc finger-containing protein 1	ZNFX1	;	2	1	1	1	0	0	1	0	0	0	0	0	1	0	0	0	0	0	1	0	0	0	0.8	0.8	0.8	146.22	1270	1270;1918	1	1	1	-2	0	0	0.8	0	0	0	0	0	0	0
Q5T764	Q5T764	1	1	1	Interferon-induced protein with tetratricopeptide repeats 1B	IFIT1B		1	1	1	1	0	0	0	0	0	1	0	0	0	0	0	1	0	0	0	0	0	1	1.7	1.7	1.7	54.992	474	474	1	1	1	-2	0	0	0	0	0	1.7	0	0	0	0
Q5T7N8	Q5T7N8	1	1	1	Protein FAM27D1	FAM27D1		1	1	1	1	0	0	0	0	0	1	0	0	0	0	0	1	0	0	0	0	0	1	6	6	6	24.905	215	215	1	1	1	-2	0	0	0	0	0	6	0	0	0	0
Q5VU61	Q5VU61	18	0	0		TPM3		1	18	0	0	14	17	17	0	1	0	0	0	0	0	0	0	0	0	0	0	0	0	52.9	0	0	26.056	223	223	NaN		1	-2	46.6	52.5	52.5	0	5.4	0	0	0	0	0
Q68DW7;Q8WVM7	Q68DW7;Q8WVM7	1;1	1;1	1;1	Cohesin subunit SA-1	DKFZp781D1416;STAG1	;	2	1	1	1	0	0	1	1	0	0	0	0	1	1	0	0	0	0	1	1	0	0	1.2	1.2	1.2	115.01	998	998;1258	1	2	1	-2	0	0	1.2	1.2	0	0	0	0	0	0
Q6AHZ1	Q6AHZ1	1	1	1	Zinc finger protein 518A	ZNF518A		1	1	1	1	0	0	1	0	0	0	0	0	1	0	0	0	0	0	1	0	0	0	1.1	1.1	1.1	166.78	1483	1483	1	1	1	-2	0	0	1.1	0	0	0	0	0	0	0
Q6IF42	Q6IF42	1	1	1	Olfactory receptor 2A2	OR2A2		1	1	1	1	0	0	0	1	1	1	0	0	0	1	1	1	0	0	0	1	1	1	8.2	8.2	8.2	35.82	318	318	1	3	1	-2	0	0	0	8.2	8.2	8.2	0	0	0	0
Q6MZM0	Q6MZM0	1	1	1	Hephaestin-like protein 1	HEPHL1		1	1	1	1	0	0	0	0	1	0	0	0	0	0	1	0	0	0	0	0	1	0	0.9	0.9	0.9	131.6	1159	1159	1	1	1	-2	0	0	0	0	0.9	0	0	0	0	0
Q6PCE3	Q6PCE3	1	1	1	Glucose 1,6-bisphosphate synthase	PGM2L1		1	1	1	1	0	0	0	0	1	0	0	0	0	0	1	0	0	0	0	0	1	0	2.3	2.3	2.3	70.441	622	622	1	1	1	-2	0	0	0	0	2.3	0	0	0	0	0
Q6PI48	Q6PI48	1	1	1	Aspartate--tRNA ligase, mitochondrial	DARS2		1	1	1	1	0	0	1	0	0	0	0	0	1	0	0	0	0	0	1	0	0	0	2.2	2.2	2.2	73.562	645	645	1	1	1	-2	0	0	2.2	0	0	0	0	0	0	0
Q6YHK3	Q6YHK3	1	1	1	CD109 antigen	CD109		1	1	1	1	0	0	0	0	0	1	0	0	0	0	0	1	0	0	0	0	0	1	1.9	1.9	1.9	161.69	1445	1445	1	1	1	-2	0	0	0	0	0	1.9	0	0	0	0
Q70JA7	Q70JA7	1	1	1	Chondroitin sulfate synthase 3	CHSY3		1	1	1	1	1	1	1	1	1	1	1	1	1	1	1	1	1	1	1	1	1	1	2.2	2.2	2.2	100.28	882	882	1	6	0	2.3644	2.2	2.2	2.2	2.2	2.2	2.2	0	0	0	0
Q7Z7L1	Q7Z7L1	1	1	1	Schlafen family member 11	SLFN11		1	1	1	1	1	0	0	1	1	0	1	0	0	1	1	0	1	0	0	1	1	0	1.9	1.9	1.9	102.83	901	901	1	3	1	-2	1.9	0	0	1.9	1.9	0	0	0	0	0
Q86Y01	Q86Y01	1	1	1	E3 ubiquitin-protein ligase DTX1	DTX1		1	1	1	1	0	0	0	0	1	0	0	0	0	0	1	0	0	0	0	0	1	0	3.1	3.1	3.1	67.368	620	620	1	1	1	-2	0	0	0	0	3.1	0	0	0	0	0
Q8IX04	Q8IX04	1	1	1	Ubiquitin-conjugating enzyme E2 variant 3	UEVLD		1	1	1	1	1	0	0	0	0	0	1	0	0	0	0	0	1	0	0	0	0	0	2.3	2.3	2.3	52.263	471	471	1	1	1	-2	2.3	0	0	0	0	0	0	0	0	0
Q8N6R0	Q8N6R0	1	1	1	Methyltransferase-like protein 13	METTL13		1	1	1	1	0	0	0	0	1	0	0	0	0	0	1	0	0	0	0	0	1	0	2.6	2.6	2.6	78.767	699	699	1	1	1	-2	0	0	0	0	2.6	0	0	0	0	0
Q8NCM8	Q8NCM8	1	1	1	Cytoplasmic dynein 2 heavy chain 1	DYNC2H1		1	1	1	1	0	1	0	0	0	0	0	1	0	0	0	0	0	1	0	0	0	0	0.7	0.7	0.7	492.62	4307	4307	1	1	1	-2	0	0.7	0	0	0	0	0	0	0	0
Q8NH93	Q8NH93	1	1	1	Olfactory receptor 1L3	OR1L3		1	1	1	1	0	0	0	0	0	1	0	0	0	0	0	1	0	0	0	0	0	1	6.2	6.2	6.2	36.632	324	324	1	1	1	-2	0	0	0	0	0	6.2	0	0	0	0
Q8NHV4	Q8NHV4	1	1	1	Protein NEDD1	NEDD1		1	1	1	1	0	1	0	0	0	0	0	1	0	0	0	0	0	1	0	0	0	0	1.7	1.7	1.7	71.965	660	660	1	1	1	-2	0	1.7	0	0	0	0	0	0	0	0
Q8WTW4	Q8WTW4	1	1	1	Nitrogen permease regulator 2-like protein	NPRL2		1	1	1	1	1	1	1	0	0	0	1	1	1	0	0	0	1	1	1	0	0	0	3.2	3.2	3.2	43.658	380	380	1	3	1	-2	3.2	3.2	3.2	0	0	0	0	0	0	0
Q92828	Q92828	1	1	1	Coronin-2A	CORO2A		1	1	1	1	0	0	0	0	0	1	0	0	0	0	0	1	0	0	0	0	0	1	2.1	2.1	2.1	59.763	525	525	1	1	1	-2	0	0	0	0	0	2.1	0	0	0	0
Q969F2	Q969F2	1	1	1	Protein naked cuticle homolog 2	NKD2		1	1	1	1	0	1	0	0	0	0	0	1	0	0	0	0	0	1	0	0	0	0	4	4	4	50.055	451	451	1	1	1	-2	0	4	0	0	0	0	0	0	0	0
Q96CN7	Q96CN7	1	1	1	Isochorismatase domain-containing protein 1	ISOC1		1	1	1	1	1	0	0	0	0	0	1	0	0	0	0	0	1	0	0	0	0	0	6.7	6.7	6.7	32.236	298	298	1	1	1	-2	6.7	0	0	0	0	0	0	0	0	0
Q96DV4	Q96DV4	1	1	1	39S ribosomal protein L38, mitochondrial	MRPL38		1	1	1	1	0	0	0	1	0	0	0	0	0	1	0	0	0	0	0	1	0	0	6.3	6.3	6.3	44.596	380	380	1	1	1	-2	0	0	0	6.3	0	0	0	0	0	0
Q96K12	Q96K12	1	1	1	Fatty acyl-CoA reductase 2	FAR2		1	1	1	1	0	0	0	1	0	0	0	0	0	1	0	0	0	0	0	1	0	0	5.8	5.8	5.8	59.438	515	515	1	1	1	-2	0	0	0	5.8	0	0	0	0	0	0
Q96KP4	Q96KP4	1	1	1	Cytosolic non-specific dipeptidase	CNDP2		1	1	1	1	0	0	0	0	1	0	0	0	0	0	1	0	0	0	0	0	1	0	4.4	4.4	4.4	52.878	475	475	1	1	1	-2	0	0	0	0	4.4	0	0	0	0	0
Q96NL0	Q96NL0	1	1	1	RUN domain-containing protein 3B	RUNDC3B		1	1	1	1	0	1	0	0	0	0	0	1	0	0	0	0	0	1	0	0	0	0	3.6	3.6	3.6	52.813	473	473	1	1	1	-2	0	3.6	0	0	0	0	0	0	0	0
Q99941	Q99941	1	1	1	Cyclic AMP-dependent transcription factor ATF-6 beta;Processed cyclic AMP-dependent transcription factor ATF-6 beta	ATF6B		1	1	1	1	0	0	1	0	0	0	0	0	1	0	0	0	0	0	1	0	0	0	1.4	1.4	1.4	76.708	703	703	1	1	1	-2	0	0	1.4	0	0	0	0	0	0	0
Q9BRX5	Q9BRX5	1	1	1	DNA replication complex GINS protein PSF3	GINS3		1	1	1	1	1	0	0	0	0	0	1	0	0	0	0	0	1	0	0	0	0	0	6.9	6.9	6.9	24.534	216	216	1	1	1	-2	6.9	0	0	0	0	0	0	0	0	0
Q9BXB5	Q9BXB5	1	1	1	Oxysterol-binding protein-related protein 10	OSBPL10		1	1	1	1	0	1	0	0	0	0	0	1	0	0	0	0	0	1	0	0	0	0	2.6	2.6	2.6	83.969	764	764	1	1	1	-2	0	2.6	0	0	0	0	0	0	0	0
Q9H0I2	Q9H0I2	1	1	1	Enkurin domain-containing protein 1	ENKD1		1	1	1	1	0	0	1	0	0	0	0	0	1	0	0	0	0	0	1	0	0	0	2.9	2.9	2.9	38.759	346	346	1	1	1	-2	0	0	2.9	0	0	0	0	0	0	0
Q9H1D9	Q9H1D9	1	1	1	DNA-directed RNA polymerase III subunit RPC6	POLR3F		1	1	1	1	0	0	0	1	0	0	0	0	0	1	0	0	0	0	0	1	0	0	6	6	6	35.684	316	316	1	1	1	-2	0	0	0	6	0	0	0	0	0	0
Q9H4Q4	Q9H4Q4	1	1	1	PR domain zinc finger protein 12	PRDM12		1	1	1	1	0	0	1	0	0	0	0	0	1	0	0	0	0	0	1	0	0	0	2.5	2.5	2.5	40.403	367	367	1	1	1	-2	0	0	2.5	0	0	0	0	0	0	0
Q9NPH3	Q9NPH3	1	1	1	Interleukin-1 receptor accessory protein	IL1RAP		1	1	1	1	0	0	0	1	0	0	0	0	0	1	0	0	0	0	0	1	0	0	3.5	3.5	3.5	65.418	570	570	1	1	1	-2	0	0	0	3.5	0	0	0	0	0	0
Q9NRM1	Q9NRM1	1	1	1	Enamelin	ENAM		1	1	1	1	0	1	0	0	0	0	0	1	0	0	0	0	0	1	0	0	0	0	1.6	1.6	1.6	128.78	1142	1142	1	1	1	-2	0	1.6	0	0	0	0	0	0	0	0
Q9NS56	Q9NS56	1	1	1	E3 ubiquitin-protein ligase Topors	TOPORS		1	1	1	1	0	0	0	1	0	0	0	0	0	1	0	0	0	0	0	1	0	0	2.1	2.1	2.1	119.2	1045	1045	1	1	1	-2	0	0	0	2.1	0	0	0	0	0	0
Q9P2N6	Q9P2N6	1	1	1	KAT8 regulatory NSL complex subunit 3	KANSL3		1	1	1	1	0	0	0	0	0	1	0	0	0	0	0	1	0	0	0	0	0	1	1.7	1.7	1.7	95.991	904	904	1	1	1	-2	0	0	0	0	0	1.7	0	0	0	0
Q9UJ14	Q9UJ14	1	1	1	Gamma-glutamyltransferase 7;Gamma-glutamyltransferase 7 heavy chain;Gamma-glutamyltransferase 7 light chain	GGT7		1	1	1	1	0	0	0	0	1	0	0	0	0	0	1	0	0	0	0	0	1	0	4.1	4.1	4.1	70.466	662	662	1	1	1	-2	0	0	0	0	4.1	0	0	0	0	0
Q9UJV3	Q9UJV3	1	1	1	Probable E3 ubiquitin-protein ligase MID2	MID2		1	1	1	1	0	0	1	0	0	0	0	0	1	0	0	0	0	0	1	0	0	0	1.6	1.6	1.6	83.209	735	735	1	1	1	-2	0	0	1.6	0	0	0	0	0	0	0
Q9UL25	Q9UL25	1	1	1	Ras-related protein Rab-21	RAB21		1	1	1	1	1	0	0	0	0	0	1	0	0	0	0	0	1	0	0	0	0	0	4.9	4.9	4.9	24.347	225	225	1	1	1	-2	4.9	0	0	0	0	0	0	0	0	0
Q9ULE4	Q9ULE4	1	1	1	Protein FAM184B	FAM184B		1	1	1	1	0	0	0	0	0	1	0	0	0	0	0	1	0	0	0	0	0	1	2.3	2.3	2.3	121.04	1060	1060	1	1	1	-2	0	0	0	0	0	2.3	0	0	0	0
Q9UPU3	Q9UPU3	1	1	1	VPS10 domain-containing receptor SorCS3	SORCS3		1	1	1	1	0	0	0	0	0	1	0	0	0	0	0	1	0	0	0	0	0	1	1.5	1.5	1.5	135.75	1222	1222	1	1	1	-2	0	0	0	0	0	1.5	0	0	0	0
Q9UPU7	Q9UPU7	1	1	1	TBC1 domain family member 2B	TBC1D2B		1	1	1	1	1	0	0	0	0	0	1	0	0	0	0	0	1	0	0	0	0	0	2.3	2.3	2.3	109.88	963	963	1	1	1	-2	2.3	0	0	0	0	0	0	0	0	0
Q9UQL6	Q9UQL6	1	1	1	Histone deacetylase 5	HDAC5		1	1	1	1	0	0	0	0	0	1	0	0	0	0	0	1	0	0	0	0	0	1	2.7	2.7	2.7	121.98	1122	1122	1	1	1	-2	0	0	0	0	0	2.7	0	0	0	0
REV__P13796	REV__P13796	1	1	1				1	1	1	1	0	1	0	0	0	0	0	1	0	0	0	0	0	1	0	0	0	0	0	0	0	70.288	627	627	1	1	1	-2	0	0	0	0	0	0	0	0	0	0
REV__Q96DT0	REV__Q96DT0	1	1	1				1	1	1	1	0	0	1	0	0	0	0	0	1	0	0	0	0	0	1	0	0	0	0	0	0	37.541	336	336	1	1	1	-2	0	0	0	0	0	0	0	0	0	0
REV__Q9C0B5	REV__Q9C0B5	1	1	1				1	1	1	1	1	0	0	0	0	0	1	0	0	0	0	0	1	0	0	0	0	0	0	0	0	77.544	715	715	1	1	1	-2	0	0	0	0	0	0	0	0	0	0
[truncated: 30 more columns]
