# Supplementary material for: MGVB: a new proteomics toolset for fast and efficient data analysis
Source: Research Square preprint supplement (doi:10.21203/rs.3.rs-4342344/v1), 2024-05-03
Supplement: Supplementary file 3 [file 38583e69c22b10eb1b39e0f7.xlsx]

## Sheet: scrib_mod_peptides
Supplementary Table 3. Modified Scribble peptides detected by combinatorial PTM search by MGVB.
Total	Matched	mod0_probs	mod1_probs	mod2_probs	Fragments	Masses	Scan	PrecScan	RetTime	Sequence	Charge	PrecMass	Score	Proteins	mod0	mod1	mod2	nMod	Missed	Decoy	Contam	Seq_count	score_threshold	Score_1	row_id	next_max_score	score_diff	PEP	sumDecoy	rowNumb
66	39	0.000000,0.000000,0.000000,0.993451,0.006549,	NA	NA	b3,b4,y3,b5,y4,b6,y5,b8,y7,y8,y9,y9*,b13,y12,b14,b13,y13,y14,b16,y15,b17,b17-NH3,y3(2+),y8(2+),y9(2+),y10(2+),b14(2+),y13(2+),b15(2+),b16(2+),y15(2+),b17(2+),y16(2+),y18(2+),b19(2+),b20(2+),y19(2+),b23(2+),b24(2+),b25(2+),b25(2+),y24(2+),b27(2+),b28(2+),y27(2+),b30(2+),	290.149906,361.187016,409.219391,460.255426,522.303451,557.308186,650.362031,745.387896,876.457381,1043.455742,1114.492852,1016.497582,1320.621856,1339.604182,1391.658966,1400.588187,1436.656942,1537.704622,1559.748836,1634.757382,1687.807416,1670.780867,489.185722,1043.455742,1114.492852,1185.529962,1391.658966,1436.656942,1488.711726,1559.748836,1634.757382,1687.807416,1731.810142,1930.905832,1…	7262	0	43.92	AFAAVPTSHPPEDAPAQPPTPGPAASPEQLSFR	4	3418.61	218.125	577	Phosphorylation(1)	NA	NA	1	0	0	0	1168	50.6744	218.125	14524	49.0965	169.028	6.9002801588288e-38	0	94
68	37	0.000000,0.000000,0.000000,0.998766,0.001234,	NA	NA	b4,y3,b5,y4,y6,y7,b9,y8,y8*,y10,y9,y9*,y10,b13,y12,b14,y13,y13*,b14,b14,b16,y15,b17,y16,y16-H2O,y16-NH3,y16*,b20,b20-NH3,y8(2+),y10(2+),y13(2+),y15(2+),b17(2+),y16(2+),y17(2+),y18(2+),b20(2+),y19(2+),b20(2+),y21(2+),b25(2+),y24(2+),b27(2+),y28(2+),y29(2+),b31(2+),y30(2+),y31(2+),	361.187016,409.219391,460.255426,522.303451,779.404621,876.457381,882.446806,1043.455742,945.460472,1105.563631,1114.492852,1016.497582,1185.529962,1320.621856,1339.604182,1391.658966,1436.656942,1338.661672,1471.625297,1471.625297,1559.748836,1634.757382,1687.807416,1731.810142,1713.799577,1714.783593,1633.814872,1982.960616,1965.934067,1043.455742,1185.529962,1436.656942,1634.757382,1687.807416…	7146	0	43.51	AFAAVPTSHPPEDAPAQPPTPGPAASPEQLSFR	3	3418.61	190.368	577	Phosphorylation(1)	NA	NA	1	0	0	0	1146	50.5918	190.368	14292	61.0665	129.301	8.80298292852683e-27	0	216
65	36	0.000000,0.000000,0.000000,0.999956,0.000043,	NA	NA	b4,y3,y3-H2O,b5,y3,y3*,y4,y5,y5-NH3,y5,y5-NH3,y7,b9,y8,y9,y9*,y11,b13,y12,y12-H2O,b14,y13,y13*,b14,b16,b16-H2O,b17,y16,y16-NH3,y16*,b17,y18,b20,b20-NH3,y8(2+),b10(2+),b13(2+),y13(2+),b17(2+),y16(2+),y17(2+),y19(2+),y19(2+),y20(2+),b22(2+),b23(2+),b25(2+),y23(2+),b25(2+),y24(2+),b27(2+),y28(2+),b30(2+),y30(2+),	361.187016,409.219391,391.208826,460.255426,489.185722,391.190452,522.303451,650.362031,633.335482,650.362031,633.335482,876.457381,882.446806,1043.455742,1114.492852,1016.497582,1282.582722,1320.621856,1339.604182,1321.593617,1391.658966,1436.656942,1338.661672,1471.625297,1559.748836,1541.738272,1687.807416,1731.810142,1714.783593,1633.814872,1767.773747,1930.905832,1982.960616,1965.934067,1043…	7243	0	43.86	AFAAVPTSHPPEDAPAQPPTPGPAASPEQLSFR	3	3418.61	188.884	577	Phosphorylation(1)	NA	NA	1	0	0	0	1155	50.6258	188.884	14486	41.8695	147.014	3.03551433301873e-26	0	237
67	35	0.157889,0.842074,0.000037,	NA	NA	b4,b5,y4,y4-NH3,y5,y6,y7,b9,b9-H2O,y8,y8,y8-H2O,y8-NH3,y10,y11,b12,b13,b13,y13,y15,y15-H2O,b16,y16,b17,b17,b17,b18,y18,y19,y8(2+),b13(2+),y13(2+),y16(2+),y16(2+),b17(2+),y19(2+),b20(2+),y20(2+),y21(2+),y23(2+),b26(2+),y24(2+),y25(2+),b28(2+),y27(2+),y28(2+),y29(2+),y30(2+),y31(2+),	361.187016,460.255426,522.303451,505.276902,650.362031,779.404621,876.457381,882.446806,864.436242,963.489411,985.471354,967.460789,968.444805,1105.563631,1202.616391,1205.594916,1320.621856,1342.603799,1356.690611,1554.791051,1536.780486,1581.730779,1651.843811,1687.807416,1687.807416,1709.789359,1806.842119,1850.939501,1969.974204,963.489411,1342.603799,1356.690611,1651.843811,1673.825754,1709.…	6985	0	42.94	AFAAVPTSHPPEDAPAQPPTPGPAASPEQLSFR	3	3360.63	172.918	577	Sodium adduct(1)	NA	NA	1	0	0	0	1339	51.2678	172.918	13970	45.1835	127.735	8.05937460206229e-21	0	418
65	34	0.000000,0.000000,0.000000,0.998766,0.001234,	NA	NA	b3,b4,y3,b5,y4,b6,y5,y7,y8,y9,y11,b13,y12,b14,b13,y13,y13-H2O,y13*,y14,b16,b16-H2O,b17,b17-NH3,y16,y16-H2O,y16-NH3,y3(2+),y7(2+),y8(2+),y11(2+),y12(2+),y13(2+),b16(2+),y15(2+),b17(2+),y16(2+),b18(2+),b19(2+),b20(2+),y19(2+),y21(2+),b25(2+),b25(2+),b27(2+),b28(2+),	290.149906,361.187016,409.219391,460.255426,522.303451,557.308186,650.362031,876.457381,1043.455742,1114.492852,1282.582722,1320.621856,1339.604182,1391.658966,1400.588187,1436.656942,1418.646377,1338.661672,1537.704622,1559.748836,1541.738272,1687.807416,1670.780867,1731.810142,1713.799577,1714.783593,489.185722,876.457381,1043.455742,1282.582722,1339.604182,1436.656942,1559.748836,1634.757382,1…	7166	0	43.58	AFAAVPTSHPPEDAPAQPPTPGPAASPEQLSFR	4	3418.62	168.426	577	Phosphorylation(1)	NA	NA	1	0	0	0	1192	50.7628	168.426	14332	50.6414	117.785	2.05837960202288e-19	0	470
66	30	0.000000,0.000000,0.959925,0.033747,0.006328,	0.085714,0.457143,0.457143,	NA	b3,b4,y3,b5,y3,y4,y4-H2O,y5,b9,b13,y13,y13-H2O,b14,y14,y14-NH3,y14*,y14,b16,y14,b16,y16,b17,y16,y3(2+),y6(2+),y8(2+),y10(2+),b13(2+),y13(2+),b14(2+),y13(2+),y14(2+),b16(2+),b15(2+),y15(2+),y15(2+),y16(2+),b18(2+),y19(2+),b21(2+),y20(2+),b22(2+),b23(2+),y21(2+),b24(2+),b25(2+),y23(2+),y24(2+),b27(2+),b27(2+),y28(2+),b31(2+),	290.149906,361.187016,409.219391,460.255426,489.185722,522.303451,504.292886,730.328362,962.413137,1320.621856,1378.672554,1360.661989,1391.658966,1537.704622,1520.678073,1439.709352,1559.686565,1559.748836,1559.686565,1559.748836,1651.843811,1687.807416,1753.792085,489.185722,779.404621,1043.455742,1105.563631,1320.621856,1356.690611,1391.658966,1436.656942,1559.686565,1559.748836,1590.660000,16…	7175	0	43.6	AFAAVPTSHPPEDAPAQPPTPGPAASPEQLSFR	4	3440.6	128.461	577	Phosphorylation(1)	Sodium adduct(1)	NA	2	0	0	0	967	49.8543	128.461	14350	39.8201	88.6412	1.2914376277137e-11	0	1148
65	28	0.000000,0.000000,0.006547,0.993223,0.000230,	0.000043,0.000232,0.999725,	NA	b4,y3,y3-H2O,b5,y4,y4-H2O,b6,y5,y5,y7,b9,b9-H2O,b9,b9*,b12,b13,b14,y13,y13*,b17,b17-NH3,b17,y16,y16*,b18,y18,y17,y17-NH3,y18,b20,b20-NH3,b19,b19-H2O,y8(2+),y8(2+),b13(2+),y13(2+),y14(2+),b16(2+),y15(2+),y15(2+),y16(2+),y18(2+),b20(2+),y19(2+),y20(2+),b22(2+),y21(2+),b23(2+),y22(2+),b25(2+),b26(2+),y24(2+),b27(2+),b27(2+),y26(2+),y28(2+),b32(2+),	361.187016,409.219391,391.208826,460.255426,522.303451,504.292886,557.308186,650.362031,730.328362,876.457381,882.446806,864.436242,962.413137,864.417867,1205.594916,1320.621856,1391.658966,1436.656942,1338.661672,1687.807416,1670.780867,1709.789359,1731.810142,1633.814872,1864.826507,1872.921444,1881.850665,1864.824116,1952.887775,1982.960616,1965.934067,1983.861210,1965.850646,985.471354,1043.4…	7178	0	43.61	AFAAVPTSHPPEDAPAQPPTPGPAASPEQLSFR	3	3440.59	113.339	577	Phosphorylation(1)	Sodium adduct(1)	NA	2	0	0	0	877	49.43	113.339	14356	44.5709	68.7677	6.20413962861228e-08	1	1813
67	29	0.000000,0.000000,0.000008,0.998757,0.001234,	NA	NA	b4,y3,b5,y4,y4-H2O,y5,y7,y7,y8,y8,y8-NH3,b10,y10,y12,y12-H2O,y13,y13-NH3,b14,b13,y13,b14,y15,b16,y15,y15-H2O,y15-NH3,b17,b17-H2O,y16,y18,b20,b20-NH3,y8(2+),y10(2+),y12(2+),y13(2+),y15(2+),y16(2+),b19(2+),y19(2+),b24(2+),b25(2+),y24(2+),y24(2+),y27(2+),y28(2+),b30(2+),y29(2+),	361.187016,409.219391,460.255426,522.303451,504.292886,650.362031,876.457381,956.423712,963.489411,1043.455742,1026.429193,1059.465897,1185.529962,1339.604182,1321.593617,1356.690611,1339.664062,1391.658966,1400.588187,1436.656942,1471.625297,1554.791051,1559.748836,1634.757382,1616.746817,1617.730833,1687.807416,1669.796852,1731.810142,1930.905832,1982.960616,1965.934067,1043.455742,1185.529962,…	7344	0	44.21	AFAAVPTSHPPEDAPAQPPTPGPAASPEQLSFR	3	3418.61	117.767	577	Phosphorylation(1)	NA	NA	1	0	0	0	1154	50.6221	117.767	14688	36.0587	81.708	3.73280945946679e-07	1	2000
65	27	0.000043,0.000043,0.999913,0.500000,0.500000,	NA	NA	b3,b4,y3,b5,y4,b6,y5,b7,y6,y6-H2O,y6*,y10,y9,y10,y10-H2O,y12,b14,y13,y13-NH3,y13*,b14,y14,y14*,b17,y15,y15*,y17,b8(2+),y8(2+),b10(2+),y10(2+),y11(2+),y13(2+),b15(2+),b17(2+),y16(2+),b19(2+),y19(2+),b22(2+),b25(2+),b29(2+),	290.149906,361.187016,409.219391,460.255426,522.303451,557.308186,650.362031,658.355866,859.370952,841.360387,761.375682,1105.563631,1114.492852,1185.529962,1167.519397,1259.637851,1391.658966,1436.656942,1419.630393,1338.661672,1551.591628,1617.670953,1519.675683,1687.807416,1714.723713,1616.728443,1779.902391,745.387896,1043.455742,1059.465897,1185.529962,1282.582722,1436.656942,1488.711726,168…	7434	0	44.51	AFAAVPTSHPPEDAPAQPPTPGPAASPEQLSFR	4	3498.58	105.078	577	Phosphorylation(2)	NA	NA	2	0	0	0	636	48.0346	105.078	14868	53.3631	51.7145	3.13680788394891e-06	2	2309
65	24	0.000043,0.000043,0.999913,0.999768,0.000232,	NA	NA	b4,y3,b5,y5,y5-NH3,y7,y7-H2O,b9,b9-H2O,y8,y8-H2O,y8*,y9,y10,y12,y12-H2O,b14,y13,y13*,b14,b14,b16,b17,b17-NH3,y15,y16,y16*,y19,b10(2+),y10(2+),y11(2+),y12(2+),y14(2+),y15(2+),y15(2+),y19(2+),y21(2+),b22(2+),y23(2+),y24(2+),y27(2+),b30(2+),y32(2+),	361.187016,409.219391,460.255426,650.362031,633.335482,876.457381,858.446816,962.413137,944.402573,1043.455742,1025.445177,945.460472,1114.492852,1185.529962,1339.604182,1321.593617,1391.658966,1436.656942,1338.661672,1471.625297,1471.625297,1559.748836,1687.807416,1670.780867,1714.723713,1811.776473,1713.781203,1947.992261,1059.465897,1265.496293,1282.582722,1339.604182,1537.704622,1634.757382,1…	7463	0	44.62	AFAAVPTSHPPEDAPAQPPTPGPAASPEQLSFR	3	3498.58	81.9077	577	Phosphorylation(2)	NA	NA	2	0	0	0	616	47.8958	81.9077	14926	32.6101	49.2976	0.0129103	24	3808
62	33	0.999957,0.000043,	NA	NA	b4,y3,b5,b6,y4,b7,y5,y7,y8,y9,y9-NH3,y11,y11,b14,y13,b16,b16,b17,y14,y14-H2O,y14,b18,b18,b20,y13(2+),b16(2+),y13(2+),b17(2+),b18(2+),y17(2+),b20(2+),b23(2+),y21(2+),y22(2+),b24(2+),y23(2+),b25(2+),y24(2+),b27(2+),y25(2+),y26(2+),b29(2+),	283.140066,347.228891,396.224126,453.245586,494.297301,566.329646,593.365711,747.439931,876.482521,1004.541101,987.514552,1160.630971,1182.612914,1203.597979,1404.752141,1405.706976,1427.688919,1514.720949,1541.811051,1523.800486,1563.792994,1629.797916,1651.779859,1873.919086,1404.752141,1405.706976,1426.734084,1514.720949,1651.779859,1852.934021,1895.901029,2180.049479,2191.017854,2290.086264,2…	9053	0	50.37	AGGPLGLSIVGGSDHSSHPFGVQEPGVFISK	3	3055.52	166.713	577	Sodium adduct(1)	NA	NA	1	0	0	0	1535	51.8611	166.713	18106	51.4536	115.26	2.90383577517028e-18	0	515
63	47	NA	NA	NA	b4,b4-H2O,y3,y3-NH3,y4,y4-H2O,y4-NH3,y5,b7,y6,b8,y7,b9,y8,y8-NH3,y9,b10,b10-NH3,b11,b11-H2O,y10,b12,b12-H2O,b12-NH3,y11,y12,b13,y13,b14,b14-NH3,y14,b15,b15-H2O,y15,y16,y16-NH3,y17,y17-H2O,b18,y18,y18,b19,y19,y19-H2O,b9(2+),b11(2+),y13(2+),b14(2+),b15(2+),y16(2+),y17(2+),b20(2+),b21(2+),b23(2+),b25(2+),b26(2+),y25(2+),b27(2+),b28(2+),b29(2+),b30(2+),	409.219386,391.208822,417.245601,400.219052,530.329661,512.319096,513.303112,631.377341,706.424616,730.445751,820.467546,843.529811,935.494486,957.572741,940.546192,1028.609851,1034.562896,1017.536347,1121.594926,1103.584362,1141.693911,1234.678986,1216.668422,1217.652437,1255.736841,1312.758301,1362.737566,1411.826711,1433.774676,1416.748127,1526.853651,1546.858736,1528.848172,1583.875111,1680.9…	14065	0	74.5	SLAHLALNDVSLQALPGDVGNLANLVTLELR	3	3226.79	331.518	577	NA	NA	NA	0	0	0	0	492	46.9197	331.518	28130	54.199	277.319	4.21549972177644e-46	0	58
62	31	1.000000,0.000000,	NA	NA	y3,b5,b6,y4,b7,y7,b9,b9-H2O,y8,y9,b14,y13,y13-NH3,b16,b16-H2O,y13,b16,b17,b18,b18-H2O,b18,y17,y17-NH3,y12(2+),y13(2+),b16(2+),b16(2+),y14(2+),b18(2+),y17(2+),b21(2+),y21(2+),y22(2+),b24(2+),y23(2+),b25(2+),y24(2+),b27(2+),y26(2+),b29(2+),	347.228891,396.224126,453.245586,494.297301,566.329646,747.439931,766.445736,748.435172,876.482521,1004.541101,1203.597979,1404.752141,1387.725592,1405.706976,1387.696412,1426.734084,1427.688919,1514.720949,1629.797916,1611.787352,1651.779859,1852.934021,1835.907472,1307.699381,1404.752141,1405.706976,1427.688919,1541.811051,1651.779859,1852.934021,1952.922489,2191.017854,2290.086264,2309.092069,…	8962	0	50.02	AGGPLGLSIVGGSDHSSHPFGVQEPGVFISK	3	3055.53	147.016	577	Sodium adduct(1)	NA	NA	1	0	0	0	1567	51.9507	147.016	17924	58.4762	88.5393	7.46263490145382e-13	0	999
48	41	NA	NA	NA	b2,b2-H2O,y2,y2-H2O,y3,y3-H2O,y3-NH3,b4,y4,y4-NH3,b5,y5,b6,y6,b7,y7,b8,y8,b9,y9,y9-H2O,y9-NH3,b10,b10-H2O,y10,y10-H2O,y10-NH3,b11,y11,y11-H2O,y11-NH3,b12,b12-H2O,y12,y12-H2O,y12-NH3,y13,y13-H2O,y13-NH3,y14,y6(2+),b7(2+),b8(2+),y8(2+),b9(2+),y9(2+),b10(2+),b11(2+),b12(2+),y12(2+),y13(2+),b15(2+),b16(2+),b17(2+),b18(2+),b19(2+),b20(2+),y20(2+),	253.093126,235.082562,304.161541,286.150976,417.245601,399.235036,400.219052,461.189146,530.329661,513.303112,560.257556,643.413721,647.289586,714.450831,760.373646,827.534891,873.457706,928.582571,974.505386,1025.635331,1007.624766,1008.608782,1045.542496,1027.531932,1112.667361,1094.656796,1095.640812,1116.579606,1183.704471,1165.693906,1166.677922,1203.611636,1185.601072,1254.741581,1236.73101…	11390	0	60.43	HDHAVSLLTAASPTIALLLER	3	2228.24	334.452	577	NA	NA	NA	0	0	0	0	726	48.6094	334.452	22780	57.0324	277.419	2.45313289170591e-44	0	62
62	28	0.999957,0.000043,	NA	NA	y2,b5,b6,y4,y5,y7,y7-H2O,y8,y9,y9-NH3,y9,y11,y11-NH3,b14,y12,y13,b16,b18,y5(2+),y7(2+),y10(2+),y10(2+),y13(2+),b16(2+),b18(2+),y16(2+),b20(2+),y18(2+),b22(2+),b23(2+),y21(2+),y22(2+),b24(2+),b25(2+),b27(2+),	234.144831,396.224126,453.245586,494.297301,593.365711,747.439931,729.429366,876.482521,1004.541101,987.514552,1026.523044,1160.630971,1143.604422,1203.597979,1307.699381,1404.752141,1405.706976,1651.779859,593.365711,747.439931,1103.609511,1125.591454,1404.752141,1427.688919,1651.779859,1737.857054,1895.901029,1989.942904,2051.990899,2180.049479,2191.017854,2290.086264,2309.092069,2406.144829,25…	8996	0	50.15	AGGPLGLSIVGGSDHSSHPFGVQEPGVFISK	4	3055.52	119.521	577	Sodium adduct(1)	NA	NA	1	0	0	0	1523	51.827	119.521	17992	40.2243	79.2971	5.57644710933017e-07	2	2063
61	27	0.999998,0.000002,	NA	NA	y2,y3,b5,y4,b7,y7,y8,y8-H2O,y9,y9-H2O,y9-NH3,y9,y11,b14,y12,y13,b16,y13,b16,y5(2+),y7(2+),y13(2+),b16(2+),b16(2+),b18(2+),y16(2+),b21(2+),b22(2+),b23(2+),b23(2+),b24(2+),b25(2+),y25(2+),y26(2+),y28(2+),	234.144831,347.228891,396.224126,494.297301,566.329646,747.439931,876.482521,858.471956,1004.541101,986.530536,987.514552,1026.523044,1160.630971,1203.597979,1307.699381,1404.752141,1405.706976,1426.734084,1427.688919,593.365711,747.439931,1404.752141,1405.706976,1427.688919,1651.779859,1715.875111,1952.922489,2051.990899,2158.067536,2180.049479,2309.092069,2406.144829,2603.286414,2660.307874,287…	9085	0	50.49	AGGPLGLSIVGGSDHSSHPFGVQEPGVFISK	4	3055.52	112.951	577	Sodium adduct(1)	NA	NA	1	0	0	0	1557	51.9229	112.951	18170	42.9408	70.0102	7.25378882352793e-06	2	2451
29	21	0.033962,0.966038,	NA	NA	y1,y1-NH3,b2,y2,y2-H2O,b3,b3-H2O,y3,b4,y4,y6,y6-H2O,y6-NH3,y7,y7-H2O,y7-NH3,b7,b9,b9-H2O,y9,b10,b10-NH3,b11,y4(2+),y9(2+),b10(2+),y10(2+),b11(2+),y11(2+),b12(2+),y12(2+),	175.118951,158.092402,185.128446,262.150981,244.140416,314.171036,296.160472,375.235041,427.255096,472.287801,643.352191,625.341626,626.325642,730.384221,712.373656,713.357672,782.369499,926.422989,908.412425,992.479571,1040.465919,1023.439370,1137.518679,472.287801,1014.461514,1040.465919,1085.498624,1137.518679,1198.582684,1250.602739,1327.625274,	8648	0	48.86	ALEIADFSGNPLSR	3	1511.75	147.156	577	Sodium adduct(1)	NA	NA	1	0	0	0	891	49.4988	147.156	17296	51.4301	95.7259	2.3076928672646e-09	0	1486
26	19	1.000000,	NA	NA	b3,y3,b4,y4,b5,y5,y5-NH3,b6,y6,b7,b7-NH3,y7,b8,b8-NH3,y8,b9,b9-NH3,y9,y9-NH3,b10,b10-H2O,b10-NH3,y10,y10-NH3,y11,y11-NH3,b12,b13,b13-NH3,	371.207756,435.238416,484.291816,532.291176,555.328926,660.349756,643.323207,684.371516,731.386866,798.414446,781.387897,859.445446,926.473026,909.446477,973.488376,997.510136,980.483587,1102.530966,1085.504417,1125.568716,1107.558152,1108.542167,1173.568076,1156.541527,1286.652136,1269.625587,1369.656881,1482.740941,1465.714392,	7635	0	45.24	ALWLAENQAQPMLR	2	1656.85	134.851	577	Met_OX(1)	NA	NA	1	0	0	0	1009	50.0389	134.851	15270	36.2107	98.6404	1.95083774737716e-14	0	804
29	20	1.000000,	NA	NA	y1,b2,y2,b3,b4,y4,y5,b6,y6,b8,b8-NH3,b9,b9-H2O,b10,b10-NH3,b3(2+),y4(2+),y5(2+),b9(2+),b10(2+),y10(2+),y11(2+),y12(2+),	175.118951,185.128446,288.203011,371.207756,484.291816,516.296261,644.354841,706.353459,715.391951,948.454969,931.428420,1019.492079,1001.481515,1147.550659,1130.524110,371.207756,516.296261,644.354841,1019.492079,1147.550659,1179.555104,1292.639164,1478.718474,	8529	0	48.41	ALWLAENQAQPMLR	3	1662.84	133.901	577	Sodium adduct(1)	NA	NA	1	0	0	0	1037	50.1578	133.901	17058	63.3015	70.5999	1.29638885736542e-06	2	2177
47	39	NA	NA	NA	y2,y2-H2O,y2-NH3,b3,b3-H2O,y3,b4,y4,y5,b5,b5-H2O,b5-NH3,y6,y6-H2O,b6,b6-H2O,b6-NH3,y7,b7,b7-H2O,y8,y8-H2O,b8,b8-H2O,b8-NH3,y9,y9-NH3,b9,b9-H2O,b9-NH3,y10,y10-H2O,y11,y11-NH3,b11,y12,b12,y13,b13,y14,y14-H2O,y15,y16,b16,b7(2+),b8(2+),b9(2+),y11(2+),y13(2+),y14(2+),y15(2+),y17(2+),y18(2+),b19(2+),y19(2+),b20(2+),b22(2+),	276.155391,258.144826,259.128842,286.176126,268.165562,347.192501,399.260186,418.229611,489.266721,527.318766,509.308202,510.292217,618.309311,600.298746,674.387176,656.376612,657.360627,747.351901,787.471236,769.460672,818.389011,800.378446,916.513826,898.503262,899.487277,933.415951,916.389402,987.550936,969.540372,970.524387,1062.458541,1044.447976,1177.485481,1160.458932,1197.687756,1234.5069…	11651	0	61.67	VSVIQFLEAPIGDEDAEEAAAEK	3	2431.19	308.588	577	NA	NA	NA	0	0	0	0	1598	52.0358	308.588	23302	64.906	243.682	1.78419058992513e-37	0	97
26	15	1.000000,	NA	NA	y2,y2-NH3,b3,b4,y4,y4-NH3,y5,b6,y6,b7,b8,y8,b9,b10,b10-NH3,y11,y11-NH3,b12,b12-H2O,b13,b13-H2O,b13-NH3,	288.203011,271.176462,371.207756,484.291816,532.291176,515.264627,660.349756,684.371516,731.386866,798.414446,926.473026,973.488376,997.510136,1125.568716,1108.542167,1286.652136,1269.625587,1369.656881,1351.646317,1482.740941,1464.730377,1465.714392,	7729	0	45.6	ALWLAENQAQPMLR	2	1656.85	85.8127	577	Met_OX(1)	NA	NA	1	0	0	0	1043	50.1828	85.8127	15458	51.4564	34.3563	0.0147912	24	3836
43	37	NA	NA	NA	y2,y2-NH3,b3,y3,y3-H2O,y3-NH3,y4,y4-H2O,b4,y5,y5-H2O,y6,y6-H2O,b6,y7,y8,y9,b9,b9,y10,y10-NH3,b10,y11,y12,y12-H2O,b15,y15,b16,b16-H2O,b7(2+),b8(2+),y9(2+),b9(2+),b10(2+),b11(2+),b12(2+),b13(2+),b14(2+),b15(2+),y16(2+),b16(2+),b17(2+),b18(2+),b19(2+),b20(2+),b21(2+),	288.203011,271.176462,365.193176,375.235041,357.224476,358.208492,488.319101,470.308536,494.235766,587.387511,569.376946,674.419541,656.408976,678.356936,787.503601,858.540711,957.609121,1001.505046,1001.505046,1060.618311,1043.591762,1114.589106,1117.639771,1174.661231,1156.650666,1501.746736,1513.840641,1614.830796,1596.820232,775.409696,872.462456,957.609121,1001.505046,1114.589106,1171.610566…	12187	0	64.19	NHLEALPPEIGGCVALSVLSLR	3	2288.24	304.818	577	NA	NA	NA	0	0	0	0	974	49.8856	304.818	24374	66.6642	238.154	3.28146607966445e-36	0	105
26	15	1.000000,	NA	NA	y2,y2-NH3,b3,y4,y4-NH3,y5,b6,b6-H2O,y6,y7,b8,b8-NH3,y8,b9,b9-NH3,b10,b10-H2O,b10-NH3,y11,b12,b12-NH3,y12,y12-NH3,b13,b13-NH3,	288.203011,271.176462,371.207756,532.291176,515.264627,660.349756,684.371516,666.360952,731.386866,859.445446,926.473026,909.446477,973.488376,997.510136,980.483587,1125.568716,1107.558152,1108.542167,1286.652136,1369.656881,1352.630332,1472.731446,1455.704897,1482.740941,1465.714392,	7833	0	45.97	ALWLAENQAQPMLR	2	1656.85	85.8127	577	Met_OX(1)	NA	NA	1	0	0	0	1046	50.1953	85.8127	15666	51.4301	34.3826	0.0147912	24	3837
26	15	1.000000,	NA	NA	y2,y2-NH3,b3,b4,y4,y4-NH3,b5,y5,b6,y6,b7,b7-H2O,b8,y8,y8-NH3,b9,b10,b12,b12-NH3,b13,	288.203011,271.176462,371.207756,484.291816,516.296261,499.269712,555.328926,644.354841,706.353459,715.391951,820.396389,802.385825,948.454969,957.493461,940.466912,1019.492079,1147.550659,1375.643909,1358.617360,1488.727969,	8519	0	48.36	ALWLAENQAQPMLR	2	1662.84	85.8127	577	Sodium adduct(1)	NA	NA	1	0	0	0	1030	50.1284	85.8127	17038	38.3221	47.4906	0.0147912	24	3838
44	21	0.499998,0.499998,0.000004,	NA	NA	y2,y2-NH3,y3,b4,b4,b4-H2O,b5,b5,y5,b6,y6,y6-H2O,b6,b6-H2O,b6-NH3,y10,y10-H2O,b11,b11-NH3,b12,b12-NH3,y12,b15,b6(2+),y10(2+),y11(2+),b13(2+),y15(2+),y17(2+),b17(2+),b19(2+),b20(2+),b21(2+),b22(2+),	274.187361,257.160812,387.271421,425.177916,447.159859,429.149295,553.236496,575.218439,587.387511,682.279086,700.471571,682.461006,704.261029,686.250465,687.234480,1142.660171,1124.649606,1145.519749,1128.493200,1258.603809,1241.577260,1411.845341,1592.784926,682.279086,1142.660171,1298.761281,1414.704919,1682.998541,1853.104061,1856.893519,2057.009609,2170.093669,2283.177729,2382.246139,	12771	0	67.16	DATHQEAVSALLRPCLELSLLVR	3	2556.36	96.9565	577	Sodium adduct(1)	NA	NA	1	1	0	0	1218	50.8565	96.9565	25542	54.5835	42.373	0.0166254	24	3862
54	37	NA	NA	NA	y4,y4-NH3,b5,b5-H2O,y5,y5-NH3,b6,b6-H2O,b6-NH3,b7,b7-H2O,y6,y7,y8,b10,b10-NH3,y9,y9-H2O,y9-NH3,b11,b11-H2O,b11-NH3,y10,b12,b12-H2O,b12-NH3,y11,b13,b13-NH3,y12,b15,y13,y15,b15(2+),y13(2+),y14(2+),b16(2+),y15(2+),y16(2+),y17(2+),y18(2+),y19(2+),y20(2+),y21(2+),y22(2+),y23(2+),y24(2+),b26(2+),y25(2+),b27(2+),y26(2+),	502.334751,485.308202,506.224526,488.213962,615.418811,598.392262,634.283106,616.272542,617.256557,705.320216,687.309652,716.466491,829.550551,958.593141,1046.490136,1029.463587,1087.635731,1069.625166,1070.609182,1159.574196,1141.563632,1142.547647,1216.678321,1272.658256,1254.647692,1255.631707,1345.720911,1401.700846,1384.674297,1458.804971,1569.790716,1614.906081,1782.995951,1569.790716,1614.…	14520	0	77.43	GVSFDQANNLLIEPARIEEEELTLTILR	3	3183.7	240.823	577	NA	NA	NA	0	1	0	0	938	49.722	240.823	29040	57.0031	183.82	1.50444003430583e-33	0	128
45	37	NA	NA	NA	y2,y2-NH3,b3,b4,b4-H2O,y4,y4-NH3,b5,b5-NH3,y5,b6,b6-NH3,y6,y7,y8,y8-NH3,y9,b9,b9-NH3,y10,b10,b11,y11,y12,b12,y13,b13,y14,y15,b17,y5(2+),y9(2+),y10(2+),y11(2+),y12(2+),y13(2+),y14(2+),y16(2+),b17(2+),y17(2+),y18(2+),y19(2+),y20(2+),y21(2+),	288.203011,271.176462,356.217986,455.286396,437.275832,529.345651,512.319102,569.329326,552.302777,628.414061,697.387906,680.361357,699.451171,828.493761,885.515221,868.488672,1022.574131,1025.562576,1008.536027,1123.621811,1138.646636,1195.668096,1236.705871,1293.727331,1308.752156,1406.811391,1409.799836,1519.895451,1606.927481,1803.959906,628.414061,1022.574131,1123.621811,1236.705871,1293.727…	10623	0	56.81	LLEVNQQSLLGLTHGEAVQLLR	3	2431.37	290.223	577	NA	NA	NA	0	0	0	0	601	47.7887	290.223	21246	51.531	238.692	2.13796386437245e-32	0	143
45	37	NA	NA	NA	b2,y2,b3,b3-H2O,y3,b4,y4,b5,b5-NH3,y5,b6,b6-NH3,y6,b7,y7,y8,y8-NH3,b8,y9,y10,b10,b10-NH3,y11,y12,b12,y13,y14,y15,b4(2+),y9(2+),y10(2+),y11(2+),y12(2+),y13(2+),y14(2+),b14(2+),y16(2+),y17(2+),y18(2+),y19(2+),y20(2+),y21(2+),	227.175396,288.203011,356.217986,338.207422,401.287071,455.286396,529.345651,569.329326,552.302777,628.414061,697.387906,680.361357,699.451171,825.446486,828.493761,885.515221,868.488672,912.478516,1022.574131,1123.621811,1138.646636,1121.620087,1236.705871,1293.727331,1308.752156,1406.811391,1519.895451,1606.927481,455.286396,1022.574131,1123.621811,1236.705871,1293.727331,1406.811391,1519.89545…	10700	0	57.18	LLEVNQQSLLGLTHGEAVQLLR	3	2431.37	290.223	577	NA	NA	NA	0	0	0	0	632	48.0072	290.223	21400	57.2928	232.93	2.13796386437245e-32	0	144
20	14	0.000618,0.499691,0.499691,	NA	NA	y2,y2-H2O,y2-NH3,b2,b2-H2O,b3,b3-H2O,b3,y3,b4,b4,y4,y6,b7,b7-H2O,y7,y7,b8,y8,y8,y8-H2O,y8-NH3,b9,y9,y9-H2O,b10,y10,y10,	234.144831,216.134266,217.118282,235.068919,217.058355,314.134656,296.124092,336.116599,347.228891,429.161596,451.143539,494.297301,664.402821,750.291649,732.281085,793.445411,815.427354,897.360059,908.472351,930.454294,912.443729,913.427745,1010.444119,1031.501974,1013.491409,1097.476149,1106.572791,1128.554734,	5877	0	38.93	DPTDEGIFISK	2	1243.58	96.6662	577	Sodium adduct(1)	NA	NA	1	0	0	0	543	47.348	96.6662	11754	56.8904	39.7758	0.00090123	10	3256
32	17	0.333196,0.333196,0.333196,0.000412,	NA	NA	y4,y4-NH3,b3,y5,b4,b4-H2O,b5,b5-H2O,y6,b6,b6-H2O,b6,b6-H2O,b7,y8,b8,b8-H2O,y9,y9-H2O,b9,y11,y11-H2O,b11,b11-H2O,y13,y13-H2O,b13,b13-H2O,b13-NH3,b16,b16-H2O,b16-NH3,	386.214631,369.188082,394.158459,499.298691,523.201049,505.190485,580.222509,562.211945,600.346371,686.299146,668.288582,708.281089,690.270525,805.333849,883.478441,934.376439,916.365875,954.515551,936.504986,1005.413549,1180.610901,1162.600336,1288.545619,1270.535055,1365.690941,1347.680376,1502.677359,1484.666795,1485.650810,1713.773039,1695.762475,1696.746490,	7470	0	44.64	EIEEGQPEAPWTLPGGR	2	1887.88	88.9207	577	Sodium adduct(1)	NA	NA	1	0	0	0	1032	50.1368	88.9207	14940	29.3096	59.6111	0.00100496	10	3272
36	24	0.999998,0.000002,0.000000,	NA	NA	y3,y3-NH3,y4,y5,y6,b6,b6-H2O,b6-NH3,y7,b7,y8,b8,b8-NH3,y9,y10,y10-NH3,b9,b10,y11,y12,b12,y13,b13,b13-NH3,y14,b14,b15,b15-H2O,b15-NH3,y16,b16,b17,b17-NH3,b18,y18,	303.177521,286.150972,374.214631,503.257221,604.304901,608.303841,590.293277,591.277292,675.342011,739.398466,786.374036,858.446811,841.420262,901.437361,958.458821,941.432272,1044.526121,1101.547581,1144.538131,1281.597041,1327.642931,1394.681101,1398.680041,1381.653492,1495.728781,1499.727721,1628.770311,1610.759747,1611.743762,1680.808821,1699.807421,1770.844531,1753.817982,1827.865991,1890.94…	8052	0	46.72	ELPGQTLHWGPEATEAAGR	2	2001.98	154.28	577	Pyro-glu from E(1)	NA	NA	1	0	0	0	1327	51.2287	154.28	16104	41.7957	112.484	3.34178246378454e-24	0	278
34	29	NA	NA	NA	b3,y3,b4,y4,b5,y5,b6,b6-H2O,y6,y6-NH3,b7,b7-NH3,y7,b8,b8-NH3,y8,b9,y9,y9-NH3,b10,y10,b11,b11-NH3,y11,b12,b12-NH3,y12,y12-NH3,b13,b13-H2O,b13-NH3,y13,b14,b14-H2O,y14,b15,b15-NH3,b15,b15-NH3,y15,b16,b16-H2O,y16,y16-H2O,y16-NH3,	308.196856,361.219391,437.239446,476.246331,536.307856,589.330391,607.344966,589.334402,718.372981,701.346432,721.387896,704.361347,817.441391,868.456306,851.429757,930.525451,999.496796,1058.584031,1041.557482,1127.555376,1189.624521,1240.639436,1223.612887,1336.692931,1339.707846,1322.681297,1450.735861,1433.709312,1468.750436,1450.739872,1451.723887,1521.772971,1581.834496,1563.823932,1620.841…	13934	0	73.8	LPPEVANFMQLVELDVSR	2	2057.08	237.763	577	NA	NA	NA	0	0	0	0	1217	50.8529	237.763	27868	37.5911	200.171	4.21869637199381e-29	0	184
45	36	NA	NA	NA	b2,y2,y2-NH3,y3,y4,y4-NH3,b5,y5,y6,b7,y7,b8,y8,b9,y9,y9-H2O,y9-NH3,b10,b10-H2O,y10,y10-H2O,b11,y11,y11-H2O,y11-NH3,b12,b12-H2O,y12,y12-H2O,y12-NH3,y13,y13-H2O,y13-NH3,b14,b5(2+),b7(2+),b8(2+),y8(2+),b9(2+),y9(2+),b10(2+),b11(2+),b12(2+),y13(2+),b16(2+),b17(2+),b18(2+),b19(2+),b20(2+),	253.093126,304.161541,287.134992,417.245601,530.329661,513.303112,560.257556,643.413721,714.450831,760.373646,827.534891,873.457706,928.582571,974.505386,1025.635331,1007.624766,1008.608782,1045.542496,1027.531932,1112.667361,1094.656796,1116.579606,1183.704471,1165.693906,1166.677922,1203.611636,1185.601072,1254.741581,1236.731016,1237.715032,1355.789261,1337.778696,1338.762712,1401.712076,560.2…	11312	0	60.05	HDHAVSLLTAASPTIALLLER	3	2228.24	274.524	577	NA	NA	NA	0	0	0	0	726	48.6094	274.524	22624	60.5475	213.977	2.58738119165782e-28	0	191
63	42	NA	NA	NA	y3,y3-H2O,y3-NH3,y4,b6,y5,y5-NH3,b7,y6,y7,b9,y8,y9,b10,b10-H2O,b11,b11-H2O,b11-NH3,y10,b12,b12-H2O,b12-NH3,y11,y12,b13,y13,b14,y14,b15,y15,y16,y16-H2O,y16-NH3,b17,b17-H2O,b17-NH3,y17,y17-NH3,b18,b19,b20,b12(2+),b13(2+),y13(2+),b14(2+),y16(2+),y17(2+),b18(2+),y18(2+),b21(2+),b23(2+),b25(2+),b27(2+),b28(2+),b30(2+),	417.245601,399.235036,400.219052,530.329661,593.340556,631.377341,614.350792,706.424616,730.445751,843.529811,935.494486,957.572741,1028.609851,1034.562896,1016.552332,1121.594926,1103.584362,1104.568377,1141.693911,1234.678986,1216.668422,1217.652437,1255.736841,1312.758301,1362.737566,1411.826711,1433.774676,1526.853651,1546.858736,1583.875111,1680.927871,1662.917306,1663.901322,1700.932956,168…	14002	0	74.13	SLAHLALNDVSLQALPGDVGNLANLVTLELR	3	3226.79	264.956	577	NA	NA	NA	0	0	0	0	531	47.2509	264.956	28004	58.3129	206.643	3.74589431590126e-28	0	192
28	29	NA	NA	NA	y1,b2,y2,b3,y3,b4,y4,y4-NH3,b5,b5-H2O,y5,y5-NH3,b6,b6-H2O,y6,y6-NH3,b7,b7-H2O,y7,y7-H2O,y7-NH3,b8,b8-H2O,y8,y8-H2O,b9,b9-H2O,b10,b11,b11-H2O,b4(2+),y4(2+),y5(2+),b6(2+),y6(2+),b7(2+),y7(2+),y8(2+),b9(2+),y11(2+),b12(2+),	175.118951,201.123366,288.203011,330.165956,416.261591,459.208546,530.304521,513.277972,572.292606,554.282042,601.341631,584.315082,685.376666,667.366102,716.368571,699.342022,798.460726,780.450162,829.452631,811.442066,812.426082,913.487666,895.477102,942.536691,924.526126,984.524776,966.514212,1098.567706,1226.626286,1208.615722,459.208546,530.304521,601.341631,685.376666,716.368571,798.460726,…	10825	0	57.82	SLEELLLDANQLR	3	1513.82	280	577	NA	NA	NA	0	0	0	0	686	48.3632	280	21650	96.5102	183.49	7.63912276351169e-28	0	201
36	21	0.999990,0.000008,0.000002,	NA	NA	y4,y4-NH3,b5,b6,y7,b7,b8,y10,b9,b9,b10,y11,y11-H2O,b11,y12,b12,b12-H2O,b12-NH3,y13,b13,y14,y14-H2O,b14,b14-H2O,b14-NH3,b15,b15-H2O,b15-NH3,b16,b17,b18,b18-H2O,	374.214631,357.188082,547.248669,648.296349,675.342011,761.380409,898.439319,958.458821,1062.536686,1084.518629,1141.540089,1144.538131,1126.527566,1238.592849,1281.597041,1367.635439,1349.624875,1350.608890,1394.681101,1438.672549,1495.728781,1477.718216,1539.720229,1521.709665,1522.693680,1668.762819,1650.752255,1651.736270,1739.799929,1810.837039,1867.858499,1849.847935,	6382	0	40.74	ELPGQTLHWGPEATEAAGR	2	2041.97	119.068	577	Sodium adduct(1)	NA	NA	1	0	0	0	1281	51.0755	119.068	12764	65.404	53.6636	2.08052720572331e-11	0	1160
56	36	NA	NA	NA	y3,y4,b5,y5,b7,b7-H2O,b7-NH3,y6,y7,y8,b10,b10-NH3,y9,y9-H2O,b11,b11-H2O,b11-NH3,y10,b12,b12-NH3,y11,b13,y12,b15,b16,y5(2+),b8(2+),y7(2+),b15(2+),y13(2+),y15(2+),y16(2+),y17(2+),y18(2+),y19(2+),y20(2+),y21(2+),y22(2+),y23(2+),b24(2+),y24(2+),b27(2+),y26(2+),	401.287071,502.334751,506.224526,615.418811,705.320216,687.309652,688.293667,716.466491,829.550551,958.593141,1046.490136,1029.463587,1087.635731,1069.625166,1159.574196,1141.563632,1142.547647,1216.678321,1272.658256,1255.631707,1345.720911,1401.700846,1458.804971,1569.790716,1725.891826,615.418811,819.363146,829.550551,1569.790716,1614.906081,1782.995951,1912.038541,2025.122601,2138.206661,2251…	12949	0	68.08	GVSFDQANNLLIEPARIEEEELTLTILR	3	3183.7	219.932	577	NA	NA	NA	0	1	0	0	928	49.6755	219.932	25898	51.5689	168.363	3.02583605057316e-27	0	208
38	20	0.965997,0.033961,0.000042,	NA	NA	y2,y3,y3-NH3,y4,y5,y6,y6-NH3,b7,y8,y9,b9,b10,b10-NH3,b12,b13,b4(2+),y5(2+),y9(2+),y9(2+),y10(2+),y10(2+),y12(2+),y12(2+),y13(2+),y14(2+),y14(2+),b14(2+),b15(2+),y16(2+),b17(2+),	232.140411,303.177521,286.150972,374.214631,503.257221,604.304901,587.278352,739.398466,786.374036,901.437361,1044.526121,1101.547581,1084.521032,1327.642931,1398.680041,397.208146,503.257221,883.426796,901.437361,940.448256,958.458821,1263.586476,1281.597041,1394.681101,1477.718216,1495.728781,1499.727721,1628.770311,1680.808821,1770.844531,	8062	0	46.75	ELPGQTLHWGPEATEAAGR	3	2001.98	102.546	577	Pyro-glu from E(1)	NA	NA	1	0	0	0	1283	51.0823	102.546	16124	46.0328	56.513	0.0215519	27	3975
49	28	0.000000,0.000000,0.000000,0.000003,0.000013,0.000013,0.058156,0.310166,0.310166,0.310166,0.010904,0.000383,0.000013,0.000013,	NA	NA	b3,y3,y3-NH3,y4,y4-NH3,y5,y6,b7,b7,y7,b9,b10,b10-NH3,y12,y13,b12,b12-H2O,y14,y15,y16,y16-NH3,b16,b18,y9(2+),y9(2+),y10(2+),y13(2+),y15(2+),y16(2+),y17(2+),y18(2+),y18(2+),y19(2+),y20(2+),b22(2+),y22(2+),b23(2+),y23(2+),b24(2+),b24(2+),	340.186686,357.249621,340.223072,485.308201,468.281652,598.392261,655.413721,739.398466,753.414116,811.514831,1062.536686,1119.558146,1102.531597,1254.716431,1325.753541,1345.653496,1327.642932,1440.780481,1551.848891,1608.870351,1591.843802,1717.817986,1845.876556,939.573401,953.589051,1024.626161,1311.737891,1551.848891,1608.870351,1794.949661,1917.992921,1932.008571,2045.092631,2146.140311,231…	7416	0	44.45	ELPGQTLHWGPEATEAAGRGLQPLK	3	2670.4	153.331	577	Methylation(1)	NA	NA	1	1	0	0	1272	51.0449	153.331	14832	60.5475	92.7837	5.27730031443621e-13	0	987
16	12	1.000000,	NA	NA	b2,y1,b3,b4,b4-H2O,y2,b5,b5-H2O,y4,b7,b7-H2O,b7-NH3,y5,y5-NH3,y6,y6-NH3,b8,b8-H2O,y7,y7-H2O,y7-NH3,	129.065846,175.118951,186.087306,287.134986,269.124422,322.154356,358.172096,340.161532,549.281346,585.299086,567.288522,568.272537,620.318456,603.291907,721.366136,704.339587,732.334491,714.323927,778.387596,760.377031,761.361047,	318	0	16.32	GAGTAVQMR	2	906.446	89.0801	577	Met_OX(1)	NA	NA	1	0	0	0	243	43.8561	89.0801	636	42.9947	46.0855	0.0267921	27	4023
41	31	NA	NA	NA	b2,b3,b3-H2O,b3-NH3,y4,b4,b4-H2O,b4-NH3,y5,b5,b5-NH3,y6,y7,b10,y10,y11,b11,b11-H2O,b11-NH3,b12,b12-NH3,b13,b13-NH3,y5(2+),b5(2+),y6(2+),y7(2+),y8(2+),y10(2+),y11(2+),y12(2+),y13(2+),b13(2+),y14(2+),b14(2+),y15(2+),y16(2+),y17(2+),y18(2+),y19(2+),	202.082236,315.166296,297.155732,298.139747,358.208481,444.208886,426.198322,427.182337,487.251071,531.240916,514.214367,584.303831,671.335861,1046.500036,1069.563621,1184.590561,1202.601146,1184.590582,1185.574597,1331.643736,1314.617187,1444.727796,1427.701247,487.251071,531.240916,584.303831,671.335861,784.419921,1069.563621,1184.590561,1297.674621,1384.706651,1444.727796,1471.738681,1531.7598…	7322	0	44.13	NSLESISSIDRELSPEGPGK	3	2115.06	223.927	577	NA	NA	NA	0	1	0	0	1345	51.2872	223.927	14644	65.9326	157.994	7.90310173994381e-26	0	241
16	12	1.000000,	NA	NA	y1,b3,b4,b4-H2O,b4,b4-H2O,y2,b5,b5-H2O,y4,b7,b7-H2O,b7-NH3,y5,y5-NH3,y6,y6-NH3,b8,b8-H2O,b8-NH3,y7,y7-H2O,	175.118951,186.087306,287.134986,269.124422,287.134986,269.124422,322.154356,358.172096,340.161532,549.281346,585.299086,567.288522,568.272537,620.318456,603.291907,721.366136,704.339587,732.334491,714.323927,715.307942,778.387596,760.377031,	359	0	16.69	GAGTAVQMR	2	906.446	89.0801	577	Met_OX(1)	NA	NA	1	0	0	0	243	43.8561	89.0801	718	42.9947	46.0855	0.0267921	27	4024
34	28	NA	NA	NA	y3,y3-H2O,y3-NH3,b4,y4,b5,y5,b6,b6-H2O,y6,y6-H2O,b7,b7-NH3,y7,b8,b8-NH3,y8,b9,b9-NH3,y9,y9-H2O,y9-NH3,b10,b10-NH3,y10,y10-H2O,b11,b11-NH3,y11,b12,b12-H2O,b12-NH3,y12,y12-H2O,b13,b13-H2O,b13-NH3,y13,b14,y14,b15,b15-NH3,y15,y15-NH3,b16,b16-H2O,b16-NH3,y16,y16-NH3,b17,b17-H2O,b17-NH3,	361.219391,343.208826,344.192842,437.239446,476.246331,536.307856,589.330391,607.344966,589.334402,718.372981,700.362416,721.387896,704.361347,817.441391,868.456306,851.429757,930.525451,999.496796,982.470247,1058.584031,1040.573466,1041.557482,1127.555376,1110.528827,1189.624521,1171.613956,1240.639436,1223.612887,1336.692931,1339.707846,1321.697282,1322.681297,1450.735861,1432.725296,1468.75043…	13695	0	72.37	LPPEVANFMQLVELDVSR	2	2057.08	221.358	577	NA	NA	NA	0	0	0	0	1127	50.5192	221.358	27390	33.426	187.932	5.12610681367793e-25	0	266
16	12	1.000000,	NA	NA	b2,y1,b3,b4,b4-H2O,y2,b5,b5-H2O,y4,b7,b7-H2O,y5,y6,b8,b8-H2O,b8-NH3,y7,	129.065846,175.118951,186.087306,287.134986,269.124422,322.154356,358.172096,340.161532,549.281346,585.299086,567.288522,620.318456,721.366136,732.334491,714.323927,715.307942,778.387596,	507	0	17.78	GAGTAVQMR	2	906.446	89.0801	577	Met_OX(1)	NA	NA	1	0	0	0	243	43.8561	89.0801	1014	47.6423	41.4379	0.0267921	27	4025
38	32	NA	NA	NA	y2,y3,b4,y4,y4-H2O,b5,y5,b6,b6-H2O,y6,y6-H2O,y6-NH3,b7,y7,b8,b8-NH3,y8,b9,b9-H2O,y9,y9-NH3,b10,b10-NH3,b11,b11-NH3,b12,b12-H2O,b12-NH3,b13,y5(2+),y6(2+),b7(2+),y7(2+),y8(2+),b9(2+),b10(2+),b11(2+),b12(2+),b13(2+),b14(2+),b16(2+),y16(2+),b17(2+),	262.150981,361.219391,437.239446,476.246331,458.235766,536.307856,589.330391,607.344966,589.334402,718.372981,700.362416,701.346432,721.387896,817.441391,868.456306,851.429757,930.525451,999.496796,981.486232,1058.584031,1041.557482,1127.555376,1110.528827,1240.639436,1223.612887,1339.707846,1321.697282,1322.681297,1468.750436,589.330391,718.372981,721.387896,817.441391,930.525451,999.496796,1127…	13816	0	73.07	LPPEVANFMQLVELDVSR	3	2057.08	258.247	577	NA	NA	NA	0	0	0	0	1153	50.6183	258.247	27632	67.5074	190.74	5.76710411744899e-24	0	288
16	12	1.000000,	NA	NA	b2,y1,y1-NH3,b3,b4,b4-H2O,y2,b5,b5-H2O,y4,b7,b7-NH3,y5,y5-NH3,y6,b8,y7,	129.065846,175.118951,158.092402,186.087306,287.134986,269.124422,322.154356,358.172096,340.161532,549.281346,585.299086,568.272537,620.318456,603.291907,721.366136,732.334491,778.387596,	601	0	18.47	GAGTAVQMR	2	906.445	89.0801	577	Met_OX(1)	NA	NA	1	0	0	0	240	43.8021	89.0801	1202	42.9947	46.0855	0.0267921	27	4026
30	19	0.934307,0.032847,0.032847,	NA	NA	y2,y3,y3-NH3,y4,y5,y6,y6-H2O,y7,b8,y7,b9,y8,y8-NH3,b9,b9-H2O,b9-NH3,b10,y9,b11,y10,y10-NH3,b12,y11,y11-NH3,b13,b13-H2O,b13-NH3,b14,b14-H2O,b14-NH3,y13,b15,b15-H2O,b15-NH3,	262.150981,375.235041,358.208492,522.303451,635.387511,692.408971,674.398406,821.451561,828.349839,843.433504,921.394836,936.478501,919.451952,943.376779,925.366215,926.350230,1072.419369,1073.487384,1129.440829,1130.508844,1113.482295,1242.524889,1258.603804,1241.577255,1389.593299,1371.582735,1372.566750,1502.677359,1484.666795,1485.650810,1518.719894,1589.709389,1571.698825,1572.682840,	4994	0	35.76	GSTPYKGDDEGIFISR	2	1763.82	117.388	577	Sodium adduct(1)	NA	NA	1	1	0	0	899	49.5376	117.388	9988	40.5023	76.8855	4.33497622683682e-09	0	1560
30	19	0.498357,0.498357,0.003285,0.000000,	NA	NA	y2,y3,y4,y4-H2O,y5,y5-NH3,b7,y6,y7,y7-NH3,b8,b8*,y8,b9,y9,y10,y10-H2O,b10,b10*,y9,y9-NH3,y11,y11-H2O,b12,y12,y12-NH3,b13,y13,b14,b14-H2O,b15,	262.150981,375.235041,522.303451,504.292886,635.387511,618.360962,691.340956,692.408971,821.451561,804.425012,886.334227,788.338957,936.478501,1001.361167,1051.505441,1108.526901,1090.516336,1130.403757,1032.408487,1131.471772,1114.445223,1236.621861,1218.611296,1300.509277,1399.685191,1382.658642,1447.577687,1496.737951,1560.661747,1542.651183,1647.693777,	5875	0	38.92	GSTPYKGDDEGIFISR	2	1821.8	117.388	577	Phosphorylation(1)	NA	NA	1	1	0	0	664	48.2217	117.388	11750	39.3241	78.0636	4.33497622683682e-09	0	1561
30	21	1.000000,	NA	NA	y3,y3-NH3,b4,b4*,y4,y4-H2O,y5,y5-H2O,b5,b5*,y6,b7,b7*,y7,y8,b9,y9,y10,b10,b10-H2O,b10-NH3,b10*,y11,b11,b11*,b12,b12-NH3,b12*,y12,y12-H2O,y12-NH3,b13,b13-H2O,b13-NH3,b13*,y13,y13-H2O,y13-NH3,b15,b15*,y14,y14-H2O,y14-NH3,	343.208821,326.182272,471.163917,373.168647,472.251411,454.240846,585.335471,567.324906,586.190857,488.195587,698.419531,785.286547,687.291277,811.503591,925.546521,1013.372407,1039.589451,1110.626561,1126.456467,1108.445903,1109.429918,1028.461197,1238.685141,1239.540527,1141.545257,1352.624587,1335.598038,1254.629317,1353.712081,1335.701516,1336.685532,1481.667177,1463.656613,1464.640628,1383.6…	8879	0	49.7	GVSFDQANNLLIEPAR	2	1823.86	142.362	577	Phosphorylation(1)	NA	NA	1	0	0	0	1057	50.2407	142.362	17758	56.0143	86.3478	6.36741909058792e-18	0	554
55	34	NA	NA	NA	y3,y4,b5,b5-H2O,y5,y5-H2O,y5-NH3,b6,b6-H2O,b6-NH3,y6,y6-H2O,y6-NH3,y7,b9,y8,b10,b10-NH3,y9,y9-H2O,b11,b11-NH3,y10,b12,b12-NH3,y11,b13,b13-NH3,y12,y13,b18,y12(2+),y13(2+),y15(2+),y16(2+),b18(2+),y17(2+),y18(2+),y19(2+),y20(2+),b22(2+),y21(2+),y22(2+),y23(2+),y24(2+),y26(2+),	401.287071,502.334751,506.224526,488.213962,615.418811,597.408246,598.392262,634.283106,616.272542,617.256557,716.466491,698.455926,699.439942,829.550551,933.406076,958.593141,1046.490136,1029.463587,1087.635731,1069.625166,1159.574196,1142.547647,1216.678321,1272.658256,1255.631707,1345.720911,1401.700846,1384.674297,1458.804971,1614.906081,1968.018476,1458.804971,1614.906081,1782.995951,1912.03…	13363	0	70.6	GVSFDQANNLLIEPARIEEEELTLTILR	3	3183.7	200.059	577	NA	NA	NA	0	1	0	0	960	49.8227	200.059	26726	51.5689	148.49	7.4495938537707e-22	0	365
34	27	NA	NA	NA	y3,b4,y4,b5,y5,y5-H2O,b6,b6-H2O,y6,y6-H2O,b7,b7-NH3,y7,b8,b8-NH3,y8,b9,y9,b10,b10-NH3,y10,b11,b11-H2O,b11-NH3,y11,b12,b12-NH3,y12,b13,b13-H2O,b13-NH3,y13,y13-H2O,b14,y14,b15,y15,y16,y16-NH3,b17,	361.219391,437.239446,476.246331,536.307856,589.330391,571.319826,607.344966,589.334402,718.372981,700.362416,721.387896,704.361347,817.441391,868.456306,851.429757,930.525451,999.496796,1058.584031,1127.555376,1110.528827,1189.624521,1240.639436,1222.628872,1223.612887,1336.692931,1339.707846,1322.681297,1450.735861,1468.750436,1450.739872,1451.723887,1521.772971,1503.762406,1581.834496,1620.841…	13638	0	72.04	LPPEVANFMQLVELDVSR	2	2057.08	205.774	577	NA	NA	NA	0	0	0	0	1217	50.8529	205.774	27276	31.9523	173.821	2.02400320543841e-21	0	385
34	27	NA	NA	NA	y3,b4,y4,b5,y5,b6,b6-H2O,y6,y6-H2O,y6-NH3,b7,b7-NH3,y7,b8,b8-NH3,y8,b9,y9,y9-NH3,b10,b10-NH3,y10,y10-H2O,b11,b11-NH3,y11,b12,b12-NH3,y12,y12-H2O,b13,b13-H2O,b13-NH3,y13,b14,y14,b15,b15-NH3,y15,b16,b16-H2O,y16,y16-H2O,y16-NH3,	361.219391,437.239446,476.246331,536.307856,589.330391,607.344966,589.334402,718.372981,700.362416,701.346432,721.387896,704.361347,817.441391,868.456306,851.429757,930.525451,999.496796,1058.584031,1041.557482,1127.555376,1110.528827,1189.624521,1171.613956,1240.639436,1223.612887,1336.692931,1339.707846,1322.681297,1450.735861,1432.725296,1468.750436,1450.739872,1451.723887,1521.772971,1581.834…	13759	0	72.72	LPPEVANFMQLVELDVSR	2	2057.08	205.774	577	NA	NA	NA	0	0	0	0	1156	50.6296	205.774	27518	44.8204	160.953	2.02400320543841e-21	0	386
34	27	NA	NA	NA	y3,y3-NH3,b4,y4,y4-NH3,b5,y5,b6,b6-H2O,y6,y6-NH3,b7,b7-NH3,y7,b8,b8-NH3,y8,b9,y9,y9-H2O,y9-NH3,b10,b10-NH3,y10,y10-H2O,b11,y11,b12,b12-NH3,y12,b13,b13-H2O,b13-NH3,y13,y13-NH3,b14,b14-NH3,y14,b15,y15,y16,y16-H2O,y16-NH3,y17,	361.219391,344.192842,437.239446,476.246331,459.219782,536.307856,589.330391,607.344966,589.334402,718.372981,701.346432,721.387896,704.361347,817.441391,868.456306,851.429757,930.525451,999.496796,1058.584031,1040.573466,1041.557482,1127.555376,1110.528827,1189.624521,1171.613956,1240.639436,1336.692931,1339.707846,1322.681297,1450.735861,1468.750436,1450.739872,1451.723887,1521.772971,1504.7464…	13815	0	73.07	LPPEVANFMQLVELDVSR	2	2057.08	205.774	577	NA	NA	NA	0	0	0	0	1269	51.0346	205.774	27630	40.5023	165.271	2.02400320543841e-21	0	387
34	27	NA	NA	NA	y3,b4,b4-H2O,y4,b5,y5,b6,b6-H2O,y6,y6-H2O,b7,b7-NH3,y7,b8,b8-NH3,y8,b9,b9-NH3,y9,y9-NH3,b10,b10-NH3,y10,b11,b11-NH3,y11,y11-NH3,b12,b12-H2O,b12-NH3,y12,y12-NH3,b13,b13-H2O,b13-NH3,y13,y13-H2O,y13-NH3,b14,y14,b15,b15-NH3,y15,b16,b16-NH3,y16,y16-H2O,y16-NH3,	361.219391,437.239446,419.228882,476.246331,536.307856,589.330391,607.344966,589.334402,718.372981,700.362416,721.387896,704.361347,817.441391,868.456306,851.429757,930.525451,999.496796,982.470247,1058.584031,1041.557482,1127.555376,1110.528827,1189.624521,1240.639436,1223.612887,1336.692931,1319.666382,1339.707846,1321.697282,1322.681297,1450.735861,1433.709312,1468.750436,1450.739872,1451.7238…	13871	0	73.43	LPPEVANFMQLVELDVSR	2	2057.08	205.774	577	NA	NA	NA	0	0	0	0	1141	50.5729	205.774	27742	33.426	172.348	2.02400320543841e-21	0	388
46	30	NA	NA	NA	y3,y4,y4-NH3,b5,b5-H2O,y5,b6,y6,b7,b7-H2O,y7,y7-NH3,b8,y8,b9,y10,b11,y11,b12,y12,b13,b13-NH3,y13,b14,b15,y14,y15,b16,b16-H2O,y16,b17,b17-NH3,y17,b18,y18,b19,b19-NH3,y19,	345.224471,458.308531,441.281982,514.250746,496.240182,557.376941,611.303506,670.461001,698.335536,680.324972,741.498111,724.471562,795.388296,840.566521,852.409756,1026.630571,1077.521096,1141.657511,1206.563686,1270.700101,1335.606276,1318.579727,1399.742691,1450.633216,1507.654676,1527.801271,1624.854031,1636.697266,1618.686702,1681.875491,1735.765676,1718.739127,1778.928251,1806.802786,1865.9…	10385	0	55.71	SLEPSPSPGPQEEDGEVALVLLGR	2	2476.26	187.103	577	NA	NA	NA	0	0	0	0	1511	51.7926	187.103	20770	30.3486	156.755	2.70184106920159e-21	0	393
42	29	NA	NA	NA	y3,b4,y4,y4-NH3,y5,y5-NH3,b6,b6-NH3,y6,y6-H2O,b7,b7-H2O,y7,y7-H2O,y7-NH3,b8,b8-NH3,b9,b9-NH3,y8,y8-NH3,b10,y9,y10,y11,b13,b13-H2O,y12,y12-H2O,y12-NH3,b14,y13,y13-NH3,y14,y14-H2O,b15,y15,y15-NH3,b16,y16,y16-H2O,b17,b17-NH3,y17,y17-H2O,y17-NH3,b18,y18,y18-H2O,y18-NH3,b19,b19-NH3,	359.240121,455.286396,488.282711,471.256162,587.351121,570.324572,626.350786,609.324237,658.388231,640.377666,725.419196,707.408632,787.430821,769.420256,770.404272,796.456306,779.429757,909.540366,892.513817,924.489731,907.463182,1037.598946,1061.548641,1190.591231,1261.628341,1294.700106,1276.689542,1318.649801,1300.639236,1301.623252,1431.759016,1446.708381,1429.681832,1559.792441,1541.781876,…	6584	0	41.47	LLEVNGVALQGAEHHEAVEALR	2	2355.24	191.667	577	NA	NA	NA	0	0	0	0	1150	50.607	191.667	13168	37.5911	154.076	6.37034275674292e-21	0	405
32	23	0.999998,0.000002,	NA	NA	y1,b3,b3-H2O,y3,y3-NH3,y4,y4-H2O,b6,y6,y7,b8,b8-NH3,y8,y8-NH3,b9,b9,b10,b11,b12,b4(2+),y5(2+),y6(2+),b9(2+),b10(2+),b12(2+),y12(2+),b13(2+),y13(2+),b15(2+),y14(2+),	175.118951,244.129176,226.118612,343.208821,326.182272,472.251411,454.240846,634.283106,698.419531,811.503591,841.345089,824.318540,925.546521,908.519972,933.406076,955.388019,1068.472079,1181.556139,1294.640199,391.197586,585.335471,698.419531,955.388019,1068.472079,1294.640199,1375.694024,1423.682789,1522.762434,1591.772659,1609.794464,	8110	0	46.93	GVSFDQANNLLIEPAR	3	1765.88	159.455	577	Sodium adduct(1)	NA	NA	1	0	0	0	1179	50.7151	159.455	16220	102.465	56.9908	1.19229198746828e-12	0	1008
30	17	1.000000,0.000000,	NA	NA	y3,y3-NH3,y4,y4-H2O,y4-NH3,b5,b5-H2O,y5,y6,y6-H2O,y7,b8,y8,b9,b10,y10,b11,y11,y11-H2O,y11-NH3,b12,b13,b13-H2O,b13-NH3,b15,y14,y14-H2O,y14-NH3,	343.208821,326.182272,472.251411,454.240846,455.224862,528.206469,510.195905,585.335471,698.419531,680.408966,811.503591,841.345089,925.546521,955.388019,1068.472079,1110.626561,1181.556139,1238.685141,1220.674576,1221.658592,1294.640199,1423.682789,1405.672225,1406.656240,1591.772659,1609.794464,1591.783899,1592.767915,	8090	0	46.86	GVSFDQANNLLIEPAR	2	1765.88	94.8061	577	Sodium adduct(1)	NA	NA	1	0	0	0	1154	50.6221	94.8061	16180	36.2107	58.5954	0.000161738	6	2918
33	29	NA	NA	NA	y1,y1-NH3,b2,y2,b3,y3,b4,y4,y5,b6,y6,y7,y7-NH3,b7,b8,b8-H2O,y8,y8-NH3,b9,b9-H2O,y9,y9-H2O,b10,b10-NH3,y10,y10-NH3,b11,y4(2+),y5(2+),y6(2+),y7(2+),b8(2+),y8(2+),y10(2+),b11(2+),y11(2+),y12(2+),	175.118951,158.092402,185.128446,262.150981,314.171036,375.235041,427.255096,472.287801,586.330731,613.319146,643.352191,730.384221,713.357672,760.387556,847.419586,829.409022,877.452631,860.426082,904.441046,886.430482,992.479571,974.469006,1018.483976,1001.457427,1063.516681,1046.490132,1115.536736,472.287801,586.330731,643.352191,730.384221,847.419586,877.452631,1063.516681,1115.536736,1176.60…	8650	0	48.86	ALEIADFSGNPLSR	3	1489.76	245.646	577	NA	NA	NA	0	0	0	0	881	49.4498	245.646	17300	65.3126	180.334	1.65677546783495e-20	0	429
54	33	NA	NA	NA	y3,y4,b5,b5-H2O,y5,b6,b6-H2O,b7,b7-H2O,y6,y6-H2O,y7,b9,y8,b10,b10-NH3,y9,y9-H2O,b11,b11-NH3,y10,b12,b12-NH3,y11,b13,y12,b15,b17,b9(2+),y13(2+),y14(2+),y15(2+),y16(2+),y17(2+),y18(2+),y20(2+),y21(2+),y22(2+),y23(2+),y24(2+),y26(2+),	401.287071,502.334751,506.224526,488.213962,615.418811,634.283106,616.272542,705.320216,687.309652,716.466491,698.455926,829.550551,933.406076,958.593141,1046.490136,1029.463587,1087.635731,1069.625166,1159.574196,1142.547647,1216.678321,1272.658256,1255.631707,1345.720911,1401.700846,1458.804971,1569.790716,1838.975886,933.406076,1614.906081,1685.943191,1782.995951,1912.038541,2025.122601,2138.2…	13184	0	69.54	GVSFDQANNLLIEPARIEEEELTLTILR	3	3183.7	192.139	577	NA	NA	NA	0	1	0	0	948	49.7681	192.139	26368	43.613	148.526	7.1866201705861e-20	0	451
54	33	NA	NA	NA	y4,b5,b5-H2O,y5,b6,b6-H2O,b7,b7-H2O,y6,y7,y8,y9,y9-H2O,y9-NH3,b11,b11-NH3,y10,b12,b12-NH3,y11,b13,y12,b15,b15-NH3,y15,y13(2+),y15(2+),y16(2+),y17(2+),y18(2+),b21(2+),y20(2+),b22(2+),y21(2+),y22(2+),y23(2+),b24(2+),y24(2+),y25(2+),b27(2+),y26(2+),	502.334751,506.224526,488.213962,615.418811,634.283106,616.272542,705.320216,687.309652,716.466491,829.550551,958.593141,1087.635731,1069.625166,1070.609182,1159.574196,1142.547647,1216.678321,1272.658256,1255.631707,1345.720911,1401.700846,1458.804971,1569.790716,1552.764167,1782.995951,1614.906081,1782.995951,1912.038541,2025.122601,2138.206661,2355.146246,2365.333651,2468.230306,2479.376581,25…	14227	0	75.5	GVSFDQANNLLIEPARIEEEELTLTILR	3	3183.7	192.139	577	NA	NA	NA	0	1	0	0	949	49.7727	192.139	28454	42.4948	149.644	7.1866201705861e-20	0	452
54	33	NA	NA	NA	b4,b4-H2O,y3,y4,y5,b6,b6-H2O,b6-NH3,b7,b7-NH3,y6,y7,y8,y9,y9-H2O,y9-NH3,b11,b11-NH3,y10,b12,b12-NH3,y11,b13,b13-H2O,b13-NH3,y12,y13,y15,y13(2+),y15(2+),y16(2+),b18(2+),y17(2+),y18(2+),y19(2+),y20(2+),y21(2+),y22(2+),y23(2+),y24(2+),y25(2+),b27(2+),y26(2+),	391.197586,373.187022,401.287071,502.334751,615.418811,634.283106,616.272542,617.256557,705.320216,688.293667,716.466491,829.550551,958.593141,1087.635731,1069.625166,1070.609182,1159.574196,1142.547647,1216.678321,1272.658256,1255.631707,1345.720911,1401.700846,1383.690282,1384.674297,1458.804971,1614.906081,1782.995951,1614.906081,1782.995951,1912.038541,1968.018476,2025.122601,2138.206661,2251…	14284	0	75.85	GVSFDQANNLLIEPARIEEEELTLTILR	3	3183.7	192.139	577	NA	NA	NA	0	1	0	0	949	49.7727	192.139	28568	46.0683	146.071	7.1866201705861e-20	0	453
54	29	1.000000,0.000000,0.000000,	NA	NA	y3,y4,b5,b5*,y5,y5-NH3,y6,b7,b7-H2O,b7-NH3,b7*,y7,y8,b9,b9,b10,b10*,b10,b10*,y10,b11,b11*,y11,b12,b12-H2O,b12*,y12,b13,b13-NH3,b13*,b15,b15-H2O,b15*,y11(2+),b15(2+),y15(2+),y16(2+),y17(2+),y18(2+),y19(2+),y20(2+),y22(2+),y23(2+),y24(2+),y25(2+),	401.287071,502.334751,586.190857,488.195587,615.418811,598.392262,716.466491,785.286547,767.275983,768.259998,687.291277,829.550551,958.593141,1013.372407,1013.372407,1126.456467,1028.461197,1126.456467,1028.461197,1216.678321,1239.540527,1141.545257,1345.720911,1352.624587,1334.614023,1254.629317,1458.804971,1481.667177,1464.640628,1383.671907,1649.757047,1631.746483,1551.761777,1425.687242,1569…	13648	0	72.1	GVSFDQANNLLIEPARIEEEELTLTILR	3	3263.67	148.759	577	Phosphorylation(1)	NA	NA	1	1	0	0	1472	51.6791	148.759	27296	44.5709	104.188	2.40341505366081e-12	0	1049
56	28	0.988596,0.006517,0.001222,0.001222,0.001222,0.001222,	NA	NA	b3,y2,y2-NH3,b4,b4-H2O,y3,y4,y4-NH3,y5,b6,b6-H2O,b6,y6,y7,b9,b10,b11,b11,b13,b13,y5(2+),b9(2+),b10(2+),b11(2+),b12(2+),b13(2+),b14(2+),y15(2+),y16(2+),y17(2+),b19(2+),y18(2+),b20(2+),b21(2+),b22(2+),b23(2+),b26(2+),	244.129176,288.203011,271.176462,391.197586,373.187022,401.287071,502.334751,485.308202,615.418811,634.283106,616.272542,656.265049,716.466491,829.550551,933.406076,1068.472079,1159.574196,1181.556139,1401.700846,1423.682789,615.418811,955.388019,1068.472079,1181.556139,1294.640199,1423.682789,1498.753606,1782.995951,1912.038541,2025.122601,2119.043009,2138.206661,2248.085599,2377.128189,2490.212…	12959	0	68.14	GVSFDQANNLLIEPARIEEEELTLTILR	4	3205.68	133.488	577	Sodium adduct(1)	NA	NA	1	1	0	0	1206	50.8135	133.488	25918	66.6192	66.8683	7.30410664517736e-09	0	1616
61	38	NA	NA	NA	y3,b5,b6,y4,y4-NH3,b7,b8,b8-H2O,y7,y7-NH3,b9,b9-H2O,b10,b10-H2O,y8,y8-H2O,y11,y11-NH3,b15,y13,y13-H2O,b16,y15,y15-NH3,b18,b18-H2O,y16,y17,y17-H2O,y17-NH3,y5(2+),y13(2+),b18(2+),y16(2+),y17(2+),b20(2+),y20(2+),b23(2+),y21(2+),y22(2+),b24(2+),y23(2+),b26(2+),y24(2+),b27(2+),y25(2+),y26(2+),b28(2+),y27(2+),b29(2+),	347.228891,396.224126,453.245586,494.297301,477.270752,566.329646,653.361676,635.351112,747.439931,730.413382,766.445736,748.435172,865.514146,847.503582,876.482521,858.471956,1160.630971,1143.604422,1318.674946,1404.752141,1386.741576,1405.706976,1628.843081,1611.816532,1629.797916,1611.787352,1715.875111,1852.934021,1834.923456,1835.907472,593.365711,1404.752141,1629.797916,1715.875111,1852.934…	8946	0	49.95	AGGPLGLSIVGGSDHSSHPFGVQEPGVFISK	3	3033.55	224.486	577	NA	NA	NA	0	0	0	0	1402	51.4675	224.486	17892	46.0683	178.418	2.17124631132883e-19	0	471
56	28	0.986936,0.006506,0.006506,0.000043,0.000008,0.000002,	NA	NA	y3,y3-NH3,y4,y4-NH3,b5,y5,b6,b6-NH3,y6,y6-H2O,y7,b9,b9-H2O,y8,y9,b11,y10,y10-H2O,y10-NH3,y11,b13,b13-NH3,y12,y13,y13-H2O,y13-NH3,b18,y5(2+),b8(2+),b13(2+),b16(2+),y15(2+),y16(2+),b21(2+),b22(2+),y22(2+),y23(2+),b25(2+),b26(2+),b27(2+),	401.287071,384.260522,502.334751,485.308202,528.206469,615.418811,656.265049,639.238500,716.466491,698.455926,829.550551,955.388019,937.377455,958.593141,1087.635731,1181.556139,1216.678321,1198.667756,1199.651772,1345.720911,1423.682789,1406.656240,1458.804971,1636.888024,1618.877459,1619.861475,1968.018476,615.418811,841.345089,1423.682789,1747.873769,1782.995951,1912.038541,2377.128189,2490.21…	12975	0	68.22	GVSFDQANNLLIEPARIEEEELTLTILR	3	3205.67	133.488	577	Sodium adduct(1)	NA	NA	1	1	0	0	1289	51.1025	133.488	25950	49.0965	84.391	7.30410664517736e-09	0	1617
56	28	0.959664,0.033738,0.006326,0.000222,0.000042,0.000008,	NA	NA	y4,y4-NH3,b5,y5,y5-NH3,b6,y6,y6-H2O,y7,b9,y8,y9,b11,y10,y10-H2O,y10-NH3,b12,y11,b13,y12,y13,b16,y5(2+),y10(2+),b13(2+),y12(2+),b16(2+),y15(2+),y16(2+),b18(2+),b19(2+),b20(2+),b21(2+),y23(2+),b25(2+),b26(2+),b27(2+),y26(2+),	502.334751,485.308202,528.206469,615.418811,598.392262,656.265049,716.466491,698.455926,829.550551,955.388019,958.593141,1087.635731,1181.556139,1216.678321,1198.667756,1199.651772,1294.640199,1345.720911,1423.682789,1458.804971,1636.888024,1725.891826,615.418811,1238.660264,1423.682789,1480.786914,1747.873769,1782.995951,1912.038541,1990.000419,2097.061066,2248.085599,2377.128189,2678.472271,280…	13030	0	68.58	GVSFDQANNLLIEPARIEEEELTLTILR	3	3205.68	133.488	577	Sodium adduct(1)	NA	NA	1	1	0	0	1181	50.7225	133.488	26060	55.5782	77.9093	7.30410664517736e-09	0	1618
45	33	NA	NA	NA	y1,b2,y2,b3,y3,b4,y4,b5,y5,b6,b7,b8,b8-H2O,b8-NH3,y9,b9,b9-H2O,b9-NH3,b10,b11,b11-NH3,y4(2+),y5(2+),b6(2+),b7(2+),b8(2+),y10(2+),b10(2+),b11(2+),y12(2+),y13(2+),y14(2+),y15(2+),b16(2+),y16(2+),b17(2+),b18(2+),b19(2+),	175.118951,227.175396,288.203011,356.217986,401.287071,455.286396,529.345651,569.329326,628.414061,697.387906,825.446486,912.478516,894.467952,895.451967,1022.574131,1025.562576,1007.552012,1008.536027,1138.646636,1195.668096,1178.641547,529.345651,628.414061,697.387906,825.446486,912.478516,1123.621811,1138.646636,1195.668096,1293.727331,1406.811391,1519.895451,1606.927481,1732.922796,1734.98606…	10749	0	57.44	LLEVNQQSLLGLTHGEAVQLLR	4	2431.37	230.73	577	NA	NA	NA	0	0	0	0	615	47.8888	230.73	21498	40.5331	190.197	4.88400311112345e-19	0	487
38	28	NA	NA	NA	b2,y2,y2-H2O,y2-NH3,b3,b4,y3,b5,b5-NH3,y4,y6,y7,y8,y10,b11,y11,y11-NH3,b13,b14,y14,y14-H2O,y14-NH3,b8(2+),y10(2+),b11(2+),y11(2+),b13(2+),b14(2+),y13(2+),b15(2+),y15(2+),b16(2+),y16(2+),b17(2+),	195.087646,234.144831,216.134266,217.118282,266.124756,323.146216,347.228891,437.189146,420.162597,494.297301,664.402821,793.445411,908.472351,1106.572791,1118.497336,1221.599731,1204.573182,1304.561386,1417.645446,1588.796531,1570.785966,1571.769982,805.369956,1106.572791,1118.497336,1221.599731,1304.561386,1417.645446,1474.753601,1564.713856,1645.817991,1677.797916,1716.855101,1764.829946,	4060	0	32.51	GHAGNPRDPTDEGIFISK	3	1910.94	197.661	577	NA	NA	NA	0	1	0	0	1105	50.4336	197.661	8120	57.0324	140.628	1.71648232895227e-18	0	504
43	32	NA	NA	NA	b2,y2,y3,y3-H2O,y4,y4-H2O,b5,y5,y5-H2O,y6,b6,y7,y8,y9,b9,b9,b10,y11,y12,b12,b13,b5(2+),b11(2+),b12(2+),y13(2+),b13(2+),b14(2+),b15(2+),y16(2+),b16(2+),b17(2+),b18(2+),b19(2+),b20(2+),b21(2+),	252.109116,288.203011,375.235041,357.224476,488.319101,470.308536,565.272876,587.387511,569.376946,674.419541,678.356936,787.503601,858.540711,957.609121,1001.505046,1001.505046,1114.589106,1117.639771,1174.661231,1228.632026,1331.641216,565.272876,1171.610566,1228.632026,1287.745291,1331.641216,1430.709626,1501.746736,1610.893401,1614.830796,1701.862826,1800.931236,1914.015296,2001.047326,2114.1…	12342	0	64.97	NHLEALPPEIGGCVALSVLSLR	3	2288.25	227.272	577	NA	NA	NA	0	0	0	0	917	49.6237	227.272	24684	76.8501	150.422	2.27639295967815e-18	0	509
54	23	1.000000,0.000000,0.000000,	NA	NA	b4,b4-H2O,y3,y4,y4-H2O,y5,y6,y7,y8,b9,b9,y11,b12,b12*,y12,b13,b13*,y14,y15(2+),y16(2+),y17(2+),y18(2+),y20(2+),y21(2+),y22(2+),y23(2+),y24(2+),y25(2+),y26(2+),	391.197586,373.187022,401.287071,502.334751,484.324186,615.418811,716.466491,829.550551,958.593141,1013.372407,1013.372407,1345.720911,1352.624587,1254.629317,1458.804971,1481.667177,1383.671907,1765.909522,1782.995951,1912.038541,2025.122601,2138.206661,2365.333651,2479.376581,2550.413691,2678.472271,2793.499211,2940.567621,3107.565982,	13714	0	72.47	GVSFDQANNLLIEPARIEEEELTLTILR	3	3263.67	93.1623	577	Phosphorylation(1)	NA	NA	1	1	0	0	1411	51.4953	93.1623	27428	72.3268	20.8355	0.0158749	24	3852
55	23	0.998733,0.001234,0.000008,0.000008,0.000008,0.000008,	NA	NA	b3,y2,y2-NH3,y3,y4,y5,b6,b6-H2O,y6,y6-H2O,y7,b9,b10,b11,b12,y11,b13,b13,y12,y5(2+),b9(2+),b12(2+),b13(2+),b15(2+),y15(2+),y16(2+),y17(2+),y18(2+),y20(2+),b21(2+),	244.129176,288.203011,271.176462,401.287071,502.334751,615.418811,634.283106,616.272542,716.466491,698.455926,829.550551,933.406076,1068.472079,1181.556139,1294.640199,1345.720911,1401.700846,1423.682789,1458.804971,615.418811,955.388019,1294.640199,1423.682789,1569.790716,1782.995951,1912.038541,2025.122601,2138.206661,2365.333651,2377.128189,	13016	0	68.5	GVSFDQANNLLIEPARIEEEELTLTILR	4	3205.68	91.2447	577	Sodium adduct(1)	NA	NA	1	1	0	0	1164	50.6595	91.2447	26032	45.1835	46.0613	0.024852	27	4008
43	32	NA	NA	NA	b2,y2,y3,y4,y4-NH3,b5,y5,b6,y6,y7,b8,y8,y9,y9-H2O,y9-NH3,y10,y10-NH3,b11,y11,y11-H2O,y11-NH3,b12,y12,y12-H2O,y12-NH3,y13,y13-H2O,y13-NH3,b6(2+),y6(2+),b7(2+),b8(2+),b9(2+),y9(2+),b10(2+),b11(2+),b12(2+),b14(2+),b17(2+),b18(2+),b19(2+),b20(2+),	253.093126,304.161541,417.245601,530.329661,513.303112,560.257556,643.413721,647.289586,714.450831,827.534891,873.457706,928.582571,1025.635331,1007.624766,1008.608782,1112.667361,1095.640812,1116.579606,1183.704471,1165.693906,1166.677922,1203.611636,1254.741581,1236.731016,1237.715032,1355.789261,1337.778696,1338.762712,647.289586,714.450831,760.373646,873.457706,974.505386,1025.635331,1045.542…	11603	0	61.42	HDHAVSLLTAASPTIALLLER	3	2228.24	227.272	577	NA	NA	NA	0	0	0	0	736	48.6688	227.272	23206	56.2022	171.07	3.41943448917056e-18	0	526
35	29	NA	NA	NA	y1,b2,y2,y3,b5,b5-H2O,y4,b6,y5,y6,y6-H2O,b10,y9,b11,y10,y10-H2O,b12,y11,b4(2+),y3(2+),y5(2+),b9(2+),b11(2+),y10(2+),b12(2+),y11(2+),b13(2+),y12(2+),b14(2+),b15(2+),y15(2+),b16(2+),	175.118951,185.092066,262.150981,349.183011,410.203396,392.192832,452.192201,509.271806,565.276261,636.313371,618.302806,907.415556,979.451311,1006.483966,1076.504071,1058.493506,1077.521076,1133.525531,339.166286,349.183011,565.276261,792.388616,1006.483966,1076.504071,1077.521076,1133.525531,1190.605136,1232.593941,1293.614326,1380.646356,1457.705271,1467.678386,	5845	0	38.8	PSPGAVGPEDVALCSSR	3	1641.79	230.545	577	NA	NA	NA	0	0	0	0	1069	50.2898	230.545	11690	65.3126	165.232	4.23139050150783e-18	0	548
55	23	0.998404,0.001234,0.000231,0.000043,0.000043,0.000043,	NA	NA	b3,y2,y2-NH3,y3,y4,y5,b6,b6-H2O,b6,b6-NH3,y6,y7,b11,y10,b13,b13-NH3,y7(2+),b10(2+),b13(2+),b15(2+),y15(2+),y16(2+),y17(2+),y18(2+),b20(2+),y19(2+),b21(2+),b22(2+),b26(2+),	244.129176,288.203011,271.176462,401.287071,502.334751,615.418811,634.283106,616.272542,656.265049,639.238500,716.466491,829.550551,1181.556139,1216.678321,1423.682789,1406.656240,829.550551,1068.472079,1423.682789,1569.790716,1782.995951,1912.038541,2025.122601,2138.206661,2248.085599,2251.290721,2377.128189,2490.212249,2918.475729,	13113	0	69.06	GVSFDQANNLLIEPARIEEEELTLTILR	4	3205.67	91.2447	577	Sodium adduct(1)	NA	NA	1	1	0	0	1289	51.1025	91.2447	26226	46.7679	44.4768	0.024852	27	4009
46	40	0.000000,0.000008,0.993443,0.006549,	NA	NA	b2,y2,y2-NH3,y3,b4,y4,y4-NH3,b5,y5,y5-NH3,b6,y6,y6-NH3,b7,y7,b8,y8,b9,y9,b10,b10-H2O,b11,y10,y11,y11*,b12,b12-H2O,b12*,y12,y12*,y13,y13*,y14,y14*,y4(2+),y6(2+),b7(2+),b8(2+),b9(2+),y9(2+),b10(2+),b11(2+),y11(2+),y12(2+),y13(2+),b16(2+),b17(2+),b18(2+),b19(2+),y19(2+),b20(2+),	253.093126,304.161541,287.134992,417.245601,461.189146,530.329661,513.303112,560.257556,643.413721,626.387172,647.289586,714.450831,697.424282,760.373646,827.534891,873.457706,928.582571,974.505386,1025.635331,1045.542496,1027.531932,1116.579606,1192.633692,1263.670802,1165.675532,1283.577967,1265.567403,1185.582697,1334.707912,1236.712642,1435.755592,1337.760322,1548.839652,1450.844382,530.32966…	11518	0	61.01	HDHAVSLLTAASPTIALLLER	3	2308.21	332.959	577	Phosphorylation(1)	NA	NA	1	0	0	0	1283	51.0823	332.959	23036	85.6222	247.336	8.35647109497943e-99	0	6
43	36	0.999768,0.000232,0.000000,0.000000,	NA	NA	y2,y2-H2O,y2-NH3,b3,y3,y4,y4-NH3,y5,y6,y6-H2O,y6-NH3,b7,y7,b8,y8,b9,y9,y9-H2O,y9-NH3,y10,y10-H2O,b11,b11-H2O,y11,y11-H2O,y11-NH3,b12,b12-H2O,y12,y12-H2O,y12-NH3,b13,y13,y13-H2O,y13-NH3,y14,b6(2+),b7(2+),b8(2+),b8(2+),b9(2+),y9(2+),b10(2+),y10(2+),b11(2+),b12(2+),b12(2+),b14(2+),y14(2+),b15(2+),b16(2+),b17(2+),b18(2+),b19(2+),y19(2+),b20(2+),	304.161541,286.150976,287.134992,390.152036,417.245601,530.329661,513.303112,643.413721,714.450831,696.440266,697.424282,788.368561,827.534891,901.452621,928.582571,1002.500301,1025.635331,1007.624766,1008.608782,1112.667361,1094.656796,1144.574521,1126.563957,1183.704471,1165.693906,1166.677922,1231.606551,1213.595987,1254.741581,1236.731016,1237.715032,1300.664396,1355.789261,1337.778696,1338.7…	12273	0	64.61	HDHAVSLLTAASPTIALLLER	3	2256.24	288.029	577	Formylation(1)	NA	NA	1	0	0	0	864	49.3651	288.029	24546	61.5774	226.452	2.82732115791462e-69	0	17
38	30	NA	NA	NA	y2,y3,y3-H2O,b4,y4,b5,y5,b6,b6-H2O,y6,y6-H2O,b7,y7,y7-H2O,b8,b8-H2O,b8-NH3,y8,y8-NH3,b9,b9-NH3,y9,y9-H2O,b10,b10-H2O,b10-NH3,b11,b11-NH3,b12,b13,y6(2+),b7(2+),y7(2+),b9(2+),b10(2+),b11(2+),b12(2+),b13(2+),b14(2+),b16(2+),y16(2+),b17(2+),	262.150981,361.219391,343.208826,437.239446,476.246331,536.307856,589.330391,607.344966,589.334402,718.372981,700.362416,721.387896,817.441391,799.430826,868.456306,850.445742,851.429757,930.525451,913.498902,999.496796,982.470247,1058.584031,1040.573466,1127.555376,1109.544812,1110.528827,1240.639436,1223.612887,1339.707846,1468.750436,718.372981,721.387896,817.441391,999.496796,1127.555376,1240…	13693	0	72.36	LPPEVANFMQLVELDVSR	3	2057.08	226.641	577	NA	NA	NA	0	0	0	0	1218	50.8565	226.641	27386	86.2052	140.436	1.53124951327492e-17	0	579
38	30	NA	NA	NA	y2,y2-H2O,y2-NH3,y3,y3-H2O,b4,y4,b5,y5,b6,b6-H2O,b6,b6-H2O,y6,y6-H2O,b7,y7,b8,b8-H2O,y8,y8-H2O,b9,b9-NH3,y9,y9-NH3,b10,b10-H2O,b10-NH3,b11,b11-NH3,b12,b12-NH3,b13,b15,b7(2+),y7(2+),b8(2+),y8(2+),b10(2+),b11(2+),b12(2+),b13(2+),b15(2+),b16(2+),	262.150981,244.140416,245.124432,361.219391,343.208826,437.239446,476.246331,536.307856,589.330391,607.344966,589.334402,607.344966,589.334402,718.372981,700.362416,721.387896,817.441391,868.456306,850.445742,930.525451,912.514886,999.496796,982.470247,1058.584031,1041.557482,1127.555376,1109.544812,1110.528827,1240.639436,1223.612887,1339.707846,1322.681297,1468.750436,1696.861436,721.387896,817…	13758	0	72.72	LPPEVANFMQLVELDVSR	3	2057.08	226.641	577	NA	NA	NA	0	0	0	0	1136	50.5538	226.641	27516	62.9689	163.673	1.53124951327492e-17	0	580
44	28	NA	NA	NA	y4,y5,b5,y6,b6,b6-H2O,y7,y7-NH3,b7,b8,b8-H2O,b8-NH3,y9,y9-NH3,b9,b9-H2O,b9-NH3,y10,b10,b10-H2O,y11,y11-NH3,b11,b11-H2O,b11-NH3,y12,b12,b12-H2O,y13,b13,y14,y14-H2O,y14-NH3,b14,y15,y15-H2O,y15-NH3,b15,y16,y16-H2O,y16-NH3,b16,y17,b17,b17-H2O,y18,y18-H2O,b18,	418.229611,489.266721,527.318766,618.309311,674.387176,656.376612,747.351901,730.325352,787.471236,916.513826,898.503262,899.487277,933.415951,916.389402,987.550936,969.540372,970.524387,1062.458541,1084.603696,1066.593132,1177.485481,1160.458932,1197.687756,1179.677192,1180.661207,1234.506941,1254.709216,1236.698652,1347.591001,1369.736156,1444.643761,1426.633196,1427.617212,1498.778746,1515.680…	11652	0	61.67	VSVIQFLEAPIGDEDAEEAAAEK	2	2431.19	170.85	577	NA	NA	NA	0	0	0	0	1560	51.9312	170.85	23304	38.0998	132.75	2.88914732263875e-17	0	598
40	27	NA	NA	NA	b3,b3-H2O,b4,b4-H2O,y4,b5,b5-H2O,y5,b6,b6-H2O,y6,y6-NH3,b7,b7-H2O,y7,b8,b8-H2O,b9,b9-H2O,y9,b10,b10-H2O,y11,y11-H2O,y11-NH3,b12,b12-H2O,y12,y12-H2O,y12-NH3,y13,y13-H2O,y13-NH3,y14,y14-H2O,y14-NH3,b15,b15-H2O,y15,y15-NH3,b16,y16,y16-H2O,y16-NH3,y17,y17-H2O,y17-NH3,b18,y18,y18-NH3,b19,y19,	390.152036,372.141472,461.189146,443.178582,530.329661,560.257556,542.246992,643.413721,647.289586,629.279022,714.450831,697.424282,760.373646,742.363082,827.534891,873.457706,855.447142,974.505386,956.494822,1025.635331,1045.542496,1027.531932,1183.704471,1165.693906,1166.677922,1203.611636,1185.601072,1254.741581,1236.731016,1237.715032,1355.789261,1337.778696,1338.762712,1468.873321,1450.86275…	11330	0	60.11	HDHAVSLLTAASPTIALLLER	2	2228.24	174.916	577	NA	NA	NA	0	0	0	0	728	48.6213	174.916	22660	28.6466	146.269	7.86044762866028e-17	0	615
40	30	0.000000,0.017274,0.491363,0.491363,	NA	NA	b3,b3-H2O,y3,y3-H2O,y3-NH3,b4,y4,b5,b5-H2O,y5,b6,b6-H2O,y6,y6-NH3,b7,b7-H2O,b7,b7-H2O,y7,b8,b8-H2O,y8,b9,b9-H2O,y9,b10,b10-H2O,y9,y9-H2O,b11,y12,y12-H2O,y12-NH3,y11,y11*,y12,y12-NH3,y12*,y13,y13*,b14,y14,y14-H2O,y14*,b15,b15-H2O,y15,y15-H2O,y15*,b16,y16,y16-H2O,y16-NH3,y16*,b17,y17,y17-H2O,y17*,b18,b18-H2O,y18,y18-H2O,y18-NH3,y18*,	390.152036,372.141472,417.245601,399.235036,400.219052,461.189146,530.329661,560.257556,542.246992,643.413721,647.289586,629.279022,714.450831,697.424282,760.373646,742.363082,760.373646,742.363082,827.534891,873.457706,855.447142,928.582571,974.505386,956.494822,1025.635331,1045.542496,1027.531932,1105.601662,1087.591097,1116.579606,1254.741581,1236.731016,1237.715032,1263.670802,1165.675532,133…	11533	0	61.08	HDHAVSLLTAASPTIALLLER	2	2308.21	215.136	577	Phosphorylation(1)	NA	NA	1	0	0	0	1299	51.1361	215.136	23066	43.1683	171.967	2.8494843923209e-59	0	26
36	26	NA	NA	NA	y3,y4,y5,y5-H2O,y6,y6-NH3,b6,b6-H2O,b6-NH3,y7,b7,b7-H2O,b7-NH3,b8,b8-H2O,b8-NH3,y9,y10,b9,b9-H2O,b9-NH3,b10,b10-H2O,b10-NH3,y11,y11-H2O,y11-NH3,b11,y12,y12-H2O,y12-NH3,b12,b12-H2O,b12-NH3,y13,b13,b13-H2O,b13-NH3,y14,b14,b14-H2O,b14-NH3,b15,b15-H2O,b15-NH3,y16,b16,b16-H2O,b16-NH3,y17,b17,b17-H2O,b17-NH3,b18,b18-H2O,b18-NH3,	303.177521,374.214631,503.257221,485.246656,604.304901,587.278352,626.314406,608.303842,609.287857,675.342011,739.398466,721.387902,722.371917,876.457376,858.446812,859.430827,901.437361,958.458821,1062.536686,1044.526122,1045.510137,1119.558146,1101.547582,1102.531597,1144.538131,1126.527566,1127.511582,1216.610906,1281.597041,1263.586476,1264.570492,1345.653496,1327.642932,1328.626947,1394.6811…	6327	0	40.55	ELPGQTLHWGPEATEAAGR	2	2019.99	180.343	577	NA	NA	NA	0	0	0	0	1310	51.1727	180.343	12654	40.5023	139.84	1.03114767092071e-16	0	623
43	32	0.000007,0.000195,0.157863,0.841935,	NA	NA	y2,y2-NH3,b3,b3-H2O,y3,y4,y4-NH3,b5,y5,b6,y6,b7,b8,b8-H2O,y8,y9,y9,b10,y10,b11,y10,y11,y11-H2O,y12,y12-NH3,y13,y13-H2O,b14,b6(2+),y6(2+),b8(2+),y8(2+),b9(2+),y9(2+),b10(2+),b11(2+),b12(2+),b12(2+),b15(2+),b16(2+),b17(2+),b18(2+),b19(2+),b20(2+),	304.161541,287.134992,390.152036,372.141472,417.245601,530.329661,513.303112,560.257556,643.413721,647.289586,714.450831,760.373646,873.457706,855.447142,956.577486,1025.635331,1053.630246,1073.537411,1112.667361,1116.579606,1140.662276,1211.699386,1193.688821,1282.736496,1265.709947,1383.784176,1365.773611,1429.706991,647.289586,714.450831,873.457706,956.577486,974.505386,1025.635331,1045.542496…	12042	0	63.46	HDHAVSLLTAASPTIALLLER	3	2256.24	227.272	577	Formylation(1)	NA	NA	1	0	0	0	901	49.5472	227.272	24084	47.5611	179.711	1.20519641065882e-37	0	95
55	32	NA	NA	NA	y3,y4,y4-H2O,b5,b5-H2O,y5,b6,b6-H2O,b7,b7-NH3,y6,y7,y8,b10,b10-NH3,y9,y9-H2O,y9-NH3,b11,b11-H2O,b11-NH3,y10,b12,b12-NH3,y11,b13,b13-NH3,y12,y12-H2O,y12-NH3,y11(2+),y13(2+),y15(2+),y16(2+),b18(2+),y17(2+),y18(2+),y19(2+),y20(2+),y21(2+),y22(2+),y23(2+),y24(2+),y25(2+),y26(2+),	401.287071,502.334751,484.324186,506.224526,488.213962,615.418811,634.283106,616.272542,705.320216,688.293667,716.466491,829.550551,958.593141,1046.490136,1029.463587,1087.635731,1069.625166,1070.609182,1159.574196,1141.563632,1142.547647,1216.678321,1272.658256,1255.631707,1345.720911,1401.700846,1384.674297,1458.804971,1440.794406,1441.778422,1345.720911,1614.906081,1782.995951,1912.038541,1968…	13009	0	68.45	GVSFDQANNLLIEPARIEEEELTLTILR	3	3183.7	177.466	577	NA	NA	NA	0	1	0	0	930	49.6848	177.466	26018	47.9151	129.551	1.92914110884128e-16	0	648
27	25	NA	NA	NA	y1,b2,b3,y2,b4,y3,b5,y4,y5,b7,b7-H2O,y6,b8,y7,b9,y8,y8-H2O,y8-NH3,b10,y2(2+),y3(2+),y4(2+),y5(2+),y6(2+),y8(2+),y9(2+),y10(2+),y11(2+),	175.118951,185.128446,256.165556,303.177531,327.202666,402.245941,426.271076,489.277971,546.299431,610.355866,592.345302,617.336541,681.392976,704.368571,738.414436,801.421331,783.410766,784.394782,825.446466,303.177531,402.245941,489.277971,546.299431,617.336541,801.421331,900.489741,971.526851,1042.563961,	3818	0	31.65	ALAAVPSAGSVQR	3	1226.69	225.425	577	NA	NA	NA	0	0	0	0	419	46.2221	225.425	7636	40.2029	185.222	1.99839591348696e-16	0	651
41	27	0.999768,0.000232,	NA	NA	b2,b2-H2O,y2,b3,b3-H2O,y3,b4,b4-H2O,y4,y4-NH3,b5,y5,y6,y6,y6,y7,b8,y8,y9,y10,b11,y11,b12,b12,b12-H2O,y12,y13,y13,y13-NH3,b14,y14,b15,b15-H2O,b16,b6(2+),b9(2+),y9(2+),b10(2+),b11(2+),b12(2+),y13(2+),y15(2+),b16(2+),y16(2+),b17(2+),y17(2+),b18(2+),y18(2+),y19(2+),b20(2+),y20(2+),	253.093126,235.082562,304.161541,390.152036,372.141472,417.245601,461.189146,443.178582,530.329661,513.303112,560.257556,643.413721,714.450831,736.432774,736.432774,827.534891,895.439649,928.582571,1025.635331,1112.667361,1138.561549,1183.704471,1203.611636,1225.593579,1207.583015,1254.741581,1355.789261,1377.771204,1360.744655,1401.712076,1468.873321,1536.778079,1518.767515,1585.833246,647.28958…	11326	0	60.08	HDHAVSLLTAASPTIALLLER	3	2250.23	170.689	577	Sodium adduct(1)	NA	NA	1	0	0	0	914	49.6095	170.689	22652	47.3342	123.355	8.97372715738271e-17	0	621
37	29	NA	NA	NA	y2,y2-NH3,y3,y3-H2O,y4,y4-H2O,b5,y5,b6,b6-H2O,y6,b7,b7-H2O,y7,b8,b8-H2O,y8,b9,y9,b10,b10-H2O,b10-NH3,b11,b11-NH3,b12,b13,y6(2+),b7(2+),b9(2+),y9(2+),b10(2+),b11(2+),b12(2+),b13(2+),b14(2+),b15(2+),b16(2+),b17(2+),	262.150981,245.124432,361.219391,343.208826,476.246331,458.235766,536.307856,589.330391,607.344966,589.334402,718.372981,721.387896,703.377332,817.441391,868.456306,850.445742,930.525451,999.496796,1058.584031,1127.555376,1109.544812,1110.528827,1240.639436,1223.612887,1339.707846,1468.750436,718.372981,721.387896,999.496796,1058.584031,1127.555376,1240.639436,1339.707846,1468.750436,1581.834496,…	13635	0	72.03	LPPEVANFMQLVELDVSR	3	2057.08	217.664	577	NA	NA	NA	0	0	0	0	1267	51.0278	217.664	27270	65.404	152.26	6.74561467015081e-16	0	688
42	27	NA	NA	NA	b3,y3,b4,y4,y4-NH3,y5,y6,y8,y8-H2O,y8-NH3,b8,b8-H2O,b8-NH3,y9,b9,b9-NH3,y10,b11,y11,y11-NH3,y12,y12-NH3,b12,b12-H2O,y13,y13-H2O,y13-NH3,b13,b13-H2O,b13-NH3,y14,y14-H2O,b14,b14-H2O,b14-NH3,b15,y15,y15-NH3,b16,b16-NH3,y16,y16-NH3,b17,y17,y17-NH3,b18,y18,y18-NH3,	356.217986,401.287071,455.286396,529.345651,512.319102,628.414061,699.451171,885.515221,867.504656,868.488672,912.478516,894.467952,895.451967,1022.574131,1025.562576,1008.536027,1123.621811,1195.668096,1236.705871,1219.679322,1293.727331,1276.700782,1308.752156,1290.741592,1406.811391,1388.800826,1389.784842,1409.799836,1391.789272,1392.773287,1519.895451,1501.884886,1546.858746,1528.848182,1529…	10639	0	56.87	LLEVNQQSLLGLTHGEAVQLLR	2	2431.37	166.657	577	NA	NA	NA	0	0	0	0	615	47.8888	166.657	21278	24.6892	141.968	7.62154466043939e-16	0	692
42	27	NA	NA	NA	b3,y3,b4,b4-H2O,y4,y4-NH3,b5,y5,b6,y6,y7,y8,y8-NH3,y9,b9,b9-H2O,b9-NH3,y10,y11,y12,y12-NH3,b12,y13,y13-H2O,y13-NH3,b13,b13-H2O,b13-NH3,y14,b14,b14-H2O,b14-NH3,y15,y15-NH3,b16,b16-H2O,b16-NH3,y16,y16-H2O,y16-NH3,b17,y17,b18,y18,y18-NH3,	356.217986,401.287071,455.286396,437.275832,529.345651,512.319102,569.329326,628.414061,697.387906,699.451171,828.493761,885.515221,868.488672,1022.574131,1025.562576,1007.552012,1008.536027,1123.621811,1236.705871,1293.727331,1276.700782,1308.752156,1406.811391,1388.800826,1389.784842,1409.799836,1391.789272,1392.773287,1519.895451,1546.858746,1528.848182,1529.832197,1606.927481,1589.900932,1732…	10711	0	57.23	LLEVNQQSLLGLTHGEAVQLLR	2	2431.37	166.657	577	NA	NA	NA	0	0	0	0	618	47.9099	166.657	21422	30.3486	136.308	7.62154466043939e-16	0	693
41	28	NA	NA	NA	b2,b3,b3-H2O,b3-NH3,y4,b4,b4-H2O,b4-NH3,b5,b5-NH3,y6,y7,y8,y8-H2O,y9,y11,b11,b11-H2O,b12,b12-NH3,b13,b13-H2O,y6(2+),y7(2+),y10(2+),y11(2+),y12(2+),b12(2+),y13(2+),b13(2+),y14(2+),b14(2+),y15(2+),y16(2+),y17(2+),y18(2+),y19(2+),	202.082236,315.166296,297.155732,298.139747,358.208481,444.208886,426.198322,427.182337,531.240916,514.214367,584.303831,671.335861,784.419921,766.409356,913.462511,1184.590561,1202.601146,1184.590582,1331.643736,1314.617187,1444.727796,1426.717232,584.303831,671.335861,1069.563621,1184.590561,1297.674621,1331.643736,1384.706651,1444.727796,1471.738681,1531.759826,1584.822741,1671.854771,1800.897…	7230	0	43.8	NSLESISSIDRELSPEGPGK	3	2115.06	183.268	577	NA	NA	NA	0	1	0	0	1375	51.383	183.268	14460	56.2022	127.066	9.87284797238102e-16	0	702
44	27	0.000042,0.001193,0.964845,0.033920,	NA	NA	b2,y2,b3,y3,y3-H2O,y4,y4-NH3,y5,y5-NH3,y6,y6-NH3,b7,y7,b8,y9,b11,y10,y11,y12,y13,b8(2+),b9(2+),y9(2+),b10(2+),b11(2+),y12(2+),y13(2+),b16(2+),b17(2+),b19(2+),b20(2+),	253.093126,304.161541,390.152036,417.245601,399.235036,530.329661,513.303112,643.413721,626.387172,714.450831,697.424282,760.373646,827.534891,873.457706,1025.635331,1116.579606,1192.633692,1263.670802,1334.707912,1435.755592,873.457706,974.505386,1025.635331,1045.542496,1116.579606,1334.707912,1435.755592,1665.799577,1778.883637,2005.051757,2134.094347,	11601	0	61.41	HDHAVSLLTAASPTIALLLER	3	2308.21	159.112	577	Phosphorylation(1)	NA	NA	1	0	0	0	1283	51.0823	159.112	23202	60.5475	98.5645	1.59634704769854e-13	0	895
60	29	NA	NA	NA	b5,y4,b6,b6-H2O,y5,b7,y6,b8,b8-NH3,y7,b9,y8,y9,b10,b10-NH3,b11,b11-H2O,b11-NH3,y10,b12,b12-H2O,b12-NH3,y11,y11-NH3,y12,b13,b13-NH3,y13,y13-H2O,y13-NH3,b14,b14-H2O,b14-NH3,y14,b15,b15-H2O,b15-NH3,y16,y16-H2O,y16-NH3,y17,y17-H2O,y17-NH3,b18,b18-NH3,y18,y18-NH3,b19,b20,y19,y19-H2O,y19-NH3,	522.303446,530.329661,593.340556,575.329992,631.377341,706.424616,730.445751,820.467546,803.440997,843.529811,935.494486,957.572741,1028.609851,1034.562896,1017.536347,1121.594926,1103.584362,1104.568377,1141.693911,1234.678986,1216.668422,1217.652437,1255.736841,1238.710292,1312.758301,1362.737566,1345.711017,1411.826711,1393.816146,1394.800162,1433.774676,1415.764112,1416.748127,1526.853651,154…	14024	0	74.22	SLAHLALNDVSLQALPGDVGNLANLVTLELR	2	3226.79	133.074	577	NA	NA	NA	0	0	0	0	533	47.2673	133.074	28048	13.0617	120.012	1.83333258616545e-15	0	719
34	25	NA	NA	NA	y3,y3-H2O,b4,b4-H2O,y4,y4-H2O,b5,y5,b6,b6-H2O,y6,y6-H2O,y7,b8,b8-NH3,y8,y9,y9-NH3,b10,b10-H2O,y10,b11,b11-NH3,y11,b12,b12-NH3,y12,b13,b13-H2O,b13-NH3,y13,b14,y14,b15,y15,y15-H2O,b16,y16,y16-NH3,	361.219391,343.208826,437.239446,419.228882,476.246331,458.235766,536.307856,589.330391,607.344966,589.334402,718.372981,700.362416,817.441391,868.456306,851.429757,930.525451,1058.584031,1041.557482,1127.555376,1109.544812,1189.624521,1240.639436,1223.612887,1336.692931,1339.707846,1322.681297,1450.735861,1468.750436,1450.739872,1451.723887,1521.772971,1581.834496,1620.841381,1696.861436,1749.88…	16188	0	95.61	LPPEVANFMQLVELDVSR	2	2057.08	176.751	577	NA	NA	NA	0	0	0	0	1141	50.5729	176.751	32376	37.5911	139.16	1.84725535017883e-15	0	722
43	25	0.058824,0.313725,0.313725,0.313725,	NA	NA	y1,y2,y3,y4,b5,y5,y6,y7,b8,y9,b4(2+),b5(2+),y5(2+),y6(2+),b7(2+),b8(2+),b10(2+),y9(2+),b11(2+),b11(2+),y13(2+),b14(2+),b15(2+),b16(2+),b17(2+),b18(2+),b19(2+),	175.118951,304.161541,417.245601,530.329661,560.257556,643.413721,714.450831,827.534891,873.457706,1025.635331,461.189146,560.257556,643.413721,714.450831,760.373646,873.457706,1045.542496,1105.601662,1116.579606,1196.545937,1435.755592,1481.678407,1594.762467,1665.799577,1778.883637,1891.967697,2005.051757,	11534	0	61.08	HDHAVSLLTAASPTIALLLER	4	2308.21	140.05	577	Phosphorylation(1)	NA	NA	1	0	0	0	1306	51.1594	140.05	23068	52.591	87.4588	6.30304769038523e-09	0	1608
35	26	NA	NA	NA	y1,y2,y2,y3,y3-H2O,y4,b6,y5,y5-NH3,y6,y6-NH3,b8,b9,y8,b10,b10-H2O,b11,y10,b12,b12-H2O,b12-NH3,y11,b13,y4(2+),y5(2+),y6(2+),b12(2+),y11(2+),b13(2+),b14(2+),y13(2+),y14(2+),	175.118951,262.150981,262.150981,375.235041,357.224476,522.303451,634.319496,635.387511,618.360962,692.408971,675.382422,806.367896,921.394836,936.478501,1050.437426,1032.426862,1107.458886,1108.526901,1220.542946,1202.532382,1203.516397,1236.621861,1367.611356,522.303451,635.387511,692.408971,1220.542946,1236.621861,1367.611356,1480.695416,1496.737951,1597.785631,	4985	0	35.74	GSTPYKGDDEGIFISR	3	1741.84	185.467	577	NA	NA	NA	0	1	0	0	1041	50.1745	185.467	9970	72.4922	112.975	3.05473089473052e-15	0	730
42	23	0.999992,0.000008,	NA	NA	b2,b2-H2O,y2,b3,b3-H2O,y3,b4,y4,y4-NH3,b5,y5,y6,y6,y7,b8,y8,b9,y9,y10,b11,y11,b12,b12,b12-H2O,y12,b6(2+),b8(2+),b9(2+),y9(2+),y10(2+),b11(2+),b12(2+),b16(2+),y16(2+),b17(2+),y17(2+),y18(2+),b19(2+),y19(2+),b20(2+),y20(2+),	253.093126,235.082562,304.161541,390.152036,372.141472,417.245601,461.189146,530.329661,513.303112,560.257556,643.413721,714.450831,736.432774,827.534891,895.439649,928.582571,974.505386,1025.635331,1112.667361,1138.561549,1183.704471,1203.611636,1225.593579,1207.583015,1254.741581,647.289586,873.457706,996.487329,1025.635331,1134.649304,1138.561549,1225.593579,1607.815189,1690.971354,1720.899249…	11393	0	60.44	HDHAVSLLTAASPTIALLLER	3	2250.22	121.797	577	Sodium adduct(1)	NA	NA	1	0	0	0	991	49.9607	121.797	22786	53.5167	68.28	2.09022328395513e-05	4	2612
44	27	NA	NA	NA	y3,b4,y4,y5,y5-NH3,y6,b7,y7,b8,y8,y9,y9-NH3,b10,y10,b11,b11-H2O,y11,y11-NH3,y12,y12-H2O,y12-NH3,b13,y13,b14,y14,y14-H2O,y14-NH3,b15,y15,b16,y16,y16-H2O,y16-NH3,b17,y17,b18,b18-H2O,y18,y18-H2O,y18-NH3,	346.183341,397.280916,417.220451,516.288861,499.262312,631.315801,720.429026,744.399861,833.513086,843.468271,980.527181,963.500632,1041.609106,1093.611241,1142.656786,1124.646222,1222.653831,1205.627282,1323.701511,1305.690946,1306.674962,1372.747056,1424.749191,1485.831116,1561.808101,1543.797536,1544.781552,1622.890026,1632.845211,1721.958436,1745.929271,1727.918706,1728.902722,1835.042496,187…	9231	0	51.06	LAVLPPELAHTTELHVLDVAGNR	2	2465.35	159.112	577	NA	NA	NA	0	0	0	0	854	49.3146	159.112	18462	28.3276	130.784	4.87466517793928e-15	0	742
44	27	NA	NA	NA	y4,y5,b5,b6,b6-H2O,b6-NH3,y7,b7,y8,y8-H2O,y8-NH3,b8,b8-H2O,b8-NH3,y9,y9-NH3,b9,b9-H2O,b9-NH3,y10,b10,y11,b11,b11-H2O,y12,b12,b12-H2O,y13,b13,y14,y14-H2O,y14-NH3,b14,y15,y15-H2O,y15-NH3,b15,y16,y16-H2O,y16-NH3,y17,y17-H2O,y17-NH3,b17,b17-NH3,y18,y18-NH3,b18,	418.229611,489.266721,527.318766,674.387176,656.376612,657.360627,747.351901,787.471236,818.389011,800.378446,801.362462,916.513826,898.503262,899.487277,933.415951,916.389402,987.550936,969.540372,970.524387,1062.458541,1084.603696,1177.485481,1197.687756,1179.677192,1234.506941,1254.709216,1236.698652,1347.591001,1369.736156,1444.643761,1426.633196,1427.617212,1498.778746,1515.680871,1497.67030…	11580	0	61.32	VSVIQFLEAPIGDEDAEEAAAEK	2	2431.19	159.112	577	NA	NA	NA	0	0	0	0	1547	51.8949	159.112	23160	44.8204	114.292	4.87466517793928e-15	0	743
30	26	NA	NA	NA	y1,b2,y2,y3,y3-NH3,b4,y4,b5,b5-H2O,y5,b6,b6-H2O,y6,y6-NH3,b7,b7,y7,y7-H2O,y7-NH3,b8,y8,b11,y4(2+),y5(2+),b6(2+),y6(2+),b7(2+),y7(2+),y8(2+),b9(2+),y10(2+),y11(2+),	175.118951,201.123366,288.203011,416.261591,399.235042,459.208546,530.304521,572.292606,554.282042,601.341631,685.376666,667.366102,716.368571,699.342022,798.460726,798.460726,829.452631,811.442066,812.426082,913.487666,942.536691,1226.626286,530.304521,601.341631,685.376666,716.368571,798.460726,829.452631,942.536691,984.524776,1184.663341,1313.705931,	11104	0	59.03	SLEELLLDANQLR	3	1513.82	217.38	577	NA	NA	NA	0	0	0	0	685	48.3569	217.38	22208	58.2859	159.094	5.41672674483144e-15	0	744
44	31	NA	NA	NA	b2,y2,y3,y3-H2O,y4,y4-NH3,b5,y5,y5-NH3,b6,y6,b7,y7,b8,y8,b9,y9,y9-H2O,b10,b10-H2O,y10,y10-H2O,y10-NH3,b11,y11,y11-H2O,y11-NH3,b12,b12-H2O,y12,y12-H2O,y12-NH3,b8(2+),b9(2+),y9(2+),b10(2+),b11(2+),b12(2+),y13(2+),b17(2+),b18(2+),b19(2+),b20(2+),	253.093126,304.161541,417.245601,399.235036,530.329661,513.303112,560.257556,643.413721,626.387172,647.289586,714.450831,760.373646,827.534891,873.457706,928.582571,974.505386,1025.635331,1007.624766,1045.542496,1027.531932,1112.667361,1094.656796,1095.640812,1116.579606,1183.704471,1165.693906,1166.677922,1203.611636,1185.601072,1254.741581,1236.731016,1237.715032,873.457706,974.505386,1025.6353…	11466	0	60.79	HDHAVSLLTAASPTIALLLER	3	2228.24	208.596	577	NA	NA	NA	0	0	0	0	702	48.4634	208.596	22932	55.2348	153.361	8.37940143809834e-15	0	770
44	31	NA	NA	NA	b2,y2,y2-NH3,y3,y4,y4-NH3,y5,y6,y7,b8,b9,y9,y9-H2O,y10,b11,y11,y11-H2O,b12,b12-H2O,y12,y12-H2O,y12-NH3,b13,y13,y13-H2O,y13-NH3,b7(2+),b8(2+),b9(2+),y9(2+),b10(2+),b11(2+),b12(2+),y13(2+),b14(2+),b16(2+),b17(2+),b18(2+),b19(2+),b20(2+),	253.093126,304.161541,287.134992,417.245601,530.329661,513.303112,643.413721,714.450831,827.534891,873.457706,974.505386,1025.635331,1007.624766,1112.667361,1116.579606,1183.704471,1165.693906,1203.611636,1185.601072,1254.741581,1236.731016,1237.715032,1300.664396,1355.789261,1337.778696,1338.762712,760.373646,873.457706,974.505386,1025.635331,1045.542496,1116.579606,1203.611636,1355.789261,1401.…	11680	0	61.77	HDHAVSLLTAASPTIALLLER	3	2228.24	208.596	577	NA	NA	NA	0	0	0	0	730	48.6332	208.596	23360	51.8724	156.724	8.37940143809834e-15	0	771
54	31	NA	NA	NA	y3,y4,b5,b5-H2O,y5,b7,b7-H2O,b7-NH3,y6,b8,y7,y8,y9,y9-H2O,y9-NH3,y10,y10-H2O,b12,b12-NH3,y11,b13,b13-H2O,y12,b15,b15-NH3,y15,y15-NH3,b8(2+),y13(2+),y15(2+),y16(2+),b18(2+),y17(2+),y19(2+),y20(2+),y21(2+),y22(2+),y23(2+),y24(2+),y25(2+),b27(2+),	401.287071,502.334751,506.224526,488.213962,615.418811,705.320216,687.309652,688.293667,716.466491,819.363146,829.550551,958.593141,1087.635731,1069.625166,1070.609182,1216.678321,1198.667756,1272.658256,1255.631707,1345.720911,1401.700846,1383.690282,1458.804971,1569.790716,1552.764167,1782.995951,1765.969402,819.363146,1614.906081,1782.995951,1912.038541,1968.018476,2025.122601,2251.290721,2365…	13068	0	68.8	GVSFDQANNLLIEPARIEEEELTLTILR	3	3183.7	169.807	577	NA	NA	NA	0	1	0	0	948	49.7681	169.807	26136	45.6537	124.153	8.86121008734606e-15	0	774
54	31	NA	NA	NA	y3,y3-NH3,y4,b5,y5,b6,b6-H2O,b7,b7-NH3,y6,y6-NH3,y7,b9,y8,y9,y9-H2O,b11,b11-H2O,b11-NH3,y10,b12,b12-H2O,b12-NH3,y11,b13,b13-H2O,b13-NH3,y12,b15,b15(2+),y14(2+),b16(2+),y15(2+),y16(2+),y17(2+),y18(2+),y21(2+),y22(2+),y23(2+),y24(2+),y25(2+),b27(2+),	401.287071,384.260522,502.334751,506.224526,615.418811,634.283106,616.272542,705.320216,688.293667,716.466491,699.439942,829.550551,933.406076,958.593141,1087.635731,1069.625166,1159.574196,1141.563632,1142.547647,1216.678321,1272.658256,1254.647692,1255.631707,1345.720911,1401.700846,1383.690282,1384.674297,1458.804971,1569.790716,1569.790716,1685.943191,1725.891826,1782.995951,1912.038541,2025.…	13632	0	72.02	GVSFDQANNLLIEPARIEEEELTLTILR	3	3183.7	169.807	577	NA	NA	NA	0	1	0	0	980	49.9123	169.807	27264	49.0965	120.711	8.86121008734606e-15	0	775
26	24	NA	NA	NA	y1,b2,b2-H2O,b3,y2,y2-NH3,y3,b5,y5,y5-H2O,y6,b6,b7,b8,b10,b10-NH3,b11,y10,b4(2+),y5(2+),y6(2+),y7(2+),b7(2+),b8(2+),b10(2+),b11(2+),y10(2+),y11(2+),	175.118951,187.071326,169.060762,288.119006,288.203011,271.176462,401.287071,553.236496,559.356211,541.345646,658.424621,682.279086,753.316196,852.384606,1010.453746,993.427197,1123.537806,1123.621811,425.177916,559.356211,658.424621,729.461731,753.316196,852.384606,1010.453746,1123.537806,1123.621811,1224.669491,	5451	0	37.39	DATHQEAVSALLR	3	1410.73	215.758	577	NA	NA	NA	0	0	0	0	689	48.3822	215.758	10902	75.9153	139.842	1.03510679686468e-14	0	780
40	26	NA	NA	NA	y3,b4,b4-H2O,y4,b5,b5-H2O,y5,y5-NH3,b6,b6-H2O,y6,b7,b7-H2O,b8,b8-H2O,b9,b9-H2O,y9,b10,b10-H2O,y11,y11-NH3,b12,b12-H2O,y12,y12-H2O,y13,y13-H2O,y13-NH3,y14,y14-H2O,y14-NH3,b15,b15-H2O,y15,y15-H2O,b16,b16-H2O,y16,y16-NH3,b17,y17,y17-H2O,y17-NH3,b18,y18,y18-H2O,y18-NH3,y19,y19-H2O,	417.245601,461.189146,443.178582,530.329661,560.257556,542.246992,643.413721,626.387172,647.289586,629.279022,714.450831,760.373646,742.363082,873.457706,855.447142,974.505386,956.494822,1025.635331,1045.542496,1027.531932,1183.704471,1166.677922,1203.611636,1185.601072,1254.741581,1236.731016,1355.789261,1337.778696,1338.762712,1468.873321,1450.862756,1451.846772,1514.796136,1496.785572,1581.957…	11406	0	60.5	HDHAVSLLTAASPTIALLLER	2	2228.24	162.494	577	NA	NA	NA	0	0	0	0	738	48.6806	162.494	22812	36.5141	125.98	1.71421122435772e-14	0	791
41	21	0.058824,0.313725,0.313725,0.313725,	NA	NA	y1,y2,y3,y3-H2O,y4,y5,y6,y7,b8,b9,y9,y9-NH3,y9,b11,y5(2+),b6(2+),b7(2+),b8(2+),y8(2+),b9(2+),b10(2+),y13(2+),b14(2+),b15(2+),b17(2+),b18(2+),	175.118951,304.161541,417.245601,399.235036,530.329661,643.413721,714.450831,827.534891,901.452621,974.505386,1025.635331,1008.608782,1053.630246,1116.579606,643.413721,647.289586,760.373646,873.457706,956.577486,974.505386,1073.537411,1383.784176,1429.706991,1542.791051,1726.912221,1839.996281,	12028	0	63.39	HDHAVSLLTAASPTIALLLER	4	2256.23	104.394	577	Formylation(1)	NA	NA	1	0	0	0	958	49.8137	104.394	24056	40.5331	63.8612	0.00743458	22	3713
22	16	0.027950,0.149068,0.795031,0.027950,	NA	NA	b2,y2,y2-NH3,b3,b3,y3,b4,b5,y6,y7,b7,b7-H2O,y8,y8-H2O,b8,b9,b9-H2O,y9,y9,y9-NH3,b10,b10-H2O,y10,y10,y10-NH3,b11,	243.133926,288.203011,271.176462,372.176516,394.158459,401.287071,523.201049,652.243639,716.466491,829.550551,866.375379,848.364815,958.593141,940.582576,979.459439,1080.507119,1062.496555,1087.635731,1109.617674,1092.591125,1193.591179,1175.580615,1216.678321,1238.660264,1221.633715,1306.675239,	9567	0	52.41	IEEEELTLTILR	2	1480.79	113.845	577	Sodium adduct(1)	NA	NA	1	0	0	0	759	48.8024	113.845	19134	38.3221	75.523	1.1926497042885e-07	1	1869
45	31	NA	NA	NA	y2,y2-H2O,y3,y4,y5,y5-H2O,y6,b6,b6-H2O,y7,b7,b8,b8-H2O,b8-NH3,y9,y9-NH3,b9,y10,y11,b11,b11-H2O,y12,y12-H2O,b13,b13-H2O,y14,y14-H2O,y15,y15-H2O,b15,y16,b16,y11(2+),y13(2+),y14(2+),y15(2+),y17(2+),y18(2+),b19(2+),y19(2+),b21(2+),b22(2+),	276.155391,258.144826,347.192501,418.229611,489.266721,471.256156,618.309311,674.387176,656.376612,747.351901,787.471236,916.513826,898.503262,899.487277,933.415951,916.389402,987.550936,1062.458541,1177.485481,1197.687756,1179.677192,1234.506941,1216.496376,1369.736156,1351.725592,1444.643761,1426.633196,1515.680871,1497.670306,1613.805686,1644.723461,1684.842796,1177.485481,1347.591001,1444.643…	11570	0	61.27	VSVIQFLEAPIGDEDAEEAAAEK	3	2431.19	203.967	577	NA	NA	NA	0	0	0	0	1507	51.7811	203.967	23140	51.8724	152.095	2.49027592552978e-14	0	812
18	14	1.000000,	NA	NA	y1,b2,y2,b3,y3,b4,b5,y6,b7,b7-NH3,y7,b8,y8,y8-NH3,b9,b9-H2O,y9,	175.118951,227.175396,274.187361,298.212506,389.214301,397.280916,511.323846,671.310722,679.377337,662.350788,770.379132,794.404277,841.416242,824.389693,893.472687,875.462123,954.500302,	4516	0	34.06	ILAVNGQDVR	2	1067.58	106.844	577	Pyro-glu from Q(1)	NA	NA	1	0	0	0	377	45.7634	106.844	9032	42.1236	64.72	1.37605270349605e-05	3	2532
32	24	NA	NA	NA	y2,y3,b5,b5-H2O,y4,b6,b6-H2O,y5,y5-NH3,b7,b7-H2O,y6,y7,b9,b9-H2O,y8,b10,b10-H2O,y9,b11,y10,y10-H2O,b12,y11,y11-NH3,b13,y12,y12-H2O,b14,y13,y13-H2O,y14,b15,b15-H2O,y15,	262.150981,349.183011,410.203396,392.192832,452.192201,509.271806,491.261242,565.276261,548.249712,566.293266,548.282702,636.313371,735.381781,792.388616,774.378052,850.408721,907.415556,889.404992,979.451311,1006.483966,1076.504071,1058.493506,1077.521076,1133.525531,1116.498982,1190.605136,1232.593941,1214.583376,1293.614326,1303.631051,1285.620486,1360.652511,1380.646356,1362.635792,1457.70527…	5871	0	38.91	PSPGAVGPEDVALCSSR	2	1641.79	173.285	577	NA	NA	NA	0	0	0	0	1055	50.2325	173.285	11742	27.7363	145.549	2.76646551512004e-14	0	817
26	22	NA	NA	NA	y2,y2-H2O,y2-NH3,b3,b3-H2O,y3,b4,y4,y4-H2O,y4-NH3,b5,y5,b6,b6-H2O,y6,y7,y7-H2O,b7,b8,b8-H2O,y8,y8-H2O,b9,b9-H2O,y9,y9-H2O,y9-NH3,b10,b10-H2O,b10-NH3,y10,y10-H2O,y10-NH3,b11,y11,y11-H2O,y11-NH3,b12,b12-H2O,b12-NH3,y12,y12-H2O,b13,b13-H2O,b13-NH3,	262.150981,244.140416,245.124432,314.171036,296.160472,375.235041,427.255096,472.287801,454.277236,455.261252,498.292206,586.330731,613.319146,595.308582,643.352191,730.384221,712.373656,760.387556,847.419586,829.409022,877.452631,859.442066,904.441046,886.430482,992.479571,974.469006,975.453022,1018.483976,1000.473412,1001.457427,1063.516681,1045.506116,1046.490132,1115.536736,1176.600741,1158.5…	8615	0	48.73	ALEIADFSGNPLSR	2	1489.77	180	577	NA	NA	NA	0	0	0	0	883	49.4596	180	17230	37.6081	142.392	5.19695279739822e-14	0	854
26	22	NA	NA	NA	y2,y2-H2O,b3,b3-H2O,y3,b4,y4,y4-H2O,b5,y5,y5-NH3,b6,b6-H2O,y6,y7,y7-H2O,b7,b8,b8-H2O,y8,y8-H2O,y8-NH3,b9,b9-H2O,y9,y9-H2O,b10,b10-NH3,y10,y10-H2O,y10-NH3,b11,y11,y11-NH3,b12,b12-NH3,y12,b13,b13-H2O,b13-NH3,	262.150981,244.140416,314.171036,296.160472,375.235041,427.255096,472.287801,454.277236,498.292206,586.330731,569.304182,613.319146,595.308582,643.352191,730.384221,712.373656,760.387556,847.419586,829.409022,877.452631,859.442066,860.426082,904.441046,886.430482,992.479571,974.469006,1018.483976,1001.457427,1063.516681,1045.506116,1046.490132,1115.536736,1176.600741,1159.574192,1228.620796,1211.…	8811	0	49.46	ALEIADFSGNPLSR	2	1489.77	180	577	NA	NA	NA	0	0	0	0	900	49.5424	180	17622	34.9314	145.068	5.19695279739822e-14	0	855
42	26	NA	NA	NA	y3,b4,b4-H2O,y4,y5,y5-NH3,y6,y7,y7-NH3,b8,y8,b10,y9,y10,y11,y11-H2O,b13,b13-H2O,y12,y12-H2O,y12-NH3,b14,b14-H2O,b14-NH3,y13,y13-H2O,y13-NH3,y14,y14-H2O,b15,y15,y15-NH3,b16,b16-NH3,b17,y17,y17-H2O,y17-NH3,b18,y18,y18-NH3,b19,b19-NH3,y19,y19-H2O,	359.240121,455.286396,437.275832,488.282711,587.351121,570.324572,658.388231,787.430821,770.404272,796.456306,924.489731,1037.598946,1061.548641,1190.591231,1261.628341,1243.617776,1294.700106,1276.689542,1318.649801,1300.639236,1301.623252,1431.759016,1413.748452,1414.732467,1446.708381,1428.697816,1429.681832,1559.792441,1541.781876,1568.817926,1630.829551,1613.803002,1697.860516,1680.833967,17…	6474	0	41.07	LLEVNGVALQGAEHHEAVEALR	2	2355.24	154.813	577	NA	NA	NA	0	0	0	0	1158	50.6371	154.813	12948	43.1683	111.645	1.09183245925882e-13	0	881
20	17	0.999768,0.000232,	NA	NA	b2,b1,b3,y2,y2-NH3,b2,b2-NH3,b3,y3,b4,y5,b6,b6-H2O,y6,y6-H2O,b7,y7,y7-NH3,b8,y8,y7,y9,y9-H2O,y9-NH3,b9,y10,y10-H2O,y9,y9-NH3,b10,	242.186296,243.145163,299.207756,303.177531,286.150982,356.229223,339.202674,413.250683,416.261591,526.334743,659.347111,728.393713,710.383149,774.374051,756.363486,842.436643,861.406081,844.379532,971.479233,974.490141,975.449008,1031.511601,1013.501036,1014.485052,1084.563293,1144.595661,1126.585096,1145.554528,1128.527979,1212.621873,	3485	0	30.44	KLGLSDNEIQR	2	1386.74	140.723	577	ubiquitinylation residue(1)	NA	NA	1	1	0	0	793	48.9927	140.723	6970	76.8333	63.8897	1.98661733051576e-14	0	806
22	19	0.500000,0.500000,	NA	NA	y1,b1,b1-NH3,y2,y2-NH3,b2,y3,y3-NH3,b4,y4,b5,y5,b6,b6-H2O,b6-NH3,b7,b7-H2O,b7-NH3,b8,b8-NH3,y9,b9,b9-NH3,y5(2+),b7(2+),b8(2+),b9(2+),y9(2+),b10(2+),	175.118951,243.145163,226.118614,303.177531,286.150982,356.229223,416.261591,399.235042,526.334743,545.304181,613.366773,659.347111,728.393713,710.383149,711.367164,842.436643,824.426079,825.410094,971.479233,954.452684,1031.511601,1084.563293,1067.536744,659.347111,842.436643,971.479233,1084.563293,1145.554528,1212.621873,	3501	0	30.5	KLGLSDNEIQR	3	1386.73	159.425	577	ubiquitinylation residue(1)	NA	NA	1	1	0	0	725	48.6034	159.425	7002	80.2938	79.1312	1.53982892970637e-12	0	1040
61	39	0.959925,0.006328,0.033747,	NA	NA	b3,b3-H2O,y3,b4,b4-H2O,b4,y4,y5,b6,b6-H2O,b6,y6,y7,b8,b8-H2O,b9,y9,y10,y11,y12,b13,y12,b13,b14,y13,y14,b16,y15,y16,y16-NH3,y16,b17,b18,y18,b19,b19-H2O,b20,b6(2+),y7(2+),y9(2+),y11(2+),y12(2+),b14(2+),y15(2+),b17(2+),b18(2+),b19(2+),y19(2+),y21(2+),y21(2+),b22(2+),y22(2+),b23(2+),y23(2+),y23(2+),y24(2+),y25(2+),y25(2+),y27(2+),	314.171036,296.160472,329.193171,385.208146,367.197582,407.190089,416.225201,517.272881,569.292936,551.282372,591.274879,604.304911,705.352591,737.382806,719.372242,856.417509,930.463931,987.485391,1100.569451,1215.596391,1216.620796,1237.578334,1238.602739,1339.650419,1344.638981,1443.707391,1535.771589,1540.760151,1641.807831,1624.781282,1663.789774,1664.814179,1779.841119,1825.892621,1892.9251…	5791	0	38.64	LAEAPSPAPTPSPTPVEDLGPQTSTSPGR	3	2879.4	236.343	577	Sodium adduct(1)	NA	NA	1	0	0	0	1493	51.7406	236.343	11582	45.1835	191.159	1.24808053177663e-44	0	61
56	31	NA	NA	NA	y4,b5,b5-H2O,y5,y6,y7,y8,b10,b10-NH3,y9,y9-H2O,y9-NH3,y10,b12,b12-H2O,b12-NH3,y11,b13,b13-NH3,y12,y12-H2O,b15,y13,b18,b7(2+),b13(2+),y13(2+),y15(2+),y16(2+),y17(2+),y18(2+),y20(2+),y21(2+),y22(2+),y23(2+),y24(2+),y25(2+),b27(2+),y26(2+),	502.334751,506.224526,488.213962,615.418811,716.466491,829.550551,958.593141,1046.490136,1029.463587,1087.635731,1069.625166,1070.609182,1216.678321,1272.658256,1254.647692,1255.631707,1345.720911,1401.700846,1384.674297,1458.804971,1440.794406,1569.790716,1614.906081,1968.018476,705.320216,1401.700846,1614.906081,1782.995951,1912.038541,2025.122601,2138.206661,2365.333651,2479.376581,2550.413691…	14720	0	78.9	GVSFDQANNLLIEPARIEEEELTLTILR	3	3183.7	163.586	577	NA	NA	NA	0	1	0	0	964	49.8408	163.586	29440	41.8695	121.716	1.71064902637754e-13	0	899
27	24	NA	NA	NA	b2,b2-NH3,y2,y2-NH3,b3,b3-H2O,b3-NH3,y3,y4,y5,y6,b7,b7-H2O,y7,b8,b8-H2O,y8,b9,y9,y10,y10-H2O,y10-NH3,y5(2+),b6(2+),y6(2+),y7(2+),y10(2+),y11(2+),b12(2+),y12(2+),b13(2+),y13(2+),	242.149916,225.123367,260.196861,243.170312,329.181946,311.171382,312.155397,374.239791,487.323851,624.382761,725.430441,757.424286,739.413722,838.514501,870.508346,852.497782,909.551611,971.556026,1056.620021,1153.672781,1135.662216,1136.646232,624.382761,686.387176,725.430441,838.514501,1153.672781,1266.756841,1335.741926,1353.788871,1448.825986,1481.847451,	9691	0	52.95	LQSLPFALTHLNLK	3	1594.93	206.653	577	NA	NA	NA	0	0	0	0	397	45.9879	206.653	19382	61.4944	145.159	2.41041656417742e-13	0	906
65	36	NA	NA	NA	b4,y3,b5,y5,b8,y7,b9,y8,y9,y11,y12,y13,b14,y15,y15-H2O,b16,y16,y16-NH3,b17,b18,b20,b20-NH3,y11(2+),y12(2+),y13(2+),y16(2+),y19(2+),b20(2+),y20(2+),y21(2+),b22(2+),b24(2+),y23(2+),b25(2+),b26(2+),y25(2+),y27(2+),y28(2+),y31(2+),	361.187016,409.219391,460.255426,650.362031,745.387896,876.457381,882.446806,963.489411,1034.526521,1202.616391,1259.637851,1356.690611,1391.658966,1554.791051,1536.780486,1559.748836,1651.843811,1634.817262,1687.807416,1784.860176,1982.960616,1965.934067,1202.616391,1259.637851,1356.690611,1651.843811,1947.992261,1982.960616,2019.029371,2134.056311,2137.034836,2305.124706,2360.151661,2376.161816…	7067	0	43.24	AFAAVPTSHPPEDAPAQPPTPGPAASPEQLSFR	3	3338.65	188.884	577	NA	NA	NA	0	0	0	0	1492	51.7377	188.884	14134	41.3172	147.567	2.64561252185466e-13	0	909
24	21	NA	NA	NA	b2,b3,b3-H2O,y2,b4,b4-H2O,y3,b5,b5-H2O,b5-NH3,y4,b6,b6-H2O,b6-NH3,b7,b7-H2O,b7-NH3,y6,b8,y7,b9,y8,b10,y9,y9-NH3,b11,y10,y11,y11-H2O,y11-NH3,b12,b12-NH3,y12,y12-H2O,y12-NH3,	241.075376,328.107406,310.096842,338.182281,441.191466,423.180902,451.266341,569.250046,551.239482,552.223497,580.308931,640.287156,622.276592,623.260607,739.355566,721.345002,722.329017,806.404281,836.408326,905.472691,965.450916,976.509801,1094.493506,1104.568381,1087.541832,1207.577566,1217.652441,1304.684471,1286.673906,1287.657922,1370.640896,1353.614347,1407.693661,1389.683096,1390.667112,	5632	0	38.08	HCSLQAVPEEIYR	2	1544.75	178.245	577	NA	NA	NA	0	0	0	0	845	49.2686	178.245	11264	34.9314	143.313	3.12201783892828e-13	0	918
24	21	NA	NA	NA	y2,b3,y3,y3-NH3,b4,b4-H2O,y4,y4-NH3,b5,b5-H2O,y5,y5-NH3,b6,b6-H2O,y6,y6-H2O,y6-NH3,b7,b7-H2O,y7,y7-H2O,y7-NH3,b8,b8,y8,y8-NH3,b9,b9-H2O,y9,b10,b10-H2O,y10,b11,b11-H2O,b11-NH3,y11,b12,b12-H2O,b12-NH3,	288.203011,330.165956,416.261591,399.235042,459.208546,441.197982,530.304521,513.277972,572.292606,554.282042,601.341631,584.315082,685.376666,667.366102,716.368571,698.358006,699.342022,798.460726,780.450162,829.452631,811.442066,812.426082,913.487666,913.487666,942.536691,925.510142,984.524776,966.514212,1055.620751,1098.567706,1080.557142,1184.663341,1226.626286,1208.615722,1209.599737,1313.70…	10913	0	58.19	SLEELLLDANQLR	2	1513.82	178.245	577	NA	NA	NA	0	0	0	0	652	48.1425	178.245	21826	42.8348	135.41	3.12201783892828e-13	0	934
30	23	NA	NA	NA	b3,y3,y3-NH3,b4,b4-H2O,y4,y4-H2O,y4-NH3,y5,y5-H2O,y5-NH3,b6,b6-H2O,b6-NH3,y6,y6-H2O,b7,b7-H2O,b7-NH3,y7,y7-NH3,b8,b8-H2O,b8-NH3,y8,y8-NH3,b9,b9-H2O,b9-NH3,y9,b10,b10-H2O,b10-NH3,y10,b11,b11-H2O,b11-NH3,y11,b12,b12-H2O,b12-NH3,y12,b13,b13-H2O,b13-NH3,y13,b15,b15-H2O,y14,y14-H2O,y14-NH3,	244.129176,343.208821,326.182272,391.197586,373.187022,472.251411,454.240846,455.224862,585.335471,567.324906,568.308922,634.283106,616.272542,617.256557,698.419531,680.408966,705.320216,687.309652,688.293667,811.503591,794.477042,819.363146,801.352582,802.336597,925.546521,908.519972,933.406076,915.395512,916.379527,1039.589451,1046.490136,1028.479572,1029.463587,1110.626561,1159.574196,1141.563…	8144	0	47.05	GVSFDQANNLLIEPAR	2	1743.9	169.973	577	NA	NA	NA	0	0	0	0	1078	50.3262	169.973	16288	56.3783	113.595	3.44202044963256e-13	0	961
63	38	0.817891,0.153355,0.028754,	NA	NA	b3,b3-H2O,y3,b4,y4,b6,y6,b7,b7-H2O,y7,y7-NH3,b8,b8,y8,b9,b9,b9,y9,y10,y11,b12,y12,b14,y13,y14,y15,y15-H2O,b17,y17,y17,b18,y18,b19,b20,b6(2+),y9(2+),y10(2+),y11(2+),b14(2+),y13(2+),y15(2+),y16(2+),b17(2+),b18(2+),b19(2+),y19(2+),y21(2+),y21(2+),y22(2+),b23(2+),y23(2+),y23(2+),y24(2+),y25(2+),y26(2+),	314.171036,296.160472,329.193171,385.208146,416.225201,591.274879,604.304911,688.327639,670.317075,705.352591,688.326042,737.382806,759.364749,833.411171,834.435566,856.417509,856.417509,930.463931,987.485391,1100.569451,1141.549979,1215.596391,1339.650419,1344.638981,1443.707391,1540.760151,1522.749586,1664.814179,1738.860591,1760.842534,1779.841119,1825.892621,1892.925179,1949.946639,591.274879…	5891	0	38.99	LAEAPSPAPTPSPTPVEDLGPQTSTSPGR	3	2879.4	217.239	577	Sodium adduct(1)	NA	NA	1	0	0	0	1555	51.9173	217.239	11782	57.2787	159.961	5.50885773160926e-36	0	107
40	29	NA	NA	NA	y2,y2-H2O,y3,y3-H2O,b4,y4,b5,y5,y5-H2O,b6,b6-H2O,y6,y6-H2O,b7,y7,y7-NH3,b8,b8-NH3,y8,b9,y9,b10,b11,b12,b13,y4(2+),b7(2+),y7(2+),y8(2+),b9(2+),b10(2+),b11(2+),b13(2+),b14(2+),b15(2+),b17(2+),	262.150981,244.140416,361.219391,343.208826,437.239446,476.246331,536.307856,589.330391,571.319826,607.344966,589.334402,718.372981,700.362416,721.387896,817.441391,800.414842,868.456306,851.429757,930.525451,999.496796,1058.584031,1127.555376,1240.639436,1339.707846,1468.750436,476.246331,721.387896,817.441391,930.525451,999.496796,1127.555376,1240.639436,1468.750436,1581.834496,1696.861436,1882…	13933	0	73.8	LPPEVANFMQLVELDVSR	3	2057.08	201.214	577	NA	NA	NA	0	0	0	0	1263	51.014	201.214	27866	74.2687	126.945	4.30254814412983e-13	0	972
59	31	0.000008,0.006541,0.992224,0.001226,0.000000,0.000000,0.000000,0.000000,	0.727273,0.136364,0.136364,	NA	y3,b4,y4,y4-NH3,b5,b5-H2O,y5,b6,b6-H2O,y6,y6,y7,b8,b8,b8,y9,b10,b10-H2O,y10,y10*,y11,b11,b11*,b13,b14,y13,b14,b14-H2O,b14,b14-H2O,y13,b15,y14,y14*,y15,y15-NH3,b16,y15,y16,y16-NH3,b18,b18-H2O,y18,y18,b20,b6(2+),b6(2+),y7(2+),y9(2+),b10(2+),y11(2+),y13(2+),y15(2+),y17(2+),y17(2+),b18(2+),y19(2+),y20(2+),y21(2+),y22(2+),b23(2+),y23(2+),y24(2+),y25(2+),y26(2+),	329.193171,385.208146,416.225201,399.198652,482.260906,464.250342,517.272881,569.292936,551.282372,604.304911,684.271242,705.352591,737.382806,759.364749,839.331080,930.463931,957.465189,939.454625,1067.451722,969.456452,1100.569451,1112.502337,1014.507067,1216.620796,1339.650419,1344.638981,1397.634807,1379.624243,1419.616750,1401.606186,1424.605312,1494.687567,1523.673722,1425.678452,1540.76015…	6145	0	39.91	LAEAPSPAPTPSPTPVEDLGPQTSTSPGR	3	2959.36	154.942	577	Phosphorylation(1)	Sodium adduct(1)	NA	2	0	0	0	1033	50.141	154.942	12290	51.5689	103.374	2.28517959082593e-18	0	510
56	21	0.993223,0.006547,0.000230,	NA	NA	y4,y5,y5-H2O,b6,b6,y6,b7,y7,y7-H2O,y7-NH3,b8,b9,b9-H2O,y9,y9-NH3,b10,b10,y10,y11,y11-H2O,y11-NH3,y12,y12-H2O,b13,b14,b16,y15,y15-NH3,b17,b18,b18-H2O,b19,y19,b20,	416.225201,517.272881,499.262316,569.292936,591.274879,604.304911,688.327639,705.352591,687.342026,688.326042,759.364749,856.417509,838.406945,930.463931,913.437382,935.483246,957.465189,987.485391,1100.569451,1082.558886,1083.542902,1215.596391,1197.585826,1216.620796,1339.650419,1535.771589,1540.760151,1523.733602,1664.814179,1779.841119,1761.830555,1892.925179,1922.945381,1949.946639,	5837	0	38.78	LAEAPSPAPTPSPTPVEDLGPQTSTSPGR	2	2879.4	73.8909	577	Sodium adduct(1)	NA	NA	1	0	0	0	1568	51.9535	73.8909	11674	26.5167	47.3742	1.4990322584647e-05	3	2546
56	21	0.000017,0.000017,0.000482,0.073133,0.073133,0.073133,0.390043,0.390043,	NA	NA	b5,y5,y6,y6,y7,y7-NH3,b8,y7,y8,y9,y9-H2O,b10,b10-H2O,y10,y10-NH3,y9,y9*,b11,y10,y11,y11-NH3,b12,b12-H2O,y11,y12,y12-H2O,y12-NH3,b13,b13-H2O,b14,y13,y15,y15-H2O,b16,y15,y15*,y16,y16-H2O,b17,b17*,b17,b17*,y17,y17-NH3,b18,b18-H2O,y17,y17-H2O,y17-NH3,b19,y18,y18-H2O,b20,	482.260906,597.239212,604.304911,684.271242,705.352591,688.326042,737.382806,785.318922,833.411171,930.463931,912.453366,935.483246,917.472682,987.485391,970.458842,1010.430262,912.434992,1032.536006,1067.451722,1100.569451,1083.542902,1119.568036,1101.557472,1180.535782,1295.562722,1277.552157,1278.536173,1296.587127,1278.576563,1317.668476,1424.605312,1540.760151,1522.749586,1593.755977,1620.72…	6163	0	39.97	LAEAPSPAPTPSPTPVEDLGPQTSTSPGR	2	2937.39	73.8909	577	Phosphorylation(1)	NA	NA	1	0	0	0	1330	51.2385	73.8909	12326	20.2897	53.6011	1.4990322584647e-05	3	2547
77	26	0.000000,0.000014,0.000074,0.000074,0.059539,0.315872,0.315872,0.315872,0.992683,	0.085702,0.457076,0.457076,0.000106,0.000020,0.000020,	NA	b3,b4,b5,b6,b6-H2O,b6,b6*,b7,b7-H2O,b8,y6,b8,b9,b9*,y8,b10,b13,b14,b14,b14-H2O,y12,b16,y13,b17,b17,b19,b19,b19-H2O,b20,b19,b14(2+),y12(2+),y13(2+),y13(2+),b18(2+),b19(2+),y17(2+),y16(2+),b20(2+),b20(2+),b19(2+),y18(2+),b21(2+),y19(2+),y20(2+),b23(2+),b24(2+),b25(2+),b25(2+),y25(2+),b28(2+),y25(2+),y28(2+),b30(2+),b30(2+),y29(2+),y30(2+),y30(2+),y31(2+),	314.171036,385.208146,482.260906,569.292936,551.282372,649.259267,551.263997,688.327639,670.317075,737.382806,764.393711,817.349137,914.401897,816.406627,976.473411,1015.449577,1238.602739,1317.668476,1339.650419,1321.639855,1491.660345,1535.771589,1566.731162,1722.798567,1744.780510,1870.943236,1892.925179,1874.914615,1949.946639,1950.909567,1339.650419,1469.678402,1508.746774,1566.731162,1779.8…	9205	0	50.95	LAEAPSPAPTPSPTPVEDLGPQTSTSPGRLSPDFAEELR	4	4196.9	78.6726	577	Phosphorylation(2)	Sodium adduct(1)	NA	3	1	0	0	441	46.4444	78.6726	18410	40.3242	38.3485	0.0163029	24	3860
76	25	0.000072,0.000013,0.000013,0.000072,0.010907,0.058172,0.310250,0.310250,0.310250,	NA	NA	b3,b4,y3,b6,b8,b9,b10,b11,b12,b12,y10,b12,y10,y10-H2O,b14,y12,y11,y13,b17,y16,b19,b20,b20-H2O,b7(2+),b10(2+),y15(2+),b18(2+),y18(2+),y19(2+),y20(2+),y22(2+),b25(2+),y24(2+),b28(2+),y26(2+),b32(2+),y33(2+),	314.171036,385.208146,417.245601,569.292936,737.382806,834.435566,935.483246,1112.502337,1119.568036,1119.568036,1176.589501,1199.534367,1256.555832,1238.545267,1317.668476,1389.712071,1412.656942,1486.764831,1642.832236,1841.842902,1870.943236,1927.964696,1909.954132,746.312027,1015.449577,1754.810872,1837.825507,1990.982831,2168.001922,2225.023382,2453.134382,2522.169757,2681.245382,2683.309676…	8886	0	49.75	LAEAPSPAPTPSPTPVEDLGPQTSTSPGRLSPDFAEELR	4	4094.96	73.3452	577	Phosphorylation(1)	NA	NA	1	1	0	0	1016	50.0689	73.3452	17772	44.6666	28.6785	0.0744358	42	4389
62	35	NA	NA	NA	y2,b4,b5,b6,y4,y4,b7,y6,y7,y8,y9,y9-NH3,y10,y10-H2O,y10-NH3,y11,y11-NH3,y12,y13,b16,y14,y14-H2O,y15,b18,b19,b19-H2O,y5(2+),y7(2+),b16(2+),b18(2+),y17(2+),b22(2+),y20(2+),y21(2+),y22(2+),b24(2+),b26(2+),y24(2+),b27(2+),y26(2+),b28(2+),	234.144831,283.140066,396.224126,453.245586,494.297301,494.297301,566.329646,650.387171,747.439931,876.482521,1004.541101,987.514552,1103.609511,1085.598946,1086.582962,1160.630971,1143.604422,1307.699381,1404.752141,1405.706976,1541.811051,1523.800486,1628.843081,1629.797916,1726.850676,1708.840112,593.365711,747.439931,1405.706976,1629.797916,1852.934021,2030.008956,2112.014451,2169.035911,2268…	8942	0	49.92	AGGPLGLSIVGGSDHSSHPFGVQEPGVFISK	4	3033.54	187.512	577	NA	NA	NA	0	0	0	0	1449	51.6107	187.512	17884	55.7541	131.758	8.35956558901149e-13	0	1001
44	30	NA	NA	NA	b2,y2,y2-NH3,b3,y3,y3-NH3,b4,y4,y4-H2O,b5,b5-NH3,y5,y5-H2O,y5,y5-H2O,y6,b7,b7-NH3,y8,y9,y10,y12,b14,b14-H2O,b14-NH3,y13,y13-H2O,y13-NH3,y15,b4(2+),b9(2+),y9(2+),y12(2+),y13(2+),y15(2+),y16(2+),y17(2+),y18(2+),y19(2+),y20(2+),y21(2+),	227.175396,288.203011,271.176462,356.217986,359.240121,342.213572,455.286396,488.282711,470.272146,569.329326,552.302777,587.351121,569.340556,587.351121,569.340556,658.388231,725.419196,708.392647,924.489731,1061.548641,1190.591231,1318.649801,1431.759016,1413.748452,1414.732467,1446.708381,1428.697816,1429.681832,1630.829551,455.286396,909.540366,1061.548641,1318.649801,1446.708381,1630.829551,…	6460	0	41.01	LLEVNGVALQGAEHHEAVEALR	3	2355.24	195.578	577	NA	NA	NA	0	0	0	0	1148	50.5994	195.578	12920	72.0417	123.537	8.53136737969048e-13	0	1002
44	30	NA	NA	NA	b2,y2,b3,y3,b4,y4,y4-NH3,b5,b5-NH3,b6,b6-NH3,y6,b7,y8,y8-NH3,y9,y10,b10,b10-NH3,y11,y12,y13,b13,y9(2+),y10(2+),y11(2+),y12(2+),y13(2+),y14(2+),b14(2+),y16(2+),y17(2+),y18(2+),y19(2+),y20(2+),	227.175396,288.203011,356.217986,401.287071,455.286396,529.345651,512.319102,569.329326,552.302777,697.387906,680.361357,699.451171,825.446486,885.515221,868.488672,1022.574131,1123.621811,1138.646636,1121.620087,1236.705871,1293.727331,1406.811391,1409.799836,1022.574131,1123.621811,1236.705871,1293.727331,1406.811391,1519.895451,1546.858746,1734.986061,1863.044641,1977.087571,2076.155981,2205.1…	10763	0	57.52	LLEVNQQSLLGLTHGEAVQLLR	3	2431.37	195.578	577	NA	NA	NA	0	0	0	0	604	47.8104	195.578	21526	50.2968	145.282	8.53136737969048e-13	0	1003
55	38	0.000000,0.000013,0.010309,0.054982,0.293238,0.054982,0.293238,0.293238,	NA	NA	b4,b4,b5,b6,y6,y6-H2O,b7,b7-H2O,y7,y8,b8,b8-H2O,y10,y11,y12,y13,b14,b15,b15-H2O,b15-NH3,b16,y16,b17,b17-H2O,b17-NH3,y10(2+),y11(2+),y12(2+),b13(2+),y13(2+),y14(2+),b16(2+),b17(2+),y17(2+),b18(2+),y18(2+),y19(2+),y20(2+),b20(2+),b21(2+),y21(2+),b22(2+),y22(2+),y23(2+),b24(2+),y24(2+),y25(2+),y26(2+),y27(2+),	413.239446,435.221389,470.260906,599.303496,644.336211,626.325646,700.351176,682.340612,731.368241,802.405351,813.435236,795.424672,1085.537421,1182.590181,1310.648761,1439.691351,1536.667579,1629.712576,1611.702012,1612.686027,1780.737109,1811.819461,1908.795689,1890.785125,1891.769140,1085.537421,1182.590181,1310.648761,1385.643046,1461.673294,1576.700234,1780.737109,1908.795689,1962.843994,200…	8243	0	47.39	LALDGETLGEEEQEDEQPPWASPSPTSR	3	3090.37	249.223	577	Sodium adduct(1)	NA	NA	1	0	0	0	607	47.8319	249.223	16486	54.27	194.953	1.38228770490236e-50	0	50
22	20	NA	NA	NA	b2,b2-H2O,y2,y2-NH3,b3,b3-H2O,y3,b4,b4-H2O,y4,y4-H2O,y5,b5,b5-H2O,y6,y6-H2O,y6-NH3,b6,y7,y7-NH3,b7,b7-H2O,b8,b8-H2O,y8,y8-H2O,b9,b9-H2O,y9,y9-H2O,b10,b10-H2O,y10,y10-H2O,y10-NH3,b11,b11-H2O,y11,y11-H2O,y11-NH3,	243.133926,225.123362,288.203011,271.176462,372.176516,354.165952,401.287071,501.219106,483.208542,502.334751,484.324186,615.418811,630.261696,612.251132,716.466491,698.455926,699.439942,743.345756,829.550551,812.524002,844.393436,826.382872,957.477496,939.466932,958.593141,940.582576,1058.525176,1040.514612,1087.635731,1069.625166,1171.609236,1153.598672,1216.678321,1198.667756,1199.651772,1284.…	9544	0	52.33	IEEEELTLTILR	2	1458.81	177.233	577	NA	NA	NA	0	0	0	0	590	47.7085	177.233	19088	38.3221	138.911	1.29440265838731e-12	0	1025
22	20	NA	NA	NA	b2,y2,y2-NH3,b3,b3-H2O,y3,y3-NH3,b4,b4-H2O,y4,y5,b5,b5-H2O,y6,y6-H2O,b6,y7,y7-H2O,y7-NH3,b7,b7-H2O,b8,b8-H2O,y8,y8-H2O,y8-NH3,b9,b9-H2O,y9,b10,b10-H2O,y10,y10-H2O,y10-NH3,b11,b11-H2O,y11,y11-H2O,y11-NH3,	243.133926,288.203011,271.176462,372.176516,354.165952,401.287071,384.260522,501.219106,483.208542,502.334751,615.418811,630.261696,612.251132,716.466491,698.455926,743.345756,829.550551,811.539986,812.524002,844.393436,826.382872,957.477496,939.466932,958.593141,940.582576,941.566592,1058.525176,1040.514612,1087.635731,1171.609236,1153.598672,1216.678321,1198.667756,1199.651772,1284.693296,1266.…	9635	0	52.69	IEEEELTLTILR	2	1458.81	177.233	577	NA	NA	NA	0	0	0	0	559	47.4741	177.233	19270	38.3221	138.911	1.29440265838731e-12	0	1027
54	30	NA	NA	NA	y3,y4,b5,b5-H2O,y5,b6,b6-H2O,y6,y7,y8,b10,b10-NH3,b11,b11-H2O,b11-NH3,y10,b12,b12-NH3,y11,b13,b13-H2O,b13-NH3,y12,y12-H2O,b15,b15-H2O,y13,b16,b17,y13(2+),y15(2+),y16(2+),y17(2+),y20(2+),y21(2+),y23(2+),y24(2+),y25(2+),b27(2+),y26(2+),	401.287071,502.334751,506.224526,488.213962,615.418811,634.283106,616.272542,716.466491,829.550551,958.593141,1046.490136,1029.463587,1159.574196,1141.563632,1142.547647,1216.678321,1272.658256,1255.631707,1345.720911,1401.700846,1383.690282,1384.674297,1458.804971,1440.794406,1569.790716,1551.780152,1614.906081,1725.891826,1838.975886,1614.906081,1782.995951,1912.038541,2025.122601,2365.333651,2…	14053	0	74.39	GVSFDQANNLLIEPARIEEEELTLTILR	3	3183.7	159.124	577	NA	NA	NA	0	1	0	0	911	49.5952	159.124	28106	47.5704	111.554	1.31681383404092e-12	0	1037
46	28	NA	NA	NA	b3,b3-H2O,y2,y2-NH3,b4,b5,b5-H2O,b5-NH3,b6,b6-H2O,b6-NH3,b7,b7-H2O,b8,b8-H2O,y9,y9-NH3,b9,b9-H2O,b11,y11,y11-H2O,y11-NH3,b13,b13,y13,b14,b14,y15,b15,y16,y15(2+),y16(2+),y17(2+),y18(2+),y19(2+),y20(2+),y21(2+),y22(2+),y23(2+),	286.176126,268.165562,303.213911,286.187362,399.260186,527.318766,509.308202,510.292217,674.387176,656.376612,657.360627,787.471236,769.460672,916.513826,898.503262,974.490121,957.463572,987.550936,969.540372,1197.687756,1218.559651,1200.549086,1201.533102,1369.736156,1369.736156,1390.608051,1498.778746,1498.778746,1600.744871,1613.805686,1671.781981,1600.744871,1671.781981,1800.824571,1913.90863…	10702	0	57.18	VSVIQFLEAPIGDEDAEEAAAEKR	3	2587.29	163.427	577	NA	NA	NA	0	1	0	0	1535	51.8611	163.427	21404	58.8894	104.538	1.45689774695747e-12	0	1038
56	32	0.000006,0.000034,0.005186,0.005186,0.027659,0.027659,0.147516,0.786753,	NA	NA	y3,b4,y4,y4-H2O,y6,b7,y7,y8,y9,y10,y10-NH3,y11,y12,b14,b14-H2O,y14,b15,b15-H2O,b15-NH3,b16,b16-NH3,b17,b17-H2O,b17-NH3,y10(2+),y11(2+),y13(2+),b15(2+),b16(2+),b17(2+),y17(2+),b18(2+),y20(2+),b20(2+),b21(2+),y21(2+),b22(2+),y22(2+),y24(2+),y25(2+),b27(2+),y27(2+),	363.198661,413.239446,460.251421,442.240856,644.336211,700.351176,731.368241,802.405351,988.484661,1085.537421,1068.510872,1182.590181,1310.648761,1536.667579,1518.657015,1576.700234,1629.712576,1611.702012,1612.686027,1780.737109,1763.710560,1908.795689,1890.785125,1891.769140,1085.537421,1182.590181,1461.673294,1651.694519,1780.737109,1908.795689,1962.843994,2005.848449,2277.950634,2288.980519,…	8354	0	47.79	LALDGETLGEEEQEDEQPPWASPSPTSR	3	3090.38	174.228	577	Sodium adduct(1)	NA	NA	1	0	0	0	650	48.1291	174.228	16708	52.8374	121.391	1.1132985874571e-19	0	457
60	27	NA	NA	NA	b5,y4,b6,y5,b7,y6,b8,y7,b9,b9-NH3,y8,y9,b10,b11,b11-H2O,b11-NH3,y10,y10-H2O,b12,b12-H2O,b12-NH3,y12,y12-NH3,b13,y13,y13-H2O,y13-NH3,b14,b14-NH3,y14,b15,b15-H2O,y16,y16-NH3,y17,y17-NH3,b18,y18,b19,y19,y19-H2O,y19-NH3,	522.303446,530.329661,593.340556,631.377341,706.424616,730.445751,820.467546,843.529811,935.494486,918.467937,957.572741,1028.609851,1034.562896,1121.594926,1103.584362,1104.568377,1141.693911,1123.683346,1234.678986,1216.668422,1217.652437,1312.758301,1295.731752,1362.737566,1411.826711,1393.816146,1394.800162,1433.774676,1416.748127,1526.853651,1546.858736,1528.848172,1680.927871,1663.901322,17…	14073	0	74.54	SLAHLALNDVSLQALPGDVGNLANLVTLELR	2	3226.79	115.051	577	NA	NA	NA	0	0	0	0	490	46.902	115.051	28146	9.91119	105.14	1.80109977690956e-12	0	1045
56	29	0.000000,0.000229,0.986762,0.006505,0.006505,	0.000105,0.002999,0.454953,0.454953,0.085304,0.000562,0.000562,0.000562,	NA	y3,b4,y4,y4-H2O,y5,y5*,y6,y6-H2O,y6*,y7,y7*,b8,b8-H2O,y8,y8-H2O,y8*,b9,b9-H2O,y10,y11,b13,b14,b15,b15-H2O,b15-NH3,b15,b15-H2O,y15,b16,b16-NH3,b17,b17-H2O,y17,b7(2+),y10(2+),y11(2+),b14(2+),y15(2+),y16(2+),b17(2+),b17(2+),y20(2+),b21(2+),b22(2+),y21(2+),y22(2+),y23(2+),y24(2+),y25(2+),y26(2+),	363.198661,413.239446,460.251421,442.240856,627.249782,529.254512,724.302542,706.291977,626.307272,811.334572,713.339302,813.435236,795.424672,882.371682,864.361117,784.376412,972.404970,954.394406,1165.503752,1262.556512,1407.624989,1514.685636,1629.712576,1611.702012,1612.686027,1651.694519,1633.683955,1763.727212,1780.737109,1763.710560,1908.795689,1890.785125,1940.862051,780.317507,1165.50375…	8581	0	48.6	LALDGETLGEEEQEDEQPPWASPSPTSR	3	3170.34	143.217	577	Phosphorylation(1)	Sodium adduct(1)	NA	2	0	0	0	228	43.5793	143.217	17162	36.4597	106.757	2.75981743131509e-14	0	814
30	25	NA	NA	NA	y1,y1-NH3,b2,y2,b3,y3,b4,y4,y5,b6,y6,y7,b7,b8,b9,y9,y9-NH3,b10,b10-H2O,b10-NH3,y10,y4(2+),y5(2+),y7(2+),y8(2+),y10(2+),b11(2+),y11(2+),y12(2+),	175.118951,158.092402,185.128446,262.150981,314.171036,375.235041,427.255096,472.287801,586.330731,613.319146,643.352191,730.384221,760.387556,847.419586,904.441046,992.479571,975.453022,1018.483976,1000.473412,1001.457427,1063.516681,472.287801,586.330731,730.384221,877.452631,1063.516681,1115.536736,1176.600741,1305.643331,	8743	0	49.19	ALEIADFSGNPLSR	3	1489.77	200.656	577	NA	NA	NA	0	0	0	0	886	49.4743	200.656	17486	51.4301	149.226	2.23804163830233e-12	0	1047
57	29	0.000000,0.421053,0.421053,0.078947,0.078947,	0.002137,0.011397,0.324177,0.324177,0.324177,0.002137,0.011397,0.000401,	NA	y4,y6,b7,b7-H2O,y6,y7,y7*,b8,y8,y8*,b9,b9-H2O,y9,y10,y10*,y11,y12,b13,b13-H2O,y13,y13-H2O,b14,b14-NH3,b14,b14-H2O,b14-NH3,b15,b15-H2O,b15,y15,y16,b17,b17-H2O,b17-NH3,y9(2+),y10(2+),b12(2+),y11(2+),y14(2+),y15(2+),b17(2+),b20(2+),y20(2+),b21(2+),y21(2+),b23(2+),y24(2+),y25(2+),y26(2+),b27(2+),	460.251421,644.336211,700.351176,682.340612,724.302542,811.334572,713.339302,813.435236,882.371682,784.376412,972.404970,954.394406,1068.450992,1165.503752,1067.508482,1262.556512,1310.648761,1407.624989,1389.614425,1519.657682,1501.647117,1536.667579,1519.641030,1616.633910,1598.623346,1599.607361,1629.712576,1611.702012,1651.694519,1763.727212,1891.785792,1908.795689,1890.785125,1891.769140,106…	8375	0	47.86	LALDGETLGEEEQEDEQPPWASPSPTSR	3	3170.34	140.57	577	Phosphorylation(1)	Sodium adduct(1)	NA	2	0	0	0	227	43.5603	140.57	16750	42.9408	97.629	1.67096101074585e-13	0	897
46	28	NA	NA	NA	y2,b3,b4,b4-H2O,b5,b5-H2O,b5-NH3,y5,b6,b6-NH3,y6,y6-H2O,y6-NH3,b7,b10,b10-H2O,b10-NH3,y9,b11,y10,y10-H2O,y10-NH3,b12,b13,b13-H2O,b13-NH3,y12,y12-H2O,y12-NH3,y5(2+),b7(2+),y11(2+),b13(2+),y12(2+),y13(2+),y14(2+),y16(2+),y17(2+),y18(2+),y19(2+),y20(2+),y21(2+),	274.187361,288.119006,425.177916,407.167352,553.236496,535.225932,536.209947,587.387511,682.279086,665.252537,700.471571,682.461006,683.445022,753.316196,1010.453746,992.443182,993.427197,1045.607411,1123.537806,1142.660171,1124.649606,1125.633622,1236.621866,1392.722976,1374.712412,1375.696427,1411.845341,1393.834776,1394.818792,587.387511,753.316196,1298.761281,1392.722976,1411.845341,1524.9294…	12620	0	66.39	DATHQEAVSALLRPCLELSLLVR	3	2534.38	163.427	577	NA	NA	NA	0	1	0	0	917	49.6237	163.427	25240	60.5475	102.88	2.41167803443426e-12	0	1051
18	18	NA	NA	NA	b2,b2,y1,b3,y2,y2-NH3,b4,b4-H2O,y3,y3-NH3,b5,b5-H2O,y4,b6,b6-NH3,y5,b7,b7-H2O,b7-NH3,y6,y6-H2O,y6-NH3,b8,b8-NH3,y7,y7-H2O,y7-NH3,b9,b9-H2O,b9-NH3,y8,y9,y9-NH3,	171.112796,171.112796,175.118951,284.196856,303.177531,286.150982,371.228886,353.218322,416.261591,399.235042,486.255826,468.245262,545.304181,600.298756,583.272207,659.347111,729.341346,711.330782,712.314797,774.374051,756.363486,757.347502,842.425406,825.398857,861.406081,843.395516,844.379532,970.483986,952.473422,953.457437,974.490141,1031.511601,1014.485052,	4393	0	33.63	LGLSDNEIQR	2	1144.6	180	577	NA	NA	NA	0	0	0	0	530	47.2428	180	8786	47.6423	132.358	2.9344931027401e-12	0	1054
18	18	NA	NA	NA	y1,b2,y2,b3,y3,y3-NH3,b4,y4,y4-NH3,b5,y5,b6,y6,y6-NH3,b7,y7,b8,b8-H2O,b8,b8-H2O,y8,y8-H2O,y8-NH3,b9,b9-NH3,y9,y9-NH3,	175.118951,213.159746,289.161881,316.168936,418.204471,401.177922,429.252996,505.236501,488.209952,544.279936,604.304911,643.348346,719.331851,702.305302,730.380376,832.415911,859.422966,841.412402,859.422966,841.412402,935.425101,917.414536,918.398552,973.465896,956.439347,1034.493511,1017.466962,	5372	0	37.09	LVCLDVSENR	2	1147.57	180	577	NA	NA	NA	0	0	0	0	566	47.5282	180	10744	63.4428	116.557	2.9344931027401e-12	0	1056
18	18	NA	NA	NA	y1,b2,y2,b3,y3,b4,b4-H2O,y4,b5,y5,b6,b6-H2O,b6,b6-H2O,y6,y6-H2O,b7,b7-H2O,y7,y7-H2O,y7-NH3,b8,b8-H2O,y8,y8-H2O,y8-NH3,b9,b9-H2O,y9,y9-H2O,y9-NH3,	175.118951,201.069226,274.187361,314.153286,387.271421,443.195876,425.185312,500.355481,556.279936,587.387511,643.311966,625.301402,643.311966,625.301402,700.471571,682.461006,756.396026,738.385462,829.514161,811.503596,812.487612,869.480086,851.469522,942.598221,924.587656,925.571672,968.548496,950.537932,1045.607411,1027.596846,1028.580862,	10400	0	55.8	PCLELSLLVR	2	1142.66	180	577	NA	NA	NA	0	0	0	0	306	44.8572	180	20800	63.4428	116.557	2.9344931027401e-12	0	1057
20	19	NA	NA	NA	y1,b2,b2-H2O,b2-NH3,y2,b3,b3-H2O,b3-NH3,y3,b4,b4-H2O,b4-NH3,y4,b5,b5-H2O,y5,b6,b6-H2O,b6-NH3,y6,b7,b7-H2O,b7-NH3,y7,y7-H2O,b8,b8-H2O,b8-NH3,y8,y8-H2O,y8-NH3,b9,b9-H2O,b9-NH3,y9,y9-H2O,y9-NH3,b10,y10,y10-NH3,	175.118951,202.082236,184.071672,185.055687,290.145891,315.166296,297.155732,298.139747,403.229951,444.208886,426.198322,427.182337,490.261981,531.240916,513.230352,577.294011,644.324976,626.314412,627.298427,690.378071,731.357006,713.346442,714.330457,777.410101,759.399536,818.389036,800.378472,801.362487,906.452691,888.442126,889.426142,931.473096,913.462532,914.446547,1019.536751,1001.526186,1…	4993	0	35.76	NSLESISSIDR	2	1220.61	177.423	577	NA	NA	NA	0	0	0	0	617	47.9029	177.423	9986	42.1236	135.3	3.1622332206909e-12	0	1061
42	29	NA	NA	NA	b2,y2,y3,y3-H2O,y4,y4-H2O,y4-NH3,b4,b5,y5,y5-H2O,y5-NH3,y6,y6-H2O,b6,y7,y8,y9,b9,y10,b10,y11,y12,b16,b5(2+),b13(2+),b14(2+),b15(2+),y16(2+),b16(2+),b17(2+),b18(2+),b19(2+),b20(2+),b21(2+),	252.109116,288.203011,375.235041,357.224476,488.319101,470.308536,471.292552,494.235766,565.272876,587.387511,569.376946,570.360962,674.419541,656.408976,678.356936,787.503601,858.540711,957.609121,1001.505046,1060.618311,1114.589106,1117.639771,1174.661231,1614.830796,565.272876,1331.641216,1430.709626,1501.746736,1610.893401,1614.830796,1701.862826,1800.931236,1914.015296,2001.047326,2114.13138…	12257	0	64.54	NHLEALPPEIGGCVALSVLSLR	3	2288.25	191.667	577	NA	NA	NA	0	0	0	0	908	49.5809	191.667	24514	57.0324	134.634	3.54665779240522e-12	0	1094
55	30	NA	NA	NA	y4,y4-NH3,y5,y5-NH3,y6,y7,y7-NH3,y8,y9,y10,b11,b11-H2O,y11,y11-H2O,b12,b13,y12,b14,y14,b16,y16,b17,b17,b15(2+),b17(2+),b18(2+),y18(2+),b20(2+),y21(2+),b22(2+),b23(2+),b24(2+),y24(2+),y26(2+),b27(2+),	516.296261,499.269712,644.354841,627.328292,715.391951,843.450531,826.423982,957.493461,1086.536051,1157.573161,1221.698996,1203.688432,1270.657221,1252.646656,1335.741926,1448.825986,1456.736531,1576.920946,1640.857701,1761.042116,1882.036721,1947.121426,1947.121426,1647.958056,1947.121426,2060.205486,2109.163711,2260.285186,2460.354361,2502.386696,2573.423806,2701.482386,2775.512641,2975.628731…	12399	0	65.29	LQSLPFALTHLNLKALWLAENQAQPMLR	3	3216.78	156.141	577	NA	NA	NA	0	1	0	0	533	47.2673	156.141	24798	40.2243	115.917	4.96254885548341e-12	0	1100
45	30	NA	NA	NA	y1,y2,y2-H2O,y2-NH3,y3,y3-H2O,y4,y4-NH3,y5,y6,b7,y7,b8,y8,y8-NH3,b9,y9,y9-H2O,y9-NH3,b10,b11,b12,b12-H2O,y4(2+),b5(2+),y5(2+),b7(2+),b8(2+),b9(2+),y9(2+),b10(2+),b12(2+),y13(2+),b14(2+),y14(2+),b15(2+),b16(2+),b17(2+),	175.118951,304.161541,286.150976,287.134992,417.245601,399.235036,530.329661,513.303112,643.413721,714.450831,760.373646,827.534891,873.457706,928.582571,911.556022,974.505386,1025.635331,1007.624766,1008.608782,1045.542496,1116.579606,1203.611636,1185.601072,530.329661,560.257556,643.413721,760.373646,873.457706,974.505386,1025.635331,1045.542496,1203.611636,1355.789261,1401.712076,1468.873321,1…	11313	0	60.05	HDHAVSLLTAASPTIALLLER	4	2228.24	191.248	577	NA	NA	NA	0	0	0	0	744	48.7157	191.248	22626	41.7957	149.453	5.77117484073931e-12	0	1108
28	24	NA	NA	NA	y1,y1-NH3,b2,b3,y2,b4,y3,b5,y4,b6,y5,b7,b7-H2O,y6,b8,b8-H2O,y7,b9,y8,y8-H2O,y8-NH3,b10,b10-H2O,y4(2+),y5(2+),y6(2+),y8(2+),y9(2+),y11(2+),b12(2+),	175.118951,158.092402,185.128446,256.165556,303.177531,327.202666,402.245941,426.271076,489.277971,523.323836,546.299431,610.355866,592.345302,617.336541,681.392976,663.382412,704.368571,738.414436,801.421331,783.410766,784.394782,825.446466,807.435902,489.277971,546.299431,617.336541,801.421331,900.489741,1042.563961,1052.573456,	3729	0	31.28	ALAAVPSAGSVQR	3	1226.68	198.641	577	NA	NA	NA	0	0	0	0	430	46.3347	198.641	7458	56.8904	141.75	6.65096250253404e-12	0	1111
28	24	NA	NA	NA	y1,b2,y2,y3,y3-NH3,b4,y4,y4-NH3,b5,b5-H2O,y5,y5-NH3,b6,b6-H2O,y6,y6-NH3,b7,y7,y7-H2O,y7-NH3,b8,b10,b4(2+),y4(2+),b6(2+),y6(2+),b7(2+),y7(2+),b8(2+),y8(2+),b11(2+),y11(2+),	175.118951,201.123366,288.203011,416.261591,399.235042,459.208546,530.304521,513.277972,572.292606,554.282042,601.341631,584.315082,685.376666,667.366102,716.368571,699.342022,798.460726,829.452631,811.442066,812.426082,913.487666,1098.567706,459.208546,530.304521,685.376666,716.368571,798.460726,829.452631,913.487666,942.536691,1226.626286,1313.705931,	10914	0	58.19	SLEELLLDANQLR	3	1513.82	198.641	577	NA	NA	NA	0	0	0	0	676	48.2995	198.641	21828	89.1229	109.518	6.65096250253404e-12	0	1112
28	24	NA	NA	NA	y1,b2,b2-H2O,y2,y3,y3-NH3,b4,y4,y4-NH3,b5,b5-H2O,y5,y5-NH3,b6,b6-H2O,y6,y6-NH3,b7,b7-H2O,y7,y7-H2O,y7-NH3,b8,y8,y9,b11,y6(2+),b7(2+),y7(2+),y8(2+),b9(2+),y9(2+),b11(2+),y11(2+),	175.118951,201.123366,183.112802,288.203011,416.261591,399.235042,459.208546,530.304521,513.277972,572.292606,554.282042,601.341631,584.315082,685.376666,667.366102,716.368571,699.342022,798.460726,780.450162,829.452631,811.442066,812.426082,913.487666,942.536691,1055.620751,1226.626286,716.368571,798.460726,829.452631,942.536691,984.524776,1055.620751,1226.626286,1313.705931,	11022	0	58.66	SLEELLLDANQLR	3	1513.82	198.641	577	NA	NA	NA	0	0	0	0	686	48.3632	198.641	22044	67.9026	130.738	6.65096250253404e-12	0	1113
54	26	0.000040,0.000213,0.006046,0.006046,0.006046,0.917126,0.032243,0.032243,	NA	NA	b3,b4,y4,b5,y6,b7,b7-H2O,y7,y8,y8-NH3,b9,b10,b10-H2O,y10,y11,b13,y13,b14,y14,y14-H2O,b15,b15,y15,y15-H2O,b17,b17-NH3,y11(2+),y13(2+),y16(2+),b17(2+),b18(2+),y19(2+),b21(2+),b22(2+),y22(2+),y24(2+),y25(2+),	298.212506,413.239446,460.251421,492.242849,644.336211,700.351176,682.340612,731.368241,802.405351,785.378802,892.438639,1021.481229,1003.470665,1085.537421,1182.590181,1385.643046,1439.691351,1536.667579,1554.718291,1536.707726,1629.712576,1651.694519,1705.742824,1687.732259,1908.795689,1891.769140,1182.590181,1461.673294,1833.801404,1908.795689,2005.848449,2220.929174,2360.017629,2447.049659,24…	8133	0	47	LALDGETLGEEEQEDEQPPWASPSPTSR	3	3090.37	119.55	577	Sodium adduct(1)	NA	NA	1	0	0	0	606	47.8247	119.55	16266	43.613	75.9369	2.58462794919944e-06	2	2241
56	30	NA	NA	NA	b4,b5,y5,y5-H2O,b6,y6,b8,b8-NH3,y8,y9,b11,y12,y12,y14,y15,b16,y7(2+),y14(2+),y15(2+),y17(2+),y18(2+),y19(2+),b20(2+),y20(2+),b21(2+),y21(2+),y22(2+),y23(2+),b24(2+),y24(2+),y25(2+),y27(2+),	437.239446,536.307856,573.324241,555.313676,607.344966,686.408301,868.456306,851.429757,912.503651,1025.587711,1240.639436,1410.758691,1410.758691,1596.859131,1711.886071,1795.929846,815.450891,1596.859131,1711.886071,1954.012721,2053.081131,2166.165191,2268.132856,2294.223771,2381.216916,2425.264261,2572.332671,2686.375601,2720.396326,2757.412711,2856.481121,3082.576471,	13726	0	72.53	LPPEVANFMQLVELDVSRNDIPEIPESIK	3	3292.72	153.249	577	NA	NA	NA	0	1	0	0	1181	50.7225	153.249	27452	51.8291	101.42	1.06722792296325e-11	0	1140
36	27	NA	NA	NA	y1,b2,b2-H2O,b2-NH3,y3,b5,b5-H2O,y6,b6,b6-H2O,y7,b7,b7-H2O,b7-NH3,y8,y8-NH3,y9,b9,b9-H2O,b9-NH3,y10,b10,b10-H2O,b10-NH3,y3(2+),b5(2+),b6(2+),y7(2+),b7(2+),b8(2+),b9(2+),y10(2+),b10(2+),y11(2+),b12(2+),y12(2+),b13(2+),y14(2+),	175.118951,216.097886,198.087322,199.071337,371.240121,471.219786,453.209222,556.320151,568.272546,550.261982,613.341611,665.325306,647.314742,648.298757,726.425671,709.399122,823.478431,875.462126,857.451562,858.435577,920.531191,932.483586,914.473022,915.457037,371.240121,471.219786,568.272546,613.341611,665.325306,762.378066,875.462126,920.531191,932.483586,1017.583951,1046.526506,1104.615981,…	4090	0	32.59	QSPASPPPLGGGAPVR	3	1487.8	194.223	577	NA	NA	NA	0	0	0	0	691	48.3948	194.223	8180	42.8348	151.388	1.11044967534338e-11	0	1142
54	21	0.249583,0.249583,0.249583,0.249583,0.001645,0.000011,0.000011,0.000000,	NA	NA	y4,b5,y5,b6,y6,b7,b7-H2O,y7,y8,b8,b10,b10-H2O,b11,y11,b12,y12,y12-H2O,y12-NH3,y13,y13-H2O,y13-NH3,b14,b14-H2O,b15,b15-H2O,b15-NH3,y15,b16,b16-NH3,y16,y16-H2O,b17,b17-H2O,b17-NH3,y17,y17-H2O,y17-NH3,	460.251421,492.242849,547.283451,621.285439,644.336211,722.333119,704.322555,731.368241,802.405351,835.417179,1021.481229,1003.470665,1150.523819,1182.590181,1279.566409,1310.648761,1292.638196,1293.622212,1439.691351,1421.680786,1422.664802,1514.685636,1496.675072,1651.694519,1633.683955,1634.667970,1683.760881,1780.737109,1763.710560,1811.819461,1793.808896,1908.795689,1890.785125,1891.769140,1…	8314	0	47.62	LALDGETLGEEEQEDEQPPWASPSPTSR	2	3090.38	77.1573	577	Sodium adduct(1)	NA	NA	1	0	0	0	662	48.2086	77.1573	16628	18.5305	58.6268	1.25267500831198e-05	2	2517
54	23	0.000000,0.000565,0.085666,0.456885,0.456885,	0.000700,0.003736,0.566759,0.106267,0.106267,0.106267,0.106267,0.003736,	NA	y3,y3*,y4,y4-NH3,y4,y5,b7,y6,y6*,y7,b8,y8,y8*,b8,y9,y9,b11,b11-H2O,y11,y13,y13-H2O,b15,b15-NH3,b17,b17-H2O,b10(2+),y10(2+),y11(2+),y15(2+),b16(2+),y15(2+),b17(2+),y18(2+),y20(2+),y21(2+),y22(2+),y24(2+),	443.164992,345.169722,460.251421,443.224872,540.217752,627.249782,700.351176,724.302542,626.307272,811.334572,813.435236,882.371682,784.376412,893.401567,1068.450992,1068.450992,1150.523819,1132.513255,1262.556512,1519.657682,1501.647117,1629.712576,1612.686027,1908.795689,1890.785125,1079.465617,1165.503752,1262.556512,1763.727212,1780.737109,1785.709155,1908.795689,2069.904641,2357.916965,2471.…	8717	0	49.09	LALDGETLGEEEQEDEQPPWASPSPTSR	3	3170.34	93.1623	577	Phosphorylation(1)	Sodium adduct(1)	NA	2	0	0	0	217	43.3646	93.1623	17434	42.9408	50.2215	0.0028315	12	3546
56	23	0.000000,0.000412,0.333196,0.333196,0.333196,	NA	NA	b4,y4,b5,b5-H2O,y4,b6,b6-H2O,y6,y6-H2O,y6-NH3,y6*,y7,y7*,b8,y8,y8-H2O,y8*,b10,b11,y10,y11,y11-H2O,y11-NH3,b12,b15,b15-H2O,b15-NH3,b16,b16-H2O,b16-NH3,b17,b17-H2O,b17-NH3,b10(2+),b10(2+),y10(2+),y11(2+),b16(2+),y15(2+),y18(2+),y20(2+),b21(2+),y25(2+),	413.239446,460.251421,470.260906,452.250342,540.217752,599.303496,581.292932,724.302542,706.291977,707.275993,626.307272,811.334572,713.339302,813.435236,882.371682,864.361117,784.376412,999.499286,1128.541876,1165.503752,1262.556512,1244.545947,1245.529963,1337.550797,1629.712576,1611.702012,1612.686027,1758.755166,1740.744602,1741.728617,1886.813746,1868.803182,1869.787197,999.499286,1079.46561…	8643	0	48.84	LALDGETLGEEEQEDEQPPWASPSPTSR	3	3148.37	89.3824	577	Phosphorylation(1)	NA	NA	1	0	0	0	346	45.3908	89.3824	17286	34.3296	55.0528	0.0291289	27	4042
43	29	NA	NA	NA	y1,b2,y2,y2-H2O,y2-NH3,y3,y3-H2O,y4,y4-NH3,y5,y6,b7,b8,y8,y9,y9-H2O,y9-NH3,b11,y11,b5(2+),y5(2+),b6(2+),b7(2+),b8(2+),b9(2+),y9(2+),b10(2+),y11(2+),b12(2+),y13(2+),b14(2+),b15(2+),b16(2+),b17(2+),b20(2+),	175.118951,253.093126,304.161541,286.150976,287.134992,417.245601,399.235036,530.329661,513.303112,643.413721,714.450831,760.373646,873.457706,928.582571,1025.635331,1007.624766,1008.608782,1116.579606,1183.704471,560.257556,643.413721,647.289586,760.373646,873.457706,974.505386,1025.635331,1045.542496,1183.704471,1203.611636,1355.789261,1401.712076,1514.796136,1585.833246,1698.917306,2054.128016,	11391	0	60.43	HDHAVSLLTAASPTIALLLER	4	2228.24	187.234	577	NA	NA	NA	0	0	0	0	729	48.6273	187.234	22782	63.3973	123.837	2.373848598799e-11	0	1163
43	29	NA	NA	NA	b2,y2,y3,y4,y4-NH3,y5,y6,y7,y9,y9-H2O,y9-NH3,y10,b11,y11,y11-H2O,y11-NH3,b12,y12,y12-H2O,y12-NH3,y13,y13-H2O,y13-NH3,b14,y14,b4(2+),b7(2+),b8(2+),b9(2+),y9(2+),b10(2+),b11(2+),b12(2+),b16(2+),b17(2+),b18(2+),b19(2+),b20(2+),	253.093126,304.161541,417.245601,530.329661,513.303112,643.413721,714.450831,827.534891,1025.635331,1007.624766,1008.608782,1112.667361,1116.579606,1183.704471,1165.693906,1166.677922,1203.611636,1254.741581,1236.731016,1237.715032,1355.789261,1337.778696,1338.762712,1401.712076,1468.873321,461.189146,760.373646,873.457706,974.505386,1025.635331,1045.542496,1116.579606,1203.611636,1585.833246,169…	11761	0	62.17	HDHAVSLLTAASPTIALLLER	3	2228.25	187.234	577	NA	NA	NA	0	0	0	0	734	48.657	187.234	23522	57.8879	129.346	2.373848598799e-11	0	1164
31	25	NA	NA	NA	y1,b2,y2,b3,b4,y4,y4-NH3,b5,y5,y5-NH3,b6,y6,y7,y7-NH3,b8,b8-H2O,b9,b10,b10-NH3,b12,b3(2+),y4(2+),y5(2+),b8(2+),y8(2+),b9(2+),b10(2+),y10(2+),y11(2+),y12(2+),	175.118951,185.128446,288.203011,371.207756,484.291816,516.296261,499.269712,555.328926,644.354841,627.328292,684.371516,715.391951,843.450531,826.423982,926.473026,908.462462,997.510136,1125.568716,1108.542167,1353.661966,371.207756,516.296261,644.354841,926.473026,957.493461,997.510136,1125.568716,1157.573161,1270.657221,1456.736531,	8511	0	48.34	ALWLAENQAQPMLR	3	1640.86	193.963	577	NA	NA	NA	0	0	0	0	1008	50.0346	193.963	17022	81.3204	112.642	2.44250084890657e-11	0	1168
26	21	NA	NA	NA	y2,y2-NH3,b3,y3,y3-NH3,b4,y4,y4-NH3,b5,y5,y5-NH3,b6,y6,y6-NH3,b7,b7-H2O,b7-NH3,y7,b8,b8-NH3,y8,b9,b9-H2O,b9-NH3,y9,y9-NH3,b10,b10-H2O,b10-NH3,y10,y10-NH3,b11,y11,y11-NH3,b12,b12-H2O,b12-NH3,b13,b13-H2O,b13-NH3,	288.203011,271.176462,371.207756,419.243501,402.216952,484.291816,516.296261,499.269712,555.328926,644.354841,627.328292,684.371516,715.391951,698.365402,798.414446,780.403882,781.387897,843.450531,926.473026,909.446477,957.493461,997.510136,979.499572,980.483587,1086.536051,1069.509502,1125.568716,1107.558152,1108.542167,1157.573161,1140.546612,1222.621476,1270.657221,1253.630672,1353.661966,133…	8509	0	48.33	ALWLAENQAQPMLR	2	1640.86	163.997	577	NA	NA	NA	0	0	0	0	986	49.9388	163.997	17018	46.8354	117.161	2.93698505981647e-11	0	1183
26	21	NA	NA	NA	y2,b3,b3-H2O,b4,y4,y4-H2O,b5,y5,b6,b6-H2O,y6,y7,y7-H2O,b7,b8,b8-H2O,y8,y8-H2O,y8-NH3,b9,b9-H2O,y9,y9-H2O,y9-NH3,b10,b10-H2O,b10-NH3,y10,y10-H2O,y10-NH3,y11,y11-H2O,y11-NH3,b12,b12-H2O,b12-NH3,y12,y12-H2O,y12-NH3,y12,y12-H2O,y12-NH3,b13,b13-NH3,	262.150981,314.171036,296.160472,427.255096,472.287801,454.277236,498.292206,586.330731,613.319146,595.308582,643.352191,730.384221,712.373656,760.387556,847.419586,829.409022,877.452631,859.442066,860.426082,904.441046,886.430482,992.479571,974.469006,975.453022,1018.483976,1000.473412,1001.457427,1063.516681,1045.506116,1046.490132,1176.600741,1158.590176,1159.574192,1228.620796,1210.610232,121…	8703	0	49.06	ALEIADFSGNPLSR	2	1489.77	163.997	577	NA	NA	NA	0	0	0	0	883	49.4596	163.997	17406	38.3221	125.674	2.93698505981647e-11	0	1184
37	27	NA	NA	NA	y2,y2-NH3,y3,y3-H2O,y4,b5,y5,b6,b6-H2O,y6,y6-H2O,b7,y7,y7-H2O,b8,b8-NH3,y8,b9,y9,y9-NH3,b10,b10-H2O,b10-NH3,b11,b12,b13,y6(2+),b7(2+),y8(2+),b10(2+),b11(2+),b12(2+),b13(2+),b14(2+),b16(2+),b17(2+),	262.150981,245.124432,361.219391,343.208826,476.246331,536.307856,589.330391,607.344966,589.334402,718.372981,700.362416,721.387896,817.441391,799.430826,868.456306,851.429757,930.525451,999.496796,1058.584031,1041.557482,1127.555376,1109.544812,1110.528827,1240.639436,1339.707846,1468.750436,718.372981,721.387896,930.525451,1127.555376,1240.639436,1339.707846,1468.750436,1581.834496,1795.929846,…	13870	0	73.43	LPPEVANFMQLVELDVSR	3	2057.08	188.981	577	NA	NA	NA	0	0	0	0	1142	50.5767	188.981	27740	60.5892	128.392	3.51062536205969e-11	0	1209
60	26	NA	NA	NA	b6,y4,y4-NH3,y4,y4-NH3,b7,y6,y7,y7-H2O,y7-NH3,b9,b9-H2O,b10,b10-H2O,y8,y8-H2O,y8-NH3,b11,b11-H2O,y9,y9-H2O,y9-NH3,b13,y10,y10-H2O,y11,b14,b15,y13,y13-H2O,y13-NH3,b16,b16-H2O,y14,y14-NH3,y15,y15-NH3,b18,b18-H2O,y16,y17,y17-NH3,b20,b20-H2O,b21,y18,y18-H2O,y18-NH3,	453.245586,494.297301,477.270752,494.297301,477.270752,566.329646,650.387171,747.439931,729.429366,730.413382,766.445736,748.435172,865.514146,847.503582,876.482521,858.471956,859.455972,922.535606,904.525042,1004.541101,986.530536,987.514552,1066.589096,1103.609511,1085.598946,1160.630971,1181.616036,1318.674946,1404.752141,1386.741576,1387.725592,1405.706976,1387.696412,1541.811051,1524.784502,…	8961	0	50.01	AGGPLGLSIVGGSDHSSHPFGVQEPGVFISK	2	3033.55	106.466	577	NA	NA	NA	0	0	0	0	1375	51.383	106.466	17922	18.5305	87.9357	3.55546772273168e-11	0	1211
44	29	NA	NA	NA	b3,y3,b4,y4,b5,y5,y5-NH3,b6,y6,y6-NH3,y6,y6-NH3,b7,y7,y8,y10,b11,y11,y12,y13,y15,b8(2+),y9(2+),y10(2+),b15(2+),y16(2+),y17(2+),y18(2+),y19(2+),b20(2+),y20(2+),y21(2+),	284.196856,346.183341,397.280916,417.220451,494.333676,516.288861,499.262312,591.386436,631.315801,614.289252,631.315801,614.289252,720.429026,744.399861,843.468271,1093.611241,1142.656786,1222.653831,1323.701511,1424.749191,1632.845211,833.513086,980.527181,1093.611241,1622.890026,1745.929271,1874.971861,1972.024621,2069.077381,2120.174956,2182.161441,2281.229851,	9315	0	51.43	LAVLPPELAHTTELHVLDVAGNR	3	2465.36	183.001	577	NA	NA	NA	0	0	0	0	825	49.1645	183.001	18630	48.7855	134.216	5.34354658907345e-11	0	1218
57	30	NA	NA	NA	b3,y2,y2-NH3,y3,y4,y4-H2O,y4-NH3,y5,y5-H2O,y6,y6-H2O,y7,b9,b10,b10-NH3,b11,b11-NH3,b12,b12-NH3,y5(2+),y6(2+),b9(2+),y8(2+),b10(2+),b12(2+),y11(2+),b13(2+),y15(2+),y16(2+),b18(2+),y17(2+),b19(2+),y18(2+),b20(2+),b21(2+),b22(2+),b25(2+),b26(2+),	244.129176,288.203011,271.176462,401.287071,502.334751,484.324186,485.308202,615.418811,597.408246,716.466491,698.455926,829.550551,933.406076,1046.490136,1029.463587,1159.574196,1142.547647,1272.658256,1255.631707,615.418811,716.466491,933.406076,958.593141,1046.490136,1272.658256,1345.720911,1401.700846,1782.995951,1912.038541,1968.018476,2025.122601,2097.061066,2138.206661,2226.103656,2355.146…	13095	0	68.95	GVSFDQANNLLIEPARIEEEELTLTILR	4	3183.69	150.445	577	NA	NA	NA	0	1	0	0	982	49.9211	150.445	26190	58.3129	92.1319	5.73881654976362e-11	0	1219
34	23	NA	NA	NA	y3,y4,b5,y5,b6,b6-H2O,y6,b7,y7,b8,b8-NH3,y8,y9,y9-H2O,y9-NH3,y10,b11,b11-NH3,y11,b12,b12-NH3,y12,b13,b13-H2O,b13-NH3,y13,b14,y14,y15,y15-NH3,y16,y16-NH3,b17,	361.219391,476.246331,536.307856,589.330391,607.344966,589.334402,718.372981,721.387896,817.441391,868.456306,851.429757,930.525451,1058.584031,1040.573466,1041.557482,1189.624521,1240.639436,1223.612887,1336.692931,1339.707846,1322.681297,1450.735861,1468.750436,1450.739872,1451.723887,1521.772971,1581.834496,1620.841381,1749.883971,1732.857422,1846.936731,1829.910182,1882.961876,	14038	0	74.28	LPPEVANFMQLVELDVSR	2	2057.07	150.243	577	NA	NA	NA	0	0	0	0	1230	50.8991	150.243	28076	30.3486	119.894	7.45050835402472e-11	0	1237
46	28	0.842104,0.157895,0.000001,	NA	NA	b3,y3,b4,y4,b5,y5,y6,y6-H2O,y6-NH3,y7,y8,y9,y11,b13,y13,b14,b8(2+),b10(2+),y10(2+),b11(2+),b13(2+),b14(2+),b16(2+),y16(2+),b17(2+),b18(2+),y18(2+),b19(2+),y19(2+),y20(2+),y21(2+),b22(2+),	284.196856,346.183341,397.280916,417.220451,494.333676,516.288861,631.315801,613.305236,614.289252,744.399861,843.468271,980.527181,1222.653831,1394.728999,1446.731134,1507.813059,833.513086,1063.591049,1093.611241,1164.638729,1394.728999,1507.813059,1743.940379,1745.929271,1857.024439,1972.051379,1994.006564,2071.119789,2091.059324,2204.143384,2303.211794,2313.221289,	9235	0	51.07	LAVLPPELAHTTELHVLDVAGNR	3	2487.33	163.427	577	Sodium adduct(1)	NA	NA	1	0	0	0	1077	50.3222	163.427	18470	54.27	109.157	3.78264067615409e-15	0	735
46	25	NA	NA	NA	y4,b5,b5-H2O,y5,y6,b7,y7,b8,y8,b9,b9-H2O,y10,y11,b12,y12,y13,b14,b15,y15,b16,y16,b17,b17-NH3,y17,b18,y18,y18-H2O,b19,b19-H2O,y19,	458.308531,514.250746,496.240182,557.376941,670.461001,698.335536,741.498111,795.388296,840.566521,852.409756,834.399192,1026.630571,1141.657511,1206.563686,1270.700101,1399.742691,1450.633216,1507.654676,1624.854031,1636.697266,1681.875491,1735.765676,1718.739127,1778.928251,1806.802786,1865.960281,1847.949716,1919.886846,1901.876282,1963.013041,	10466	0	56.07	SLEPSPSPGPQEEDGEVALVLLGR	2	2476.26	130.788	577	NA	NA	NA	0	0	0	0	1502	51.7667	130.788	20932	38.0998	92.6886	7.7833671612052e-11	0	1239
30	22	NA	NA	NA	b2,y3,b4,b4-H2O,b4-NH3,b5,b5-H2O,b5-NH3,y5,y6,b6,b6-H2O,b6-NH3,y7,b7,b7-H2O,b7-NH3,y8,y9,y10,b10,b10-NH3,b11,b11-NH3,y11,y11-NH3,b12,b12-NH3,y12,b13,b13-H2O,b13-NH3,y13,b14,y14,b15,b15-H2O,b15-NH3,	216.097886,371.240121,384.187756,366.177192,367.161207,471.219786,453.209222,454.193237,499.298691,556.320151,568.272546,550.261982,551.245997,613.341611,665.325306,647.314742,648.298757,726.425671,823.478431,920.531191,932.483586,915.457037,989.505046,972.478497,1017.583951,1000.557402,1046.526506,1029.499957,1104.615981,1117.563616,1099.553052,1100.537067,1175.653091,1214.616376,1272.705851,131…	4140	0	32.77	QSPASPPPLGGGAPVR	2	1487.8	155.817	577	NA	NA	NA	0	0	0	0	648	48.1157	155.817	8280	26.2231	129.594	8.04780242820702e-11	0	1241
29	24	NA	NA	NA	y1,y1-NH3,b2,y2,y2-NH3,y3,y4,y5,b6,b6-H2O,b6-NH3,b7,b7-H2O,b7-NH3,y6,y6-H2O,b8,b8-NH3,y8,b9,b9-H2O,b9-NH3,y9,y9-H2O,y9-NH3,b10,y4(2+),y5(2+),b7(2+),y6(2+),y7(2+),b8(2+),y8(2+),b9(2+),b10(2+),y11(2+),	175.118951,158.092402,213.159746,246.156061,229.129512,375.198651,476.246331,575.314741,584.340226,566.329662,567.313677,683.408636,665.398072,666.382087,690.341681,672.331116,798.435576,781.409027,846.431551,897.503986,879.493422,880.477437,960.474481,942.463916,943.447932,998.551666,476.246331,575.314741,683.408636,690.341681,789.410091,798.435576,846.431551,897.503986,998.551666,1160.590571,	6323	0	40.54	VLSINGVDVTEAR	3	1372.74	191.444	577	NA	NA	NA	0	0	0	0	564	47.5128	191.444	12646	56.0143	135.43	8.25161190433518e-11	0	1253
34	23	NA	NA	NA	y3,b5,y4,y6,b7,y7,y7-H2O,b8,b10,y9,y10,y10-H2O,y10-NH3,b11,b11-H2O,b11-NH3,y11,y11-H2O,y11-NH3,b12,b13,y12,b14,b14-H2O,b14-NH3,y13,y13-NH3,b15,b15-H2O,y14,y15,y15-H2O,b16,b16-NH3,y16,y16-NH3,b17,b17-H2O,	347.228891,437.189146,494.297301,664.402821,690.343016,793.445411,775.434846,805.369956,1003.470396,1009.520031,1106.572791,1088.562226,1089.546242,1118.497336,1100.486772,1101.470787,1221.599731,1203.589166,1204.573182,1247.539926,1304.561386,1377.700841,1417.645446,1399.634882,1400.618897,1474.753601,1457.727052,1564.713856,1546.703292,1588.796531,1645.817991,1627.807426,1677.797916,1660.771367…	4062	0	32.51	GHAGNPRDPTDEGIFISK	2	1910.94	150.243	577	NA	NA	NA	0	1	0	0	1099	50.41	150.243	8124	37.5911	112.652	9.22493478348173e-11	0	1255
45	27	NA	NA	NA	b3,b3-H2O,b3-NH3,b4,b4-NH3,y6,y8,y9,y10,y12,b12,b13,b13-NH3,b14,b14-H2O,b14-NH3,y8(2+),y9(2+),y10(2+),y12(2+),b12(2+),y13(2+),b14(2+),y14(2+),y15(2+),y16(2+),y17(2+),b18(2+),y18(2+),y19(2+),y20(2+),b21(2+),y21(2+),	315.166296,297.155732,298.139747,444.208886,427.182337,615.346031,841.441381,928.473411,1041.557471,1326.701171,1331.643736,1444.727796,1427.701247,1531.759826,1513.749262,1514.733277,841.441381,928.473411,1041.557471,1326.701171,1331.643736,1441.728111,1531.759826,1554.812171,1641.844201,1728.876231,1841.960291,1911.929396,1928.992321,2058.034911,2171.118971,2226.088406,2258.151001,	6472	0	41.07	NSLESISSIDRELSPEGPGKEK	3	2372.19	155.572	577	NA	NA	NA	0	2	0	0	1521	51.8213	155.572	12944	57.0324	98.5395	1.01077427490797e-10	0	1257
38	24	NA	NA	NA	y3,y4,b4,b4-NH3,y5,y5-H2O,b5,b5-NH3,y6,y6-H2O,y6-NH3,y7,y7-H2O,y8,y8-H2O,y9,y9-H2O,y9-NH3,y10,y11,y11-H2O,y11-NH3,b11,b11-H2O,b11-NH3,y12,b12,b12-NH3,y13,y13-NH3,b13,b13-NH3,y14,y14-NH3,b14,b14-H2O,b14-NH3,y15,y15-H2O,y16,y16-NH3,b16,b16-H2O,b16-NH3,y17,b17,b17-NH3,b19,	301.187021,358.208481,444.208886,427.182337,487.251071,469.240506,531.240916,514.214367,584.303831,566.293266,567.277282,671.335861,653.325296,784.419921,766.409356,913.462511,895.451946,896.435962,1069.563621,1184.590561,1166.579996,1167.564012,1202.601146,1184.590582,1185.574597,1297.674621,1331.643736,1314.617187,1384.706651,1367.680102,1444.727796,1427.701247,1471.738681,1454.712132,1531.7598…	7250	0	43.87	NSLESISSIDRELSPEGPGK	2	2115.06	146.275	577	NA	NA	NA	0	1	0	0	1347	51.2937	146.275	14500	46.0328	100.242	1.14768150934688e-10	0	1262
54	29	NA	NA	NA	b4,y5,y6,y7,y8,b11,b11-NH3,y10,b12,b12-NH3,y11,b13,y12,b15,b8(2+),b13(2+),y15(2+),y16(2+),b18(2+),y17(2+),y18(2+),y19(2+),y20(2+),y21(2+),y22(2+),y23(2+),b24(2+),y24(2+),y25(2+),b27(2+),y26(2+),	391.197586,615.418811,716.466491,829.550551,958.593141,1159.574196,1142.547647,1216.678321,1272.658256,1255.631707,1345.720911,1401.700846,1458.804971,1569.790716,819.363146,1401.700846,1782.995951,1912.038541,1968.018476,2025.122601,2138.206661,2251.290721,2365.333651,2479.376581,2550.413691,2678.472271,2682.362046,2793.499211,2940.567621,3009.577846,3027.599651,	13873	0	73.44	GVSFDQANNLLIEPARIEEEELTLTILR	3	3183.7	148.759	577	NA	NA	NA	0	1	0	0	905	49.5665	148.759	27746	39.1658	109.593	1.15911901618287e-10	0	1263
54	29	NA	NA	NA	b4,b4-H2O,y3,y4,y4-NH3,b5,b5-H2O,y5,b7,b7-H2O,b7-NH3,y6,y7,y8,b10,b10-NH3,y9,y9-H2O,y9-NH3,b11,b11-NH3,b12,b12-NH3,y11,b13,b13-NH3,y12,y12-H2O,y15,y15-H2O,y15-NH3,y16,b10(2+),y15(2+),y16(2+),y17(2+),y18(2+),y19(2+),y20(2+),y21(2+),y23(2+),y24(2+),y26(2+),	391.197586,373.187022,401.287071,502.334751,485.308202,506.224526,488.213962,615.418811,705.320216,687.309652,688.293667,716.466491,829.550551,958.593141,1046.490136,1029.463587,1087.635731,1069.625166,1070.609182,1159.574196,1142.547647,1272.658256,1255.631707,1345.720911,1401.700846,1384.674297,1458.804971,1440.794406,1782.995951,1764.985386,1765.969402,1912.038541,1046.490136,1782.995951,1912.…	14174	0	75.14	GVSFDQANNLLIEPARIEEEELTLTILR	3	3183.7	148.759	577	NA	NA	NA	0	1	0	0	899	49.5376	148.759	28348	52.8633	95.8959	1.15911901618287e-10	0	1264
54	29	NA	NA	NA	b4,y4,b5,b5-H2O,y5,b6,y6,b8,y7,y8,y9,y9-H2O,y9-NH3,y10,b12,b12-NH3,y11,b13,b13-H2O,y12,y12-NH3,y11(2+),y15(2+),y16(2+),y17(2+),y18(2+),b20(2+),y19(2+),y20(2+),y21(2+),y22(2+),y23(2+),y24(2+),b27(2+),y26(2+),	391.197586,502.334751,506.224526,488.213962,615.418811,634.283106,716.466491,819.363146,829.550551,958.593141,1087.635731,1069.625166,1070.609182,1216.678321,1272.658256,1255.631707,1345.720911,1401.700846,1383.690282,1458.804971,1441.778422,1345.720911,1782.995951,1912.038541,2025.122601,2138.206661,2226.103656,2251.290721,2365.333651,2479.376581,2550.413691,2678.472271,2793.499211,3009.577846,3…	15243	0	83.25	GVSFDQANNLLIEPARIEEEELTLTILR	3	3183.69	148.759	577	NA	NA	NA	0	1	0	0	987	49.9432	148.759	30486	37.5039	111.255	1.15911901618287e-10	0	1265
24	20	NA	NA	NA	b3,y2,y3,b4,b4-H2O,y4,b5,b5-H2O,b5-NH3,y5,y6,b6,y7,b7,b7-H2O,b8,b8-H2O,b8-NH3,y8,b9,y9,y9-H2O,y9-NH3,b10,b11,b11-H2O,y10,y10-H2O,y11,b12,	288.119006,288.203011,401.287071,425.177916,407.167352,472.324181,553.236496,535.225932,536.209947,559.356211,658.424621,682.279086,729.461731,753.316196,735.305632,852.384606,834.374042,835.358057,858.504321,939.416636,986.562901,968.552336,969.536352,1010.453746,1123.537806,1105.527242,1123.621811,1105.611246,1224.669491,1236.621866,	5401	0	37.21	DATHQEAVSALLR	2	1410.73	161.474	577	NA	NA	NA	0	0	0	0	776	48.8986	161.474	10802	42.2287	119.246	1.94848501277546e-10	0	1292
24	20	NA	NA	NA	b2,b3,b3-H2O,y2,y2-NH3,b4,b4-H2O,y3,b5,b5-H2O,b5-NH3,y4,b6,b6-H2O,b6-NH3,b7,b7-H2O,b7-NH3,y6,y7,b9,b9-H2O,y8,b10,b10-H2O,y9,y9-NH3,b11,y10,y11,y11-H2O,y11-NH3,b12,b12-NH3,y12,y12-NH3,	241.075376,328.107406,310.096842,338.182281,321.155732,441.191466,423.180902,451.266341,569.250046,551.239482,552.223497,580.308931,640.287156,622.276592,623.260607,739.355566,721.345002,722.329017,806.404281,905.472691,965.450916,947.440352,976.509801,1094.493506,1076.482942,1104.568381,1087.541832,1207.577566,1217.652441,1304.684471,1286.673906,1287.657922,1370.640896,1353.614347,1407.693661,13…	5541	0	37.72	HCSLQAVPEEIYR	2	1544.75	161.474	577	NA	NA	NA	0	0	0	0	854	49.3146	161.474	11082	30.5616	130.913	1.94848501277546e-10	0	1293
24	20	NA	NA	NA	y2,y2-NH3,b3,b3-H2O,y3,y3-NH3,b4,b4-H2O,y4,y4-NH3,b5,b5-H2O,y5,y5-NH3,b6,b6-H2O,y6,y6-NH3,b7,b7-H2O,y7,y7-H2O,y7-NH3,b8,b8-H2O,y8,y8-H2O,y8-NH3,b9,b9-H2O,y9,y9-H2O,y9-NH3,b10,b10-H2O,b10-NH3,y10,y10-H2O,y10-NH3,b11,b11-H2O,b11-NH3,y11,y11-NH3,b12,b12-H2O,b12-NH3,	288.203011,271.176462,330.165956,312.155392,416.261591,399.235042,459.208546,441.197982,530.304521,513.277972,572.292606,554.282042,601.341631,584.315082,685.376666,667.366102,716.368571,699.342022,798.460726,780.450162,829.452631,811.442066,812.426082,913.487666,895.477102,942.536691,924.526126,925.510142,984.524776,966.514212,1055.620751,1037.610186,1038.594202,1098.567706,1080.557142,1081.5411…	10824	0	57.82	SLEELLLDANQLR	2	1513.82	161.474	577	NA	NA	NA	0	0	0	0	663	48.2151	161.474	21648	42.2287	119.246	1.94848501277546e-10	0	1306
24	20	NA	NA	NA	y2,b3,b3-H2O,y3,y3-NH3,b4,b4-H2O,y4,y4-NH3,b5,b5-H2O,y5,b6,b6-H2O,y6,y6-NH3,b7,b7-H2O,y7,y7-NH3,b8,b8-H2O,y8,y8-NH3,b9,b9-H2O,y9,b10,y10,y10-H2O,b11,b11-H2O,b11-NH3,y11,y11-NH3,b12,b12-H2O,b12-NH3,	288.203011,330.165956,312.155392,416.261591,399.235042,459.208546,441.197982,530.304521,513.277972,572.292606,554.282042,601.341631,685.376666,667.366102,716.368571,699.342022,798.460726,780.450162,829.452631,812.426082,913.487666,895.477102,942.536691,925.510142,984.524776,966.514212,1055.620751,1098.567706,1184.663341,1166.652776,1226.626286,1208.615722,1209.599737,1313.705931,1296.679382,1339.…	11007	0	58.58	SLEELLLDANQLR	2	1513.82	161.474	577	NA	NA	NA	0	0	0	0	678	48.3123	161.474	22014	39.3241	122.15	1.94848501277546e-10	0	1307
24	20	NA	NA	NA	y2,b3,y3,b4,b4-H2O,y4,y4-NH3,b5,b5-H2O,y5,y5-NH3,b6,b6-H2O,y6,y6-NH3,b7,b7-H2O,y7,y7-H2O,y7-NH3,b8,y8,y8-H2O,b9,b9-H2O,y9,b10,y10,b11,b11-H2O,b11-NH3,y11,b12,b12-H2O,b12-NH3,	288.203011,330.165956,416.261591,459.208546,441.197982,530.304521,513.277972,572.292606,554.282042,601.341631,584.315082,685.376666,667.366102,716.368571,699.342022,798.460726,780.450162,829.452631,811.442066,812.426082,913.487666,942.536691,924.526126,984.524776,966.514212,1055.620751,1098.567706,1184.663341,1226.626286,1208.615722,1209.599737,1313.705931,1339.710346,1321.699782,1322.683797,	11081	0	58.94	SLEELLLDANQLR	2	1513.82	161.474	577	NA	NA	NA	0	0	0	0	652	48.1425	161.474	22162	36.2107	125.264	1.94848501277546e-10	0	1308
64	34	NA	NA	NA	y2,y3,y3-H2O,y3-NH3,y4,y4-NH3,y5,b7,y6,y7,b9,y8,y9,y9-NH3,b10,b11,b11-H2O,b12,b12-H2O,y12,b13,y13,y13-H2O,y13-NH3,b14,b15,y16,b9(2+),b10(2+),b11(2+),b13(2+),y13(2+),b14(2+),b15(2+),y16(2+),y17(2+),y18(2+),y19(2+),b21(2+),y21(2+),b23(2+),b25(2+),	288.203011,417.245601,399.235036,400.219052,530.329661,513.303112,631.377341,706.424616,730.445751,843.529811,935.494486,957.572741,1028.609851,1011.583302,1034.562896,1121.594926,1103.584362,1234.678986,1216.668422,1312.758301,1362.737566,1411.826711,1393.816146,1394.800162,1433.774676,1546.858736,1680.927871,935.494486,1034.562896,1121.594926,1362.737566,1411.826711,1433.774676,1546.858736,1680…	14004	0	74.13	SLAHLALNDVSLQALPGDVGNLANLVTLELR	4	3226.79	171.2	577	NA	NA	NA	0	0	0	0	543	47.348	171.2	28008	47.5704	123.629	2.49031846944829e-10	0	1322
50	23	0.000037,0.000195,0.157858,0.841910,	NA	NA	b3,b3-H2O,y3,b4,b4-H2O,b4,y4,y4-NH3,b5,y5,y6,b7,y7,y7-H2O,b8,y8,y9,y9-H2O,y9-NH3,b12,y11,y11-NH3,b16,y11(2+),y11(2+),b16(2+),y15(2+),b18(2+),y19(2+),y20(2+),y21(2+),y22(2+),y23(2+),b24(2+),	372.176516,354.165952,401.287071,485.260576,467.250012,507.242519,515.330001,498.303452,582.313336,643.388581,730.420611,782.393036,843.504671,825.494106,895.477096,956.588731,1069.672791,1051.662226,1052.646242,1243.654429,1307.729354,1290.702805,1685.897169,1285.747411,1307.729354,1685.897169,1724.068001,1912.065289,2102.219514,2173.256624,2270.309384,2383.393444,2512.436034,2580.451009,	16123	0	94.74	LEELPAELGGLVLLTDLLLSQNLLR	3	2754.56	101.445	577	Sodium adduct(1)	NA	NA	1	0	0	0	459	46.6181	101.445	32246	30.068	71.3771	0.00447231	15	3599
43	30	0.001234,0.998534,0.000231,0.000000,	NA	NA	b2,b3,y3,y3-NH3,b3,b3-H2O,b4,y4,y4-H2O,y5,y6,y8,y8-H2O,b10,y9,b12,b13,b13,b13-NH3,y12,y12-NH3,b14,b14-NH3,b15,y15,b4(2+),b9(2+),y8(2+),y9(2+),y11(2+),y12(2+),b14(2+),y15(2+),b16(2+),y16(2+),b17(2+),y17(2+),b18(2+),y18(2+),b19(2+),y19(2+),y20(2+),b21(2+),y21(2+),	227.175396,356.217986,359.240121,342.213572,378.199929,360.189365,455.286396,488.282711,470.272146,587.351121,658.388231,924.489731,906.479166,1059.580889,1061.548641,1187.639459,1294.700106,1316.682049,1299.655500,1318.649801,1301.623252,1453.740959,1436.714410,1568.817926,1630.829551,455.286396,909.540366,924.489731,1061.548641,1283.610284,1340.631744,1453.740959,1652.811494,1719.842459,1751.87…	6490	0	41.13	LLEVNGVALQGAEHHEAVEALR	3	2377.22	200.11	577	Sodium adduct(1)	NA	NA	1	0	0	0	1380	51.3988	200.11	12980	74.8486	125.262	7.18671738268885e-27	0	214
55	29	NA	NA	NA	y3,y4,y5,y6,y7,y8,b10,b10-NH3,y9,y9-H2O,y9-NH3,b11,b11-H2O,b11-NH3,y10,b12,b12-NH3,y11,b13,b13-NH3,y12,y12-NH3,y13,y13-H2O,y11(2+),y13(2+),y15(2+),y16(2+),y17(2+),y18(2+),y19(2+),y20(2+),y21(2+),y22(2+),y23(2+),y24(2+),b26(2+),y25(2+),	401.287071,502.334751,615.418811,716.466491,829.550551,958.593141,1046.490136,1029.463587,1087.635731,1069.625166,1070.609182,1159.574196,1141.563632,1142.547647,1216.678321,1272.658256,1255.631707,1345.720911,1401.700846,1384.674297,1458.804971,1441.778422,1614.906081,1596.895516,1345.720911,1614.906081,1782.995951,1912.038541,2025.122601,2138.206661,2251.290721,2365.333651,2479.376581,2550.4136…	13951	0	73.88	GVSFDQANNLLIEPARIEEEELTLTILR	3	3183.7	145.945	577	NA	NA	NA	0	1	0	0	913	49.6047	145.945	27902	39.1658	106.78	3.6673832136964e-10	0	1333
55	29	NA	NA	NA	b4,y3,y4,y4-NH3,b5,b5-H2O,y5,y6,y6-H2O,y7,y8,y9,y9-H2O,y9-NH3,b11,b11-NH3,y10,b12,b12-H2O,b12-NH3,y11,b13,b13-H2O,b13-NH3,y12,y12-H2O,y15,y15-H2O,y15-NH3,y15,y15-H2O,y15-NH3,b17,y5(2+),y15(2+),y16(2+),y17(2+),y18(2+),y19(2+),y20(2+),y22(2+),y24(2+),y25(2+),y26(2+),	391.197586,401.287071,502.334751,485.308202,506.224526,488.213962,615.418811,716.466491,698.455926,829.550551,958.593141,1087.635731,1069.625166,1070.609182,1159.574196,1142.547647,1216.678321,1272.658256,1254.647692,1255.631707,1345.720911,1401.700846,1383.690282,1384.674297,1458.804971,1440.794406,1782.995951,1764.985386,1765.969402,1782.995951,1764.985386,1765.969402,1838.975886,615.418811,178…	14341	0	76.22	GVSFDQANNLLIEPARIEEEELTLTILR	3	3183.7	145.945	577	NA	NA	NA	0	1	0	0	953	49.7909	145.945	28682	39.5868	106.359	3.6673832136964e-10	0	1334
20	18	NA	NA	NA	b2,b2-NH3,b3,b3-NH3,y2,y2-NH3,b4,b4-NH3,y3,b5,b5-H2O,y4,b6,b6-H2O,b6-NH3,y5,b7,y6,y6-H2O,y6-NH3,b8,b8-NH3,y7,y7-H2O,y7-NH3,b9,b9-H2O,b9-NH3,y8,y8-H2O,y9,y9-H2O,y9-NH3,b10,y10,y10-H2O,y10-NH3,	242.186296,225.159747,299.207756,282.181207,303.177531,286.150982,412.291816,395.265267,416.261591,499.323846,481.313282,545.304181,614.350786,596.340222,597.324237,659.347111,728.393716,774.374051,756.363486,757.347502,857.436306,840.409757,861.406081,843.395516,844.379532,970.520366,952.509802,953.493817,974.490141,956.479576,1031.511601,1013.501036,1014.485052,1098.578946,1144.595661,1126.5850…	3379	0	30.07	KLGLSDNEIQR	2	1272.69	158.077	577	NA	NA	NA	0	1	0	0	678	48.3123	158.077	6758	46.8021	111.275	4.28182525600485e-10	0	1337
44	29	1.000000,	NA	NA	b2,b3,b3-H2O,y3,b4,b4-H2O,y4,y5,y6,y7,y8,y9,y10,y11,y12,b14,y13,y5(2+),b9(2+),y8(2+),y9(2+),y10(2+),y12(2+),y13(2+),b16(2+),b17(2+),y18(2+),b19(2+),y19(2+),y20(2+),y21(2+),	227.175396,356.217986,338.207422,359.240121,455.286396,437.275832,488.282711,587.351121,658.388231,787.430821,924.489731,1061.548641,1190.591231,1261.628341,1318.649801,1414.732467,1429.681832,587.351121,909.540366,924.489731,1061.548641,1190.591231,1318.649801,1429.681832,1680.833967,1751.871077,1883.935802,1979.982077,1983.004212,2112.046802,2225.130862,	7418	0	44.45	LLEVNGVALQGAEHHEAVEALR	3	2338.21	183.001	577	Pyro-glu from Q(1)	NA	NA	1	0	0	0	1323	51.2156	183.001	14836	53.5167	129.485	7.31502418693011e-21	0	415
49	30	NA	NA	NA	y2,b3,y3,y3-NH3,y4,b5,b5-H2O,y5,y6,b7,b7-H2O,y7,y8,y10,y10-NH3,b11,y11,y11-H2O,y11-NH3,b13,b17,b18,b18-H2O,b11(2+),y11(2+),b14(2+),y16(2+),b17(2+),y17(2+),b18(2+),b19(2+),y19(2+),b20(2+),b21(2+),y21(2+),b22(2+),b23(2+),	232.140411,330.165956,345.224471,328.197922,458.308531,514.250746,496.240182,557.376941,670.461001,698.335536,680.324972,741.498111,840.566521,1026.630571,1009.604022,1077.521096,1141.657511,1123.646946,1124.630962,1335.606276,1735.765676,1806.802786,1788.792222,1077.521096,1141.657511,1450.633216,1681.875491,1735.765676,1778.928251,1806.802786,1919.886846,1963.013041,2018.955256,2132.039316,2147…	10383	0	55.71	SLEPSPSPGPQEEDGEVALVLLGR	3	2476.26	175.636	577	NA	NA	NA	0	0	0	0	1525	51.8327	175.636	20766	57.8879	117.748	4.597970905106e-10	0	1343
36	23	NA	NA	NA	b3,y4,y6,b6,b6-H2O,b6-NH3,y7,b7,b7-H2O,b7-NH3,b8,b8-H2O,b8-NH3,y9,y10,b9,b9-H2O,b9-NH3,b10,b10-H2O,b10-NH3,y11,y11-NH3,y12,y12-H2O,b12,b12-H2O,b12-NH3,y13,b13,b13-H2O,b13-NH3,y14,b14,b14-H2O,b14-NH3,b15,b15-H2O,b15-NH3,y16,b16,b16-H2O,b16-NH3,y17,b18,b18-H2O,b18-NH3,	340.186686,374.214631,604.304901,626.314406,608.303842,609.287857,675.342011,739.398466,721.387902,722.371917,876.457376,858.446812,859.430827,901.437361,958.458821,1062.536686,1044.526122,1045.510137,1119.558146,1101.547582,1102.531597,1144.538131,1127.511582,1281.597041,1263.586476,1345.653496,1327.642932,1328.626947,1394.681101,1416.690606,1398.680042,1399.664057,1495.728781,1517.738286,1499.7…	6431	0	40.92	ELPGQTLHWGPEATEAAGR	2	2019.99	142.043	577	NA	NA	NA	0	0	0	0	1267	51.0278	142.043	12862	34.9526	107.091	4.74989292578796e-10	0	1349
75	36	NA	NA	NA	b3,y3,y3-NH3,y5,b6,b6,y6,y6-NH3,b7,b7-NH3,y7,b8,b9,b10,b11,y11,b12,b12-NH3,b13,b14,b14-H2O,b15,b15-NH3,y15,y15-NH3,y16,b17,b18,b10(2+),b11(2+),b13(2+),b14(2+),b15(2+),y15(2+),y18(2+),y20(2+),y21(2+),y22(2+),y23(2+),y24(2+),y25(2+),y26(2+),y28(2+),	339.202676,343.208821,326.182272,626.340891,636.335136,636.335136,697.378001,680.351452,735.403546,718.376997,834.436911,834.471956,905.509066,1018.593126,1131.677186,1239.612971,1259.735766,1242.709217,1316.757226,1447.797716,1429.787152,1575.856296,1558.829747,1636.787961,1619.761412,1707.825071,1787.935996,1844.957456,1018.593126,1131.677186,1316.757226,1447.797716,1575.856296,1636.787961,1903…	11486	0	60.87	LPQPEAVVALLQGMQPDGEGPVAPGGWHNGPHAPWAPR	4	3933.97	162.163	577	NA	NA	NA	0	0	0	0	1264	51.0175	162.163	22972	42.9768	119.187	6.9245435010447e-10	0	1363
66	34	NA	NA	NA	b3,y2,b4,b5,y4,y5,y5-NH3,y7,y8,y9,y11,b13,y13,b14,y14,b16,b17,y17,b20,b20-NH3,y7(2+),y8(2+),y13(2+),b14(2+),b16(2+),y16(2+),b17(2+),y19(2+),b20(2+),b22(2+),b23(2+),b24(2+),b25(2+),y24(2+),b26(2+),y27(2+),	290.149906,322.187361,361.187016,460.255426,522.303451,650.362031,633.335482,876.457381,963.489411,1034.526521,1202.616391,1320.621856,1356.690611,1391.658966,1457.738291,1559.748836,1687.807416,1779.902391,1982.960616,1965.934067,876.457381,963.489411,1356.690611,1391.658966,1559.748836,1651.843811,1687.807416,1947.992261,1982.960616,2137.034836,2234.087596,2305.124706,2376.161816,2457.204421,24…	6969	0	42.88	AFAAVPTSHPPEDAPAQPPTPGPAASPEQLSFR	4	3338.64	165.725	577	NA	NA	NA	0	0	0	0	1481	51.7056	165.725	13938	48.3632	117.362	8.45399706925341e-10	0	1390
43	24	0.000230,0.993180,0.006547,0.000043,	NA	NA	y3,y3-NH3,b4,y4,y5,y6,y8,b10,y9,y10,b13,y12,b14,b14-NH3,b15,b9(2+),y8(2+),b12(2+),y15(2+),b16(2+),y16(2+),b17(2+),y17(2+),y18(2+),b19(2+),y19(2+),y20(2+),b21(2+),	359.240121,342.213572,455.286396,488.282711,587.351121,658.388231,924.489731,1059.580889,1061.548641,1212.573174,1316.682049,1318.649801,1453.740959,1436.714410,1590.799869,909.540366,924.489731,1165.657516,1652.811494,1719.842459,1751.879904,1790.879569,1808.901364,1922.944294,2018.990569,2022.012704,2151.055294,2203.111739,	6610	0	41.55	LLEVNGVALQGAEHHEAVEALR	3	2377.22	129.281	577	Sodium adduct(1)	NA	NA	1	0	0	0	1408	51.486	129.281	13220	57.0031	72.2774	6.42585983482378e-07	2	2070
32	22	NA	NA	NA	b3,y3,b5,b5-H2O,y4,b6,b6-H2O,y5,y5-NH3,b7,b7-H2O,y6,y7,y8,b10,b11,b11-H2O,y10,b12,y11,y11-H2O,b13,y12,b14,y13,y13-H2O,y14,b15,y15,y15-NH3,	282.144826,349.183011,410.203396,392.192832,452.192201,509.271806,491.261242,565.276261,548.249712,566.293266,548.282702,636.313371,735.381781,850.408721,907.415556,1006.483966,988.473402,1076.504071,1077.521076,1133.525531,1115.514966,1190.605136,1232.593941,1293.614326,1303.631051,1285.620486,1360.652511,1380.646356,1457.705271,1440.678722,	5971	0	39.28	PSPGAVGPEDVALCSSR	2	1641.79	146.266	577	NA	NA	NA	0	0	0	0	1021	50.0903	146.266	11942	38.3221	107.944	8.79847784889515e-10	0	1395
22	19	NA	NA	NA	b2,y2,y2-NH3,b3,y3,y4,y4-NH3,y5,b5,y6,y6-H2O,y6-NH3,b6,y7,b7,b7-H2O,b8,b8-H2O,y8,b9,b9-H2O,y9,y9-H2O,b10,b10-H2O,y10,y10-H2O,b11,b11-H2O,y11,y11-H2O,	243.133926,288.203011,271.176462,372.176516,401.287071,502.334751,485.308202,615.418811,630.261696,716.466491,698.455926,699.439942,743.345756,829.550551,844.393436,826.382872,957.477496,939.466932,958.593141,1058.525176,1040.514612,1087.635731,1069.625166,1171.609236,1153.598672,1216.678321,1198.667756,1284.693296,1266.682732,1345.720911,1327.710346,	9862	0	53.62	IEEEELTLTILR	2	1458.8	159.425	577	NA	NA	NA	0	0	0	0	608	47.839	159.425	19724	46.8354	112.59	9.96039232050544e-10	0	1433
44	24	NA	NA	NA	y3,y4,y4-NH3,y5,y5-NH3,y6,y6-NH3,b7,y7,b8,y8,b9,y9,y10,y11,y11-H2O,y11-NH3,y12,y12-H2O,b13,b13-H2O,y13,y13-NH3,b14,y14,y14-H2O,y14-NH3,b15,y15,y15-H2O,y15-NH3,b16,y16,y16-H2O,y16-NH3,y17,y17-H2O,y17-NH3,b18,b18-H2O,y18,y18-H2O,y18-NH3,	346.183341,417.220451,400.193902,516.288861,499.262312,631.315801,614.289252,720.429026,744.399861,833.513086,843.468271,904.550196,980.527181,1093.611241,1222.653831,1204.643266,1205.627282,1323.701511,1305.690946,1372.747056,1354.736492,1424.749191,1407.722642,1485.831116,1561.808101,1543.797536,1544.781552,1622.890026,1632.845211,1614.834646,1615.818662,1721.958436,1745.929271,1727.918706,1728…	9318	0	51.44	LAVLPPELAHTTELHVLDVAGNR	2	2465.36	126.293	577	NA	NA	NA	0	0	0	0	831	49.196	126.293	18636	22.9559	103.337	1.20876992130822e-09	0	1458
42	18	0.998757,0.001234,0.000008,0.000000,	NA	NA	y3,y4,y4-H2O,y4-NH3,b5,b5-NH3,y5,y5-H2O,b5,y6,y6-NH3,y6,y6-NH3,y7,y7-H2O,b8,y8,b9,y8,y9,y11,b13,b13,b13-NH3,y12,y12-H2O,b14,b14-H2O,b15,b15,y15,b16,b16,b16-NH3,b18,	359.240121,488.282711,470.272146,471.256162,569.329326,552.302777,587.351121,569.340556,591.311269,658.388231,641.361682,680.370174,663.343625,787.430821,769.420256,818.438249,924.489731,931.522309,946.471674,1061.548641,1261.628341,1294.700106,1316.682049,1299.655500,1318.649801,1300.639236,1453.740959,1435.730395,1568.817926,1590.799869,1630.829551,1697.860516,1719.842459,1702.815910,1889.94797…	6517	0	41.22	LLEVNGVALQGAEHHEAVEALR	2	2377.22	74.8486	577	Sodium adduct(1)	NA	NA	1	0	0	0	1394	51.4426	74.8486	13034	34.1926	40.656	0.00501204	17	3607
47	29	NA	NA	NA	y2,b3,b3-H2O,y3,y3-NH3,y4,y4-NH3,b5,b5-H2O,y5,y6,y6-NH3,b7,b7-H2O,y7,b8,y8,b9,y10,y10-NH3,y11,y11-H2O,y11-NH3,b13,b16,b16-H2O,b16-NH3,b17,b17-NH3,b19,b15(2+),y16(2+),b17(2+),y17(2+),b18(2+),b19(2+),y19(2+),b20(2+),b21(2+),y21(2+),b22(2+),	232.140411,330.165956,312.155392,345.224471,328.197922,458.308531,441.281982,514.250746,496.240182,557.376941,670.461001,653.434452,698.335536,680.324972,741.498111,795.388296,840.566521,852.409756,1026.630571,1009.604022,1141.657511,1123.646946,1124.630962,1335.606276,1636.697266,1618.686702,1619.670717,1735.765676,1718.739127,1919.886846,1507.654676,1681.875491,1735.765676,1778.928251,1806.8027…	10465	0	56.07	SLEPSPSPGPQEEDGEVALVLLGR	3	2476.26	171.341	577	NA	NA	NA	0	0	0	0	1501	51.7638	171.341	20930	57.8879	113.453	1.83448595486382e-09	0	1469
44	33	0.999957,0.000043,	NA	NA	y2,y2-NH3,b3,b3-H2O,b3,y3,b4,y4,y4-NH3,y5,y6,y7,y8,y9,y10,y10-H2O,b10,b11,y11,y11-H2O,y11-NH3,y12,b12,b13,b13-H2O,b13-NH3,b17,b18,b4(2+),b5(2+),y9(2+),y9(2+),b9(2+),y10(2+),y11(2+),y12(2+),y13(2+),y14(2+),b14(2+),y16(2+),b17(2+),y17(2+),b18(2+),y18(2+),b19(2+),y19(2+),b20(2+),y20(2+),b21(2+),y21(2+),	288.203011,271.176462,356.217986,338.207422,378.199929,401.287071,455.286396,529.345651,512.319102,628.414061,699.451171,828.493761,885.515221,1022.574131,1123.621811,1105.611246,1160.628579,1217.650039,1236.705871,1218.695306,1219.679322,1293.727331,1330.734099,1431.781779,1413.771215,1414.755230,1825.941849,1925.010259,477.268339,591.311269,1022.574131,1044.556074,1047.544519,1123.621811,1236.7…	10713	0	57.23	LLEVNQQSLLGLTHGEAVQLLR	3	2453.35	236.027	577	Sodium adduct(1)	NA	NA	1	0	0	0	825	49.1645	236.027	21426	66.6642	169.363	6.05352186217955e-42	0	75
37	26	NA	NA	NA	b2,y2,y2-H2O,y3,y3-H2O,y4,b5,y5,y5-H2O,b6,b6-H2O,y6,y7,b8,b8-H2O,y8,y9,y9-H2O,b10,b10-NH3,b11,y11,b12,b15,b7(2+),b11(2+),y11(2+),b12(2+),b13(2+),y13(2+),b15(2+),b16(2+),b17(2+),	211.144096,262.150981,244.140416,361.219391,343.208826,476.246331,536.307856,589.330391,571.319826,607.344966,589.334402,718.372981,817.441391,868.456306,850.445742,930.525451,1058.584031,1040.573466,1127.555376,1110.528827,1240.639436,1336.692931,1339.707846,1696.861436,721.387896,1240.639436,1336.692931,1339.707846,1468.750436,1521.772971,1696.861436,1795.929846,1882.961876,	14252	0	75.65	LPPEVANFMQLVELDVSR	3	2057.08	175.514	577	NA	NA	NA	0	0	0	0	1267	51.0278	175.514	28504	48.1575	127.356	3.0070413839728e-09	0	1506
81	37	NA	NA	NA	y5,y6,y6-NH3,b7,y7,b8,b9,b9-H2O,y8,b10,y10,b11,b12,b13,y12,b14,b14-NH3,y13,y14,y14-NH3,b15,b15-NH3,y15,b17,y19,b19,b9(2+),b10(2+),y10(2+),b11(2+),b12(2+),b13(2+),b14(2+),y15(2+),y18(2+),y20(2+),y21(2+),y22(2+),y23(2+),y24(2+),y26(2+),y27(2+),	626.340891,697.378001,680.351452,735.403546,834.436911,834.471956,905.509066,887.498502,931.489671,1018.593126,1102.554061,1131.677186,1259.735766,1316.757226,1425.692281,1447.797716,1430.771167,1482.713741,1539.735201,1522.708652,1575.856296,1558.829747,1636.787961,1787.935996,1960.967701,1974.000046,905.509066,1018.593126,1102.554061,1131.677186,1259.735766,1316.757226,1447.797716,1636.787961,1…	11562	0	61.23	LPQPEAVVALLQGMQPDGEGPVAPGGWHNGPHAPWAPR	4	3933.97	157.541	577	NA	NA	NA	0	0	0	0	1278	51.0653	157.541	23124	37.7693	119.772	3.01599212654825e-09	0	1507
57	29	NA	NA	NA	b3,y2,y3,y4,y4-NH3,y5,y5-H2O,y5-NH3,b6,b6-H2O,b6-NH3,b7,y6,y6-H2O,y7,b9,b10,b10-NH3,b11,b11-H2O,b11-NH3,b13,b13-H2O,y7(2+),b9(2+),b10(2+),b11(2+),b12(2+),b13(2+),y15(2+),b17(2+),y16(2+),y17(2+),b19(2+),y18(2+),b20(2+),b21(2+),b22(2+),b23(2+),	244.129176,288.203011,401.287071,502.334751,485.308202,615.418811,597.408246,598.392262,634.283106,616.272542,617.256557,705.320216,716.466491,698.455926,829.550551,933.406076,1046.490136,1029.463587,1159.574196,1141.563632,1142.547647,1401.700846,1383.690282,829.550551,933.406076,1046.490136,1159.574196,1272.658256,1401.700846,1782.995951,1838.975886,1912.038541,2025.122601,2097.061066,2138.2066…	12974	0	68.22	GVSFDQANNLLIEPARIEEEELTLTILR	4	3183.7	140.57	577	NA	NA	NA	0	1	0	0	950	49.7772	140.57	25948	55.6036	84.9661	3.06987239143048e-09	0	1508
40	27	NA	NA	NA	y2,y2-H2O,y3,y3-H2O,y4,y4-NH3,b5,y5,y5-H2O,b6,b6-H2O,y6,y6-H2O,b7,y7,b8,y8,b9,b10,b10-NH3,b11,b11-NH3,b12,b13,b7(2+),y7(2+),y8(2+),b9(2+),b10(2+),b11(2+),b12(2+),b13(2+),b14(2+),y16(2+),b17(2+),	262.150981,244.140416,361.219391,343.208826,476.246331,459.219782,536.307856,589.330391,571.319826,607.344966,589.334402,718.372981,700.362416,721.387896,817.441391,868.456306,930.525451,999.496796,1127.555376,1110.528827,1240.639436,1223.612887,1339.707846,1468.750436,721.387896,817.441391,930.525451,999.496796,1127.555376,1240.639436,1339.707846,1468.750436,1581.834496,1846.936731,1882.961876,	14023	0	74.21	LPPEVANFMQLVELDVSR	3	2057.08	174.916	577	NA	NA	NA	0	0	0	0	1267	51.0278	174.916	28046	83.6233	91.2927	3.62866754316164e-09	0	1511
45	28	1.000000,0.000000,	NA	NA	y2,y2-NH3,b3,b4,b4-H2O,b4,y4,y4-NH3,b5,y5,y6,y8,b8,y9,y10,y10-H2O,y10-NH3,b10,b11,b11-NH3,y11,y11-H2O,y11-NH3,y12,b12,b12-H2O,b12-NH3,b13,b13-H2O,b13-NH3,b15,b18,b4(2+),y9(2+),y10(2+),y11(2+),y12(2+),b14(2+),y15(2+),b16(2+),y16(2+),b17(2+),y17(2+),b19(2+),y19(2+),b20(2+),y20(2+),	288.203011,271.176462,356.217986,455.286396,437.275832,477.268339,529.345651,512.319102,591.311269,628.414061,699.451171,885.515221,934.460459,1022.574131,1123.621811,1105.611246,1106.595262,1160.628579,1217.650039,1200.623490,1236.705871,1218.695306,1219.679322,1293.727331,1330.734099,1312.723535,1313.707550,1431.781779,1413.771215,1414.755230,1603.880206,1925.010259,477.268339,1022.574131,1123.…	10647	0	56.89	LLEVNQQSLLGLTHGEAVQLLR	3	2453.35	167.062	577	Sodium adduct(1)	NA	NA	1	0	0	0	795	49.0037	167.062	21294	45.9394	121.123	6.02555022229314e-16	0	673
42	19	0.993451,0.006549,	NA	NA	b3,b3,y3,b5,y6,b6,b6-NH3,b7,y8,b8,b11,b11,b12,b12-H2O,b12-NH3,b13,b13-NH3,y14,b14,y15,y15-NH3,b15,b15-H2O,y15,y16,b16,b16-H2O,b16-NH3,y16,b17,y17,y17-H2O,b18,b18-H2O,b18-NH3,	356.217986,378.199929,401.287071,591.311269,699.451171,719.369849,702.343300,847.428429,885.515221,934.460459,1195.668096,1217.650039,1330.734099,1312.723535,1313.707550,1431.781779,1414.755230,1541.877394,1568.840689,1606.927481,1589.900932,1625.862149,1607.851585,1628.909424,1734.986061,1754.904739,1736.894175,1737.878190,1756.968004,1825.941849,1863.044641,1845.034076,1925.010259,1906.999695,1…	10656	0	56.91	LLEVNQQSLLGLTHGEAVQLLR	2	2453.34	83.4376	577	Sodium adduct(1)	NA	NA	1	0	0	0	929	49.6802	83.4376	21312	38.0998	45.3378	0.000257241	7	3028
24	18	1.000000,	NA	NA	b2,y2,b3,y3,y3-NH3,b4,y4,y5,y6,y6-H2O,b6,y7,y7-NH3,b7,b8,y8,y8-NH3,y9,y9-H2O,y9-NH3,b10,y10,y10-H2O,y10-NH3,y11,y11-NH3,b12,	211.144096,288.203011,324.228156,385.255771,368.229222,437.312216,442.277231,539.329991,626.362021,608.351456,631.417736,777.386554,760.360005,782.442269,869.474299,874.439314,857.412765,971.492074,953.481509,954.465525,1023.548519,1084.576134,1066.565569,1067.549585,1197.660194,1180.633645,1233.685339,	8106	0	46.92	LPLLPPESPGPLR	2	1407.8	131.301	577	Sodium adduct(1)	NA	NA	1	0	0	0	531	47.2509	131.301	16212	29.3102	101.991	6.50934023316684e-13	0	994
24	18	1.000000,	NA	NA	b2,b3,y3,b4,y4,b5,y5,y6,y6*,b7,y7,y7-H2O,y7*,b8,b8*,y8,y8-H2O,y8*,b9,y9,y9-H2O,y9*,b10,y10,y10-H2O,y11,b12,b12*,	211.144096,324.228156,385.255771,437.312216,442.277231,534.364976,539.329991,706.328352,608.333082,760.460326,835.370942,817.360377,737.375672,927.458687,829.463417,932.423702,914.413137,834.428432,1024.511447,1029.476462,1011.465897,931.481192,1081.532907,1142.560522,1124.549957,1255.644582,1291.669727,1193.674457,	8812	0	49.46	LPLLPPESPGPLR	2	1465.78	131.301	577	Phosphorylation(1)	NA	NA	1	0	0	0	699	48.4448	131.301	17624	38.3221	92.9791	6.50934023316684e-13	0	995
30	21	NA	NA	NA	y2,y3,b5,b5-H2O,y4,y4-H2O,y4-NH3,y5,y5-NH3,b7,y6,b8,y7,b9,b9-H2O,y8,y8-H2O,b10,b10-H2O,y9,y9-NH3,y10,y10-H2O,y10-NH3,b12,b12-H2O,y11,y11-H2O,y11-NH3,b13,b13-H2O,b13-NH3,y12,b14,b14-H2O,y13,b15,b15-H2O,b15-NH3,	262.150981,375.235041,506.224536,488.213972,522.303451,504.292886,505.276902,635.387511,618.360962,691.340956,692.408971,806.367896,821.451561,921.394836,903.384272,936.478501,918.467936,1050.437426,1032.426862,1051.505441,1034.478892,1108.526901,1090.516336,1091.500352,1220.542946,1202.532382,1236.621861,1218.611296,1219.595312,1367.611356,1349.600792,1350.584807,1399.685191,1480.695416,1462.684…	4969	0	35.68	GSTPYKGDDEGIFISR	2	1741.84	142.362	577	NA	NA	NA	0	1	0	0	1011	50.0475	142.362	9938	51.864	90.4981	5.08657232143402e-09	0	1570
26	20	NA	NA	NA	b2,b2-NH3,b3,b3-NH3,b4,b4-H2O,y4,b5,b5-H2O,b5-NH3,y5,b6,b6-H2O,b6-NH3,b7,y7,y8,y8-H2O,y8-NH3,b9,b9-H2O,b9-NH3,y9,b10,y10,y10-NH3,b11,y11,y11-H2O,b12,y12,y12-NH3,b13,b13-NH3,y13,	243.108786,226.082237,356.192846,339.166297,443.224876,425.214312,459.267401,514.261986,496.251422,497.235437,572.351461,627.346046,609.335482,610.319497,724.398806,798.446811,895.499571,877.489006,878.473022,950.494156,932.483592,933.467607,1008.583631,1063.578216,1079.620741,1062.594192,1120.599676,1166.652771,1148.642206,1234.642606,1279.736831,1262.710282,1347.726666,1330.700117,1407.795411,	8178	0	47.15	NQLSALPPELGNLR	2	1521.84	148.985	577	NA	NA	NA	0	0	0	0	739	48.6864	148.985	16356	38.3221	110.663	6.08728961665424e-09	0	1587
26	20	NA	NA	NA	b2,b3,b3-NH3,b4,b4-H2O,y4,b5,b5-H2O,b5-NH3,y5,b6,b6-H2O,b6-NH3,y6,y6-H2O,b7,y7,y7-H2O,b8,y8,y8-H2O,y8-NH3,b9,b9-NH3,y9,b10,b10-H2O,y10,y11,y11-H2O,b12,y12,b13,	243.108786,356.192846,339.166297,443.224876,425.214312,459.267401,514.261986,496.251422,497.235437,572.351461,627.346046,609.335482,610.319497,701.394051,683.383486,724.398806,798.446811,780.436246,821.451566,895.499571,877.489006,878.473022,950.494156,933.467607,1008.583631,1063.578216,1045.567652,1079.620741,1166.652771,1148.642206,1234.642606,1279.736831,1347.726666,	8369	0	47.85	NQLSALPPELGNLR	2	1521.84	148.985	577	NA	NA	NA	0	0	0	0	743	48.7099	148.985	16738	38.3221	110.663	6.08728961665424e-09	0	1588
26	20	NA	NA	NA	b2,b2-NH3,y2,b3,b3-NH3,b4,y4,b5,b5-H2O,b5-NH3,b6,b6-H2O,b6-NH3,y6,b7,b7-NH3,y7,y8,y8-H2O,y8-NH3,b9,b9-NH3,y9,b10,b10-H2O,y10,b11,y11,y11-H2O,b12,y12,y12-NH3,b13,	243.108786,226.082237,288.203011,356.192846,339.166297,443.224876,459.267401,514.261986,496.251422,497.235437,627.346046,609.335482,610.319497,701.394051,724.398806,707.372257,798.446811,895.499571,877.489006,878.473022,950.494156,933.467607,1008.583631,1063.578216,1045.567652,1079.620741,1120.599676,1166.652771,1148.642206,1234.642606,1279.736831,1262.710282,1347.726666,	8568	0	48.54	NQLSALPPELGNLR	2	1521.84	148.985	577	NA	NA	NA	0	0	0	0	750	48.7506	148.985	17136	51.4301	97.5546	6.08728961665424e-09	0	1590
26	20	NA	NA	NA	y2,y2-NH3,b3,y3,b4,y4,y4-NH3,b5,y5,y5-NH3,b6,y6,y6-NH3,b7,b7-H2O,b7-NH3,y7,b8,b8-NH3,y8,b9,b9-NH3,y9,y9-NH3,b10,b10-H2O,b10-NH3,y10,y10-NH3,y11,y11-H2O,b12,b12-NH3,b13,b13-H2O,b13-NH3,	288.203011,271.176462,371.207756,419.243501,484.291816,516.296261,499.269712,555.328926,644.354841,627.328292,684.371516,715.391951,698.365402,798.414446,780.403882,781.387897,843.450531,926.473026,909.446477,957.493461,997.510136,980.483587,1086.536051,1069.509502,1125.568716,1107.558152,1108.542167,1157.573161,1140.546612,1270.657221,1252.646656,1353.661966,1336.635417,1466.746026,1448.735462,1…	8734	0	49.15	ALWLAENQAQPMLR	2	1640.86	148.985	577	NA	NA	NA	0	0	0	0	982	49.9211	148.985	17468	39.3241	109.661	6.08728961665424e-09	0	1592
26	20	NA	NA	NA	y2,b3,b4,b4-H2O,y4,b5,y5,b6,y6,y7,b7,b8,b8-H2O,y8,y9,y9-H2O,b10,b10-NH3,y10,b11,y11,y11-NH3,b12,b12-NH3,y12,b13,b13-NH3,	262.150981,314.171036,427.255096,409.244532,472.287801,498.292206,586.330731,613.319146,643.352191,730.384221,760.387556,847.419586,829.409022,877.452631,992.479571,974.469006,1018.483976,1001.457427,1063.516681,1115.536736,1176.600741,1159.574192,1228.620796,1211.594247,1305.643331,1315.652826,1298.626277,	8913	0	49.83	ALEIADFSGNPLSR	2	1489.77	148.985	577	NA	NA	NA	0	0	0	0	887	49.4792	148.985	17826	42.8348	106.15	6.08728961665424e-09	0	1594
26	20	NA	NA	NA	b2,b3,b3-H2O,b3-NH3,y3,y3-NH3,b4,b4-H2O,b4-NH3,y4,y5,y6,b7,b7-H2O,y7,y7-H2O,b8,b8-H2O,b8-NH3,y8,b9,b9-H2O,y9,y9-NH3,b10,b10-NH3,y10,y10-H2O,y10-NH3,b11,y11,b12,b12-NH3,y12,y12-H2O,y12-NH3,b13,	242.149916,329.181946,311.171382,312.155397,374.239791,357.213242,442.266006,424.255442,425.239457,487.323851,624.382761,725.430441,757.424286,739.413722,838.514501,820.503936,870.508346,852.497782,853.481797,909.551611,971.556026,953.545462,1056.620021,1039.593472,1108.614936,1091.588387,1153.672781,1135.662216,1136.646232,1221.698996,1266.756841,1335.741926,1318.715377,1353.788871,1335.778306,1…	9781	0	53.31	LQSLPFALTHLNLK	2	1594.93	148.985	577	NA	NA	NA	0	0	0	0	410	46.1278	148.985	19562	42.2287	106.756	6.08728961665424e-09	0	1596
54	28	NA	NA	NA	b4,b4-H2O,y4,b5,b5-H2O,y5,b6,b6-H2O,b6-NH3,b7,b7-H2O,b7-NH3,y6,y7,y8,y8-H2O,y9,y9-H2O,y9-NH3,b11,b11-NH3,y10,b12,b12-NH3,b13,b13-NH3,y12,y13(2+),y15(2+),b17(2+),y16(2+),y17(2+),y18(2+),y19(2+),y20(2+),y21(2+),y22(2+),y23(2+),y24(2+),y26(2+),	391.197586,373.187022,502.334751,506.224526,488.213962,615.418811,634.283106,616.272542,617.256557,705.320216,687.309652,688.293667,716.466491,829.550551,958.593141,940.582576,1087.635731,1069.625166,1070.609182,1159.574196,1142.547647,1216.678321,1272.658256,1255.631707,1401.700846,1384.674297,1458.804971,1614.906081,1782.995951,1838.975886,1912.038541,2025.122601,2138.206661,2251.290721,2365.33…	13126	0	69.14	GVSFDQANNLLIEPARIEEEELTLTILR	3	3183.7	138.709	577	NA	NA	NA	0	1	0	0	933	49.6988	138.709	26252	47.5704	91.1389	6.25802386580831e-09	0	1606
54	28	NA	NA	NA	b4,y3,y4,y4-H2O,b6,b6-H2O,b6-NH3,b7,b7-H2O,y6,y7,b9,y8,b10,b10-NH3,b11,b11-NH3,b12,b12-H2O,b13,b13-H2O,b13-NH3,y12,b9(2+),y13(2+),y15(2+),y16(2+),y18(2+),y19(2+),y20(2+),b22(2+),y21(2+),y22(2+),y23(2+),y24(2+),y25(2+),y26(2+),	391.197586,401.287071,502.334751,484.324186,634.283106,616.272542,617.256557,705.320216,687.309652,716.466491,829.550551,933.406076,958.593141,1046.490136,1029.463587,1159.574196,1142.547647,1272.658256,1254.647692,1401.700846,1383.690282,1384.674297,1458.804971,933.406076,1614.906081,1782.995951,1912.038541,2138.206661,2251.290721,2365.333651,2468.230306,2479.376581,2550.413691,2678.472271,2793.…	14969	0	80.71	GVSFDQANNLLIEPARIEEEELTLTILR	3	3183.7	138.709	577	NA	NA	NA	0	1	0	0	948	49.7681	138.709	29938	33.5264	105.183	6.25802386580831e-09	0	1607
28	20	1.000000,	NA	NA	y1,b2,y2,b3,y3,b4,y4,y5,y6,b8,b8-H2O,y10,y5(2+),y6(2+),y7(2+),b8(2+),y9(2+),b10(2+),y10(2+),y11(2+),y12(2+),	175.118951,211.144096,288.203011,324.228156,385.255771,437.312216,442.277231,539.329991,626.362021,869.474299,851.463735,1084.576134,539.329991,626.362021,777.386554,869.474299,971.492074,1023.548519,1084.576134,1197.660194,1294.712954,	8081	0	46.81	LPLLPPESPGPLR	3	1407.8	138.549	577	Sodium adduct(1)	NA	NA	1	0	0	0	540	47.3239	138.549	16162	70.6697	67.8795	2.09860783521679e-07	1	1910
26	19	1.000000,	NA	NA	b2,b3,y3,b4,b5,y5,y6,b6,b7,b8,b8-H2O,y5(2+),y6(2+),b7(2+),y9(2+),b10(2+),y10(2+),y11(2+),b12(2+),y12(2+),	211.144096,324.228156,385.255771,437.312216,534.364976,539.329991,626.362021,631.417736,782.442269,869.474299,851.463735,539.329991,626.362021,782.442269,971.492074,1023.548519,1084.576134,1197.660194,1233.685339,1294.712954,	8163	0	47.12	LPLLPPESPGPLR	3	1407.8	134.851	577	Sodium adduct(1)	NA	NA	1	0	0	0	533	47.2673	134.851	16326	42.8348	92.0163	1.11436045205527e-06	2	2171
27	18	1.000000,	NA	NA	y1,y1-NH3,b3,y3,b4,b5,y5,y6,b7,y7,b8,b8*,y8,b10,b10-H2O,b10*,y5(2+),y6(2+),b7(2+),y9(2+),y11(2+),y12(2+),	175.118951,158.092402,324.228156,385.255771,437.312216,534.364976,539.329991,706.328352,760.460326,835.370942,927.458687,829.463417,932.423702,1081.532907,1063.522343,983.537637,539.329991,706.328352,760.460326,1029.476462,1255.644582,1352.697342,	8827	0	49.5	LPLLPPESPGPLR	3	1465.78	117.177	577	Phosphorylation(1)	NA	NA	1	0	0	0	663	48.2151	117.177	17654	60.7087	56.468	0.00105595	10	3275
24	15	1.000000,	NA	NA	b2,b3,y3,b4,b5,y5,y6,y6-H2O,b7,b8,y8,y8-NH3,y9,y9-H2O,y9-NH3,b10,y10,y10-NH3,y11,y11-NH3,b12,b12-H2O,	211.144096,324.228156,385.255771,437.312216,534.364976,539.329991,626.362021,608.351456,782.442269,869.474299,874.439314,857.412765,971.492074,953.481509,954.465525,1023.548519,1084.576134,1067.549585,1197.660194,1180.633645,1233.685339,1215.674775,	8204	0	47.26	LPLLPPESPGPLR	2	1407.8	92.6765	577	Sodium adduct(1)	NA	NA	1	0	0	0	528	47.2263	92.6765	16408	42.2287	50.4478	0.00191356	11	3416
24	15	1.000000,	NA	NA	b2,b3,b4,b5,y5,y5-NH3,y6,y6-NH3,b7,y7,y7-H2O,b8,b8*,y8,y8-H2O,y9,y9-H2O,y9-NH3,y9*,b10,y10,y10-H2O,y11,b12,b12*,	211.144096,324.228156,437.312216,534.364976,539.329991,522.303442,706.328352,689.301803,760.460326,835.370942,817.360377,927.458687,829.463417,932.423702,914.413137,1029.476462,1011.465897,1012.449913,931.481192,1081.532907,1142.560522,1124.549957,1255.644582,1291.669727,1193.674457,	8726	0	49.13	LPLLPPESPGPLR	2	1465.78	92.6765	577	Phosphorylation(1)	NA	NA	1	0	0	0	708	48.5003	92.6765	17452	34.9314	57.7452	0.00191356	11	3417
37	34	1.000000,	NA	NA	y2,y2-NH3,y3,b4,b4,y4,b5,y5,y5-H2O,y5-NH3,b6,b6-H2O,y6,b7,y7,y7-H2O,y7-NH3,b8,y8,b9,y9,b10,b10-NH3,y10,b11,b11-NH3,b12,b12-NH3,b13,y5(2+),b7(2+),y7(2+),b9(2+),b10(2+),b11(2+),b12(2+),y12(2+),b13(2+),b14(2+),b15(2+),b16(2+),y16(2+),b17(2+),	262.150981,245.124432,361.219391,437.239446,437.239446,476.246331,536.307856,589.330391,571.319826,572.303842,607.344966,589.334402,718.372981,721.387896,817.441391,799.430826,800.414842,868.456306,930.525451,1015.491711,1058.584031,1143.550291,1126.523742,1205.619436,1256.634351,1239.607802,1355.702761,1338.676212,1484.745351,589.330391,721.387896,817.441391,1015.491711,1143.550291,1256.634351,1…	11878	0	62.68	LPPEVANFMQLVELDVSR	3	2073.07	302.427	577	Met_OX(1)	NA	NA	1	0	0	0	1267	51.0278	302.427	23756	81.1635	221.264	6.16313716861701e-77	0	13
34	27	1.000000,	NA	NA	y3,b4,y4,b5,y5,b6,b6-H2O,y6,y6-H2O,y6-NH3,b7,b7-NH3,y7,b8,b8-NH3,y8,b9,b9-H2O,y9,b10,b10-NH3,y10,y10-NH3,b11,y11,b12,y12,b13,b13-H2O,b13-NH3,y13,b14,y14,b15,b16,y16,y16-NH3,b17,	361.219391,437.239446,476.246331,536.307856,589.330391,607.344966,589.334402,718.372981,700.362416,701.346432,721.387896,704.361347,817.441391,868.456306,851.429757,930.525451,1015.491711,997.481147,1058.584031,1143.550291,1126.523742,1205.619436,1188.592887,1256.634351,1352.687846,1355.702761,1466.730776,1484.745351,1466.734787,1467.718802,1537.767886,1597.829411,1636.836296,1712.856351,1811.924…	11688	0	61.82	LPPEVANFMQLVELDVSR	2	2073.07	205.774	577	Met_OX(1)	NA	NA	1	0	0	0	1288	51.0992	205.774	23376	44.8204	160.953	6.99887283522016e-51	0	45
56	24	NA	NA	NA	b5,b5-H2O,y5,b6,b6-H2O,y6,y7,y7-H2O,b8,b8-H2O,b9,b9-H2O,y9,b10,y10,y11,y11-NH3,y12,y12-NH3,b13,b13-H2O,b14,b14-H2O,y13,b15,b16,y15,y15-H2O,b17,y17,b18,b18-H2O,y18,b19,y19,y19-H2O,	482.260906,464.250342,517.272881,569.292936,551.282372,604.304911,705.352591,687.342026,737.382806,719.372242,834.435566,816.425002,930.463931,935.483246,987.485391,1100.569451,1083.542902,1215.596391,1198.569842,1216.620796,1198.610232,1317.668476,1299.657912,1344.638981,1414.721236,1513.789646,1540.760151,1522.749586,1642.832236,1738.860591,1757.859176,1739.848612,1825.892621,1870.943236,1922.9…	5892	0	38.99	LAEAPSPAPTPSPTPVEDLGPQTSTSPGR	2	2857.42	97.5941	577	NA	NA	NA	0	0	0	0	1624	52.1059	97.5941	11784	19.5566	78.0375	8.28502266787737e-09	0	1623
24	21	NA	NA	NA	y1,b2,y2,b3,y3,y3-NH3,y4,y5,b5,y6,y6-H2O,y6-NH3,b6,b6-H2O,y7,y7-H2O,y7-NH3,b7,b7-H2O,b8,b8-H2O,y8,b9,b9-H2O,y5(2+),y6(2+),b6(2+),b7(2+),b9(2+),b10(2+),	175.118951,243.133926,288.203011,372.176516,401.287071,384.260522,502.334751,615.418811,630.261696,716.466491,698.455926,699.439942,743.345756,725.335192,829.550551,811.539986,812.524002,844.393436,826.382872,957.477496,939.466932,958.593141,1058.525176,1040.514612,615.418811,716.466491,743.345756,844.393436,1058.525176,1171.609236,	9653	0	52.78	IEEEELTLTILR	3	1458.8	178.245	577	NA	NA	NA	0	0	0	0	617	47.9029	178.245	19306	56.0143	122.23	8.46917087570157e-09	0	1624
18	17	NA	NA	NA	y1,b2,y2,b3,y3,b4,b5,b5-NH3,y4,y5,y6,b7,b7-NH3,b7,b7-NH3,y7,y7-NH3,b8,b8-NH3,y8,y8-H2O,y8-NH3,b9,b9-H2O,y9,y9-NH3,	175.118951,227.175396,274.187361,298.212506,389.214301,397.280916,511.323846,494.297297,517.272881,574.294341,688.337271,696.403886,679.377337,696.403886,679.377337,787.405681,770.379132,811.430826,794.404277,858.442791,840.432226,841.416242,910.499236,892.488672,971.526851,954.500302,	3918	0	32.02	ILAVNGQDVR	2	1084.61	157.878	577	NA	NA	NA	0	0	0	0	423	46.2634	157.878	7836	42.1236	115.755	8.74209995063125e-09	0	1634
18	17	NA	NA	NA	b2,y1,b3,y2,y2-NH3,b4,b4-H2O,y3,y3-NH3,b5,b5-H2O,y4,b6,b6-NH3,y5,b7,b7-H2O,b7-NH3,y6,y6-NH3,b8,b8-NH3,y7,y7-H2O,y7-NH3,b9,b9-H2O,b9-NH3,y8,y8-H2O,y9,y9-H2O,y9-NH3,	171.112796,175.118951,284.196856,303.177531,286.150982,371.228886,353.218322,416.261591,399.235042,486.255826,468.245262,545.304181,600.298756,583.272207,659.347111,729.341346,711.330782,712.314797,774.374051,757.347502,842.425406,825.398857,861.406081,843.395516,844.379532,970.483986,952.473422,953.457437,974.490141,956.479576,1031.511601,1013.501036,1014.485052,	4274	0	33.23	LGLSDNEIQR	2	1144.6	157.878	577	NA	NA	NA	0	0	0	0	530	47.2428	157.878	8548	52.2736	105.605	8.74209995063125e-09	0	1636
18	17	NA	NA	NA	b2,y1,y2,y2-H2O,y2-NH3,b3,y3,b4,b4-H2O,b5,b5-H2O,y4,b6,b6-H2O,y5,y6,y6-NH3,b7,b7-H2O,y7,b8,b8-H2O,b9,b9-H2O,y8,y9,	173.055676,175.118951,262.150981,244.140416,245.124432,288.082616,375.235041,417.125206,399.114642,474.146666,456.136102,522.303451,587.230726,569.220162,635.387511,692.408971,675.382422,734.299136,716.288572,821.451561,847.383196,829.372632,934.415226,916.404662,936.478501,1051.505441,	5432	0	37.33	GDDEGIFISR	2	1108.53	157.878	577	NA	NA	NA	0	0	0	0	462	46.6464	157.878	10864	42.1236	115.755	8.74209995063125e-09	0	1643
18	17	NA	NA	NA	y1,b2,y2,y2-NH3,b4,b4-H2O,b4,b4-H2O,y3,y3-H2O,y4,b5,b5-H2O,y5,b6,b6-H2O,b7,b7-H2O,y6,y7,b8,b8-H2O,y8,y8-H2O,b9,y9,y9-H2O,	175.118951,201.123366,288.203011,271.176462,413.203066,395.192502,413.203066,395.192502,417.245601,399.235036,546.288191,560.271476,542.260912,617.325301,631.308586,613.298022,760.351176,742.340612,764.393711,879.420651,889.393766,871.383202,976.473411,958.462846,1002.477826,1063.505441,1045.494876,	7022	0	43.07	LSPDFAEELR	2	1176.59	157.878	577	NA	NA	NA	0	0	0	0	584	47.6641	157.878	14044	52.2736	105.605	8.74209995063125e-09	0	1649
30	21	NA	NA	NA	y2,y3,y3-NH3,y4,y4-H2O,y4-NH3,b5,b5-H2O,y5,y6,y6-H2O,b7,b7-H2O,b7-NH3,y7,y7-NH3,y8,b9,b9-H2O,b9-NH3,y9,b10,b10-H2O,b10-NH3,y10,b11,b11-H2O,b11-NH3,y11,y11-NH3,b12,b12-H2O,b12-NH3,y12,b13,b13-H2O,b13-NH3,b14,y13,b15,	246.156061,343.208821,326.182272,472.251411,454.240846,455.224862,506.224526,488.213962,585.335471,698.419531,680.408966,705.320216,687.309652,688.293667,811.503591,794.477042,925.546521,933.406076,915.395512,916.379527,1039.589451,1046.490136,1028.479572,1029.463587,1110.626561,1159.574196,1141.563632,1142.547647,1238.685141,1221.658592,1272.658256,1254.647692,1255.631707,1353.712081,1401.700846…	8045	0	46.7	GVSFDQANNLLIEPAR	2	1743.9	142.362	577	NA	NA	NA	0	0	0	0	1025	50.1072	142.362	16090	48.1575	94.2046	8.82090529423934e-09	0	1661
29	23	NA	NA	NA	y1,y1-NH3,b2,y2,b3,b4,y4,y4-NH3,b5,y5,y5-NH3,b6,y6,b8,b9,b9-NH3,b12,y4(2+),y5(2+),b8(2+),y8(2+),b9(2+),b10(2+),y10(2+),y11(2+),y12(2+),b13(2+),	175.118951,158.092402,185.128446,288.203011,371.207756,484.291816,516.296261,499.269712,555.328926,644.354841,627.328292,684.371516,715.391951,926.473026,997.510136,980.483587,1353.661966,516.296261,644.354841,926.473026,957.493461,997.510136,1125.568716,1157.573161,1270.657221,1456.736531,1466.746026,	8606	0	48.71	ALWLAENQAQPMLR	3	1640.86	175.857	577	NA	NA	NA	0	0	0	0	950	49.7772	175.857	17212	78.1783	97.6784	9.39246566603186e-09	0	1677
45	28	NA	NA	NA	b2,y2,b3,y3,b4,b4-H2O,y4,y4-NH3,b5,y5,b7,y8,y8-H2O,y8-NH3,b8,b8-H2O,b8-NH3,b9,b9-H2O,b9-NH3,b10,y11,b6(2+),y6(2+),b7(2+),b8(2+),y9(2+),b9(2+),b10(2+),y11(2+),y12(2+),y13(2+),y14(2+),y15(2+),y16(2+),b17(2+),	227.175396,288.203011,356.217986,401.287071,455.286396,437.275832,529.345651,512.319102,569.329326,628.414061,825.446486,885.515221,867.504656,868.488672,912.478516,894.467952,895.451967,1025.562576,1007.552012,1008.536027,1138.646636,1236.705871,697.387906,699.451171,825.446486,912.478516,1022.574131,1025.562576,1138.646636,1236.705871,1293.727331,1406.811391,1519.895451,1606.927481,1734.986061,…	10679	0	57.06	LLEVNQQSLLGLTHGEAVQLLR	4	2431.37	167.062	577	NA	NA	NA	0	0	0	0	599	47.7743	167.062	21358	41.8239	125.238	1.2416565123329e-08	0	1688
45	28	NA	NA	NA	y2,b3,b4,y4,y5,b6,y6,y8,y8-NH3,b8,y9,y10,y10-H2O,b10,b11,y11,y11-NH3,y12,y13,b13,y10(2+),y11(2+),y12(2+),y13(2+),y14(2+),b15(2+),y16(2+),y17(2+),y18(2+),y19(2+),y20(2+),	288.203011,356.217986,455.286396,529.345651,628.414061,697.387906,699.451171,885.515221,868.488672,912.478516,1022.574131,1123.621811,1105.611246,1138.646636,1195.668096,1236.705871,1219.679322,1293.727331,1406.811391,1409.799836,1123.621811,1236.705871,1293.727331,1406.811391,1519.895451,1603.880206,1734.986061,1863.044641,1977.087571,2076.155981,2205.198571,	12425	0	65.44	LLEVNQQSLLGLTHGEAVQLLR	3	2431.37	167.062	577	NA	NA	NA	0	0	0	0	617	47.9029	167.062	24850	39.0388	128.023	1.2416565123329e-08	0	1689
46	26	NA	NA	NA	b3,b3-H2O,y2,y2-NH3,b4,b4-H2O,y3,b5,b5-NH3,y5,y5-NH3,b6,b6-H2O,b6-NH3,b7,b7-H2O,b7-NH3,b8,b8-H2O,b9,b9-H2O,b9-NH3,b11,y11,y11-NH3,y12,y13,b14,y14,y15,y13(2+),y15(2+),y16(2+),y17(2+),y18(2+),y19(2+),y20(2+),y21(2+),y23(2+),	286.176126,268.165562,303.213911,286.187362,399.260186,381.249622,432.256501,527.318766,510.292217,574.330721,557.304172,674.387176,656.376612,657.360627,787.471236,769.460672,770.444687,916.513826,898.503262,987.550936,969.540372,970.524387,1197.687756,1218.559651,1201.533102,1333.586591,1390.608051,1498.778746,1503.692111,1600.744871,1390.608051,1600.744871,1671.781981,1800.824571,1913.908631,2…	10762	0	57.52	VSVIQFLEAPIGDEDAEEAAAEKR	3	2587.29	141.293	577	NA	NA	NA	0	1	0	0	1482	51.7085	141.293	21524	60.5475	80.7456	1.30393751278256e-08	0	1691
59	29	NA	NA	NA	y3,y5,y5-NH3,b6,y6,y7,y7-H2O,b8,y8,b10,b11,y11,y11,b13,b13-H2O,b13-NH3,y8(2+),b10(2+),y10(2+),b11(2+),b12(2+),y12(2+),y13(2+),y15(2+),b16(2+),b17(2+),y17(2+),b18(2+),y18(2+),b20(2+),b21(2+),b23(2+),b24(2+),	347.228891,573.324241,556.297692,607.344966,686.408301,815.450891,797.440326,868.456306,912.503651,1127.555376,1240.639436,1254.657581,1254.657581,1468.750436,1450.739872,1451.723887,912.503651,1127.555376,1140.614651,1240.639436,1339.707846,1410.758691,1497.790721,1711.886071,1795.929846,1882.961876,1954.012721,2039.062986,2053.081131,2268.132856,2381.216916,2607.312266,2720.396326,	13732	0	72.57	LPPEVANFMQLVELDVSRNDIPEIPESIK	4	3292.72	135.502	577	NA	NA	NA	0	1	0	0	1200	50.7918	135.502	27464	46.7679	88.7338	1.36197943344364e-08	0	1692
42	23	NA	NA	NA	b3,b3-NH3,y3,b4,b4-H2O,b4-NH3,b5,b5-H2O,b5-NH3,y6,b6,b6-NH3,b7,b7-NH3,y7,y8,y9,b9,y10,b10,b10-NH3,y12,y13,y15,y16,y16-H2O,y16-NH3,b17,y17,y18,b18,b19,y19,	365.193176,348.166627,375.235041,494.235766,476.225202,477.209217,565.272876,547.262312,548.246327,674.419541,678.356936,661.330387,775.409696,758.383147,787.503601,858.540711,957.609121,1001.505046,1060.618311,1114.589106,1097.562557,1174.661231,1287.745291,1513.840641,1610.893401,1592.882836,1593.866852,1701.862826,1723.977461,1795.014571,1800.931236,1914.015296,1924.057161,	12226	0	64.37	NHLEALPPEIGGCVALSVLSLR	2	2288.24	121.797	577	NA	NA	NA	0	0	0	0	967	49.8543	121.797	24452	26.5789	95.2178	1.60362441366792e-08	0	1709
34	27	1.000000,	NA	NA	y3,b4,y4,b5,y5,b6,b6-H2O,y6,y6-H2O,y6-NH3,b7,b7-NH3,y7,y7-H2O,b8,b8-NH3,y8,b9,y9,b10,b10-NH3,y10,y10-H2O,b11,b11-NH3,y11,b12,b12-H2O,b12-NH3,y12,y12-NH3,b13,b13-H2O,b13-NH3,y13,y13-NH3,b14,y14,b15,y15,b16,y16,y16-NH3,	361.219391,437.239446,476.246331,536.307856,589.330391,607.344966,589.334402,718.372981,700.362416,701.346432,721.387896,704.361347,817.441391,799.430826,868.456306,851.429757,930.525451,1015.491711,1058.584031,1143.550291,1126.523742,1205.619436,1187.608871,1256.634351,1239.607802,1352.687846,1355.702761,1337.692197,1338.676212,1466.730776,1449.704227,1484.745351,1466.734787,1467.718802,1537.767…	11909	0	62.81	LPPEVANFMQLVELDVSR	2	2073.07	205.774	577	Met_OX(1)	NA	NA	1	0	0	0	1297	51.1294	205.774	23818	37.5911	168.183	6.99887283522016e-51	0	46
55	28	NA	NA	NA	y4,y4-H2O,y5,b7,b7-NH3,y6,y7,y9,y9-H2O,b11,b11-H2O,b11-NH3,y10,b12,b13,y12,b15,y15,b6(2+),b10(2+),y11(2+),b15(2+),y13(2+),y15(2+),y16(2+),y17(2+),y18(2+),y19(2+),b21(2+),y21(2+),y22(2+),y23(2+),y26(2+),	502.334751,484.324186,615.418811,705.320216,688.293667,716.466491,829.550551,1087.635731,1069.625166,1159.574196,1141.563632,1142.547647,1216.678321,1272.658256,1401.700846,1458.804971,1569.790716,1782.995951,634.283106,1046.490136,1345.720911,1569.790716,1614.906081,1782.995951,1912.038541,2025.122601,2138.206661,2251.290721,2355.146246,2479.376581,2550.413691,2678.472271,3027.599651,	15753	0	88.54	GVSFDQANNLLIEPARIEEEELTLTILR	3	3183.69	136.059	577	NA	NA	NA	0	1	0	0	976	49.8945	136.059	31506	33.456	102.603	1.69125479370549e-08	0	1712
44	24	NA	NA	NA	y3,b4,b4-H2O,y4,b5,b5-NH3,b5,b5-NH3,y5,b6,b6-H2O,y6,y6-H2O,y6-NH3,b7,b7-H2O,b7-NH3,y7,b8,b8-H2O,b8-NH3,b9,b9-H2O,y8,b10,b10-H2O,b10-NH3,y9,b11,y10,y10-H2O,y10-NH3,b12,b13,b13-NH3,y12,y12-H2O,y12-NH3,y13,y13-NH3,y15,y15-NH3,b17,b17-NH3,b18,	387.271421,425.177916,407.167352,500.355481,553.236496,536.209947,553.236496,536.209947,587.387511,682.279086,664.268522,700.471571,682.461006,683.445022,753.316196,735.305632,736.289647,829.514161,852.384606,834.374042,835.358057,939.416636,921.406072,942.598221,1010.453746,992.443182,993.427197,1045.607411,1123.537806,1142.660171,1124.649606,1125.633622,1236.621866,1392.722976,1375.696427,1411.…	12774	0	67.17	DATHQEAVSALLRPCLELSLLVR	2	2534.38	126.293	577	NA	NA	NA	0	1	0	0	896	49.5231	126.293	25548	30.068	96.2251	2.23360681756524e-08	0	1720
62	32	NA	NA	NA	b5,b6,y4,y4-NH3,y4,y4-NH3,b7,y7,b9,b9-H2O,b10,b10-H2O,y8,y8-H2O,y11,y11-NH3,b15,y13,b16,b18,y16,y17,y17-NH3,y5(2+),b8(2+),b16(2+),b18(2+),y16(2+),y20(2+),b23(2+),y21(2+),y22(2+),b24(2+),y23(2+),y24(2+),b27(2+),y25(2+),b28(2+),b29(2+),	396.224126,453.245586,494.297301,477.270752,494.297301,477.270752,566.329646,747.439931,766.445736,748.435172,865.514146,847.503582,876.482521,858.471956,1160.630971,1143.604422,1318.674946,1404.752141,1405.706976,1629.797916,1715.875111,1852.934021,1835.907472,593.365711,653.361676,1405.706976,1629.797916,1715.875111,2112.014451,2158.067536,2169.035911,2268.104321,2287.110126,2381.188381,2468.22…	9033	0	50.3	AGGPLGLSIVGGSDHSSHPFGVQEPGVFISK	3	3033.54	156.727	577	NA	NA	NA	0	0	0	0	1463	51.6524	156.727	18066	51.5689	105.159	2.34480089174402e-08	0	1723
24	19	NA	NA	NA	b3,y2,y3,b4,b4-H2O,y4,b5,b5-H2O,y5,y6,b6,y7,b7,b7-H2O,b7-NH3,b8,b8-NH3,y8,y8-H2O,y8-NH3,b9,b9-H2O,y9,y9-H2O,y9-NH3,b10,b10-NH3,b11,b11-H2O,b11-NH3,y10,y10-H2O,y10-NH3,b12,	288.119006,288.203011,401.287071,425.177916,407.167352,472.324181,553.236496,535.225932,559.356211,658.424621,682.279086,729.461731,753.316196,735.305632,736.289647,852.384606,835.358057,858.504321,840.493756,841.477772,939.416636,921.406072,986.562901,968.552336,969.536352,1010.453746,993.427197,1123.537806,1105.527242,1106.511257,1123.621811,1105.611246,1106.595262,1236.621866,	5496	0	37.57	DATHQEAVSALLR	2	1410.73	145.882	577	NA	NA	NA	0	0	0	0	706	48.488	145.882	10992	38.3221	107.56	3.99202875602613e-08	1	1763
34	26	1.000000,	NA	NA	y3,b4,y4,b5,y5,b6,b6-H2O,y6,y6-H2O,b7,b7-NH3,y7,b8,b8-NH3,y8,b9,b9-H2O,y9,b10,b10-H2O,b10-NH3,y10,y11,b12,b12-NH3,y12,b13,b13-H2O,b13-NH3,y13,y13-NH3,b14,y14,b15,y15,y15-NH3,y16,y17,	361.219391,437.239446,476.246331,536.307856,589.330391,607.344966,589.334402,718.372981,700.362416,721.387896,704.361347,817.441391,868.456306,851.429757,930.525451,1015.491711,997.481147,1058.584031,1143.550291,1125.539727,1126.523742,1205.619436,1352.687846,1355.702761,1338.676212,1466.730776,1484.745351,1466.734787,1467.718802,1537.767886,1520.741337,1597.829411,1636.836296,1712.856351,1765.87…	12196	0	64.22	LPPEVANFMQLVELDVSR	2	2073.07	190.926	577	Met_OX(1)	NA	NA	1	0	0	0	1299	51.1361	190.926	24392	39.0388	151.887	5.63522548394001e-42	0	72
38	30	1.000000,	NA	NA	y2,b3,y3,b4,y4,b5,y5,y5-NH3,b6,b6-H2O,y6,y7,y7-H2O,b8,y8,b9,y9,y9-NH3,b10,b10-H2O,b10-NH3,y10,b11,b11-NH3,b12,b13,b7(2+),y8(2+),b9(2+),b10(2+),b11(2+),b12(2+),b13(2+),b14(2+),b15(2+),b16(2+),b17(2+),	262.150981,308.196856,361.219391,437.239446,476.246331,536.307856,589.330391,572.303842,607.344966,589.334402,718.372981,817.441391,799.430826,868.456306,930.525451,1015.491711,1058.584031,1041.557482,1143.550291,1125.539727,1126.523742,1205.619436,1256.634351,1239.607802,1355.702761,1484.745351,721.387896,930.525451,1015.491711,1143.550291,1256.634351,1355.702761,1484.745351,1597.829411,1712.856…	12074	0	63.62	LPPEVANFMQLVELDVSR	3	2073.07	226.641	577	Met_OX(1)	NA	NA	1	0	0	0	1292	51.1126	226.641	24148	51.864	174.777	1.81284137493579e-36	0	103
38	29	1.000000,	NA	NA	y2,y2-H2O,y3,b4,y4,b5,y5,y5-NH3,b6,b6-H2O,y6,y6-H2O,b7,y7,y7-H2O,b8,y8,b9,y9,b10,b10-NH3,b11,b12,b13,b13-NH3,b7(2+),b9(2+),b10(2+),b11(2+),y11(2+),b12(2+),y12(2+),b13(2+),b14(2+),b15(2+),b17(2+),	262.150981,244.140416,361.219391,437.239446,476.246331,536.307856,589.330391,572.303842,607.344966,589.334402,718.372981,700.362416,721.387896,817.441391,799.430826,868.456306,930.525451,1015.491711,1058.584031,1143.550291,1126.523742,1256.634351,1355.702761,1484.745351,1467.718802,721.387896,1015.491711,1143.550291,1256.634351,1352.687846,1355.702761,1466.730776,1484.745351,1597.829411,1712.8563…	11673	0	61.75	LPPEVANFMQLVELDVSR	3	2073.07	211.849	577	Met_OX(1)	NA	NA	1	0	0	0	1265	51.0209	211.849	23346	72.0417	139.808	2.65897726397752e-30	0	165
32	21	NA	NA	NA	y3,b5,b5-H2O,y4,b6,b6-H2O,y5,y5-NH3,b7,b7-H2O,y6,y7,y8,b10,b11,b11-H2O,y10,b12,y11,b13,y12,b14,y13,y14,y15,y16,y16-H2O,y16-NH3,	349.183011,410.203396,392.192832,452.192201,509.271806,491.261242,565.276261,548.249712,566.293266,548.282702,636.313371,735.381781,850.408721,907.415556,1006.483966,988.473402,1076.504071,1077.521076,1133.525531,1190.605136,1232.593941,1293.614326,1303.631051,1360.652511,1457.705271,1544.737301,1526.726736,1527.710752,	5774	0	38.57	PSPGAVGPEDVALCSSR	2	1641.79	133.68	577	NA	NA	NA	0	0	0	0	1019	50.0817	133.68	11548	26.9469	106.733	5.72526333163913e-08	1	1796
47	26	NA	NA	NA	y2,y3,y3-NH3,y4,b5,y5,y6,b7,b8,b10,b10-H2O,b11,b12,y3(2+),b6(2+),b7(2+),b8(2+),b9(2+),b10(2+),b12(2+),y11(2+),b13(2+),y12(2+),y13(2+),y15(2+),b16(2+),b17(2+),b18(2+),	274.187361,387.271421,370.244872,500.355481,553.236496,587.387511,700.471571,753.316196,852.384606,1010.453746,992.443182,1123.537806,1236.621866,387.271421,682.279086,753.316196,852.384606,939.416636,1010.453746,1236.621866,1298.761281,1392.722976,1411.845341,1524.929401,1682.998541,1705.868986,1834.911576,1947.995636,	12743	0	67.02	DATHQEAVSALLRPCLELSLLVR	4	2534.38	138.233	577	NA	NA	NA	0	1	0	0	889	49.489	138.233	25486	39.2927	98.9399	6.03611462135194e-08	1	1810
34	24	1.000000,	NA	NA	y3,b4,y4,b5,y5,b6,b6-H2O,y6,y6-H2O,b7,y7,b8,b8-NH3,b10,y10,b11,y11,b12,y12,b13,b13-H2O,b13-NH3,y13,y13-NH3,b14,y14,y14-NH3,b15,b16,y16,y16-H2O,y16-NH3,y17,	361.219391,437.239446,476.246331,536.307856,589.330391,607.344966,589.334402,718.372981,700.362416,721.387896,817.441391,868.456306,851.429757,1143.550291,1205.619436,1256.634351,1352.687846,1355.702761,1466.730776,1484.745351,1466.734787,1467.718802,1537.767886,1520.741337,1597.829411,1636.836296,1619.809747,1712.856351,1811.924761,1862.931646,1844.921081,1845.905097,1959.984406,	12240	0	64.44	LPPEVANFMQLVELDVSR	2	2073.08	163.203	577	Met_OX(1)	NA	NA	1	0	0	0	1300	51.1394	163.203	24480	44.8204	118.382	1.20717485796632e-27	0	202
57	28	NA	NA	NA	y3,b4,b4-H2O,b5,y5,y5-H2O,b6,y6,b7,b7-NH3,y7,b8,y8,y9,y10,b11,y11,b15,b15-NH3,b16,b7(2+),y13(2+),b14(2+),b20(2+),b21(2+),y21(2+),y22(2+),y23(2+),y24(2+),y25(2+),y26(2+),y27(2+),	347.228891,437.239446,419.228882,536.307856,573.324241,555.313676,607.344966,686.408301,721.387896,704.361347,815.450891,868.456306,912.503651,1025.587711,1140.614651,1240.639436,1254.657581,1696.861436,1679.834887,1795.929846,721.387896,1497.790721,1581.834496,2268.132856,2381.216916,2425.264261,2572.332671,2686.375601,2757.412711,2856.481121,2985.523711,3082.576471,	13791	0	72.88	LPPEVANFMQLVELDVSRNDIPEIPESIK	3	3292.72	130.992	577	NA	NA	NA	0	1	0	0	1199	50.7882	130.992	27582	40.8297	90.1622	7.05480797957844e-08	1	1816
46	24	NA	NA	NA	b4,y4,y5,y5-NH3,y6,b6,y7,y7-NH3,b7,y8,b8,b8-H2O,b8-NH3,y9,y9-NH3,b9,b9-H2O,b9-NH3,y10,y10-NH3,b11,y11,y11-H2O,y11-NH3,y12,y12-H2O,y13,b14,y14,y14-NH3,y15,y15-H2O,y15-NH3,b15,y16,y16-NH3,y17,y17-H2O,y17-NH3,b17,b17-H2O,y18,y18-H2O,	399.260186,503.293611,574.330721,557.304172,645.367831,674.387176,774.410421,757.383872,787.471236,903.453011,916.513826,898.503262,899.487277,974.490121,957.463572,987.550936,969.540372,970.524387,1089.517061,1072.490512,1197.687756,1218.559651,1200.549086,1201.533102,1333.586591,1315.576026,1390.608051,1498.778746,1503.692111,1486.665562,1600.744871,1582.734306,1583.718322,1613.805686,1671.7819…	10801	0	57.71	VSVIQFLEAPIGDEDAEEAAAEKR	2	2587.29	120.653	577	NA	NA	NA	0	1	0	0	1497	51.7522	120.653	21602	28.3276	92.3252	8.2805956665404e-08	1	1846
54	23	NA	NA	NA	y4,y5,y5-H2O,y6,y6-NH3,y7,y7-H2O,y7-NH3,y8,y8-H2O,b8,b8-H2O,y9,b10,y10,b11,y11,y11-H2O,y11-NH3,b12,y12,y12-H2O,y12-NH3,b13,y13,y13-NH3,b14,y14,b15,b15-NH3,y15,y15-H2O,y15-NH3,b16,b16-H2O,b16-NH3,y16,b17,b17-H2O,b17-NH3,y17,	460.251421,547.283451,529.272886,644.336211,627.309662,731.368241,713.357676,714.341692,802.405351,784.394786,813.435236,795.424672,988.484661,999.499286,1085.537421,1128.541876,1182.590181,1164.579616,1165.563632,1257.584466,1310.648761,1292.638196,1293.622212,1385.643046,1439.691351,1422.664802,1514.685636,1554.718291,1629.712576,1612.686027,1683.760881,1665.750316,1666.734332,1758.755166,1740.…	8267	0	47.47	LALDGETLGEEEQEDEQPPWASPSPTSR	2	3068.4	93.1623	577	NA	NA	NA	0	0	0	0	883	49.4596	93.1623	16534	22.0388	71.1235	1.00014614930809e-07	1	1855
57	28	NA	NA	NA	b3,y2,y2-NH3,y3,y4,y5,y5-H2O,y6,y6-H2O,y7,b9,b10,b11,b11-NH3,b12,b13,b13-H2O,b13-NH3,b9(2+),b10(2+),y9(2+),b11(2+),b12(2+),b13(2+),y15(2+),y16(2+),y17(2+),y18(2+),b20(2+),b21(2+),b22(2+),y22(2+),b23(2+),b24(2+),	244.129176,288.203011,271.176462,401.287071,502.334751,615.418811,597.408246,716.466491,698.455926,829.550551,933.406076,1046.490136,1159.574196,1142.547647,1272.658256,1401.700846,1383.690282,1384.674297,933.406076,1046.490136,1087.635731,1159.574196,1272.658256,1401.700846,1782.995951,1912.038541,2025.122601,2138.206661,2226.103656,2355.146246,2468.230306,2550.413691,2569.277986,2682.362046,	13157	0	69.34	GVSFDQANNLLIEPARIEEEELTLTILR	4	3183.69	130.992	577	NA	NA	NA	0	1	0	0	983	49.9255	130.992	26314	41.8695	89.1224	1.05763145274155e-07	1	1860
37	25	NA	NA	NA	y2,y2-NH3,b2,b2-H2O,y3,y3-NH3,y4,b4,y5,y6,y6-NH3,b7,y8,y9,y10,b9,b9-H2O,b10,b10-H2O,b10-NH3,y11,b14,y9(2+),y11(2+),y12(2+),y13(2+),y14(2+),b14(2+),y15(2+),b15(2+),y16(2+),y17(2+),	232.140411,215.113862,243.133926,225.123362,303.177521,286.150972,374.214631,397.208146,503.257221,604.304901,587.278352,739.398466,804.384601,901.437361,958.458821,1062.536686,1044.526122,1119.558146,1101.547582,1102.531597,1144.538131,1517.738286,901.437361,1144.538131,1281.597041,1394.681101,1495.728781,1517.738286,1623.787361,1646.780876,1680.808821,1777.861581,	6320	0	40.53	ELPGQTLHWGPEATEAAGR	3	2019.99	162.586	577	NA	NA	NA	0	0	0	0	1298	51.1327	162.586	12640	49.1598	113.426	1.09899909390522e-07	1	1861
34	23	0.999768,0.000232,0.000000,	NA	NA	y3,y3-H2O,y3-NH3,b4,b4,y4,y4-NH3,y5,y5-NH3,b6,y6,b7,y7,y7,y7-NH3,b8,y8,b9,b10,b10-H2O,b10,b11,b11,y11,b12,b12,b13,y13,b14,y14,y14-H2O,y14-NH3,y14,b15,b15-H2O,b15-NH3,y15,b16,b17,b17-H2O,	361.219391,343.208826,344.192842,437.239446,459.221389,476.246331,459.219782,589.330391,572.303842,629.326909,718.372981,743.369839,817.441391,839.423334,822.396785,890.438249,930.525451,1021.478739,1127.555376,1109.544812,1149.537319,1240.639436,1262.621379,1336.692931,1339.707846,1361.689789,1490.732379,1521.772971,1603.816439,1620.841381,1602.830816,1603.814832,1642.823324,1718.843379,1700.832…	13781	0	72.83	LPPEVANFMQLVELDVSR	2	2079.06	150.243	577	Sodium adduct(1)	NA	NA	1	0	0	0	1331	51.2418	150.243	27562	39.0388	111.204	5.68416683207529e-22	0	358
61	31	NA	NA	NA	y3,y3-H2O,y3-NH3,b5,b5-H2O,y4,b6,y5,b7,y6,b8,y7,b9,y8,y9,b10,y10,b12,y12,b13,b14,y14,b15,b15-H2O,y15,y16,y16-NH3,b17,b17-H2O,b17-NH3,y18,y13(2+),b14(2+),y16(2+),y17(2+),b25(2+),b26(2+),b30(2+),	417.245601,399.235036,400.219052,522.303446,504.292882,530.329661,593.340556,631.377341,706.424616,730.445751,820.467546,843.529811,935.494486,957.572741,1028.609851,1034.562896,1141.693911,1234.678986,1312.758301,1362.737566,1433.774676,1526.853651,1546.858736,1528.848172,1583.875111,1680.927871,1663.901322,1700.932956,1682.922392,1683.906407,1865.049041,1411.826711,1433.774676,1680.927871,1794.…	14196	0	75.3	SLAHLALNDVSLQALPGDVGNLANLVTLELR	3	3226.78	149.585	577	NA	NA	NA	0	0	0	0	598	47.767	149.585	28392	39.8201	109.765	1.85215305777246e-07	1	1903
34	23	1.000000,	NA	NA	y4,b5,b6,y5,y6,y6-H2O,y7,b8,b8-NH3,y8,b9,y9,y9-NH3,b10,y10,b11,b11-H2O,b11-NH3,b12,y11,b13,b13-H2O,b13-NH3,y12,y13,y14,b15,y15,y15-NH3,b16,b16-H2O,b16-NH3,y16,y16-NH3,	504.241246,536.307856,607.344966,617.325306,746.367896,728.357331,845.436306,868.456306,851.429757,958.520366,999.496796,1086.578946,1069.552397,1127.555376,1217.619436,1240.639436,1222.628872,1223.612887,1339.707846,1364.687846,1468.750436,1450.739872,1451.723887,1478.730776,1549.767886,1648.836296,1696.861436,1777.878886,1760.852337,1795.929846,1777.919282,1778.903297,1874.931646,1857.905097,	14040	0	74.29	LPPEVANFMQLVELDVSR	2	2085.08	150.243	577	Formylation(1)	NA	NA	1	0	0	0	1244	50.9482	150.243	28080	30.9182	119.325	5.68416683207529e-22	0	359
22	18	NA	NA	NA	b2,y2,b3,y3,b4,b4-H2O,y4,y4-NH3,y5,b5,b5-H2O,y6,y6-H2O,y7,y7-H2O,b7,b7-H2O,b8,b8-H2O,y8,y8-H2O,b9,b9-H2O,y9,y9-H2O,y10,y10-H2O,y10-NH3,b11,b11-H2O,y11,y11-H2O,y11-NH3,	243.133926,288.203011,372.176516,401.287071,501.219106,483.208542,502.334751,485.308202,615.418811,630.261696,612.251132,716.466491,698.455926,829.550551,811.539986,844.393436,826.382872,957.477496,939.466932,958.593141,940.582576,1058.525176,1040.514612,1087.635731,1069.625166,1216.678321,1198.667756,1199.651772,1284.693296,1266.682732,1345.720911,1327.710346,1328.694362,	9994	0	54.14	IEEEELTLTILR	2	1458.81	143.086	577	NA	NA	NA	0	0	0	0	590	47.7085	143.086	19988	46.8354	96.2506	2.13115515453199e-07	1	1952
22	18	NA	NA	NA	b2,y2,b3,b3-H2O,y3,b4,b4-H2O,y4,y5,b5,y6,y7,y7-H2O,b8,b8-H2O,y8,y8-H2O,b9,b9-H2O,y9,b10,b10-H2O,y10,b11,y11,	243.133926,288.203011,372.176516,354.165952,401.287071,501.219106,483.208542,502.334751,615.418811,630.261696,716.466491,829.550551,811.539986,957.477496,939.466932,958.593141,940.582576,1058.525176,1040.514612,1087.635731,1171.609236,1153.598672,1216.678321,1284.693296,1345.720911,	10277	0	55.25	IEEEELTLTILR	2	1458.81	143.086	577	NA	NA	NA	0	0	0	0	584	47.6641	143.086	20554	46.8354	96.2506	2.13115515453199e-07	1	1954
22	18	NA	NA	NA	b2,y2,b3,y3,b4,b4-H2O,y4,y4-H2O,y4-NH3,y5,b5,y6,y6-NH3,y7,b7,b7-H2O,b8,b8-H2O,y8,y8-H2O,y8-NH3,b9,b9-H2O,y9,b10,y10,b11,b11-H2O,	243.133926,288.203011,372.176516,401.287071,501.219106,483.208542,502.334751,484.324186,485.308202,615.418811,630.261696,716.466491,699.439942,829.550551,844.393436,826.382872,957.477496,939.466932,958.593141,940.582576,941.566592,1058.525176,1040.514612,1087.635731,1171.609236,1216.678321,1284.693296,1266.682732,	12436	0	65.52	IEEEELTLTILR	2	1458.81	143.086	577	NA	NA	NA	0	0	0	0	584	47.6641	143.086	24872	46.8021	96.2839	2.13115515453199e-07	1	1964
54	27	NA	NA	NA	y3,y4,y5,b6,b6-H2O,b6-NH3,b7,b7-NH3,y6,y7,y8,y9,y9-H2O,y9-NH3,b11,b11-NH3,y10,b12,b13,y12,b16,y15,y15-NH3,y14(2+),y15(2+),y16(2+),y17(2+),y18(2+),b20(2+),y19(2+),y21(2+),y22(2+),y25(2+),b27(2+),	401.287071,502.334751,615.418811,634.283106,616.272542,617.256557,705.320216,688.293667,716.466491,829.550551,958.593141,1087.635731,1069.625166,1070.609182,1159.574196,1142.547647,1216.678321,1272.658256,1401.700846,1458.804971,1725.891826,1782.995951,1765.969402,1685.943191,1782.995951,1912.038541,2025.122601,2138.206661,2226.103656,2251.290721,2479.376581,2550.413691,2940.567621,3009.577846,	13422	0	70.95	GVSFDQANNLLIEPARIEEEELTLTILR	3	3183.7	128.973	577	NA	NA	NA	0	1	0	0	966	49.8498	128.973	26844	50.1161	78.857	2.14225864881091e-07	1	1969
54	27	NA	NA	NA	b4,b4-H2O,y4,y5,b7,y6,y7,y8,y9,y9-H2O,b11,b11-NH3,y10,b12,b12-H2O,b12-NH3,y11,b13,b13-NH3,y12,y13(2+),y14(2+),y15(2+),y16(2+),y17(2+),y18(2+),y19(2+),y21(2+),y22(2+),y23(2+),b24(2+),y24(2+),y26(2+),	391.197586,373.187022,502.334751,615.418811,705.320216,716.466491,829.550551,958.593141,1087.635731,1069.625166,1159.574196,1142.547647,1216.678321,1272.658256,1254.647692,1255.631707,1345.720911,1401.700846,1384.674297,1458.804971,1614.906081,1685.943191,1782.995951,1912.038541,2025.122601,2138.206661,2251.290721,2479.376581,2550.413691,2678.472271,2682.362046,2793.499211,3027.599651,	15208	0	82.88	GVSFDQANNLLIEPARIEEEELTLTILR	3	3183.69	128.973	577	NA	NA	NA	0	1	0	0	982	49.9211	128.973	30416	41.8695	87.1035	2.14225864881091e-07	1	1970
54	27	NA	NA	NA	b4,b4-H2O,y4,y5,b7,b7-NH3,y6,y6-H2O,y7,y8,b10,b10-NH3,y9,y9-NH3,y10,b12,b12-H2O,y11,b13,b13-H2O,b13-NH3,b15,b15-NH3,b15,b15-NH3,y15(2+),y16(2+),b18(2+),y17(2+),y19(2+),y20(2+),y21(2+),y22(2+),y23(2+),y24(2+),b26(2+),y25(2+),	391.197586,373.187022,502.334751,615.418811,705.320216,688.293667,716.466491,698.455926,829.550551,958.593141,1046.490136,1029.463587,1087.635731,1070.609182,1216.678321,1272.658256,1254.647692,1345.720911,1401.700846,1383.690282,1384.674297,1569.790716,1552.764167,1569.790716,1552.764167,1782.995951,1912.038541,1968.018476,2025.122601,2251.290721,2365.333651,2479.376581,2550.413691,2678.472271,2…	17271	0	104.45	GVSFDQANNLLIEPARIEEEELTLTILR	3	3183.69	128.973	577	NA	NA	NA	0	1	0	0	967	49.8543	128.973	34542	41.8695	87.1035	2.14225864881091e-07	1	1971
66	32	NA	NA	NA	y2,b4,y3,b5,y4,b6,y5,y7,y8,y9,b13,y13,b14,y14,y14-NH3,b16,y16,b17,b17-NH3,b19,b20,b20-H2O,b20-NH3,y12(2+),y13(2+),b16(2+),y16(2+),b17(2+),y19(2+),b20(2+),y20(2+),b24(2+),y23(2+),y24(2+),y27(2+),y31(2+),	322.187361,361.187016,409.219391,460.255426,522.303451,557.308186,650.362031,876.457381,963.489411,1034.526521,1320.621856,1356.690611,1391.658966,1457.738291,1440.711742,1559.748836,1651.843811,1687.807416,1670.780867,1881.912936,1982.960616,1964.950052,1965.934067,1259.637851,1356.690611,1559.748836,1651.843811,1687.807416,1947.992261,1982.960616,2019.029371,2305.124706,2360.151661,2457.204421,…	6963	0	42.87	AFAAVPTSHPPEDAPAQPPTPGPAASPEQLSFR	3	3338.65	146.578	577	NA	NA	NA	0	0	0	0	1470	51.6732	146.578	13926	35.4497	111.129	2.6455133455666e-07	1	1981
26	21	NA	NA	NA	y1,b2,y2,b3,y3,y3-NH3,b4,y4,y4-NH3,b5,y5,y5-NH3,b6,y6,b8,y4(2+),b5(2+),b6(2+),y8(2+),b9(2+),y9(2+),b10(2+),y10(2+),b11(2+),	175.118951,185.128446,288.203011,371.207756,419.243501,402.216952,484.291816,516.296261,499.269712,555.328926,644.354841,627.328292,684.371516,715.391951,926.473026,516.296261,555.328926,684.371516,957.493461,997.510136,1086.536051,1125.568716,1157.573161,1222.621476,	8574	0	48.56	ALWLAENQAQPMLR	4	1640.86	163.997	577	NA	NA	NA	0	0	0	0	1028	50.1199	163.997	17148	44.7668	119.23	3.08780940217574e-07	1	1990
30	20	NA	NA	NA	y2,y3,b5,b5-H2O,y4,y4-NH3,y5,y5-NH3,b7,y6,b8,b8-H2O,y7,b9,b9-H2O,y8,b10,b10-H2O,y9,y10,y10-H2O,y10-NH3,b12,y11,y11-H2O,y11-NH3,b13,b13-H2O,y12,y12-NH3,b14,b14-H2O,b14-NH3,y13,	262.150981,375.235041,506.224536,488.213972,522.303451,505.276902,635.387511,618.360962,691.340956,692.408971,806.367896,788.357332,821.451561,921.394836,903.384272,936.478501,1050.437426,1032.426862,1051.505441,1108.526901,1090.516336,1091.500352,1220.542946,1236.621861,1218.611296,1219.595312,1367.611356,1349.600792,1399.685191,1382.658642,1480.695416,1462.684852,1463.668867,1496.737951,	5081	0	36.07	GSTPYKGDDEGIFISR	2	1741.84	129.564	577	NA	NA	NA	0	1	0	0	1023	50.0988	129.564	10162	33.426	96.1378	3.13448371739245e-07	1	1993
36	26	1.000000,	NA	NA	y2,y3,b4,y4,b5,y5,y5-NH3,b6,b6-H2O,y6,y6-H2O,y7,y7-H2O,y7-NH3,b8,y8,y8-NH3,b9,y9,b10,b11,b12,b12-H2O,b13,b7(2+),b9(2+),b10(2+),b11(2+),b12(2+),b13(2+),b14(2+),b16(2+),b17(2+),	262.150981,361.219391,437.239446,476.246331,536.307856,589.330391,572.303842,607.344966,589.334402,718.372981,700.362416,817.441391,799.430826,800.414842,868.456306,930.525451,913.498902,1015.491711,1058.584031,1143.550291,1256.634351,1355.702761,1337.692197,1484.745351,721.387896,1015.491711,1143.550291,1256.634351,1355.702761,1484.745351,1597.829411,1811.924761,1898.956791,	12231	0	64.38	LPPEVANFMQLVELDVSR	3	2073.07	180.343	577	Met_OX(1)	NA	NA	1	0	0	0	1236	50.9202	180.343	24462	65.404	114.939	4.7086999466398e-19	0	485
18	16	NA	NA	NA	b1,y2,y2-NH3,b2,b2-NH3,y3,y3-NH3,y4,b4,b4-NH3,b5,y5,y5-NH3,y6,y6-NH3,b6,b6-H2O,b6-NH3,b7,y7,y7-H2O,y8,y8-H2O,y8-NH3,b8,b8-H2O,b8-NH3,y9,y9-H2O,y9-NH3,b9,b9-NH3,	157.108386,260.196861,243.170312,270.192446,253.165897,388.255441,371.228892,445.276901,482.272146,465.245597,539.293606,558.360961,541.334412,615.382421,598.355872,652.377666,634.367102,635.351117,709.399126,730.409361,712.398796,827.462121,809.451556,810.435572,837.457706,819.447142,820.431157,940.546181,922.535616,923.519632,950.541766,933.515217,	4473	0	33.93	RLPDGIGQLK	2	1096.65	139.011	577	NA	NA	NA	0	1	0	0	316	44.9969	139.011	8946	52.2736	86.7379	3.9547693348909e-07	2	2007
42	26	NA	NA	NA	y2,y3,y4,y4-H2O,y4-NH3,y5,y6,y6-H2O,y6-NH3,b6,y7,y8,y9,b9,b10,y11,y12,b12,y15,y17,b5(2+),b11(2+),b13(2+),b14(2+),b15(2+),y16(2+),b16(2+),b19(2+),b20(2+),b21(2+),	288.203011,375.235041,488.319101,470.308536,471.292552,587.387511,674.419541,656.408976,657.392992,678.356936,787.503601,858.540711,957.609121,1001.505046,1114.589106,1117.639771,1174.661231,1228.632026,1513.840641,1723.977461,565.272876,1171.610566,1331.641216,1430.709626,1501.746736,1610.893401,1614.830796,1914.015296,2001.047326,2114.131386,	12640	0	66.49	NHLEALPPEIGGCVALSVLSLR	3	2288.25	154.813	577	NA	NA	NA	0	0	0	0	944	49.7497	154.813	25280	62.2711	92.542	4.30937614450687e-07	2	2013
30	20	NA	NA	NA	b3,b3-H2O,b3-NH3,y3,b4,b4-H2O,b4-NH3,b5,b5-H2O,b5-NH3,y5,y6,y7,y8,y9,y10,b10,b11,b11-H2O,b11-NH3,y11,b12,y12,b13,b13-NH3,y13,y14,b15,b15-H2O,y15,y15-H2O,y15-NH3,	313.150646,295.140082,296.124097,371.240121,384.187756,366.177192,367.161207,471.219786,453.209222,454.193237,499.298691,556.320151,613.341611,726.425671,823.478431,920.531191,932.483586,989.505046,971.494482,972.478497,1017.583951,1046.526506,1104.615981,1117.563616,1100.537067,1175.653091,1272.705851,1313.684786,1295.674222,1359.737881,1341.727316,1342.711332,	4031	0	32.4	QSPASPPPLGGGAPVR	2	1487.8	129.564	577	NA	NA	NA	0	0	0	0	659	48.1889	129.564	8062	29.3102	100.254	4.9483723517542e-07	2	2019
58	30	NA	NA	NA	y3,b4,y4,y5,y5-H2O,y5-NH3,b6,y6,b7,y7,y7-H2O,b8,y8,y9,b10,y10,b12,b12-H2O,b14,b16,y15,b17,b18,b18-H2O,b19,b20,y7(2+),y8(2+),y9(2+),y15(2+),y17(2+),b20(2+),b21(2+),b23(2+),b26(2+),	329.193171,385.208146,416.225201,517.272881,499.262316,500.246332,569.292936,604.304911,666.345696,705.352591,687.342026,737.382806,833.411171,930.463931,935.483246,987.485391,1119.568036,1101.557472,1317.668476,1513.789646,1540.760151,1642.832236,1757.859176,1739.848612,1870.943236,1927.964696,705.352591,833.411171,930.463931,1540.760151,1738.860591,1927.964696,2025.017456,2254.123716,2529.23545…	5777	0	38.58	LAEAPSPAPTPSPTPVEDLGPQTSTSPGR	3	2857.41	147.723	577	NA	NA	NA	0	0	0	0	1585	52.0003	147.723	11554	57.0031	90.7194	5.06803071716728e-07	2	2027
37	26	1.000000,	NA	NA	y2,b3,y3,y4,y4-H2O,b5,y5,y5-NH3,y6,b7,y7,y7-H2O,b8,y8,b9,b10,b11,b12,b13,b7(2+),b9(2+),b10(2+),b11(2+),b12(2+),b13(2+),b14(2+),b16(2+),b17(2+),y17(2+),	262.150981,308.196856,361.219391,476.246331,458.235766,536.307856,589.330391,572.303842,718.372981,721.387896,817.441391,799.430826,868.456306,930.525451,1015.491711,1143.550291,1256.634351,1355.702761,1484.745351,721.387896,1015.491711,1143.550291,1256.634351,1355.702761,1484.745351,1597.829411,1811.924761,1898.956791,1959.984406,	12156	0	64.03	LPPEVANFMQLVELDVSR	3	2073.07	175.514	577	Met_OX(1)	NA	NA	1	0	0	0	1292	51.1126	175.514	24312	50.8344	124.679	1.47925083941054e-17	0	575
39	25	0.837457,0.157023,0.005520,	NA	NA	b2,y2,b3,y3,b4,y4,b5,b5-H2O,y5,b6,b6-H2O,y6,y7,b8,y8,y8,y8-NH3,b9,y9,b10,b10,b11,b12,b7(2+),b7(2+),y7(2+),b9(2+),b10(2+),b11(2+),b12(2+),b13(2+),y13(2+),b14(2+),y14(2+),y15(2+),y16(2+),y17(2+),	211.144096,262.150981,308.196856,361.219391,437.239446,476.246331,536.307856,518.297292,589.330391,607.344966,589.334402,718.372981,817.441391,868.456306,930.525451,952.507394,935.480845,1021.478739,1058.584031,1127.555376,1149.537319,1262.621379,1361.689789,721.387896,743.369839,817.441391,1021.478739,1149.537319,1262.621379,1361.689789,1490.732379,1543.754914,1603.816439,1642.823324,1771.865914…	13857	0	73.34	LPPEVANFMQLVELDVSR	3	2079.06	154.355	577	Sodium adduct(1)	NA	NA	1	0	0	0	1326	51.2254	154.355	27714	47.5611	106.794	1.04461995058501e-11	0	1138
26	19	NA	NA	NA	b2,b3,b3-NH3,b4,y4,b5,b5-H2O,b5-NH3,y5,b6,b6-H2O,b6-NH3,b7,b7-H2O,y7,y8,y8-H2O,y8-NH3,b9,b9-NH3,y9,y9-NH3,b10,y10,b11,y11,y11-H2O,b12,b12-H2O,y12,y12-H2O,y12-NH3,b13,b13-H2O,b13-NH3,	243.108786,356.192846,339.166297,443.224876,459.267401,514.261986,496.251422,497.235437,572.351461,627.346046,609.335482,610.319497,724.398806,706.388242,798.446811,895.499571,877.489006,878.473022,950.494156,933.467607,1008.583631,991.557082,1063.578216,1079.620741,1120.599676,1166.652771,1148.642206,1234.642606,1216.632042,1279.736831,1261.726266,1262.710282,1347.726666,1329.716102,1330.700117,	8263	0	47.46	NQLSALPPELGNLR	2	1521.84	134.851	577	NA	NA	NA	0	0	0	0	749	48.7448	134.851	16526	51.4564	83.3947	5.38032718243888e-07	2	2046
26	19	NA	NA	NA	b2,b3,b3-NH3,b4,b4-H2O,y4,b5,b5-H2O,b5-NH3,b6,b6-H2O,b6-NH3,y6,b7,y7,y8,y8-H2O,b9,y9,b10,y10,b11,y11,y11-H2O,y11-NH3,b12,y12,y12-NH3,b13,b13-NH3,	243.108786,356.192846,339.166297,443.224876,425.214312,459.267401,514.261986,496.251422,497.235437,627.346046,609.335482,610.319497,701.394051,724.398806,798.446811,895.499571,877.489006,950.494156,1008.583631,1063.578216,1079.620741,1120.599676,1166.652771,1148.642206,1149.626222,1234.642606,1279.736831,1262.710282,1347.726666,1330.700117,	8469	0	48.19	NQLSALPPELGNLR	2	1521.84	134.851	577	NA	NA	NA	0	0	0	0	743	48.7099	134.851	16938	38.3221	96.529	5.38032718243888e-07	2	2047
26	19	NA	NA	NA	y2,y2-NH3,b3,b4,y4,y4-NH3,b5,y5,y5-NH3,b6,b6-H2O,y6,b7,b7-NH3,y7,y7-NH3,b8,b8-H2O,b8-NH3,y8,b9,b9-NH3,y9,y9-NH3,b10,b10-H2O,b10-NH3,y10,y10-NH3,y11,y11-NH3,b12,b12-NH3,b13,b13-H2O,b13-NH3,	288.203011,271.176462,371.207756,484.291816,516.296261,499.269712,555.328926,644.354841,627.328292,684.371516,666.360952,715.391951,798.414446,781.387897,843.450531,826.423982,926.473026,908.462462,909.446477,957.493461,997.510136,980.483587,1086.536051,1069.509502,1125.568716,1107.558152,1108.542167,1157.573161,1140.546612,1270.657221,1253.630672,1353.661966,1336.635417,1466.746026,1448.735462,1…	8605	0	48.71	ALWLAENQAQPMLR	2	1640.86	134.851	577	NA	NA	NA	0	0	0	0	943	49.7451	134.851	17210	47.3492	87.5019	5.38032718243888e-07	2	2048
26	19	NA	NA	NA	b2,y2,b3,b3-H2O,b3-NH3,y3,y3-NH3,b4,b4-H2O,b4-NH3,y4,y5,y6,y7,y7-H2O,b8,y8,y8-NH3,y9,b10,b10-H2O,b10-NH3,y10,y10-H2O,y10-NH3,b11,y11,y11-H2O,b12,b12-H2O,b12-NH3,y12,y12-H2O,y12-NH3,b13,b13-H2O,b13-NH3,	242.149916,260.196861,329.181946,311.171382,312.155397,374.239791,357.213242,442.266006,424.255442,425.239457,487.323851,624.382761,725.430441,838.514501,820.503936,870.508346,909.551611,892.525062,1056.620021,1108.614936,1090.604372,1091.588387,1153.672781,1135.662216,1136.646232,1221.698996,1266.756841,1248.746276,1335.741926,1317.731362,1318.715377,1353.788871,1335.778306,1336.762322,1448.8259…	9703	0	52.98	LQSLPFALTHLNLK	2	1594.93	134.851	577	NA	NA	NA	0	0	0	0	419	46.2221	134.851	19406	43.7342	91.1169	5.38032718243888e-07	2	2053
34	19	0.999957,0.000043,0.000000,	NA	NA	y3,y3-H2O,y3-NH3,b4,b4,y4,y4-H2O,y4-NH3,b5,y5,y5-H2O,y6,b7,b7,y7,y7-H2O,y7,y7-NH3,y8,b10,y10,b11,y11,b12,b12,b13,b13-NH3,b14,y14,y14-NH3,b15,b15-NH3,y15,b16,b17,	361.219391,343.208826,344.192842,437.239446,459.221389,476.246331,458.235766,459.219782,536.307856,589.330391,571.319826,718.372981,721.387896,743.369839,817.441391,799.430826,839.423334,822.396785,930.525451,1149.537319,1189.624521,1240.639436,1336.692931,1339.707846,1361.689789,1490.732379,1473.705830,1603.816439,1620.841381,1603.814832,1718.843379,1701.816830,1771.865914,1817.911789,1904.94381…	13834	0	73.19	LPPEVANFMQLVELDVSR	2	2079.05	103.804	577	Sodium adduct(1)	NA	NA	1	0	0	0	1314	51.186	103.804	27668	40.5023	63.3016	5.15689101788198e-07	2	2031
35	21	1.000000,	NA	NA	y2,y3,b4,y4,y5,y5-NH3,y6,b7,y7,y7-H2O,b8,y8,b10,b11,b7(2+),b9(2+),b10(2+),b11(2+),y13(2+),b14(2+),b15(2+),b16(2+),b17(2+),	262.150981,361.219391,437.239446,476.246331,589.330391,572.303842,718.372981,721.387896,817.441391,799.430826,868.456306,930.525451,1143.550291,1256.634351,721.387896,1015.491711,1143.550291,1256.634351,1537.767886,1597.829411,1712.856351,1811.924761,1898.956791,	12391	0	65.24	LPPEVANFMQLVELDVSR	3	2073.06	122.436	577	Met_OX(1)	NA	NA	1	0	0	0	1323	51.2156	122.436	24782	52.591	69.8446	4.48373685361906e-05	5	2704
29	22	NA	NA	NA	b2,b2-NH3,y2,b3,y3,y3-NH3,y4,b5,b5-H2O,y5,y5-NH3,b6,b6-H2O,b6-NH3,y6,b7,b7-H2O,y7,y7-H2O,b8,b8-H2O,y8,b9,y9,y5(2+),b6(2+),b7(2+),y7(2+),y8(2+),b10(2+),y12(2+),	243.108786,226.082237,288.203011,356.192846,402.245941,385.219392,459.267401,514.261986,496.251422,572.351461,555.324912,627.346046,609.335482,610.319497,701.394051,724.398806,706.388242,798.446811,780.436246,821.451566,803.441002,895.499571,950.494156,1008.583631,572.351461,627.346046,724.398806,798.446811,895.499571,1063.578216,1279.736831,	8409	0	47.99	NQLSALPPELGNLR	3	1521.84	161.121	577	NA	NA	NA	0	0	0	0	760	48.8081	161.121	16818	46.8354	114.286	6.86083859882452e-07	2	2072
35	21	0.457143,0.457143,0.085714,	NA	NA	b2,y2,y2-H2O,y2-NH3,b3,y3,y3-H2O,b4,b4-H2O,y4,y4,b5,y5,y6,y7,y8,b9,b9,y9,b10,b10,b11,b12,b12,b7(2+),y9(2+),b10(2+),b11(2+),b12(2+),y12(2+),b13(2+),y13(2+),y14(2+),b15(2+),y15(2+),y16(2+),	211.144096,262.150981,244.140416,245.124432,308.196856,361.219391,343.208826,437.239446,419.228882,476.246331,498.228274,536.307856,589.330391,718.372981,817.441391,930.525451,999.496796,1021.478739,1058.584031,1127.555376,1149.537319,1262.621379,1339.707846,1361.689789,721.387896,1080.565974,1149.537319,1262.621379,1361.689789,1472.717804,1490.732379,1543.754914,1642.823324,1718.843379,1771.8659…	13802	0	72.97	LPPEVANFMQLVELDVSR	3	2079.06	122.436	577	Sodium adduct(1)	NA	NA	1	0	0	0	1365	51.3513	122.436	27604	50.8344	71.6011	4.48373685361906e-05	5	2705
34	18	0.999768,0.000232,0.000000,	NA	NA	y3,y3-H2O,y3-NH3,b4,y4,y4-NH3,y5,y5-H2O,y5-NH3,y5,y6,y6,y7,y8,b9,y10,y10,y11,y11,b12,b13,y13,b14,y14,y14-NH3,b15,b15-H2O,b15-NH3,b16,b17,b17-H2O,b17-NH3,	361.219391,343.208826,344.192842,459.221389,476.246331,459.219782,589.330391,571.319826,572.303842,611.312334,718.372981,740.354924,817.441391,930.525451,1021.478739,1189.624521,1211.606464,1336.692931,1358.674874,1361.689789,1490.732379,1521.772971,1603.816439,1620.841381,1603.814832,1718.843379,1700.832815,1701.816830,1817.911789,1904.943819,1886.933255,1887.917270,	13720	0	72.49	LPPEVANFMQLVELDVSR	2	2079.06	93.4674	577	Sodium adduct(1)	NA	NA	1	0	0	0	1254	50.983	93.4674	27440	34.9526	58.5149	7.92924809217188e-05	5	2799
63	31	NA	NA	NA	y2,y3,y3-H2O,y3-NH3,b5,y4,y5,y6,y7,b9,y8,y9,b10,b11,b11-H2O,b12,b12-H2O,b14,b14-NH3,b15,b9(2+),b11(2+),b12(2+),b13(2+),b14(2+),b15(2+),y16(2+),y17(2+),y18(2+),y19(2+),b21(2+),y20(2+),y21(2+),b22(2+),b26(2+),b29(2+),	288.203011,417.245601,399.235036,400.219052,522.303446,530.329661,631.377341,730.445751,843.529811,935.494486,957.572741,1028.609851,1034.562896,1121.594926,1103.584362,1234.678986,1216.668422,1433.774676,1416.748127,1546.858736,935.494486,1121.594926,1234.678986,1362.737566,1433.774676,1546.858736,1680.927871,1794.011931,1865.049041,1993.107621,2086.092696,2106.191681,2193.223711,2199.176756,259…	14066	0	74.51	SLAHLALNDVSLQALPGDVGNLANLVTLELR	4	3226.79	144.514	577	NA	NA	NA	0	0	0	0	492	46.9197	144.514	28132	40.8297	103.685	7.48381057290105e-07	2	2084
56	27	NA	NA	NA	b5,y5,y5-NH3,b6,y6,y6-H2O,b7,b7-NH3,b8,b8-NH3,y8,y8-H2O,y9,y10,y12,y14,b16,b16-H2O,y14(2+),y17(2+),y19(2+),b20(2+),y20(2+),b21(2+),y21(2+),y22(2+),b23(2+),y23(2+),b24(2+),y24(2+),y25(2+),y26(2+),y27(2+),	536.307856,573.324241,556.297692,607.344966,686.408301,668.397736,721.387896,704.361347,868.456306,851.429757,912.503651,894.493086,1025.587711,1140.614651,1410.758691,1596.859131,1795.929846,1777.919282,1596.859131,1954.012721,2166.165191,2268.132856,2294.223771,2381.216916,2425.264261,2572.332671,2607.312266,2686.375601,2720.396326,2757.412711,2856.481121,2985.523711,3082.576471,	13639	0	72.05	LPPEVANFMQLVELDVSRNDIPEIPESIK	3	3292.71	124.06	577	NA	NA	NA	0	1	0	0	1230	50.8991	124.06	27278	39.1658	84.8943	7.71290298869191e-07	2	2086
34	19	0.967153,0.065693,0.967153,	NA	NA	y3,b4,b4,y4,y5,y5-H2O,y5,y5-H2O,y5-NH3,b6,b6-H2O,b7,b8,b8-H2O,y8,b9,b9,b10,b12,y12,b13,b13-H2O,b13,b14,b14,y14,y14-NH3,b15,b16,y16,b17,b17-H2O,b17-NH3,	361.219391,437.239446,459.221389,498.228274,589.330391,571.319826,611.312334,593.301769,594.285785,629.326909,611.316345,743.369839,890.438249,872.427685,974.489337,1021.478739,1021.478739,1149.537319,1361.689789,1472.717804,1490.732379,1472.721815,1512.714322,1603.816439,1625.798382,1642.823324,1625.796775,1740.825322,1839.893732,1890.900617,1926.925762,1908.915198,1909.899213,	13761	0	72.73	LPPEVANFMQLVELDVSR	2	2101.04	103.804	577	Sodium adduct(2)	NA	NA	2	0	0	0	1531	51.8498	103.804	27522	34.9526	68.8514	0.000186176	7	2927
20	17	NA	NA	NA	y1,b2,b2-NH3,y2,b3,b3-H2O,b3-NH3,y3,b4,b4-H2O,b4-NH3,y4,y4-H2O,b5,y5,b6,b6-H2O,b6-NH3,y6,b7,b7-H2O,b7-NH3,y7,y8,y8-H2O,y8-NH3,b9,b9-NH3,y9,y9-H2O,y9-NH3,y10,y10-NH3,	175.118951,202.082236,185.055687,290.145891,315.166296,297.155732,298.139747,403.229951,444.208886,426.198322,427.182337,490.261981,472.251416,531.240916,577.294011,644.324976,626.314412,627.298427,690.378071,731.357006,713.346442,714.330457,777.410101,906.452691,888.442126,889.426142,931.473096,914.446547,1019.536751,1001.526186,1002.510202,1106.568781,1089.542232,	5122	0	36.21	NSLESISSIDR	2	1220.61	140.723	577	NA	NA	NA	0	0	0	0	619	47.9169	140.723	10244	38.3221	102.401	9.0388059883118e-07	2	2116
20	17	NA	NA	NA	b2,b2-H2O,y2,b3,y3,b4,b4-H2O,b5,y4,b6,b6-H2O,y5,b7,b7-H2O,y6,y6-NH3,y7,b8,y8,b9,b9-H2O,y9,y9-H2O,b10,b10-H2O,	201.123366,183.112802,246.181211,298.176126,359.265271,369.213236,351.202672,456.245266,506.333681,569.329326,551.318762,593.365711,656.361356,638.350792,706.449771,689.423222,793.481801,803.429766,864.518911,916.513826,898.503262,961.571671,943.561106,1015.582236,997.571672,	9806	0	53.39	SLPASLSFLVK	2	1161.69	140.723	577	NA	NA	NA	0	0	0	0	309	44.8996	140.723	19612	37.4146	103.309	9.0388059883118e-07	2	2146
20	17	NA	NA	NA	b2,y2,b3,y3,b4,b4-H2O,b5,b5-H2O,y4,b6,b6-H2O,y5,b7,b7-H2O,y6,y7,y7,y8,b9,b9-H2O,y9,y9-H2O,y9-NH3,b10,b10-H2O,	201.123366,246.181211,298.176126,359.265271,369.213236,351.202672,456.245266,438.234702,506.333681,569.329326,551.318762,593.365711,656.361356,638.350792,706.449771,793.481801,793.481801,864.518911,916.513826,898.503262,961.571671,943.561106,944.545122,1015.582236,997.571672,	9887	0	53.73	SLPASLSFLVK	2	1161.69	140.723	577	NA	NA	NA	0	0	0	0	340	45.3148	140.723	19774	37.4146	103.309	9.0388059883118e-07	2	2147
34	19	0.994480,0.842977,0.162543,	NA	NA	y3,b4,b4,y4,y4-NH3,y5,y5-H2O,y5,y5-H2O,y5-NH3,b6,b6-H2O,b6,b6-H2O,b7,b8,y8,y8-H2O,b9,b9,b10,y11,y11,b12,b13,b13,b14,b14-H2O,b14-NH3,b14,y14,y14-NH3,b15,b16,b16-H2O,b16-NH3,b17,b17-H2O,b17-NH3,	361.219391,437.239446,459.221389,476.246331,459.219782,589.330391,571.319826,611.312334,593.301769,594.285785,629.326909,611.316345,629.326909,611.316345,743.369839,868.456306,974.489337,956.478772,1021.478739,1021.478739,1149.537319,1358.674874,1358.674874,1361.689789,1490.732379,1512.714322,1603.816439,1585.805875,1586.789890,1625.798382,1642.823324,1625.796775,1740.825322,1839.893732,1821.8831…	13817	0	73.08	LPPEVANFMQLVELDVSR	2	2101.04	103.804	577	Sodium adduct(2)	NA	NA	2	0	0	0	1512	51.7955	103.804	27634	44.8204	58.9835	0.000186176	7	2928
37	20	0.965822,0.033955,0.000224,	NA	NA	b2,y3,b4,b4,y4,y4-NH3,b5,b5-H2O,y5,y6,b7,y7,b9,y9,b10,b11,b11,b11-NH3,b7(2+),y7(2+),y9(2+),y9(2+),b10(2+),y10(2+),b11(2+),b12(2+),b13(2+),y14(2+),y15(2+),y16(2+),y17(2+),	211.144096,361.219391,437.239446,459.221389,476.246331,459.219782,536.307856,518.297292,589.330391,718.372981,743.369839,817.441391,999.496796,1058.584031,1149.537319,1240.639436,1262.621379,1245.594830,721.387896,817.441391,1058.584031,1080.565974,1149.537319,1211.606464,1262.621379,1361.689789,1490.732379,1642.823324,1771.865914,1868.918674,1965.971434,	13671	0	72.23	LPPEVANFMQLVELDVSR	3	2079.06	105.358	577	Sodium adduct(1)	NA	NA	1	0	0	0	1346	51.2905	105.358	27342	44.8204	60.5378	0.0129641	24	3811
35	19	0.999725,0.000232,0.000043,	NA	NA	b2,y2,y2-H2O,b3,y3,b4,y4,y4,b5,b5-H2O,y5,y6,b7,y7,y8,b9,b9,y9,y9-NH3,b10,b10,b10-NH3,b11,b7(2+),y7(2+),b10(2+),b11(2+),b12(2+),y14(2+),y15(2+),y16(2+),y17(2+),	211.144096,262.150981,244.140416,308.196856,361.219391,437.239446,476.246331,498.228274,536.307856,518.297292,589.330391,718.372981,721.387896,817.441391,930.525451,999.496796,1021.478739,1058.584031,1041.557482,1127.555376,1149.537319,1132.510770,1240.639436,721.387896,817.441391,1149.537319,1262.621379,1361.689789,1642.823324,1771.865914,1868.918674,1965.971434,	13740	0	72.62	LPPEVANFMQLVELDVSR	3	2079.06	100.836	577	Sodium adduct(1)	NA	NA	1	0	0	0	1285	51.089	100.836	27480	46.0328	54.8033	0.04232	31	4205
35	19	1.000000,	NA	NA	y2,y3,y4,y5,b7,y6,y7,b8,b8-NH3,y8,b9,b10,b11,b11-H2O,b12,b12-NH3,y8(2+),b9(2+),b10(2+),b11(2+),b13(2+),b16(2+),	290.145896,389.214306,504.241246,617.325306,721.387896,746.367896,845.436306,868.456306,851.429757,958.520366,999.496796,1127.555376,1240.639436,1222.628872,1339.707846,1322.681297,958.520366,999.496796,1127.555376,1240.639436,1468.750436,1795.929846,	14011	0	74.16	LPPEVANFMQLVELDVSR	3	2085.07	100.836	577	Formylation(1)	NA	NA	1	0	0	0	1314	51.186	100.836	28022	50.8344	50.0016	0.04232	31	4206
36	24	NA	NA	NA	y2,y3,y3-H2O,b4,y4,y4-H2O,b5,y5,b6,b6-H2O,y6,y7,b8,b10,b10-NH3,b11,b12,b13,b7(2+),b8(2+),b10(2+),y10(2+),y11(2+),b12(2+),b13(2+),b14(2+),b15(2+),b17(2+),	262.150981,361.219391,343.208826,437.239446,476.246331,458.235766,536.307856,589.330391,607.344966,589.334402,718.372981,817.441391,868.456306,1127.555376,1110.528827,1240.639436,1339.707846,1468.750436,721.387896,868.456306,1127.555376,1189.624521,1336.692931,1339.707846,1468.750436,1581.834496,1696.861436,1882.961876,	14394	0	76.53	LPPEVANFMQLVELDVSR	3	2057.08	154.28	577	NA	NA	NA	0	0	0	0	1267	51.0278	154.28	28788	83.6233	70.6563	1.44516430712018e-06	2	2184
36	24	NA	NA	NA	y2,y3,y3-H2O,y4,b5,y5,y6,y7,y8,b9,b10,b11,b13,y6(2+),b7(2+),b9(2+),b10(2+),b11(2+),b12(2+),b13(2+),y13(2+),b14(2+),b15(2+),b16(2+),y17(2+),	262.150981,361.219391,343.208826,476.246331,536.307856,589.330391,718.372981,817.441391,930.525451,999.496796,1127.555376,1240.639436,1468.750436,718.372981,721.387896,999.496796,1127.555376,1240.639436,1339.707846,1468.750436,1521.772971,1581.834496,1696.861436,1795.929846,1943.989491,	15295	0	83.79	LPPEVANFMQLVELDVSR	3	2057.08	154.28	577	NA	NA	NA	0	0	0	0	1243	50.9447	154.28	30590	46.4467	107.833	1.44516430712018e-06	2	2185
46	23	NA	NA	NA	y3,y3-NH3,y4,y5,y5-H2O,y5-NH3,y6,b6,b6-H2O,y7,y7-NH3,y8,y9,y9-NH3,b9,b9-H2O,b10,y10,b11,b11-NH3,y11,y11-NH3,y12,y12-NH3,b13,y13,b14,y14,y15,y15-H2O,y15-NH3,y16,y16-H2O,y16-NH3,y17,y17-H2O,y17-NH3,b17,y18,	432.256501,415.229952,503.293611,574.330721,556.320156,557.304172,645.367831,674.387176,656.376612,774.410421,757.383872,903.453011,974.490121,957.463572,987.550936,969.540372,1084.603696,1089.517061,1197.687756,1180.661207,1218.559651,1201.533102,1333.586591,1316.560042,1369.736156,1390.608051,1498.778746,1503.692111,1600.744871,1582.734306,1583.718322,1671.781981,1653.771416,1654.755432,1800.82…	10730	0	57.34	VSVIQFLEAPIGDEDAEEAAAEKR	2	2587.3	110.884	577	NA	NA	NA	0	1	0	0	1521	51.8213	110.884	21460	32.5486	78.3358	1.67332074206495e-06	2	2197
34	18	0.032847,0.934307,0.032847,	1.000000,	NA	b2,y2,y2-H2O,b3,y3,y3-H2O,b4,b5,y5,y5-H2O,b6,y6,b7,b7-NH3,y7,b8,b8,b9,b9,b10,b13,b7(2+),b11(2+),y11(2+),b12(2+),y12(2+),y13(2+),y14(2+),b15(2+),y16(2+),y17(2+),	211.144096,262.150981,244.140416,308.196856,361.219391,343.208826,459.221389,536.307856,589.330391,571.319826,629.326909,718.372981,743.369839,726.343290,817.441391,868.456306,868.456306,1015.491711,1037.473654,1165.532234,1484.745351,721.387896,1256.634351,1374.669789,1377.684704,1488.712719,1559.749829,1658.818239,1734.838294,1884.913589,1981.966349,	12165	0	64.07	LPPEVANFMQLVELDVSR	3	2095.05	93.4674	577	Sodium adduct(1)	Met_OX(1)	NA	2	0	0	0	1376	51.3862	93.4674	24330	53.5167	39.9507	0.0619979	38	4280
60	21	NA	NA	NA	y4,y4-NH3,b7,b8,y7,b9,b9-H2O,b11,y9,y9-NH3,y10,y11,b14,b15,y13,y13-H2O,y13-NH3,b16,b16-H2O,b17,y15,y15-NH3,b18,b18-H2O,b18,b18-H2O,b19,y17,y17-NH3,b20,y18,y18-H2O,	494.297301,477.270752,566.329646,653.361676,747.439931,766.445736,748.435172,922.535606,1004.541101,987.514552,1103.609511,1160.630971,1181.616036,1318.674946,1404.752141,1386.741576,1387.725592,1405.706976,1387.696412,1492.739006,1628.843081,1611.816532,1629.797916,1611.787352,1629.797916,1611.787352,1726.850676,1852.934021,1835.907472,1873.919086,1967.960961,1949.950396,	9050	0	50.36	AGGPLGLSIVGGSDHSSHPFGVQEPGVFISK	2	3033.55	67.887	577	NA	NA	NA	0	0	0	0	1418	51.5168	67.887	18100	19.5101	48.377	2.16511054510354e-06	2	2230
56	24	0.001004,0.812660,0.152374,0.028570,0.005357,0.000035,	NA	NA	y3,b4,b5,y5,y5-H2O,y5,y6,y6-NH3,b7,b8,b8,y8,y8,y9,y13,b15,b15-H2O,y13(2+),y14(2+),y16(2+),b20(2+),b21(2+),y22(2+),b23(2+),y23(2+),b24(2+),y24(2+),y25(2+),b26(2+),y26(2+),y27(2+),	347.228891,459.221389,536.307856,573.324241,555.313676,595.306184,686.408301,669.381752,721.387896,868.456306,868.456306,912.503651,934.485594,1025.587711,1519.772664,1718.843379,1700.832815,1497.790721,1596.859131,1824.970131,2290.114799,2403.198859,2594.314614,2629.294209,2708.357544,2742.378269,2779.394654,2878.463064,2968.473619,3007.505654,3104.558414,	13728	0	72.54	LPPEVANFMQLVELDVSRNDIPEIPESIK	3	3314.7	97.5941	577	Sodium adduct(1)	NA	NA	1	1	0	0	1357	51.3258	97.5941	27456	41.499	56.0951	0.00409669	15	3591
18	16	NA	NA	NA	y1,b2,y2,b3,y3,b4,b5,b5-NH3,y4,y5,y6,y6-NH3,b7,b7-NH3,y7,y7-H2O,y7-NH3,b8,b8-H2O,b8-NH3,y8,y8-H2O,y8-NH3,b9,b9-H2O,b9-NH3,y9,y9-NH3,	175.118951,227.175396,274.187361,298.212506,389.214301,397.280916,511.323846,494.297297,517.272881,574.294341,688.337271,671.310722,696.403886,679.377337,787.405681,769.395116,770.379132,811.430826,793.420262,794.404277,858.442791,840.432226,841.416242,910.499236,892.488672,893.472687,971.526851,954.500302,	3704	0	31.2	ILAVNGQDVR	2	1084.61	139.011	577	NA	NA	NA	0	0	0	0	414	46.17	139.011	7408	37.6081	101.403	2.91114703378864e-06	2	2259
18	16	NA	NA	NA	y1,b2,y2,b3,y3,b4,b5,b5-NH3,y4,y5,y6,y6-NH3,b7,b7-NH3,y7,y7-NH3,b8,b8-H2O,b8-NH3,y8,y8-H2O,y8-NH3,b9,b9-H2O,y9,y9-H2O,	175.118951,227.175396,274.187361,298.212506,389.214301,397.280916,511.323846,494.297297,517.272881,574.294341,688.337271,671.310722,696.403886,679.377337,787.405681,770.379132,811.430826,793.420262,794.404277,858.442791,840.432226,841.416242,910.499236,892.488672,971.526851,953.516286,	3803	0	31.6	ILAVNGQDVR	2	1084.61	139.011	577	NA	NA	NA	0	0	0	0	421	46.2428	139.011	7606	47.6423	91.3692	2.91114703378864e-06	2	2262
18	16	NA	NA	NA	y1,y1-NH3,b3,y2,y2-H2O,y2-NH3,b4,y3,b5,b5-H2O,b6,b6-H2O,y4,y5,b7,b7-H2O,y6,b8,b8-H2O,y7,y7-H2O,y7-NH3,b9,b9-H2O,y8,y8-H2O,y8-NH3,y9,	175.118951,158.092402,244.092786,262.150981,244.140416,245.124432,315.129896,361.219391,372.151356,354.140792,485.235416,467.224852,508.287801,621.371861,632.303826,614.293262,678.393321,731.372236,713.361672,749.430431,731.419866,732.403882,818.404266,800.393702,864.457371,846.446806,847.430822,921.478831,	4552	0	34.19	AGDAGIFVSR	2	992.516	139.011	577	NA	NA	NA	0	0	0	0	397	45.9879	139.011	9104	42.9947	96.0168	2.91114703378864e-06	2	2266
18	16	NA	NA	NA	y1,b3,y2,y2-H2O,y2-NH3,b4,y3,b5,b5-H2O,b6,b6-H2O,y4,y5,y5-H2O,y5-NH3,b7,b7-H2O,y6,b8,b8-H2O,y7,y7-H2O,y7-NH3,b9,b9-H2O,y8,y9,y9-H2O,	175.118951,244.092786,262.150981,244.140416,245.124432,315.129896,361.219391,372.151356,354.140792,485.235416,467.224852,508.287801,621.371861,603.361296,604.345312,632.303826,614.293262,678.393321,731.372236,713.361672,749.430431,731.419866,732.403882,818.404266,800.393702,864.457371,921.478831,903.468266,	4654	0	34.58	AGDAGIFVSR	2	992.515	139.011	577	NA	NA	NA	0	0	0	0	386	45.8659	139.011	9308	47.6423	91.3692	2.91114703378864e-06	2	2267
18	16	NA	NA	NA	b2,y1,y2,y2-NH3,b3,b3-H2O,y3,b4,b4-H2O,b5,b5-H2O,y4,b6,b6-H2O,y5,y6,y6-NH3,b7,b7-H2O,y7,b8,b8-H2O,b9,b9-H2O,y8,y8-H2O,	173.055676,175.118951,262.150981,245.124432,288.082616,270.072052,375.235041,417.125206,399.114642,474.146666,456.136102,522.303451,587.230726,569.220162,635.387511,692.408971,675.382422,734.299136,716.288572,821.451561,847.383196,829.372632,934.415226,916.404662,936.478501,918.467936,	5343	0	36.98	GDDEGIFISR	2	1108.53	139.011	577	NA	NA	NA	0	0	0	0	483	46.8395	139.011	10686	47.6423	91.3692	2.91114703378864e-06	2	2272
18	16	NA	NA	NA	y1,b2,y2,b4,y3,y4,b5,b5-H2O,y5,b6,b6-H2O,b7,y6,y6-NH3,y7,b8,y8,b9,y9,y9-H2O,	175.118951,201.123366,288.203011,413.203066,417.245601,546.288191,560.271476,542.260912,617.325301,631.308586,613.298022,760.351176,764.393711,747.367162,879.420651,889.393766,976.473411,1002.477826,1063.505441,1045.494876,	7124	0	43.44	LSPDFAEELR	2	1176.59	139.011	577	NA	NA	NA	0	0	0	0	584	47.6641	139.011	14248	63.4428	75.5687	2.91114703378864e-06	2	2291
75	35	0.000022,0.499989,0.499989,	NA	NA	y5,y5-NH3,y6,y6-NH3,y7,b8,b9,b9-NH3,y8,y9,b10,b10-H2O,y10,y10-NH3,b12,b12-H2O,b14,b15,b17,b17,y18,y19,b19,b9(2+),y14(2+),y15(2+),b17(2+),y19(2+),y21(2+),y21(2+),y23(2+),y23(2+),y26(2+),y27(2+),y27(2+),y28(2+),b29(2+),y29(2+),y30(2+),b31(2+),y31(2+),b33(2+),y33(2+),y34(2+),y35(2+),y36(2+),	626.340891,609.314342,697.378001,680.351452,834.436911,834.471956,905.509066,888.482517,931.489671,988.511131,1018.593126,1000.582562,1102.554061,1085.527512,1281.717709,1263.707145,1469.779659,1575.856296,1809.917939,1809.917939,1903.946241,1960.967701,1995.981989,905.509066,1539.735201,1636.787961,1809.917939,1960.967701,2147.031751,2169.013694,2359.111451,2381.093394,2697.213924,2803.290561,28…	11517	0	61.01	LPQPEAVVALLQGMQPDGEGPVAPGGWHNGPHAPWAPR	3	3955.94	153.048	577	Sodium adduct(1)	NA	NA	1	0	0	0	1178	50.7115	153.048	23034	40.3722	112.676	1.34345949135554e-16	0	642
78	33	0.992233,0.006541,0.001226,	NA	NA	y2,y2-NH3,b3,b3-NH3,y3,y5,b7,y7,b8,b9,b10,y10,b11,y11,b12,b12,b13,b15,b15-H2O,b15,y15,y5(2+),b6(2+),b9(2+),y9(2+),b10(2+),y10(2+),b11(2+),b12(2+),b13(2+),b14(2+),y13(2+),y14(2+),y15(2+),y16(2+),b17(2+),b17(2+),b19(2+),b20(2+),y21(2+),b22(2+),y22(2+),b23(2+),y31(2+),y32(2+),	272.171711,255.145162,339.202676,322.176127,343.208821,626.340891,735.403546,834.436911,834.471956,905.509066,1018.593126,1102.554061,1131.677186,1239.612971,1259.735766,1281.717709,1316.757226,1575.856296,1557.845732,1597.838239,1636.787961,626.340891,658.317079,905.509066,988.511131,1018.593126,1102.554061,1131.677186,1281.717709,1316.757226,1469.779659,1482.713741,1539.735201,1636.787961,1707.…	11545	0	61.16	LPQPEAVVALLQGMQPDGEGPVAPGGWHNGPHAPWAPR	5	3955.94	129.531	577	Sodium adduct(1)	NA	NA	1	0	0	0	1189	50.7518	129.531	23090	39.4832	90.0481	7.61053516838643e-11	0	1238
24	18	NA	NA	NA	y1,b2,b3,b4,y3,b5,y4,b6,y5,b8,b8-H2O,y7,b9,y8,y8-H2O,y8-NH3,y9,y9-H2O,b11,y10,y11,y11-NH3,b12,b12-H2O,	175.118951,185.128446,256.165556,327.202666,402.245941,426.271076,489.277971,523.323836,546.299431,681.392976,663.382412,704.368571,738.414436,801.421331,783.410766,784.394782,900.489741,882.479176,924.514876,971.526851,1042.563961,1025.537412,1052.573456,1034.562892,	3689	0	31.14	ALAAVPSAGSVQR	2	1226.68	131.301	577	NA	NA	NA	0	0	0	0	417	46.2014	131.301	7378	42.1236	89.1776	3.25237953702727e-06	2	2317
24	18	NA	NA	NA	b2,b3,b4,y3,b5,y4,b6,y5,b8,b8-H2O,y7,b9,b9-H2O,y8,y8-H2O,y8-NH3,b10,b10-H2O,y9,y9-NH3,b11,b11-H2O,y10,y11,b12,	185.128446,256.165556,327.202666,402.245941,426.271076,489.277971,523.323836,546.299431,681.392976,663.382412,704.368571,738.414436,720.403872,801.421331,783.410766,784.394782,825.446466,807.435902,900.489741,883.463192,924.514876,906.504312,971.526851,1042.563961,1052.573456,	3780	0	31.49	ALAAVPSAGSVQR	2	1226.68	131.301	577	NA	NA	NA	0	0	0	0	422	46.2531	131.301	7560	21.2749	110.026	3.25237953702727e-06	2	2318
24	18	NA	NA	NA	b2,b3,b4,y3,b5,y4,b6,y5,b8,b8-H2O,y7,b9,b9-H2O,y8,y8-H2O,y8-NH3,b10,y9,y9-NH3,b11,b11-H2O,y10,y11,b12,	185.128446,256.165556,327.202666,402.245941,426.271076,489.277971,523.323836,546.299431,681.392976,663.382412,704.368571,738.414436,720.403872,801.421331,783.410766,784.394782,825.446466,900.489741,883.463192,924.514876,906.504312,971.526851,1042.563961,1052.573456,	3869	0	31.85	ALAAVPSAGSVQR	2	1226.69	131.301	577	NA	NA	NA	0	0	0	0	420	46.2325	131.301	7738	29.3102	101.991	3.25237953702727e-06	2	2319
24	18	NA	NA	NA	b2,y2,b3,b3-H2O,y3,y4,b5,b5-H2O,y5,y6,y7,b8,b8-H2O,b8-NH3,y8,y8-H2O,b9,b9-H2O,b9-NH3,y9,y9-H2O,y9-NH3,b10,b10-H2O,y10,y10-H2O,y10-NH3,b11,b11-NH3,y11,y11-H2O,y11-NH3,y12,	213.159746,246.156061,300.191776,282.181212,375.198651,476.246331,527.318766,509.308202,575.314741,690.341681,789.410091,798.435576,780.425012,781.409027,846.431551,828.420986,897.503986,879.493422,880.477437,960.474481,942.463916,943.447932,998.551666,980.541102,1073.558541,1055.547976,1056.531992,1127.594256,1110.567707,1160.590571,1142.580006,1143.564022,1273.674631,	6316	0	40.52	VLSINGVDVTEAR	2	1372.74	131.301	577	NA	NA	NA	0	0	0	0	583	47.6567	131.301	12632	30.5616	100.74	3.25237953702727e-06	2	2330
24	18	NA	NA	NA	b2,b3,y3,b4,b5,y5,y6,y7,b7,b8,b8-H2O,y8,y8,y9,y9-H2O,y10,b11,y11,b12,y12,	211.144096,324.228156,385.255771,437.312216,534.364976,539.329991,626.362021,755.404611,760.460326,847.492356,829.481792,852.457371,852.457371,949.510131,931.499566,1062.594191,1098.619336,1175.678251,1211.703396,1272.731011,	8043	0	46.7	LPLLPPESPGPLR	2	1385.81	131.301	577	NA	NA	NA	0	0	0	0	359	45.5509	131.301	16086	33.8129	97.4883	3.25237953702727e-06	2	2339
24	18	NA	NA	NA	y2,b3,y3,y4,b5,b5-H2O,y5,y5-NH3,b6,b6-H2O,y6,y6-NH3,b7,y7,y7-NH3,b8,y8,b9,y9,b10,y10,b11,b11-H2O,b11-NH3,b12,b12-NH3,	288.203011,330.165956,416.261591,530.304521,572.292606,554.282042,601.341631,584.315082,685.376666,667.366102,716.368571,699.342022,798.460726,829.452631,812.426082,913.487666,942.536691,984.524776,1055.620751,1098.567706,1184.663341,1226.626286,1208.615722,1209.599737,1339.710346,1322.683797,	11255	0	59.73	SLEELLLDANQLR	2	1513.82	131.301	577	NA	NA	NA	0	0	0	0	661	48.202	131.301	22510	46.8354	84.4657	3.25237953702727e-06	2	2346
37	24	NA	NA	NA	y2,y2-NH3,b2,b2-H2O,y3,y4,y5,y6,y6-NH3,b7,y9,y10,b9,b9-H2O,b9-NH3,b10,b10-H2O,b10-NH3,y11,y13,y9(2+),y10(2+),y11(2+),y12(2+),y13(2+),y14(2+),b14(2+),y16(2+),b16(2+),y17(2+),b17(2+),	232.140411,215.113862,243.133926,225.123362,303.177521,374.214631,503.257221,604.304901,587.278352,739.398466,901.437361,958.458821,1062.536686,1044.526122,1045.510137,1119.558146,1101.547582,1102.531597,1144.538131,1394.681101,901.437361,958.458821,1144.538131,1281.597041,1394.681101,1495.728781,1517.738286,1680.808821,1717.817986,1777.861581,1788.855096,	6452	0	40.99	ELPGQTLHWGPEATEAAGR	3	2019.99	150.174	577	NA	NA	NA	0	0	0	0	1295	51.1227	150.174	12904	47.5611	102.613	3.26721453683536e-06	2	2350
37	24	NA	NA	NA	y2,y2-NH3,y3,y3-H2O,y4,y5,y6,b7,y7,b8,y8,y8-NH3,y9,b10,b11,b12,b7(2+),y7(2+),y8(2+),b9(2+),b10(2+),b11(2+),b12(2+),y12(2+),b16(2+),y16(2+),b17(2+),	262.150981,245.124432,361.219391,343.208826,476.246331,589.330391,718.372981,721.387896,817.441391,868.456306,930.525451,913.498902,1058.584031,1127.555376,1240.639436,1339.707846,721.387896,817.441391,930.525451,999.496796,1127.555376,1240.639436,1339.707846,1450.735861,1795.929846,1846.936731,1882.961876,	14850	0	79.81	LPPEVANFMQLVELDVSR	3	2057.07	150.174	577	NA	NA	NA	0	0	0	0	1213	50.8386	150.174	29700	57.0324	93.1419	4.23419417238247e-06	2	2375
57	29	NA	NA	NA	y4,b6,y6,b7,y7,y8,b8,b8-H2O,b10,b11,b11-H2O,y11,b12,b13,b14,b14-H2O,b14-NH3,b15,b16,b17,b17-H2O,y6(2+),y7(2+),y9(2+),y10(2+),y11(2+),y12(2+),b15(2+),y15(2+),b16(2+),b17(2+),y20(2+),b21(2+),b22(2+),	460.251421,599.303496,644.336211,700.351176,731.368241,802.405351,813.435236,795.424672,999.499286,1128.541876,1110.531312,1182.590181,1257.584466,1385.643046,1514.685636,1496.675072,1497.659087,1629.712576,1758.755166,1886.813746,1868.803182,644.336211,731.368241,988.484661,1085.537421,1182.590181,1310.648761,1629.712576,1683.760881,1758.755166,1886.813746,2255.968691,2338.035686,2425.067716,	8222	0	47.3	LALDGETLGEEEQEDEQPPWASPSPTSR	4	3068.39	140.57	577	NA	NA	NA	0	0	0	0	812	49.0956	140.57	16444	48.8224	91.7474	4.24514552850199e-06	2	2376
76	30	0.085714,0.457143,0.457143,	NA	NA	b3,y3,y3-NH3,b4,b5,y5,y6,b7,b7-NH3,y7,b8,b9,b10,y10,y10-NH3,b11,b12,b13,y12,b14,b15,y15,y16,b17,b17,y8(2+),y10(2+),b14(2+),y15(2+),y16(2+),b17(2+),b18(2+),b21(2+),y22(2+),y23(2+),y24(2+),y28(2+),y30(2+),b31(2+),	339.202676,343.208821,326.182272,436.255436,565.298026,626.340891,697.378001,735.403546,718.376997,834.436911,834.471956,905.509066,1018.593126,1102.554061,1085.527512,1131.677186,1259.735766,1316.757226,1425.692281,1469.779659,1597.838239,1636.787961,1707.825071,1787.935996,1809.917939,931.489671,1102.554061,1469.779659,1636.787961,1707.825071,1809.917939,1866.939399,2150.056209,2262.058691,2381…	11619	0	61.52	LPQPEAVVALLQGMQPDGEGPVAPGGWHNGPHAPWAPR	4	3955.94	109.163	577	Sodium adduct(1)	NA	NA	1	0	0	0	1183	50.7298	109.163	23238	36.902	72.2605	5.1137413333635e-07	2	2029
54	26	NA	NA	NA	y3,y4,b5,b5-H2O,y5,b6,b6-H2O,y6,y7,y8,b10,b10-NH3,y9,y9-H2O,b11,b11-H2O,b12,b12-NH3,b13,b13-NH3,y12,b17,y13(2+),y15(2+),y16(2+),y18(2+),y19(2+),y22(2+),y23(2+),b24(2+),y24(2+),y25(2+),y26(2+),	401.287071,502.334751,506.224526,488.213962,615.418811,634.283106,616.272542,716.466491,829.550551,958.593141,1046.490136,1029.463587,1087.635731,1069.625166,1159.574196,1141.563632,1272.658256,1255.631707,1401.700846,1384.674297,1458.804971,1838.975886,1614.906081,1782.995951,1912.038541,2138.206661,2251.290721,2550.413691,2678.472271,2682.362046,2793.499211,2940.567621,3027.599651,	13559	0	71.66	GVSFDQANNLLIEPARIEEEELTLTILR	3	3183.7	119.55	577	NA	NA	NA	0	1	0	0	943	49.7451	119.55	27118	50.3139	69.236	4.79965507745745e-06	2	2382
54	26	NA	NA	NA	y4,y4-H2O,b5,b5-H2O,y5,y6,y6-H2O,b8,y7,y8,b10,b10-NH3,y9,y9-H2O,y10,b12,b12-NH3,y11,b13,y12,b15,y13(2+),y15(2+),y16(2+),y17(2+),y18(2+),y19(2+),y20(2+),y21(2+),y24(2+),y25(2+),b27(2+),	502.334751,484.324186,506.224526,488.213962,615.418811,716.466491,698.455926,819.363146,829.550551,958.593141,1046.490136,1029.463587,1087.635731,1069.625166,1216.678321,1272.658256,1255.631707,1345.720911,1401.700846,1458.804971,1569.790716,1614.906081,1782.995951,1912.038541,2025.122601,2138.206661,2251.290721,2365.333651,2479.376581,2793.499211,2940.567621,3009.577846,	15047	0	81.43	GVSFDQANNLLIEPARIEEEELTLTILR	3	3183.69	119.55	577	NA	NA	NA	0	1	0	0	960	49.8227	119.55	30094	37.5039	82.046	4.79965507745745e-06	2	2383
77	33	NA	NA	NA	y2,y2-NH3,y5,b7,y7,b8,b9,b10,y10,b11,y11,y11-NH3,b12,b12-H2O,b13,b13-H2O,y12,b14,b14-H2O,b14-NH3,y14,b15,b9(2+),y8(2+),b10(2+),b11(2+),b12(2+),b13(2+),b14(2+),y13(2+),y14(2+),y15(2+),y16(2+),y18(2+),y19(2+),y20(2+),y21(2+),y22(2+),y23(2+),	272.171711,255.145162,626.340891,735.403546,834.436911,834.471956,905.509066,1018.593126,1102.554061,1131.677186,1239.612971,1222.586422,1259.735766,1241.725202,1316.757226,1298.746662,1425.692281,1447.797716,1429.787152,1430.771167,1539.735201,1575.856296,905.509066,931.489671,1018.593126,1131.677186,1259.735766,1316.757226,1447.797716,1482.713741,1539.735201,1636.787961,1707.825071,1903.946241,…	11487	0	60.87	LPQPEAVVALLQGMQPDGEGPVAPGGWHNGPHAPWAPR	5	3933.97	131.479	577	NA	NA	NA	0	0	0	0	1265	51.0209	131.479	22974	33.4997	97.9792	4.84768132770013e-06	2	2385
77	30	0.085714,0.457143,0.457143,	NA	NA	y2,b3,y5,b7,y7,b8,b9,b10,y10,b12,b12-NH3,b13,b14,b14,y5(2+),b8(2+),b9(2+),y9(2+),b10(2+),b11(2+),b13(2+),b14(2+),y13(2+),y14(2+),y15(2+),y16(2+),b17(2+),y19(2+),b19(2+),b20(2+),b22(2+),b23(2+),y28(2+),y32(2+),y32(2+),	272.171711,339.202676,626.340891,735.403546,834.436911,834.471956,905.509066,1018.593126,1102.554061,1259.735766,1242.709217,1316.757226,1447.797716,1469.779659,626.340891,856.453899,905.509066,988.511131,1018.593126,1131.677186,1316.757226,1469.779659,1482.713741,1539.735201,1636.787961,1707.825071,1809.917939,1960.967701,1995.981989,2053.003449,2249.124619,2320.161729,2938.356564,3298.632611,33…	11469	0	60.8	LPQPEAVVALLQGMQPDGEGPVAPGGWHNGPHAPWAPR	5	3955.94	107.458	577	Sodium adduct(1)	NA	NA	1	0	0	0	1178	50.7115	107.458	22938	41.2836	66.1743	9.55867706910609e-07	2	2156
38	21	NA	NA	NA	y3,b3,y4,y6,y6-H2O,y6-NH3,y7,y7-NH3,y8,y9,y9-NH3,y10,y11,y11-NH3,y12,b12,b12-NH3,y13,y13-NH3,b13,b13-NH3,y14,y14-H2O,y14-NH3,b14,b14-H2O,b14-NH3,b15,y16,y16-H2O,b16,b16-H2O,y17,y17-H2O,b17,b19,	301.187021,315.166296,358.208481,584.303831,566.293266,567.277282,671.335861,654.309312,784.419921,913.462511,896.435962,1069.563621,1184.590561,1167.564012,1297.674621,1331.643736,1314.617187,1384.706651,1367.680102,1444.727796,1427.701247,1471.738681,1453.728116,1454.712132,1531.759826,1513.749262,1514.733277,1628.812586,1671.854771,1653.844206,1757.855176,1739.844612,1800.897361,1782.886796,18…	7347	0	44.21	NSLESISSIDRELSPEGPGK	2	2115.05	112.802	577	NA	NA	NA	0	1	0	0	1376	51.3862	112.802	14694	37.5911	75.2104	6.0823508405617e-06	2	2392
34	20	NA	NA	NA	y4,y4,b5,y5,y6,b7,b7-H2O,y7,b8,y8,b10,y10,b11,b11-NH3,b12,b12-H2O,b12-NH3,y12,b13,b13-H2O,y13,y14,y15,b16,b16-NH3,y16,	476.246331,476.246331,536.307856,589.330391,718.372981,721.387896,703.377332,817.441391,868.456306,930.525451,1127.555376,1189.624521,1240.639436,1223.612887,1339.707846,1321.697282,1322.681297,1450.735861,1468.750436,1450.739872,1521.772971,1620.841381,1749.883971,1795.929846,1778.903297,1846.936731,	15579	0	86.5	LPPEVANFMQLVELDVSR	2	2057.07	114.639	577	NA	NA	NA	0	0	0	0	1250	50.9691	114.639	31158	25.2537	89.3848	6.29012377427565e-06	2	2397
78	30	1.000000,	NA	NA	y5,b7,y7,b8,b9,b9,y8,b10,b10-H2O,b11,b12,b13,y15,b17,b18,y19,y5(2+),b9(2+),y8(2+),b10(2+),b11(2+),b13(2+),y15(2+),y22(2+),y23(2+),y24(2+),y25(2+),y27(2+),y28(2+),b35(2+),b37(2+),	626.340891,735.403546,834.436911,834.471956,905.509066,905.509066,931.489671,1018.593126,1000.582562,1131.677186,1259.735766,1316.757226,1636.787961,1803.930911,1860.952371,1960.967701,626.340891,905.509066,931.489671,1018.593126,1131.677186,1316.757226,1636.787961,2262.058691,2359.111451,2487.170031,2634.205436,2819.285476,2932.369536,3607.753841,3775.843711,	11243	0	59.69	LPQPEAVVALLQGMQPDGEGPVAPGGWHNGPHAPWAPR	4	3949.96	105.789	577	Met_OX(1)	NA	NA	1	0	0	0	1308	51.1661	105.789	22486	48.3632	57.4253	1.73438177229637e-06	2	2203
16	15	NA	NA	NA	y1,b2,y2,b3,b4,y3,y3-NH3,y4,b5,b6,y5,y6,b7,b7-H2O,b7-NH3,y7,y7-H2O,b8,b8-NH3,y8,y8-H2O,y8-NH3,	147.112801,211.144096,260.196861,326.171036,383.192496,388.255441,371.228892,445.276901,496.276556,553.298016,558.360961,615.382421,681.356596,663.346032,664.330047,730.409361,712.398796,794.440656,777.414107,827.462121,809.451556,810.435572,	5310	0	36.89	LPDGIGQLK	2	940.546	138.386	577	NA	NA	NA	0	0	0	0	215	43.3244	138.386	10620	42.1236	96.2627	6.45742736865102e-06	2	2419
44	24	NA	NA	NA	b2,b2-H2O,b2-NH3,y4,b3,b3-H2O,b3-NH3,b4,b4-H2O,b4-NH3,y6,y7,y9,y10,b10,b10-H2O,b10-NH3,y11,y12,y13,y13-NH3,y9(2+),b10(2+),y11(2+),y12(2+),b11(2+),b12(2+),y13(2+),y14(2+),y16(2+),y17(2+),y18(2+),y19(2+),	258.144826,240.134262,241.118277,374.214631,387.187416,369.176852,370.160867,500.271476,482.260912,483.244927,604.304901,675.342011,901.437361,958.458821,1133.594926,1115.584362,1116.568377,1144.538131,1281.597041,1394.681101,1377.654552,901.437361,1133.594926,1144.538131,1281.597041,1319.674236,1376.695696,1394.681101,1495.728781,1680.808821,1777.861581,1890.945641,2019.988231,	5104	0	36.14	EKELPGQTLHWGPEATEAAGR	3	2277.13	126.293	577	NA	NA	NA	0	1	0	0	1538	51.8696	126.293	10208	57.8879	68.4051	6.92796651270818e-06	2	2446
79	30	0.934307,0.032847,0.032847,	NA	NA	y2,b3,y5,b7,y7,b8,b9,b10,b11,b11-H2O,b11-NH3,b12,b13,y7(2+),b8(2+),b9(2+),y9(2+),b10(2+),b11(2+),y11(2+),b13(2+),b14(2+),y14(2+),y15(2+),b16(2+),y16(2+),b17(2+),y19(2+),b19(2+),b20(2+),b21(2+),b22(2+),y22(2+),b23(2+),y25(2+),	272.171711,339.202676,626.340891,735.403546,834.436911,834.471956,905.509066,1018.593126,1131.677186,1113.666622,1114.650637,1259.735766,1316.757226,834.436911,834.471956,905.509066,988.511131,1018.593126,1131.677186,1239.612971,1316.757226,1469.779659,1539.735201,1636.787961,1672.909056,1707.825071,1809.917939,1960.967701,1995.981989,2053.003449,2150.056209,2249.124619,2262.058691,2320.161729,26…	11618	0	61.51	LPQPEAVVALLQGMQPDGEGPVAPGGWHNGPHAPWAPR	5	3955.94	104.153	577	Sodium adduct(1)	NA	NA	1	0	0	0	1199	50.7882	104.153	23236	27.236	76.9174	3.05922239220535e-06	2	2307
23	18	NA	NA	NA	b1,y1,b2,b2-NH3,b3,y2,y2-NH3,b4,y3,y4,y4-H2O,b6,y5,y5-NH3,b7,b7-NH3,b8,b8-NH3,b9,b9-NH3,y2(2+),y3(2+),y5(2+),b7(2+),b10(2+),	129.102236,175.118951,242.186296,225.159747,299.207756,303.177531,286.150982,412.291816,416.261591,545.304181,527.293616,614.350786,659.347111,642.320562,728.393716,711.367167,857.436306,840.409757,970.520366,953.493817,303.177531,416.261591,659.347111,728.393716,1098.578946,	3380	0	30.07	KLGLSDNEIQR	3	1272.69	136.89	577	NA	NA	NA	0	1	0	0	667	48.2413	136.89	6760	73.6371	63.2531	8.01689618833356e-06	2	2468
74	27	0.085714,0.457143,0.457143,	NA	NA	b5,y5,b6,y6,y7,b8,b8,b9,y8,y8-NH3,y9,b10,b11,y11,b12,b14,b15,b15,y15,b17,b17-H2O,b17,b17-H2O,b19,b9(2+),y15(2+),y16(2+),y19(2+),y21(2+),b21(2+),y21(2+),y22(2+),y23(2+),y24(2+),y26(2+),y32(2+),y35(2+),y36(2+),	565.298026,626.340891,658.317079,697.378001,834.436911,834.471956,856.453899,905.509066,931.489671,914.463122,988.511131,1018.593126,1131.677186,1239.612971,1281.717709,1469.779659,1575.856296,1597.838239,1636.787961,1809.917939,1791.907375,1809.917939,1791.907375,1995.981989,905.509066,1636.787961,1707.825071,1960.967701,2147.031751,2150.056209,2169.013694,2262.058691,2381.093394,2487.170031,269…	11592	0	61.39	LPQPEAVVALLQGMQPDGEGPVAPGGWHNGPHAPWAPR	3	3955.94	89.9226	577	Sodium adduct(1)	NA	NA	1	0	0	0	1185	50.7372	89.9226	23184	35.1823	54.7402	0.000218046	7	2952
55	26	NA	NA	NA	y4,y5,b7,b7-H2O,y6,y7,y7,y8,b10,b10-NH3,b11,b11-H2O,b12,b12-NH3,y11,b13,b13-NH3,b14,y7(2+),y15(2+),y16(2+),y17(2+),y19(2+),b21(2+),y20(2+),y21(2+),y22(2+),y23(2+),y24(2+),y26(2+),y27(2+),	502.334751,615.418811,705.320216,687.309652,716.466491,829.550551,829.550551,958.593141,1046.490136,1029.463587,1159.574196,1141.563632,1272.658256,1255.631707,1345.720911,1401.700846,1384.674297,1498.753606,829.550551,1782.995951,1912.038541,2025.122601,2251.290721,2355.146246,2365.333651,2479.376581,2550.413691,2678.472271,2793.499211,3027.599651,3126.668061,	14778	0	79.28	GVSFDQANNLLIEPARIEEEELTLTILR	3	3183.7	117.208	577	NA	NA	NA	0	1	0	0	909	49.5856	117.208	29556	35.4497	81.7581	9.91392039130376e-06	2	2493
55	26	NA	NA	NA	y5,y6,y7,y8,b10,b10-NH3,b11,b11-NH3,y10,b12,b12-NH3,y11,b13,b15,b13(2+),y14(2+),b16(2+),y15(2+),y16(2+),y17(2+),y19(2+),b21(2+),y20(2+),y21(2+),y22(2+),y23(2+),y24(2+),y25(2+),b27(2+),	615.418811,716.466491,829.550551,958.593141,1046.490136,1029.463587,1159.574196,1142.547647,1216.678321,1272.658256,1255.631707,1345.720911,1401.700846,1569.790716,1401.700846,1685.943191,1725.891826,1782.995951,1912.038541,2025.122601,2251.290721,2355.146246,2365.333651,2479.376581,2550.413691,2678.472271,2793.499211,2940.567621,3009.577846,	15138	0	82.17	GVSFDQANNLLIEPARIEEEELTLTILR	3	3183.69	117.208	577	NA	NA	NA	0	1	0	0	979	49.9078	117.208	30276	41.8695	75.3383	9.91392039130376e-06	2	2494
55	26	NA	NA	NA	y4,b5,b5-H2O,y5,y6,y7,b10,b10-NH3,b11,b11-NH3,y10,b12,b12-NH3,b13,y12,b15,b7(2+),y11(2+),b15(2+),y13(2+),y15(2+),y16(2+),y17(2+),y18(2+),y19(2+),y21(2+),y23(2+),y24(2+),y25(2+),y26(2+),	502.334751,506.224526,488.213962,615.418811,716.466491,829.550551,1046.490136,1029.463587,1159.574196,1142.547647,1216.678321,1272.658256,1255.631707,1401.700846,1458.804971,1569.790716,705.320216,1345.720911,1569.790716,1614.906081,1782.995951,1912.038541,2025.122601,2138.206661,2251.290721,2479.376581,2678.472271,2793.499211,2940.567621,3027.599651,	15670	0	87.46	GVSFDQANNLLIEPARIEEEELTLTILR	3	3183.7	117.208	577	NA	NA	NA	0	1	0	0	980	49.9123	117.208	31340	37.1458	80.062	9.91392039130376e-06	2	2495
30	19	NA	NA	NA	b4,y3,b5,b5-H2O,y4,b7,y6,b8,y7,b9,b9-H2O,y8,b10,y9,y9-NH3,y10,y11,y11-H2O,b13,y12,b14,y13,b15,	343.161206,375.235041,506.224536,488.213972,522.303451,691.340956,692.408971,806.367896,821.451561,921.394836,903.384272,936.478501,1050.437426,1051.505441,1034.478892,1108.526901,1236.621861,1218.611296,1367.611356,1399.685191,1480.695416,1496.737951,1567.727446,	5209	0	36.5	GSTPYKGDDEGIFISR	2	1741.84	117.388	577	NA	NA	NA	0	1	0	0	1048	50.2036	117.388	10418	40.5023	76.8855	1.04021034804836e-05	2	2496
46	26	NA	NA	NA	b3,y3,b4,y4,b5,y5,y6,b7,y7,b8,y8,y9,b11,y12,y14,y15,b8(2+),y9(2+),y10(2+),b12(2+),y17(2+),y18(2+),y19(2+),y20(2+),y21(2+),y22(2+),	284.196856,346.183341,397.280916,417.220451,494.333676,516.288861,631.315801,720.429026,744.399861,833.513086,843.468271,980.527181,1142.656786,1323.701511,1561.808101,1632.845211,833.513086,980.527181,1093.611241,1243.704466,1874.971861,1972.024621,2069.077381,2182.161441,2281.229851,2352.266961,	9230	0	51.06	LAVLPPELAHTTELHVLDVAGNR	3	2465.35	141.293	577	NA	NA	NA	0	0	0	0	835	49.2169	141.293	18460	37.7494	103.544	1.14382660755454e-05	2	2501
46	26	NA	NA	NA	b2,b3,y3,y3,b4,b4-H2O,y4,y5,b5,y6,y6-H2O,b6,y7,y7-H2O,b7,b8,b8-H2O,b9,b9-H2O,y11,y11-NH3,b11,b11,y12,y12-H2O,y14,b7(2+),b8(2+),y13(2+),y14(2+),b14(2+),y15(2+),y16(2+),	187.107716,286.176126,347.192501,347.192501,399.260186,381.249622,418.229611,489.266721,527.318766,618.309311,600.298746,674.387176,747.351901,729.341336,787.471236,916.513826,898.503262,987.550936,969.540372,1177.485481,1160.458932,1197.687756,1197.687756,1234.506941,1216.496376,1444.643761,787.471236,916.513826,1347.591001,1444.643761,1498.778746,1515.680871,1644.723461,	11612	0	61.47	VSVIQFLEAPIGDEDAEEAAAEK	4	2431.19	141.293	577	NA	NA	NA	0	0	0	0	1572	51.9645	141.293	23224	44.5975	96.6956	1.14382660755454e-05	2	2502
74	26	1.000000,	NA	NA	b4,b5,y6,b7,y7,b8,b9,b10,b11,b12,b12-NH3,b15,b17,y19,b11(2+),b13(2+),y15(2+),y16(2+),y21(2+),b22(2+),y22(2+),y23(2+),y24(2+),y25(2+),y26(2+),y27(2+),b32(2+),	436.255436,565.298026,697.378001,735.403546,834.436911,834.471956,905.509066,1018.593126,1131.677186,1259.735766,1242.709217,1591.851211,1803.930911,1960.967701,1131.677186,1316.757226,1636.787961,1707.825071,2147.031751,2243.137591,2262.058691,2359.111451,2487.170031,2634.205436,2691.226896,2819.285476,3253.584661,	11100	0	59.02	LPQPEAVVALLQGMQPDGEGPVAPGGWHNGPHAPWAPR	4	3949.96	82.8216	577	Met_OX(1)	NA	NA	1	0	0	0	1288	51.0992	82.8216	22200	43.7673	39.0544	0.00116658	10	3288
20	16	NA	NA	NA	b2,b3,b3-H2O,y2,b4,y3,y3-NH3,b5,b5-H2O,y4,b7,y5,y5-H2O,y5-NH3,y6,b8,y7,y7-H2O,y7-NH3,y8,y8-H2O,y8-NH3,y9,y9-H2O,b10,b10-H2O,y10,y10-H2O,	187.107716,300.191776,282.181212,303.213911,399.260186,416.297971,399.271422,456.281646,438.271082,531.324911,642.345696,646.351851,628.341286,629.325302,717.388961,757.372636,774.410421,756.399856,757.383872,873.478831,855.468266,856.452282,986.562891,968.552326,1026.557806,1008.547242,1073.594921,1055.584356,	4082	0	32.58	VSLVGADDLRK	2	1172.66	124.863	577	NA	NA	NA	0	1	0	0	449	46.5225	124.863	8164	46.8021	78.0611	1.32576746661193e-05	3	2520
75	26	1.000000,	NA	NA	y5,b7,y7,b8,b9,b10,b11,y11,b12,y13,y13-NH3,b15,y15,y15-NH3,b17,y17,b11(2+),y15(2+),y17(2+),y18(2+),y20(2+),b21(2+),y21(2+),y22(2+),y23(2+),y25(2+),y26(2+),b35(2+),	626.340891,735.403546,834.436911,834.471956,905.509066,1018.593126,1131.677186,1239.612971,1259.735766,1482.713741,1465.687192,1591.851211,1636.787961,1619.761412,1803.930911,1806.893481,1131.677186,1636.787961,1806.893481,1903.946241,2090.010291,2144.069181,2147.031751,2262.058691,2359.111451,2634.205436,2691.226896,3607.753841,	10469	0	56.08	LPQPEAVVALLQGMQPDGEGPVAPGGWHNGPHAPWAPR	4	3949.96	81.4088	577	Met_OX(1)	NA	NA	1	0	0	0	1308	51.1661	81.4088	20938	35.1823	46.2265	0.00157102	11	3399
76	26	1.000000,	NA	NA	y5,y6,b7,b7-H2O,y7,b8,b9,b10,b11,b12,b12-H2O,b12-NH3,b13,y12,y13,y13-NH3,b15,b9(2+),b10(2+),b11(2+),y11(2+),b13(2+),y15(2+),y16(2+),y18(2+),y22(2+),y23(2+),y24(2+),y25(2+),y26(2+),	626.340891,697.378001,735.403546,717.392982,834.436911,834.471956,905.509066,1018.593126,1131.677186,1259.735766,1241.725202,1242.709217,1316.757226,1425.692281,1482.713741,1465.687192,1591.851211,905.509066,1018.593126,1131.677186,1239.612971,1316.757226,1636.787961,1707.825071,1903.946241,2262.058691,2359.111451,2487.170031,2634.205436,2691.226896,	11421	0	60.56	LPQPEAVVALLQGMQPDGEGPVAPGGWHNGPHAPWAPR	4	3949.95	80.0262	577	Met_OX(1)	NA	NA	1	0	0	0	1277	51.0619	80.0262	22842	42.8878	37.1383	0.00207802	11	3426
75	24	0.959925,0.033747,0.006328,	NA	NA	b3,b3-NH3,y3,y4,b5,y5,b6,y6,y6-NH3,b8,y8,b10,y10,y10-NH3,y11,b12,b14,y14,b15,y15,y16,b18,b7(2+),y7(2+),b8(2+),b9(2+),b10(2+),b11(2+),b13(2+),b15(2+),y15(2+),y21(2+),b21(2+),y23(2+),y24(2+),	339.202676,322.176127,343.208821,529.288131,565.298026,626.340891,658.317079,697.378001,680.351452,856.453899,931.489671,1018.593126,1102.554061,1085.527512,1239.612971,1281.717709,1447.797716,1539.735201,1597.838239,1636.787961,1707.825071,1844.957456,757.385489,834.436911,834.471956,905.509066,1018.593126,1153.659129,1316.757226,1597.838239,1636.787961,2147.031751,2150.056209,2359.111451,2487.1…	11470	0	60.8	LPQPEAVVALLQGMQPDGEGPVAPGGWHNGPHAPWAPR	4	3955.95	68.1275	577	Sodium adduct(1)	NA	NA	1	0	0	0	1194	50.77	68.1275	22940	30.1724	37.9551	0.0142942	24	3830
75	24	0.001193,0.033922,0.964886,	NA	NA	y3,b5,y5,y6,y6-NH3,b7,y7,b8,b9,b10,b11,b12,b14,b14,b14-NH3,b15,b17,b17-H2O,b10(2+),b11(2+),b11(2+),b12(2+),b13(2+),y22(2+),y24(2+),y26(2+),y27(2+),y28(2+),b33(2+),b35(2+),	343.208821,565.298026,626.340891,697.378001,680.351452,735.403546,834.436911,834.471956,905.509066,1018.593126,1131.677186,1259.735766,1430.771167,1447.797716,1430.771167,1558.829747,1770.909447,1752.898883,1018.593126,1114.650637,1131.677186,1242.709217,1316.757226,2262.058691,2470.143482,2658.205432,2786.264012,2899.348072,3291.600307,3574.732377,	11639	0	61.6	LPQPEAVVALLQGMQPDGEGPVAPGGWHNGPHAPWAPR	4	3916.94	68.1275	577	Pyro-glu from Q(1)	NA	NA	1	0	0	0	1271	51.0415	68.1275	23278	45.5865	22.541	0.0142942	24	3831
30	19	NA	NA	NA	y2,y3,y3-NH3,y4,y4-H2O,y4-NH3,b5,y5,y6,b7,y7,y7-NH3,y8,y9,b10,b10-H2O,b10-NH3,y10,y10-H2O,y10-NH3,b11,b11-NH3,y11,b12,b12-H2O,b12-NH3,y12,b13,b13-NH3,b15,y14,y14-H2O,	246.156061,343.208821,326.182272,472.251411,454.240846,455.224862,506.224526,585.335471,698.419531,705.320216,811.503591,794.477042,925.546521,1039.589451,1046.490136,1028.479572,1029.463587,1110.626561,1092.615996,1093.600012,1159.574196,1142.547647,1238.685141,1272.658256,1254.647692,1255.631707,1353.712081,1401.700846,1384.674297,1569.790716,1587.812521,1569.801956,	8447	0	48.1	GVSFDQANNLLIEPAR	2	1743.91	117.388	577	NA	NA	NA	0	0	0	0	1044	50.187	117.388	16894	40.5023	76.8855	1.53175935483478e-05	3	2551
40	21	NA	NA	NA	y4,b4,b4-H2O,b4-NH3,y5,b6,y7,y8,b8,y9,y9-H2O,y10,y11,y12,y12-H2O,y12-NH3,b11,b11-H2O,b11-NH3,b12,y13,y13-H2O,y13-NH3,y14,b14,b14-H2O,b14-NH3,b15,b15-NH3,y16,y17,b17,b17-H2O,b17-NH3,b18,b18-H2O,b18-NH3,	374.214631,500.271476,482.260912,483.244927,503.257221,654.345696,675.342011,804.384601,883.451956,901.437361,883.426796,958.458821,1144.538131,1281.597041,1263.586476,1264.570492,1319.674236,1301.663672,1302.647687,1376.695696,1394.681101,1376.670536,1377.654552,1495.728781,1602.791046,1584.780482,1585.764497,1673.828156,1656.801607,1680.808821,1777.861581,1903.918426,1885.907862,1886.891877,197…	5128	0	36.22	EKELPGQTLHWGPEATEAAGR	2	2277.12	107.078	577	NA	NA	NA	0	1	0	0	1541	51.878	107.078	10256	34.9526	72.1256	1.8754822685157e-05	3	2598
56	26	NA	NA	NA	y2,y3,y3-NH3,y4,y4-H2O,y4-NH3,b5,y5,b6,b6-H2O,b7,y6,y6-H2O,y6-NH3,y7,b9,b10,b10-NH3,b11,b11-NH3,y10,b12,b13,b13-H2O,b13-NH3,b11(2+),b12(2+),y15(2+),y16(2+),y17(2+),y18(2+),b20(2+),b21(2+),b22(2+),b24(2+),b25(2+),	288.203011,401.287071,384.260522,502.334751,484.324186,485.308202,506.224526,615.418811,634.283106,616.272542,705.320216,716.466491,698.455926,699.439942,829.550551,933.406076,1046.490136,1029.463587,1159.574196,1142.547647,1216.678321,1272.658256,1401.700846,1383.690282,1384.674297,1159.574196,1272.658256,1782.995951,1912.038541,2025.122601,2138.206661,2226.103656,2355.146246,2468.230306,2682.36…	13029	0	68.58	GVSFDQANNLLIEPARIEEEELTLTILR	4	3183.7	114.935	577	NA	NA	NA	0	1	0	0	942	49.7405	114.935	26058	63.9085	51.0263	1.96870292227776e-05	3	2607
56	26	NA	NA	NA	y4,y5,b7,b7-H2O,y6,y7,y8,b10,b10-NH3,y9,y9-H2O,y9-NH3,b11,b11-H2O,y10,b12,b12-NH3,y11,b13,b13-NH3,y5(2+),y9(2+),y13(2+),y15(2+),y16(2+),y17(2+),y18(2+),y20(2+),y21(2+),y22(2+),y23(2+),y24(2+),y26(2+),	502.334751,615.418811,705.320216,687.309652,716.466491,829.550551,958.593141,1046.490136,1029.463587,1087.635731,1069.625166,1070.609182,1159.574196,1141.563632,1216.678321,1272.658256,1255.631707,1345.720911,1401.700846,1384.674297,615.418811,1087.635731,1614.906081,1782.995951,1912.038541,2025.122601,2138.206661,2365.333651,2479.376581,2550.413691,2678.472271,2793.499211,3027.599651,	15009	0	81.07	GVSFDQANNLLIEPARIEEEELTLTILR	3	3183.7	114.935	577	NA	NA	NA	0	1	0	0	964	49.8408	114.935	30018	40.8297	74.105	1.96870292227776e-05	3	2608
74	23	0.136364,0.727273,0.136364,	NA	NA	b3,y5,b6,y6,y6-NH3,b7,b9,y8,b10,y10,y10-NH3,b11,b12,b12,b13,b13,b13-H2O,b13-NH3,b14,b15,y15,b13(2+),b14(2+),y15(2+),b17(2+),y18(2+),y21(2+),y23(2+),y23(2+),y24(2+),y25(2+),y26(2+),y29(2+),y30(2+),b31(2+),	339.202676,626.340891,636.335136,697.378001,680.351452,735.403546,905.509066,931.489671,1018.593126,1102.554061,1085.527512,1131.677186,1259.735766,1281.717709,1316.757226,1338.739169,1320.728605,1321.712620,1469.779659,1597.838239,1636.787961,1316.757226,1469.779659,1636.787961,1809.917939,1903.946241,2147.031751,2359.111451,2381.093394,2487.170031,2640.192464,2675.231981,3051.440624,3122.477734…	11547	0	61.16	LPQPEAVVALLQGMQPDGEGPVAPGGWHNGPHAPWAPR	4	3955.94	63.0253	577	Sodium adduct(1)	NA	NA	1	0	0	0	1181	50.7225	63.0253	23094	35.2246	27.8008	0.0250979	27	4011
26	18	NA	NA	NA	b2,y2,b3,b4,b5,b5-H2O,b5-NH3,b6,b6-H2O,b6-NH3,y7,b8,y8,y8-NH3,b9,y9,b10,y10,b11,y11,y11-NH3,b12,y12,y12-H2O,b13,b13-H2O,b13-NH3,	243.108786,288.203011,356.192846,443.224876,514.261986,496.251422,497.235437,627.346046,609.335482,610.319497,798.446811,821.451566,895.499571,878.473022,950.494156,1008.583631,1063.578216,1079.620741,1120.599676,1166.652771,1149.626222,1234.642606,1279.736831,1261.726266,1347.726666,1329.716102,1330.700117,	8664	0	48.92	NQLSALPPELGNLR	2	1521.84	121.517	577	NA	NA	NA	0	0	0	0	754	48.7737	121.517	17328	51.4564	70.0603	2.2831497440052e-05	4	2622
26	18	NA	NA	NA	b2,b2-NH3,y2,b3,b3-NH3,b4,y4,b5,b5-H2O,b5-NH3,y5,b6,b6-H2O,b6-NH3,y7,y8,y9,b10,y10,b11,y11,y11-NH3,b12,y12,b13,b13-H2O,	243.108786,226.082237,288.203011,356.192846,339.166297,443.224876,459.267401,514.261986,496.251422,497.235437,572.351461,627.346046,609.335482,610.319497,798.446811,895.499571,1008.583631,1063.578216,1079.620741,1120.599676,1166.652771,1149.626222,1234.642606,1279.736831,1347.726666,1329.716102,	8780	0	49.33	NQLSALPPELGNLR	2	1521.84	121.517	577	NA	NA	NA	0	0	0	0	741	48.6982	121.517	17560	42.2287	79.2879	2.2831497440052e-05	4	2624
76	32	NA	NA	NA	b3,y5,b6,y6,b7,y7,b8,b9,b10,y10,b11,b12,b13,b15,b15-H2O,b15-NH3,y15,y15-NH3,y19,b19,b9(2+),b10(2+),y11(2+),b13(2+),b15(2+),y15(2+),y16(2+),y18(2+),y20(2+),y21(2+),y22(2+),b23(2+),y23(2+),y24(2+),y26(2+),	339.202676,626.340891,636.335136,697.378001,735.403546,834.436911,834.471956,905.509066,1018.593126,1102.554061,1131.677186,1259.735766,1316.757226,1575.856296,1557.845732,1558.829747,1636.787961,1619.761412,1960.967701,1974.000046,905.509066,1018.593126,1239.612971,1316.757226,1575.856296,1636.787961,1707.825071,1903.946241,2090.010291,2147.031751,2262.058691,2298.179786,2359.111451,2487.170031,…	11414	0	60.52	LPQPEAVVALLQGMQPDGEGPVAPGGWHNGPHAPWAPR	4	3933.97	125.137	577	NA	NA	NA	0	0	0	0	1264	51.0175	125.137	22828	48.3632	76.7737	2.31054949456718e-05	4	2635
56	20	NA	NA	NA	y6,b7,y7,b8,b8-H2O,y9,y9-NH3,b10,y10,y10-H2O,y11,b12,b12-H2O,y12,b13,b14,y13,y13-NH3,y15,y15-NH3,b17,b17-H2O,y17,b18,b18-H2O,b19,y19,b20,b20-H2O,	604.304911,666.345696,705.352591,737.382806,719.372242,930.463931,913.437382,935.483246,987.485391,969.474826,1100.569451,1119.568036,1101.557472,1215.596391,1216.620796,1317.668476,1344.638981,1327.612432,1540.760151,1523.733602,1642.832236,1624.821672,1738.860591,1757.859176,1739.848612,1870.943236,1922.945381,1927.964696,1909.954132,	5795	0	38.64	LAEAPSPAPTPSPTPVEDLGPQTSTSPGR	2	2857.42	66.6192	577	NA	NA	NA	0	0	0	0	1588	52.0085	66.6192	11590	19.8904	46.7288	2.53276646348896e-05	4	2640
42	23	NA	NA	NA	b2,b2-H2O,y4,b3,b3-H2O,b4,b4-H2O,b4-NH3,y6,y7,y9,y10,b10,b10-H2O,y11,y12,y14,y9(2+),b10(2+),y11(2+),y12(2+),b11(2+),b12(2+),y14(2+),y16(2+),y17(2+),y18(2+),y19(2+),	258.144826,240.134262,374.214631,387.187416,369.176852,500.271476,482.260912,483.244927,604.304901,675.342011,901.437361,958.458821,1133.594926,1115.584362,1144.538131,1281.597041,1495.728781,901.437361,1133.594926,1144.538131,1281.597041,1319.674236,1376.695696,1495.728781,1680.808821,1777.861581,1890.945641,2019.988231,	5216	0	36.54	EKELPGQTLHWGPEATEAAGR	3	2277.13	121.797	577	NA	NA	NA	0	1	0	0	1543	51.8837	121.797	10432	50.2968	71.4999	2.69570528596003e-05	4	2646
26	20	NA	NA	NA	y1,b2,y2,b3,y3,y4,y5,b5,y6,y6-H2O,b6,b7,b7-H2O,b8,b8-H2O,y8,y8-H2O,y8-NH3,y4(2+),y5(2+),b5(2+),y6(2+),b6(2+),b7(2+),b9(2+),	175.118951,243.133926,288.203011,372.176516,401.287071,502.334751,615.418811,630.261696,716.466491,698.455926,743.345756,844.393436,826.382872,957.477496,939.466932,958.593141,940.582576,941.566592,502.334751,615.418811,630.261696,716.466491,743.345756,844.393436,1058.525176,	9563	0	52.4	IEEEELTLTILR	3	1458.8	148.985	577	NA	NA	NA	0	0	0	0	624	47.9518	148.985	19126	53.6792	95.3054	2.73636260864599e-05	4	2651
47	24	NA	NA	NA	b2,b3,b3-H2O,y2,y2-NH3,b4,b5,b6,b6-NH3,b7,b8,b8-H2O,b8-NH3,b9,b9-H2O,b9-NH3,b10,b7(2+),b8(2+),b9(2+),b10(2+),b11(2+),y12(2+),y13(2+),y14(2+),y15(2+),y16(2+),y17(2+),y18(2+),y19(2+),y20(2+),	187.107716,286.176126,268.165562,303.213911,286.187362,399.260186,527.318766,674.387176,657.360627,787.471236,916.513826,898.503262,899.487277,987.550936,969.540372,970.524387,1084.603696,787.471236,916.513826,987.550936,1084.603696,1197.687756,1333.586591,1390.608051,1503.692111,1600.744871,1671.781981,1800.824571,1913.908631,2060.977041,2189.035621,	10800	0	57.71	VSVIQFLEAPIGDEDAEEAAAEKR	4	2587.29	117.986	577	NA	NA	NA	0	1	0	0	1482	51.7085	117.986	21600	44.5975	73.3881	3.06166582340178e-05	4	2656
36	23	NA	NA	NA	y1,y2,y3,y3-NH3,y4,b5,y5,b6,b6-H2O,y6,y6-H2O,b7,y7,b8,b10,b11,b11-NH3,b12,y3(2+),b6(2+),b7(2+),b10(2+),y10(2+),b11(2+),b12(2+),b13(2+),b16(2+),	175.118951,262.150981,361.219391,344.192842,476.246331,536.307856,589.330391,607.344966,589.334402,718.372981,700.362416,721.387896,817.441391,868.456306,1127.555376,1240.639436,1223.612887,1339.707846,361.219391,607.344966,721.387896,1127.555376,1189.624521,1240.639436,1339.707846,1468.750436,1795.929846,	13799	0	72.93	LPPEVANFMQLVELDVSR	4	2057.08	142.043	577	NA	NA	NA	0	0	0	0	1156	50.6296	142.043	27598	44.8204	97.2229	3.17730113261556e-05	4	2662
36	23	NA	NA	NA	y2,y3,y3-H2O,y4,b5,y5,y5-H2O,y6,b7,y7,b8,y8,y8,b9,y9,b10,b10-NH3,b11,b11-NH3,b12,b7(2+),y8(2+),b10(2+),b11(2+),b12(2+),b14(2+),b17(2+),	262.150981,361.219391,343.208826,476.246331,536.307856,589.330391,571.319826,718.372981,721.387896,817.441391,868.456306,930.525451,930.525451,999.496796,1058.584031,1127.555376,1110.528827,1240.639436,1223.612887,1339.707846,721.387896,930.525451,1127.555376,1240.639436,1339.707846,1581.834496,1882.961876,	14193	0	75.27	LPPEVANFMQLVELDVSR	3	2057.08	142.043	577	NA	NA	NA	0	0	0	0	1153	50.6183	142.043	28386	93.4674	48.5759	3.17730113261556e-05	4	2663
54	20	NA	NA	NA	y4,y6,y7,y8,y8-H2O,b8,b9,y9,y10,y10-NH3,b11,y11,y11-H2O,y11-NH3,b12,y12,y12-H2O,y12-NH3,b13,b13-H2O,b13-NH3,b14,b14-NH3,y14,b15,b15-H2O,y15,y15-H2O,b16,b16-NH3,b17,b17-H2O,b17-NH3,y17,	460.251421,644.336211,731.368241,802.405351,784.394786,813.435236,870.456696,988.484661,1085.537421,1068.510872,1128.541876,1182.590181,1164.579616,1165.563632,1257.584466,1310.648761,1292.638196,1293.622212,1385.643046,1367.632482,1368.616497,1514.685636,1497.659087,1554.718291,1629.712576,1611.702012,1683.760881,1665.750316,1758.755166,1741.728617,1886.813746,1868.803182,1869.787197,1940.862051,	8156	0	47.08	LALDGETLGEEEQEDEQPPWASPSPTSR	2	3068.4	69.6405	577	NA	NA	NA	0	0	0	0	930	49.6848	69.6405	16312	17.2707	52.3698	3.63507048473448e-05	4	2670
18	15	NA	NA	NA	y1,b2,b3,b3-NH3,b4,y4,b5,b5-H2O,y5,b6,b7,y6,y6-H2O,y7,y7-H2O,y7-NH3,b8,y8,y8-H2O,y8-NH3,b9,y9,y9-NH3,	175.118951,197.128446,325.187026,308.160477,396.224136,497.319431,525.266726,507.256162,554.340891,582.288186,679.340946,683.383481,665.372916,754.420591,736.410026,737.394042,776.393706,882.479171,864.468606,865.452622,904.488666,979.531931,962.505382,	766	0	19.49	VPQAEGPPKR	2	1078.6	122.165	577	NA	NA	NA	0	1	0	0	520	47.16	122.165	1532	37.6081	84.557	4.14928136310717e-05	4	2681
18	15	NA	NA	NA	b1,y2,y2-NH3,b2,b2-NH3,y4,b4,b5,y5,y5-NH3,y6,b6,b6-NH3,b7,y7,y8,y8-H2O,y8-NH3,b8,b8-H2O,b8-NH3,y9,y9-H2O,y9-NH3,b9,	157.108386,260.196861,243.170312,270.192446,253.165897,445.276901,482.272146,539.293606,558.360961,541.334412,615.382421,652.377666,635.351117,709.399126,730.409361,827.462121,809.451556,810.435572,837.457706,819.447142,820.431157,940.546181,922.535616,923.519632,950.541766,	4570	0	34.27	RLPDGIGQLK	2	1096.65	122.165	577	NA	NA	NA	0	1	0	0	326	45.1322	122.165	9140	42.1236	80.0415	4.14928136310717e-05	4	2689
44	25	NA	NA	NA	y2,b3,b4,y4,b6,b6-NH3,y6,y8,y8-NH3,y9,y10,y12,y13,b18,y10(2+),b10(2+),y11(2+),y12(2+),y13(2+),y14(2+),b14(2+),b15(2+),y16(2+),y17(2+),y18(2+),y19(2+),y20(2+),	288.203011,356.217986,455.286396,529.345651,697.387906,680.361357,699.451171,885.515221,868.488672,1022.574131,1123.621811,1293.727331,1406.811391,1903.028316,1123.621811,1138.646636,1236.705871,1293.727331,1406.811391,1519.895451,1546.858746,1603.880206,1734.986061,1863.044641,1977.087571,2076.155981,2205.198571,	10854	0	57.93	LLEVNQQSLLGLTHGEAVQLLR	3	2431.36	136.84	577	NA	NA	NA	0	0	0	0	593	47.7305	136.84	21708	46.0328	90.8077	4.21744057638299e-05	5	2697
62	29	NA	NA	NA	y2,y2-NH3,b4,b4-H2O,y3,y4,y5,y6,y7,y8,y9,b10,b11,b11-H2O,y12,b13,b13-H2O,b13-NH3,y13,y13-H2O,y13-NH3,b14,b14-H2O,b15,b15-NH3,b11(2+),b13(2+),b14(2+),b15(2+),y16(2+),y17(2+),y18(2+),b21(2+),b22(2+),b23(2+),b26(2+),b27(2+),b29(2+),	288.203011,271.176462,409.219386,391.208822,417.245601,530.329661,631.377341,730.445751,843.529811,957.572741,1028.609851,1034.562896,1121.594926,1103.584362,1312.758301,1362.737566,1344.727002,1345.711017,1411.826711,1393.816146,1394.800162,1433.774676,1415.764112,1546.858736,1529.832187,1121.594926,1362.737566,1433.774676,1546.858736,1680.927871,1794.011931,1865.049041,2086.092696,2199.176756,2…	14132	0	74.9	SLAHLALNDVSLQALPGDVGNLANLVTLELR	4	3226.79	128.412	577	NA	NA	NA	0	0	0	0	529	47.2346	128.412	28264	40.2243	88.1879	4.27398312894662e-05	5	2701
31	22	1.000000,0.000000,0.000000,	NA	NA	b2,b2-NH3,b3,b3-H2O,y3,y3-NH3,y4,y5,y6,y6-H2O,y7,y8,y9,y10,b11,y5(2+),y6(2+),y7(2+),y8(2+),y9(2+),y10(2+),y11(2+),b12(2+),b12(2+),y12(2+),b13(2+),y13(2+),	242.149916,225.123367,357.176861,339.166297,374.239791,357.213242,487.323851,624.382761,725.430441,707.419876,838.514501,909.551611,1056.620021,1153.672781,1249.693911,624.382761,725.430441,838.514501,909.551611,1056.620021,1153.672781,1266.756841,1335.741926,1363.736841,1381.783786,1476.820901,1509.842366,	10093	0	54.54	LQSLPFALTHLNLK	3	1622.92	150.882	577	Formylation(1)	NA	NA	1	0	0	0	480	46.8124	150.882	20186	67.9026	82.9789	3.22516836703185e-10	0	1328
56	28	0.136364,0.727273,0.136364,	NA	NA	b2,y2,y2-NH3,b3,b3-H2O,b3-NH3,b4,b4-H2O,b4-NH3,y4,y4-NH3,y5,y6,y6-NH3,y7,y8,b9,b9-NH3,y9,y9-H2O,y10,y11,b12,y12,b13,y13,y4(2+),b10(2+),y11(2+),b13(2+),b12(2+),b16(2+),b17(2+),b18(2+),b19(2+),y19(2+),b20(2+),y21(2+),b22(2+),	242.149916,288.203011,271.176462,329.181946,311.171382,312.155397,442.266006,424.255442,425.239457,516.296261,499.269712,644.354841,715.391951,698.365402,843.450531,957.493461,1085.598953,1068.572404,1086.536051,1068.525486,1157.573161,1270.657221,1449.784853,1456.736531,1562.868913,1569.820591,516.296261,1108.614936,1270.657221,1448.825986,1449.784853,1875.085043,2061.164353,2174.248413,2245.285…	12487	0	65.76	LQSLPFALTHLNLKALWLAENQAQPMLR	4	3330.81	133.488	577	ubiquitinylation residue(1)	NA	NA	1	1	0	0	671	48.2672	133.488	24974	48.3632	85.1243	7.30410664517736e-09	0	1615
24	16	1.000000,	NA	NA	b2,b2-NH3,b3,b3-NH3,y3,y3-H2O,y3-NH3,y4,b4,y5,b5,b5*,y6,y6-H2O,y6-NH3,b7,b7-H2O,b7*,y8,b8,b8-NH3,b8*,y9,y9-H2O,y9-NH3,y9*,b10,b10-H2O,b10*,b11,y11,y11*,b12,b12*,	270.192446,253.165897,369.260856,352.234307,401.214301,383.203736,384.187752,472.251411,497.319436,569.304171,664.317797,566.322527,666.356931,648.346366,649.330382,890.413147,872.402583,792.417877,892.452281,987.465907,970.439358,889.470637,1059.450642,1041.440077,1042.424093,961.455372,1155.555777,1137.545213,1057.560507,1252.608537,1286.577632,1188.582362,1381.651127,1283.655857,	3051	0	28.85	LRVQSPEPPAPER	2	1555.76	104.764	577	Phosphorylation(1)	NA	NA	1	1	0	0	899	49.5376	104.764	6102	46.8354	57.9285	1.38090016359655e-05	3	2535
44	20	NA	NA	NA	y5,b5,b6,b6-H2O,y7,b7,b7-H2O,y8,y8-H2O,b8,b8-H2O,y9,y9-NH3,b9,b9-H2O,b9-NH3,y10,b11,y12,y13,y14,y14-H2O,b14,y15,y15-NH3,y16,y16-H2O,y16-NH3,b16,b16-H2O,y17,y18,y18-H2O,	489.266721,527.318766,674.387176,656.376612,747.351901,787.471236,769.460672,818.389011,800.378446,916.513826,898.503262,933.415951,916.389402,987.550936,969.540372,970.524387,1062.458541,1197.687756,1234.506941,1347.591001,1444.643761,1426.633196,1498.778746,1515.680871,1498.654322,1644.723461,1626.712896,1627.696912,1684.842796,1666.832232,1757.807521,1904.875931,1886.865366,	11737	0	62.06	VSVIQFLEAPIGDEDAEEAAAEK	2	2431.19	87.9419	577	NA	NA	NA	0	0	0	0	1513	51.7984	87.9419	23474	39.0388	48.903	6.78477043180838e-05	5	2730
20	16	NA	NA	NA	b2,y2,b3,b3-H2O,y3,b4,b4-H2O,b5,b5-H2O,y4,b6,b6-H2O,y5,b7,b7-H2O,y6,y7,y8,b9,b9-H2O,y9,b10,b10-H2O,	201.123366,246.181211,298.176126,280.165562,359.265271,369.213236,351.202672,456.245266,438.234702,506.333681,569.329326,551.318762,593.365711,656.361356,638.350792,706.449771,793.481801,864.518911,916.513826,898.503262,961.571671,1015.582236,997.571672,	9981	0	54.11	SLPASLSFLVK	2	1161.69	124.863	577	NA	NA	NA	0	0	0	0	319	45.0379	124.863	19962	32.9711	91.8921	6.90515813484013e-05	5	2777
26	16	1.000000,	NA	NA	y1,y1-NH3,b2,y3,y3-H2O,b4,b4-NH3,y5,y6,b6,b7,b7-NH3,b7*,y8,y8-H2O,y3(2+),y5(2+),b5(2+),y6(2+),b7(2+),b8(2+),b10(2+),	175.118951,158.092402,270.192446,401.214301,383.203736,497.319436,480.292887,569.304171,666.356931,761.370557,890.413147,873.386598,792.417877,892.452281,874.441716,401.214301,569.304171,664.317797,666.356931,890.413147,987.465907,1155.555777,	2899	0	28.25	LRVQSPEPPAPER	3	1555.76	97.0329	577	Phosphorylation(1)	NA	NA	1	1	0	0	910	49.5904	97.0329	5798	39.3241	57.7088	0.0681492	39	4355
54	25	NA	NA	NA	b4,y3,y3-NH3,y4,y5,b7,b7-H2O,b7-NH3,y6,y7,y8,b10,b10-NH3,y10,y10-H2O,b12,b12-NH3,b13,b13-NH3,y12,b15,y14,b16,b9(2+),y13(2+),y16(2+),y17(2+),y18(2+),y19(2+),y21(2+),y23(2+),y26(2+),	391.197586,401.287071,384.260522,502.334751,615.418811,705.320216,687.309652,688.293667,716.466491,829.550551,958.593141,1046.490136,1029.463587,1216.678321,1198.667756,1272.658256,1255.631707,1401.700846,1384.674297,1458.804971,1569.790716,1685.943191,1725.891826,933.406076,1614.906081,1912.038541,2025.122601,2138.206661,2251.290721,2479.376581,2678.472271,3027.599651,	13704	0	72.42	GVSFDQANNLLIEPARIEEEELTLTILR	3	3183.7	110.44	577	NA	NA	NA	0	1	0	0	973	49.8811	110.44	27408	43.613	66.8267	7.25485258634551e-05	5	2791
54	25	NA	NA	NA	y3,y4,y5,b6,b6-H2O,y6,y7,y8,y9,y9-H2O,y9-NH3,b11,b11-H2O,b11-NH3,y10,b12,b12-NH3,b13,y12,y15(2+),y16(2+),y17(2+),b19(2+),y18(2+),y20(2+),y21(2+),y22(2+),y23(2+),y24(2+),y25(2+),y26(2+),	401.287071,502.334751,615.418811,634.283106,616.272542,716.466491,829.550551,958.593141,1087.635731,1069.625166,1070.609182,1159.574196,1141.563632,1142.547647,1216.678321,1272.658256,1255.631707,1401.700846,1458.804971,1782.995951,1912.038541,2025.122601,2097.061066,2138.206661,2365.333651,2479.376581,2550.413691,2678.472271,2793.499211,2940.567621,3027.599651,	14829	0	79.63	GVSFDQANNLLIEPARIEEEELTLTILR	3	3183.7	110.44	577	NA	NA	NA	0	1	0	0	953	49.7909	110.44	29658	38.1401	72.2995	7.25485258634551e-05	5	2792
22	16	0.038451,0.958687,0.959825,0.039849,0.002538,0.000516,0.000104,0.000021,0.000004,0.000004,	NA	NA	b2,b2,y2,y3,b4,b4,b4-H2O,y4,b6,b6-H2O,y5,b7,b7-H2O,y6,y6,b8,y7,y7-H2O,b8,b8-H2O,y8,y8-H2O,y8-NH3,b9,b9-H2O,y9,y9-H2O,y9-NH3,b10,b10-H2O,y10,y10-NH3,y10,y10-H2O,y10-NH3,b11,y11,y11-H2O,y11-NH3,	201.123366,229.154666,262.150981,377.177921,401.203066,429.234366,411.223802,506.220511,573.287856,555.277292,593.252541,686.371916,668.361352,706.336601,720.352251,745.372646,763.358061,745.347496,773.403946,755.393382,850.390091,832.379526,833.363542,902.446536,884.435972,979.432681,961.422116,962.406132,1017.473476,999.462912,1064.485441,1047.458892,1078.501091,1060.490526,1061.474542,1104.505…	4161	0	32.84	LSAESGLSEDSR	2	1278.62	113.845	577	Methylation(2)	NA	NA	2	0	0	0	662	48.2086	113.845	8322	42.2287	71.6163	6.43209236414811e-06	2	2398
79	32	NA	NA	NA	y3,y5,y6,y6-NH3,b7,y7,b8,b9,b9-H2O,y9,b10,b11,b12,b12-NH3,b14,b15,b15-H2O,b15-NH3,y15,y16,b17,b17-NH3,b19,y7(2+),b8(2+),b9(2+),y9(2+),b10(2+),b12(2+),b13(2+),b15(2+),y16(2+),y20(2+),y21(2+),y22(2+),y23(2+),y25(2+),y36(2+),	343.208821,626.340891,697.378001,680.351452,735.403546,834.436911,834.471956,905.509066,887.498502,988.511131,1018.593126,1131.677186,1259.735766,1242.709217,1447.797716,1575.856296,1557.845732,1558.829747,1636.787961,1707.825071,1787.935996,1770.909447,1974.000046,834.436911,834.471956,905.509066,988.511131,1018.593126,1259.735766,1316.757226,1575.856296,1707.825071,2090.010291,2147.031751,2262.…	11636	0	61.6	LPQPEAVVALLQGMQPDGEGPVAPGGWHNGPHAPWAPR	4	3933.96	119.577	577	NA	NA	NA	0	0	0	0	1250	50.9691	119.577	23272	38.6158	80.9615	8.42159007431687e-05	5	2802
34	19	NA	NA	NA	y3,b4,y4,y4-NH3,b5,y5,y5-H2O,b6,b6-H2O,y6,y7,y8,y9,y10,b11,b11-NH3,b12,y12,y13,y13-NH3,b14,y14,b15,y16,	361.219391,437.239446,476.246331,459.219782,536.307856,589.330391,571.319826,607.344966,589.334402,718.372981,817.441391,930.525451,1058.584031,1189.624521,1240.639436,1223.612887,1339.707846,1450.735861,1521.772971,1504.746422,1581.834496,1620.841381,1696.861436,1846.936731,	14604	0	77.99	LPPEVANFMQLVELDVSR	2	2057.08	103.804	577	NA	NA	NA	0	0	0	0	1137	50.5576	103.804	29208	23.053	80.7509	0.00010262	6	2848
52	20	0.000037,0.000037,0.000037,0.157877,0.842013,	NA	NA	b4,y5,y6,b7,b7-H2O,y7,b7,b7*,b8,b8-H2O,y8,b9,b9-H2O,y9,y9-H2O,y9-NH3,y10,b11,b11-H2O,b11-NH3,y10,b11,b11-H2O,b11*,b11,b11-H2O,b11*,b12,b12-H2O,b12-NH3,y11,y12,y12-H2O,y12-NH3,b12,b12-NH3,b12*,y12,y12-H2O,y12*,b14,y13,y13*,b15,b15-H2O,b15-NH3,y14,y15,y15-H2O,y15-NH3,b15,b15-H2O,b15-NH3,b15*,y15,y15-H2O,y15-NH3,y15*,b18,b18-H2O,y18,	499.125827,528.314011,641.398071,706.253476,688.242912,770.440661,786.219807,688.224537,803.306236,785.295672,885.467601,890.338266,872.327702,982.520361,964.509796,965.493812,1069.552391,1075.418306,1057.407742,1058.391757,1149.518722,1155.384637,1137.374073,1057.389367,1155.384637,1137.374073,1057.389367,1203.476886,1185.466322,1186.450337,1246.571482,1263.657911,1245.647346,1246.631362,1283.44…	6042	0	39.53	MAESPCSPSGQQPPSPPSPDELPANVK	2	2827.24	72.8462	577	Phosphorylation(1)	NA	NA	1	0	0	0	449	46.5225	72.8462	12084	16.7595	56.0867	0.000153893	6	2916
24	17	NA	NA	NA	y2,b2,b2-H2O,b2-NH3,y3,y4,y5,b5,b5-H2O,b5-NH3,y6,b7,b7-H2O,b7-NH3,y7,y7-H2O,y8,y9,y10,b10,b10-H2O,b10-NH3,y11,b11,b11-NH3,b12,b12-NH3,y12,y12-H2O,y12-NH3,	204.134261,230.113536,212.102972,213.086987,261.155721,332.192831,445.276891,457.240516,439.229952,440.213967,532.308921,627.346036,609.335472,610.319487,645.392981,627.382416,702.414441,815.498501,872.519961,898.499236,880.488672,881.472687,929.541421,955.520696,938.494147,1012.542156,995.515607,1030.589101,1012.578536,1013.562552,	5121	0	36.2	QTGGLGISIAGGK	2	1158.65	117.621	577	NA	NA	NA	0	0	0	0	453	46.561	117.621	10242	37.6081	80.0127	0.000121605	6	2875
24	17	NA	NA	NA	b2,y2,b3,b3-H2O,y3,b4,b4-H2O,y4,b5,y5,y6,y7,b8,b8-H2O,b8-NH3,y8,b9,b9-H2O,b9-NH3,y9,y9-NH3,y10,y10-NH3,y11,y11-H2O,y11-NH3,y12,	213.159746,246.156061,300.191776,282.181212,375.198651,413.275836,395.265272,476.246331,527.318766,575.314741,690.341681,789.410091,798.435576,780.425012,781.409027,846.431551,897.503986,879.493422,880.477437,960.474481,943.447932,1073.558541,1056.531992,1160.590571,1142.580006,1143.564022,1273.674631,	6315	0	40.52	VLSINGVDVTEAR	2	1372.74	117.621	577	NA	NA	NA	0	0	0	0	578	47.6193	117.621	12630	34.9314	82.6894	0.000121605	6	2877
24	17	NA	NA	NA	b2,b3,b4,y4,b5,y5,y6,y7,b7,b8,b8-H2O,y8,b9,b9-H2O,y9,y9-H2O,y9-NH3,b10,y10,y11,b12,	211.144096,324.228156,437.312216,442.277231,534.364976,539.329991,626.362021,755.404611,760.460326,847.492356,829.481792,852.457371,944.545116,926.534552,949.510131,931.499566,932.483582,1001.566576,1062.594191,1175.678251,1211.703396,	8143	0	47.05	LPLLPPESPGPLR	2	1385.82	117.621	577	NA	NA	NA	0	0	0	0	344	45.3656	117.621	16286	19.4873	98.1335	0.000121605	6	2882
55	25	NA	NA	NA	y3,y4,y5,y5-NH3,b6,b6-H2O,b7,b7-H2O,y6,y6-H2O,y7,y8,y9,y9-H2O,b12,b12-NH3,y11,b13,b13-NH3,y12,y13,y13-NH3,b16,b16-NH3,b10(2+),b16(2+),y15(2+),y16(2+),y17(2+),y18(2+),y19(2+),y20(2+),y22(2+),y23(2+),	401.287071,502.334751,615.418811,598.392262,634.283106,616.272542,705.320216,687.309652,716.466491,698.455926,829.550551,958.593141,1087.635731,1069.625166,1272.658256,1255.631707,1345.720911,1401.700846,1384.674297,1458.804971,1614.906081,1597.879532,1725.891826,1708.865277,1046.490136,1725.891826,1782.995951,1912.038541,2025.122601,2138.206661,2251.290721,2365.333651,2550.413691,2678.472271,	13295	0	70.21	GVSFDQANNLLIEPARIEEEELTLTILR	3	3183.7	108.244	577	NA	NA	NA	0	1	0	0	966	49.8498	108.244	26590	37.5039	70.74	0.000133763	6	2900
42	24	NA	NA	NA	y1,y2,b3,b3-H2O,y3,y4,y4-H2O,y4-NH3,y5,y6,y7,b8,y8,y9,y9-H2O,y9-NH3,y5(2+),b7(2+),b8(2+),b9(2+),y9(2+),b10(2+),b12(2+),y13(2+),b14(2+),b15(2+),b16(2+),b17(2+),b18(2+),	175.118951,304.161541,390.152036,372.141472,417.245601,530.329661,512.319096,513.303112,643.413721,714.450831,827.534891,873.457706,928.582571,1025.635331,1007.624766,1008.608782,643.413721,760.373646,873.457706,974.505386,1025.635331,1045.542496,1203.611636,1355.789261,1401.712076,1514.796136,1585.833246,1698.917306,1812.001366,	11613	0	61.47	HDHAVSLLTAASPTIALLLER	4	2228.24	132.391	577	NA	NA	NA	0	0	0	0	795	49.0037	132.391	23226	40.3862	92.0047	0.000146085	6	2915
54	22	0.017274,0.491361,0.491361,0.000236,0.999768,	0.999948,0.000043,0.000008,	NA	b3,y3,y3-NH3,b4,b4-H2O,y4,y4-NH3,y5,b6,y6,y6-NH3,y7,b8,y9,b10,b9,b11,b11-H2O,b11-NH3,b10,y11,b11,b11*,b13,b12,b12*,y12,y12*,b14,y14,b15,b15-H2O,b15-NH3,y15,y15,b6(2+),b10(2+),y11(2+),y12(2+),b14(2+),y14(2+),y15(2+),y14(2+),y15(2+),y15(2+),b20(2+),b22(2+),y22(2+),y23(2+),b26(2+),	332.127466,360.224141,343.197592,419.159496,401.148932,431.261251,414.234702,528.314011,641.203389,641.398071,624.371522,770.440661,825.288179,982.520361,1027.326057,1072.252871,1097.400249,1079.389685,1080.373700,1107.292388,1246.571482,1257.332911,1159.337641,1300.529646,1305.425160,1207.429890,1343.624242,1245.628972,1499.530680,1527.709032,1586.562710,1568.552146,1569.536161,1624.761792,1646.…	6210	0	40.12	MAESPCSPSGQQPPSPPSPDELPANVK	3	2929.18	84.9992	577	Phosphorylation(2)	Sodium adduct(1)	NA	3	0	0	0	95	39.7772	84.9992	12420	37.5039	47.4953	0.0624503	38	4282
18	13	1.000000,	NA	NA	b2,b2-NH3,y2,y3,y4,y5,y5-H2O,b5,b5*,y6,b6,b6*,y7,b7,b7-NH3,b7*,y8,y8-NH3,y8*,b9,b9*,y9,y9-H2O,y9-NH3,y9*,	260.142726,243.116177,288.203011,359.240121,474.267061,602.325641,584.315076,669.267737,571.272467,731.368231,797.326317,699.331047,844.452291,912.353257,895.326708,814.357987,1011.450652,994.424103,913.455382,1096.474427,998.479157,1139.545612,1121.535047,1122.519063,1041.550342,	3991	0	32.27	MKSLEQDALR	2	1270.58	92.7851	577	Phosphorylation(1)	NA	NA	1	1	0	0	491	46.9108	92.7851	7982	38.3221	54.463	0.00463673	15	3602
20	17	0.033955,0.965822,0.000224,	NA	NA	b2,b2-NH3,b2,b3,b3-H2O,b3-NH3,y3,b3,b3-H2O,b3-NH3,y4,y4-H2O,y4-NH3,y4,y4-H2O,y4-NH3,y5,b5,b5-H2O,y5,y5-NH3,y6,b6,b6-H2O,y6,b7,y7,y8,b8,b8-H2O,b8-NH3,y8,y8-H2O,b9,y9,y9,b10,b10-H2O,b10-NH3,y10,	230.077146,213.050597,252.059089,343.161206,325.150642,326.134657,347.228891,365.143149,347.132585,348.116600,476.271481,458.260916,459.244932,476.271481,458.260916,459.244932,573.324241,591.238499,573.227935,595.306184,578.279635,686.408301,704.322559,686.311995,708.390244,801.375319,837.432834,912.503651,930.417909,912.407345,913.391360,934.485594,916.475029,1017.449939,1025.587711,1047.569654,…	6493	0	41.14	NDIPEIPESIK	2	1276.64	140.723	577	Sodium adduct(1)	NA	NA	1	0	0	0	693	48.4073	140.723	12986	51.4564	89.2667	2.12983823021777e-15	0	724
20	14	0.017274,0.491363,0.491363,	NA	NA	b2,b2-H2O,b2-NH3,b2,y2,b3,b3-H2O,b3-NH3,y3,b3,b3-H2O,b3-NH3,y5,b5,b5-H2O,b5-NH3,y5,y6,b6,b6-H2O,y6,y7,y7-H2O,y8,y8-H2O,y8-NH3,b8,b8-H2O,b8-NH3,y8,y8-H2O,y8-NH3,b9,b9-H2O,b9-NH3,y9,y9,b10,b10-NH3,	230.077146,212.066582,213.050597,252.059089,260.196861,343.161206,325.150642,326.134657,347.228891,365.143149,347.132585,348.116600,573.324241,591.238499,573.227935,574.211950,595.306184,686.408301,704.322559,686.311995,708.390244,837.432834,819.422269,912.503651,894.493086,895.477102,930.417909,912.407345,913.391360,934.485594,916.475029,917.459045,1017.449939,999.439375,1000.423390,1025.587711,…	6376	0	40.72	NDIPEIPESIK	2	1276.64	96.6662	577	Sodium adduct(1)	NA	NA	1	0	0	0	693	48.4073	96.6662	12752	37.6081	59.0581	0.00090123	10	3258
36	19	NA	NA	NA	b3,y4,y5,y5-H2O,y6,y7,b8,b8-H2O,b8-NH3,y9,y10,b9,b9-H2O,b9-NH3,b10,b10-H2O,b10-NH3,y11,y12,b12,b12-H2O,y13,y14,b14,b14-H2O,b14-NH3,b15,b15-H2O,b15-NH3,b16,b16-H2O,y17,y17-NH3,	340.186686,374.214631,503.257221,485.246656,604.304901,675.342011,876.457376,858.446812,859.430827,901.437361,958.458821,1062.536686,1044.526122,1045.510137,1119.558146,1101.547582,1102.531597,1144.538131,1281.597041,1345.653496,1327.642932,1394.681101,1495.728781,1517.738286,1499.727722,1500.711737,1646.780876,1628.770312,1629.754327,1717.817986,1699.807422,1777.861581,1760.835032,	6527	0	41.27	ELPGQTLHWGPEATEAAGR	2	2019.99	98.0089	577	NA	NA	NA	0	0	0	0	1255	50.9864	98.0089	13054	30.9182	67.0908	0.000187458	7	2929
61	28	NA	NA	NA	y3,y3-H2O,b5,b6,y4,y4-NH3,b7,y7,y7-NH3,b9,b9-H2O,y8,y8-H2O,y13,b16,b18,y16,y17,y17-NH3,b20,y5(2+),y13(2+),b16(2+),b18(2+),y16(2+),y18(2+),y21(2+),y22(2+),b24(2+),y23(2+),y24(2+),y25(2+),y26(2+),b29(2+),	347.228891,329.218326,396.224126,453.245586,494.297301,477.270752,566.329646,747.439931,730.413382,766.445736,748.435172,876.482521,858.471956,1404.752141,1405.706976,1629.797916,1715.875111,1852.934021,1835.907472,1873.919086,593.365711,1404.752141,1405.706976,1629.797916,1715.875111,1967.960961,2169.035911,2268.104321,2287.110126,2381.188381,2468.220411,2581.304471,2638.325931,2800.405226,	9154	0	50.76	AGGPLGLSIVGGSDHSSHPFGVQEPGVFISK	3	3033.53	121.692	577	NA	NA	NA	0	0	0	0	1529	51.8441	121.692	18308	48.8224	72.8693	0.00019402	7	2937
61	28	NA	NA	NA	y3,y4,b6,y5,b7,y6,y7,b9,y8,y9,b10,y10,y11,y12,b13,y13,b14,b15,b15-NH3,y15,y16,y16-NH3,y17,y8(2+),y13(2+),y16(2+),y17(2+),b23(2+),b28(2+),b29(2+),	417.245601,530.329661,593.340556,631.377341,706.424616,730.445751,843.529811,935.494486,957.572741,1028.609851,1034.562896,1141.693911,1255.736841,1312.758301,1362.737566,1411.826711,1433.774676,1546.858736,1529.832187,1583.875111,1680.927871,1663.901322,1794.011931,957.572741,1411.826711,1680.927871,1794.011931,2270.213866,2810.541006,2939.583596,	14130	0	74.89	SLAHLALNDVSLQALPGDVGNLANLVTLELR	3	3226.79	121.692	577	NA	NA	NA	0	0	0	0	539	47.3159	121.692	28260	35.4497	86.2419	0.00019402	7	2938
35	22	NA	NA	NA	y2,y3,y3-H2O,y4,b5,y5,b6,b6-H2O,y6,y6-H2O,b7,y7,b8,b8-H2O,y8,b9,b10,b11,b11-H2O,b11-NH3,b12,b12-NH3,b13,b7(2+),b10(2+),b12(2+),b13(2+),b14(2+),b15(2+),	262.150981,361.219391,343.208826,476.246331,536.307856,589.330391,607.344966,589.334402,718.372981,700.362416,721.387896,817.441391,868.456306,850.445742,930.525451,999.496796,1127.555376,1240.639436,1222.628872,1223.612887,1339.707846,1322.681297,1468.750436,721.387896,1127.555376,1339.707846,1468.750436,1581.834496,1696.861436,	14105	0	74.74	LPPEVANFMQLVELDVSR	3	2057.07	133.977	577	NA	NA	NA	0	0	0	0	1247	50.9587	133.977	28210	52.591	81.3862	0.000202055	7	2940
44	34	0.842105,0.157895,	NA	NA	b2,b2-NH3,y2,y2-NH3,b3,b3-NH3,y3,y3-H2O,y4,b4,b4-NH3,b5,b5-NH3,b5,y5,y6,y6-H2O,b6,b6-NH3,y7,y8,y9,b9,y10,y11,b10,b10-H2O,y12,y13,y14,b15,b17,y17,b9(2+),b11(2+),b13(2+),b14(2+),y16(2+),y16(2+),b16(2+),b17(2+),y17(2+),y17(2+),y18(2+),b18(2+),b19(2+),y19(2+),y20(2+),	252.109116,235.082567,288.203011,271.176462,365.193176,348.166627,375.235041,357.224476,488.319101,494.235766,477.209217,565.272876,548.246327,587.254819,587.387511,674.419541,656.408976,678.356936,661.330387,787.503601,858.540711,957.609121,1023.486989,1060.618311,1117.639771,1136.571049,1118.560485,1174.661231,1287.745291,1416.787881,1523.728679,1723.844769,1723.977461,1023.486989,1193.592509,1…	12207	0	64.28	NHLEALPPEIGGCVALSVLSLR	3	2310.23	250.49	577	Sodium adduct(1)	NA	NA	1	0	0	0	1176	50.7041	250.49	24414	45.9394	204.55	5.89122611882953e-49	0	53
77	31	NA	NA	NA	y3,y5,y6,b7,y7,b8,b9,b10,b11,b12,b13,b14,b15,b15-NH3,y15,y16,b18,y7(2+),b8(2+),b10(2+),b11(2+),b13(2+),b15(2+),y15(2+),y18(2+),y20(2+),y21(2+),y22(2+),y23(2+),y24(2+),y25(2+),y28(2+),	343.208821,626.340891,697.378001,735.403546,834.436911,834.471956,905.509066,1018.593126,1131.677186,1259.735766,1316.757226,1447.797716,1575.856296,1558.829747,1636.787961,1707.825071,1844.957456,834.436911,834.471956,1018.593126,1131.677186,1316.757226,1575.856296,1636.787961,1903.946241,2090.010291,2147.031751,2262.058691,2359.111451,2487.170031,2618.210521,2916.374621,	12491	0	65.79	LPQPEAVVALLQGMQPDGEGPVAPGGWHNGPHAPWAPR	4	3933.96	115.237	577	NA	NA	NA	0	0	0	0	1251	50.9726	115.237	24982	36.1363	79.1009	0.000220042	7	2953
18	15	NA	NA	NA	y1,b3,b3-H2O,y2,y2-H2O,y2-NH3,b4,y3,b5,b6,b6-H2O,y4,y5,b7,b7-H2O,y6,b8,y7,y7-H2O,y7-NH3,b9,y8,y8-H2O,y8-NH3,	175.118951,244.092786,226.082222,262.150981,244.140416,245.124432,315.129896,361.219391,372.151356,485.235416,467.224852,508.287801,621.371861,632.303826,614.293262,678.393321,731.372236,749.430431,731.419866,732.403882,818.404266,864.457371,846.446806,847.430822,	4765	0	34.97	AGDAGIFVSR	2	992.518	122.165	577	NA	NA	NA	0	0	0	0	346	45.3908	122.165	9530	103.787	18.378	0.000236407	7	2984
18	15	NA	NA	NA	y1,b3,y2,y2-H2O,y2-NH3,b4,y3,b5,b6,b6-H2O,y4,y5,b7,y6,b8,y7,y7-H2O,b9,b9-H2O,y8,y8-H2O,	175.118951,244.092786,262.150981,244.140416,245.124432,315.129896,361.219391,372.151356,485.235416,467.224852,508.287801,621.371861,632.303826,678.393321,731.372236,749.430431,731.419866,818.404266,800.393702,864.457371,846.446806,	4912	0	35.49	AGDAGIFVSR	2	992.516	122.165	577	NA	NA	NA	0	0	0	0	399	46.0097	122.165	9824	63.4428	58.7223	0.000236407	7	2987
18	15	NA	NA	NA	y1,b2,b2-H2O,y2,b3,b3-H2O,b4,b4-H2O,y3,b5,b5-H2O,y5,b7,y6,y6-H2O,y7,b8,b8-H2O,y8,y8-H2O,b9,b9-H2O,y9,y9-H2O,y9-NH3,	175.118951,187.107716,169.097152,288.203011,300.191776,282.181212,399.260186,381.249622,403.229951,456.281646,438.271082,589.294001,642.345696,646.315461,628.304896,745.383871,757.372636,739.362072,858.467931,840.457366,870.456696,852.446132,945.499961,927.489396,928.473412,	5332	0	36.96	VSLVGADDLR	2	1044.57	122.165	577	NA	NA	NA	0	0	0	0	432	46.3548	122.165	10664	71.6492	50.5159	0.000236407	7	2990
18	15	NA	NA	NA	y1,b2,y2,y2-NH3,b3,y3,y3-NH3,b4,y4,y4-H2O,y4-NH3,b5,y5,b6,b6-H2O,y6,y6-H2O,b7,y7,y8,y8-H2O,y8-NH3,y9,y9-NH3,	175.118951,213.159746,289.161881,272.135332,316.168936,418.204471,401.177922,429.252996,505.236501,487.225936,488.209952,544.279936,604.304911,643.348346,625.337782,719.331851,701.321286,730.380376,832.415911,935.425101,917.414536,918.398552,1034.493511,1017.466962,	5466	0	37.45	LVCLDVSENR	2	1147.58	122.165	577	NA	NA	NA	0	0	0	0	521	47.1684	122.165	10932	37.4146	84.7506	0.000236407	7	2991
18	15	NA	NA	NA	y1,b2,y2,b3,y3,y4,b4,y5,b5,y6,y6-H2O,b6,b7,b7-H2O,y7,b8,b8-H2O,y8,y8-H2O,y8-NH3,	147.112801,171.112796,204.134261,228.134256,261.155721,332.192831,375.202666,445.276891,462.234696,532.308921,514.298356,575.318756,646.355866,628.345302,679.377331,703.377326,685.366762,736.398791,718.388226,719.372242,	6075	0	39.68	GLGFSIAGGK	2	906.503	122.165	577	NA	NA	NA	0	0	0	0	293	44.6687	122.165	12150	42.9947	79.1704	0.000236407	7	2997
26	17	1.000000,	NA	NA	y1,y1-NH3,b2,b2-NH3,b3,y4,y5,b6,b6-NH3,y7,b8,b9,b9-NH3,y5(2+),y6(2+),y8(2+),b10(2+),y10(2+),y11(2+),y12(2+),y13(2+),	175.118951,158.092402,243.108786,226.082237,356.192846,459.267401,572.351461,627.346046,610.319497,820.428754,821.451566,972.476099,955.449550,572.351461,723.375994,917.481514,1085.560159,1101.602684,1188.634714,1301.718774,1429.777354,	8244	0	47.4	NQLSALPPELGNLR	3	1543.82	108.924	577	Sodium adduct(1)	NA	NA	1	0	0	0	917	49.6237	108.924	16488	58.2859	50.6385	0.0113341	23	3793
30	18	NA	NA	NA	y3,y3-NH3,y4,y4-H2O,b5,b5-H2O,y5,y5-H2O,y6,b7,b7-H2O,b7-NH3,y7,y7-NH3,y8,y9,b10,b10-NH3,y10,b11,b11-H2O,b11-NH3,y11,b12,b12-H2O,b12-NH3,y12,b13,b13-H2O,b13-NH3,y13,y14,y14-NH3,	343.208821,326.182272,472.251411,454.240846,506.224526,488.213962,585.335471,567.324906,698.419531,705.320216,687.309652,688.293667,811.503591,794.477042,925.546521,1039.589451,1046.490136,1029.463587,1110.626561,1159.574196,1141.563632,1142.547647,1238.685141,1272.658256,1254.647692,1255.631707,1353.712081,1401.700846,1383.690282,1384.674297,1500.780491,1587.812521,1570.785972,	8274	0	47.49	GVSFDQANNLLIEPAR	2	1743.9	105.808	577	NA	NA	NA	0	0	0	0	1012	50.0518	105.808	16548	40.5023	65.3059	0.000279333	7	3038
43	24	NA	NA	NA	y1,y2,y2-NH3,y3,y4,y4-NH3,y5,y6,y7,y7-H2O,b8,y9,y9-H2O,y9-NH3,y10,y10-H2O,b11,y11,b6(2+),b7(2+),y7(2+),b8(2+),b9(2+),y9(2+),b10(2+),y11(2+),b12(2+),y12(2+),y13(2+),b14(2+),	175.118951,304.161541,287.134992,417.245601,530.329661,513.303112,643.413721,714.450831,827.534891,809.524326,873.457706,1025.635331,1007.624766,1008.608782,1112.667361,1094.656796,1116.579606,1183.704471,647.289586,760.373646,827.534891,873.457706,974.505386,1025.635331,1045.542496,1183.704471,1203.611636,1254.741581,1355.789261,1401.712076,	11468	0	60.8	HDHAVSLLTAASPTIALLLER	4	2228.24	129.281	577	NA	NA	NA	0	0	0	0	751	48.7564	129.281	22936	34.9526	94.328	0.000288492	7	3048
57	25	NA	NA	NA	y2,y2-NH3,b4,b4-H2O,y3,y4,y5,y5-H2O,b7,b7-NH3,y6,y6-H2O,y6-NH3,y7,b10,b11,b11-NH3,b12,b13,b13-H2O,y6(2+),y7(2+),b10(2+),b11(2+),b12(2+),b13(2+),y15(2+),y16(2+),b19(2+),b20(2+),b21(2+),b23(2+),b26(2+),	288.203011,271.176462,391.197586,373.187022,401.287071,502.334751,615.418811,597.408246,705.320216,688.293667,716.466491,698.455926,699.439942,829.550551,1046.490136,1159.574196,1142.547647,1272.658256,1401.700846,1383.690282,716.466491,829.550551,1046.490136,1159.574196,1272.658256,1401.700846,1782.995951,1912.038541,2097.061066,2226.103656,2355.146246,2569.277986,2896.493786,	12914	0	67.88	GVSFDQANNLLIEPARIEEEELTLTILR	4	3183.7	104.042	577	NA	NA	NA	0	1	0	0	953	49.7909	104.042	25828	49.0965	54.945	0.000411846	8	3073
44	24	NA	NA	NA	y1,b2,b2-NH3,y2,b3,y3,y4,y4-H2O,b4,y5,y6,b6,y7,y8,b9,b3(2+),b6(2+),b9(2+),b10(2+),b11(2+),b14(2+),b15(2+),y15(2+),y16(2+),b17(2+),b18(2+),	175.118951,252.109116,235.082567,288.203011,365.193176,375.235041,488.319101,470.308536,494.235766,587.387511,674.419541,678.356936,787.503601,858.540711,1001.505046,365.193176,678.356936,1001.505046,1114.589106,1171.610566,1430.709626,1501.746736,1513.840641,1610.893401,1701.862826,1800.931236,	12215	0	64.31	NHLEALPPEIGGCVALSVLSLR	4	2288.24	126.293	577	NA	NA	NA	0	0	0	0	1005	50.0217	126.293	24430	46.0328	80.2602	0.0004404	8	3081
36	22	NA	NA	NA	y2,y3,y3-H2O,y4,y4-H2O,b5,y5,y5-NH3,y6,y7,b8,y8,b9,y9,b10,b10-H2O,b11,b11-H2O,b11-NH3,b12,b13,b7(2+),b10(2+),b11(2+),b12(2+),b13(2+),b14(2+),b17(2+),	262.150981,361.219391,343.208826,476.246331,458.235766,536.307856,589.330391,572.303842,718.372981,817.441391,868.456306,930.525451,999.496796,1058.584031,1127.555376,1109.544812,1240.639436,1222.628872,1223.612887,1339.707846,1468.750436,721.387896,1127.555376,1240.639436,1339.707846,1468.750436,1581.834496,1882.961876,	16206	0	95.71	LPPEVANFMQLVELDVSR	3	2057.07	130.311	577	NA	NA	NA	0	0	0	0	1244	50.9482	130.311	32412	57.0324	73.2784	0.000445893	8	3084
29	20	NA	NA	NA	y1,b2,b2-NH3,b3,y4,b5,b5-H2O,y5,b6,b6-H2O,b6-NH3,y6,b7,y7,y8,y8-NH3,b9,y9,y4(2+),y5(2+),b7(2+),y7(2+),y8(2+),y12(2+),y13(2+),	175.118951,243.108786,226.082237,356.192846,459.267401,514.261986,496.251422,572.351461,627.346046,609.335482,610.319497,701.394051,724.398806,798.446811,895.499571,878.473022,950.494156,1008.583631,459.267401,572.351461,724.398806,798.446811,895.499571,1279.736831,1407.795411,	8203	0	47.25	NQLSALPPELGNLR	3	1521.84	133.901	577	NA	NA	NA	0	0	0	0	753	48.7679	133.901	16406	49.3252	84.5762	0.00051514	8	3111
16	14	NA	NA	NA	y1,b2,y2,y2-NH3,b3,y3,y4,y4-NH3,b5,y5,b6,y6,b7,y7,y7-H2O,y7-NH3,b8,b8-H2O,y8,y8-H2O,	147.112801,197.128446,244.165561,227.139012,325.187026,341.218321,398.239781,381.213232,525.266726,527.282371,582.288186,598.319481,679.340946,726.378061,708.367496,709.351512,776.393706,758.383142,823.430821,805.420256,	1068	0	20.98	VPQAEGPPK	2	922.499	120.059	577	NA	NA	NA	0	0	0	0	317	45.0106	120.059	2136	32.9711	87.0879	0.000640312	9	3164
16	14	NA	NA	NA	y1,b2,y2,y2-NH3,b3,y3,b4,y4,b5,y5,b6,y6,b7,y7,y7-H2O,y7-NH3,y8,y8-H2O,	147.112801,197.128446,244.165561,227.139012,325.187026,341.218321,396.224136,398.239781,525.266726,527.282371,582.288186,598.319481,679.340946,726.378061,708.367496,709.351512,823.430821,805.420256,	1143	0	21.31	VPQAEGPPK	2	922.499	120.059	577	NA	NA	NA	0	0	0	0	317	45.0106	120.059	2286	42.1236	77.9354	0.000640312	9	3165
16	14	NA	NA	NA	b2,y1,y1-NH3,b3,b4,b4-H2O,y2,b5,b5-H2O,y3,b6,b6-H2O,y4,b7,b7-H2O,b7-NH3,y5,y6,b8,b8-H2O,b8-NH3,y7,y7-H2O,y7-NH3,	129.065846,175.118951,158.092402,186.087306,287.134986,269.124422,306.159441,358.172096,340.161532,434.218021,457.240506,439.229942,533.286431,585.299086,567.288522,568.272537,604.323541,705.371221,716.339576,698.329012,699.313027,762.392681,744.382116,745.366132,	1515	0	22.82	GAGTAVQMR	2	890.452	120.059	577	NA	NA	NA	0	0	0	0	232	43.6549	120.059	3030	42.9947	77.0644	0.000640312	9	3166
16	14	NA	NA	NA	y1,b3,b3-H2O,y2,y2-H2O,b4,b4-H2O,y3,y4,y4-H2O,b5,b6,b6-H2O,b6-NH3,y5,y5-NH3,b7,b7-H2O,y6,b8,b8-H2O,b8-NH3,y7,y8,	175.118951,230.113526,212.102962,290.145891,272.135326,343.197586,325.187022,347.167351,446.235761,428.225196,471.256166,570.324576,552.314012,553.298027,574.294341,557.267792,627.346036,609.335472,687.378401,742.372976,724.362412,725.346427,788.426081,845.447541,	2018	0	24.79	AGTLQVGDR	2	916.485	120.059	577	NA	NA	NA	0	0	0	0	353	45.4777	120.059	4036	47.6423	72.4168	0.000640312	9	3170
16	14	NA	NA	NA	y1,b3,b3-H2O,y2,b4,b4-H2O,y3,y4,y4-H2O,b5,b6,b6-H2O,b6-NH3,y5,y5-H2O,y5-NH3,b7,b7-H2O,b7-NH3,y6,b8,b8-H2O,b8-NH3,y7,y8,	175.118951,230.113526,212.102962,290.145891,343.197586,325.187022,347.167351,446.235761,428.225196,471.256166,570.324576,552.314012,553.298027,574.294341,556.283776,557.267792,627.346036,609.335472,610.319487,687.378401,742.372976,724.362412,725.346427,788.426081,845.447541,	2106	0	25.19	AGTLQVGDR	2	916.484	120.059	577	NA	NA	NA	0	0	0	0	328	45.1587	120.059	4212	47.6423	72.4168	0.000640312	9	3171
16	14	NA	NA	NA	y1,b2,y2,y2-NH3,b3,b4,y3,y3-NH3,y4,y4-H2O,y4-NH3,b6,b6-H2O,y5,y5-H2O,y5-NH3,y6,y6-NH3,b7,b7-H2O,b7-NH3,y7,y7-H2O,y7-NH3,b8,y8,y8-H2O,y8-NH3,	175.118951,211.144096,288.203011,271.176462,326.171036,383.192496,416.261591,399.235042,517.309271,499.298706,500.282722,631.308586,613.298022,664.377681,646.367116,647.351132,721.399141,704.372592,759.367166,741.356602,742.340617,836.426081,818.415516,819.399532,872.451226,933.478841,915.468276,916.452292,	6122	0	39.83	LPDGFTQLR	2	1046.56	120.059	577	NA	NA	NA	0	0	0	0	385	45.8546	120.059	12244	46.8021	73.2569	0.000640312	9	3199
16	14	NA	NA	NA	y1,b2,y2,y2-NH3,b3,b3-H2O,b4,y3,y3-NH3,y4,y4-NH3,b5,b6,b6-H2O,y5,y5-H2O,y6,y6-NH3,b7,b7-H2O,y7,y7-H2O,y7-NH3,y8,y8-H2O,y8-NH3,	175.118951,211.144096,288.203011,271.176462,326.171036,308.160472,383.192496,416.261591,399.235042,517.309271,500.282722,530.260906,631.308586,613.298022,664.377681,646.367116,721.399141,704.372592,759.367166,741.356602,836.426081,818.415516,819.399532,933.478841,915.468276,916.452292,	6232	0	40.22	LPDGFTQLR	2	1046.56	120.059	577	NA	NA	NA	0	0	0	0	437	46.4048	120.059	12464	42.9947	77.0644	0.000640312	9	3200
54	24	NA	NA	NA	y4,b5,y5,b6,b6-H2O,b7,y6,y7,y8,b11,y11,b13,b14,b15,y16,y13(2+),y15(2+),y16(2+),y17(2+),y18(2+),y19(2+),y21(2+),y22(2+),y23(2+),y24(2+),	502.334751,506.224526,615.418811,634.283106,616.272542,705.320216,716.466491,829.550551,958.593141,1159.574196,1345.720911,1401.700846,1498.753606,1569.790716,1912.038541,1614.906081,1782.995951,1912.038541,2025.122601,2138.206661,2251.290721,2479.376581,2550.413691,2678.472271,2793.499211,	14106	0	74.75	GVSFDQANNLLIEPARIEEEELTLTILR	3	3183.7	101.643	577	NA	NA	NA	0	1	0	0	910	49.5904	101.643	28212	37.5039	64.1393	0.000761319	9	3232
54	24	NA	NA	NA	b4,y3,y4,y4-H2O,b5,y5,y6,y7,y8,b11,b11-NH3,y10,b12,b12-H2O,b12-NH3,b13,y12,y12-H2O,y13(2+),y15(2+),y16(2+),y17(2+),y19(2+),y20(2+),y21(2+),y22(2+),y23(2+),y24(2+),b27(2+),	391.197586,401.287071,502.334751,484.324186,506.224526,615.418811,716.466491,829.550551,958.593141,1159.574196,1142.547647,1216.678321,1272.658256,1254.647692,1255.631707,1401.700846,1458.804971,1440.794406,1614.906081,1782.995951,1912.038541,2025.122601,2251.290721,2365.333651,2479.376581,2550.413691,2678.472271,2793.499211,3009.577846,	14924	0	80.38	GVSFDQANNLLIEPARIEEEELTLTILR	3	3183.7	101.643	577	NA	NA	NA	0	1	0	0	973	49.8811	101.643	29848	44.0449	57.5983	0.000761319	9	3233
54	24	NA	NA	NA	y4,b5,b5-H2O,b7,y6,y7,y8,b11,b11-NH3,y10,b12,b12-NH3,b13,b13-NH3,b15,y12(2+),b16(2+),y15(2+),y16(2+),y17(2+),y18(2+),y19(2+),y20(2+),y21(2+),y22(2+),y23(2+),y24(2+),b27(2+),	502.334751,506.224526,488.213962,705.320216,716.466491,829.550551,958.593141,1159.574196,1142.547647,1216.678321,1272.658256,1255.631707,1401.700846,1384.674297,1569.790716,1458.804971,1725.891826,1782.995951,1912.038541,2025.122601,2138.206661,2251.290721,2365.333651,2479.376581,2550.413691,2678.472271,2793.499211,3009.577846,	15285	0	83.71	GVSFDQANNLLIEPARIEEEELTLTILR	3	3183.7	101.643	577	NA	NA	NA	0	1	0	0	910	49.5904	101.643	30570	43.613	58.0303	0.000761319	9	3234
76	30	NA	NA	NA	y2,y5,y6,b7,y7,b8,b9,b10,y10,b11,y11,b12,b12-NH3,b13,b14,y14,b15,b15-NH3,y16,b9(2+),y9(2+),b10(2+),b11(2+),b13(2+),b14(2+),y15(2+),y16(2+),y18(2+),y19(2+),y21(2+),y22(2+),y23(2+),	272.171711,626.340891,697.378001,735.403546,834.436911,834.471956,905.509066,1018.593126,1102.554061,1131.677186,1239.612971,1259.735766,1242.709217,1316.757226,1447.797716,1539.735201,1575.856296,1558.829747,1707.825071,905.509066,988.511131,1018.593126,1131.677186,1316.757226,1447.797716,1636.787961,1707.825071,1903.946241,1960.967701,2147.031751,2262.058691,2359.111451,	11563	0	61.23	LPQPEAVVALLQGMQPDGEGPVAPGGWHNGPHAPWAPR	5	3933.97	109.163	577	NA	NA	NA	0	0	0	0	1275	51.0551	109.163	23126	23.3814	85.7811	0.000784808	9	3242
45	24	NA	NA	NA	b2,y2,y2-NH3,b3,y3,y3-NH3,b4,b4,b6,b9,y8,y9,b4(2+),b7(2+),b8(2+),b9(2+),y9(2+),y10(2+),y12(2+),y13(2+),y14(2+),y15(2+),y16(2+),y17(2+),y18(2+),y19(2+),	227.175396,288.203011,271.176462,356.217986,359.240121,342.213572,455.286396,455.286396,626.350786,909.540366,924.489731,1061.548641,455.286396,725.419196,796.456306,909.540366,1061.548641,1190.591231,1318.649801,1446.708381,1559.792441,1630.829551,1729.897961,1786.919421,1900.962351,2000.030761,	6545	0	41.34	LLEVNGVALQGAEHHEAVEALR	4	2355.24	123.42	577	NA	NA	NA	0	0	0	0	1158	50.6371	123.42	13090	37.7494	85.6703	0.000798254	9	3248
55	26	NA	NA	NA	y4,y4-H2O,b6,y6,y6-H2O,b7,y7,y8,b8,b8-H2O,y9,y9-H2O,y9-NH3,b10,y10,b11,y11,y11-H2O,b12,y12,b14,b15,b16,b16-NH3,b17,b17-H2O,b17-NH3,y7(2+),y11(2+),y12(2+),y14(2+),y20(2+),b20(2+),b21(2+),b22(2+),	460.251421,442.240856,599.303496,644.336211,626.325646,700.351176,731.368241,802.405351,813.435236,795.424672,988.484661,970.474096,971.458112,999.499286,1085.537421,1128.541876,1182.590181,1164.579616,1257.584466,1310.648761,1514.685636,1629.712576,1758.755166,1741.728617,1886.813746,1868.803182,1869.787197,731.368241,1182.590181,1310.648761,1554.718291,2255.968691,2266.998576,2338.035686,2425.0…	8265	0	47.47	LALDGETLGEEEQEDEQPPWASPSPTSR	3	3068.4	117.208	577	NA	NA	NA	0	0	0	0	877	49.43	117.208	16530	31.7222	85.4856	0.0008734	10	3252
20	13	0.993451,0.006549,	NA	NA	y1,b2,b2-NH3,y2,y2-NH3,y2,y2-H2O,b3,y3,b4,y4,y4-H2O,y5,y5-H2O,y5,y5-NH3,y6,b7,y7,y7-NH3,y7,y7-H2O,y7-NH3,b9,b10,b10-H2O,b10-NH3,	175.118951,202.082236,185.055687,290.145891,273.119342,312.127834,294.117269,315.166296,403.229951,466.190829,490.261981,472.251416,577.294011,559.283446,599.275954,582.249405,690.378071,753.338949,777.410101,760.383552,799.392044,781.381479,782.365495,953.455039,1068.481979,1050.471415,1051.455430,	5011	0	35.82	NSLESISSIDR	2	1242.59	84.0636	577	Sodium adduct(1)	NA	NA	1	0	0	0	605	47.8176	84.0636	10022	46.8021	37.2614	0.0721953	42	4371
20	13	0.004771,0.723803,0.135713,0.135713,	NA	NA	b2,b2,y2,b3,b3-H2O,b3-NH3,y3,b4,b4-H2O,b4-NH3,y4,y4-H2O,y4,y4*,y5,y5-H2O,b7,b7-H2O,b7-NH3,y6,y7,y7-H2O,y7,y7-H2O,y7*,y8,y8-H2O,y8,y8-H2O,y8-NH3,y8*,y9,y9-NH3,y9,y9-NH3,b10,y10,	202.082236,282.048567,290.145891,315.166296,297.155732,298.139747,403.229951,444.208886,426.198322,427.182337,490.261981,472.251416,570.228312,472.233042,577.294011,559.283446,731.357006,713.346442,714.330457,770.344402,777.410101,759.399536,857.376432,839.365867,759.381162,906.452691,888.442126,986.419022,968.408457,969.392473,888.423752,1019.536751,1002.510202,1099.503082,1082.476533,1126.46636…	5428	0	37.29	NSLESISSIDR	2	1300.58	84.0636	577	Phosphorylation(1)	NA	NA	1	0	0	0	429	46.3246	84.0636	10856	29.3102	54.7533	0.0721953	42	4374
41	26	0.000565,0.085664,0.456876,0.456876,0.000020,	NA	NA	y3,b3,b3-H2O,b3-NH3,y4,b4,b4-H2O,b4-NH3,y5,b5,b5-H2O,b5-NH3,y6,y7,y8,y9,y9-H2O,b10,y10,b10,b10-H2O,b11,y12,b12,b12-NH3,b12,b12-NH3,b14,y6(2+),y9(2+),y11(2+),b12(2+),b13(2+),y14(2+),b14(2+),y16(2+),y17(2+),y18(2+),y19(2+),	301.187021,315.166296,297.155732,298.139747,358.208481,444.208886,426.198322,427.182337,487.251071,531.240916,513.230352,514.214367,584.303831,671.335861,784.419921,913.462511,895.451946,1046.500036,1069.563621,1126.466367,1108.455803,1282.567477,1297.674621,1331.643736,1314.617187,1411.610067,1394.583518,1611.726157,584.303831,993.428842,1184.590561,1411.610067,1524.694127,1551.705012,1611.72615…	8103	0	46.91	NSLESISSIDRELSPEGPGK	3	2195.02	158.566	577	Phosphorylation(1)	NA	NA	1	1	0	0	1183	50.7298	158.566	16206	74.424	84.1416	1.43282974198648e-13	0	892
37	22	NA	NA	NA	b2,y2,b4,y4,y5,y5-H2O,b6,b6-H2O,y6,y7,b8,y8,b9,b10,b11,b11-NH3,b12,b9(2+),b10(2+),b11(2+),b12(2+),b13(2+),b14(2+),b16(2+),y16(2+),	211.144096,262.150981,437.239446,476.246331,589.330391,571.319826,607.344966,589.334402,718.372981,817.441391,868.456306,930.525451,999.496796,1127.555376,1240.639436,1223.612887,1339.707846,999.496796,1127.555376,1240.639436,1339.707846,1468.750436,1581.834496,1795.929846,1846.936731,	15575	0	86.47	LPPEVANFMQLVELDVSR	3	2057.07	126.825	577	NA	NA	NA	0	0	0	0	1256	50.9899	126.825	31150	44.8204	82.0046	0.000919576	10	3266
40	25	0.000114,0.017271,0.491251,0.491251,0.000114,	NA	NA	b3,b3-H2O,b3-NH3,y4,b4,b4-H2O,y6,y6-H2O,y6-NH3,y7,y8,b8,y9,b9,b9-H2O,b10,b10,b10-H2O,b12,b12-NH3,b12*,b14,b14-H2O,b14*,y5(2+),y6(2+),b7(2+),y9(2+),y9(2+),y10(2+),y11(2+),b12(2+),b13(2+),y14(2+),b14(2+),y15(2+),y16(2+),b16(2+),y17(2+),y18(2+),	315.166296,297.155732,298.139747,358.208481,444.208886,426.198322,584.303831,566.293266,567.277282,671.335861,784.419921,818.389036,913.462511,931.473096,913.462532,1046.500036,1126.466367,1108.455803,1411.610067,1394.583518,1313.614797,1611.726157,1593.715593,1513.730887,487.251071,584.303831,731.357006,913.462511,993.428842,1069.563621,1184.590561,1411.610067,1524.694127,1551.705012,1611.726157…	8009	0	46.58	NSLESISSIDRELSPEGPGK	3	2195.02	150.533	577	Phosphorylation(1)	NA	NA	1	1	0	0	1177	50.7078	150.533	16018	64.0645	86.4685	1.50239629377768e-11	0	1150
38	23	0.000000,0.000008,0.000232,0.000232,0.999529,	NA	NA	y3,y3-NH3,b3,b3-H2O,b3-NH3,y4,b4,b4-H2O,b4-NH3,b5,b5-H2O,y6,y7,b9,b10,b10,b13,y5(2+),b7(2+),y9(2+),y10(2+),y11(2+),y12(2+),y14(2+),y15(2+),y16(2+),y17(2+),y18(2+),y19(2+),	301.187021,284.160472,315.166296,297.155732,298.139747,358.208481,444.208886,426.198322,427.182337,531.240916,513.230352,584.303831,751.302192,931.473096,1046.500036,1046.500036,1444.727796,487.251071,731.357006,993.428842,1149.529952,1264.556892,1377.640952,1551.705012,1664.789072,1751.821102,1880.863692,1993.947752,2080.979782,	7186	0	43.65	NSLESISSIDRELSPEGPGK	3	2195.02	134.658	577	Phosphorylation(1)	NA	NA	1	1	0	0	1184	50.7335	134.658	14372	51.531	83.1273	4.8658851473732e-08	1	1787
48	23	NA	NA	NA	y2,y2-NH3,y3,y4,y5,y6,b7,b8,b8-H2O,b10,b11,y5(2+),y6(2+),b8(2+),b9(2+),b11(2+),b12(2+),y11(2+),b13(2+),y12(2+),y13(2+),y15(2+),b16(2+),b17(2+),b18(2+),	274.187361,257.160812,387.271421,500.355481,587.387511,700.471571,753.316196,852.384606,834.374042,1010.453746,1123.537806,587.387511,700.471571,852.384606,939.416636,1123.537806,1236.621866,1298.761281,1392.722976,1411.845341,1524.929401,1682.998541,1705.868986,1834.911576,1947.995636,	12824	0	67.4	DATHQEAVSALLRPCLELSLLVR	4	2534.38	106.003	577	NA	NA	NA	0	1	0	0	889	49.489	106.003	25648	34.7794	71.2237	0.0010601	10	3276
38	23	0.000008,0.001153,0.032809,0.032809,0.933222,	NA	NA	b3,b3-H2O,b3-NH3,y4,b4,b4-H2O,b4-NH3,y5,y6,b6,b6-NH3,y7,y8,b8,y8,b9,b10,b10,b11,y12,y12-NH3,b7(2+),y9(2+),y10(2+),y11(2+),y14(2+),y15(2+),y16(2+),y17(2+),y18(2+),y19(2+),	315.166296,297.155732,298.139747,358.208481,444.208886,426.198322,427.182337,487.251071,584.303831,644.324976,627.298427,751.302192,784.419921,818.389036,864.386252,931.473096,1046.500036,1046.500036,1202.601146,1297.674621,1280.648072,731.357006,993.428842,1149.529952,1264.556892,1551.705012,1664.789072,1751.821102,1880.863692,1993.947752,2080.979782,	7282	0	43.99	NSLESISSIDRELSPEGPGK	3	2195.02	134.658	577	Phosphorylation(1)	NA	NA	1	1	0	0	1180	50.7188	134.658	14564	41.7957	92.8625	4.8658851473732e-08	1	1788
14	13	NA	NA	NA	y1,b2,b2-H2O,y2,y2-NH3,b3,b3-H2O,y3,b4,y4,b5,b5-NH3,y5,b6,b6-NH3,y6,y6-NH3,b7,b7-H2O,b7-NH3,y7,y7-H2O,y7-NH3,	175.118951,215.139016,197.128452,290.145891,273.119342,329.181946,311.171382,389.214301,442.266006,503.257231,556.308936,539.282387,616.341291,655.377346,638.350797,730.384221,713.357672,770.404286,752.393722,753.377737,831.431901,813.421336,814.405352,	2958	0	28.47	LTNLNVDR	2	944.517	118.962	577	NA	NA	NA	0	0	0	0	362	45.5871	118.962	5916	59.0289	59.933	0.0012807	11	3302
14	13	NA	NA	NA	y1,b2,b2-H2O,y2,y2-NH3,b3,b3-H2O,b3-NH3,y3,b4,b4-H2O,y4,b5,b5-H2O,b5-NH3,y5,y5-H2O,b6,b6-NH3,y6,y6-H2O,y6-NH3,b7,b7-NH3,y7,y7-H2O,y7-NH3,	175.118951,215.139016,197.128452,290.145891,273.119342,329.181946,311.171382,312.155397,389.214301,442.266006,424.255442,503.257231,556.308936,538.298372,539.282387,616.341291,598.330726,655.377346,638.350797,730.384221,712.373656,713.357672,770.404286,753.377737,831.431901,813.421336,814.405352,	3050	0	28.84	LTNLNVDR	2	944.516	118.962	577	NA	NA	NA	0	0	0	0	361	45.5751	118.962	6100	47.6423	71.3197	0.0012807	11	3303
14	13	NA	NA	NA	y1,b2,b2-H2O,y2,b3,b3-H2O,y3,b4,b4-H2O,y4,b5,y5,b6,b6-NH3,y6,y6-NH3,b7,y7,y7-NH3,	175.118951,215.139016,197.128452,290.145891,329.181946,311.171382,389.214301,442.266006,424.255442,503.257231,556.308936,616.341291,655.377346,638.350797,730.384221,713.357672,770.404286,831.431901,814.405352,	3141	0	29.19	LTNLNVDR	2	944.516	118.962	577	NA	NA	NA	0	0	0	0	375	45.7403	118.962	6282	47.6423	71.3197	0.0012807	11	3305
14	13	NA	NA	NA	y1,y1-NH3,b2,y2,b3,y3,b4,y4,y4-NH3,y4,y4-NH3,b5,y5,y5-NH3,b6,b6-NH3,y6,y6-H2O,y6-NH3,b7,b7-H2O,b7-NH3,	175.118951,158.092402,201.123366,288.203011,330.165956,359.240121,458.224536,474.267061,457.240512,474.267061,457.240512,573.251476,602.325641,585.299092,644.288586,627.262037,731.368231,713.357666,714.341682,757.372646,739.362082,740.346097,	3587	0	30.8	SLEQDALR	2	931.483	118.962	577	NA	NA	NA	0	0	0	0	339	45.302	118.962	7174	47.6423	71.3197	0.0012807	11	3311
18	14	NA	NA	NA	y1,b2,y2,b3,b4,y4,y4-NH3,b5,b5-H2O,y5,b7,y6,y7,y7-H2O,y8,y8-H2O,b9,y9,	175.118951,197.128446,303.213911,325.187026,396.224136,497.319431,480.292882,525.266726,507.256162,554.340891,679.340946,683.383481,754.420591,736.410026,882.479171,864.468606,904.488666,979.531931,	707	0	19.13	VPQAEGPPKR	2	1078.6	106.844	577	NA	NA	NA	0	1	0	0	526	47.2099	106.844	1414	37.6081	69.2356	0.00144777	11	3356
18	14	NA	NA	NA	y2,y2-NH3,b2,b2-NH3,y3,y4,b4,b4-NH3,b5,y6,b6,b7,y7,y8,y8-H2O,y8-NH3,b8,y9,y9-H2O,y9-NH3,b9,	260.196861,243.170312,270.192446,253.165897,388.255441,445.276901,482.272146,465.245597,539.293606,615.382421,652.377666,709.399126,730.409361,827.462121,809.451556,810.435572,837.457706,940.546181,922.535616,923.519632,950.541766,	3984	0	32.25	RLPDGIGQLK	2	1096.65	106.844	577	NA	NA	NA	0	1	0	0	290	44.624	106.844	7968	52.2736	54.57	0.00144777	11	3365
18	14	NA	NA	NA	b1,b1,y2,b2,y4,b4,b5,y6,b6,b7,b7-NH3,y8,y8-H2O,b8,b8-NH3,y9,y9-H2O,y9-NH3,b9,	157.108386,157.108386,260.196861,270.192446,445.276901,482.272146,539.293606,615.382421,652.377666,709.399126,692.372577,827.462121,809.451556,837.457706,820.431157,940.546181,922.535616,923.519632,950.541766,	4681	0	34.66	RLPDGIGQLK	2	1096.65	106.844	577	NA	NA	NA	0	1	0	0	316	44.9969	106.844	9362	75.6818	31.1619	0.00144777	11	3368
27	19	NA	NA	NA	y1,y2,y2-NH3,b4,b5,y4,b6,y5,b7,y6,y6-H2O,y7,b11,b5(2+),b6(2+),b7(2+),y6(2+),y7(2+),y8(2+),b10(2+),y10(2+),	175.118951,338.182281,321.155732,441.191466,569.250046,580.308931,640.287156,709.351521,739.355566,806.404281,788.393716,905.472691,1207.577566,569.250046,640.287156,739.355566,806.404281,905.472691,976.509801,1094.493506,1217.652441,	5633	0	38.08	HCSLQAVPEEIYR	3	1544.75	130.001	577	NA	NA	NA	0	0	0	0	862	49.3551	130.001	11266	51.864	78.1371	0.00144855	11	3376
78	30	NA	NA	NA	b5,y5,y5-NH3,y7,b8,b9,y9,b10,b11,b12,b12-H2O,b12-NH3,b13,b14,b15,b15-H2O,b15-NH3,y15,y15-NH3,b17,b9(2+),y9(2+),b10(2+),b11(2+),b13(2+),b14(2+),y15(2+),b16(2+),y16(2+),y18(2+),y21(2+),y22(2+),y24(2+),b28(2+),y31(2+),b32(2+),	565.298026,626.340891,609.314342,834.436911,834.471956,905.509066,988.511131,1018.593126,1131.677186,1259.735766,1241.725202,1242.709217,1316.757226,1447.797716,1575.856296,1557.845732,1558.829747,1636.787961,1619.761412,1787.935996,905.509066,988.511131,1018.593126,1131.677186,1316.757226,1447.797716,1636.787961,1672.909056,1707.825071,1903.946241,2147.031751,2262.058691,2487.170031,2832.413686,…	12001	0	63.27	LPQPEAVVALLQGMQPDGEGPVAPGGWHNGPHAPWAPR	4	3933.94	105.789	577	NA	NA	NA	0	0	0	0	1209	50.8243	105.789	24002	45.1697	60.6189	0.00153282	11	3386
12	12	NA	NA	NA	y1,y1-NH3,y2,y2,b2,y3,y3-NH3,b3,y4,b4,y5,y5-H2O,y5-NH3,b5,b5-H2O,b6,y6,	175.118951,158.092402,274.187361,274.187361,311.139016,403.229951,386.203402,440.181606,516.314011,553.265666,645.356601,627.346036,628.330052,682.308256,664.297692,781.376666,792.425011,	6965	0	42.87	YFELEVR	2	955.488	120	577	NA	NA	NA	0	0	0	0	401	46.0314	120	13930	59.0289	60.9711	0.00153415	11	3397
56	24	NA	NA	NA	y3,b5,y5,b6,y6,b7,b7-NH3,b8,b8-NH3,y8,y8-H2O,b9,y9,y11,y13(2+),y15(2+),y17(2+),b20(2+),b21(2+),y21(2+),y22(2+),y23(2+),b24(2+),y24(2+),y25(2+),y26(2+),y27(2+),	347.228891,536.307856,573.324241,607.344966,686.408301,721.387896,704.361347,868.456306,851.429757,912.503651,894.493086,999.496796,1025.587711,1254.657581,1497.790721,1711.886071,1954.012721,2268.132856,2381.216916,2425.264261,2572.332671,2686.375601,2720.396326,2757.412711,2856.481121,2985.523711,3082.576471,	13660	0	72.15	LPPEVANFMQLVELDVSRNDIPEIPESIK	3	3292.73	97.5941	577	NA	NA	NA	0	1	0	0	1067	50.2816	97.5941	27320	39.1658	58.4283	0.00155829	11	3398
38	22	0.000195,0.841777,0.157833,0.000195,	NA	NA	y3,b3,b3-H2O,b3-NH3,y4,y5,y6,y6-H2O,y6-NH3,y9,b10,y10,y10,b11,y12,y12,b12,b12-NH3,b13,y9(2+),y10(2+),y11(2+),y13(2+),y14(2+),b14(2+),y15(2+),y16(2+),b16(2+),y17(2+),b17(2+),y18(2+),y19(2+),	301.187021,315.166296,297.155732,298.139747,358.208481,487.251071,584.303831,566.293266,567.277282,913.462511,1068.481979,1069.563621,1091.545564,1224.583089,1297.674621,1319.656564,1331.643736,1314.617187,1444.727796,935.444454,1069.563621,1206.572504,1406.688594,1493.720624,1553.741769,1606.804684,1693.836714,1779.837119,1822.879304,1836.858579,1935.963364,2022.995394,	7289	0	44.01	NSLESISSIDRELSPEGPGK	3	2137.04	123.504	577	Sodium adduct(1)	NA	NA	1	1	0	0	1410	51.4922	123.504	14578	44.8204	78.6831	5.89173330099412e-06	2	2390
67	28	NA	NA	NA	b2,b3,b4,y3,b5,y4,y5,y7,y8,y9,y11,b12,b12-H2O,y12,b13,b14,b14-H2O,b16,y5(2+),y7(2+),y8(2+),y13(2+),b14(2+),b16(2+),y16(2+),b17(2+),b20(2+),y24(2+),y27(2+),y28(2+),	219.112796,290.149906,361.187016,409.219391,460.255426,522.303451,650.362031,876.457381,963.489411,1034.526521,1202.616391,1205.594916,1187.584352,1259.637851,1320.621856,1391.658966,1373.648402,1559.748836,650.362031,876.457381,963.489411,1356.690611,1391.658966,1559.748836,1651.843811,1687.807416,1982.960616,2457.204421,2782.343041,2879.395801,	7009	0	43.02	AFAAVPTSHPPEDAPAQPPTPGPAASPEQLSFR	5	3338.65	109.468	577	NA	NA	NA	0	0	0	0	1454	51.6256	109.468	14018	35.2459	74.222	0.00166924	11	3405
38	18	0.000000,0.000000,0.000008,0.000008,0.999984,	NA	NA	y4,y5,y5-H2O,y5-NH3,y6,y6-H2O,y6-NH3,b6,b7,y7,y7-H2O,y7*,y8,y8-H2O,y8-NH3,y8,y8*,y9,y9-H2O,b9,b9-H2O,y10,y10-H2O,y10*,b11,b11-NH3,y11,y11*,b12,b12-H2O,y12,y12*,b13,y14,y14-NH3,y14*,b14,b14*,b16,b16-NH3,b16*,b17,b17-NH3,b17*,	358.208481,487.251071,469.240506,470.224522,584.303831,566.293266,567.277282,644.324976,731.357006,751.302192,733.291627,653.306922,784.419921,766.409356,767.393372,864.386252,766.390982,913.462511,895.451946,931.473096,913.462532,1149.529952,1131.519387,1051.534682,1202.601146,1185.574597,1264.556892,1166.561622,1331.643736,1313.633172,1377.640952,1279.645682,1444.727796,1551.705012,1534.678463,…	7190	0	43.66	NSLESISSIDRELSPEGPGK	2	2195.02	83.3579	577	Phosphorylation(1)	NA	NA	1	1	0	0	1184	50.7335	83.3579	14380	41.7957	41.5622	0.00423852	15	3597
43	25	0.000000,0.000000,0.000008,0.000043,0.999948,	NA	NA	b3,b3-H2O,b3-NH3,b4,b4-NH3,b5,b5-H2O,y5,y6,y6-NH3,y8,y10,b10,b10,b11,y11,b12,b12-H2O,y12,b13,b13*,b7(2+),y8(2+),y9(2+),y10(2+),y12(2+),b14(2+),y15(2+),y16(2+),y17(2+),y18(2+),y19(2+),y20(2+),b21(2+),y21(2+),	315.166296,297.155732,298.139747,444.208886,427.182337,531.240916,513.230352,558.324571,615.346031,598.319482,841.441381,1121.523802,1126.466367,1126.466367,1202.601146,1250.566392,1331.643736,1313.633172,1406.667502,1524.694127,1426.698857,731.357006,841.441381,1008.439742,1121.523802,1406.667502,1611.726157,1721.810532,1808.842562,1921.926622,2008.958652,2138.001242,2251.085302,2306.054737,2338…	6510	0	41.2	NSLESISSIDRELSPEGPGKEK	3	2452.16	140.05	577	Phosphorylation(1)	NA	NA	1	2	0	0	1371	51.3704	140.05	13020	57.8879	82.1619	4.23762704656733e-09	0	1559
42	21	0.000000,0.000043,0.001233,0.001233,0.997491,	NA	NA	y2,b3,b3-H2O,b3-NH3,b4,y5,y6,y6-H2O,y8,b9,b9*,b10,b12,y12,y12-NH3,b13,b13-NH3,y13,b13,b13-NH3,y15,b16,b16-NH3,y8(2+),y11(2+),y15(2+),y16(2+),y17(2+),b18(2+),y18(2+),y19(2+),y20(2+),b21(2+),	276.155391,315.166296,297.155732,298.139747,444.208886,558.324571,615.346031,597.335466,841.441381,1011.439427,913.444157,1126.466367,1331.643736,1406.667502,1389.640953,1444.727796,1427.701247,1521.694442,1524.694127,1507.667578,1641.844201,1837.821507,1820.794958,841.441381,1250.566392,1721.810532,1808.842562,1921.926622,1991.895727,2008.958652,2138.001242,2251.085302,2306.054737,	6421	0	40.87	NSLESISSIDRELSPEGPGKEK	3	2452.16	101.818	577	Phosphorylation(1)	NA	NA	1	2	0	0	1368	51.3609	101.818	12842	51.531	50.2866	0.00619024	19	3637
43	23	NA	NA	NA	b2,y2,y2-NH3,b3,y3,y3-NH3,b4,y4,b5,b5-H2O,b5-NH3,y5,y5-H2O,y6,y12,b4(2+),b9(2+),y8(2+),y9(2+),y12(2+),y13(2+),y15(2+),b16(2+),b17(2+),y17(2+),y18(2+),y19(2+),y20(2+),	227.175396,288.203011,271.176462,356.217986,359.240121,342.213572,455.286396,488.282711,569.329326,551.318762,552.302777,587.351121,569.340556,658.388231,1318.649801,455.286396,909.540366,924.489731,1061.548641,1318.649801,1446.708381,1630.829551,1697.860516,1768.897626,1786.919421,1900.962351,2000.030761,2129.073351,	6546	0	41.34	LLEVNGVALQGAEHHEAVEALR	3	2355.24	118.908	577	NA	NA	NA	0	0	0	0	1142	50.5767	118.908	13092	43.3056	75.6025	0.00195396	11	3423
16	14	1.000000,	NA	NA	y1,b2,y2,y2-NH3,b3,b3-NH3,y3,y3-H2O,y3-NH3,y4,y4-H2O,b4,y5,y5-H2O,y5-NH3,b5,b5-H2O,b6,b6-H2O,b6-NH3,y6,y6-H2O,y6-NH3,b7,b7-H2O,b7-NH3,y7,b8,b8-H2O,b8-NH3,	175.118951,240.134267,274.187361,257.160812,403.197597,386.171048,403.229951,385.219386,386.203402,516.314011,498.303446,550.266007,645.356601,627.346036,628.330052,679.308597,661.298033,792.392657,774.382093,775.366108,792.425011,774.414446,775.398462,921.435247,903.424683,904.408698,955.488341,1020.503657,1002.493093,1003.477108,	7389	0	44.36	QKYFELEVR	2	1194.62	120.059	577	Pyro-glu from Q(1)	NA	NA	1	1	0	0	528	47.2263	120.059	14778	56.8904	63.1686	4.09405179376253e-08	1	1783
20	15	NA	NA	NA	y1,b2,b2-NH3,b3,b3-H2O,b3-NH3,y3,b4,y4,b5,b5-H2O,y5,b6,b6-H2O,y6,y7,b8,b8-H2O,b8-NH3,y8,y9,y9-H2O,y9-NH3,b10,b10-H2O,b10-NH3,	175.118951,228.134266,211.107717,315.166296,297.155732,298.139747,401.214301,412.219056,472.251411,541.261646,523.251082,569.304171,638.314406,620.303842,666.356931,795.399521,806.404276,788.393712,789.377727,892.452281,979.484311,961.473746,962.457762,1032.499626,1014.489062,1015.473077,	2107	0	25.19	VQSPEPPAPER	2	1206.61	110.231	577	NA	NA	NA	0	0	0	0	582	47.6492	110.231	4214	42.1236	68.1077	0.00209648	11	3433
20	15	NA	NA	NA	y1,b2,b2-NH3,b3,b3-H2O,b3-NH3,y3,b4,b4-H2O,b4-NH3,y4,b5,b5-H2O,y5,b6,y6,y6-H2O,y6-NH3,y7,y7-H2O,y7-NH3,b8,b8-H2O,b8-NH3,y8,y9,y9-H2O,y9-NH3,b10,b10-H2O,b10-NH3,	175.118951,228.134266,211.107717,315.166296,297.155732,298.139747,401.214301,412.219056,394.208492,395.192507,472.251411,541.261646,523.251082,569.304171,638.314406,666.356931,648.346366,649.330382,795.399521,777.388956,778.372972,806.404276,788.393712,789.377727,892.452281,979.484311,961.473746,962.457762,1032.499626,1014.489062,1015.473077,	2206	0	25.55	VQSPEPPAPER	2	1206.61	110.231	577	NA	NA	NA	0	0	0	0	581	47.6418	110.231	4412	29.3102	80.9211	0.00209648	11	3435
20	15	NA	NA	NA	b2,b2-H2O,y2,y2-H2O,y2-NH3,b3,b3-H2O,y3,b4,b4-H2O,y4,b5,b5-H2O,y6,b7,b7-H2O,y7,y7-H2O,b8,b8-H2O,y8,b9,b9-H2O,y9,y9-H2O,y9-NH3,b10,b10-H2O,	213.086976,195.076412,234.144831,216.134266,217.118282,314.134656,296.124092,347.228891,429.161596,411.151032,494.297301,558.204186,540.193622,664.402821,728.309706,710.299142,793.445411,775.434846,875.378116,857.367552,908.472351,988.462176,970.451612,1009.520031,991.509466,992.493482,1075.494206,1057.483642,	5854	0	38.85	DPTDEGIFISK	2	1221.6	110.231	577	NA	NA	NA	0	0	0	0	653	48.1491	110.231	11708	37.6081	72.6232	0.00209648	11	3456
20	15	NA	NA	NA	b2,b2-H2O,y2,y2-H2O,y2-NH3,b3,b3-H2O,y3,y3-H2O,b4,b4-H2O,y4,y4-H2O,b5,b5-H2O,y6,b7,b7-H2O,y7,y7-H2O,y7-NH3,b8,y8,y8-H2O,y8-NH3,b9,b9-H2O,y9,y9-H2O,y9-NH3,b10,	213.086976,195.076412,234.144831,216.134266,217.118282,314.134656,296.124092,347.228891,329.218326,429.161596,411.151032,494.297301,476.286736,558.204186,540.193622,664.402821,728.309706,710.299142,793.445411,775.434846,776.418862,875.378116,908.472351,890.461786,891.445802,988.462176,970.451612,1009.520031,991.509466,992.493482,1075.494206,	5949	0	39.18	DPTDEGIFISK	2	1221.6	110.231	577	NA	NA	NA	0	0	0	0	695	48.4198	110.231	11898	42.9947	67.2367	0.00209648	11	3457
20	15	NA	NA	NA	b2,b2-H2O,y3,b4,b5,y4,b6,b6-H2O,y5,b7,b7-H2O,y6,y7,b8,y8,y8-H2O,b9,y9,b10,	201.123366,183.112802,359.265271,369.213236,456.245266,506.333681,569.329326,551.318762,593.365711,656.361356,638.350792,706.449771,793.481801,803.429766,864.518911,846.508346,916.513826,961.571671,1015.582236,	9521	0	52.23	SLPASLSFLVK	2	1161.69	110.231	577	NA	NA	NA	0	0	0	0	313	44.9554	110.231	19042	37.4146	72.8168	0.00209648	11	3468
24	16	NA	NA	NA	b2,b3,b4,b5,y5,y5-NH3,y6,y7,b7,y8,y9,y9-H2O,y9-NH3,b10,y10,b11,b11-H2O,y11,b12,y12,y12-NH3,	211.144096,324.228156,437.312216,534.364976,539.329991,522.303442,626.362021,755.404611,760.460326,852.457371,949.510131,931.499566,932.483582,1001.566576,1062.594191,1098.619336,1080.608772,1175.678251,1211.703396,1272.731011,1255.704462,	8527	0	48.4	LPLLPPESPGPLR	2	1385.82	104.764	577	NA	NA	NA	0	0	0	0	355	45.5023	104.764	17054	32.9711	71.7929	0.00233231	11	3513
24	16	NA	NA	NA	b2,y2,b3,b4,b5,y5,y6,y7,b7,b7-H2O,b8,y8,y9,y9-H2O,y9-NH3,b10,y10,y10-H2O,y11,b12,	211.144096,288.203011,324.228156,437.312216,534.364976,539.329991,626.362021,755.404611,760.460326,742.449762,847.492356,852.457371,949.510131,931.499566,932.483582,1001.566576,1062.594191,1044.583626,1175.678251,1211.703396,	8624	0	48.78	LPLLPPESPGPLR	2	1385.82	104.764	577	NA	NA	NA	0	0	0	0	352	45.4654	104.764	17248	32.9711	71.7929	0.00233231	11	3514
57	24	NA	NA	NA	y3,y5,y5-NH3,b6,b6-H2O,y6,y7,y8,b11,y11,b12,b14,b15,y8(2+),b10(2+),b11(2+),b12(2+),b17(2+),y17(2+),b18(2+),y18(2+),b19(2+),b20(2+),b21(2+),y23(2+),b26(2+),	347.228891,573.324241,556.297692,607.344966,589.334402,686.408301,815.450891,912.503651,1240.639436,1254.657581,1339.707846,1581.834496,1696.861436,912.503651,1127.555376,1240.639436,1339.707846,1882.961876,1954.012721,2039.062986,2053.081131,2153.105916,2268.132856,2381.216916,2686.375601,2946.491676,	13667	0	72.19	LPPEVANFMQLVELDVSRNDIPEIPESIK	4	3292.71	95.656	577	NA	NA	NA	0	1	0	0	1234	50.9132	95.656	27334	44.5709	51.085	0.00247324	12	3524
44	23	NA	NA	NA	b2,b3,y3,b4,y4,b5,y5,y6,b7,y7,b8,y8,y8-NH3,b9,y9,b4(2+),b8(2+),y10(2+),y15(2+),y16(2+),y17(2+),y18(2+),y19(2+),b20(2+),	185.128446,284.196856,346.183341,397.280916,417.220451,494.333676,516.288861,631.315801,720.429026,744.399861,833.513086,843.468271,826.441722,904.550196,980.527181,397.280916,833.513086,1093.611241,1632.845211,1745.929271,1874.971861,1972.024621,2069.077381,2120.174956,	9295	0	51.34	LAVLPPELAHTTELHVLDVAGNR	4	2465.36	116.131	577	NA	NA	NA	0	0	0	0	822	49.1487	116.131	18590	30.068	86.0635	0.00274185	12	3544
30	22	1.000000,	NA	NA	b3,b3-H2O,b4,y3,y4,b5,b5-H2O,y5,b6,b6-H2O,y6,y7,b7,y8,y9,b9,b9-H2O,b10,b10-H2O,y10,b11,y11,y11-NH3,b12,b12-H2O,b13,b13-H2O,b13-NH3,y12,b14,b15,b15-H2O,	296.124097,278.113533,367.161207,371.240121,442.277231,454.193237,436.182673,499.298691,551.245997,533.235433,556.320151,613.341611,648.298757,726.425671,823.478431,858.435577,840.425013,915.457037,897.446473,920.531191,972.478497,1017.583951,1000.557402,1029.499957,1011.489393,1100.537067,1082.526503,1083.510518,1104.615981,1197.589827,1296.658237,1278.647673,	5251	0	36.67	QSPASPPPLGGGAPVR	2	1470.77	155.817	577	Pyro-glu from Q(1)	NA	NA	1	0	0	0	814	49.1062	155.817	10502	47.3492	108.468	2.59022393101123e-23	0	311
30	21	0.033962,0.966038,	1.000000,	NA	y2,b2,b2-H2O,y3,b3,y4,y5,b5,b5-H2O,b5*,y6,y7,b6,b6-H2O,b6-NH3,b6*,y8,b7,y9,y10,b9,b9-H2O,b9-NH3,b9*,b10,b10*,y11,b11,b11*,b12,b13,b13-H2O,b13-NH3,b13*,y12,y12*,b15,b15-NH3,b15*,	274.187361,279.037668,261.027104,371.240121,376.090428,442.277231,499.298691,534.159568,516.149004,436.164298,556.320151,613.341611,631.212328,613.201764,614.185779,533.217058,726.425671,728.265088,823.478431,920.531191,938.401908,920.391344,921.375359,840.406638,995.423368,897.428098,1017.583951,1052.444828,954.449558,1109.466288,1180.503398,1162.492834,1163.476849,1082.508128,1184.582312,1086.5…	5514	0	37.64	QSPASPPPLGGGAPVR	2	1550.74	142.362	577	Phosphorylation(1)	Pyro-glu from Q(1)	NA	2	0	0	0	846	49.2737	142.362	11028	38.3221	104.04	4.21164624743814e-13	0	971
28	19	NA	NA	NA	y1,b2,y2,b3,y3,b4,y4,y5,y6,b7,b8,y3(2+),y4(2+),b5(2+),y5(2+),y6(2+),b7(2+),b8(2+),y9(2+),	175.118951,211.144096,288.203011,324.228156,385.255771,437.312216,442.277231,539.329991,626.362021,760.460326,847.492356,385.255771,442.277231,534.364976,539.329991,626.362021,760.460326,847.492356,949.510131,	8109	0	46.92	LPLLPPESPGPLR	3	1385.82	125.504	577	NA	NA	NA	0	0	0	0	345	45.3782	125.504	16218	44.4201	81.0843	0.00349241	13	3567
28	19	NA	NA	NA	y1,b2,y2,y2-NH3,b3,y3,b4,y4,y4-NH3,b5,y5,y5-NH3,y6,y6-H2O,y7,y7-NH3,b7,b8,b8-H2O,y5(2+),y6(2+),b6(2+),b7(2+),b8(2+),y9(2+),	175.118951,211.144096,288.203011,271.176462,324.228156,385.255771,437.312216,442.277231,425.250682,534.364976,539.329991,522.303442,626.362021,608.351456,755.404611,738.378062,760.460326,847.492356,829.481792,539.329991,626.362021,631.417736,760.460326,847.492356,949.510131,	8205	0	47.26	LPLLPPESPGPLR	3	1385.82	125.504	577	NA	NA	NA	0	0	0	0	355	45.5023	125.504	16410	46.8021	78.7022	0.00349241	13	3568
28	19	NA	NA	NA	y1,y1-NH3,b2,y2,b3,y3,b4,y4,b5,y5,y5-NH3,y6,y6-NH3,y7,y7-H2O,b7,b8,b8-H2O,y3(2+),b5(2+),y5(2+),y6(2+),b7(2+),b8(2+),	175.118951,158.092402,211.144096,288.203011,324.228156,385.255771,437.312216,442.277231,534.364976,539.329991,522.303442,626.362021,609.335472,755.404611,737.394046,760.460326,847.492356,829.481792,385.255771,534.364976,539.329991,626.362021,760.460326,847.492356,	8445	0	48.09	LPLLPPESPGPLR	3	1385.82	125.504	577	NA	NA	NA	0	0	0	0	345	45.3782	125.504	16890	34.9314	90.573	0.00349241	13	3569
30	19	1.000000,	NA	NA	b3,b3-H2O,b4,y3,y4,b5,b5-H2O,y5,y6,y6-NH3,y7,b7,y8,y8-NH3,y9,b9,b9-NH3,b10,b10-H2O,y10,y11,b12,b12-H2O,b12-NH3,b13,b13-H2O,y12,b15,b15-NH3,	296.124097,278.113533,367.161207,371.240121,442.277231,454.193237,436.182673,499.298691,556.320151,539.293602,613.341611,648.298757,726.425671,709.399122,823.478431,858.435577,841.409028,915.457037,897.446473,920.531191,1017.583951,1029.499957,1011.489393,1012.473408,1100.537067,1082.526503,1104.615981,1296.658237,1279.631688,	5151	0	36.29	QSPASPPPLGGGAPVR	2	1470.78	117.388	577	Pyro-glu from Q(1)	NA	NA	1	0	0	0	852	49.3044	117.388	10302	46.8354	70.5523	8.74004581468221e-10	0	1392
49	24	NA	NA	NA	y1,b2,b2-H2O,y2,b3,y3,y4,b5,b5-H2O,y5,y6,b7,y7,b9,b9-H2O,b16,b17,b18,y3(2+),y6(2+),b10(2+),y9(2+),y17(2+),b18(2+),b19(2+),b20(2+),b21(2+),	175.118951,201.123366,183.112802,232.140411,330.165956,345.224471,458.308531,514.250746,496.240182,557.376941,670.461001,698.335536,741.498111,852.409756,834.399192,1636.697266,1735.765676,1806.802786,345.224471,670.461001,949.462516,969.609111,1778.928251,1806.802786,1919.886846,2018.955256,2132.039316,	10440	0	55.96	SLEPSPSPGPQEEDGEVALVLLGR	4	2476.26	112.925	577	NA	NA	NA	0	0	0	0	1481	51.7056	112.925	20880	61.5774	51.348	0.00413752	15	3592
36	21	NA	NA	NA	y3,y4,b5,y5,y6,y7,y7-NH3,b8,b8-NH3,y8,b9,b10,b11,b12,b12,b7(2+),b10(2+),b11(2+),b12(2+),b14(2+),b16(2+),b17(2+),y17(2+),	361.219391,476.246331,536.307856,589.330391,718.372981,817.441391,800.414842,868.456306,851.429757,930.525451,999.496796,1127.555376,1240.639436,1339.707846,1339.707846,721.387896,1127.555376,1240.639436,1339.707846,1581.834496,1795.929846,1882.961876,1943.989491,	14614	0	78.06	LPPEVANFMQLVELDVSR	3	2057.07	119.068	577	NA	NA	NA	0	0	0	0	1284	51.0857	119.068	29228	60.8918	58.1758	0.0041584	15	3594
33	22	0.157895,0.842105,	NA	NA	y1,b2,b2-H2O,y3,b4,b4,y5,y6,y7,y8,b7,b7-H2O,b7-NH3,b7*,y9,b9,b9-H2O,b9-NH3,b10,y3(2+),y6(2+),y7(2+),b7(2+),b8(2+),b9(2+),y11(2+),b13(2+),y14(2+),y15(2+),	175.118951,216.097886,198.087322,371.240121,384.187756,464.154087,499.298691,556.320151,613.341611,726.425671,745.291637,727.281073,728.265088,647.296367,823.478431,955.428457,937.417893,938.401908,1012.449917,371.240121,556.320151,613.341611,745.291637,842.344397,955.428457,1017.583951,1197.529947,1352.672182,1439.704212,	4623	0	34.46	QSPASPPPLGGGAPVR	3	1567.76	141.93	577	Phosphorylation(1)	NA	NA	1	0	0	0	902	49.5521	141.93	9246	53.8781	88.0522	1.67460823671795e-08	0	1711
30	19	1.000000,1.000000,	NA	NA	b2,b2-H2O,b2,b2-H2O,y3,y4,b4,y5,y6,y7,y8,b6,y10,y11,b9,b9-H2O,b9-NH3,b10,b11,b11*,y12,y12*,b13,b13-H2O,b13-NH3,b13*,y14,y14*,b15,b15-H2O,b15-NH3,b15*,	296.064217,278.053653,296.064217,278.053653,371.240121,442.277231,464.154087,499.298691,556.320151,613.341611,726.425671,728.205208,920.531191,1017.583951,1035.394788,1017.384224,1018.368239,1092.416248,1149.437708,1051.442438,1184.582312,1086.587042,1277.496278,1259.485714,1260.469729,1179.501008,1352.672182,1254.676912,1473.617448,1455.606884,1456.590899,1375.622178,	4636	0	34.52	QSPASPPPLGGGAPVR	2	1647.73	117.388	577	Phosphorylation(2)	NA	NA	2	0	0	0	662	48.2086	117.388	9272	56.8904	60.4974	7.36852727323366e-07	2	2076
30	19	0.006549,0.993451,	1.000000,	NA	b4,b4-H2O,y3,y3-NH3,y4,y5,b5,b5*,y6,y7,b7,b7*,y9,y10,b9,b9-H2O,b9-NH3,b9*,b10,b10*,y11,b11,b11*,b12,b12-NH3,b12*,b13,b13-H2O,b13-NH3,b13*,y12,y12*,y13,b15,b15-H2O,b15*,	367.161207,349.150643,371.240121,354.213572,442.277231,499.298691,534.159568,436.164298,556.320151,613.341611,728.265088,630.269818,823.478431,920.531191,938.401908,920.391344,921.375359,840.406638,995.423368,897.428098,1017.583951,1052.444828,954.449558,1109.466288,1092.439739,1011.471018,1180.503398,1162.492834,1163.476849,1082.508128,1184.582312,1086.587042,1255.619422,1376.624568,1358.614004,…	5416	0	37.27	QSPASPPPLGGGAPVR	2	1550.73	117.388	577	Phosphorylation(1)	Pyro-glu from Q(1)	NA	2	0	0	0	824	49.1593	117.388	10832	46.8354	70.5523	7.36852727323366e-07	2	2077
33	21	0.500000,0.500000,	NA	NA	y1,b2,y3,y5,y6,y7,b6,b6-H2O,b6*,y8,b7,b7-H2O,b7-NH3,b7*,y9,b9,b9-H2O,b9-NH3,b10,b10-H2O,b10*,b13,y14,y3(2+),y6(2+),y7(2+),b7(2+),b8(2+),b9(2+),y11(2+),y14(2+),	175.118951,216.097886,371.240121,499.298691,556.320151,613.341611,648.238877,630.228313,550.243607,726.425671,745.291637,727.281073,728.265088,647.296367,823.478431,955.428457,937.417893,938.401908,1012.449917,994.439353,914.454647,1197.529947,1272.705851,371.240121,556.320151,613.341611,745.291637,842.344397,955.428457,1017.583951,1352.672182,	4518	0	34.06	QSPASPPPLGGGAPVR	3	1567.76	129.722	577	Phosphorylation(1)	NA	NA	1	0	0	0	944	49.7497	129.722	9036	85.8127	43.9088	4.40450718183611e-06	2	2378
30	16	0.000008,0.999992,	NA	NA	b2,b2-H2O,y3,y4,y5,y6,y7,y8,y9,y10,b9,b9-NH3,b9*,b10,b10-H2O,b10*,y11,y12,y12-H2O,y12-NH3,y12*,b13,b13-H2O,b13-NH3,b13*,y13,y14,y14*,b15,b15-NH3,	296.064217,278.053653,371.240121,442.277231,499.298691,556.320151,613.341611,726.425671,823.478431,920.531191,955.428457,938.401908,857.433187,1012.449917,994.439353,914.454647,1017.583951,1184.582312,1166.571747,1167.555763,1086.587042,1197.529947,1179.519383,1180.503398,1099.534677,1255.619422,1352.672182,1254.676912,1393.651117,1376.624568,	4493	0	33.99	QSPASPPPLGGGAPVR	2	1567.76	84.3682	577	Phosphorylation(1)	NA	NA	1	0	0	0	904	49.5617	84.3682	8986	46.8354	37.5327	0.00930253	22	3769
54	23	NA	NA	NA	y4,b5,y5,y6,y7,b11,b11-H2O,y10,y11,b13,b13-NH3,b16,y8(2+),y9(2+),y13(2+),y14(2+),y15(2+),y16(2+),y17(2+),y18(2+),y21(2+),y22(2+),y23(2+),b27(2+),y26(2+),	502.334751,506.224526,615.418811,716.466491,829.550551,1159.574196,1141.563632,1216.678321,1345.720911,1401.700846,1384.674297,1725.891826,958.593141,1087.635731,1614.906081,1685.943191,1782.995951,1912.038541,2025.122601,2138.206661,2479.376581,2550.413691,2678.472271,3009.577846,3027.599651,	12883	0	67.71	GVSFDQANNLLIEPARIEEEELTLTILR	3	3183.7	93.1623	577	NA	NA	NA	0	1	0	0	949	49.7727	93.1623	25766	45.1835	47.9788	0.00568404	17	3619
54	23	NA	NA	NA	y3,y3-NH3,y4,y4-H2O,y5,b7,b7-H2O,b7-NH3,y6,y7,b9,b9-NH3,y9,y9-H2O,b11,b11-NH3,y10,b12,b12-NH3,b13,b13-NH3,y15(2+),y16(2+),y17(2+),y18(2+),y19(2+),y20(2+),y21(2+),y22(2+),y23(2+),y24(2+),y25(2+),	401.287071,384.260522,502.334751,484.324186,615.418811,705.320216,687.309652,688.293667,716.466491,829.550551,933.406076,916.379527,1087.635731,1069.625166,1159.574196,1142.547647,1216.678321,1272.658256,1255.631707,1401.700846,1384.674297,1782.995951,1912.038541,2025.122601,2138.206661,2251.290721,2365.333651,2479.376581,2550.413691,2678.472271,2793.499211,2940.567621,	14668	0	78.52	GVSFDQANNLLIEPARIEEEELTLTILR	3	3183.69	93.1623	577	NA	NA	NA	0	1	0	0	979	49.9078	93.1623	29336	34.4725	58.6898	0.00568404	17	3620
54	23	NA	NA	NA	y3,y4,y4-NH3,y5,y6,y7,b11,b11-NH3,y10,b12,b12-NH3,y11,b13,y12,y12-H2O,y12-NH3,y13(2+),y15(2+),y16(2+),y17(2+),y18(2+),y19(2+),y20(2+),y21(2+),y22(2+),y23(2+),y24(2+),y25(2+),	401.287071,502.334751,485.308202,615.418811,716.466491,829.550551,1159.574196,1142.547647,1216.678321,1272.658256,1255.631707,1345.720911,1401.700846,1458.804971,1440.794406,1441.778422,1614.906081,1782.995951,1912.038541,2025.122601,2138.206661,2251.290721,2365.333651,2479.376581,2550.413691,2678.472271,2793.499211,2940.567621,	15097	0	81.8	GVSFDQANNLLIEPARIEEEELTLTILR	3	3183.69	93.1623	577	NA	NA	NA	0	1	0	0	996	49.9826	93.1623	30194	45.6537	47.5086	0.00568404	17	3621
54	23	NA	NA	NA	y4,b7,b7-NH3,y6,y7,y8,b10,b10-NH3,y9,y9-H2O,y9-NH3,y10,b13,b13-NH3,b15,y15(2+),y16(2+),y17(2+),y18(2+),b20(2+),y19(2+),b21(2+),y20(2+),y21(2+),y22(2+),y23(2+),y24(2+),y25(2+),	502.334751,705.320216,688.293667,716.466491,829.550551,958.593141,1046.490136,1029.463587,1087.635731,1069.625166,1070.609182,1216.678321,1401.700846,1384.674297,1569.790716,1782.995951,1912.038541,2025.122601,2138.206661,2226.103656,2251.290721,2355.146246,2365.333651,2479.376581,2550.413691,2678.472271,2793.499211,2940.567621,	15173	0	82.52	GVSFDQANNLLIEPARIEEEELTLTILR	3	3183.69	93.1623	577	NA	NA	NA	0	1	0	0	993	49.9695	93.1623	30346	28.2773	64.8851	0.00568404	17	3622
54	23	NA	NA	NA	y3,y5,b7,b7-NH3,y6,y7,y7-NH3,y8,y9,y9-H2O,y9-NH3,b11,b12,b12-NH3,b13,b13-NH3,y12,b8(2+),y14(2+),y15(2+),y16(2+),y17(2+),y18(2+),y19(2+),y20(2+),y21(2+),y22(2+),b24(2+),y24(2+),	401.287071,615.418811,705.320216,688.293667,716.466491,829.550551,812.524002,958.593141,1087.635731,1069.625166,1070.609182,1159.574196,1272.658256,1255.631707,1401.700846,1384.674297,1458.804971,819.363146,1685.943191,1782.995951,1912.038541,2025.122601,2138.206661,2251.290721,2365.333651,2479.376581,2550.413691,2682.362046,2793.499211,	15571	0	86.39	GVSFDQANNLLIEPARIEEEELTLTILR	3	3183.69	93.1623	577	NA	NA	NA	0	1	0	0	970	49.8677	93.1623	31142	37.5039	55.6584	0.00568404	17	3623
54	23	NA	NA	NA	y4,y4-H2O,b5,b5-H2O,y5,b6,b6-H2O,b6-NH3,y6,y7,b10,b10-NH3,y9,b12,b13,b13-H2O,y12,b15,b8(2+),y13(2+),y15(2+),y16(2+),y17(2+),y19(2+),y21(2+),y22(2+),y24(2+),b27(2+),y26(2+),	502.334751,484.324186,506.224526,488.213962,615.418811,634.283106,616.272542,617.256557,716.466491,829.550551,1046.490136,1029.463587,1087.635731,1272.658256,1401.700846,1383.690282,1458.804971,1569.790716,819.363146,1614.906081,1782.995951,1912.038541,2025.122601,2251.290721,2479.376581,2550.413691,2793.499211,3009.577846,3027.599651,	15955	0	90.49	GVSFDQANNLLIEPARIEEEELTLTILR	3	3183.7	93.1623	577	NA	NA	NA	0	1	0	0	947	49.7635	93.1623	31910	37.1458	56.0165	0.00568404	17	3624
79	29	NA	NA	NA	y5,b6,b6-H2O,y9,b10,b10-H2O,y10,y11,b12,y12,b13,y14,y15,b15,b15,y16,y17,b17,b18,b19,b19-H2O,y10(2+),y11(2+),y15(2+),y16(2+),y17(2+),y18(2+),y23(2+),y29(2+),y31(2+),y32(2+),b35(2+),	539.304841,573.287856,555.277292,925.500231,985.556416,967.545852,1039.543161,1110.580271,1203.592546,1223.664331,1260.614006,1379.754201,1476.806961,1536.725006,1536.725006,1563.838991,1662.907401,1694.794146,1795.841826,1910.868766,1892.858202,1039.543161,1110.580271,1476.806961,1563.838991,1662.907401,1791.949991,2263.182891,2869.411431,3071.489031,3184.573091,3418.672196,	14757	0	79.14	SVGDTLTVLVCDGFEASTDAALEVSPGVIANPFAAGIGHR	3	3956.98	96.7802	577	NA	NA	NA	0	0	0	0	1142	50.5767	96.7802	29514	32.8619	63.9183	0.0061325	19	3631
30	16	0.000043,0.999957,	NA	NA	b2,b2-H2O,y3,y3-NH3,y4,y5,y6,y7,y8,y8-NH3,y9,y10,b9,b9-H2O,b9-NH3,b9*,b10,b10-NH3,y11,y12,y12*,b13,b13-H2O,b13-NH3,b13*,y13,y13*,y14,y14*,b15,b15-H2O,b15-NH3,b15*,	296.064217,278.053653,371.240121,354.213572,442.277231,499.298691,556.320151,613.341611,726.425671,709.399122,823.478431,920.531191,955.428457,937.417893,938.401908,857.433187,1012.449917,995.423368,1017.583951,1184.582312,1086.587042,1197.529947,1179.519383,1180.503398,1099.534677,1255.619422,1157.624152,1352.672182,1254.676912,1393.651117,1375.640553,1376.624568,1295.655847,	4599	0	34.39	QSPASPPPLGGGAPVR	2	1567.76	84.3682	577	Phosphorylation(1)	NA	NA	1	0	0	0	886	49.4743	84.3682	9198	38.3221	46.0461	0.00930253	22	3770
18	14	NA	NA	NA	y1,y1-NH3,b2,y2,y2-NH3,b3,b3-H2O,y3,y4,y4-H2O,b5,b5-H2O,y5,y6,y6-H2O,y7,b8,b8-H2O,y8,b9,b9-H2O,y9,	175.118951,158.092402,201.086976,246.156061,229.129512,272.124086,254.113522,375.198651,446.235761,428.225196,472.203786,454.193222,503.257221,574.294331,556.283766,703.336921,729.304946,711.294382,774.374031,800.342056,782.331492,845.411141,	355	0	16.65	EAAEAGAEAR	2	974.453	106.844	577	NA	NA	NA	0	0	0	0	332	45.2114	106.844	710	56.8904	49.9532	0.00671396	20	3649
18	14	NA	NA	NA	y1,b2,y2,y2-NH3,b3,b3-H2O,b4,b4-H2O,y3,b5,b5-H2O,y5,b7,b7-H2O,y6,y7,y7-H2O,b8,b8-H2O,y8,y9,y9-H2O,	175.118951,187.107716,288.203011,271.176462,300.191776,282.181212,399.260186,381.249622,403.229951,456.281646,438.271082,589.294001,642.345696,624.335132,646.315461,745.383871,727.373306,757.372636,739.362072,858.467931,945.499961,927.489396,	5431	0	37.32	VSLVGADDLR	2	1044.57	106.844	577	NA	NA	NA	0	0	0	0	402	46.0423	106.844	10862	47.6423	59.2014	0.00671396	20	3678
18	14	NA	NA	NA	y1,b2,b2-H2O,y2,y2-NH3,b3,b3-H2O,b4,b4-H2O,y3,b5,b5-H2O,y5,y5-H2O,b7,y6,y7,y7-H2O,b8,y8,y9,y9-H2O,y9-NH3,	175.118951,187.107716,169.097152,288.203011,271.176462,300.191776,282.181212,399.260186,381.249622,403.229951,456.281646,438.271082,589.294001,571.283436,642.345696,646.315461,745.383871,727.373306,757.372636,858.467931,945.499961,927.489396,928.473412,	5531	0	37.7	VSLVGADDLR	2	1044.57	106.844	577	NA	NA	NA	0	0	0	0	438	46.4147	106.844	11062	46.8021	60.0415	0.00671396	20	3679
74	28	NA	NA	NA	b5,y5,y5-NH3,b6,b7,y7,b8,b9,y8,y9,b10,y10,b12,b12-H2O,b12,b12-H2O,y15,y15-NH3,b17,y17,y17-NH3,b18,b19,y11(2+),y15(2+),y20(2+),y21(2+),y23(2+),y26(2+),y27(2+),y28(2+),y29(2+),b32(2+),	565.298026,626.340891,609.314342,636.335136,735.403546,834.436911,834.471956,905.509066,931.489671,988.511131,1018.593126,1102.554061,1259.735766,1241.725202,1259.735766,1241.725202,1636.787961,1619.761412,1787.935996,1806.893481,1789.866932,1844.957456,1974.000046,1239.612971,1636.787961,2090.010291,2147.031751,2359.111451,2675.231981,2803.290561,2916.374621,3029.458681,3237.589746,	11544	0	61.15	LPQPEAVVALLQGMQPDGEGPVAPGGWHNGPHAPWAPR	3	3933.96	97.2684	577	NA	NA	NA	0	0	0	0	1234	50.9132	97.2684	23088	37.7737	59.4947	0.0073728	22	3710
24	18	1.000000,	NA	NA	y2,y3,b3,b4,y4,b5,y5,b6,b6-H2O,y6,b7,b7-H2O,y7,y7-H2O,b8,b8-H2O,y8,b9,b9-H2O,b9-NH3,y9,b10,b11,b11-H2O,b12,	204.134261,261.155721,270.108447,327.129907,332.192831,440.213967,445.276891,497.235427,479.224863,532.308921,610.319487,592.308923,645.392981,627.382416,697.351517,679.340953,702.414441,810.435577,792.425013,793.409028,815.498501,881.472687,938.494147,920.483583,995.515607,	7027	0	43.08	QTGGLGISIAGGK	2	1141.62	131.301	577	Pyro-glu from Q(1)	NA	NA	1	0	0	0	534	47.2754	131.301	14054	37.6081	93.6931	6.50934023316684e-13	0	993
14	12	NA	NA	NA	y1,b2,y2,b3,b3-H2O,y3,y3-NH3,y4,b5,y5,b6,b6-H2O,y6,y6-H2O,y6-NH3,b7,b7-H2O,y7,y7-NH3,	175.118951,237.134596,303.213911,366.177186,348.166622,418.240851,401.214302,517.309261,552.277626,604.341291,667.304566,649.294002,733.383881,715.373316,716.357332,795.399526,777.388962,832.452291,815.425742,	69	0	10.32	HVESVDKR	2	969.511	101.251	577	NA	NA	NA	0	1	0	0	324	45.1054	101.251	138	37.4146	63.836	0.00842548	22	3726
22	15	NA	NA	NA	b2,y2,b3,y3,b4,b4-H2O,y4,y5,y5-H2O,b5,y6,b6,y7,b8,b8-H2O,y8,y8-H2O,y9,y10,	243.133926,288.203011,372.176516,401.287071,501.219106,483.208542,502.334751,615.418811,597.408246,630.261696,716.466491,743.345756,829.550551,957.477496,939.466932,958.593141,940.582576,1087.635731,1216.678321,	16179	0	95.53	IEEEELTLTILR	2	1458.8	100.67	577	NA	NA	NA	0	0	0	0	618	47.9099	100.67	32358	30.5616	70.1087	0.00901377	22	3763
24	16	1.000000,	NA	NA	b2,b2-H2O,y3,b4,y4,b5,b5-H2O,y5,b6,b6-H2O,y6,b7,b7-H2O,y7,b8,b8-H2O,y8,b9,b9-H2O,b9-NH3,y9,b10,b11,b11-NH3,	213.086987,195.076423,261.155721,327.129907,332.192831,440.213967,422.203403,445.276891,497.235427,479.224863,532.308921,610.319487,592.308923,645.392981,697.351517,679.340953,702.414441,810.435577,792.425013,793.409028,815.498501,881.472687,938.494147,921.467598,	7126	0	43.44	QTGGLGISIAGGK	2	1141.62	104.764	577	Pyro-glu from Q(1)	NA	NA	1	0	0	0	534	47.2754	104.764	14252	28.3149	76.4491	8.78599966607676e-06	2	2484
23	17	1.000000,	NA	NA	b1,y1,b2,y2,y3,y4,b4,b4-H2O,b4-NH3,b4*,y5,b5,b5*,y6,y6-H2O,b6,b6*,b7,y4(2+),y5(2+),b5(2+),y6(2+),b9(2+),	157.108386,175.118951,256.176796,288.203011,403.229951,518.256891,536.259217,518.248653,519.232668,438.263947,589.294001,635.327627,537.332357,646.315461,628.304896,692.349087,594.353817,763.386197,518.256891,589.294001,635.327627,646.315461,993.440077,	5144	0	36.28	RVSLVGADDLR	3	1280.64	122.542	577	Phosphorylation(1)	NA	NA	1	1	0	0	683	48.3442	122.542	10288	52.2736	70.2683	5.61680222134566e-05	5	2718
57	25	NA	NA	NA	y4,y6,y7,y8,y8-H2O,b8,b9,b10,b10-H2O,y10,b11,y11,y11-H2O,b12,y12,b13,y13,b15,b16,b17,b17-H2O,b17-NH3,b10(2+),y11(2+),b12(2+),b16(2+),y19(2+),y20(2+),b20(2+),y24(2+),	460.251421,644.336211,731.368241,802.405351,784.394786,813.435236,870.456696,999.499286,981.488722,1085.537421,1128.541876,1182.590181,1164.579616,1257.584466,1310.648761,1385.643046,1439.691351,1629.712576,1758.755166,1886.813746,1868.803182,1869.787197,999.499286,1182.590181,1257.584466,1758.755166,2198.947231,2255.968691,2266.998576,2656.164481,	8371	0	47.86	LALDGETLGEEEQEDEQPPWASPSPTSR	3	3068.4	104.042	577	NA	NA	NA	0	0	0	0	876	49.425	104.042	16742	35.4497	68.5918	0.0100577	22	3775
63	41	0.033962,0.966038,0.000000,	NA	NA	b4,y3,b5,b5-H2O,y4,b6,b6-H2O,y5,b7,y6,b8,y7,b9,b9,y8,y9,b10,b10-NH3,y10,y10-NH3,y11,b12,y12,y13,b15,y14,b15,b15-NH3,y15,y16,y16-NH3,b17,b17-H2O,b17-NH3,b17,b17-H2O,b17-NH3,y16,y16-H2O,b18,y17,y18,y19,y19-NH3,y7(2+),y8(2+),y11(2+),b12(2+),b13(2+),y13(2+),b14(2+),y13(2+),b14(2+),b15(2+),y16(2+),y16(2+),b18(2+),b21(2+),y21(2+),b22(2+),y22(2+),y23(2+),y24(2+),y25(2+),y26(2+),b28(2+),	409.219386,417.245601,522.303446,504.292882,530.329661,593.340556,575.329992,631.377341,706.424616,730.445751,820.467546,843.529811,935.494486,957.476429,957.572741,1028.609851,1034.562896,1017.536347,1141.693911,1124.667362,1255.736841,1256.660929,1312.758301,1411.826711,1546.858736,1548.835594,1568.840679,1551.814130,1583.875111,1680.927871,1663.901322,1700.932956,1682.922392,1683.906407,1700.9…	14018	0	74.2	SLAHLALNDVSLQALPGDVGNLANLVTLELR	3	3248.76	252.587	577	Sodium adduct(1)	NA	NA	1	0	0	0	727	48.6153	252.587	28036	45.1835	207.403	1.43378852127628e-53	0	37
43	22	NA	NA	NA	y1,b2,b3,y3,y3-NH3,b4,y6,y8,b4(2+),b8(2+),b9(2+),y9(2+),y10(2+),y11(2+),y12(2+),y13(2+),y14(2+),y15(2+),y16(2+),y17(2+),y18(2+),y19(2+),b20(2+),	175.118951,227.175396,356.217986,359.240121,342.213572,455.286396,658.388231,924.489731,455.286396,796.456306,909.540366,1061.548641,1190.591231,1261.628341,1318.649801,1446.708381,1559.792441,1630.829551,1729.897961,1786.919421,1900.962351,2000.030761,2068.045736,	6458	0	41.01	LLEVNGVALQGAEHHEAVEALR	4	2355.24	108.929	577	NA	NA	NA	0	0	0	0	1148	50.5994	108.929	12916	39.0388	69.89	0.0119084	23	3796
30	19	NA	NA	NA	b2,b3,y3,y3-NH3,y4,y5,b6,b6-H2O,b6-NH3,y6,y6-H2O,b7,b7-NH3,y7,b8,y8,b9,b9-NH3,y9,y5(2+),b7(2+),y7(2+),y8(2+),b10(2+),y12(2+),	243.108786,356.192846,402.245941,385.219392,459.267401,572.351461,627.346046,609.335482,610.319497,701.394051,683.383486,724.398806,707.372257,798.446811,821.451566,895.499571,950.494156,933.467607,1008.583631,572.351461,724.398806,798.446811,895.499571,1063.578216,1279.736831,	8304	0	47.6	NQLSALPPELGNLR	3	1521.84	117.388	577	NA	NA	NA	0	0	0	0	753	48.7679	117.388	16608	34.9314	82.4564	0.0123887	23	3802
56	23	NA	NA	NA	b3,y2,y2-NH3,y3,y4,y4-NH3,y5,y5-H2O,y5-NH3,y6,y6-H2O,y7,b10,b11,b11-NH3,b12,b13,b13-H2O,y7(2+),b10(2+),b11(2+),b12(2+),y15(2+),y16(2+),b18(2+),y17(2+),b20(2+),b21(2+),b22(2+),b23(2+),	244.129176,288.203011,271.176462,401.287071,502.334751,485.308202,615.418811,597.408246,598.392262,716.466491,698.455926,829.550551,1046.490136,1159.574196,1142.547647,1272.658256,1401.700846,1383.690282,829.550551,1046.490136,1159.574196,1272.658256,1782.995951,1912.038541,1968.018476,2025.122601,2226.103656,2355.146246,2468.230306,2569.277986,	14521	0	77.43	GVSFDQANNLLIEPARIEEEELTLTILR	4	3183.7	89.3824	577	NA	NA	NA	0	1	0	0	916	49.619	89.3824	29042	39.1658	50.2166	0.0127947	23	3803
64	39	0.033962,0.966038,0.000000,	NA	NA	b4,b5,b5-H2O,y4,b6,y5,y5-NH3,b7,b7-H2O,y6,b8,b8-NH3,y7,b9,b9,y8,y9,b10,b10-NH3,b11,y10,b12,b12-H2O,y11,b12,y12,y13,b14,b15,b15,y15,y16,y16-H2O,y16-NH3,b18,b18-NH3,y17,y17-NH3,b20,b9(2+),y8(2+),y12(2+),b13(2+),y13(2+),b14(2+),b15(2+),y15(2+),y16(2+),b17(2+),b18(2+),y18(2+),b19(2+),y19(2+),y21(2+),y22(2+),y23(2+),y24(2+),b26(2+),y25(2+),y26(2+),y27(2+),b29(2+),	409.219386,522.303446,504.292882,530.329661,593.340556,631.377341,614.350792,706.424616,688.414052,730.445751,820.467546,803.440997,843.529811,935.494486,957.476429,957.572741,1028.609851,1034.562896,1017.536347,1121.594926,1141.693911,1234.678986,1216.668422,1255.736841,1256.660929,1312.758301,1411.826711,1455.756619,1546.858736,1568.840679,1583.875111,1680.927871,1662.917306,1663.901322,1815.95…	14071	0	74.54	SLAHLALNDVSLQALPGDVGNLANLVTLELR	3	3248.76	225.096	577	Sodium adduct(1)	NA	NA	1	0	0	0	721	48.5794	225.096	28142	50.3139	174.783	3.42186628285713e-40	0	82
63	30	0.000043,0.993408,0.006548,	NA	NA	y2,y3,y3-NH3,y4,y4,y5,y6,y7,b9,b9,y8,y9,b10,b10-NH3,b11,b11-H2O,b11-NH3,b12,b12-H2O,b12-NH3,y12,y12-H2O,b14,b14-H2O,y13,y13-H2O,y14,y14-H2O,b16,y5(2+),b9(2+),b11(2+),b13(2+),b14(2+),y13(2+),b15(2+),b15(2+),y15(2+),y16(2+),y16(2+),b18(2+),y17(2+),y18(2+),y19(2+),b21(2+),y21(2+),y22(2+),b24(2+),b25(2+),	288.203011,417.245601,400.219052,530.329661,552.311604,631.377341,730.445751,843.529811,935.494486,957.476429,957.572741,1028.609851,1034.562896,1017.536347,1121.594926,1103.584362,1104.568377,1234.678986,1216.668422,1217.652437,1334.740244,1316.729679,1433.774676,1415.764112,1433.808654,1415.798089,1548.835594,1530.825029,1643.911496,631.377341,935.494486,1121.594926,1362.737566,1433.774676,1433…	14015	0	74.19	SLAHLALNDVSLQALPGDVGNLANLVTLELR	4	3248.77	135.209	577	Sodium adduct(1)	NA	NA	1	0	0	0	728	48.6213	135.209	28030	41.3172	93.8918	4.31072232102319e-10	0	1339
31	18	NA	NA	NA	y1,y2,y3,y4,y6,y7,y7-NH3,b10,y9,y9-NH3,b11,y10,b12,y4(2+),y5(2+),y6(2+),b12(2+),b13(2+),b14(2+),y13(2+),	175.118951,262.150981,375.235041,522.303451,692.408971,821.451561,804.425012,1050.437426,1051.505441,1034.478892,1107.458886,1108.526901,1220.542946,522.303451,635.387511,692.408971,1220.542946,1367.611356,1480.695416,1496.737951,	5101	0	36.14	GSTPYKGDDEGIFISR	3	1741.84	102.465	577	NA	NA	NA	0	1	0	0	1028	50.1199	102.465	10202	49.3252	53.1394	0.0139404	24	3822
63	28	0.006549,0.993451,0.000000,	NA	NA	y2,y2-NH3,y3,y3-H2O,y3-NH3,y4,y4-NH3,b6,y5,y6,y7,b9,b9,y8,y9,y9-H2O,b10,b11,b11-H2O,b11-NH3,y12,b13,b15,b15-H2O,b15-NH3,b15,b9(2+),b11(2+),b12(2+),y12(2+),b13(2+),b14(2+),y13(2+),b15(2+),y14(2+),b15(2+),y16(2+),y16(2+),y19(2+),b21(2+),b22(2+),y21(2+),b24(2+),b28(2+),	288.203011,271.176462,417.245601,399.235036,400.219052,530.329661,513.303112,593.340556,631.377341,730.445751,843.529811,935.494486,957.476429,957.572741,1028.609851,1010.599286,1034.562896,1121.594926,1103.584362,1104.568377,1312.758301,1362.737566,1546.858736,1528.848172,1529.832187,1568.840679,935.494486,1121.594926,1234.678986,1334.740244,1362.737566,1433.774676,1433.808654,1546.858736,1548.8…	14070	0	74.54	SLAHLALNDVSLQALPGDVGNLANLVTLELR	4	3248.77	117.407	577	Sodium adduct(1)	NA	NA	1	0	0	0	729	48.6273	117.407	28140	36.4597	80.9477	1.30928490427292e-06	2	2178
61	23	0.999768,0.999768,0.000463,	NA	NA	b4,b5,b5-H2O,b6,y5,b7,y7,b9,b9-NH3,y8,y8-NH3,b10,b10-H2O,b10-NH3,b12,b12-NH3,y11,y12,y12,y12-H2O,y12-NH3,y13,y13-H2O,y13-NH3,y14,y14-H2O,b15,b16,b16,b18,b18-H2O,y17,y17-H2O,y18,b19,b19-NH3,b20,b20-NH3,b9(2+),y8(2+),b13(2+),y13(2+),b14(2+),y13(2+),b14(2+),y16(2+),b18(2+),b22(2+),b23(2+),b26(2+),b29(2+),	409.219386,522.303446,504.292882,593.340556,631.377341,706.424616,843.529811,957.476429,940.449880,957.572741,940.546192,1034.562896,1016.552332,1017.536347,1256.660929,1239.634380,1277.718784,1312.758301,1334.740244,1316.729679,1317.713695,1411.826711,1393.816146,1394.800162,1548.835594,1530.825029,1568.840679,1643.911496,1665.893439,1837.941839,1819.931275,1837.975817,1819.965252,1909.012927,19…	14076	0	74.55	SLAHLALNDVSLQALPGDVGNLANLVTLELR	3	3270.75	80.8149	577	Sodium adduct(2)	NA	NA	2	0	0	0	916	49.619	80.8149	28152	35.2459	45.5691	0.0334482	27	4112
26	24	0.028754,0.153355,0.817891,	NA	NA	y1,y1-NH3,b2,b2-H2O,y2,y2-NH3,b3,b3-H2O,y3,y3-NH3,y4,b5,b5-H2O,b5,y5,b6,y6,b7,b7,y7,y7,b8,b9,b11,y4(2+),y5(2+),y6(2+),y6(2+),y7(2+),y7(2+),b8(2+),y8(2+),b9(2+),y9(2+),y10(2+),y11(2+),y12(2+),	175.118951,158.092402,201.123366,183.112802,288.203011,271.176462,330.165956,312.155392,416.261591,399.235042,530.304521,572.292606,554.282042,594.274549,601.341631,707.358609,716.368571,798.460726,820.442669,829.452631,851.434574,935.469609,1006.506719,1248.608229,530.304521,601.341631,716.368571,738.350514,829.452631,851.434574,935.469609,964.518634,1006.506719,1077.602694,1206.645284,1335.6878…	10837	0	57.87	SLEELLLDANQLR	3	1535.8	215.758	577	Sodium adduct(1)	NA	NA	1	0	0	0	821	49.1434	215.758	21674	66.087	149.671	1.27816610309304e-30	0	159
26	23	1.000000,	NA	NA	y1,b2,b2-H2O,y2,y4,b5,b5-H2O,y5,b6,y6,b7,y7,b8,y8,y8-H2O,y9,b11,b6(2+),y6(2+),b7(2+),y7(2+),b8(2+),y9(2+),y10(2+),y11(2+),y12(2+),	175.118951,201.123366,183.112802,288.203011,513.277972,572.292606,554.282042,584.315082,685.376666,699.342022,798.460726,812.426082,913.487666,925.510142,907.499577,1038.594202,1209.599737,685.376666,699.342022,798.460726,812.426082,913.487666,1038.594202,1167.636792,1296.679382,1409.763442,	10864	0	57.98	SLEELLLDANQLR	3	1496.79	197.163	577	Pyro-glu from Q(1)	NA	NA	1	0	0	0	776	48.8986	197.163	21728	63.3015	133.861	1.27966146027281e-23	0	304
24	19	0.964886,0.033922,0.001193,	NA	NA	y2,y2-NH3,b3,b3-H2O,b3,y3,b4,b4-H2O,b4,y4,y4-NH3,b5,y5,y5-NH3,b6,b6,y6,y6-NH3,b7,y7,y7,y7-H2O,y7-NH3,b8,b8-H2O,y8,y9,b10,y10,y10-H2O,b11,b11-NH3,y11,y11-NH3,b12,	288.203011,271.176462,330.165956,312.155392,352.147899,416.261591,459.208546,441.197982,481.190489,530.304521,513.277972,594.274549,601.341631,584.315082,685.376666,707.358609,716.368571,699.342022,820.442669,829.452631,851.434574,833.424009,834.408025,935.469609,917.459045,942.536691,1055.620751,1120.549649,1184.663341,1166.652776,1248.608229,1231.581680,1335.687874,1318.661325,1361.692289,	10842	0	57.91	SLEELLLDANQLR	2	1535.8	145.882	577	Sodium adduct(1)	NA	NA	1	0	0	0	856	49.3247	145.882	21684	38.3221	107.56	5.35395496719787e-18	0	553
24	17	1.000000,	NA	NA	y2,b3,b3-H2O,y3,b4,b4-H2O,y4,b5,y5,y5-NH3,b6,b6-H2O,y6,y6-H2O,y6-NH3,b7,y7,y7-NH3,b8,y8,y8-NH3,b9,y9,b11,b11-H2O,b12,b12-NH3,	288.203011,358.160871,340.150307,416.261591,487.203461,469.192897,530.304521,600.287521,601.341631,584.315082,713.371581,695.361017,716.368571,698.358006,699.342022,826.455641,829.452631,812.426082,941.482581,942.536691,925.510142,1012.519691,1055.620751,1254.621201,1236.610637,1367.705261,1350.678712,	13471	0	71.21	SLEELLLDANQLR	2	1541.82	117.621	577	Formylation(1)	NA	NA	1	0	0	0	823	49.154	117.621	26942	56.0908	61.53	6.78764639883022e-09	0	1613
35	20	NA	NA	NA	b2,y3,y3-H2O,y3-NH3,y4,y4-H2O,y5,b6,b6-H2O,y6,y6-NH3,y7,b8,b8-NH3,y8,b9,b9-NH3,y9,b10,y10,y10-H2O,b11,b7(2+),b9(2+),b11(2+),b12(2+),b13(2+),b14(2+),	211.144096,361.219391,343.208826,344.192842,476.246331,458.235766,589.330391,607.344966,589.334402,718.372981,701.346432,817.441391,868.456306,851.429757,930.525451,999.496796,982.470247,1058.584031,1127.555376,1189.624521,1171.613956,1240.639436,721.387896,999.496796,1240.639436,1339.707846,1468.750436,1581.834496,	15257	0	83.41	LPPEVANFMQLVELDVSR	3	2057.08	111.392	577	NA	NA	NA	0	0	0	0	1267	51.0278	111.392	30514	44.57	66.8219	0.0160244	24	3857
47	33	0.005520,0.157023,0.837457,	NA	NA	b2,b3,b3-H2O,y3,y3-NH3,b4,y4,y4-NH3,b5,b5-H2O,y5,y6,y7,b7,b7*,y8,b11,y12,b12,y13,b14,b15,b16,b16-H2O,b16-NH3,b17,b17*,b19,b4(2+),b6(2+),b10(2+),b15(2+),y16(2+),b16(2+),y17(2+),b17(2+),b18(2+),b19(2+),y19(2+),b20(2+),y20(2+),b21(2+),y21(2+),b22(2+),	281.089697,330.165956,312.155392,345.224471,328.197922,427.218716,458.308531,441.281982,514.250746,496.240182,557.376941,670.461001,741.498111,778.301867,680.306597,840.566521,1157.487427,1270.700101,1286.530017,1399.742691,1530.599547,1587.621007,1716.663597,1698.653033,1699.637048,1815.732007,1717.736737,1999.853177,507.185047,691.269837,1029.428847,1587.621007,1681.875491,1716.663597,1778.9282…	11150	0	59.23	SLEPSPSPGPQEEDGEVALVLLGR	3	2556.22	220.868	577	Phosphorylation(1)	NA	NA	1	0	0	0	1354	51.3162	220.868	22300	62.2711	158.597	8.16712951018899e-36	0	110
47	31	0.028754,0.153355,0.817891,	NA	NA	b3,y3,y4,b5,b5-H2O,y5,b6,b6-H2O,y6,y7,b7,b7-H2O,b7*,y8,y10,b12,b13,b13-H2O,b14,b16,b16-H2O,b17,b17*,b18,b19,b19-NH3,y5(2+),b6(2+),y14(2+),y16(2+),y17(2+),b17(2+),b18(2+),b19(2+),y19(2+),b20(2+),b21(2+),y21(2+),b22(2+),b23(2+),	330.165956,345.224471,458.308531,514.250746,496.240182,557.376941,611.303506,593.292942,670.461001,741.498111,778.301867,760.291303,680.306597,840.566521,1026.630571,1286.530017,1415.572607,1397.562043,1530.599547,1716.663597,1698.653033,1815.732007,1717.736737,1886.769117,1999.853177,1982.826628,557.376941,691.269837,1527.801271,1681.875491,1778.928251,1815.732007,1886.769117,1999.853177,2042.97…	11217	0	59.57	SLEPSPSPGPQEEDGEVALVLLGR	3	2556.23	195.304	577	Phosphorylation(1)	NA	NA	1	0	0	0	1405	51.4768	195.304	22434	78.9316	116.372	1.13867549932395e-25	0	244
16	13	NA	NA	NA	y1,b3,y2,y2-H2O,b4,b4-H2O,y3,y3-NH3,y4,y4-H2O,b6,b6-H2O,y5,b7,y6,b8,y7,y7-H2O,y7-NH3,y8,	175.118951,230.113526,290.145891,272.135326,343.197586,325.187022,347.167351,330.140802,446.235761,428.225196,570.324576,552.314012,574.294341,627.346036,687.378401,742.372976,788.426081,770.415516,771.399532,845.447541,	2307	0	25.91	AGTLQVGDR	2	916.486	103.787	577	NA	NA	NA	0	0	0	0	342	45.3403	103.787	4614	42.9947	60.7925	0.0178201	25	3881
16	13	NA	NA	NA	y1,b2,y2,y2-NH3,b3,b4,y3,y4,b6,y5,y5-H2O,y5-NH3,y6,b7,b7-H2O,y7,y7-NH3,y8,y8-H2O,y8-NH3,	175.118951,211.144096,288.203011,271.176462,326.171036,383.192496,416.261591,517.309271,631.308586,664.377681,646.367116,647.351132,721.399141,759.367166,741.356602,836.426081,819.399532,933.478841,915.468276,916.452292,	6338	0	40.59	LPDGFTQLR	2	1046.56	103.787	577	NA	NA	NA	0	0	0	0	447	46.5031	103.787	12676	37.4146	66.3726	0.0178201	25	3917
18	13	NA	NA	NA	b2,y2,y2-NH3,b3,b3-NH3,y3,y3-H2O,y3-NH3,y4,y5,y5-H2O,b6,y6,y6-H2O,b7,b7-H2O,b7-NH3,y7,y7-H2O,y7-NH3,b8,b8-H2O,b8-NH3,y9,y9-H2O,y9-NH3,b9,b9-H2O,	228.145496,260.196861,243.170312,329.193176,312.166627,389.239451,371.228886,372.212902,476.271481,573.324241,555.313676,660.357606,710.383151,692.372586,747.389636,729.379072,730.363087,807.435911,789.425346,790.409362,876.432226,858.421662,859.405677,979.520701,961.510136,962.494152,989.516286,971.505722,	706	0	19.13	RATPHPSELK	2	1135.62	92.7851	577	NA	NA	NA	0	1	0	0	509	47.0672	92.7851	1412	32.9711	59.814	0.0209585	27	3963
46	27	0.922938,0.032447,0.032447,0.006084,0.006084,	NA	NA	b3,y3,b3,b4,y4,b5,b5-H2O,b5,y5,y6,b7,y7,y7-NH3,y8,b10,y10,b11,y11,b15,b16,b17,y6(2+),y9(2+),b13(2+),y16(2+),b17(2+),y17(2+),b18(2+),b19(2+),y19(2+),y19(2+),b20(2+),y21(2+),b21(2+),y21(2+),b22(2+),y22(2+),	330.165956,345.224471,352.147899,427.218716,458.308531,514.250746,496.240182,536.232689,557.376941,670.461001,720.317479,741.498111,724.471562,840.566521,971.444459,1026.630571,1077.521096,1141.657511,1507.654676,1658.679209,1757.747619,670.461001,991.591054,1357.588219,1681.875491,1757.747619,1778.928251,1828.784729,1941.868789,1963.013041,1984.994984,2040.937199,2147.097831,2154.021259,2169.079…	10397	0	55.79	SLEPSPSPGPQEEDGEVALVLLGR	3	2498.24	152.171	577	Sodium adduct(1)	NA	NA	1	0	0	0	1565	51.9451	152.171	20794	71.0658	81.1052	2.19473581533837e-12	0	1046
61	25	NA	NA	NA	y2,b5,b6,y4,b7,y6,y7,y9,y9-NH3,y10,y10-H2O,y10-NH3,y11,y13,b16,y5(2+),y7(2+),y8(2+),b15(2+),y13(2+),b18(2+),b22(2+),y20(2+),y21(2+),y22(2+),b24(2+),y24(2+),y25(2+),	234.144831,396.224126,453.245586,494.297301,566.329646,650.387171,747.439931,1004.541101,987.514552,1103.609511,1085.598946,1086.582962,1160.630971,1404.752141,1405.706976,593.365711,747.439931,876.482521,1318.674946,1404.752141,1629.797916,2030.008956,2112.014451,2169.035911,2268.104321,2287.110126,2468.220411,2581.304471,	9022	0	50.25	AGGPLGLSIVGGSDHSSHPFGVQEPGVFISK	4	3033.54	96.3128	577	NA	NA	NA	0	0	0	0	1453	51.6227	96.3128	18044	32.0505	64.2622	0.0226512	27	3977
30	16	NA	NA	NA	b3,b3-H2O,b3-NH3,y3,b5,b5-H2O,b5-NH3,y6,y7,y8,y9,y10,b10,b10-NH3,y11,b12,b12-H2O,b12-NH3,y12,b13,b13-H2O,b13-NH3,y13,y14,y15,y15-H2O,y15-NH3,	313.150646,295.140082,296.124097,371.240121,471.219786,453.209222,454.193237,556.320151,613.341611,726.425671,823.478431,920.531191,932.483586,915.457037,1017.583951,1046.526506,1028.515942,1029.499957,1104.615981,1117.563616,1099.553052,1100.537067,1175.653091,1272.705851,1359.737881,1341.727316,1342.711332,	4261	0	33.17	QSPASPPPLGGGAPVR	2	1487.8	84.3682	577	NA	NA	NA	0	0	0	0	659	48.1889	84.3682	8522	30.5616	53.8066	0.0233174	27	3990
24	15	NA	NA	NA	b2,b3,y2,b4,y3,b5,y4,y5,b8,b9,y8,y8-H2O,y9,y10,y11,y11-NH3,b12,	185.128446,256.165556,303.177531,327.202666,402.245941,426.271076,489.277971,546.299431,681.392976,738.414436,801.421331,783.410766,900.489741,971.526851,1042.563961,1025.537412,1052.573456,	3986	0	32.25	ALAAVPSAGSVQR	2	1226.68	92.6765	577	NA	NA	NA	0	0	0	0	458	46.6087	92.6765	7972	37.6081	55.0684	0.0247276	27	4000
24	15	NA	NA	NA	y2,b2,b2-H2O,b2-NH3,y3,y4,b5,b5-H2O,b5-NH3,y6,y7,y8,y9,y10,b10,b10-NH3,y11,b11,b12,y12,y12-H2O,y12-NH3,	204.134261,230.113536,212.102972,213.086987,261.155721,332.192831,457.240516,439.229952,440.213967,532.308921,645.392981,702.414441,815.498501,872.519961,898.499236,881.472687,929.541421,955.520696,1012.542156,1030.589101,1012.578536,1013.562552,	5422	0	37.28	QTGGLGISIAGGK	2	1158.65	92.6765	577	NA	NA	NA	0	0	0	0	419	46.2221	92.6765	10844	37.4146	55.262	0.0247276	27	4002
24	15	NA	NA	NA	b2,b3,b4,b5,y5,y6,y6-NH3,y7,y7-H2O,y7-NH3,b7,b7-H2O,b8,b8-H2O,y8,y9,y9-H2O,b10,y10,y11,b12,	211.144096,324.228156,437.312216,534.364976,539.329991,626.362021,609.335472,755.404611,737.394046,738.378062,760.460326,742.449762,847.492356,829.481792,852.457371,949.510131,931.499566,1001.566576,1062.594191,1175.678251,1211.703396,	8429	0	48.06	LPLLPPESPGPLR	2	1385.82	92.6765	577	NA	NA	NA	0	0	0	0	353	45.4777	92.6765	16858	29.3102	63.3663	0.0247276	27	4005
24	15	NA	NA	NA	b2,y2,b3,b4,b5,y5,y6,y7,y7-NH3,b7,b7-H2O,b8,b8-H2O,y8,y9,y9-H2O,y10,y10-NH3,y11,b12,	211.144096,288.203011,324.228156,437.312216,534.364976,539.329991,626.362021,755.404611,738.378062,760.460326,742.449762,847.492356,829.481792,852.457371,949.510131,931.499566,1062.594191,1045.567642,1175.678251,1211.703396,	8815	0	49.47	LPLLPPESPGPLR	2	1385.82	92.6765	577	NA	NA	NA	0	0	0	0	346	45.3908	92.6765	17630	29.3102	63.3663	0.0247276	27	4006
46	22	0.959671,0.033738,0.006326,0.000222,0.000042,	NA	NA	y4,y5,b6,y6,b7,y7,y8,y8-NH3,b9,b9-H2O,b10,y10,b11,y11,y11-H2O,b12,y12,b13,y13,b14,b14-NH3,b15,b15-NH3,y15,b16,b17,y17,y17,b18,b19,	458.308531,557.376941,611.303506,670.461001,720.317479,741.498111,840.566521,823.539972,874.391699,856.381135,971.444459,1026.630571,1077.521096,1141.657511,1123.646946,1228.545629,1270.700101,1357.588219,1399.742691,1472.615159,1455.588610,1529.636619,1512.610070,1624.854031,1658.679209,1757.747619,1778.928251,1800.910194,1828.784729,1941.868789,	10401	0	55.8	SLEPSPSPGPQEEDGEVALVLLGR	2	2498.24	101.482	577	Sodium adduct(1)	NA	NA	1	0	0	0	1597	52.033	101.482	20802	28.3276	73.1539	7.96048652962605e-09	0	1622
47	24	0.000230,0.006547,0.993223,	0.990790,0.006531,0.001225,0.001225,0.000230,	NA	b3,y3,y3-NH3,b3,y4,b5,b5-H2O,b5,y5,y6,y7,y8,y10,y12,y13,b14,y17,b6(2+),y9(2+),y10(2+),b14(2+),y15(2+),y16(2+),y17(2+),y17(2+),b17(2+),b18(2+),y18(2+),b19(2+),y19(2+),y19(2+),b20(2+),y21(2+),y21(2+),	330.165956,345.224471,328.197922,352.147899,458.308531,514.250746,496.240182,536.232689,557.376941,670.461001,741.498111,840.566521,1026.630571,1270.700101,1399.742691,1552.581490,1778.928251,691.269837,991.591054,1026.630571,1552.581490,1624.854031,1681.875491,1778.928251,1800.910194,1837.713950,1908.751060,1967.908555,2021.835120,2042.979372,2064.961315,2120.903530,2227.064162,2249.046105,	11174	0	59.35	SLEPSPSPGPQEEDGEVALVLLGR	3	2578.2	117.986	577	Phosphorylation(1)	Sodium adduct(1)	NA	2	0	0	0	1216	50.8493	117.986	22348	54.5835	63.4021	7.96294022306428e-07	2	2092
46	19	0.006506,0.006506,0.986988,	NA	NA	y4,y4-NH3,y5,b6,b6-H2O,y6,y7,y8,y10,y11,b11,y13,b13,b13*,b14,b14*,y15,y15-H2O,y16,b16,b16-NH3,y17,y17-NH3,b17,b17*,b18,b18-NH3,y18,y18-NH3,y18*,	458.308531,441.281982,557.376941,611.303506,593.292942,670.461001,741.498111,840.566521,1026.630571,1141.657511,1157.487427,1399.742691,1415.572607,1317.577337,1530.599547,1432.604277,1624.854031,1606.843466,1681.875491,1716.663597,1699.637048,1778.928251,1761.901702,1815.732007,1717.736737,1886.769117,1869.742568,1945.926612,1928.900063,1847.931342,	11166	0	59.31	SLEPSPSPGPQEEDGEVALVLLGR	2	2556.23	75.4745	577	Phosphorylation(1)	NA	NA	1	0	0	0	1401	51.4644	75.4745	22332	28.3276	47.1468	0.000888291	10	3253
80	28	NA	NA	NA	y5,y5-NH3,b6,b6-H2O,y6,y7,b8,b8-H2O,y8,b9,b9-H2O,y9,b10,b10-H2O,b12,y12,b13,b14,y15,y7(2+),b9(2+),y12(2+),y14(2+),y15(2+),y16(2+),y17(2+),y18(2+),y19(2+),y21(2+),b23(2+),b25(2+),y28(2+),b35(2+),	539.304841,522.278292,573.287856,555.277292,610.341951,681.379061,773.403946,755.393382,828.447471,886.488006,868.477442,925.500231,985.556416,967.545852,1203.592546,1223.664331,1260.614006,1407.682416,1476.806961,681.379061,886.488006,1223.664331,1379.754201,1476.806961,1563.838991,1662.907401,1791.949991,1905.034051,2047.108271,2295.069636,2481.170076,2754.384491,3418.672196,	14777	0	79.27	SVGDTLTVLVCDGFEASTDAALEVSPGVIANPFAAGIGHR	5	3956.98	88.2029	577	NA	NA	NA	0	0	0	0	1141	50.5729	88.2029	29554	44.5709	43.6319	0.0254685	27	4014
36	20	NA	NA	NA	y2,y4,y5,y6,b7,y7,b8,b8-H2O,y8,b9,y9,y9-H2O,b10,b10-NH3,b11,b12,b13,b10(2+),b11(2+),b13(2+),b14(2+),b16(2+),b17(2+),	262.150981,476.246331,589.330391,718.372981,721.387896,817.441391,868.456306,850.445742,930.525451,999.496796,1058.584031,1040.573466,1127.555376,1110.528827,1240.639436,1339.707846,1468.750436,1127.555376,1240.639436,1468.750436,1581.834496,1795.929846,1882.961876,	14856	0	79.87	LPPEVANFMQLVELDVSR	3	2057.08	108.303	577	NA	NA	NA	0	0	0	0	1143	50.5805	108.303	29712	53.8781	54.4248	0.0263959	27	4020
82	34	0.876712,0.030822,0.030822,0.030822,0.030822,0.000000,0.000000,	NA	NA	b3,b4,y4,b5,b5-H2O,y5,y6,y6-H2O,b7,b7,y7,y7-NH3,y8,b10,b10,b10,y10,b11,y11,y12,y13,b15,y17,b16,b16-NH3,b17,b18,b19,b10(2+),y11(2+),y12(2+),b13(2+),y15(2+),y17(2+),y18(2+),b18(2+),y19(2+),b19(2+),y20(2+),y21(2+),b21(2+),b24(2+),y34(2+),y35(2+),	352.147899,427.218716,452.192201,514.250746,496.240182,565.276261,636.313371,618.302806,698.335536,720.317479,735.381781,718.355232,850.408721,949.462516,949.462516,971.444459,1076.504071,1077.521096,1133.525531,1232.593941,1303.631051,1529.636619,1641.790061,1658.679209,1641.652660,1757.747619,1828.784729,1941.868789,971.444459,1133.525531,1232.593941,1357.588219,1457.705271,1641.790061,1797.891…	10516	0	56.28	SLEPSPSPGPQEEDGEVALVLLGRPSPGAVGPEDVALCSSR	4	4121	130.123	577	Sodium adduct(1)	NA	NA	1	1	0	0	1117	50.4805	130.123	21032	38.6158	91.5068	2.86763199924777e-10	0	1326
79	28	0.006084,0.006084,0.032447,0.922938,0.032447,	NA	NA	y3,b4,b5,b5-H2O,y4,y5,b6,y6,y7,y9,y10,b11,y11,b12,y12,y14,y15,y16,b17,b18,b6(2+),y14(2+),y15(2+),y16(2+),y17(2+),y18(2+),y19(2+),y24(2+),b24(2+),y25(2+),b25(2+),y28(2+),y32(2+),y32(2+),	369.199321,381.138059,482.185739,464.175175,482.283381,539.304841,595.269799,610.341951,681.379061,925.500231,1039.543161,1110.547549,1110.580271,1203.592546,1223.664331,1379.754201,1476.806961,1563.838991,1716.776089,1817.823769,595.269799,1379.754201,1476.806961,1563.838991,1662.907401,1791.949991,1905.034051,2372.196864,2416.119989,2443.233974,2503.152019,2776.366434,3184.573091,3206.555034,	14763	0	79.18	SVGDTLTVLVCDGFEASTDAALEVSPGVIANPFAAGIGHR	4	3978.96	89.6364	577	Sodium adduct(1)	NA	NA	1	0	0	0	1246	50.9552	89.6364	29526	42.0717	47.5647	7.18742323063145e-05	5	2790
80	28	0.132942,0.709025,0.132942,0.024927,0.000164,	NA	NA	b4,b4-H2O,y3,b5,b5-H2O,b6,b6,y6,b7,b7-H2O,b8,b8-H2O,y9,y10,b11,y11,y12,y15,b15,b16,y18,b20,y7(2+),b8(2+),y16(2+),y17(2+),y18(2+),y19(2+),b21(2+),y22(2+),b22(2+),y24(2+),b24(2+),y25(2+),b25(2+),y28(2+),y31(2+),	359.156116,341.145552,369.199321,460.203796,442.193232,573.287856,595.269799,610.341951,674.335536,656.324972,773.403946,755.393382,925.500231,1039.543161,1110.547549,1110.580271,1223.664331,1476.806961,1558.706949,1607.762116,1791.949991,1981.905876,681.379061,773.403946,1563.838991,1662.907401,1791.949991,1905.034051,2074.924929,2162.135211,2188.008989,2350.214921,2416.119989,2443.233974,2503.1…	14816	0	79.54	SVGDTLTVLVCDGFEASTDAALEVSPGVIANPFAAGIGHR	4	3978.96	88.2029	577	Sodium adduct(1)	NA	NA	1	0	0	0	1210	50.8279	88.2029	29632	40.3722	47.8307	0.000104072	6	2854
78	25	0.000894,0.723156,0.135592,0.135592,0.004767,	NA	NA	y5,y6,y7,b9,y9,y9-NH3,b10,b10,y10,b11,y11,y12,b12,y14,y15,y16,y16-NH3,y17,b17,b18,y19,y19-H2O,y20,b17(2+),y18(2+),b26(2+),y28(2+),b28(2+),y30(2+),y31(2+),y32(2+),y34(2+),b38(2+),	539.304841,610.341951,681.379061,908.469949,925.500231,908.473682,985.556416,1007.538359,1039.543161,1110.547549,1110.580271,1223.664331,1225.574489,1379.754201,1476.806961,1563.838991,1546.812442,1662.907401,1694.794146,1817.823769,1905.034051,1887.023486,1976.071161,1716.776089,1813.931934,2600.204779,2754.384491,2756.294649,2994.402564,3093.470974,3206.555034,3406.671124,3667.781119,	14771	0	79.23	SVGDTLTVLVCDGFEASTDAALEVSPGVIANPFAAGIGHR	3	3978.96	70.8311	577	Sodium adduct(1)	NA	NA	1	0	0	0	1265	51.0209	70.8311	29542	33.6299	37.2012	0.0034819	13	3566
79	25	0.024324,0.129730,0.691892,0.129730,0.024324,	NA	NA	b4,b5,y4,y5,b8,b9,y9,y9-NH3,y10,b11,y11,y11-NH3,y12,b12,y14,y14,y15,y15-NH3,y16,y17,b17,y19,b19,b19-H2O,b8(2+),y12(2+),b12(2+),y16(2+),b18(2+),b21(2+),y23(2+),b23(2+),y26(2+),y28(2+),y28(2+),y36(2+),	381.138059,482.185739,482.283381,539.304841,795.385889,908.469949,925.500231,908.473682,1039.543161,1110.547549,1110.580271,1093.553722,1223.664331,1225.574489,1379.754201,1379.754201,1476.806961,1459.780412,1563.838991,1662.907401,1694.794146,1905.034051,1932.850709,1914.840145,773.403946,1223.664331,1225.574489,1563.838991,1795.841826,2052.942986,2263.182891,2317.051579,2572.276564,2754.384491,…	14820	0	79.57	SVGDTLTVLVCDGFEASTDAALEVSPGVIANPFAAGIGHR	3	3978.95	69.6131	577	Sodium adduct(1)	NA	NA	1	0	0	0	1206	50.8135	69.6131	29640	37.7737	31.8394	0.00416135	15	3596
24	15	1.000000,0.000000,	NA	NA	b2,y2,y2-NH3,b3,y3,y3-NH3,y4,b5,b5-NH3,y5,b7,y6,y7,y8,y9,y9-H2O,y9-NH3,y10,b11,y11,y11-H2O,y11-NH3,y12,y12-NH3,	213.159746,246.156061,229.129512,328.186691,375.198651,358.172102,476.246331,555.313681,538.287132,575.314741,683.408636,690.341681,789.410091,846.431551,960.474481,942.463916,943.447932,1073.558541,1155.589171,1188.585486,1170.574921,1171.558937,1301.669546,1284.642997,	6697	0	41.87	VLSINGVDVTEAR	2	1400.74	92.6765	577	Formylation(1)	NA	NA	1	0	0	0	737	48.6747	92.6765	13394	38.3221	54.3544	0.00191356	11	3415
41	21	NA	NA	NA	y1,b2,y2,y3,y4,y4-NH3,y5,y6,y8,y8-H2O,y9,y9-H2O,y9-NH3,y10,b12,b7(2+),b8(2+),b9(2+),y9(2+),b10(2+),b12(2+),b15(2+),b16(2+),b17(2+),b18(2+),	175.118951,253.093126,304.161541,417.245601,530.329661,513.303112,643.413721,714.450831,928.582571,910.572006,1025.635331,1007.624766,1008.608782,1112.667361,1203.611636,760.373646,873.457706,974.505386,1025.635331,1045.542496,1203.611636,1514.796136,1585.833246,1698.917306,1812.001366,	11717	0	61.95	HDHAVSLLTAASPTIALLLER	4	2228.24	104.394	577	NA	NA	NA	0	0	0	0	744	48.7157	104.394	23434	51.531	52.8633	0.0292869	27	4043
20	14	NA	NA	NA	b2,b2-H2O,b2-NH3,b3,b3-H2O,b3-NH3,b4,y4,b5,b5-H2O,b5-NH3,y5,b6,b6-H2O,b6-NH3,y6,b7,y7,b8,b8-H2O,b8-NH3,y8,y8-H2O,y9,b10,	230.077146,212.066582,213.050597,343.161206,325.150642,326.134657,440.213966,476.271481,569.256556,551.245992,552.230007,573.324241,682.340616,664.330052,665.314067,686.408301,779.393376,815.450891,908.435966,890.425402,891.409417,912.503651,894.493086,1025.587711,1108.552056,	6451	0	40.99	NDIPEIPESIK	2	1254.66	96.6662	577	NA	NA	NA	0	0	0	0	636	48.0346	96.6662	12902	29.3102	67.3559	0.0292898	27	4064
20	14	NA	NA	NA	b2,b3,y3,y3-NH3,b4,b5,y4,b6,b6-H2O,y5,b7,b7-H2O,y6,y6-NH3,y7,y8,y9,y9-H2O,b10,b10-H2O,	201.123366,298.176126,359.265271,342.238722,369.213236,456.245266,506.333681,569.329326,551.318762,593.365711,656.361356,638.350792,706.449771,689.423222,793.481801,864.518911,961.571671,943.561106,1015.582236,997.571672,	10097	0	54.57	SLPASLSFLVK	2	1161.69	96.6662	577	NA	NA	NA	0	0	0	0	333	45.2244	96.6662	20194	37.4146	59.2516	0.0292898	27	4076
62	25	NA	NA	NA	b2,b3,y2,y3,y3-H2O,y4,y4-NH3,b6,y5,y6,b8,y7,b9,y8,b10,b12,b12-NH3,y6(2+),y7(2+),b9(2+),y8(2+),b10(2+),b13(2+),b14(2+),b15(2+),y16(2+),b18(2+),b23(2+),	201.123366,272.160476,288.203011,417.245601,399.235036,530.329661,513.303112,593.340556,631.377341,730.445751,820.467546,843.529811,935.494486,957.572741,1034.562896,1234.678986,1217.652437,730.445751,843.529811,935.494486,957.572741,1034.562896,1362.737566,1433.774676,1546.858736,1680.927871,1815.959896,2270.213866,	14031	0	74.26	SLAHLALNDVSLQALPGDVGNLANLVTLELR	5	3226.78	94.5069	577	NA	NA	NA	0	0	0	0	592	47.7232	94.5069	28062	29.1146	65.3924	0.0298748	27	4089
54	22	NA	NA	NA	b4,y4,y5,y6,y7,b10,b10-H2O,b10-NH3,b11,b11-NH3,y10,b12,b12-NH3,b13,y12,y11(2+),y15(2+),y16(2+),y17(2+),y18(2+),y19(2+),y20(2+),y21(2+),y23(2+),y24(2+),y26(2+),	391.197586,502.334751,615.418811,716.466491,829.550551,1046.490136,1028.479572,1029.463587,1159.574196,1142.547647,1216.678321,1272.658256,1255.631707,1401.700846,1458.804971,1345.720911,1782.995951,1912.038541,2025.122601,2138.206661,2251.290721,2365.333651,2479.376581,2678.472271,2793.499211,3027.599651,	14630	0	78.16	GVSFDQANNLLIEPARIEEEELTLTILR	3	3183.69	84.9992	577	NA	NA	NA	0	1	0	0	987	49.9432	84.9992	29260	41.3172	43.6821	0.0305267	27	4092
54	22	NA	NA	NA	y3,y4,b5,y5,y6,y7,y8,b12,y11,b13,b13-NH3,y12,b10(2+),y13(2+),y14(2+),y15(2+),y16(2+),y17(2+),y18(2+),y20(2+),y21(2+),y22(2+),b26(2+),	401.287071,502.334751,506.224526,615.418811,716.466491,829.550551,958.593141,1272.658256,1345.720911,1401.700846,1384.674297,1458.804971,1046.490136,1614.906081,1685.943191,1782.995951,1912.038541,2025.122601,2138.206661,2365.333651,2479.376581,2550.413691,2896.493786,	15995	0	91.34	GVSFDQANNLLIEPARIEEEELTLTILR	3	3183.69	84.9992	577	NA	NA	NA	0	1	0	0	990	49.9564	84.9992	31990	29.98	55.0193	0.0305267	27	4093
75	27	NA	NA	NA	b4,y5,y6,y6-NH3,b7,b7-H2O,y7,b8,b9,y9,y9-NH3,b10,y10,b11,b12,b14,b15,y15,y16,y19,y15(2+),y18(2+),y19(2+),y20(2+),y21(2+),y22(2+),y23(2+),y28(2+),y31(2+),y35(2+),	436.255436,626.340891,697.378001,680.351452,735.403546,717.392982,834.436911,834.471956,905.509066,988.511131,971.484582,1018.593126,1102.554061,1131.677186,1259.735766,1447.797716,1575.856296,1636.787961,1707.825071,1960.967701,1636.787961,1903.946241,1960.967701,2090.010291,2147.031751,2262.058691,2359.111451,2916.374621,3199.564201,3595.765071,	11473	0	60.81	LPQPEAVVALLQGMQPDGEGPVAPGGWHNGPHAPWAPR	3	3933.97	88.4212	577	NA	NA	NA	0	0	0	0	1273	51.0483	88.4212	22946	31.9048	56.5164	0.0310367	27	4095
40	21	NA	NA	NA	y2,y3,y3-H2O,y4,y5,y5-H2O,y5-NH3,y6,y7,y9,b10,y10,b11,b12,y5(2+),y6(2+),b7(2+),y7(2+),b8(2+),y9(2+),b10(2+),b11(2+),b12(2+),b15(2+),	262.150981,361.219391,343.208826,476.246331,589.330391,571.319826,572.303842,718.372981,817.441391,1058.584031,1127.555376,1189.624521,1240.639436,1339.707846,589.330391,718.372981,721.387896,817.441391,868.456306,1058.584031,1127.555376,1240.639436,1339.707846,1696.861436,	15030	0	81.3	LPPEVANFMQLVELDVSR	3	2057.08	107.078	577	NA	NA	NA	0	0	0	0	1167	50.6707	107.078	30060	41.8239	65.2543	0.0319304	27	4098
57	24	NA	NA	NA	y3,y4,y5,y5-H2O,b6,b6-H2O,b8,y9,y9-NH3,b10,y10,y11,y11-H2O,y11-NH3,y12,y12-NH3,b14,y13,y15,b18,b19,b20,y9(2+),b14(2+),y18(2+),y19(2+),y21(2+),b22(2+),b23(2+),y23(2+),	329.193171,416.225201,517.272881,499.262316,569.292936,551.282372,737.382806,930.463931,913.437382,935.483246,987.485391,1100.569451,1082.558886,1083.542902,1215.596391,1198.569842,1317.668476,1344.638981,1540.760151,1757.859176,1870.943236,1927.964696,930.463931,1317.668476,1825.892621,1922.945381,2121.045821,2153.076036,2254.123716,2289.135691,	5870	0	38.91	LAEAPSPAPTPSPTPVEDLGPQTSTSPGR	3	2857.42	95.656	577	NA	NA	NA	0	0	0	0	1623	52.1032	95.656	11740	29.1146	66.5414	0.033029	27	4102
32	16	NA	NA	NA	b3,b3-H2O,y4,y5,b4,b4-H2O,y6,b6,b6-H2O,b6-NH3,y8,y8-NH3,b8,y9,b9,y10,y11,y11-NH3,b11,b11-NH3,y13,b12,b12-H2O,b13,b13-H2O,b13-NH3,	372.176516,354.165952,386.214631,499.298691,501.219106,483.208542,600.346371,686.299146,668.288582,669.272597,883.478441,866.451892,912.394496,954.515551,983.431606,1083.558141,1180.610901,1163.584352,1266.563676,1249.537127,1365.690941,1367.611356,1349.600792,1480.695416,1462.684852,1463.668867,	7525	0	44.85	EIEEGQPEAPWTLPGGR	2	1865.9	79.0587	577	NA	NA	NA	0	0	0	0	1171	50.6856	79.0587	15050	39.3241	39.7346	0.0333089	27	4106
16	12	1.000000,	NA	NA	y1,b2,y2,y3,y4,b5,y5,b6,y6,y6-H2O,b7,y7,y7-H2O,y7-NH3,y8,y8-H2O,y8-NH3,	147.112801,197.128446,244.165561,341.218321,398.239781,547.248669,549.264314,604.270129,620.301424,602.290859,701.322889,748.360004,730.349439,731.333455,845.412764,827.402199,828.386215,	1091	0	21.08	VPQAEGPPK	2	944.481	89.0801	577	Sodium adduct(1)	NA	NA	1	0	0	0	347	45.4033	89.0801	2182	32.6662	56.414	0.0267921	27	4027
14	12	NA	NA	NA	y1,y1-NH3,b2,y2,b3,y3,b4,y4,y4-NH3,b5,b5-NH3,y5,y5-NH3,b6,b6-H2O,b6-NH3,y6,y6-H2O,y6-NH3,b7,	175.118951,158.092402,201.123366,288.203011,330.165956,359.240121,458.224536,474.267061,457.240512,573.251476,556.224927,602.325641,585.299092,644.288586,626.278022,627.262037,731.368231,713.357666,714.341682,757.372646,	3473	0	30.41	SLEQDALR	2	931.483	101.251	577	NA	NA	NA	0	0	0	0	339	45.302	101.251	6946	54.668	46.5826	0.0383853	30	4143
76	27	NA	NA	NA	y5,b6,y6,y6,b7,y7,y7-NH3,b8,b8-NH3,b9,b10,b11,y11,y11-NH3,b12,b13,b13-H2O,y12,y12-NH3,b14,y13,b15,b9(2+),b10(2+),b11(2+),b14(2+),b15(2+),y15(2+),y16(2+),y19(2+),b20(2+),y22(2+),	626.340891,636.335136,697.378001,697.378001,735.403546,834.436911,817.410362,834.471956,817.445407,905.509066,1018.593126,1131.677186,1239.612971,1222.586422,1259.735766,1316.757226,1298.746662,1425.692281,1408.665732,1447.797716,1482.713741,1575.856296,905.509066,1018.593126,1131.677186,1447.797716,1575.856296,1636.787961,1707.825071,1960.967701,2031.021506,2262.058691,	11476	0	60.81	LPQPEAVVALLQGMQPDGEGPVAPGGWHNGPHAPWAPR	6	3933.97	86.9518	577	NA	NA	NA	0	0	0	0	1285	51.089	86.9518	22952	26.2097	60.7422	0.0385814	30	4188
20	13	1.000000,	NA	NA	b2,b2-NH3,b3,b3*,y3,y3-NH3,y4,y5,b5,b5*,y6,y7,y7-H2O,b7,b8,b8*,y8,y8-H2O,y9,y9-H2O,y9-NH3,y9*,b10,b10*,	228.134266,211.107717,395.132627,297.137357,401.214301,384.187752,472.251411,569.304171,621.227977,523.232707,666.356931,795.399521,777.388956,815.333497,886.370607,788.375337,892.452281,874.441716,1059.450642,1041.440077,1042.424093,961.455372,1112.465957,1014.470687,	1900	0	24.35	VQSPEPPAPER	2	1286.58	84.0636	577	Phosphorylation(1)	NA	NA	1	0	0	0	396	45.977	84.0636	3800	28.3149	55.7487	0.0721953	42	4367
37	20	NA	NA	NA	y2,y3,y3-H2O,y4,y5,b6,b6-H2O,y6,y6-NH3,b7,y7,b8,y8,b10,y10,b11,b11-H2O,b12,b7(2+),b9(2+),b11(2+),b12(2+),b14(2+),b16(2+),	262.150981,361.219391,343.208826,476.246331,589.330391,607.344966,589.334402,718.372981,701.346432,721.387896,817.441391,868.456306,930.525451,1127.555376,1189.624521,1240.639436,1222.628872,1339.707846,721.387896,999.496796,1240.639436,1339.707846,1581.834496,1795.929846,	14464	0	76.89	LPPEVANFMQLVELDVSR	3	2057.08	105.358	577	NA	NA	NA	0	0	0	0	1267	51.0278	105.358	28928	42.0747	63.2835	0.0413998	31	4197
34	16	NA	NA	NA	y3,y4,y4-NH3,b5,y5,y5-H2O,y6,y6-H2O,y7,y7-H2O,y7-NH3,b8,y9,y9-NH3,y10,y11,y12,y12-NH3,y13,b14,b15,b16,b16-NH3,y16,	361.219391,476.246331,459.219782,536.307856,589.330391,571.319826,718.372981,700.362416,817.441391,799.430826,800.414842,868.456306,1058.584031,1041.557482,1189.624521,1336.692931,1450.735861,1433.709312,1521.772971,1581.834496,1696.861436,1795.929846,1778.903297,1846.936731,	14354	0	76.29	LPPEVANFMQLVELDVSR	2	2057.08	74.2687	577	NA	NA	NA	0	0	0	0	1081	50.3383	74.2687	28708	28.6466	45.6222	0.0416228	31	4201
20	13	1.000000,	NA	NA	b2,b2-NH3,b3,b3*,y3,y3-H2O,y3-NH3,y4,y5,b5,b5*,y6,y6-H2O,b6,y7,y7-H2O,b8,b8*,y8,y8-H2O,y8-NH3,y9,y9-H2O,y9-NH3,y9*,b10,b10*,	228.134266,211.107717,395.132627,297.137357,401.214301,383.203736,384.187752,472.251411,569.304171,621.227977,523.232707,666.356931,648.346366,718.280737,795.399521,777.388956,886.370607,788.375337,892.452281,874.441716,875.425732,1059.450642,1041.440077,1042.424093,961.455372,1112.465957,1014.470687,	2014	0	24.79	VQSPEPPAPER	2	1286.58	84.0636	577	Phosphorylation(1)	NA	NA	1	0	0	0	388	45.8883	84.0636	4028	29.3102	54.7533	0.0721953	42	4368
44	32	0.769490,0.027052,0.144279,0.027052,0.027052,0.005072,0.000001,	NA	NA	y2,y2-NH3,b3,b3-H2O,y3,b4,y4,y5,b5,y6,b6,y7,y7,y9,b9,y10,b10,y11,b11,y12,b12,y13,b13,y14,y14-H2O,y14,y14-NH3,b14,y15,y15-NH3,b15,y17,y13(2+),y14(2+),y14(2+),y15(2+),y15(2+),y16(2+),y17(2+),y18(2+),y19(2+),y20(2+),y21(2+),y22(2+),	276.155391,259.128842,286.176126,268.165562,347.192501,399.260186,418.229611,489.266721,527.318766,618.309311,674.387176,747.351901,769.333844,933.415951,1009.532879,1084.440484,1084.603696,1177.485481,1219.669699,1234.506941,1276.691159,1347.591001,1391.718099,1444.643761,1426.633196,1466.625704,1449.599155,1520.760689,1537.662814,1520.636265,1635.787629,1779.789464,1347.591001,1444.643761,1466.…	11591	0	61.39	VSVIQFLEAPIGDEDAEEAAAEK	3	2453.17	222.072	577	Sodium adduct(1)	NA	NA	1	0	0	0	1428	51.5473	222.072	23182	56.2022	165.87	5.22616919866088e-36	0	106
55	22	NA	NA	NA	y4,y5,b6,b6-H2O,y6,y7,y9,b11,y10,b12,b12-NH3,b13,b13-NH3,y12,y15,y15(2+),y16(2+),y17(2+),b20(2+),y19(2+),y20(2+),y21(2+),y22(2+),y23(2+),b27(2+),	502.334751,615.418811,634.283106,616.272542,716.466491,829.550551,1087.635731,1159.574196,1216.678321,1272.658256,1255.631707,1401.700846,1384.674297,1458.804971,1782.995951,1782.995951,1912.038541,2025.122601,2226.103656,2251.290721,2365.333651,2479.376581,2550.413691,2678.472271,3009.577846,	15532	0	86.04	GVSFDQANNLLIEPARIEEEELTLTILR	3	3183.69	83.214	577	NA	NA	NA	0	1	0	0	996	49.9826	83.214	31064	30.8749	52.3392	0.0424709	31	4207
29	18	NA	NA	NA	y1,b2,b2-NH3,y2,b3,y4,b5,b5-H2O,y5,b6,b6-H2O,b6-NH3,y6,b7,y7,y7-NH3,y8,y8-H2O,b9,y5(2+),b7(2+),y8(2+),b10(2+),y12(2+),	175.118951,243.108786,226.082237,288.203011,356.192846,459.267401,514.261986,496.251422,572.351461,627.346046,609.335482,610.319497,701.394051,724.398806,798.446811,781.420262,895.499571,877.489006,950.494156,572.351461,724.398806,895.499571,1063.578216,1279.736831,	8638	0	48.81	NQLSALPPELGNLR	3	1521.84	109.357	577	NA	NA	NA	0	0	0	0	753	48.7679	109.357	17276	46.8354	62.5214	0.0451586	31	4215
16	12	NA	NA	NA	b1,y1,y1-NH3,b2,b2-NH3,b3,b4,b4-H2O,b5,y5,y5-NH3,y6,b7,b7-NH3,y7,y7-NH3,b8,b8-NH3,y8,y8-H2O,y8-NH3,	157.108386,175.118951,158.092402,272.135326,255.108777,369.188086,440.225196,422.214632,537.277956,539.329991,522.303442,610.367101,691.352176,674.325627,707.419861,690.393312,804.436236,787.409687,822.446801,804.436236,805.420252,	2031	0	24.85	RDPAPPGLR	2	978.548	89.0801	577	NA	NA	NA	0	1	0	0	301	44.7857	89.0801	4062	37.4146	51.6656	0.0488676	35	4240
16	12	NA	NA	NA	y1,b2,b2-NH3,y2,y2-NH3,y3,y3-H2O,y3-NH3,b3,b3-NH3,y4,y4-NH3,y5,y6,y6-NH3,b6,b6-NH3,b7,b7-H2O,b7-NH3,y7,y7-NH3,b8,b8-H2O,b8-NH3,	175.118951,257.160816,240.134267,274.187361,257.160812,403.229951,385.219386,386.203402,420.224146,403.197597,516.314011,499.287462,645.356601,792.425011,775.398462,809.419206,792.392657,938.461796,920.451232,921.435247,955.488341,938.461792,1037.530206,1019.519642,1020.503657,	5551	0	37.77	QKYFELEVR	2	1211.64	89.0801	577	NA	NA	NA	0	1	0	0	571	47.5664	89.0801	11102	42.9947	46.0855	0.0488676	35	4245
38	20	NA	NA	NA	y2,y2-NH3,b2,b2-H2O,y3,y4,b4,y5,y6,y6-NH3,b7,y9,y10,b9,b9-H2O,b10,b10-H2O,y11,b12,b4(2+),y9(2+),y11(2+),b14(2+),y15(2+),y17(2+),	232.140411,215.113862,243.133926,225.123362,303.177521,374.214631,397.208146,503.257221,604.304901,587.278352,739.398466,901.437361,958.458821,1062.536686,1044.526122,1119.558146,1101.547582,1144.538131,1345.653496,397.208146,901.437361,1144.538131,1517.738286,1623.787361,1777.861581,	6551	0	41.35	ELPGQTLHWGPEATEAAGR	3	2019.99	102.546	577	NA	NA	NA	0	0	0	0	1295	51.1227	102.546	13102	40.5023	62.0434	0.0530358	35	4257
46	32	0.983389,0.001215,0.001215,0.006482,0.006482,0.001215,0.000000,	NA	NA	y2,y2-H2O,b3,b3-H2O,y3,b4,y4,y4-H2O,y5,y5-H2O,b5,b5-H2O,b5-NH3,y6,b6,b6-H2O,y7,y7,b7,b7-H2O,b7-NH3,y9,b8,y9,y9-NH3,b9,b9,y10,y10,b10,y11,y11-NH3,b11,y12,y14,y14,y14,b11(2+),y13(2+),y13(2+),b13(2+),y14(2+),y14(2+),y15(2+),y15(2+),y16(2+),y17(2+),b17(2+),y18(2+),y19(2+),y20(2+),y21(2+),y22(2+),	276.155391,258.144826,286.176126,268.165562,347.192501,399.260186,418.229611,400.219046,489.266721,471.256156,527.318766,509.308202,510.292217,618.309311,674.387176,656.376612,747.351901,769.333844,787.471236,769.460672,770.444687,933.415951,938.495769,955.397894,938.371345,987.550936,1009.532879,1062.458541,1084.440484,1084.603696,1177.485481,1160.458932,1219.669699,1234.506941,1444.643761,1444.…	11667	0	61.73	VSVIQFLEAPIGDEDAEEAAAEK	3	2453.17	212.397	577	Sodium adduct(1)	NA	NA	1	0	0	0	1424	51.5351	212.397	23334	57.8879	154.51	5.91304398782031e-32	0	146
44	25	0.000224,0.964447,0.033906,0.001192,0.000224,0.000008,0.000000,	NA	NA	y3,y4,y5,y6,y6-H2O,b6,y7,y8,y8,b8,y9,y9-NH3,b8,b9,y10,y10-H2O,y10-NH3,y10,b10,y11,b11,y12,y13,b13,b13,y14,y14,y14-H2O,y14-NH3,y15,b14,y15,y15-H2O,y15-NH3,b15,y16,y16-H2O,y16-NH3,b16,y17,y17-H2O,y17-NH3,b17,y18,y18-H2O,y18-NH3,b18,	347.192501,418.229611,489.266721,618.309311,600.298746,674.387176,747.351901,818.389011,840.370954,916.513826,933.415951,916.389402,938.495769,1009.532879,1062.458541,1044.447976,1045.431992,1084.440484,1084.603696,1177.485481,1197.687756,1256.488884,1369.572944,1369.736156,1391.718099,1444.643761,1466.625704,1448.615139,1449.599155,1515.680871,1520.760689,1537.662814,1519.652249,1520.636265,1635…	11596	0	61.4	VSVIQFLEAPIGDEDAEEAAAEK	2	2453.17	136.84	577	Sodium adduct(1)	NA	NA	1	0	0	0	1458	51.6376	136.84	23192	43.1683	93.6721	2.4207650815055e-19	0	473
20	13	NA	NA	NA	y1,y2,y2-NH3,y3,y3-H2O,b5,b6,y6,b7,b7-NH3,y7,b8,b8-H2O,b8-NH3,b9,b9-H2O,b9-NH3,y9,y9-NH3,b10,b10-H2O,y10,y10-H2O,y10-NH3,	175.118951,288.203011,271.176462,403.229951,385.219386,555.361296,612.382756,646.315461,683.419866,666.393317,745.383871,798.446806,780.436242,781.420257,913.473746,895.463182,896.447197,945.499961,928.473412,1026.557806,1008.547242,1044.568371,1026.557806,1027.541822,	4373	0	33.56	RVSLVGADDLR	2	1200.67	84.0636	577	NA	NA	NA	0	1	0	0	452	46.5514	84.0636	8746	52.2736	31.79	0.0638747	38	4292
12	11	NA	NA	NA	y1,b2,b2-NH3,y2,b3,y3,y3-NH3,b4,b4-NH3,y4,b5,b5-NH3,y5,b6,y6,y6-NH3,	175.118951,200.102966,183.076417,262.150981,331.143456,375.235041,358.208492,430.211866,413.185317,474.303451,543.295926,526.269377,605.343941,630.327956,733.402521,716.375972,	2693	0	27.43	AQMVLSR	2	804.44	99.6257	577	NA	NA	NA	0	0	0	0	223	43.483	99.6257	5386	54.668	44.9578	0.0645755	39	4304
12	11	NA	NA	NA	y1,y1-NH3,y2,y2-NH3,b2,y3,y3-H2O,b3,y4,b4,y5,y5-H2O,y5-NH3,b5,b6,b6-H2O,y6,y6-H2O,	175.118951,158.092402,274.187361,257.160812,311.139016,403.229951,385.219386,440.181606,516.314011,553.265666,645.356601,627.346036,628.330052,682.308256,781.376666,763.366102,792.425011,774.414446,	6777	0	42.16	YFELEVR	2	955.488	99.6257	577	NA	NA	NA	0	0	0	0	392	45.9329	99.6257	13554	28.3149	71.3109	0.0645755	39	4328
12	11	NA	NA	NA	y1,y2,y2-NH3,b2,y3,y3-H2O,y3-NH3,b3,y4,y4-H2O,b4,b4-H2O,y5,y5-H2O,y5-NH3,b5,b5-H2O,b6,b6-H2O,y6,	175.118951,274.187361,257.160812,311.139016,403.229951,385.219386,386.203402,440.181606,516.314011,498.303446,553.265666,535.255102,645.356601,627.346036,628.330052,682.308256,664.297692,781.376666,763.366102,792.425011,	6865	0	42.51	YFELEVR	2	955.488	99.6257	577	NA	NA	NA	0	0	0	0	401	46.0314	99.6257	13730	37.4146	62.2112	0.0645755	39	4329
49	22	NA	NA	NA	y2,b3,y3,b4,y4,b5,y5,b6,y6,y6-H2O,y6-NH3,b7,y7,y7-H2O,b8,b8-H2O,y8,y8-H2O,b11,b12,y11,b13,b14,y13,y13-H2O,y13-NH3,b15,b15-H2O,y11(2+),b20(2+),	288.203011,372.176516,401.287071,485.260576,515.330001,582.313336,643.388581,653.350446,730.420611,712.410046,713.394062,782.393036,843.504671,825.494106,895.477096,877.466532,956.588731,938.578166,1122.604076,1221.672486,1285.747411,1334.756546,1447.840606,1511.915531,1493.904966,1494.888982,1548.888286,1530.877722,1285.747411,2090.199436,	16133	0	94.92	LEELPAELGGLVLLTDLLLSQNLLR	3	2732.58	94.7913	577	NA	NA	NA	0	0	0	0	305	44.843	94.7913	32266	42.0608	52.7304	0.0646193	39	4339
44	24	0.000042,0.964413,0.033905,0.001192,0.000223,0.000223,0.000001,	NA	NA	y3,y4,y5,y6,y6,y7,y7-NH3,y7,y8,y8-H2O,y8,y8,b8,b8-NH3,y9,y9-NH3,b8,b9,b9,y10,y10-H2O,y10-NH3,y10,b10,y11,y12,b13,b13,y14,y14,y14-H2O,y14-NH3,y15,b14,y15,y15-H2O,y15-NH3,b15,y16,y16-H2O,y16-NH3,b16,y17,y17-H2O,y17-NH3,b17,b17-H2O,y18,y18-H2O,y18-NH3,b18,	347.192501,418.229611,489.266721,618.309311,640.291254,747.351901,730.325352,769.333844,818.389011,800.378446,840.370954,840.370954,916.513826,899.487277,933.415951,916.389402,938.495769,987.550936,1009.532879,1062.458541,1044.447976,1045.431992,1084.440484,1084.603696,1199.467424,1256.488884,1369.736156,1391.718099,1444.643761,1466.625704,1448.615139,1449.599155,1515.680871,1520.760689,1537.6628…	11671	0	61.74	VSVIQFLEAPIGDEDAEEAAAEK	2	2453.17	126.293	577	Sodium adduct(1)	NA	NA	1	0	0	0	1460	51.6435	126.293	23342	30.068	96.2251	1.45178231175233e-15	0	709
55	23	NA	NA	NA	b5,b5-H2O,b6,y6,b7,y7,y8,y8-H2O,y8-NH3,b8,b8-H2O,y9,y9-H2O,b10,y10,b11,y11,y11-H2O,b12,b13,b13-H2O,b15,b15,b16,b17,b17-H2O,b17-NH3,y11(2+),y16(2+),y17(2+),y20(2+),b21(2+),	470.260906,452.250342,599.303496,644.336211,700.351176,731.368241,802.405351,784.394786,785.378802,813.435236,795.424672,988.484661,970.474096,999.499286,1085.537421,1128.541876,1182.590181,1164.579616,1257.584466,1385.643046,1367.632482,1629.712576,1629.712576,1758.755166,1886.813746,1868.803182,1869.787197,1182.590181,1811.819461,1940.862051,2255.968691,2338.035686,	8164	0	47.12	LALDGETLGEEEQEDEQPPWASPSPTSR	3	3068.4	91.2447	577	NA	NA	NA	0	0	0	0	841	49.248	91.2447	16328	29.1146	62.1302	0.0701213	42	4360
61	24	NA	NA	NA	b2,y2,y3,y4,b6,y5,y6,b9,b9-NH3,y8,y9,y9-NH3,b11,b12,b12-NH3,y12,b13,b9(2+),y8(2+),b11(2+),y11(2+),b14(2+),b15(2+),b16(2+),y16(2+),b23(2+),b25(2+),	201.123366,288.203011,417.245601,530.329661,593.340556,631.377341,730.445751,935.494486,918.467937,957.572741,1028.609851,1011.583302,1121.594926,1234.678986,1217.652437,1312.758301,1362.737566,935.494486,957.572741,1121.594926,1255.736841,1433.774676,1546.858736,1643.911496,1680.927871,2270.213866,2497.340856,	14086	0	74.62	SLAHLALNDVSLQALPGDVGNLANLVTLELR	5	3226.78	88.4198	577	NA	NA	NA	0	0	0	0	584	47.6641	88.4198	28172	33.5264	54.8934	0.0706174	42	4362
48	41	0.991995,0.006539,0.001226,0.000230,0.000008,0.000002,0.000000,	NA	NA	b3,y2,y2-NH3,b4,y3,y4,y5,y5-NH3,y6,y6,b6,y7,y8,b8,y9,b9,y10,b10,b10-NH3,b10,b10-NH3,y11,b11,y12,y13,b13,y13,y14,b14,b14-NH3,y14,b15,b15-H2O,b18,b11(2+),y12(2+),y13(2+),b13(2+),y15(2+),y15(2+),y16(2+),y16(2+),y17(2+),y18(2+),y19(2+),b20(2+),b21(2+),y20(2+),b22(2+),y21(2+),y22(2+),b23(2+),y23(2+),	286.176126,303.213911,286.187362,399.260186,432.256501,503.293611,574.330721,557.304172,645.367831,667.349774,674.387176,774.410421,903.453011,938.495769,974.490121,1009.532879,1089.517061,1106.585639,1089.559090,1106.585639,1089.559090,1218.559651,1219.669699,1333.586591,1390.608051,1391.718099,1412.589994,1503.692111,1520.760689,1503.734140,1525.674054,1635.787629,1617.777065,1964.909919,1219.6…	10747	0	57.44	VSVIQFLEAPIGDEDAEEAAAEKR	3	2609.28	334.452	577	Sodium adduct(1)	NA	NA	1	1	0	0	1499	51.758	334.452	21494	83.7747	250.677	1.53025086683321e-100	0	5
49	40	0.963696,0.033880,0.001191,0.001191,0.000042,0.000000,0.000000,	NA	NA	b3,b3-H2O,y2,y2-NH3,b4,y3,y4,b5,b5-H2O,y5,y5-NH3,y6,y7,y7-H2O,y8,b8,y9,b9,b9-H2O,b9,y10,b10,b10-NH3,b10,b10-NH3,y10,y11,b11,b11-NH3,y13,b13,y13,b14,b14-H2O,y15,b15,b15,b17,b18,b18,y7(2+),y11(2+),b11(2+),y13(2+),b13(2+),b14(2+),y15(2+),y16(2+),y17(2+),y18(2+),y19(2+),b20(2+),b21(2+),y20(2+),b22(2+),y21(2+),y22(2+),	286.176126,268.165562,303.213911,286.187362,399.260186,432.256501,503.293611,527.318766,509.308202,574.330721,557.304172,645.367831,774.410421,756.399856,903.453011,938.495769,974.490121,987.550936,969.540372,1009.532879,1089.517061,1106.585639,1089.559090,1106.585639,1089.559090,1111.499004,1218.559651,1219.669699,1202.643150,1390.608051,1391.718099,1412.589994,1520.760689,1502.750125,1600.74487…	10820	0	57.81	VSVIQFLEAPIGDEDAEEAAAEKR	3	2609.27	310.884	577	Sodium adduct(1)	NA	NA	1	1	0	0	1361	51.3386	310.884	21640	56.2022	254.682	2.08767243899177e-84	0	10
46	23	0.965820,0.033955,0.000224,0.000001,0.000000,0.000000,0.000000,	NA	NA	b4,y4,y4-NH3,y5,y6,y7,y7-H2O,y8,b8,y9,y9-H2O,b9,y10,y10-H2O,y10-NH3,y11,y11-H2O,y11-NH3,b11,b11-H2O,b12,b13,b13-NH3,b14,y15,b15,b15-H2O,y16,b16,y17,b17,b17-H2O,y18,y18-NH3,b18,b18-H2O,	399.260186,503.293611,486.267062,574.330721,645.367831,774.410421,756.399856,903.453011,938.495769,974.490121,956.479556,1009.532879,1089.517061,1071.506496,1072.490512,1218.559651,1200.549086,1201.533102,1219.669699,1201.659135,1276.691159,1391.718099,1374.691550,1520.760689,1600.744871,1635.787629,1617.777065,1671.781981,1706.824739,1822.806514,1835.867329,1817.856765,1935.890574,1918.864025,19…	10785	0	57.63	VSVIQFLEAPIGDEDAEEAAAEKR	2	2609.28	110.884	577	Sodium adduct(1)	NA	NA	1	1	0	0	1488	51.726	110.884	21570	28.2281	82.6562	1.82756537949373e-09	0	1466
46	21	0.999595,0.000232,0.000043,0.000043,0.000043,0.000043,0.000000,	NA	NA	b2,b3,b3-H2O,y2,y2-NH3,y4,y5,y5-NH3,y6,b8,b8,b9,b12,b14,y5(2+),y6(2+),b8(2+),b10(2+),y11(2+),y12(2+),y13(2+),y14(2+),y15(2+),y16(2+),y17(2+),y19(2+),y21(2+),	187.107716,286.176126,268.165562,303.213911,286.187362,503.293611,574.330721,557.304172,667.349774,916.513826,938.495769,1009.532879,1276.691159,1498.778746,574.330721,645.367831,938.495769,1106.585639,1218.559651,1333.586591,1390.608051,1503.692111,1600.744871,1671.781981,1822.806514,2082.958984,2324.101624,	10783	0	57.62	VSVIQFLEAPIGDEDAEEAAAEKR	4	2609.27	92.4445	577	Sodium adduct(1)	NA	NA	1	1	0	0	1369	51.364	92.4445	21566	43.3056	49.1389	0.0398584	30	4192
45	20	NA	NA	NA	y2,b3,b3-H2O,b4,b4-H2O,b5,y5,b6,b6-H2O,y6,y6-H2O,b7,b8,b8-H2O,b8-NH3,b11,y10,y10-H2O,y10-NH3,b12,b13,y10(2+),y14(2+),y16(2+),y17(2+),y18(2+),y19(2+),b21(2+),	274.187361,288.119006,270.108442,425.177916,407.167352,553.236496,587.387511,682.279086,664.268522,700.471571,682.461006,753.316196,852.384606,834.374042,835.358057,1123.537806,1142.660171,1124.649606,1125.633622,1236.621866,1392.722976,1142.660171,1595.966511,1782.066951,1853.104061,1982.146651,2110.205231,2261.195786,	12742	0	67.02	DATHQEAVSALLRPCLELSLLVR	3	2534.38	85.8209	577	NA	NA	NA	0	1	0	0	879	49.4399	85.8209	25484	40.5331	45.2877	0.0727235	42	4386
33	22	0.457143,0.457143,0.085714,	NA	NA	y2,y3,b3,y4,y5,y6,b6,b6*,y7,y8,y8-NH3,b7,b8,b9,y11,y13,y5(2+),y7(2+),b7(2+),b8(2+),b9(2+),b10(2+),b11(2+),b12(2+),	288.203011,416.261591,487.170077,530.304521,601.341631,716.368571,816.328757,718.333487,829.452631,942.536691,925.510142,945.371347,1058.455407,1171.539467,1313.705931,1513.822021,601.341631,829.452631,945.371347,1058.455407,1171.539467,1284.623527,1399.650467,1470.687577,	10278	0	55.26	YSRSLEELLLDANQLR	3	1999.99	141.93	577	Phosphorylation(1)	NA	NA	1	1	0	0	1274	51.0517	141.93	20556	55.2348	86.6955	4.52806397522812e-09	0	1563
